# Supplementary material for: Endo-lysosomal proteins and ubiquitin CSF concentrations in Alzheimer’s and Parkinson’s disease
Source: Springer Nature journal article supplement (doi:10.1186/s13195-019-0533-9), 2019-09-14

## **Additional File 4**

Endo-Lysosomal Proteins and Ubiquitin CSF Concentrations in Alzheimer's and Parkinson's Disease

Simon Sjödin<sup>1,2</sup>, Gunnar Brinkmalm<sup>1,2</sup>, Annika Öhrfelt<sup>1,2</sup>, Lucilla Parnetti<sup>3</sup>, Silvia Paciotti<sup>4</sup>, Oskar Hansson<sup>5,6</sup>, John Hardy<sup>7</sup>, Kaj Blennow<sup>1,2</sup>, Henrik Zetterberg<sup>1,2,7,8</sup>, Ann Brinkmalm<sup>1,2</sup>

<sup>1</sup>Department of Psychiatry and Neurochemistry, Institute of Neuroscience and Physiology, the Sahlgrenska Academy at the University of Gothenburg, Mölndal, Sweden

<sup>2</sup>Clinical Neurochemistry Laboratory, Sahlgrenska University Hospital, Mölndal, Sweden

<sup>3</sup>Neurology Clinic, University of Perugia, Perugia, Italy

<sup>4</sup>Department of Pharmaceutical Sciences, University of Perugia, Perugia, Italy

<sup>5</sup>Clinical Memory Research Unit, Department of Clinical Sciences Malmö, Lund University, Lund, Sweden

<sup>6</sup>Memory Clinic, Skåne University Hospital, Malmö, Sweden

<sup>7</sup>Department of Molecular Neuroscience, University College London Institute of Neurology, Queen Square, London, UK

<sup>8</sup>UK Dementia Research Institute at UCL, London, United Kingdom

Corresponding Author: Simon Sjödin, Department of Psychiatry and Neurochemistry, Institute of Neuroscience and Physiology, the Sahlgrenska Academy at the University of Gothenburg, House V3, SU/Mölndal, SE-43180, Mölndal, Sweden. [simon.sjodin@neuro.gu.se](mailto:simon.sjodin@neuro.gu.se).

## **Content**

Figure S1

**Figure S1. Limit of quantification.** Six points reversed calibration curves were created by diluting stable isotope labeled peptides and adding these dilutions to a quality control CSF pool sample. The limit of quantification was calculated using least square linear regression and determined as the concentration range with a relative error of calculated to nominal concentration  $\leq 20\%$ . The concentration range is shown in the figure for all peptides analyzed, A-Ay, and a line has been fitted using least square linear regression. Duplicate calibration curves were analyzed in three experiments. The mean of the duplicates are plotted showing the mean and SD for the three experiments.

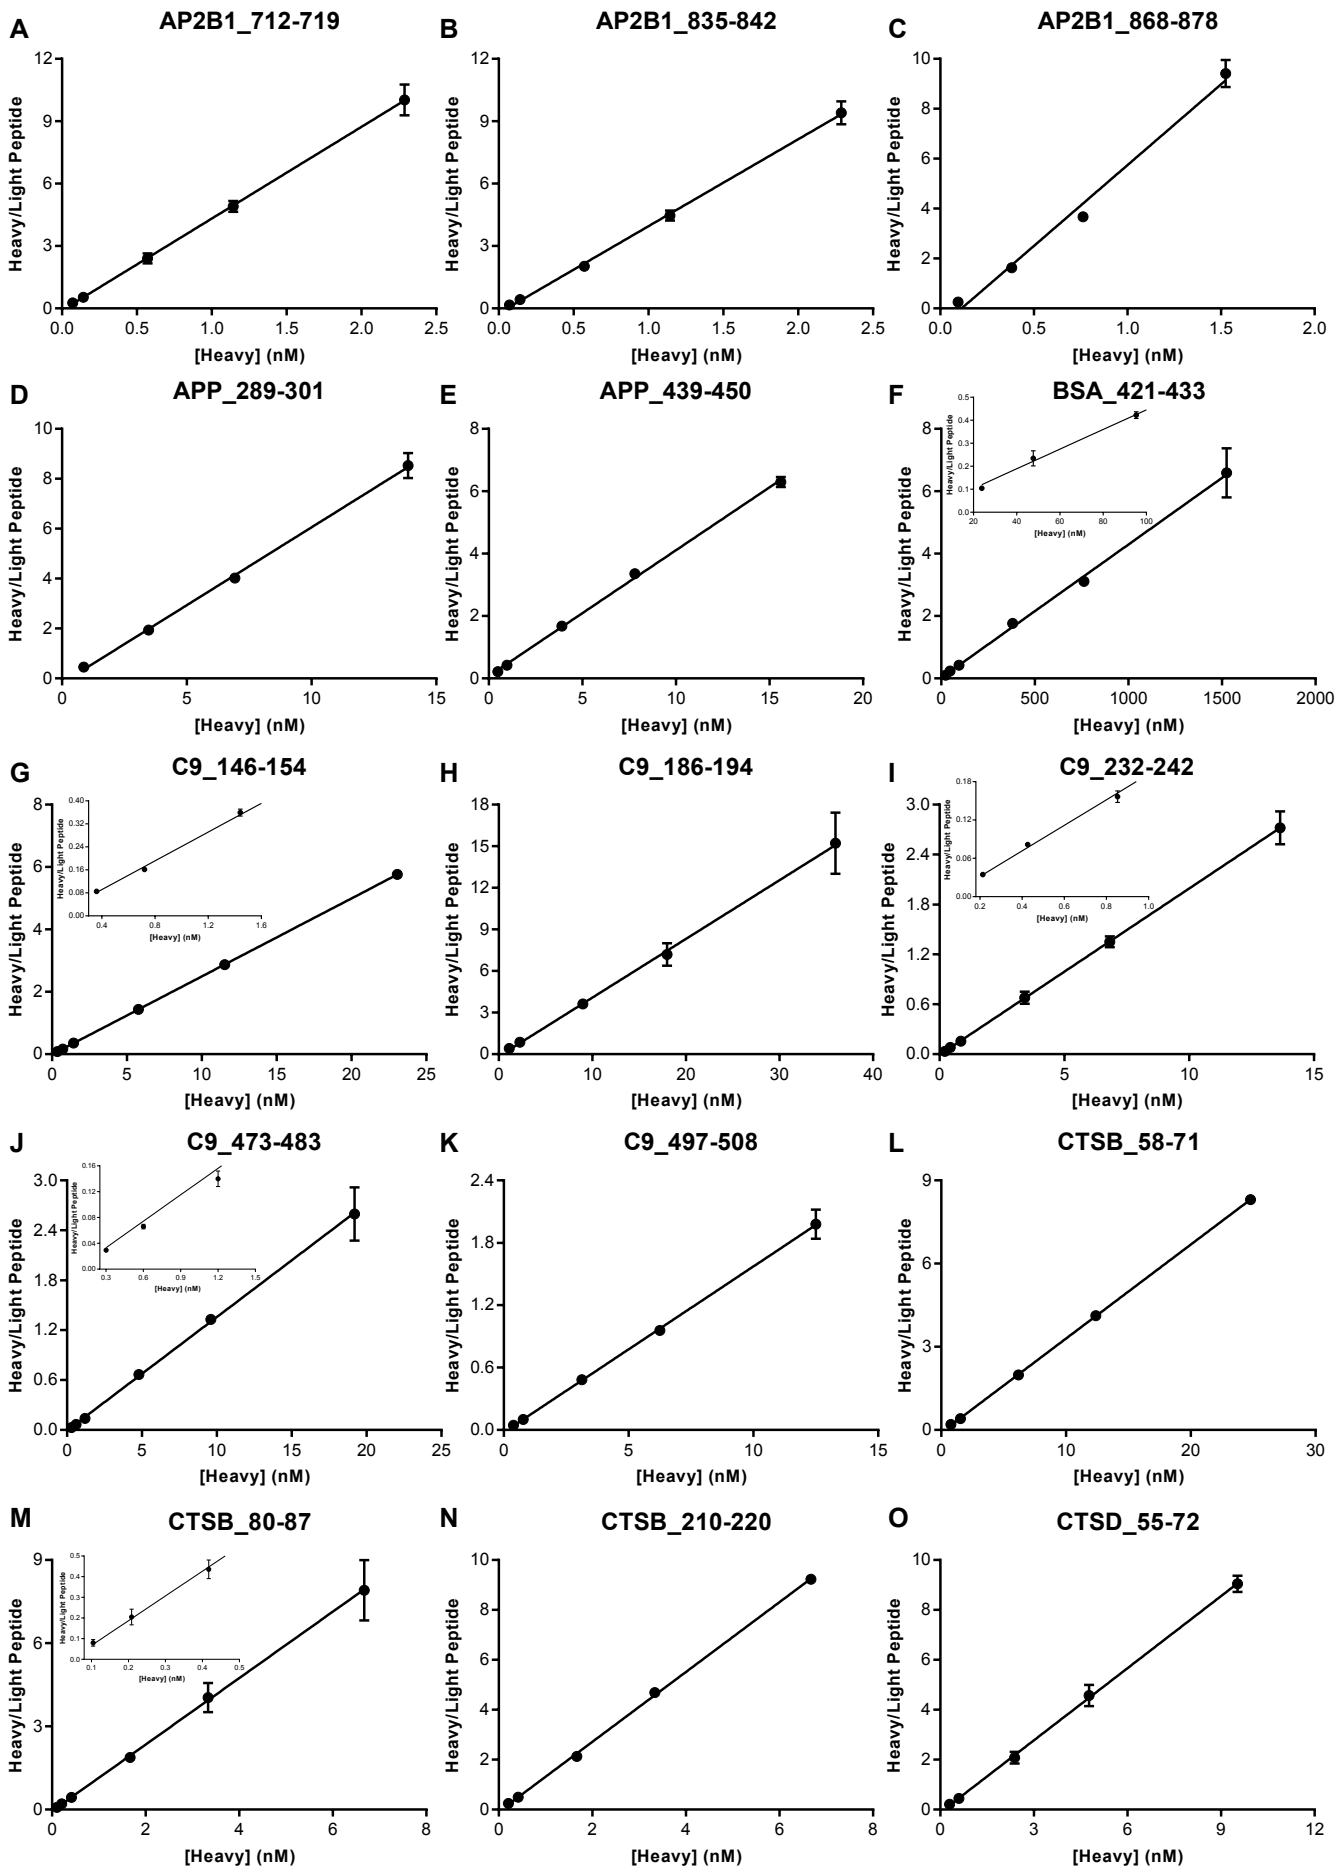

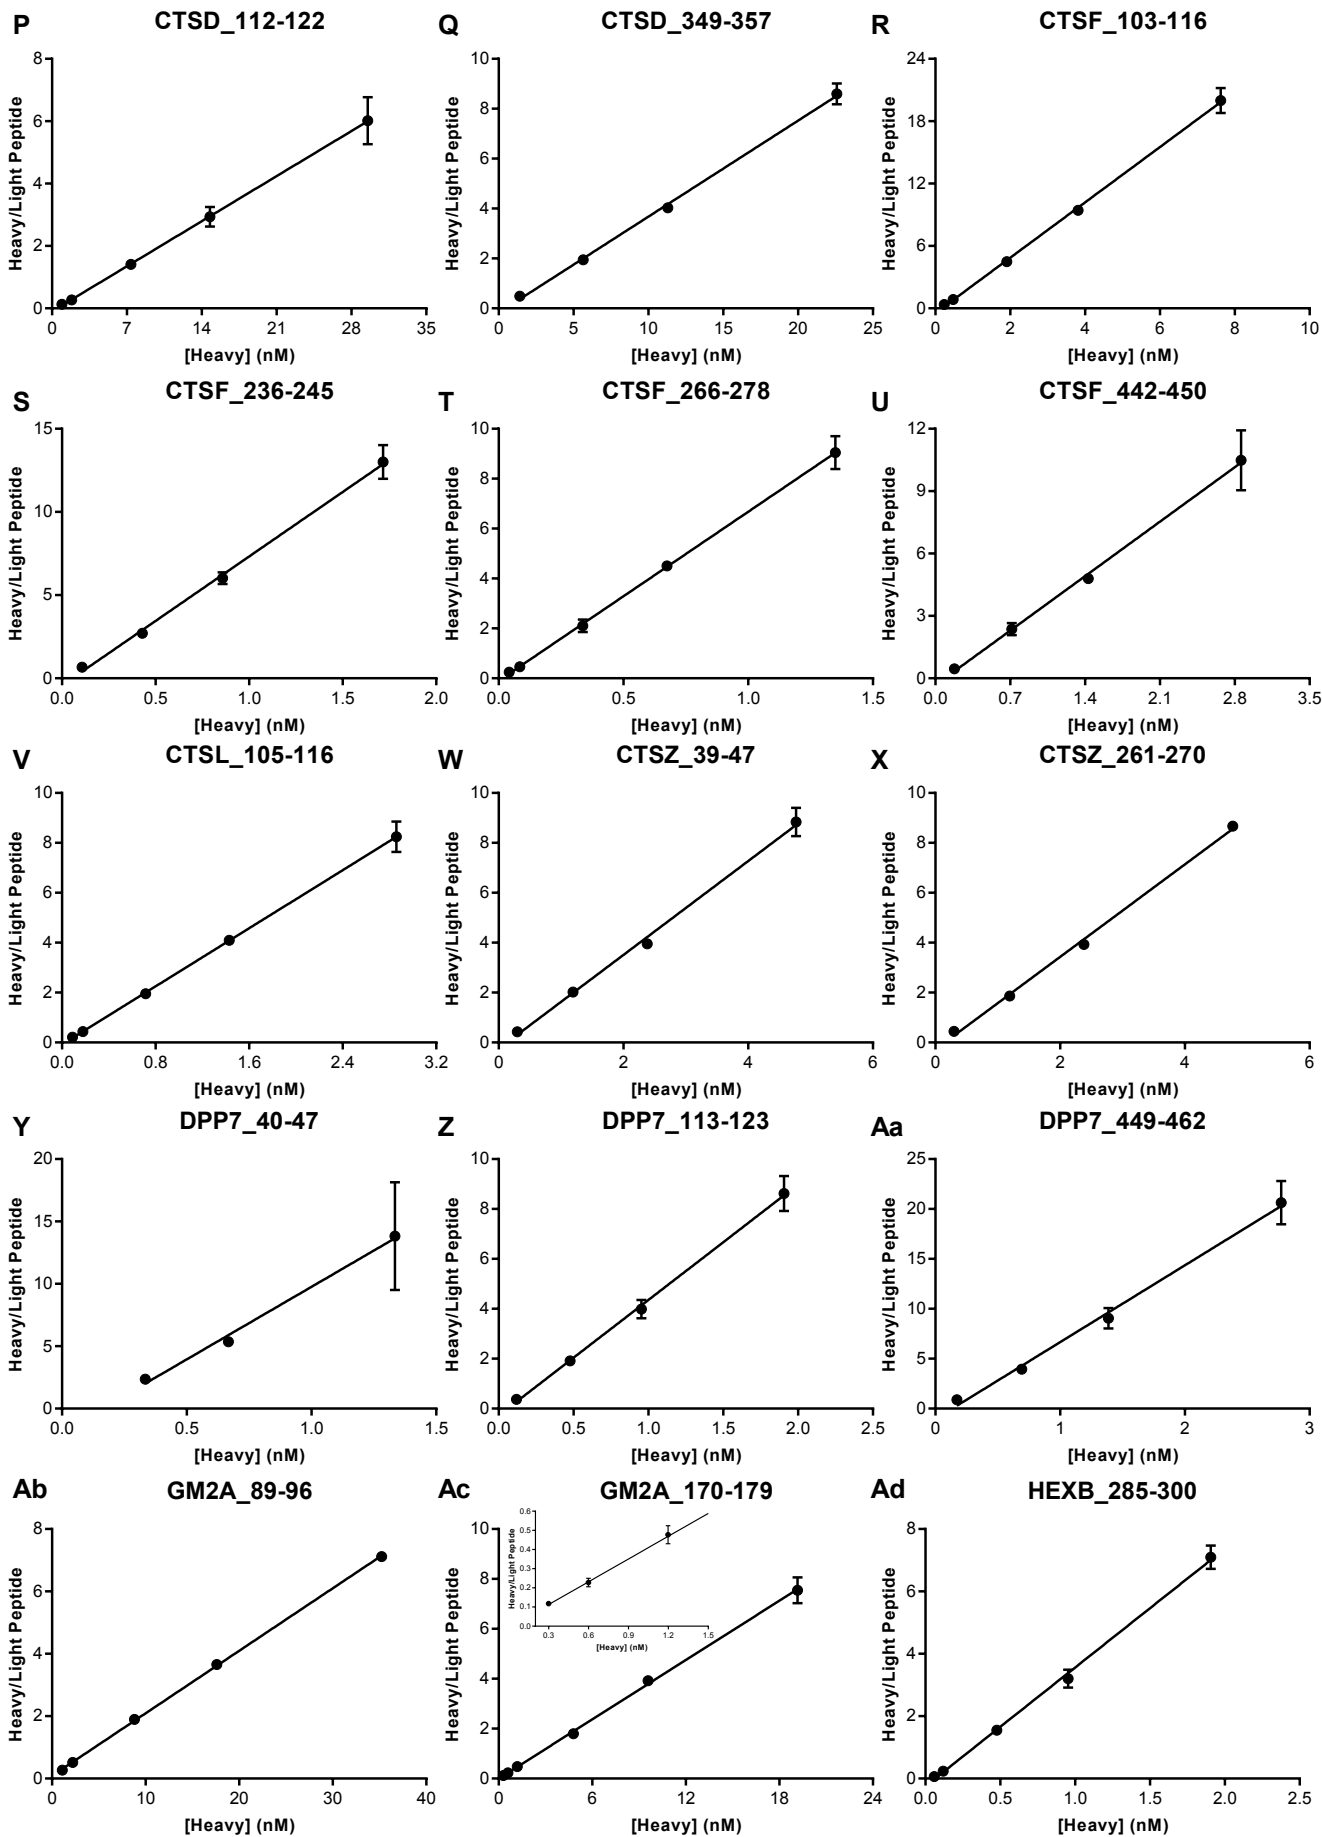

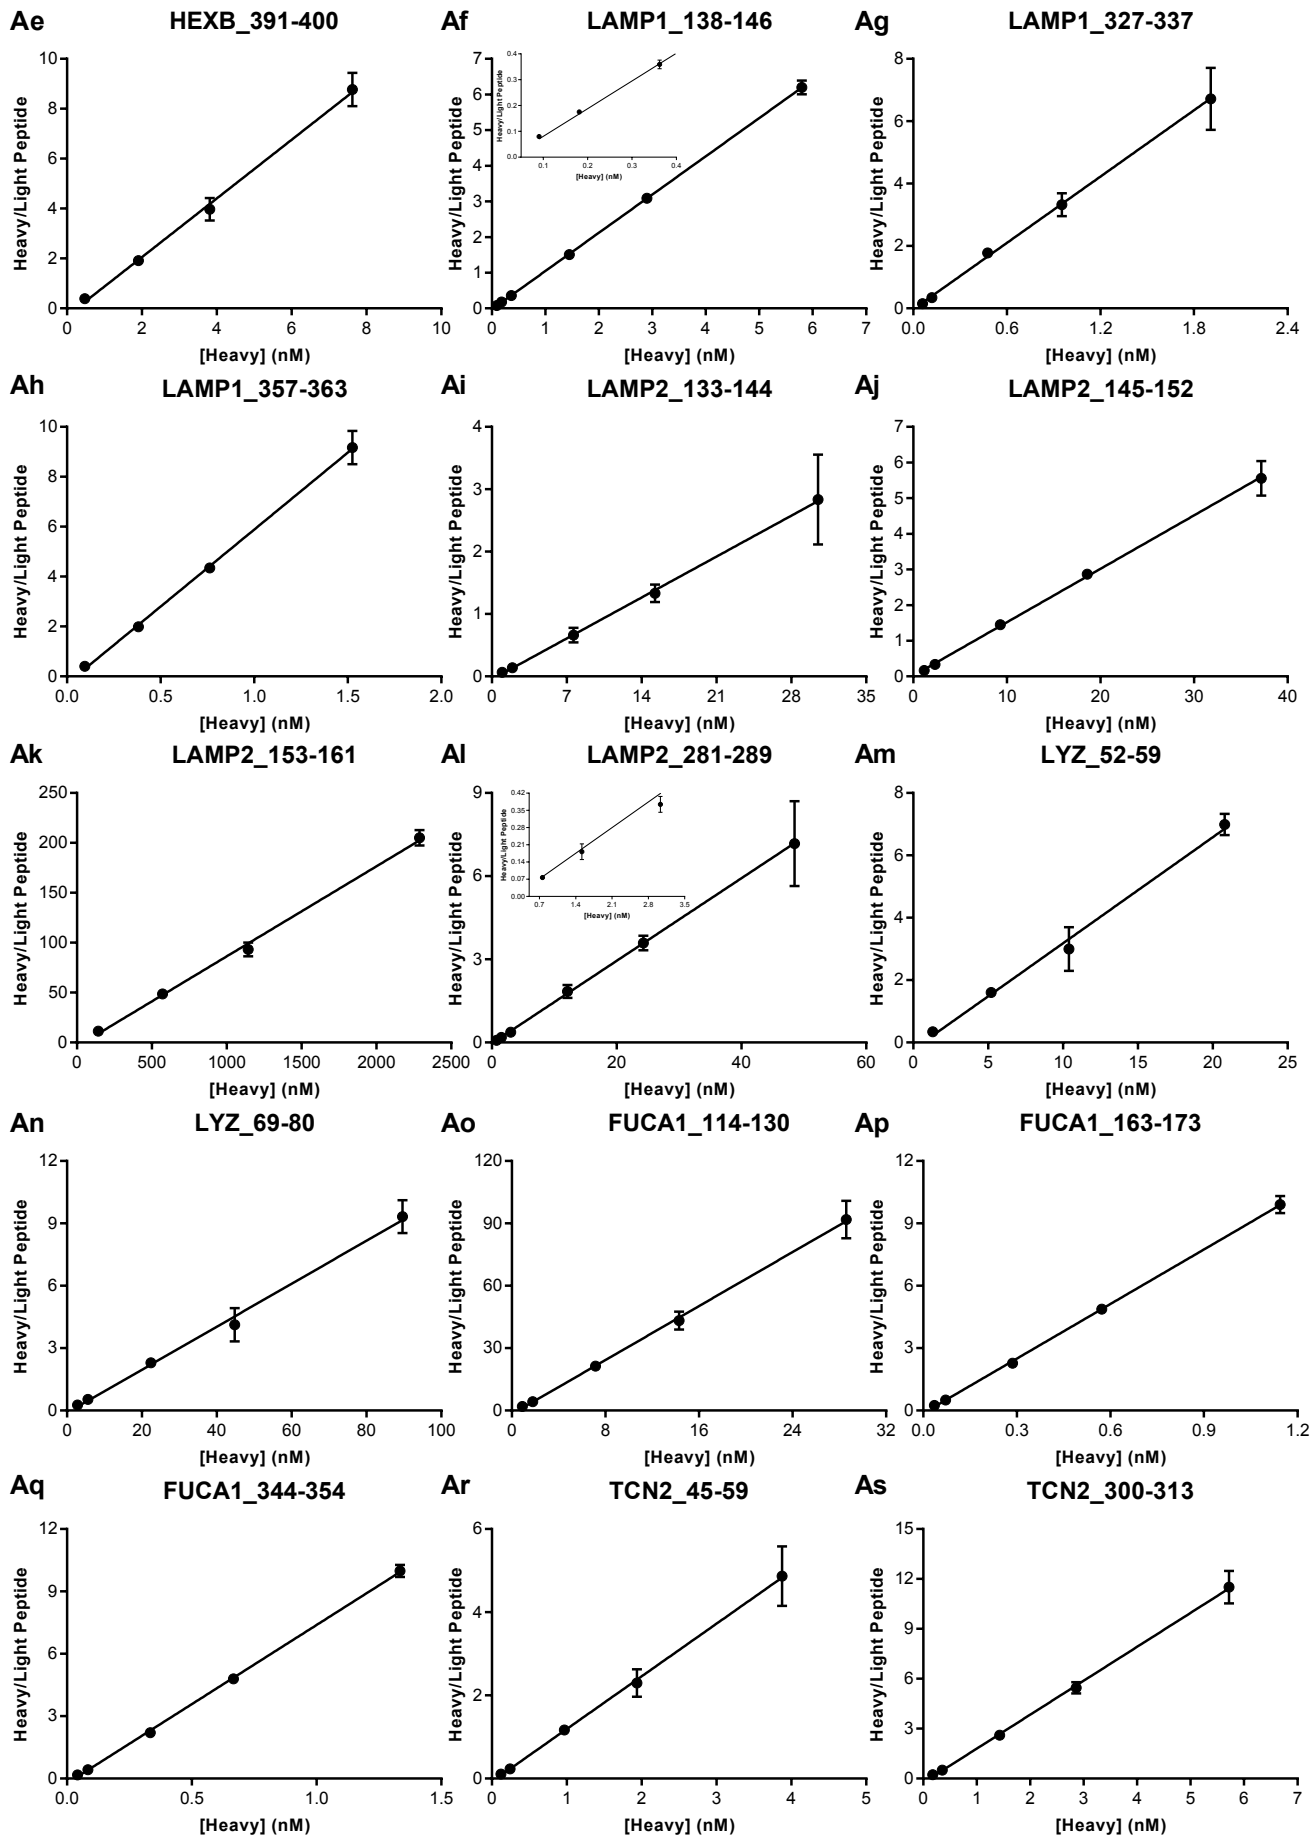

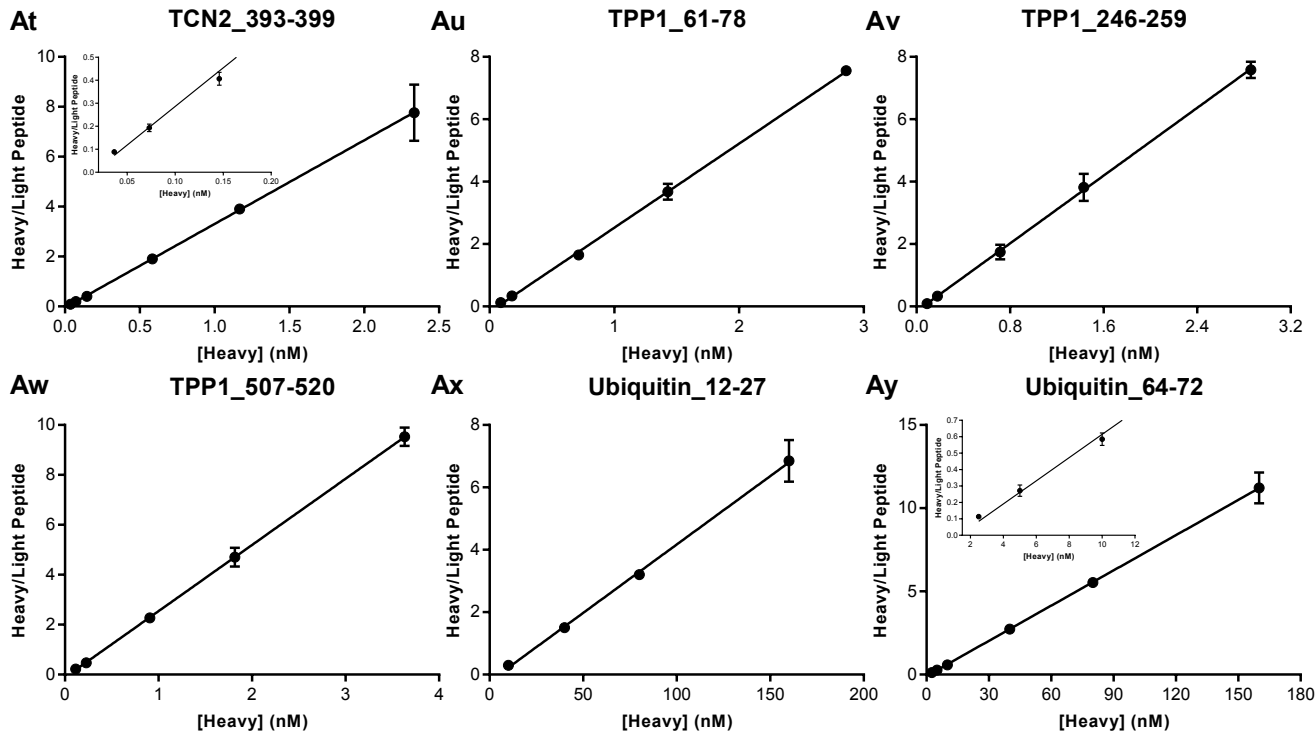

Supplement: MOESM4 [file 17172550]
