# Supplementary material for: Endo-lysosomal proteins and ubiquitin CSF concentrations in Alzheimer’s and Parkinson’s disease
Source: Springer Nature journal article supplement (doi:10.1186/s13195-019-0533-9), 2019-09-14

## **Additional File 5**

Endo-Lysosomal Proteins and Ubiquitin CSF Concentrations in Alzheimer's and Parkinson's Disease

Simon Sjödin<sup>1,2</sup>, Gunnar Brinkmalm<sup>1,2</sup>, Annika Öhrfelt<sup>1,2</sup>, Lucilla Parnetti<sup>3</sup>, Silvia Paciotti<sup>4</sup>, Oskar Hansson<sup>5,6</sup>, John Hardy<sup>7</sup>, Kaj Blennow<sup>1,2</sup>, Henrik Zetterberg<sup>1,2,7,8</sup>, Ann Brinkmalm<sup>1,2</sup>

<sup>1</sup>Department of Psychiatry and Neurochemistry, Institute of Neuroscience and Physiology, the Sahlgrenska Academy at the University of Gothenburg, Mölndal, Sweden

<sup>2</sup>Clinical Neurochemistry Laboratory, Sahlgrenska University Hospital, Mölndal, Sweden

<sup>3</sup>Neurology Clinic, University of Perugia, Perugia, Italy

<sup>4</sup>Department of Pharmaceutical Sciences, University of Perugia, Perugia, Italy

<sup>5</sup>Clinical Memory Research Unit, Department of Clinical Sciences Malmö, Lund University, Lund, Sweden

<sup>6</sup>Memory Clinic, Skåne University Hospital, Malmö, Sweden

<sup>7</sup>Department of Molecular Neuroscience, University College London Institute of Neurology, Queen Square, London, UK

<sup>8</sup>UK Dementia Research Institute at UCL, London, United Kingdom

Corresponding Author: Simon Sjödin, Department of Psychiatry and Neurochemistry, Institute of Neuroscience and Physiology, the Sahlgrenska Academy at the University of Gothenburg, House V3, SU/Mölndal, SE-43180, Mölndal, Sweden. [simon.sjodin@neuro.gu.se](mailto:simon.sjodin@neuro.gu.se).

## **Content**

Figure S2

**Figure S2. Extracted ion chromatograms and MS/MS spectra.** Shown are examples of extracted ion chromatograms (top panels) and MS/MS spectra (bottom panels) acquired by PRM-MS for all peptides targeted, A-Ay. Light indicate the tryptic peptide of endogenous origin and Heavy is the added stable isotope-labeled peptide.

# A; AP2B1\_712-719; AVWLPAVK

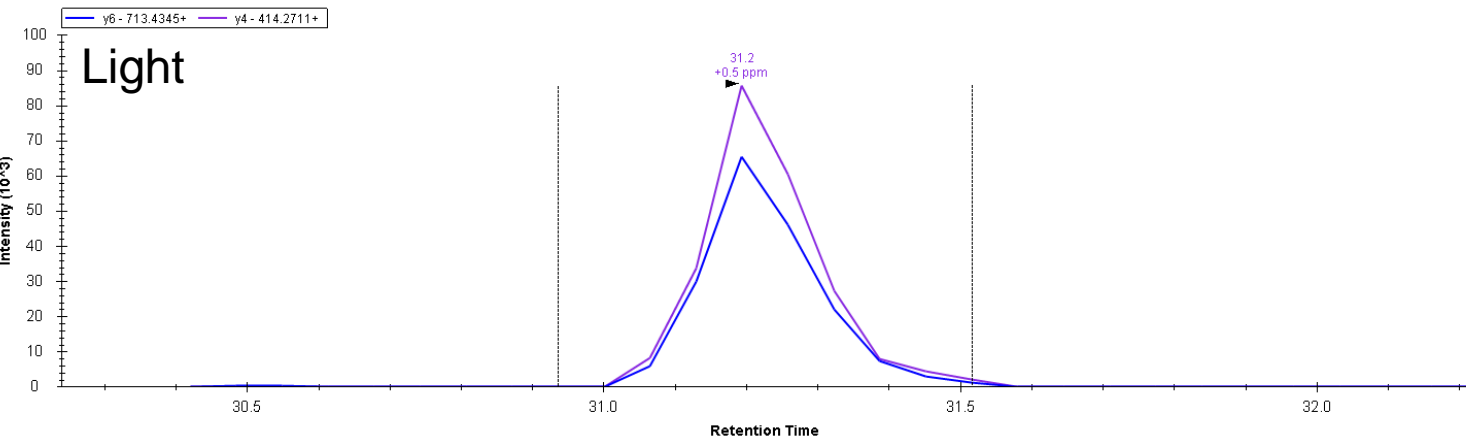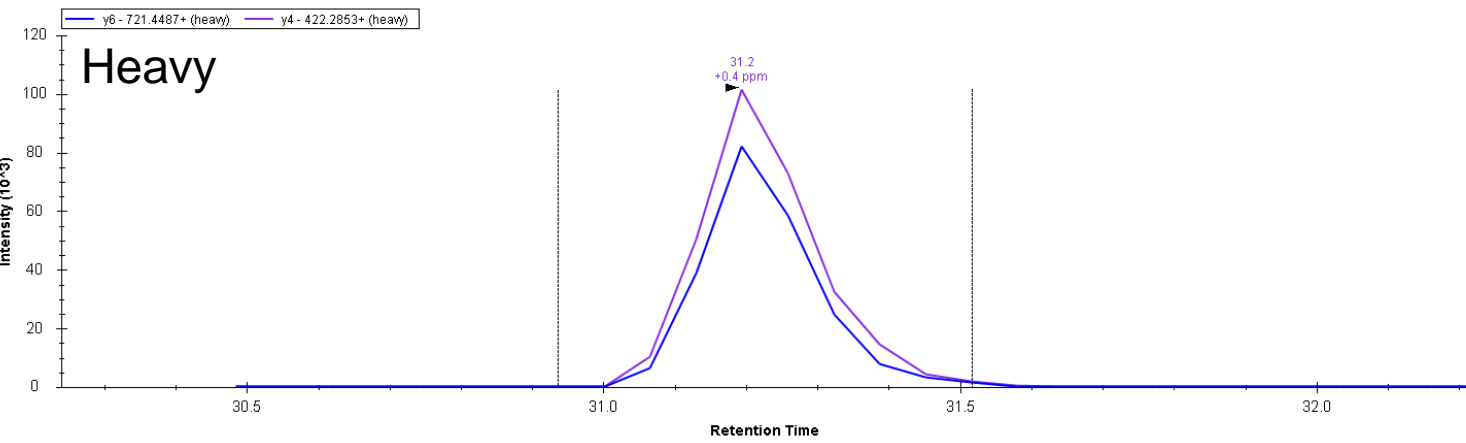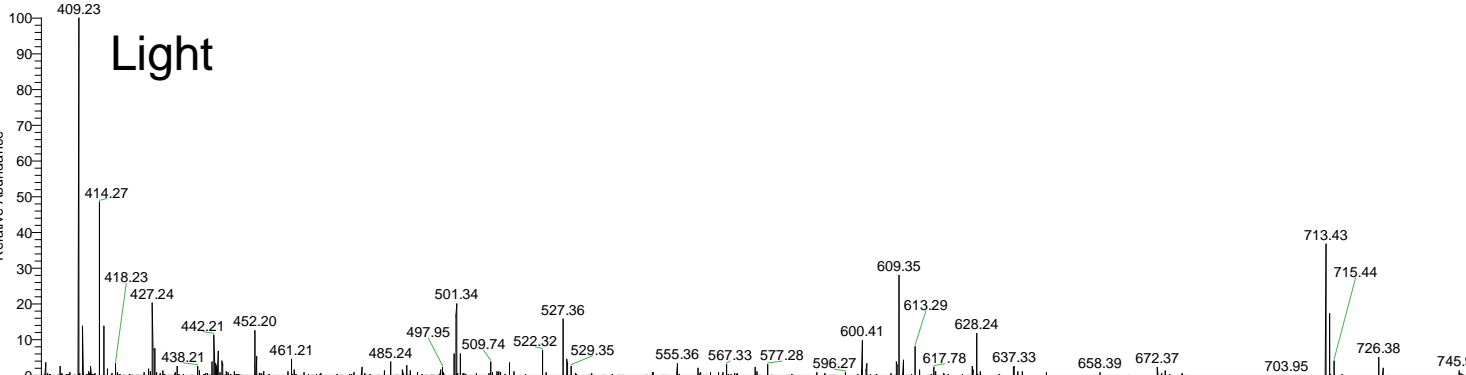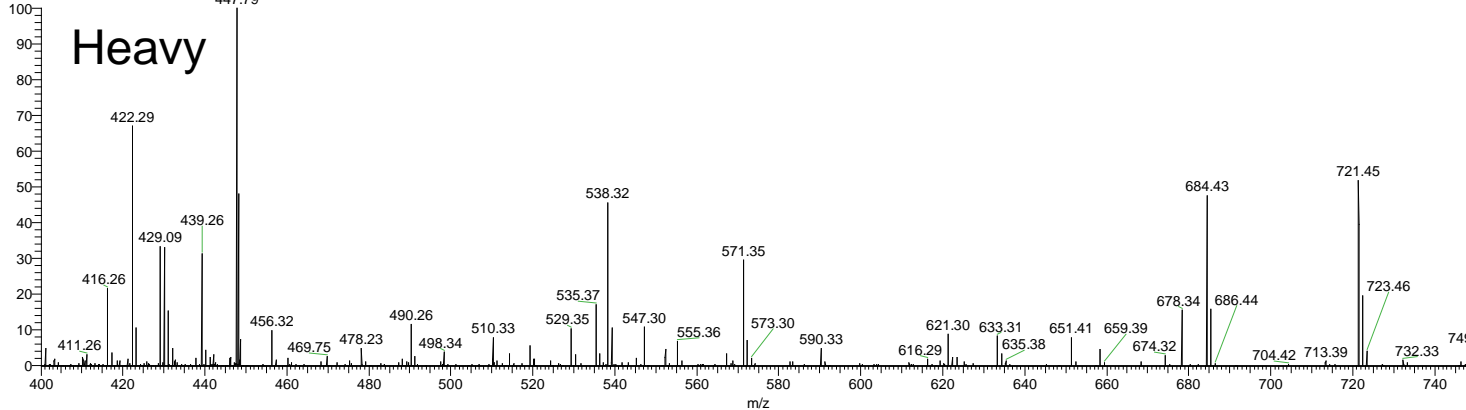

# B; AP2B1\_835-842; QVFLATWK

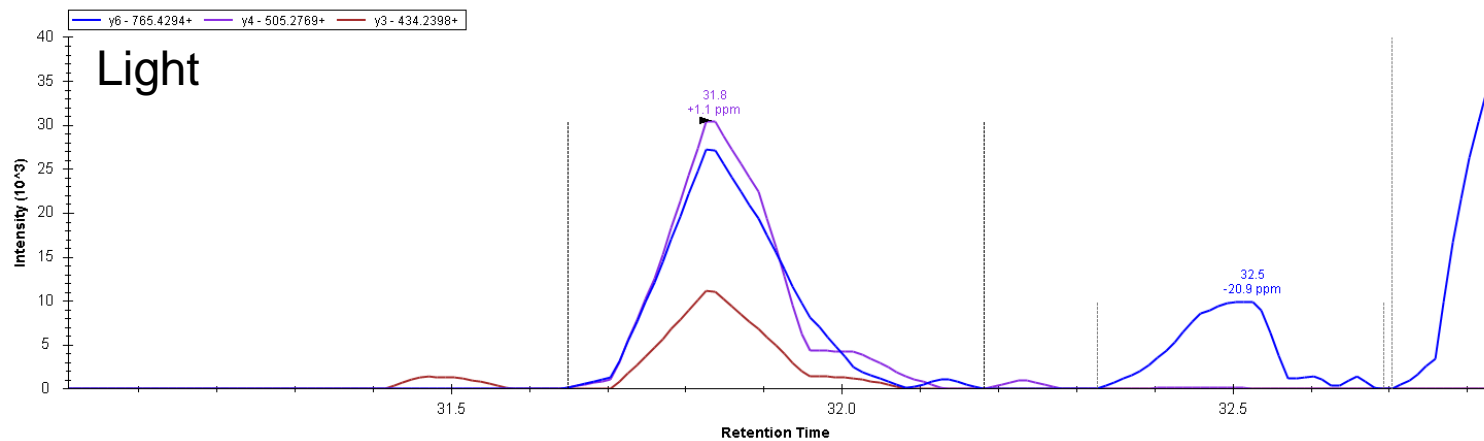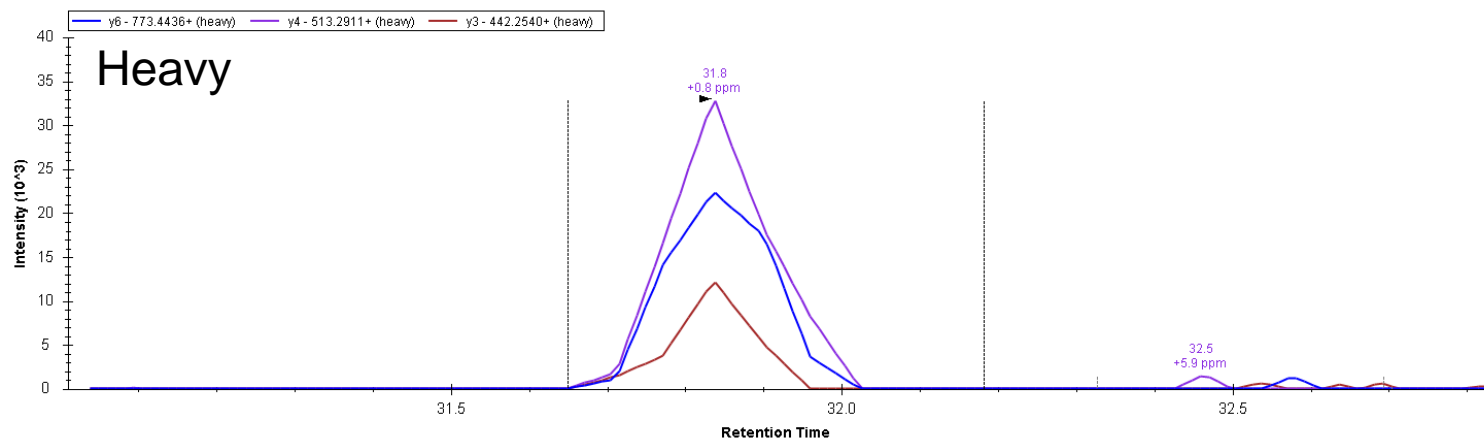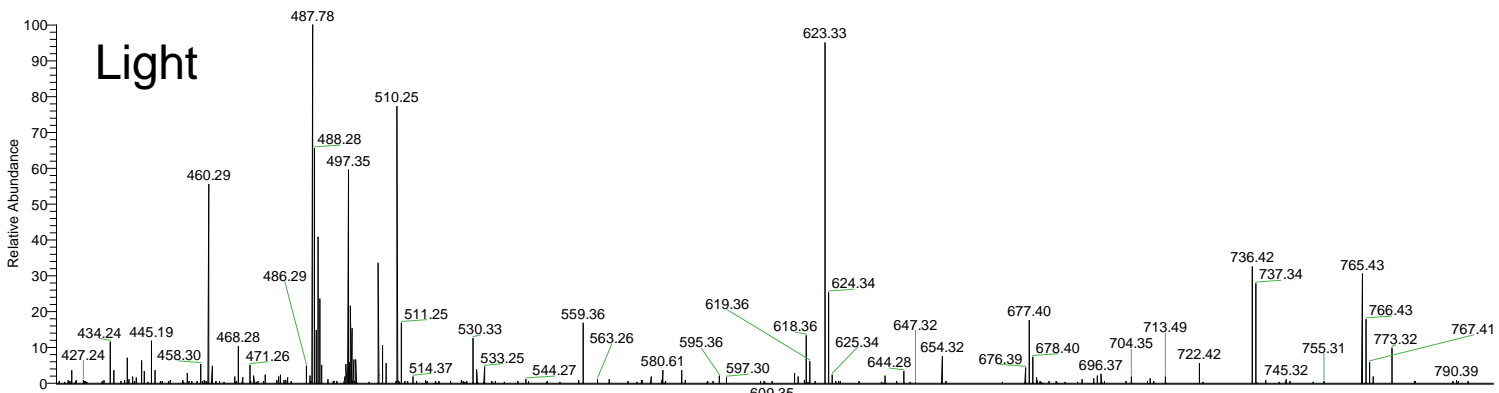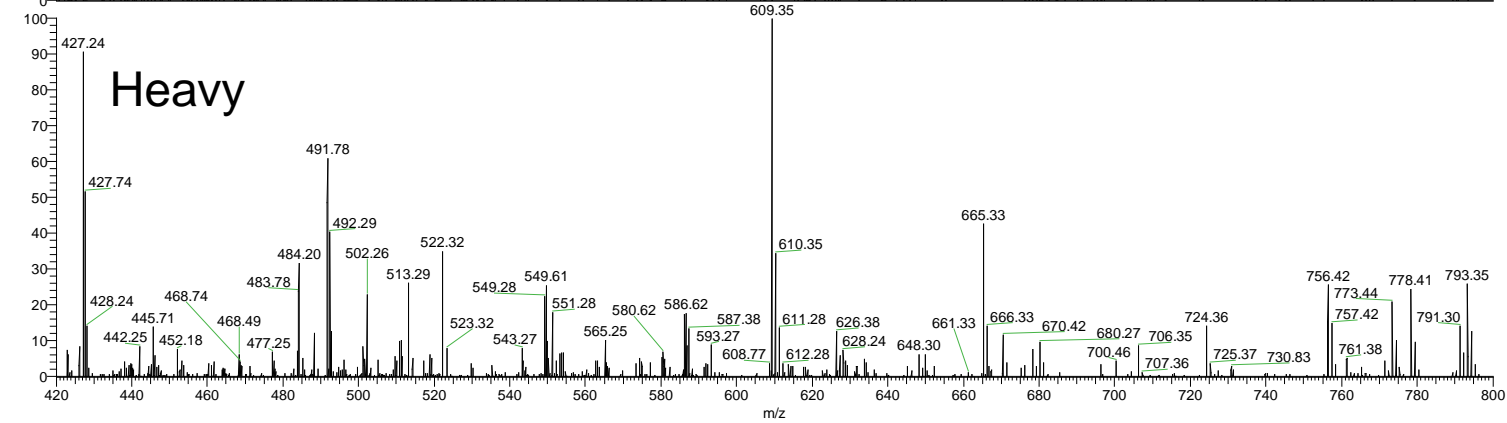

# C; AP2B1\_868-878; LQNNNVYTIAK

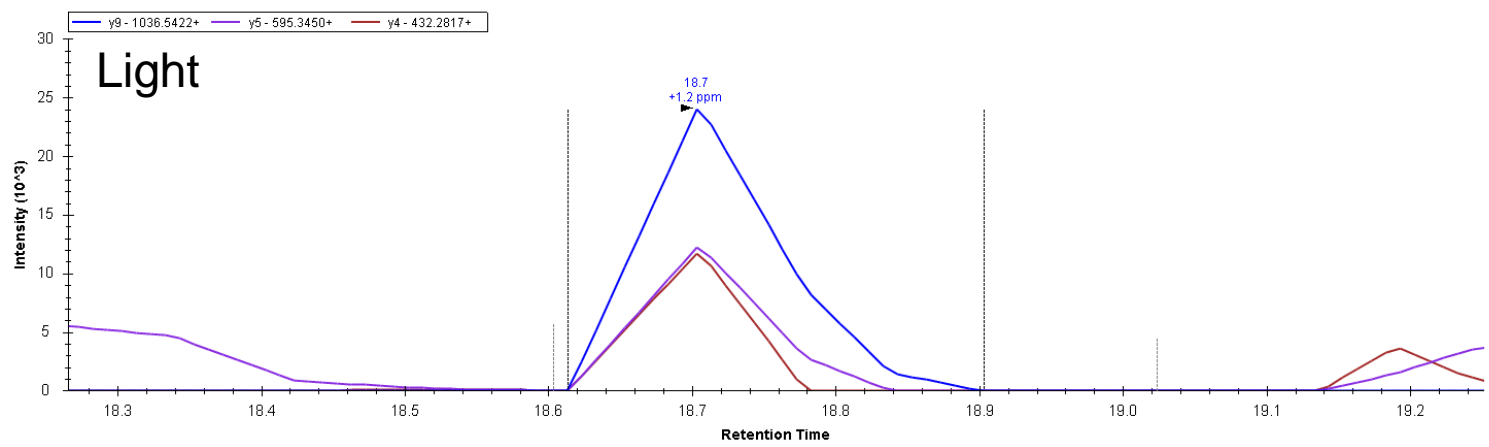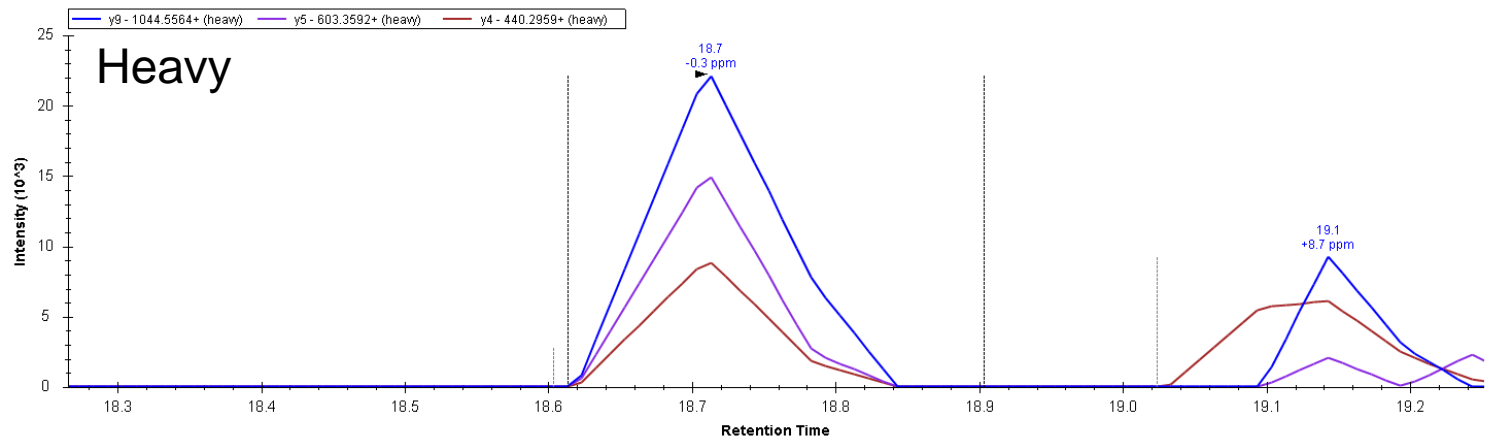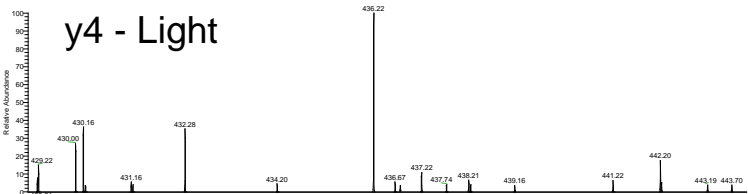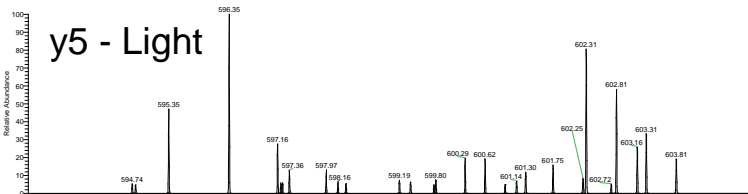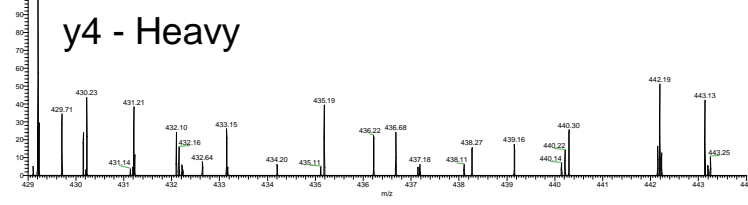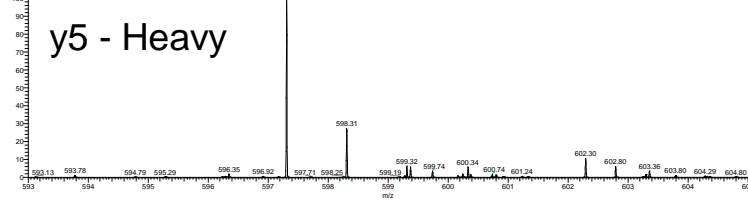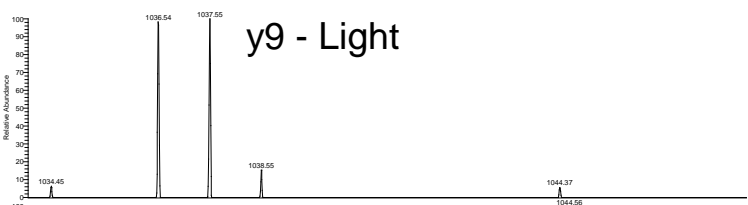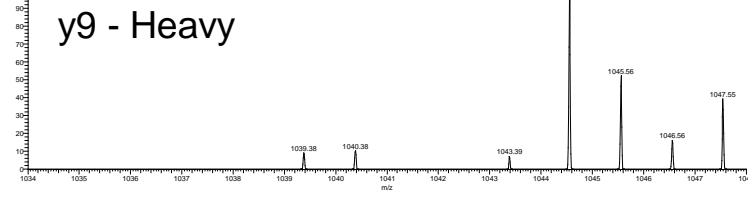

# D; APP\_289-301; EVcSEQAETGPcR

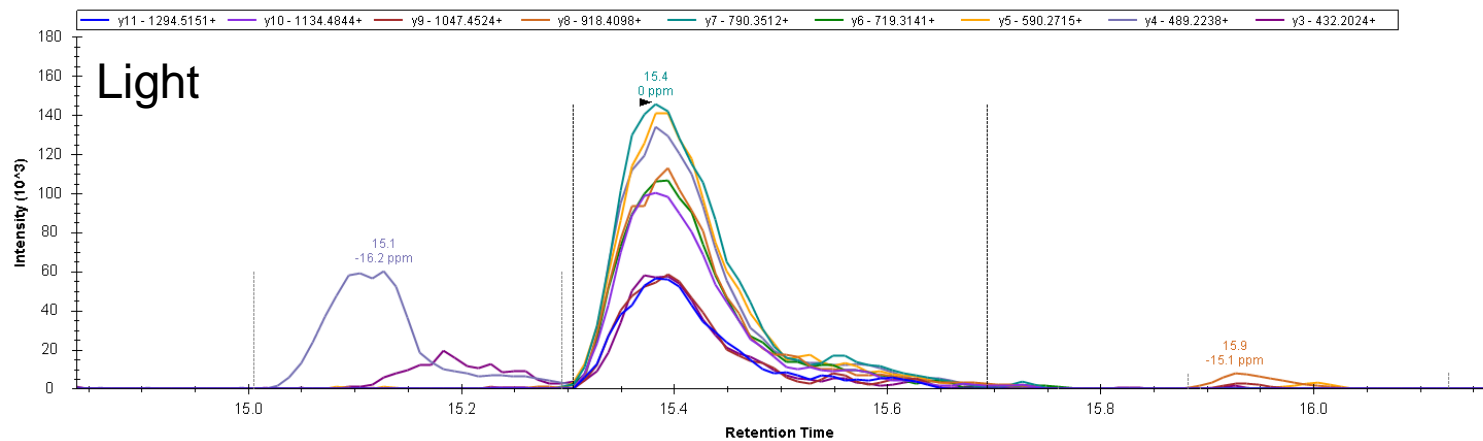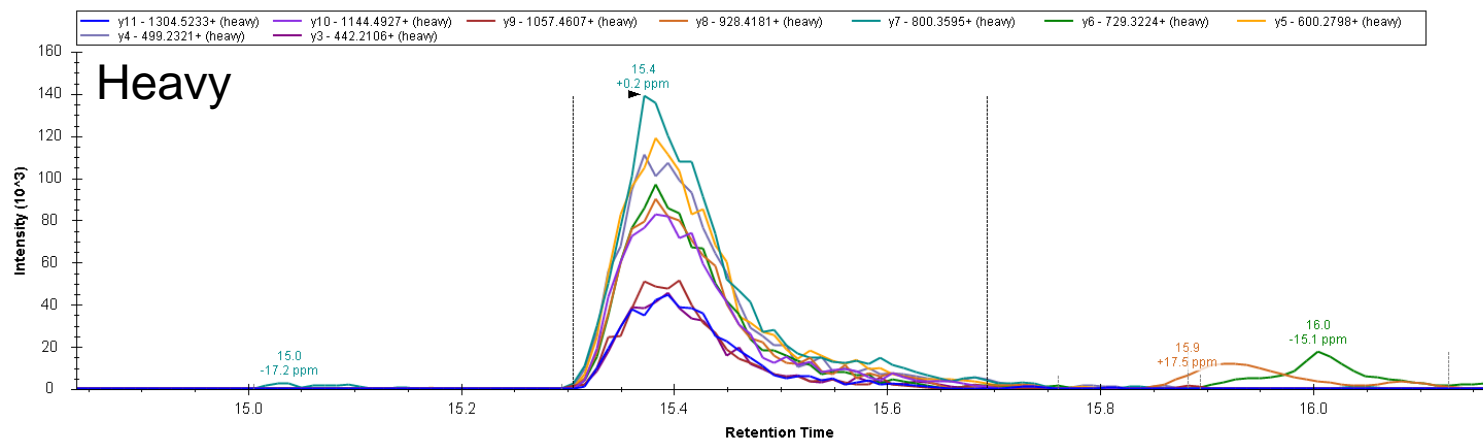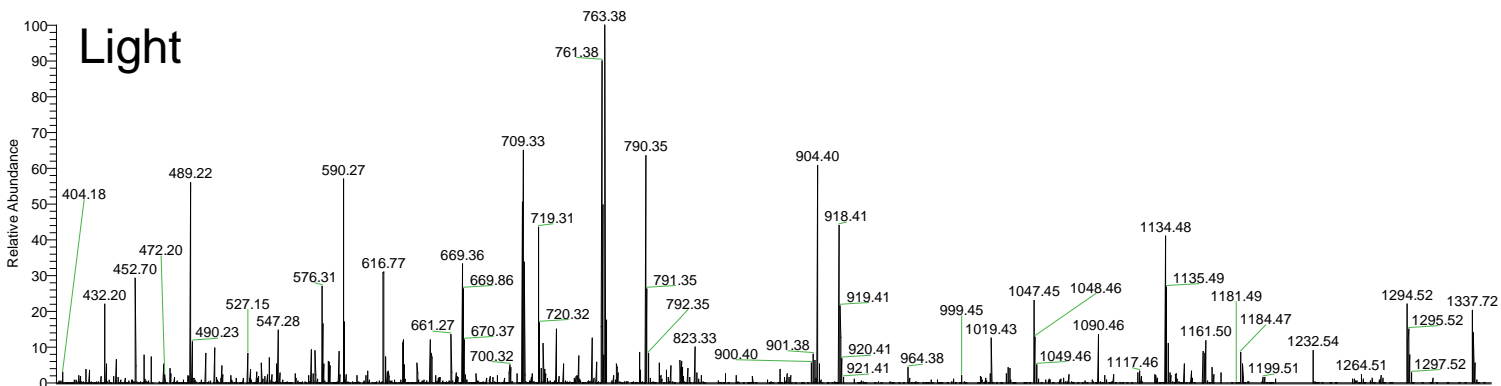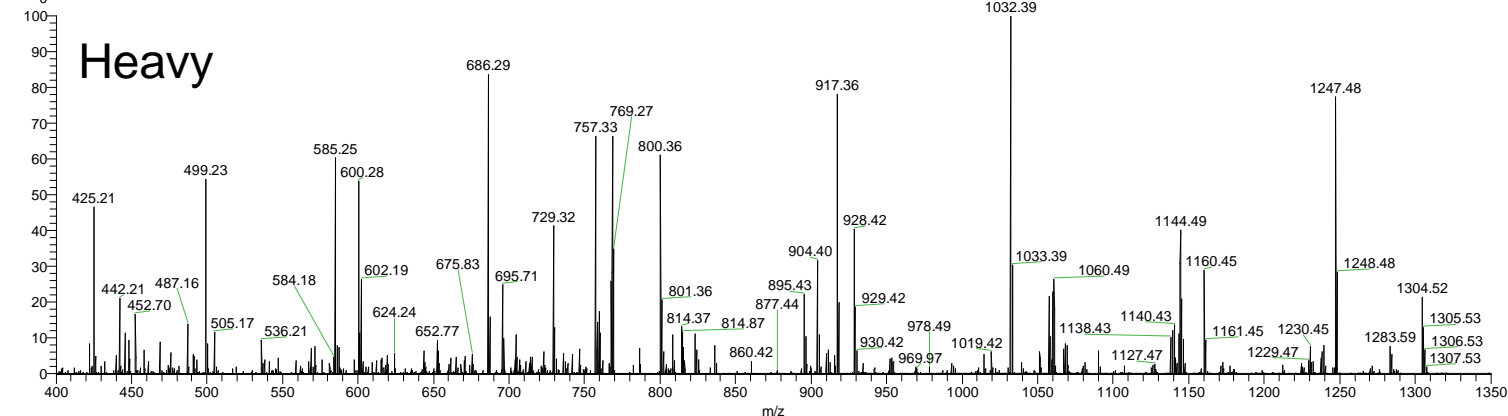

# E; APP\_439-450; VESLEQEAANER

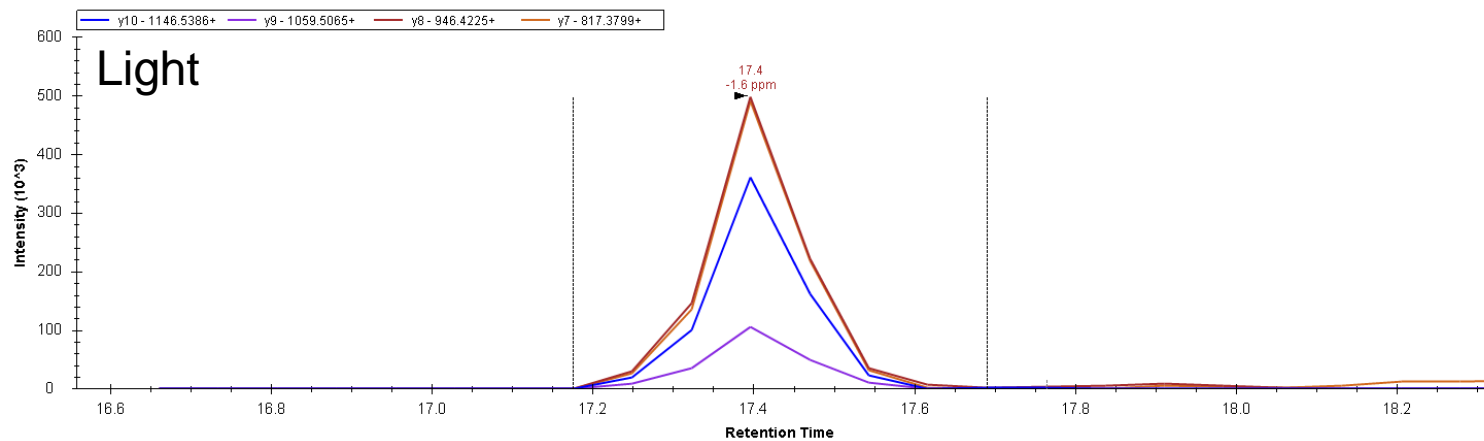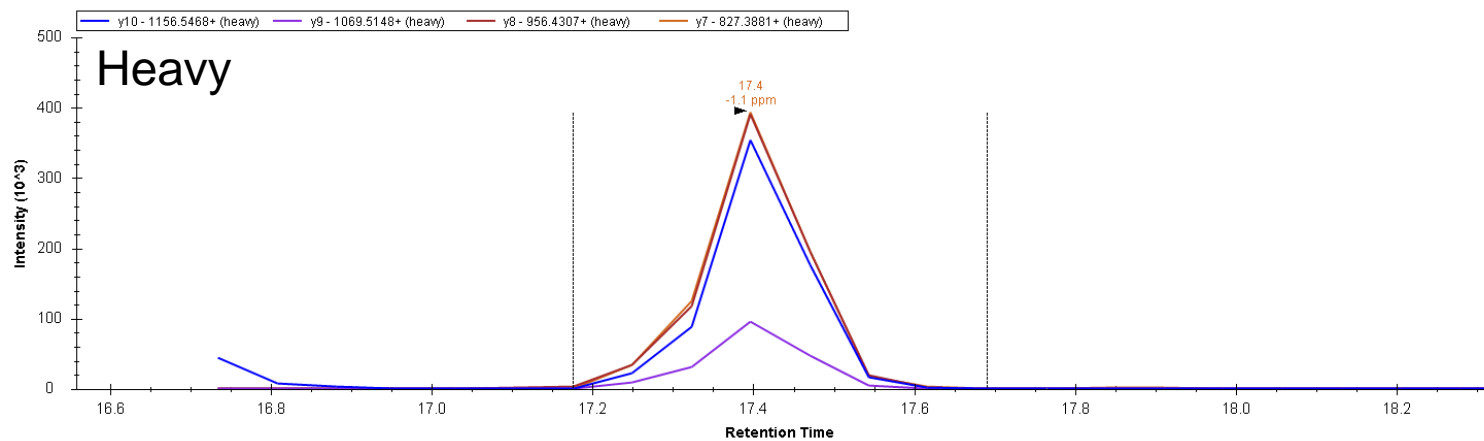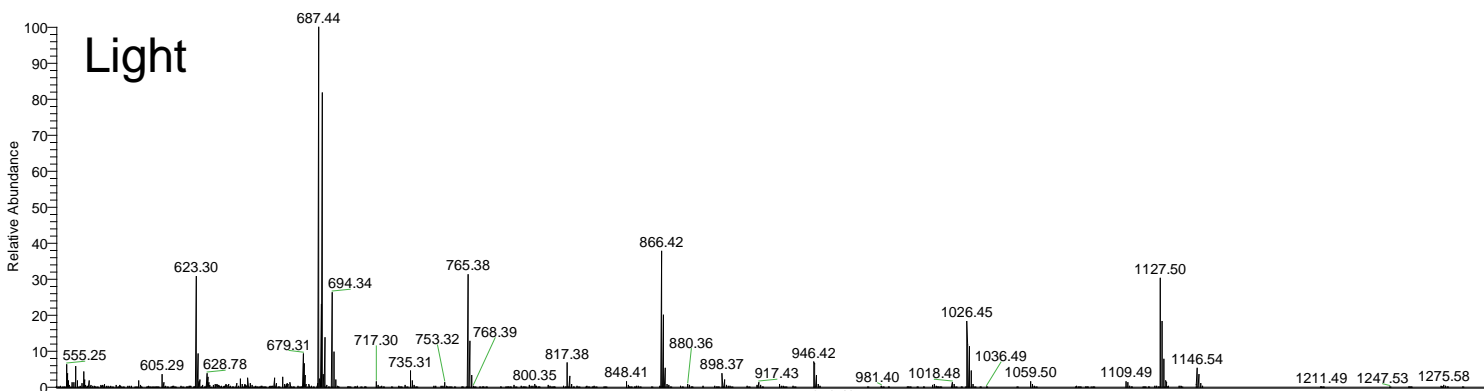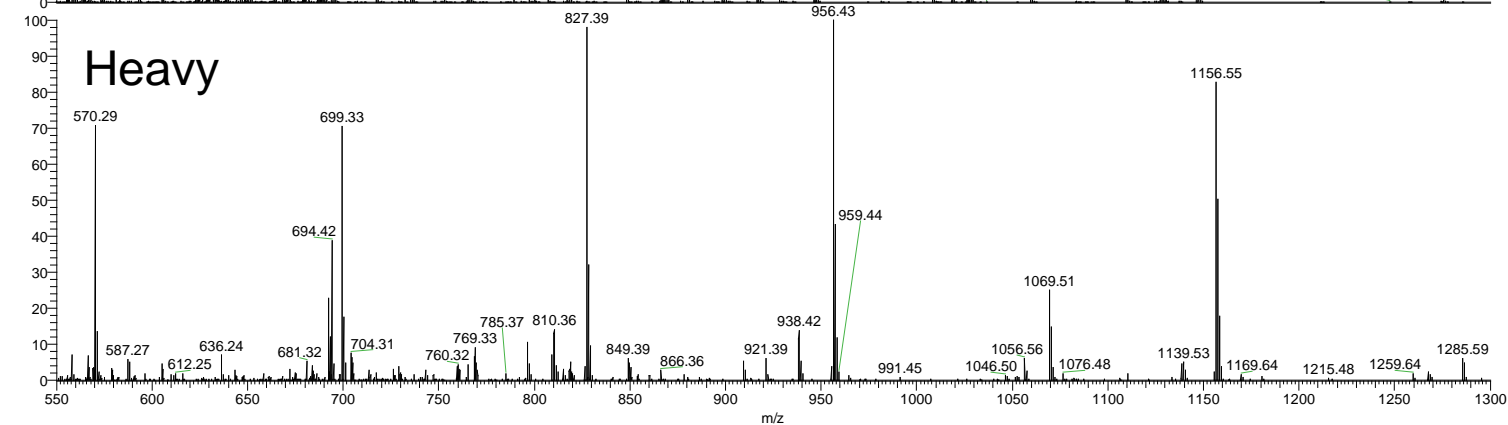

# F; BSA\_421-433; LGEYGFQNALIVR

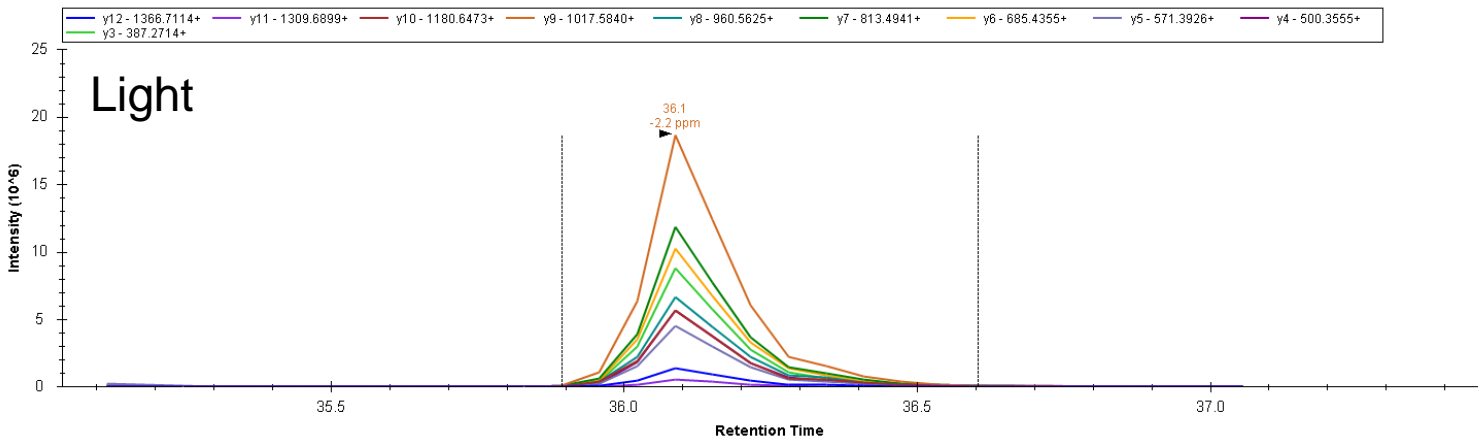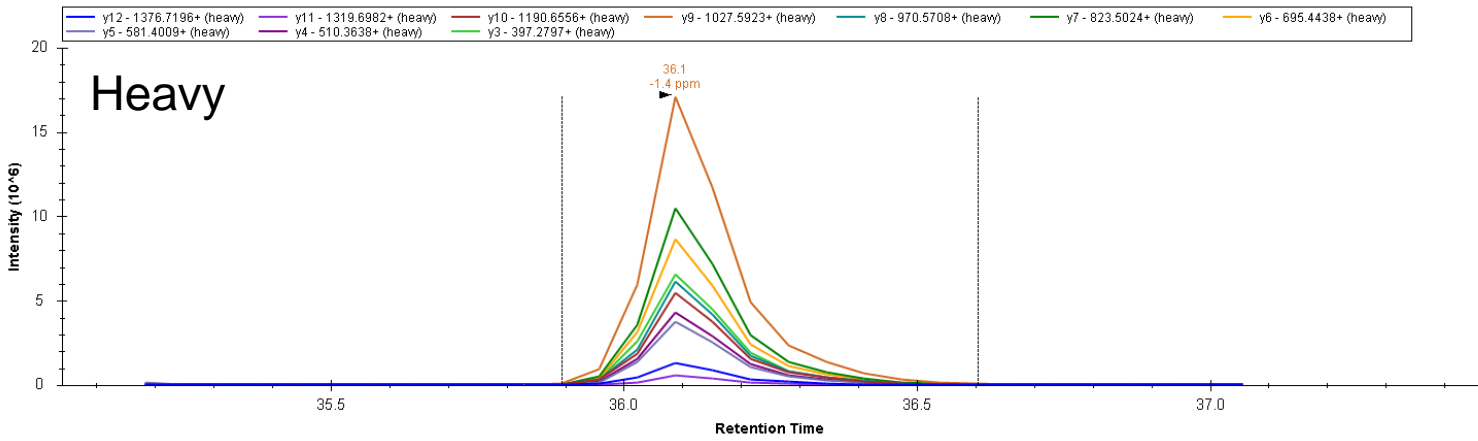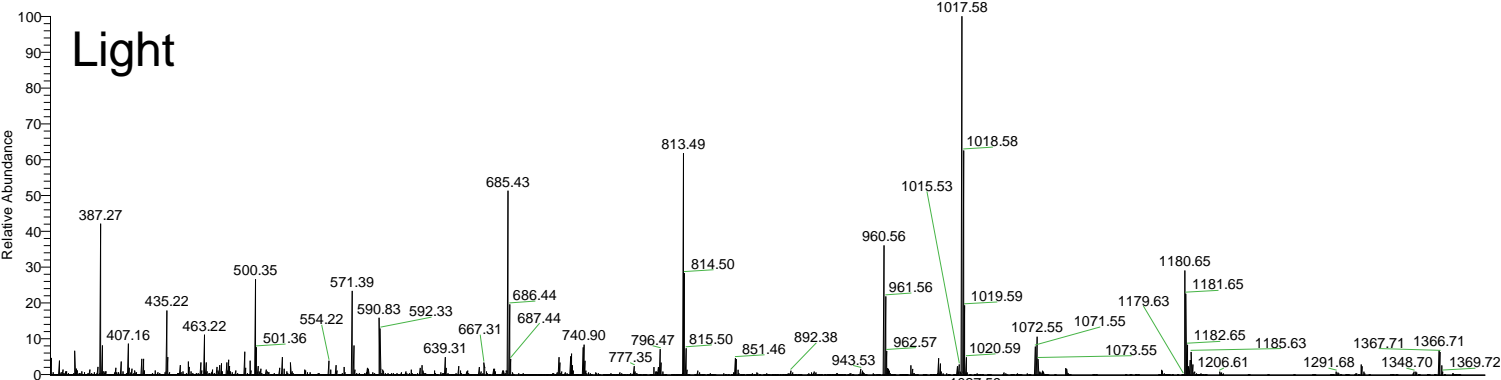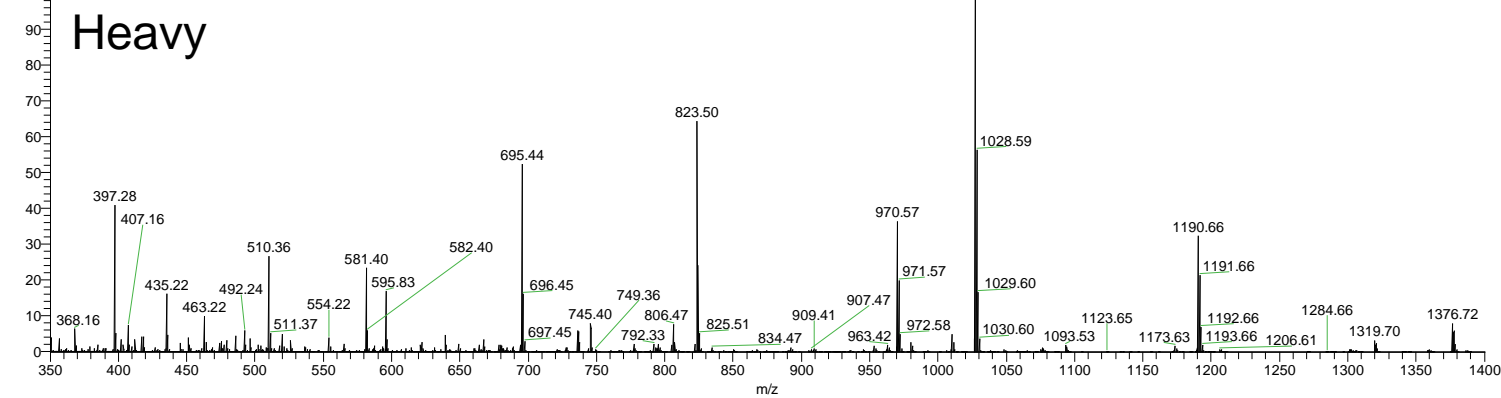



# G; C9\_146-154; VVEESELAR

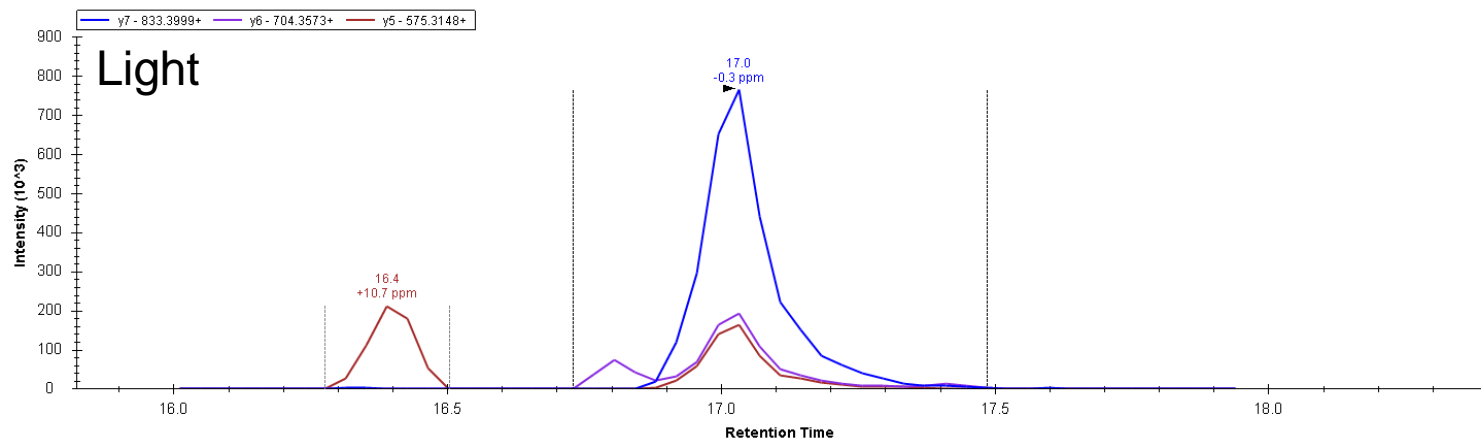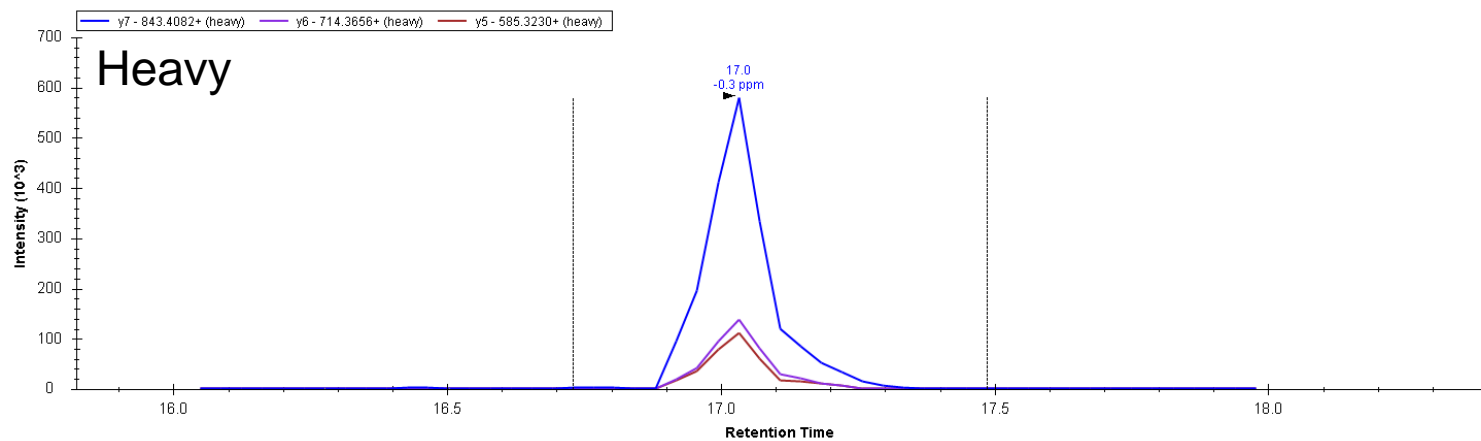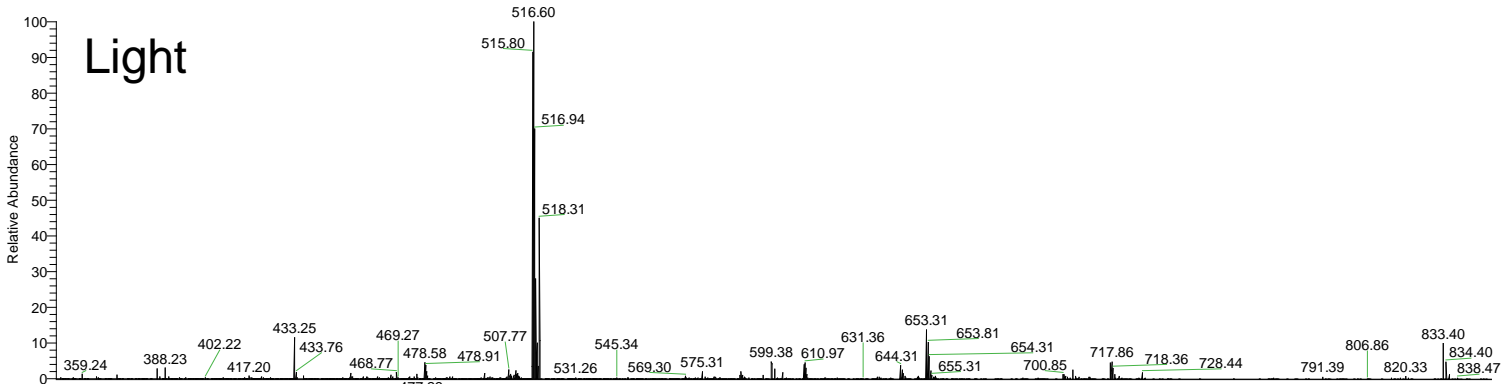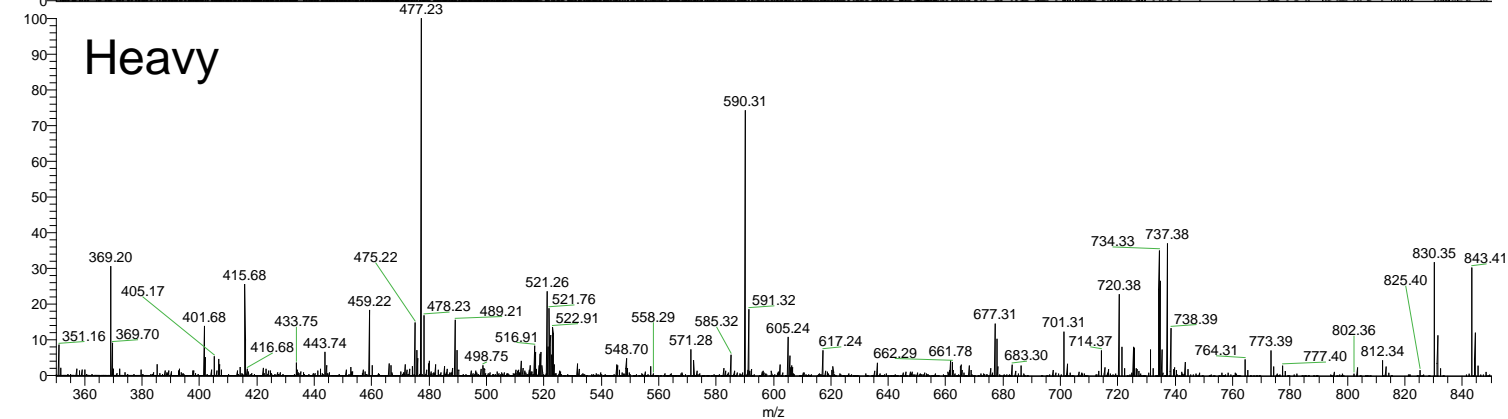

# H; C9\_186-194; DGNTLTYYR

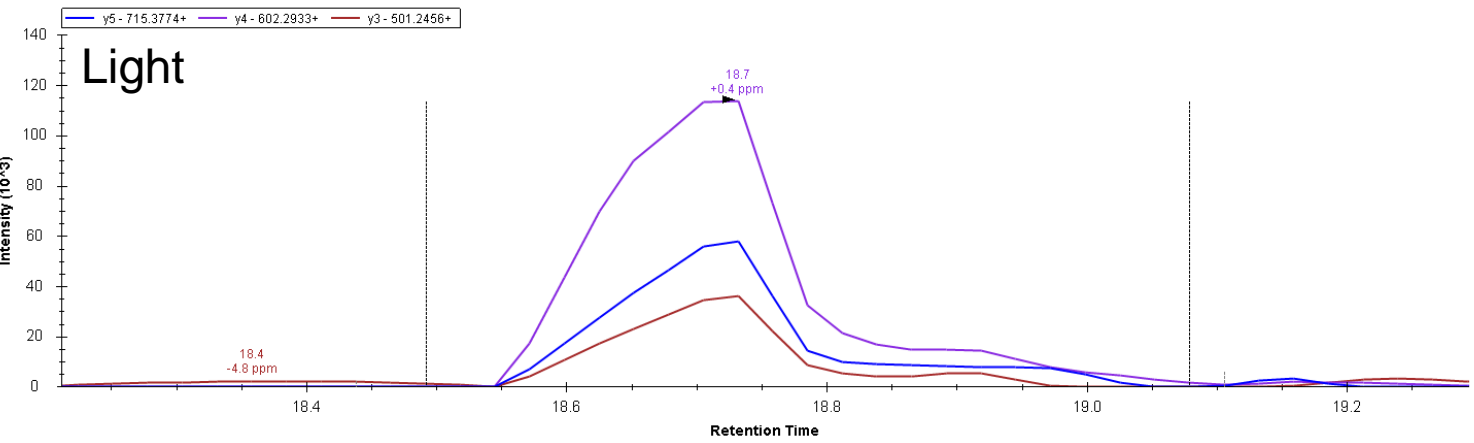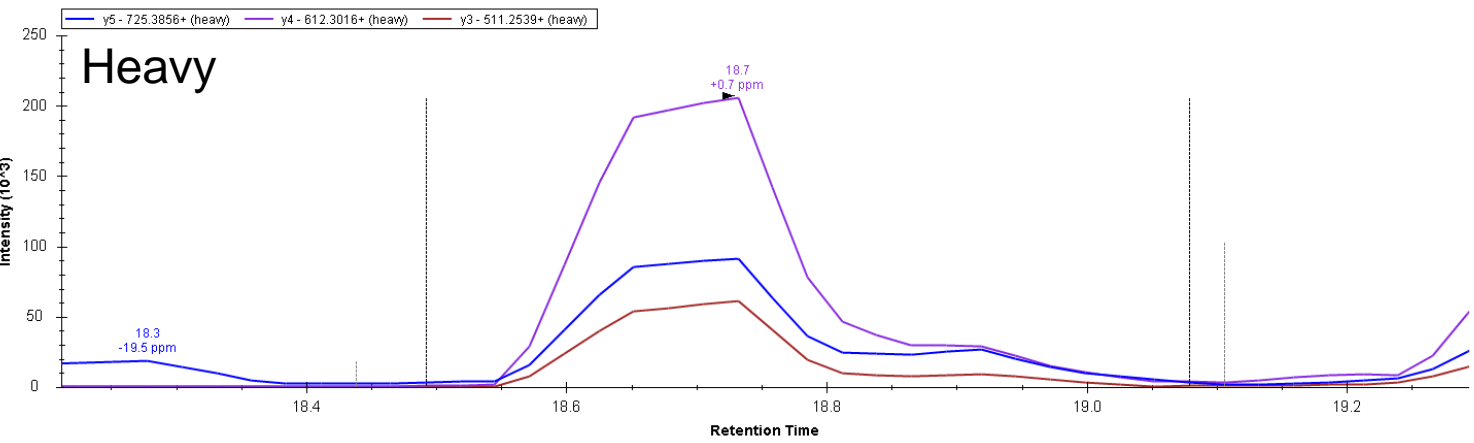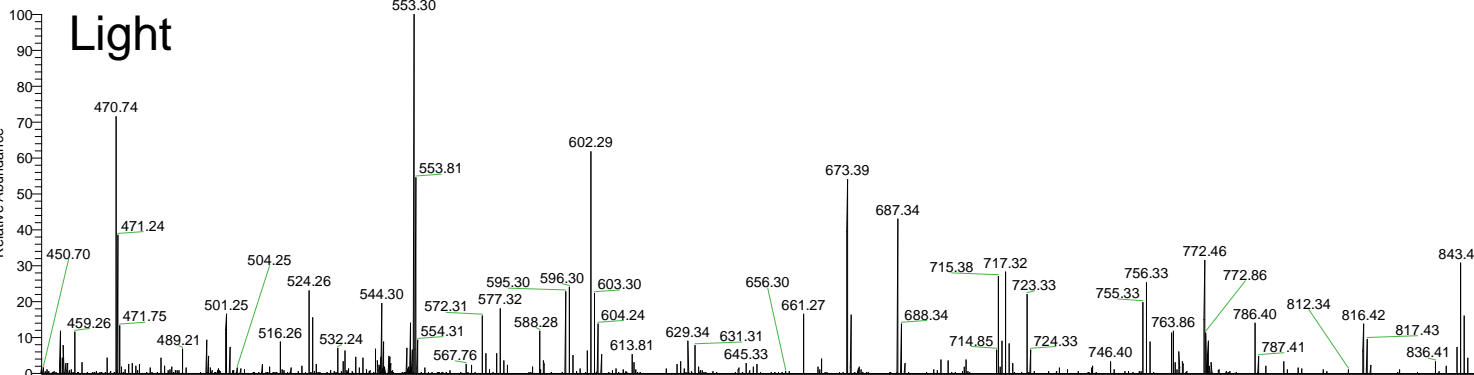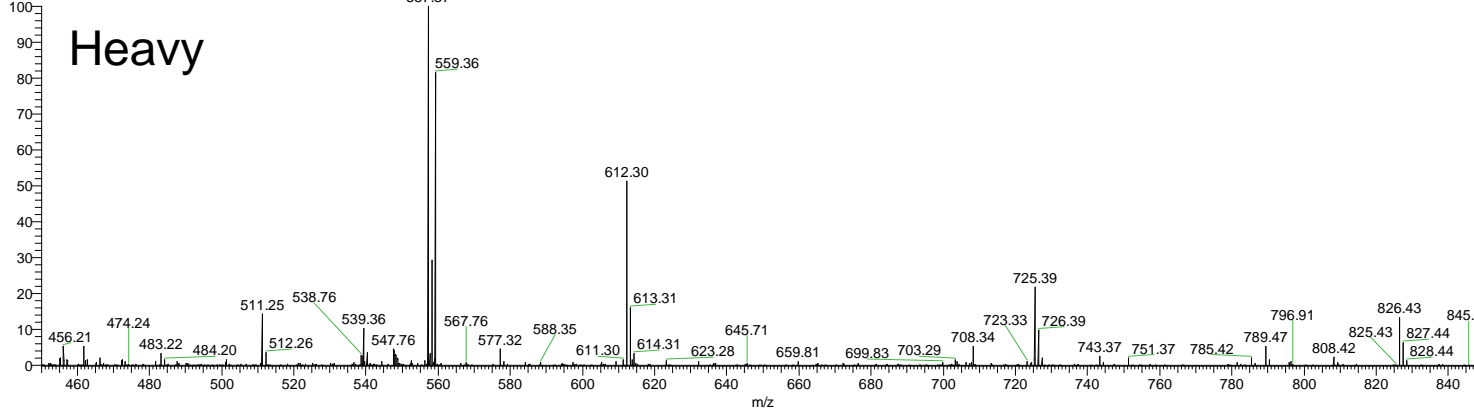

# I; C9\_232-242; TSNFNAISLK

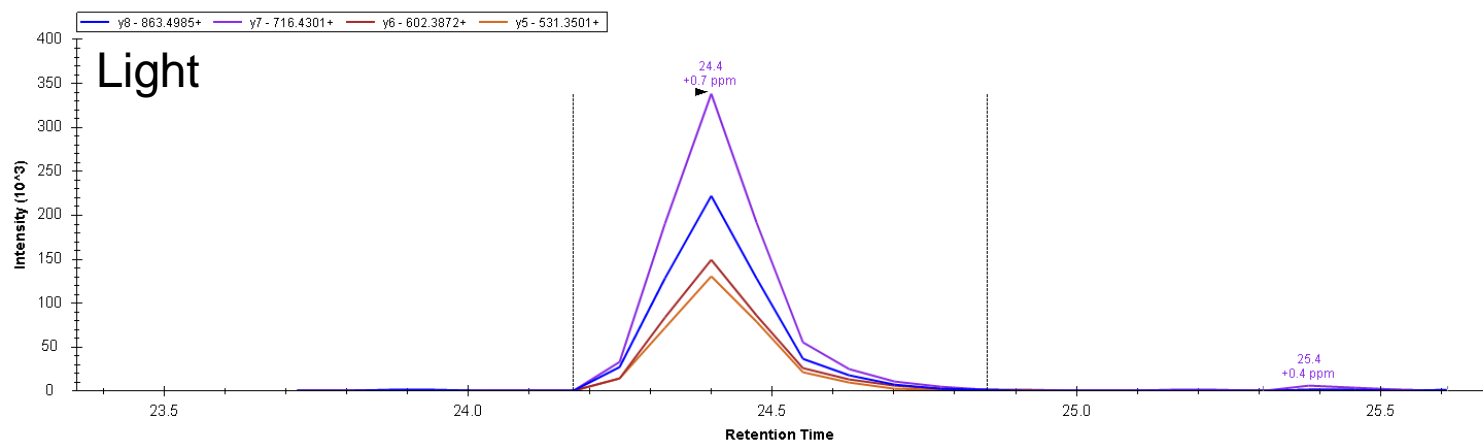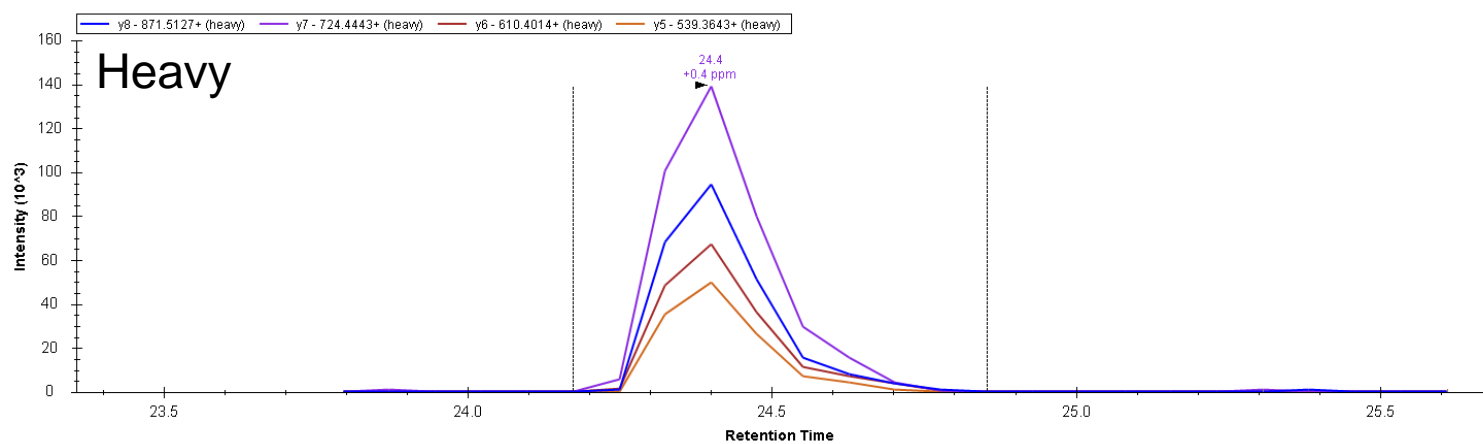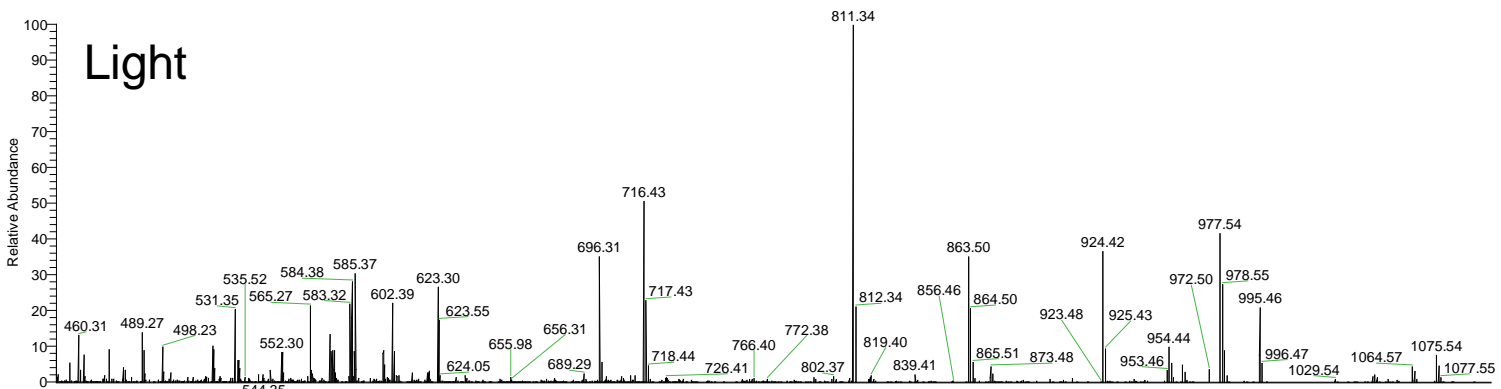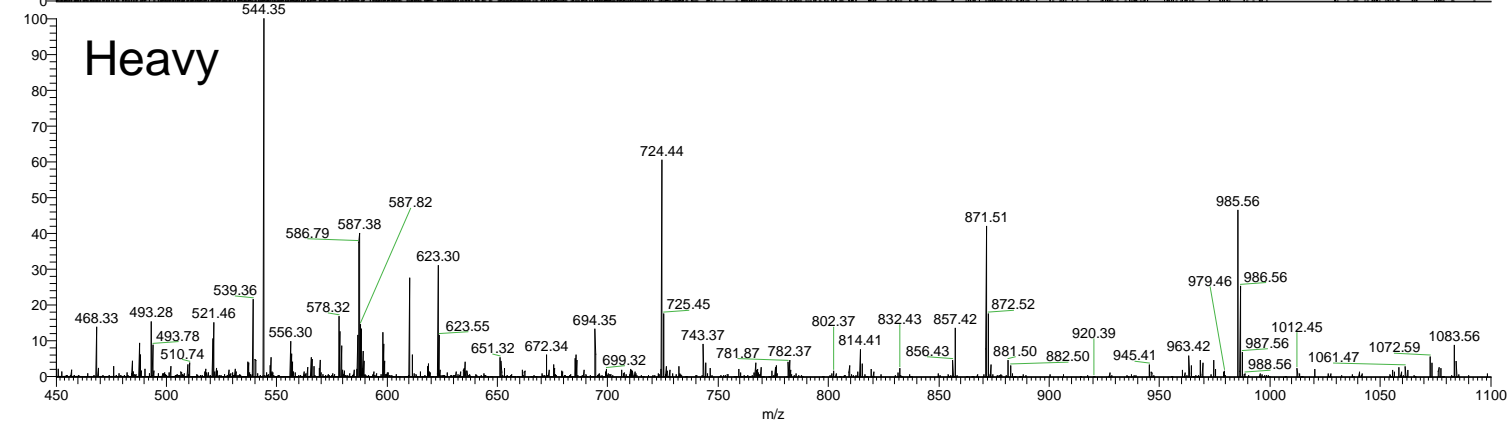

# J; C9\_473-483; LSPIYNLVPVK

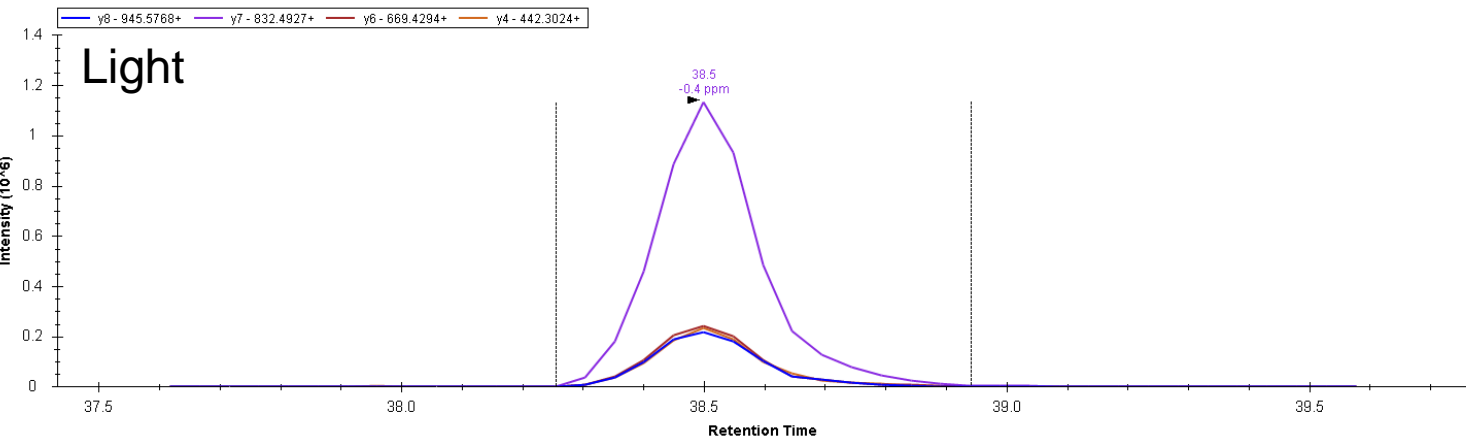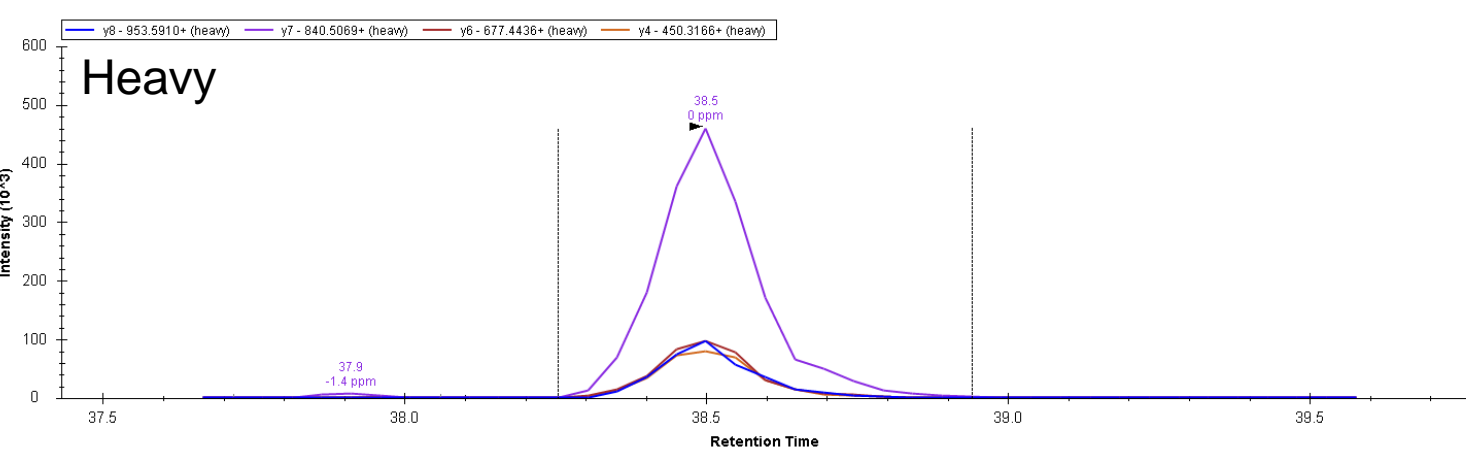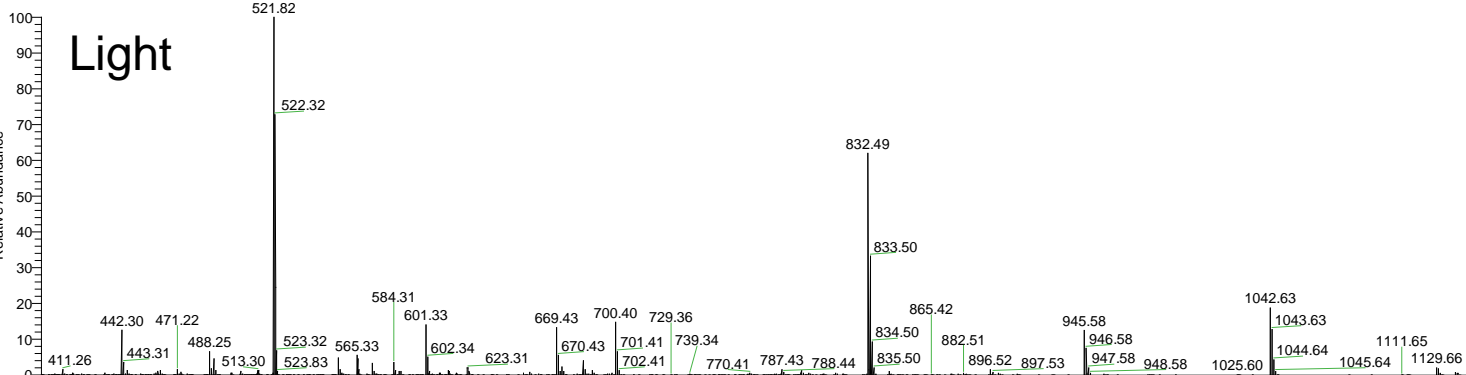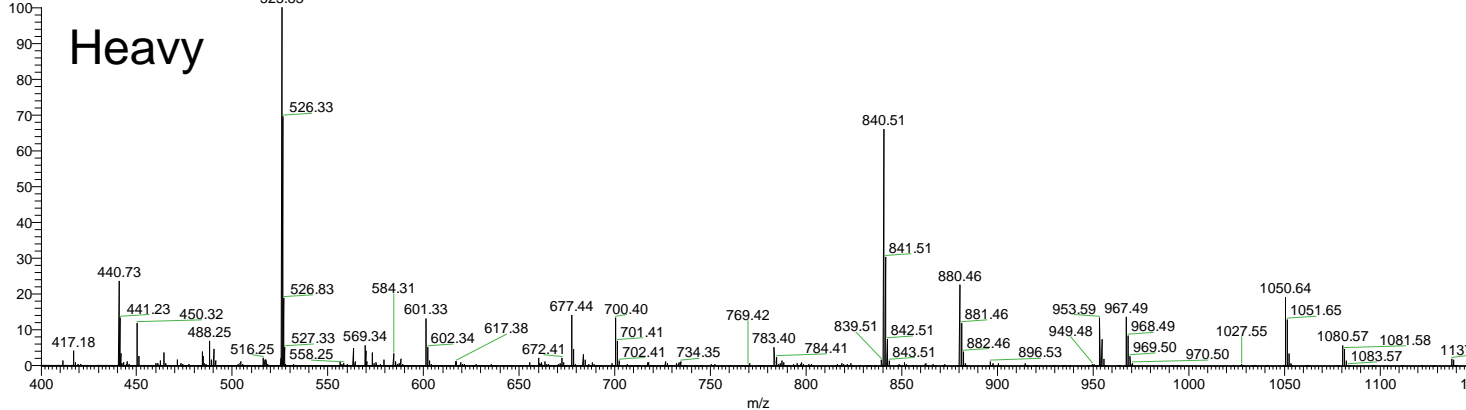

# K; C9\_497-508; AIEDYINEFSVR

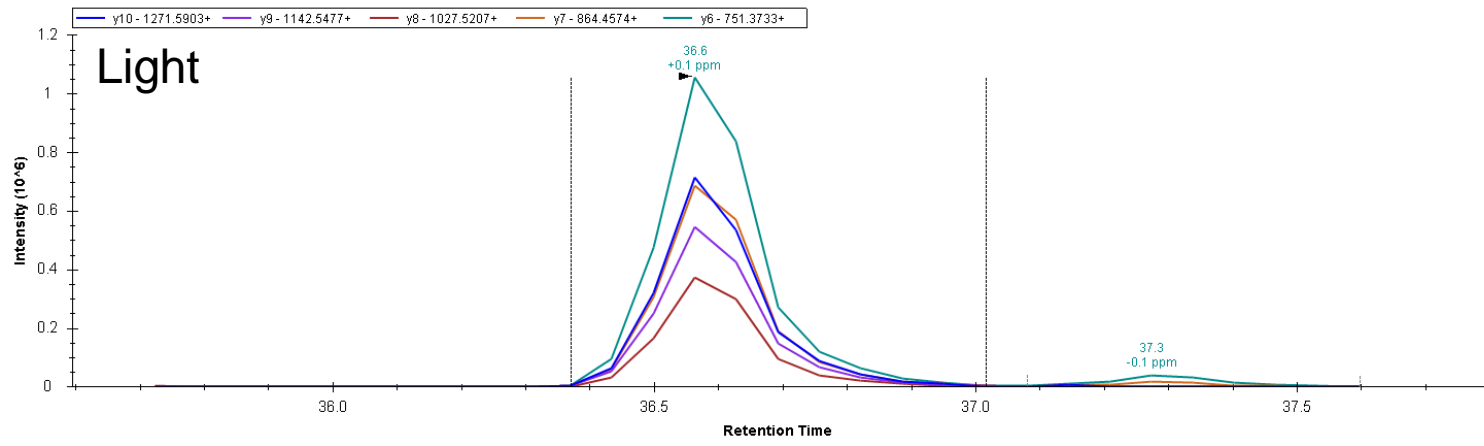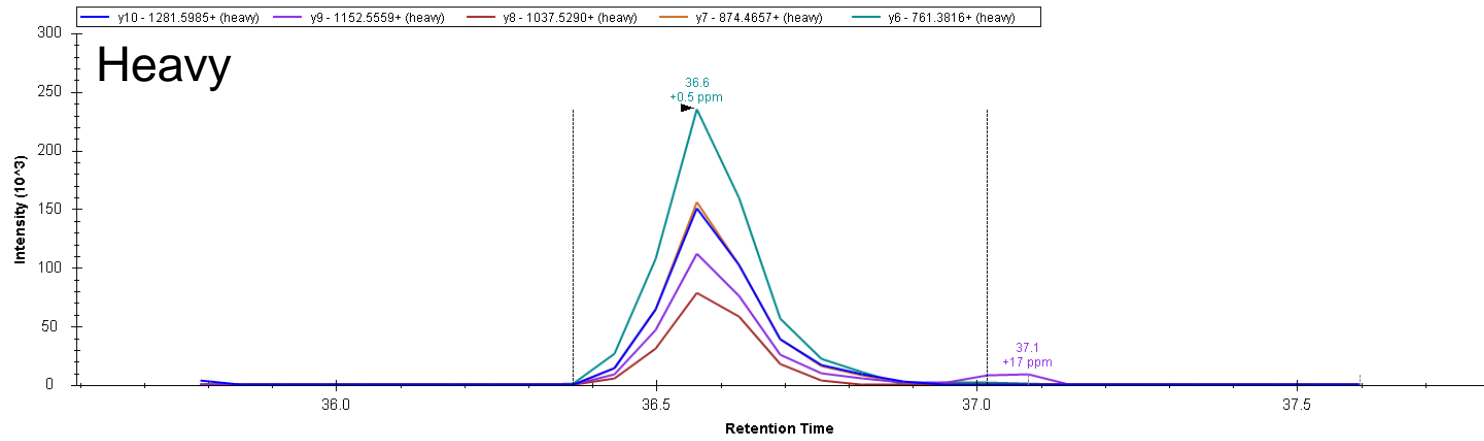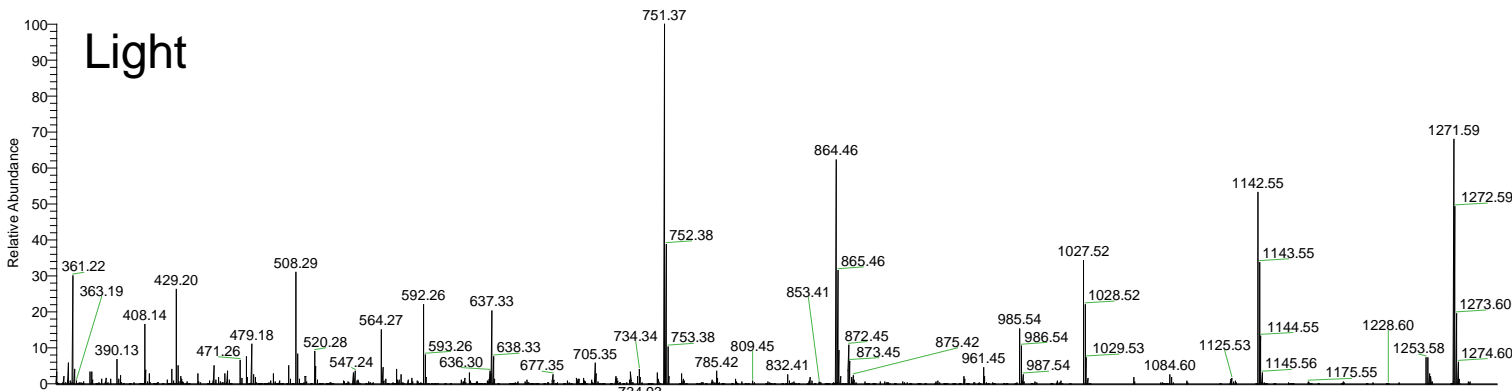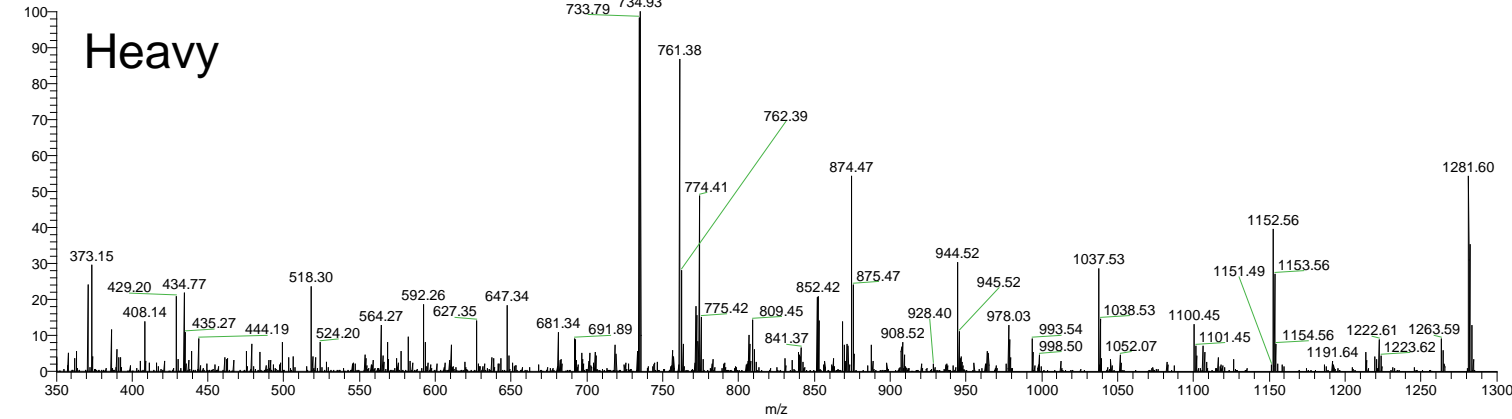

# L; CTSB\_58-71; LcGTFLGGPKPPQR

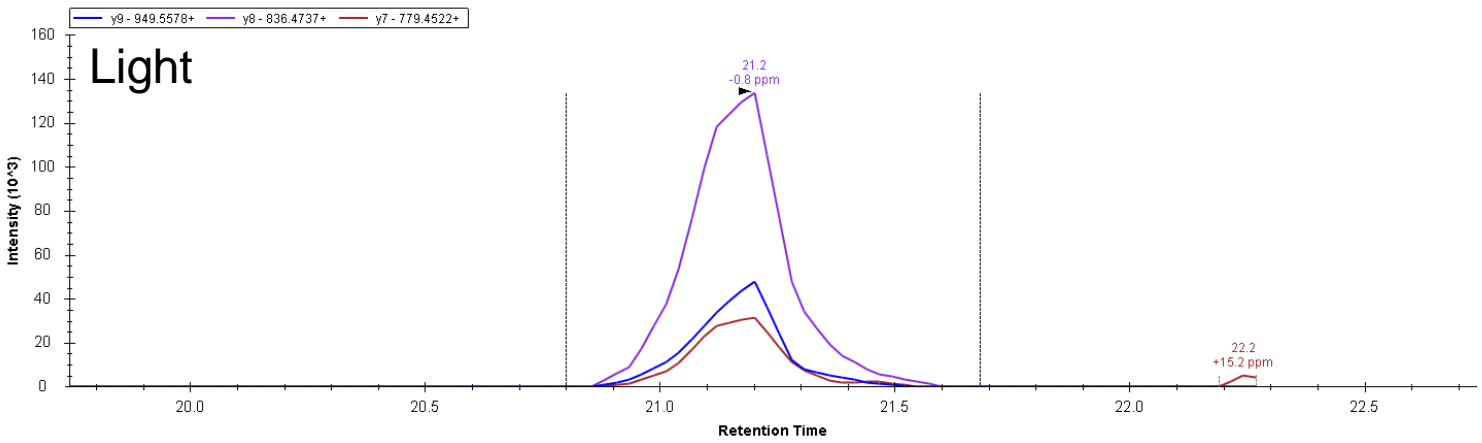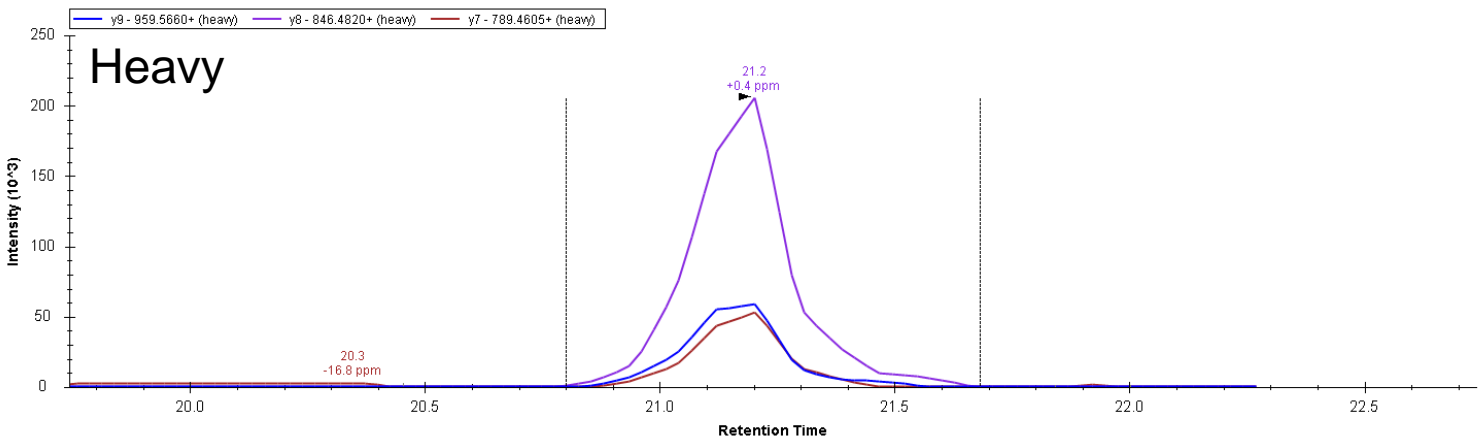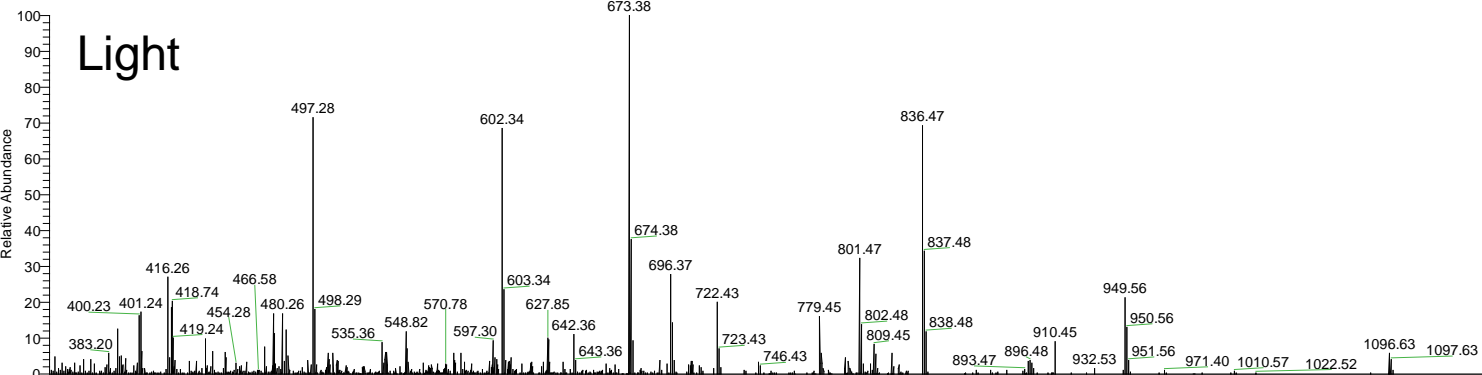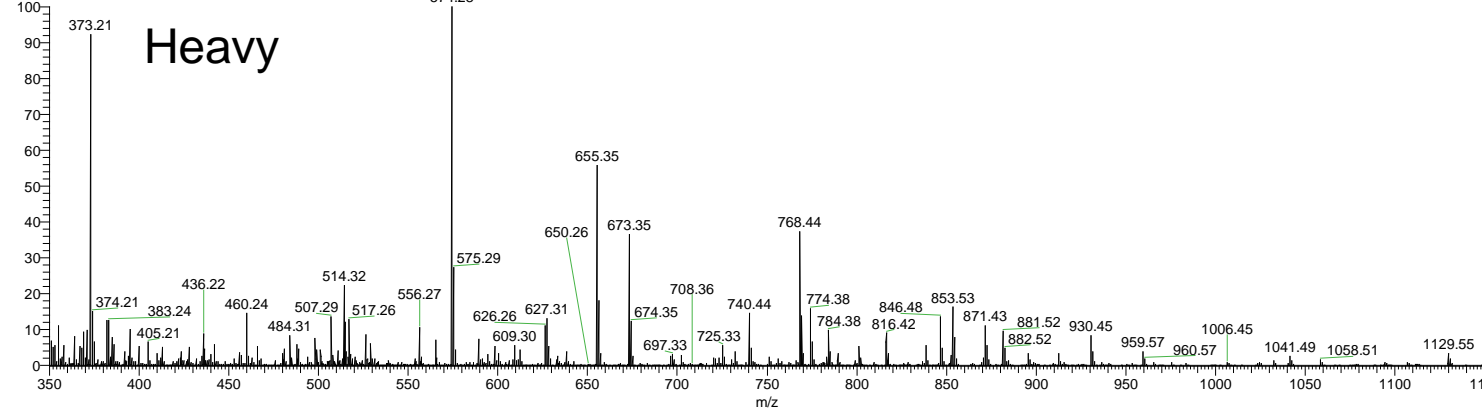

# M; CTSB\_80-87; LPASFDAR

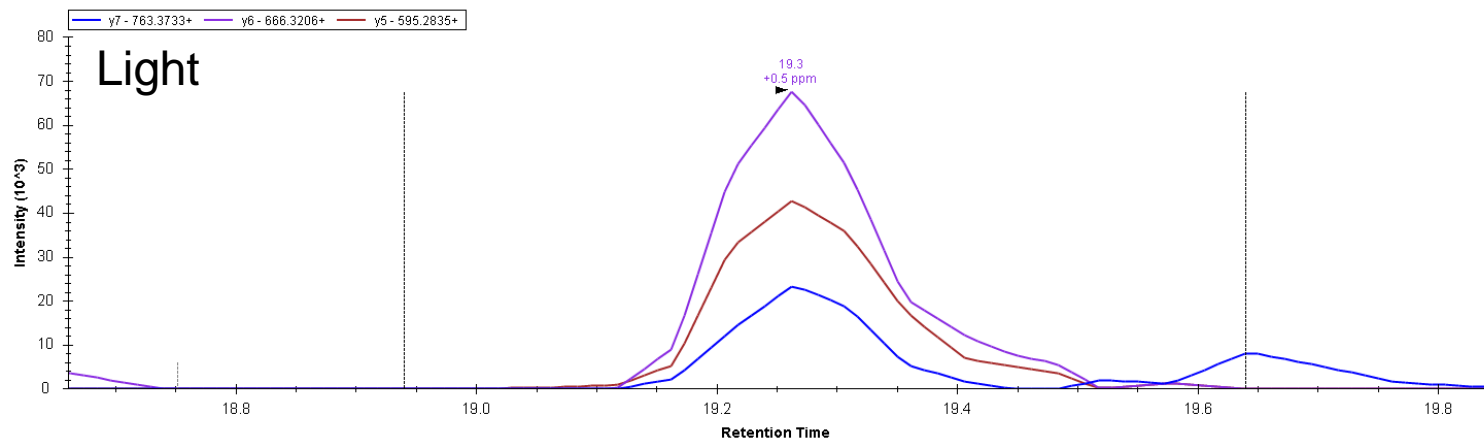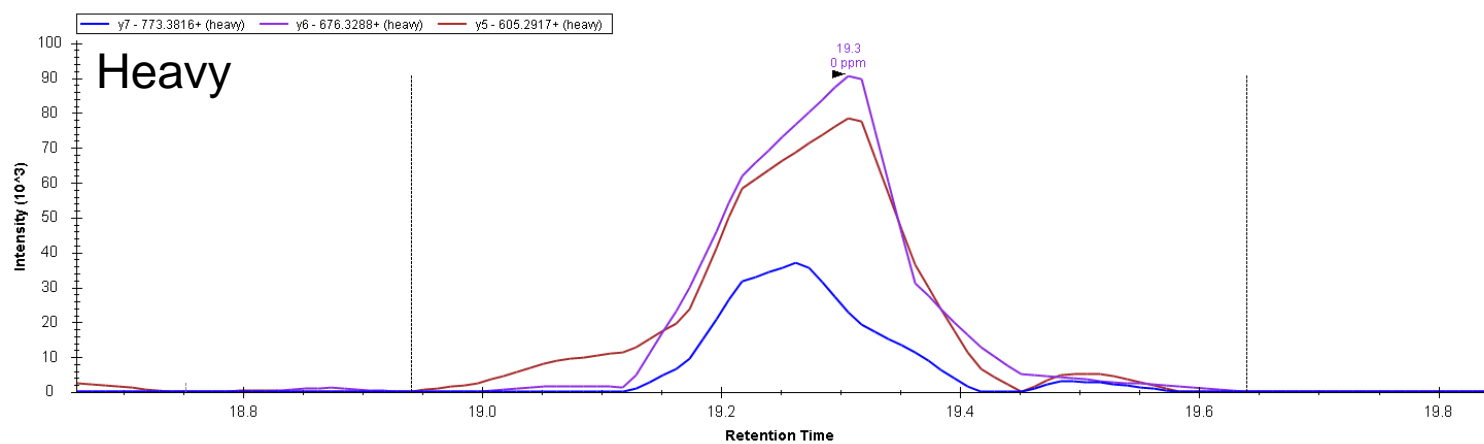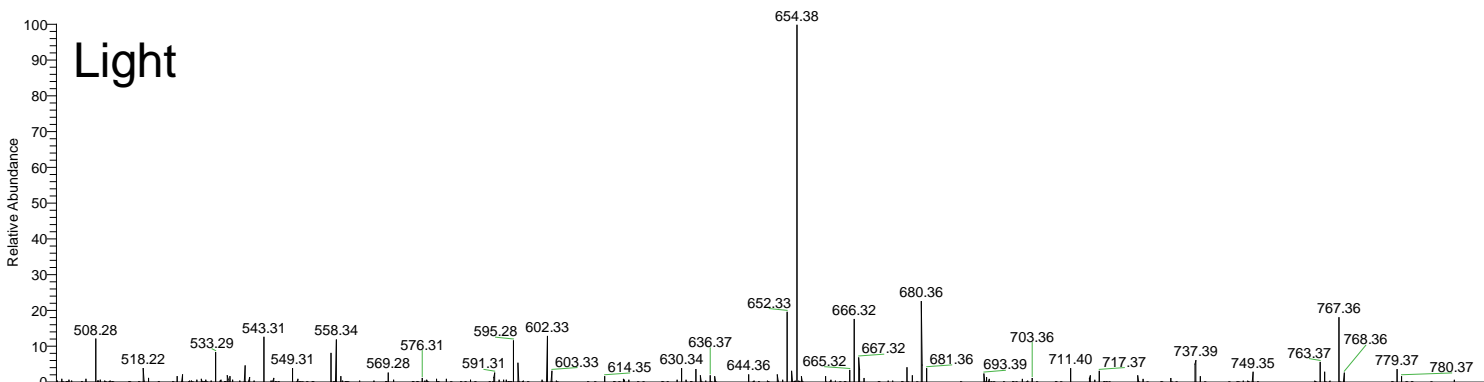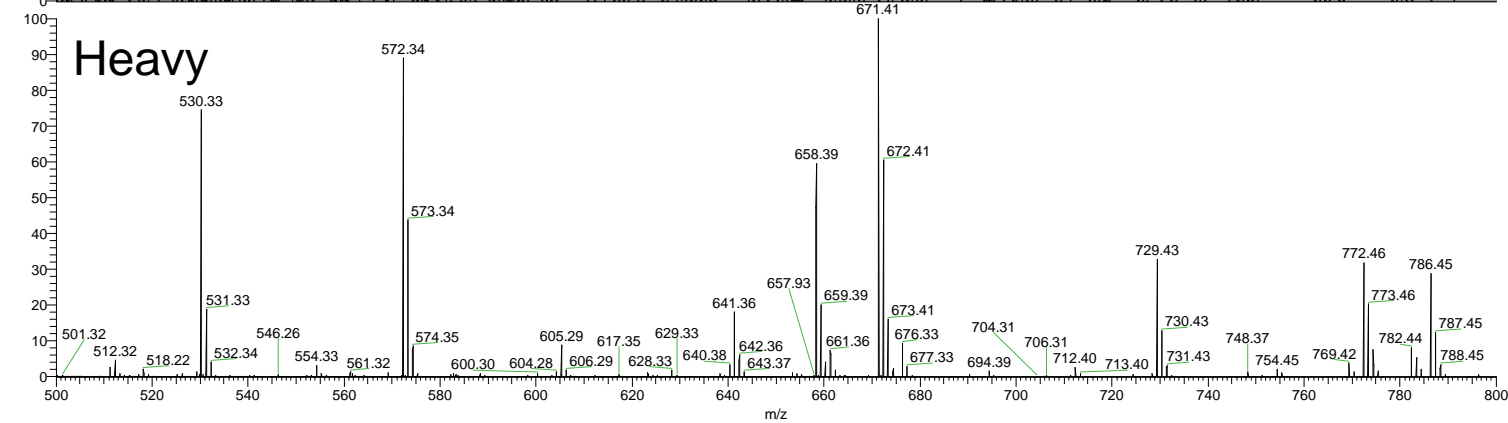

# N; CTSB\_210-220; IcEPGYSPTYK

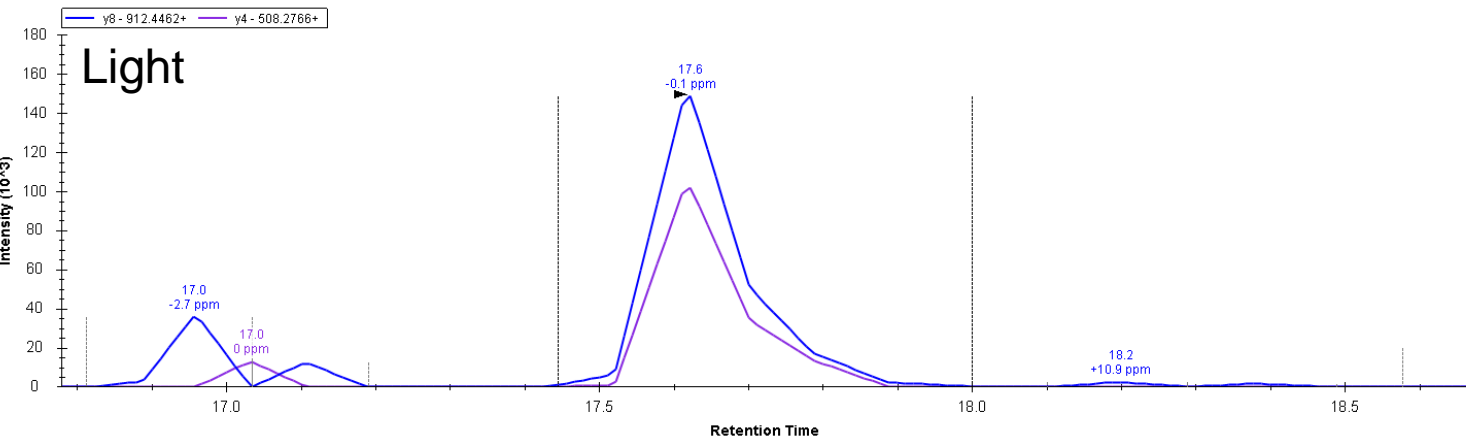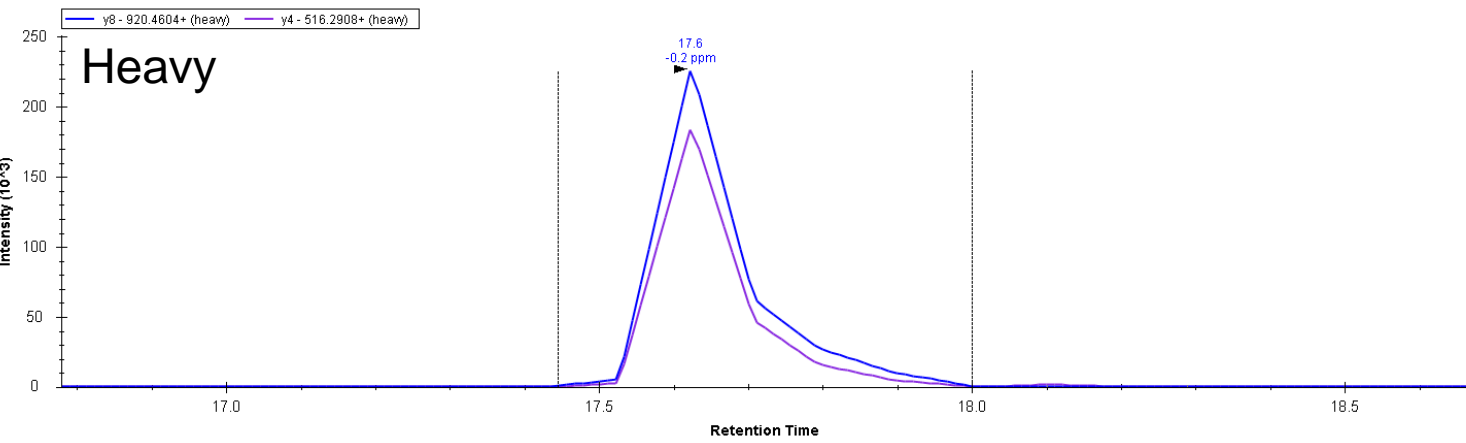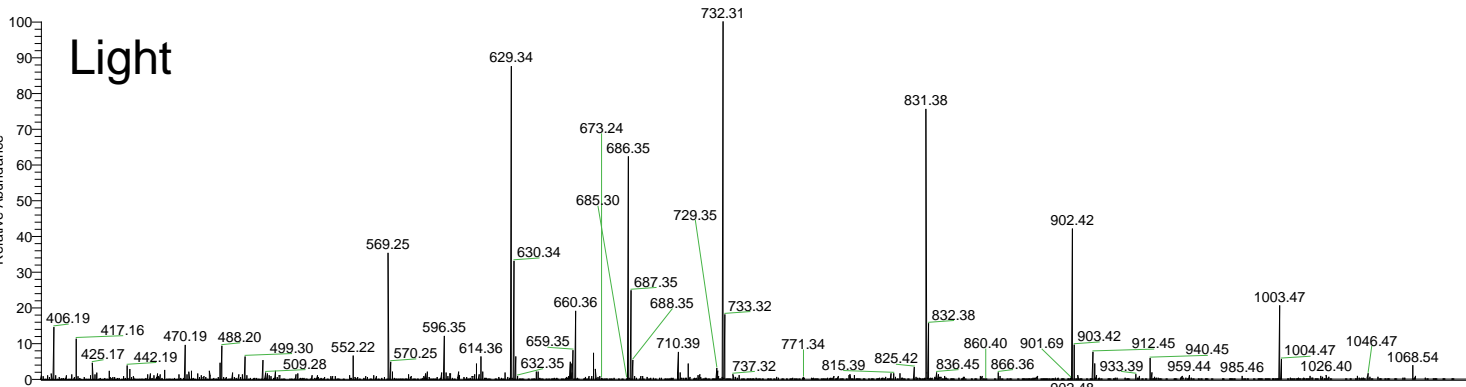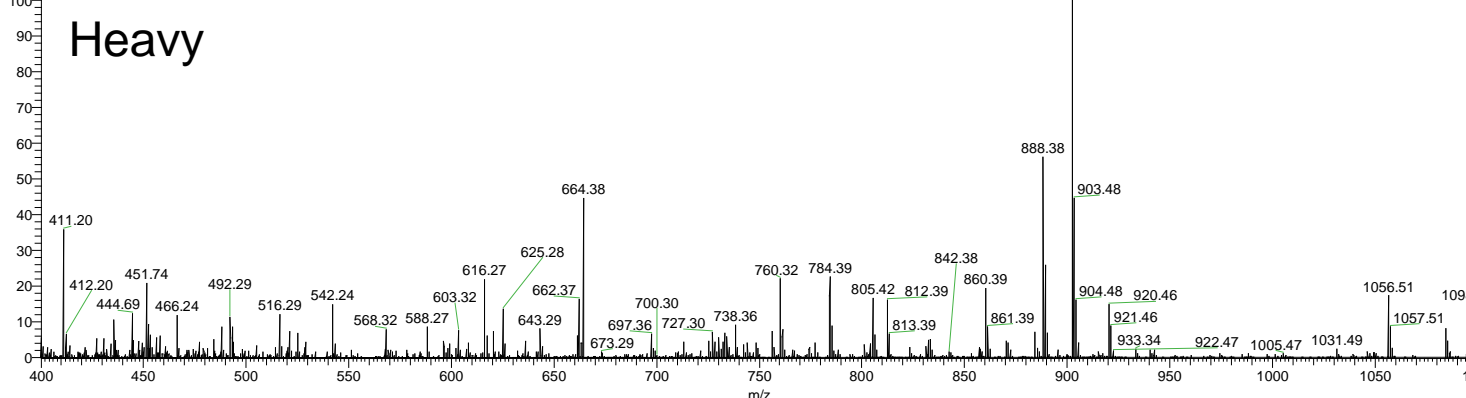



# O; CTSD\_55-72; YSQAVPAVTEGPIPEVLK

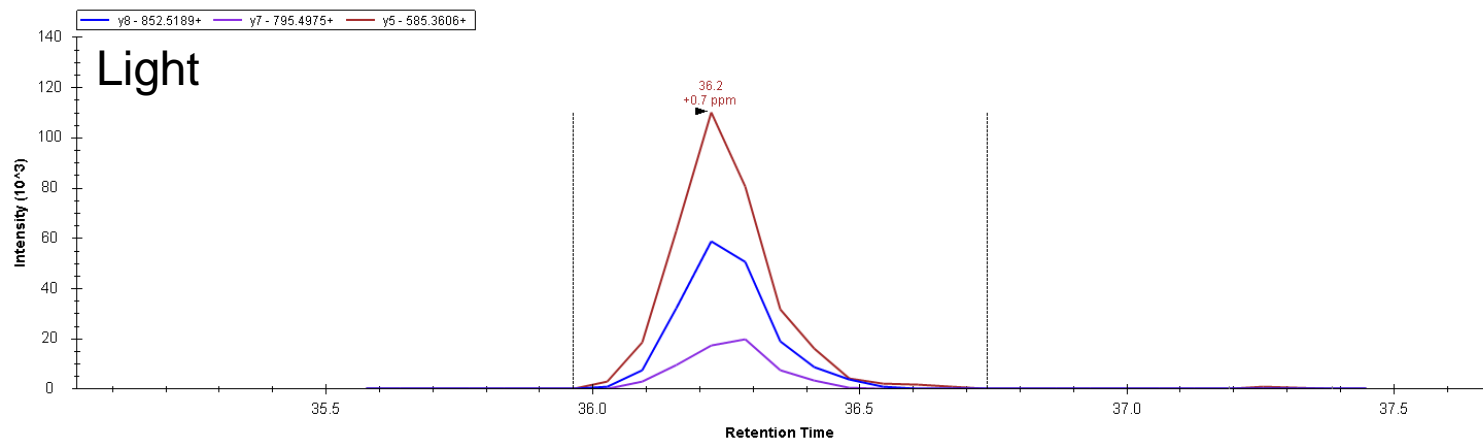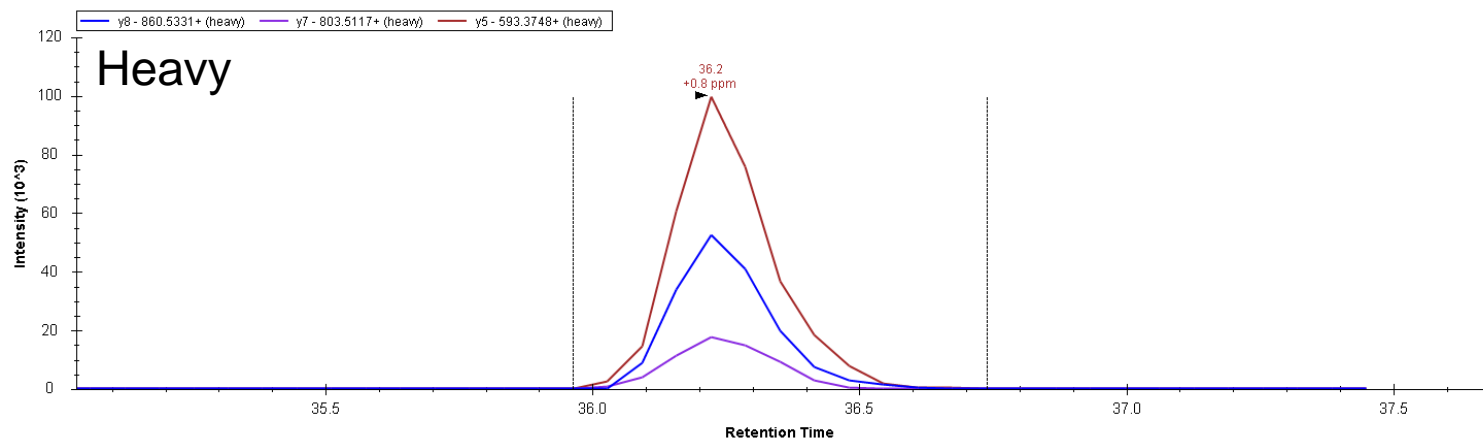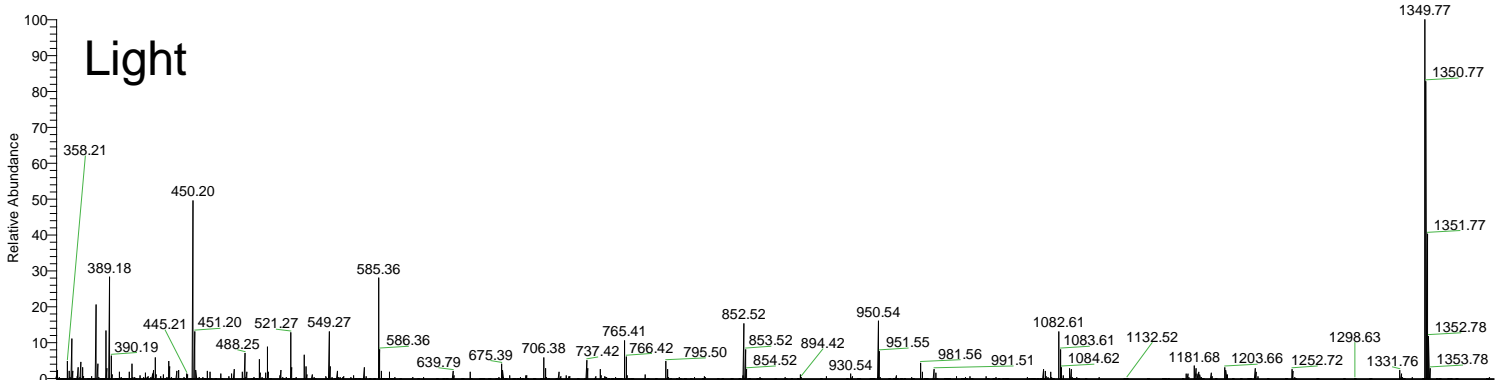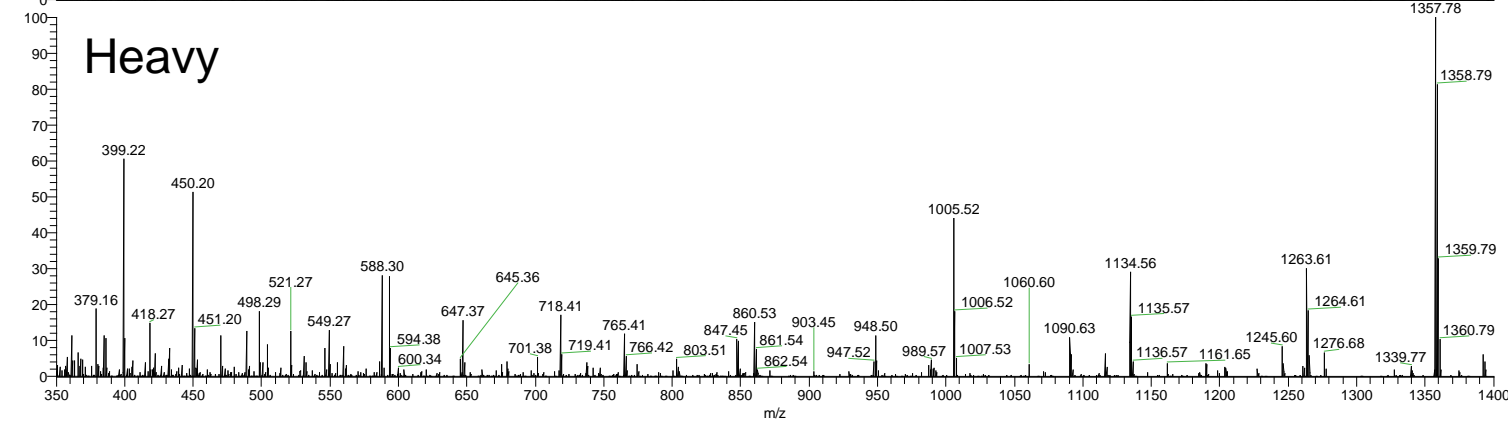

# P; CTSD\_112-122; LLDIAcWIHHK

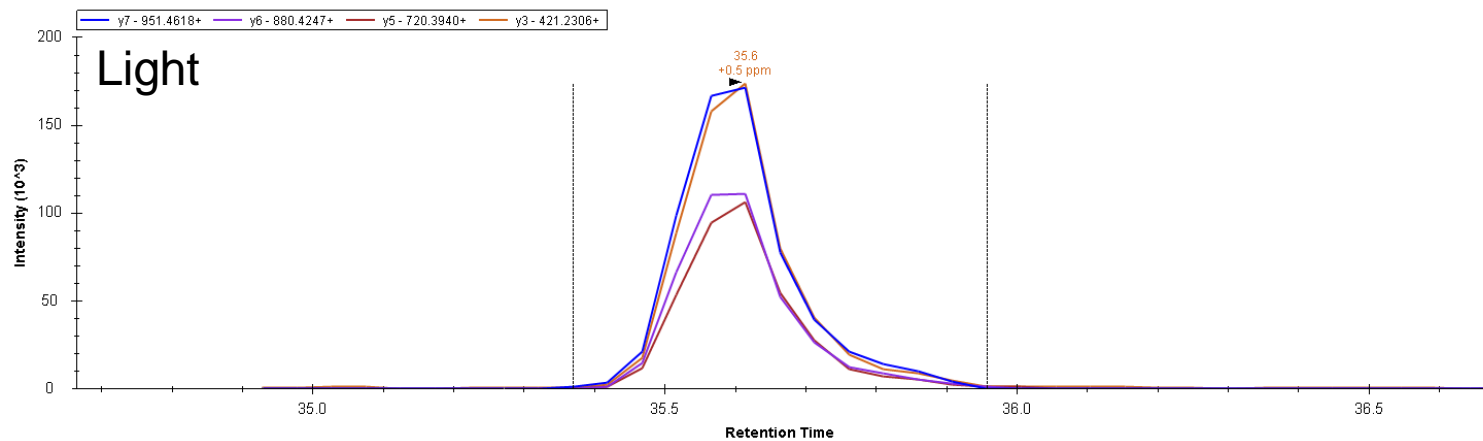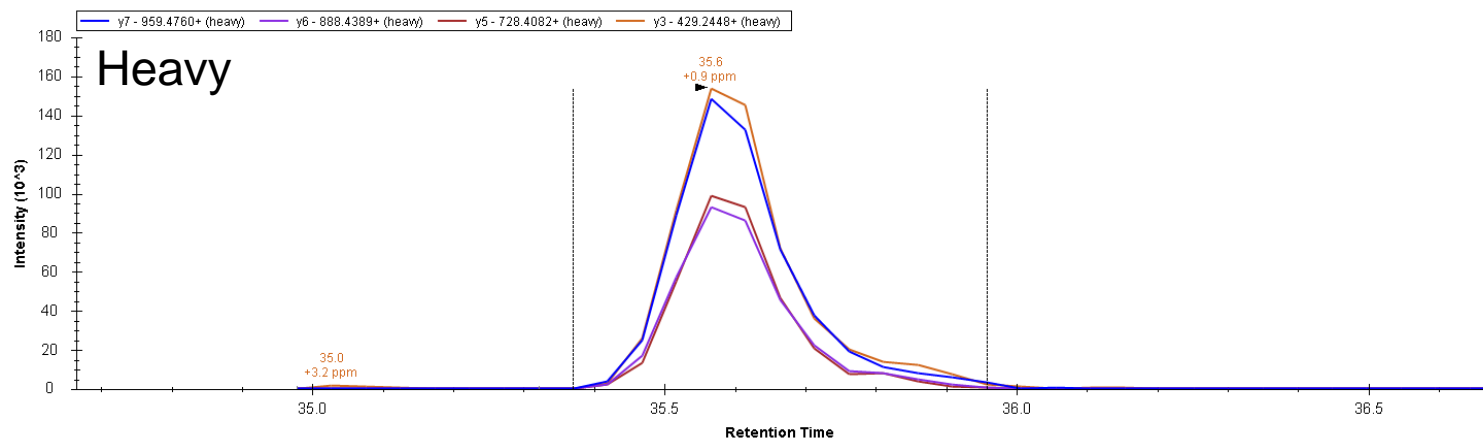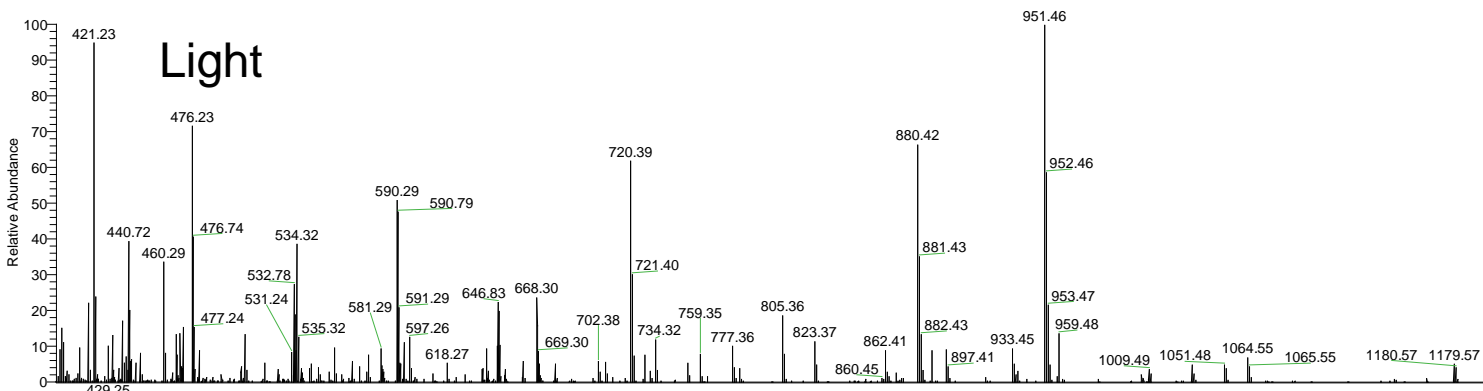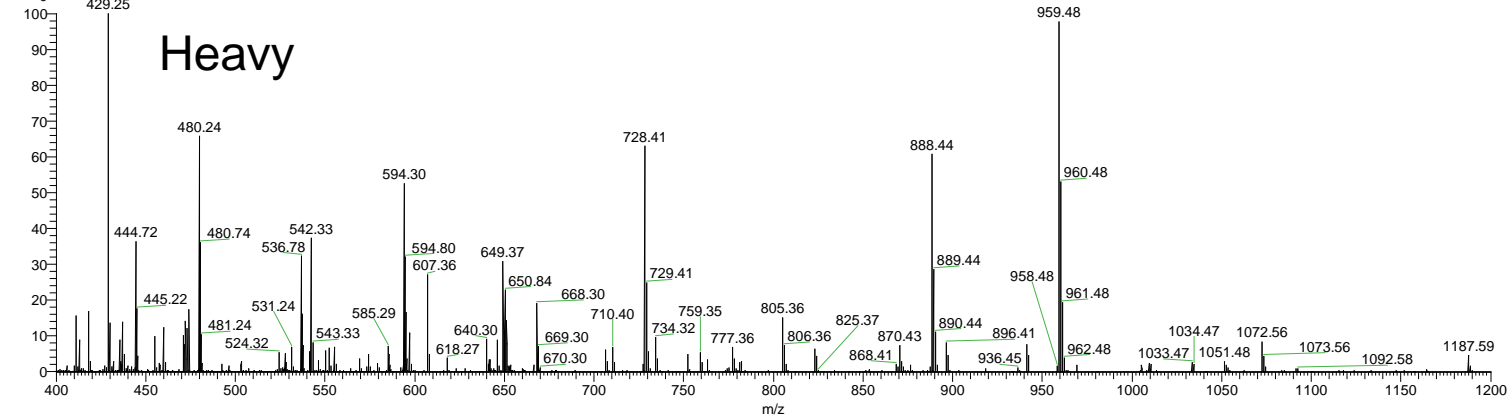

# Q; CTSD\_349-357; LSPEDYTLK

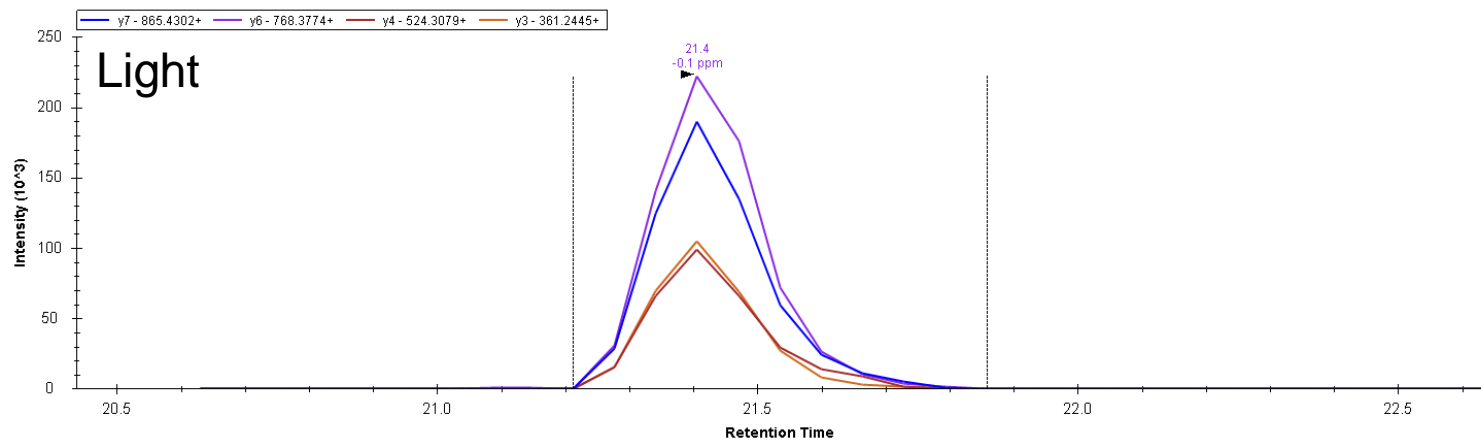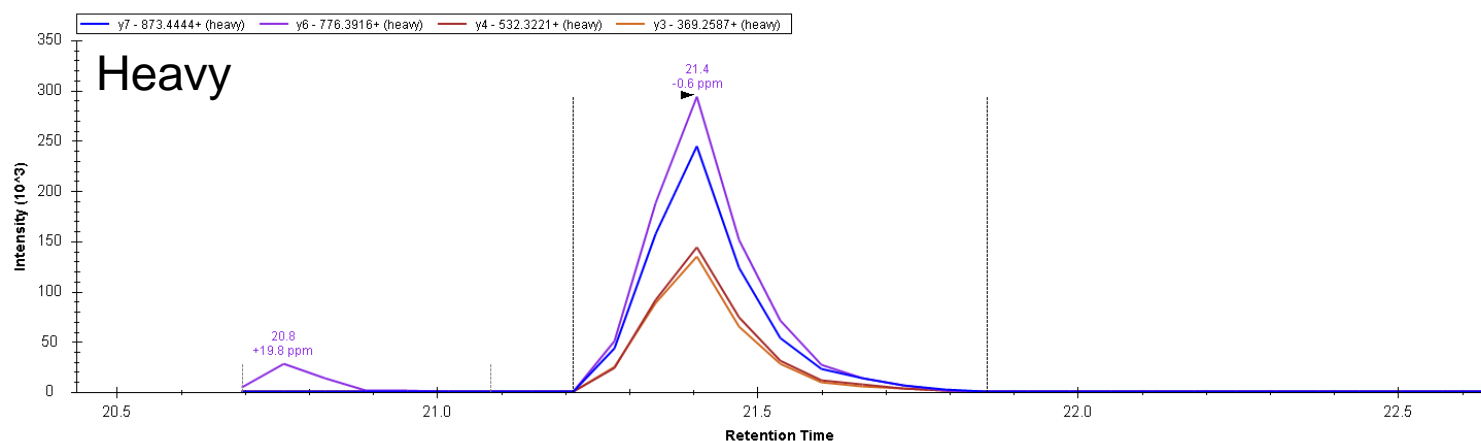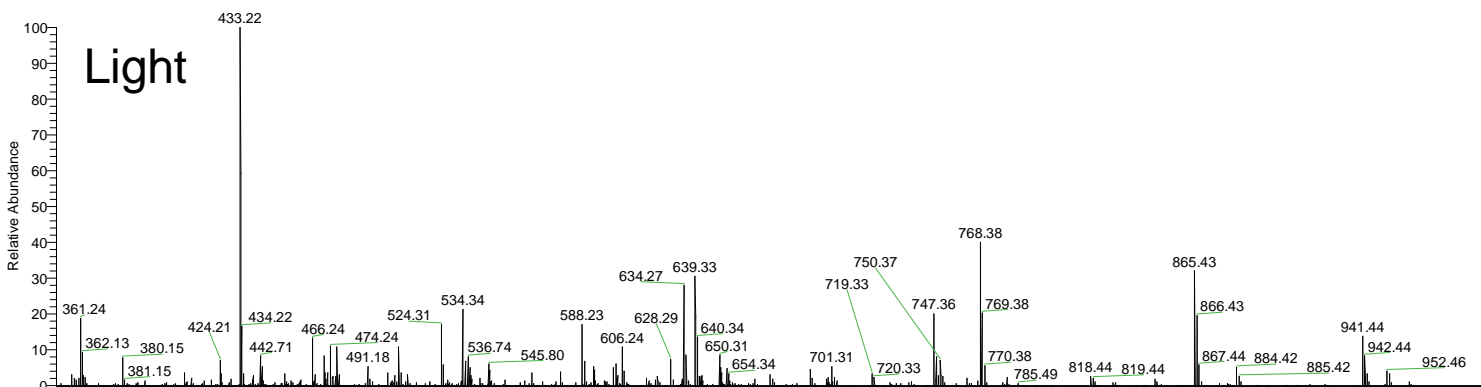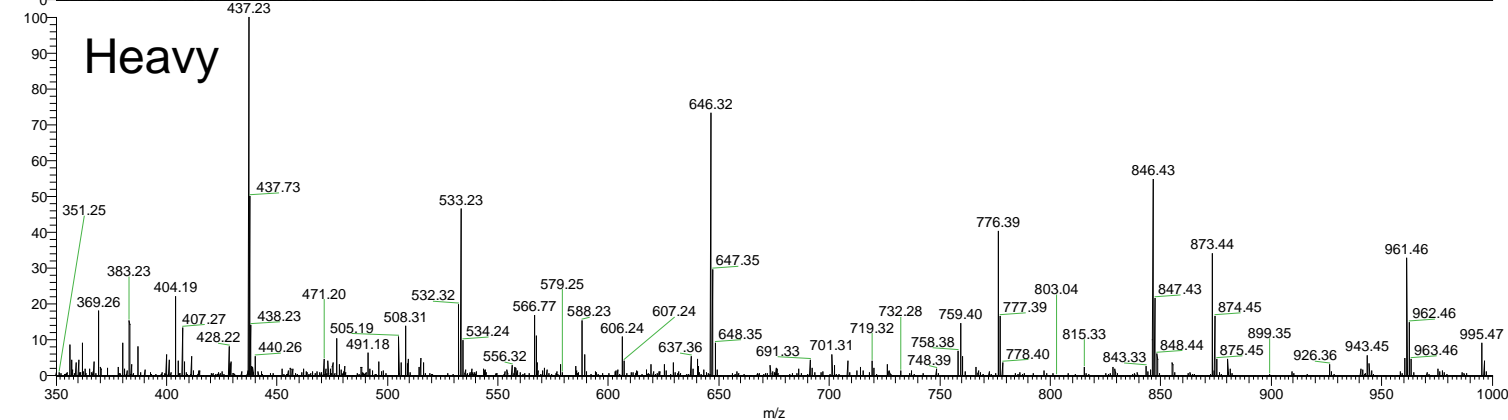

# R; CTSF\_103-116; TLLcSFQVLDELGR

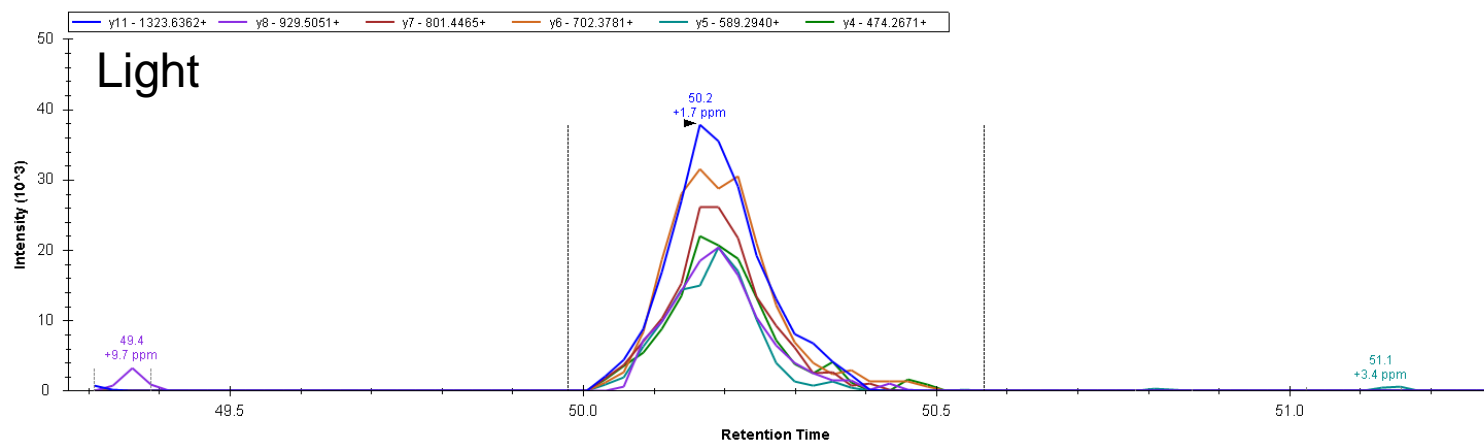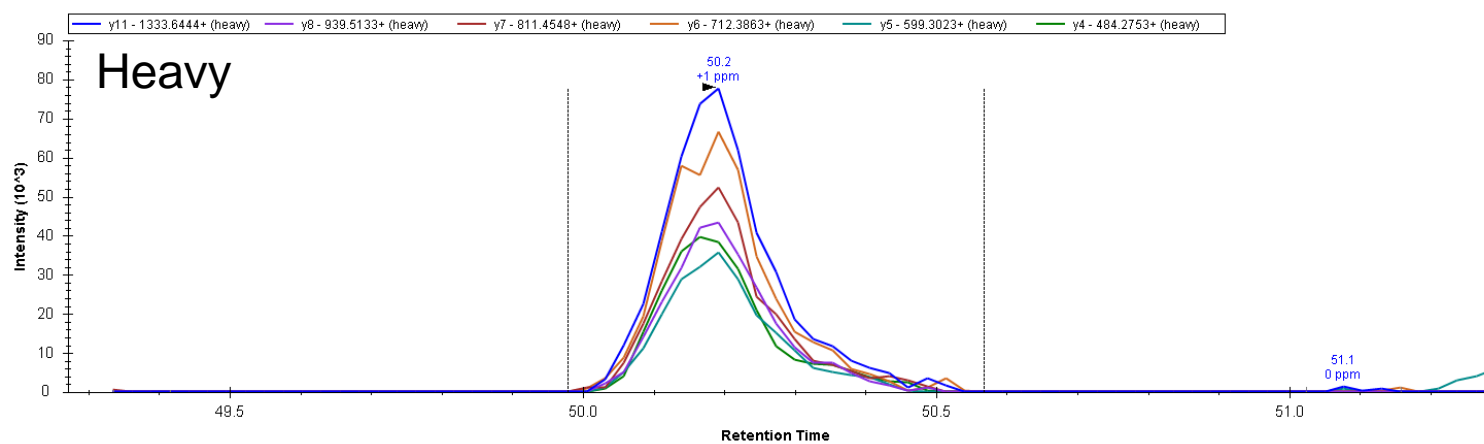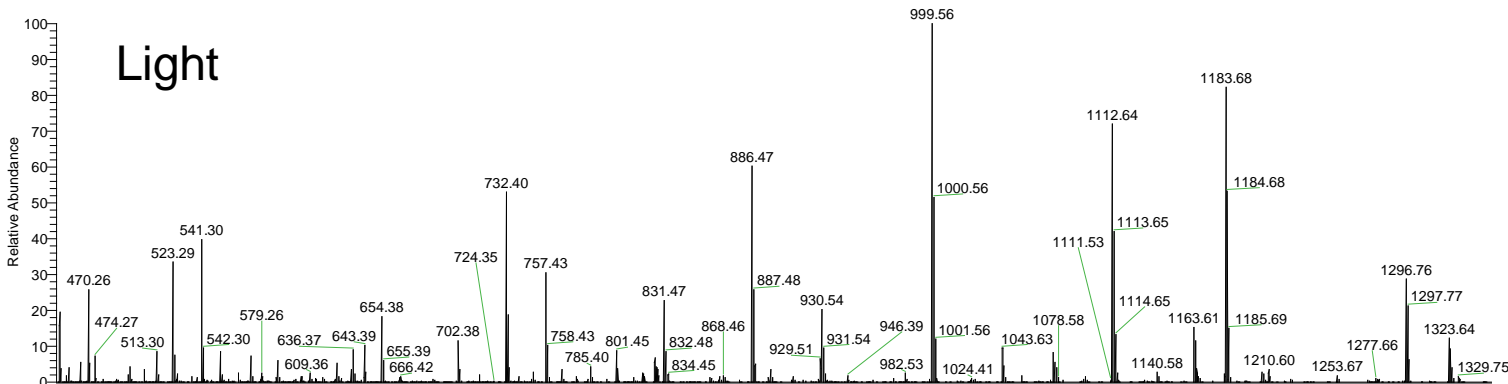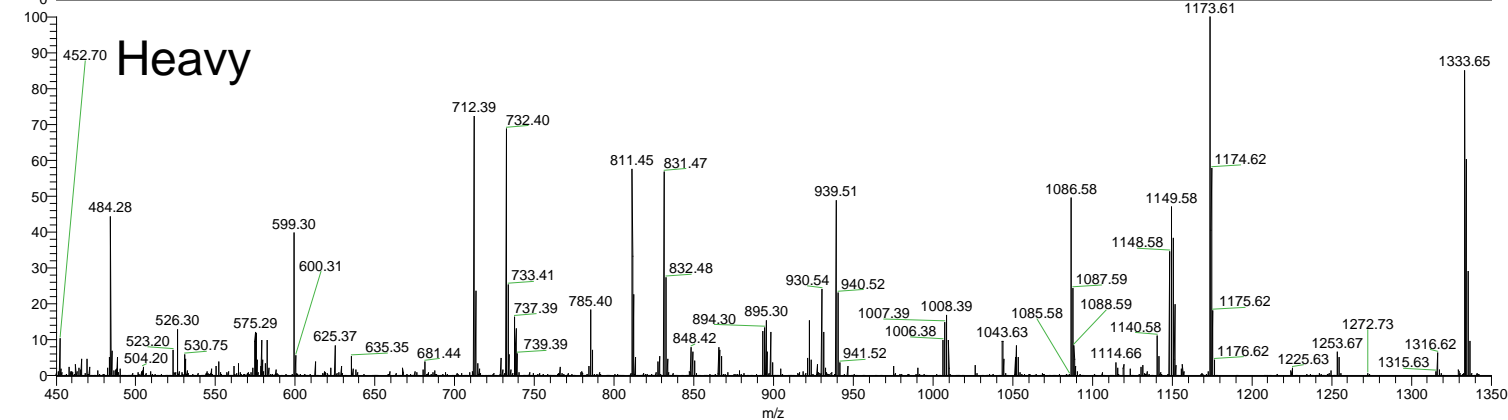

# S; CTSF\_236-245; FSDLTEEEFR

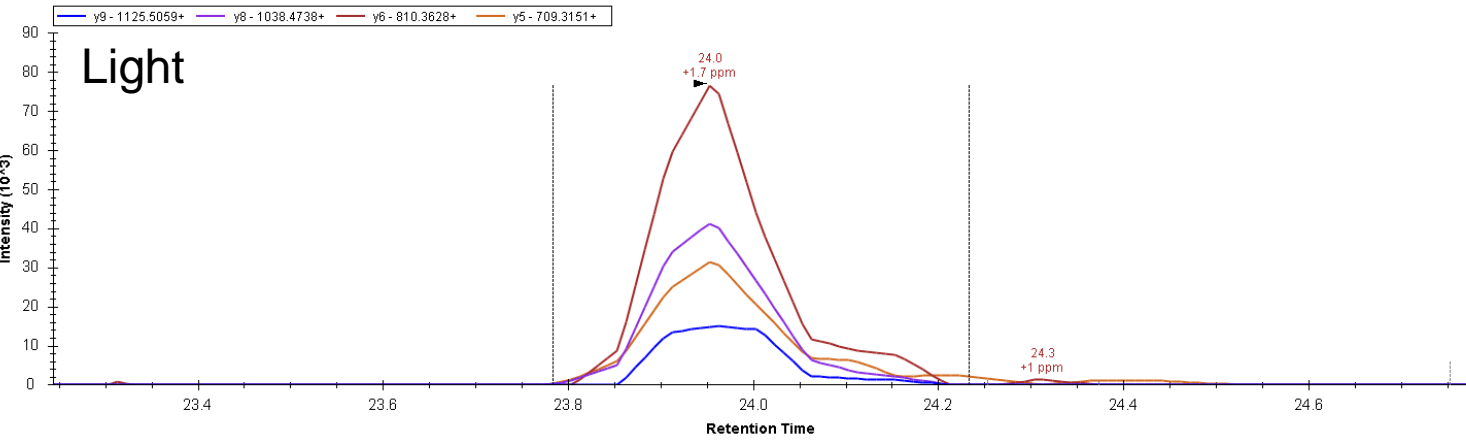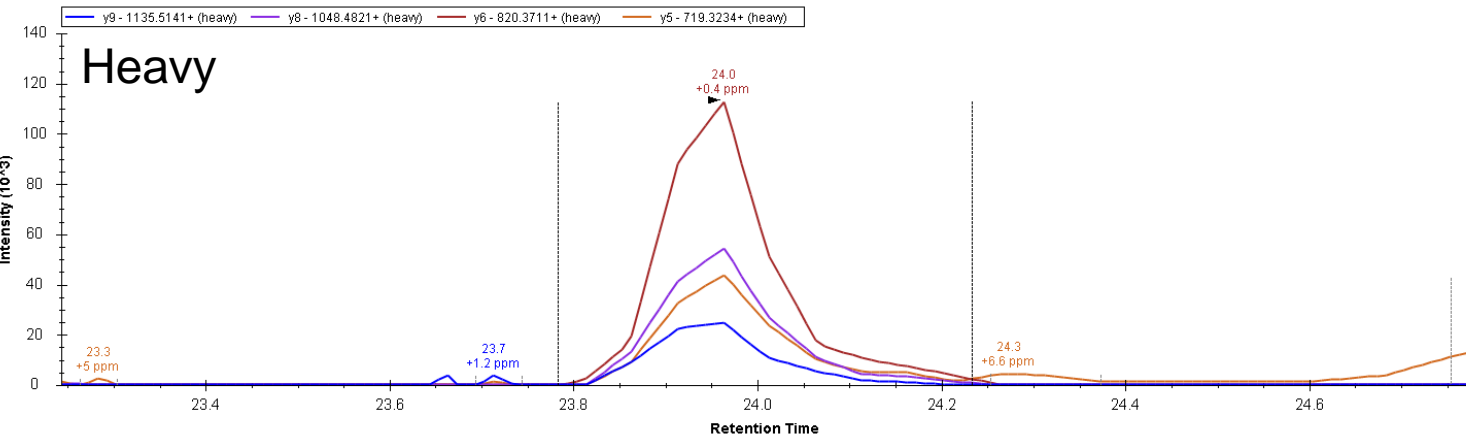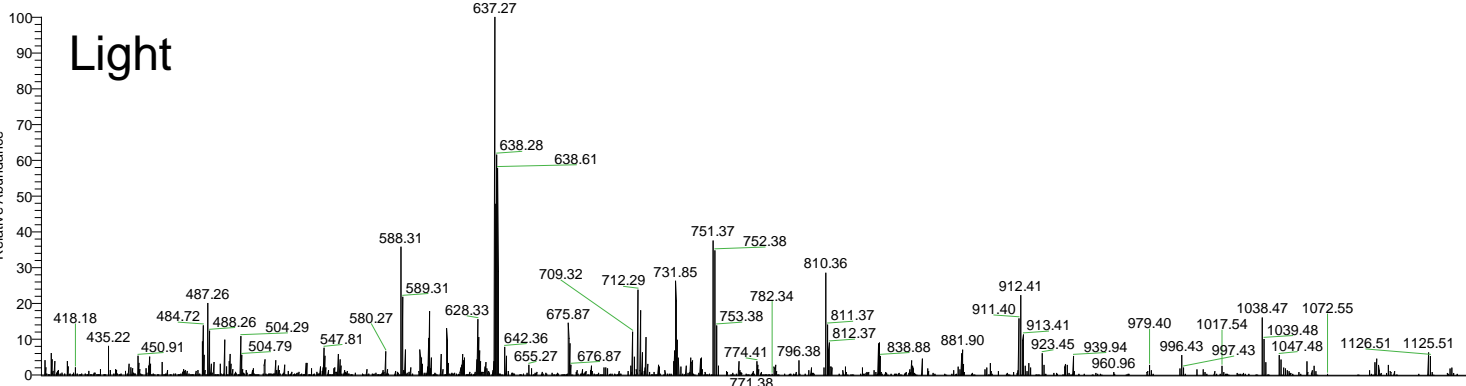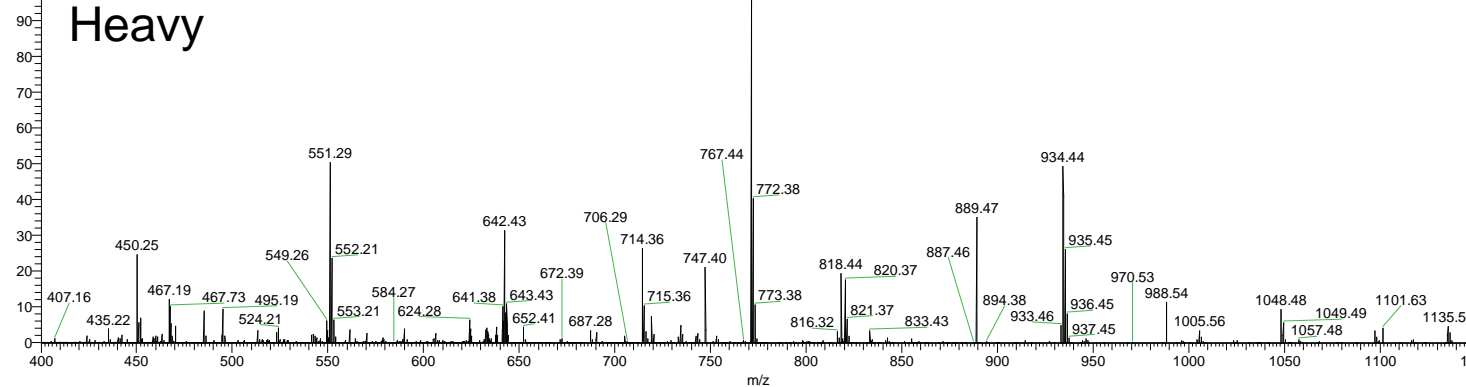

# T; CTSF\_266-278; SVGDLAPPEWDR

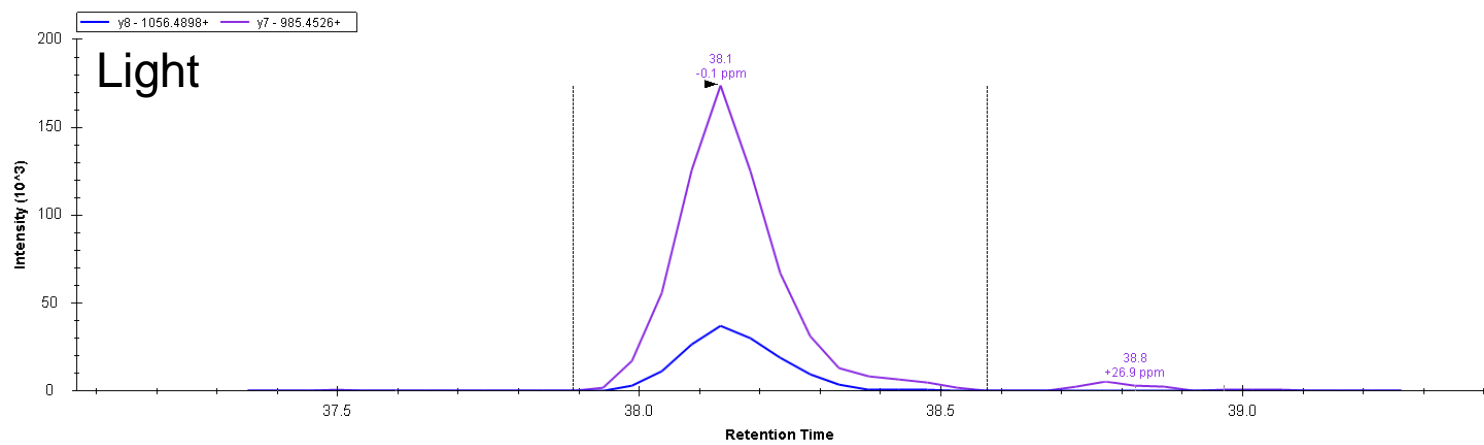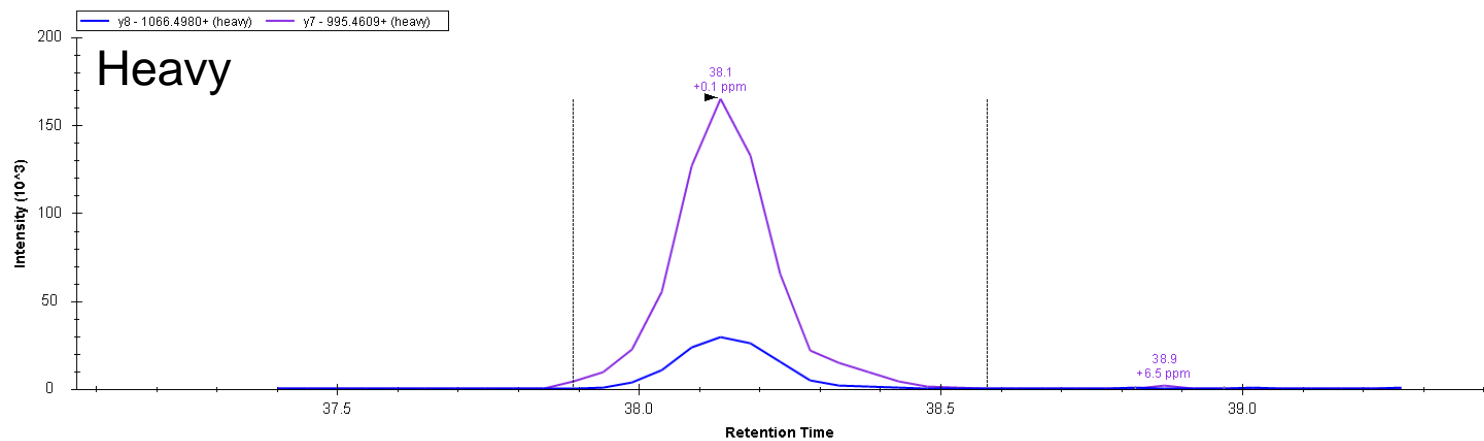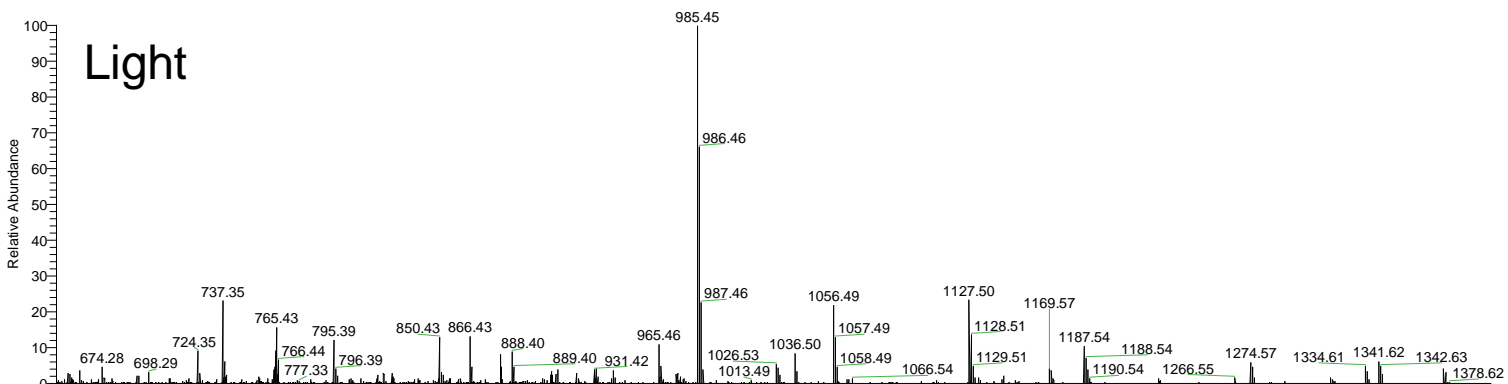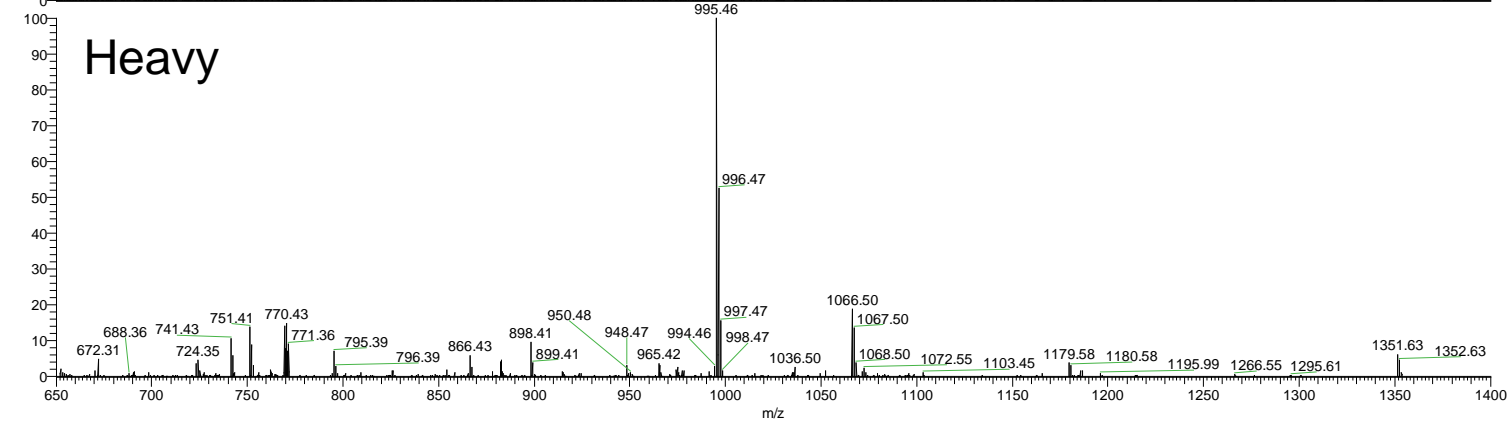

# U; CTSF\_442-450; SDVPFWAIK

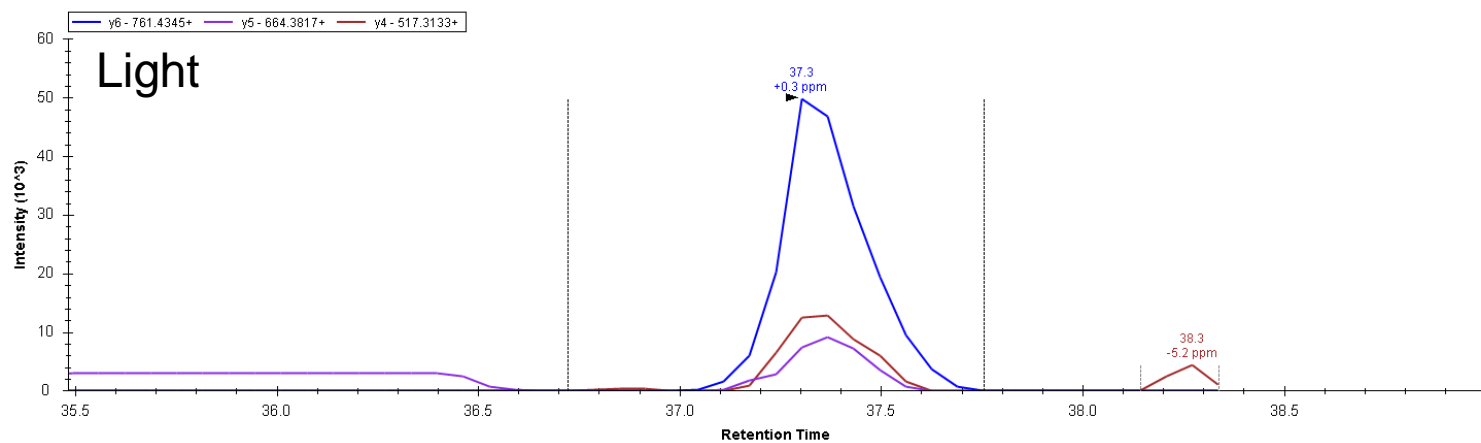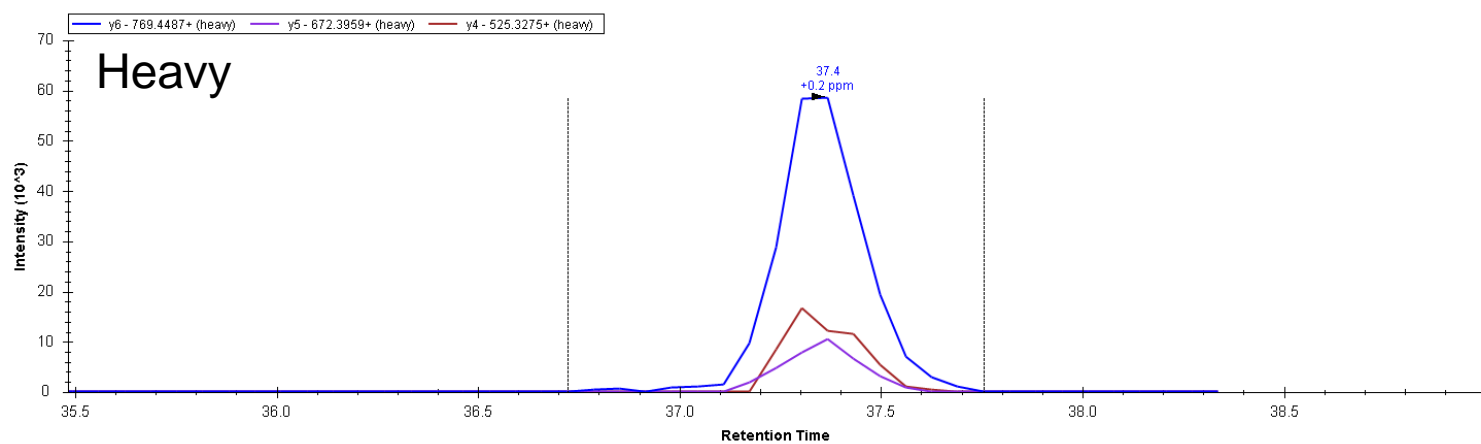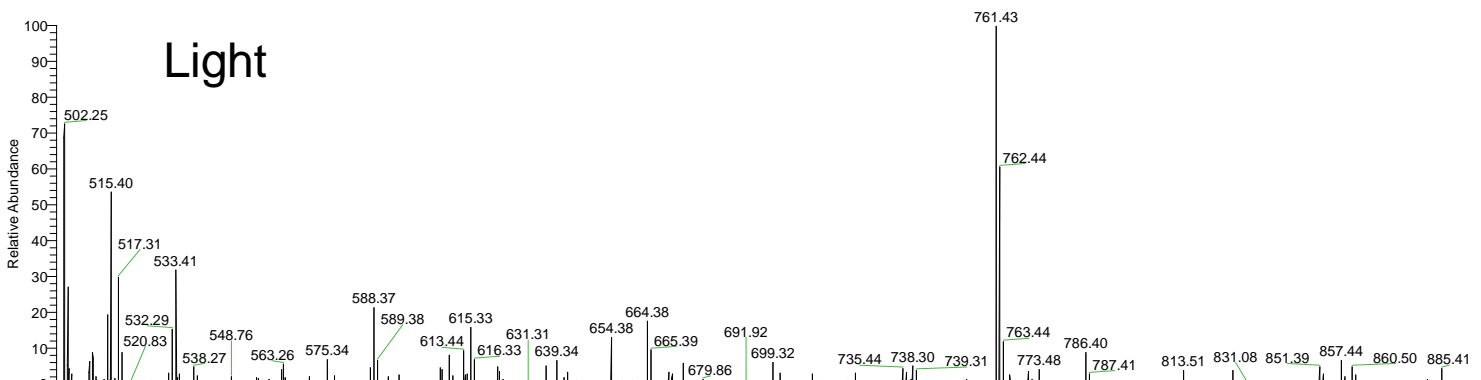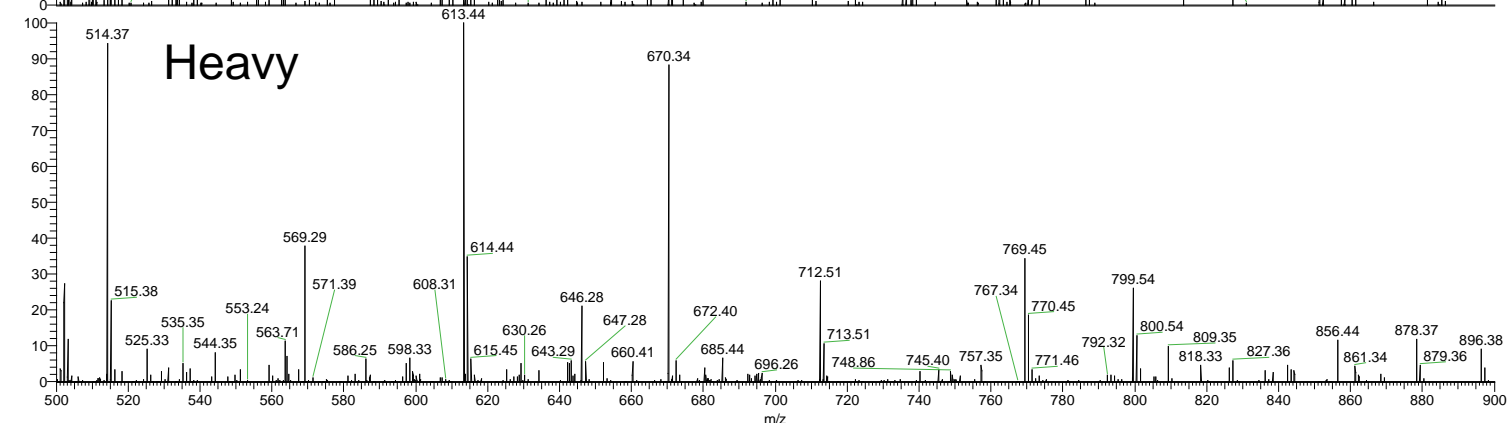

# V; CTSL\_105-116; VFQEPLFYEAR

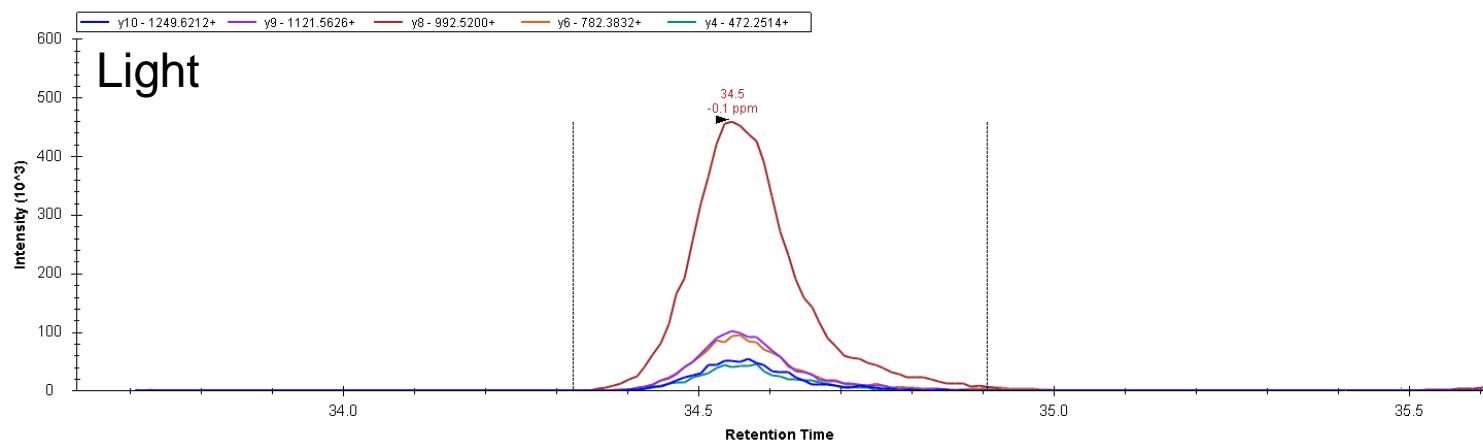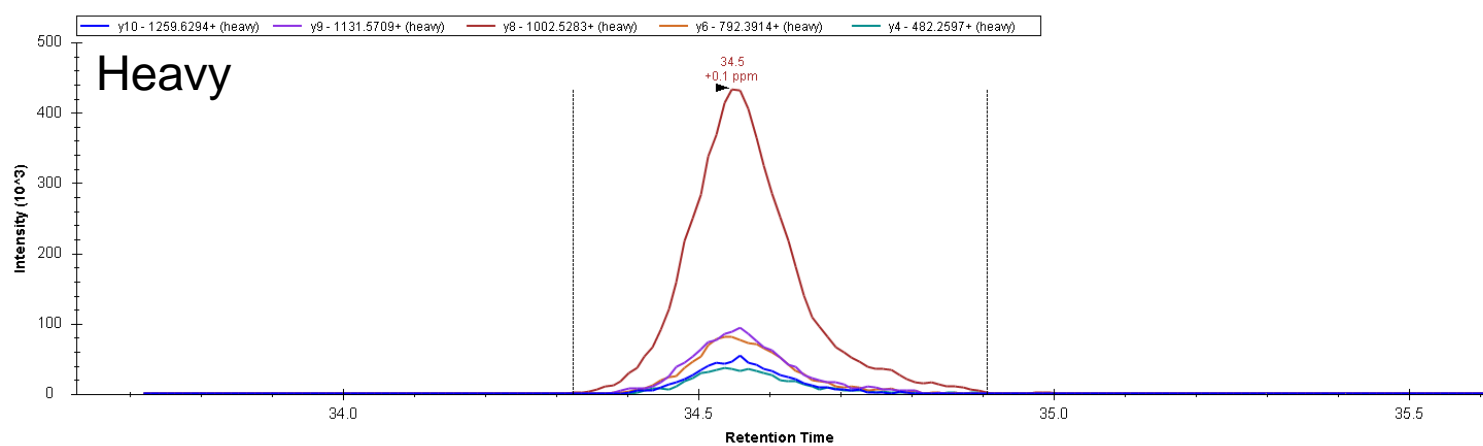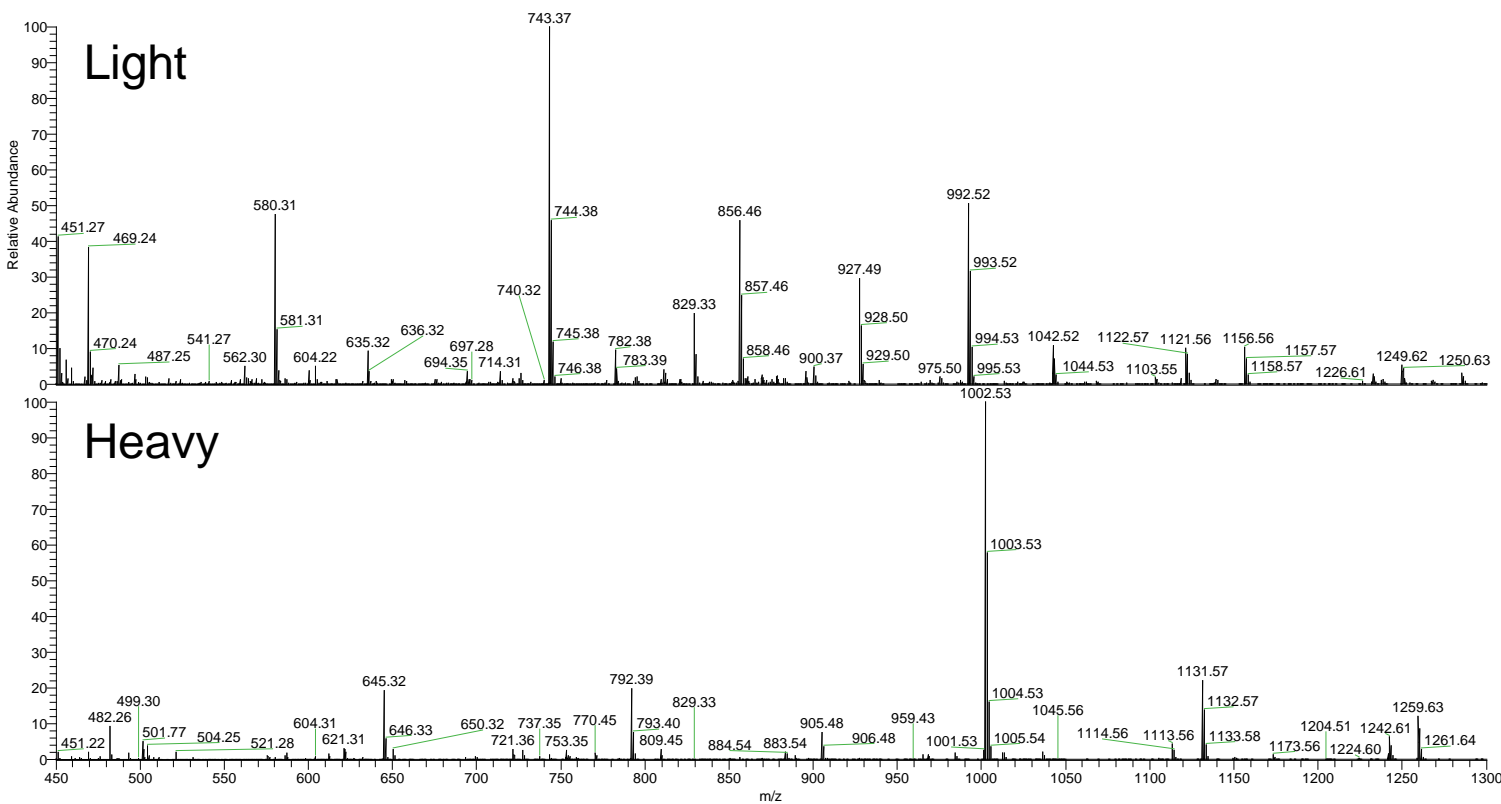



# W; CTSZ\_39-47; GDGLAPLGR

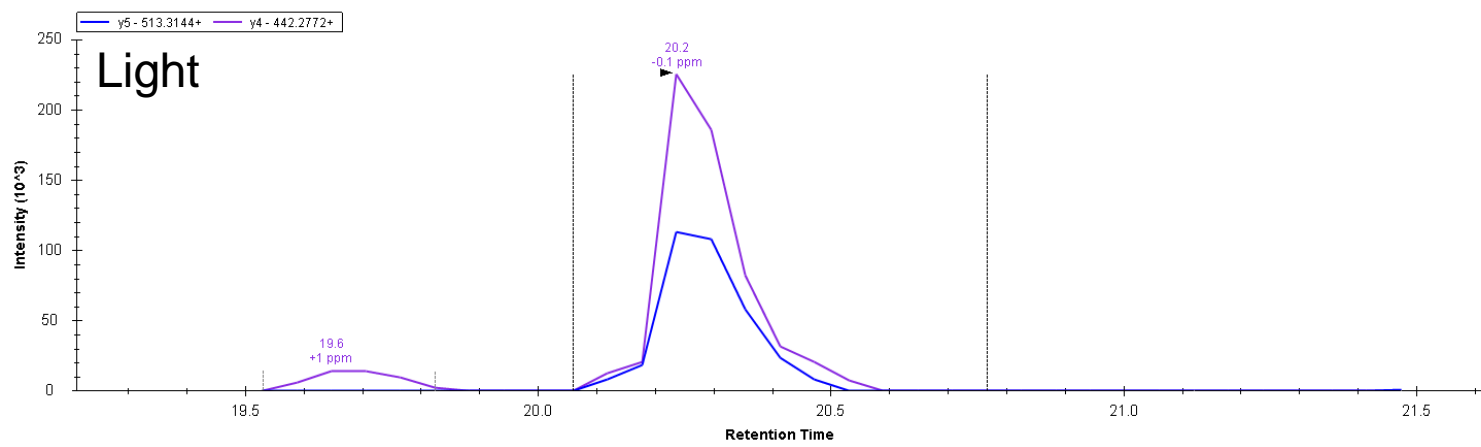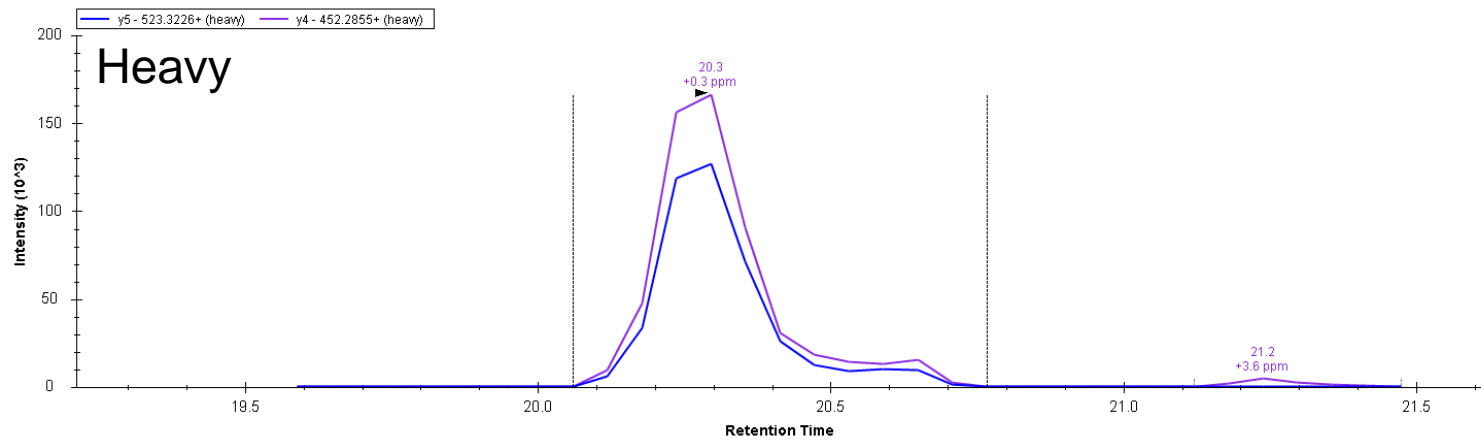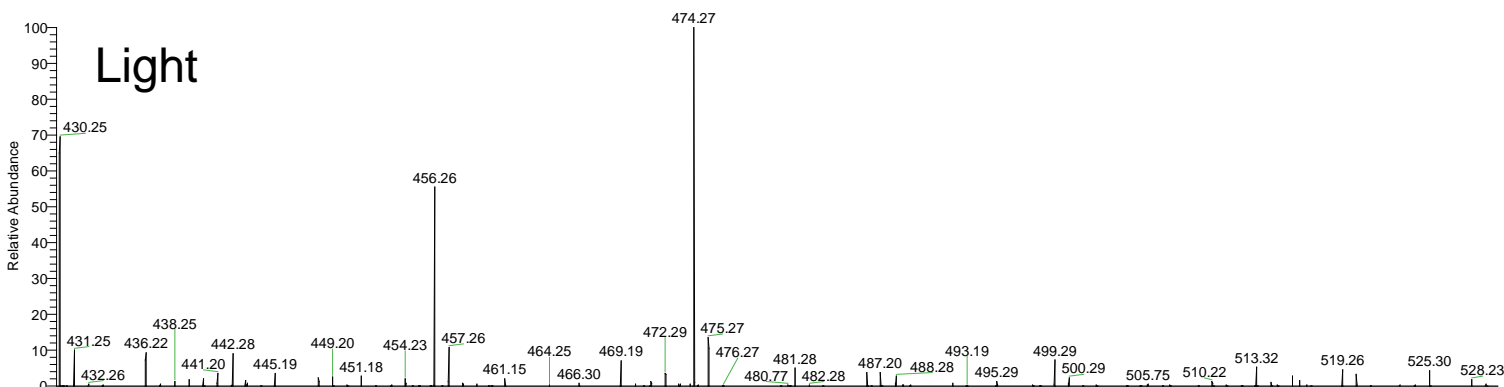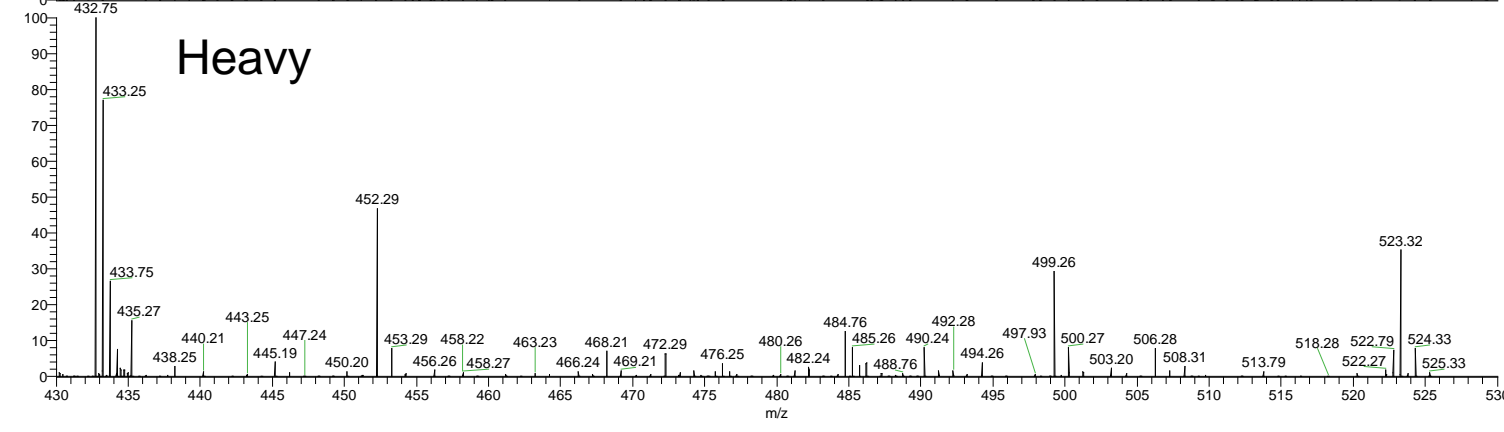

# X; CTSZ\_261-270; NSWGEPWGER

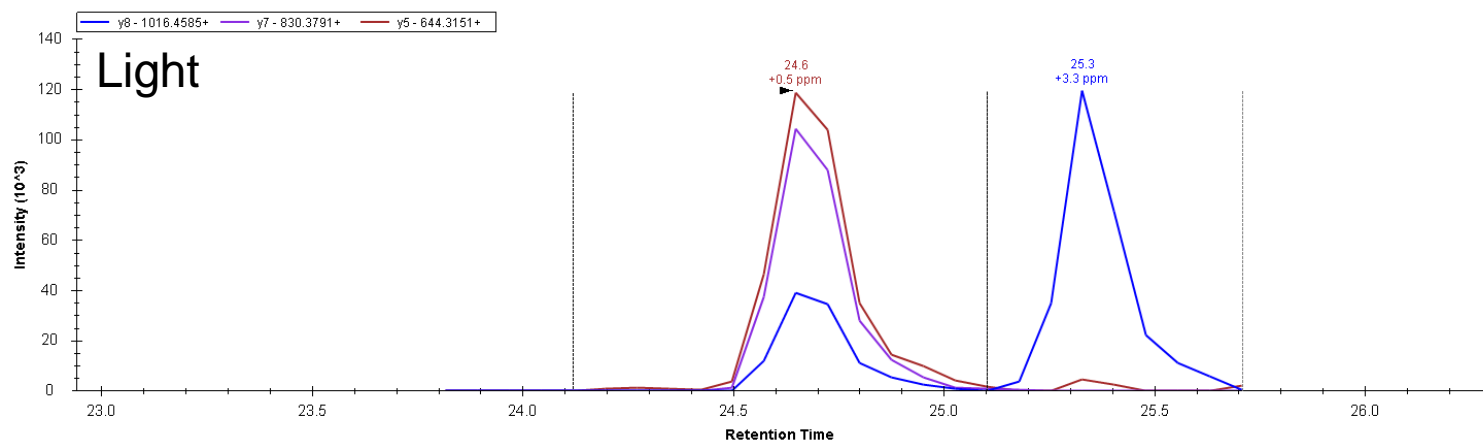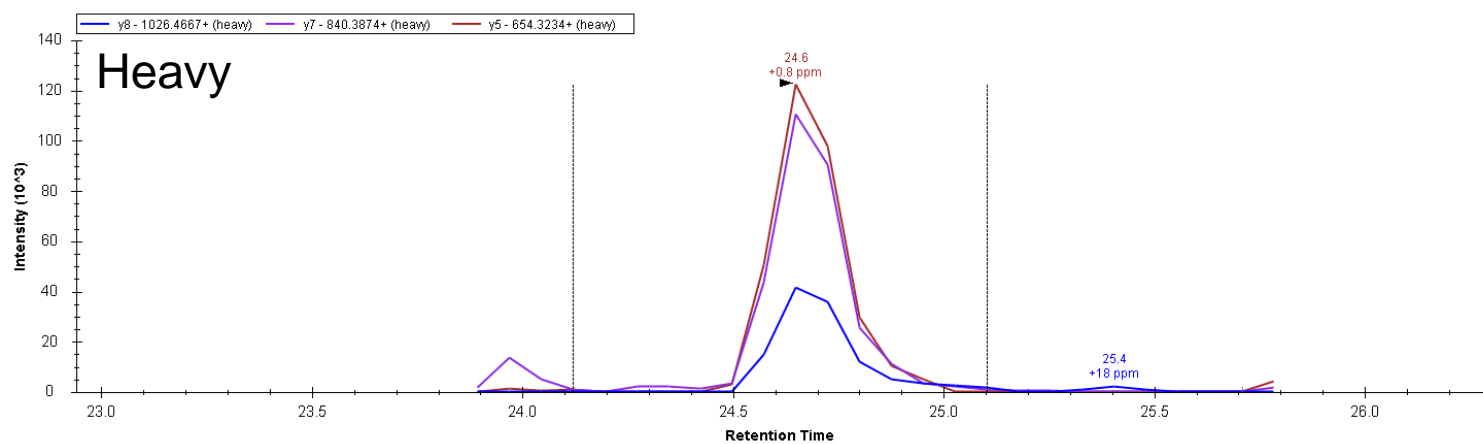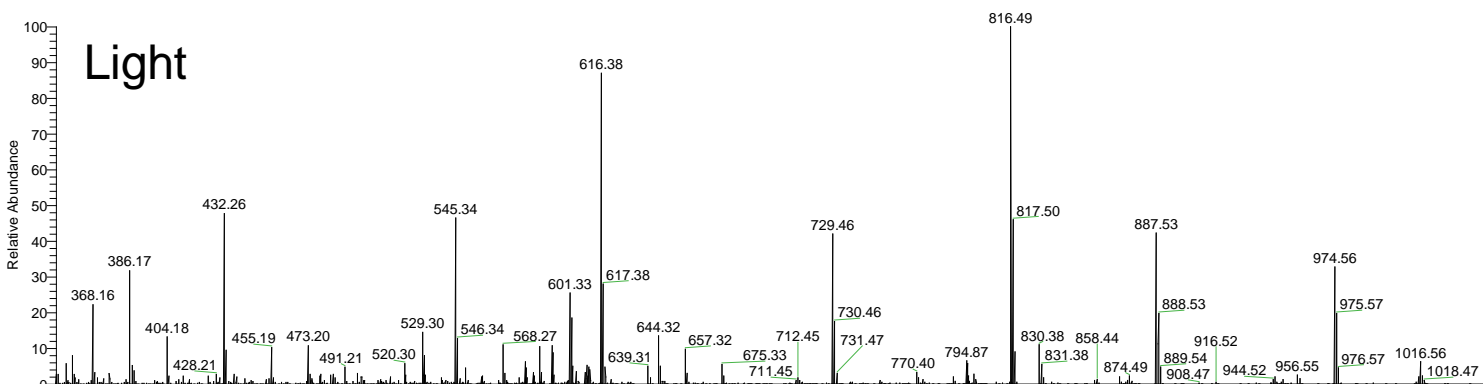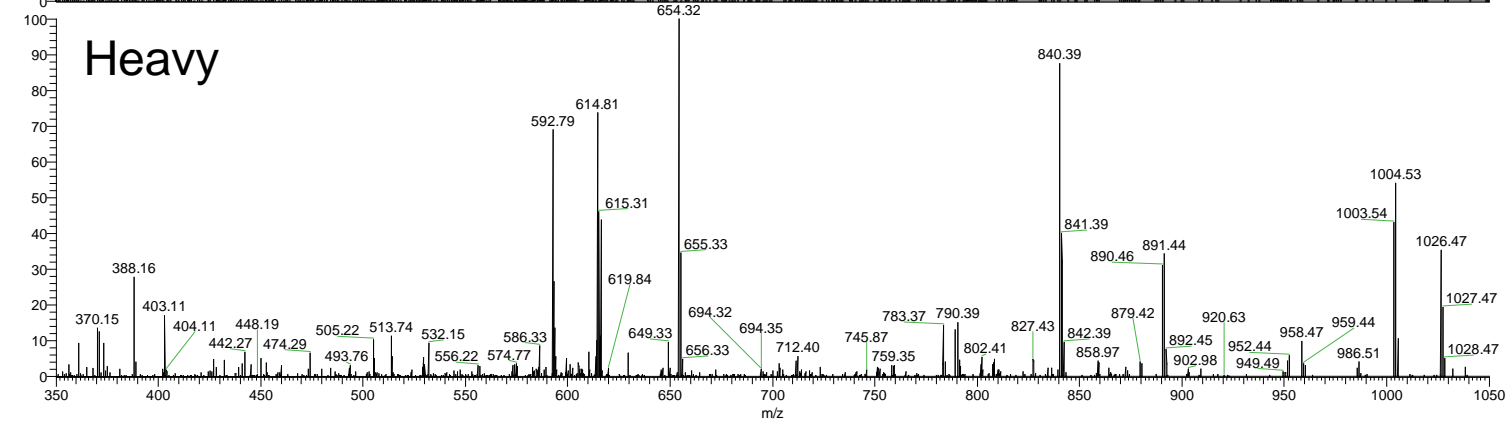

# Y; DPP7\_40-47, LDHFNFER

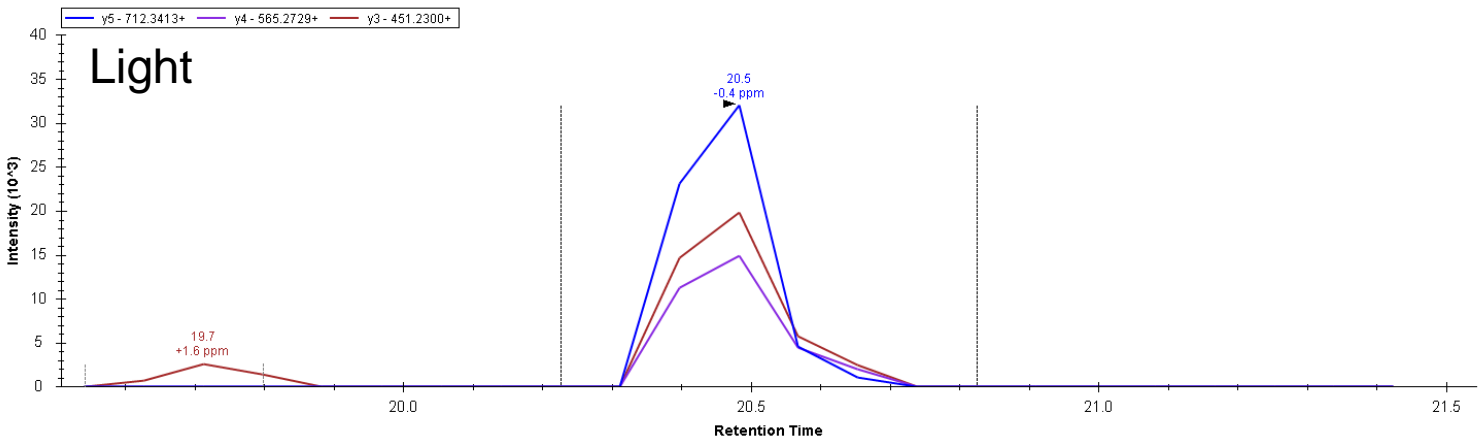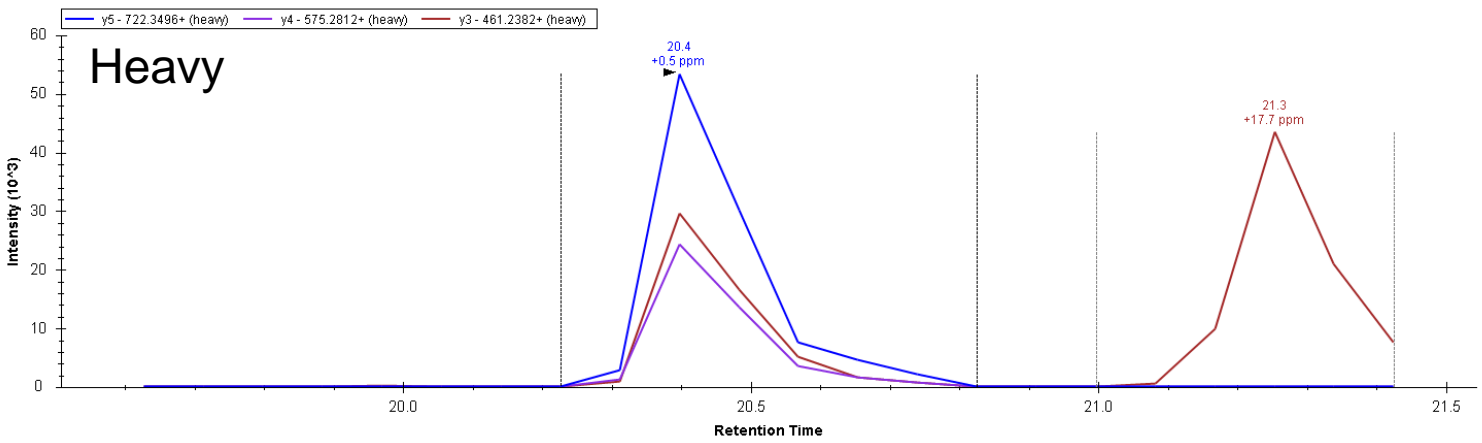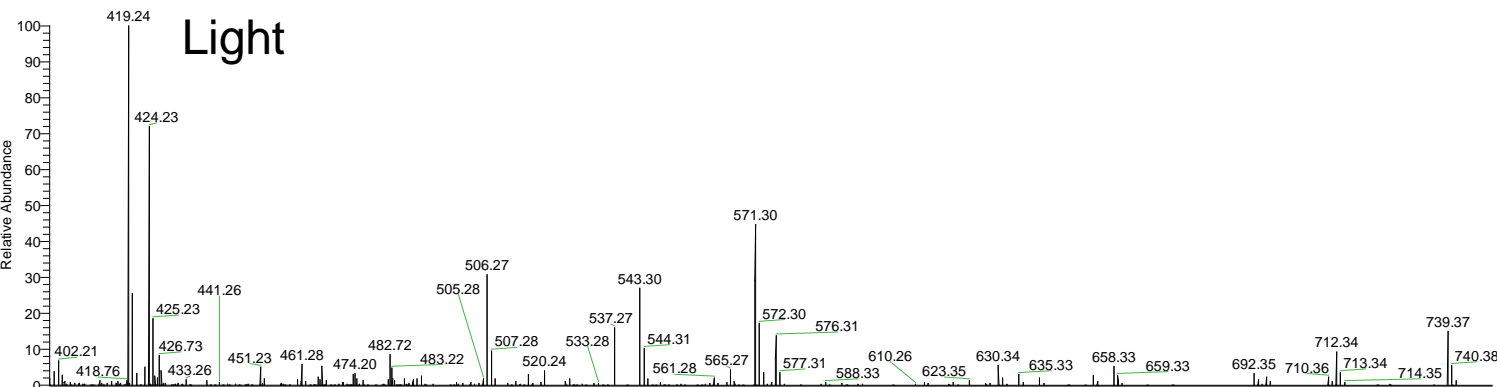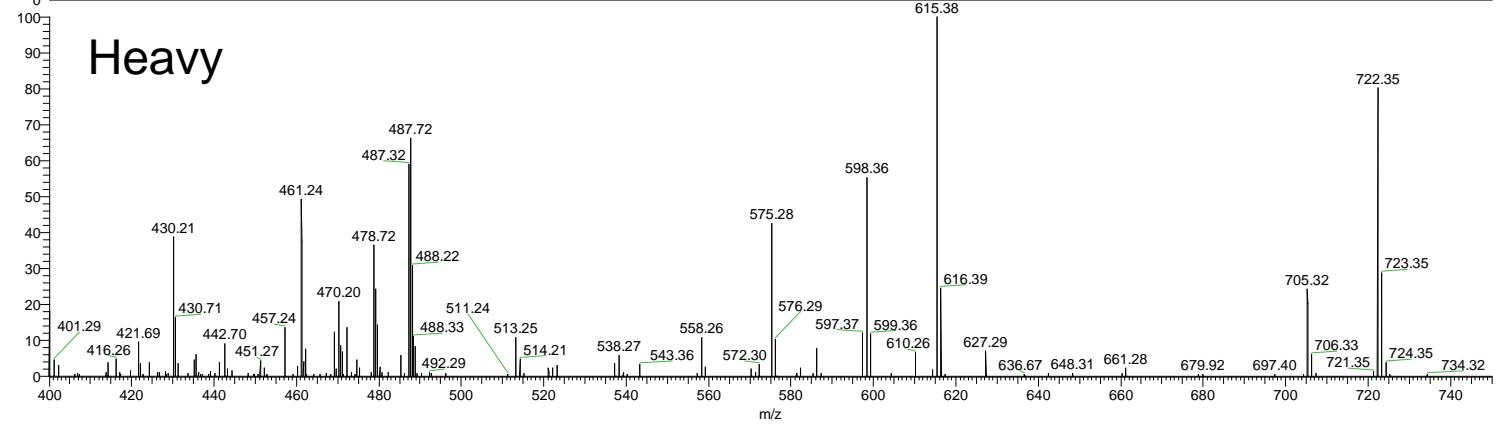

# Z; DPP7\_113-123; SLPFGAQSTQR

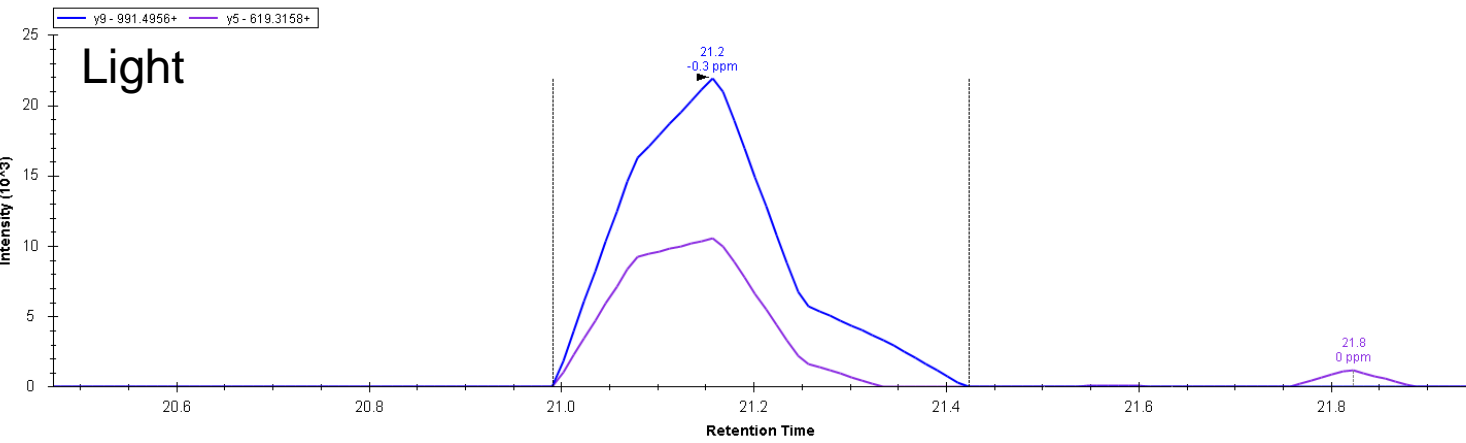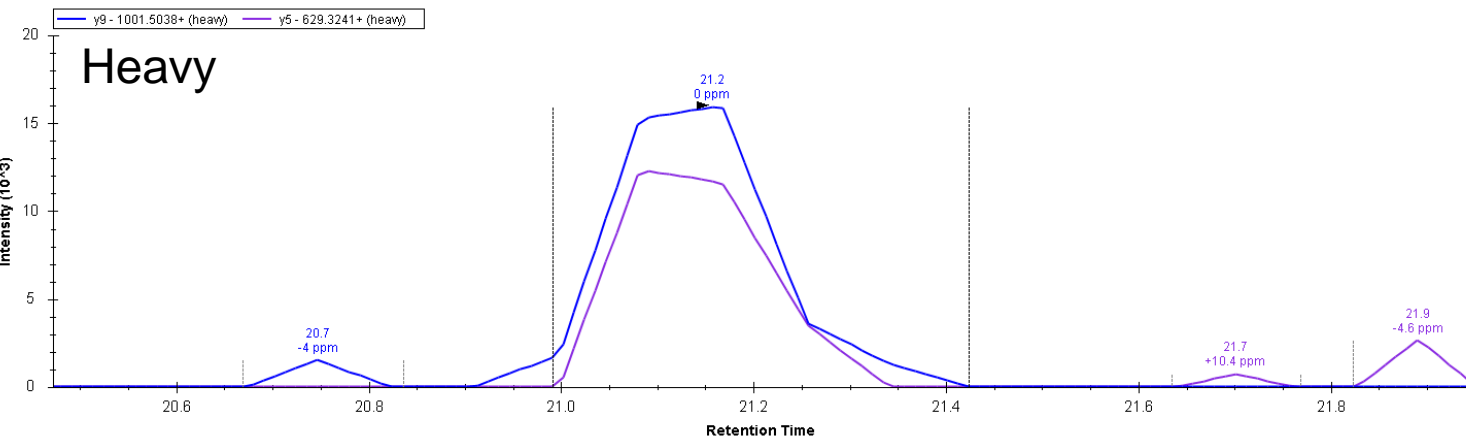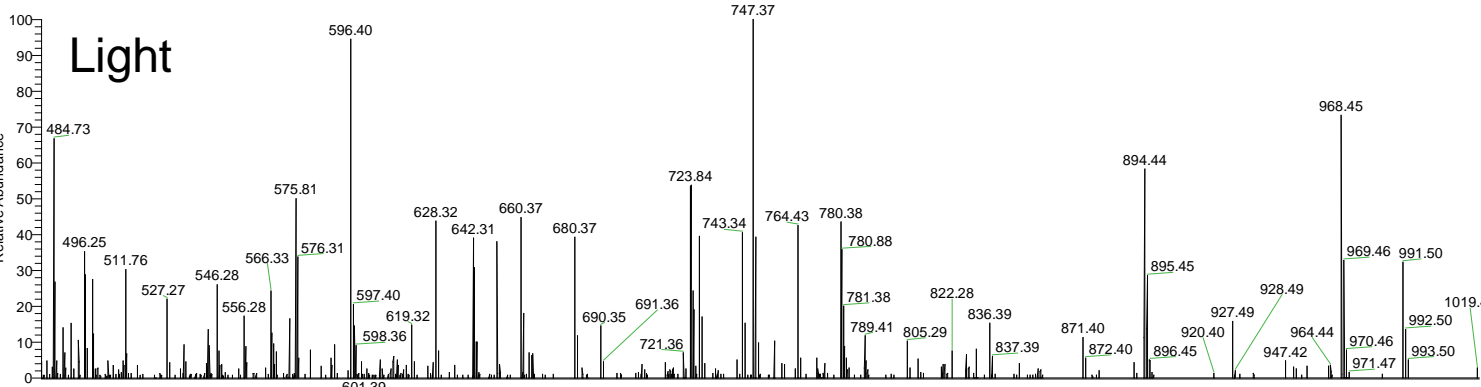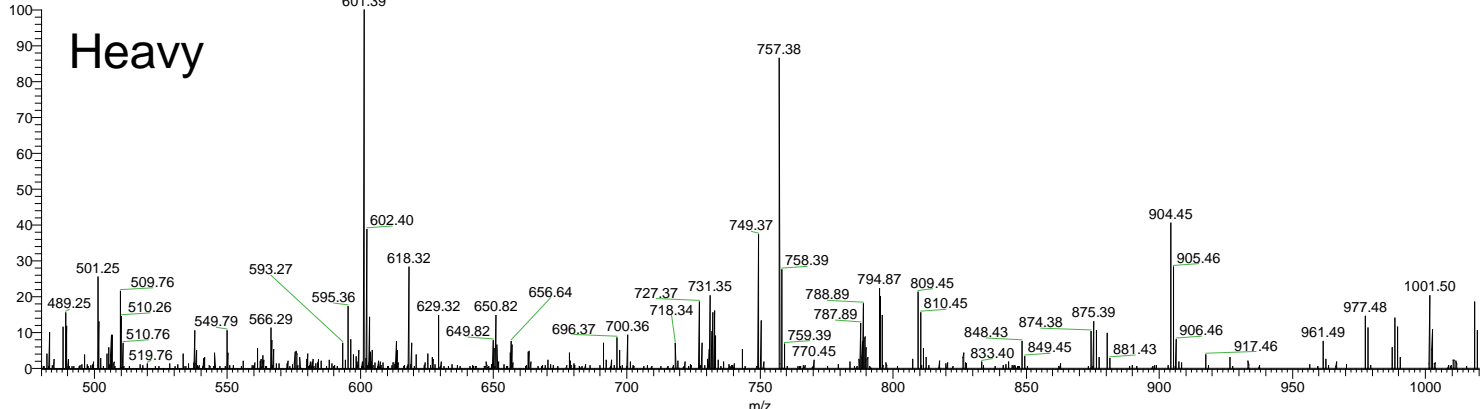

# Aa; DPP7\_449-462; ASHPEDPASVVEAR

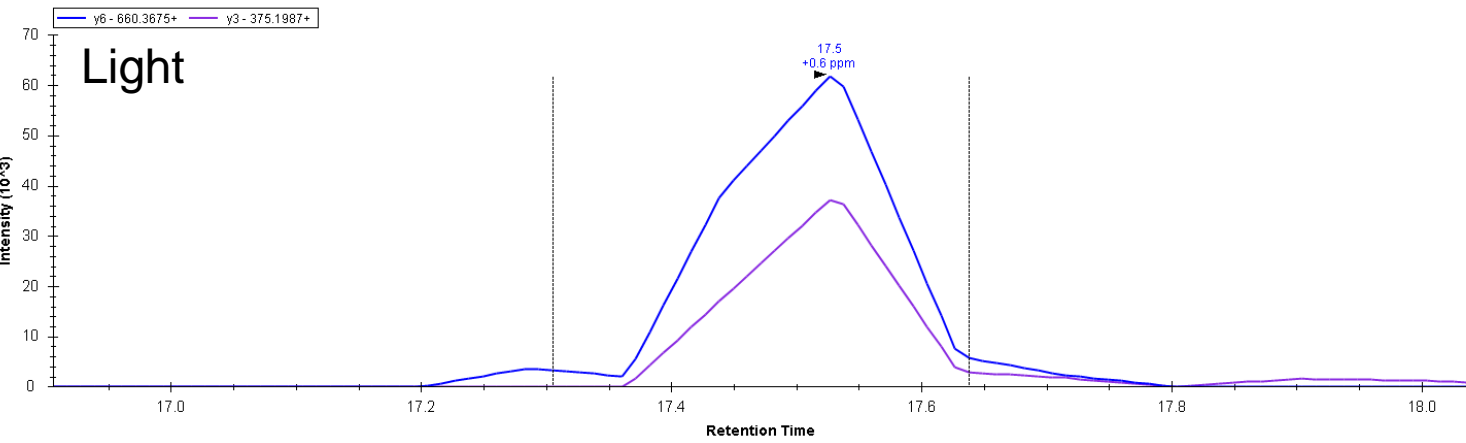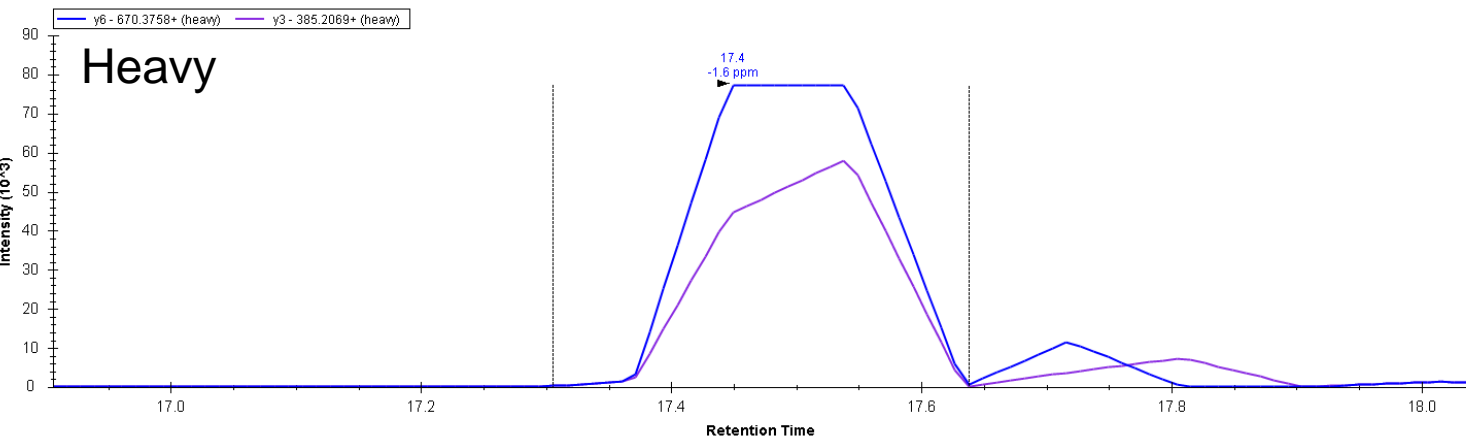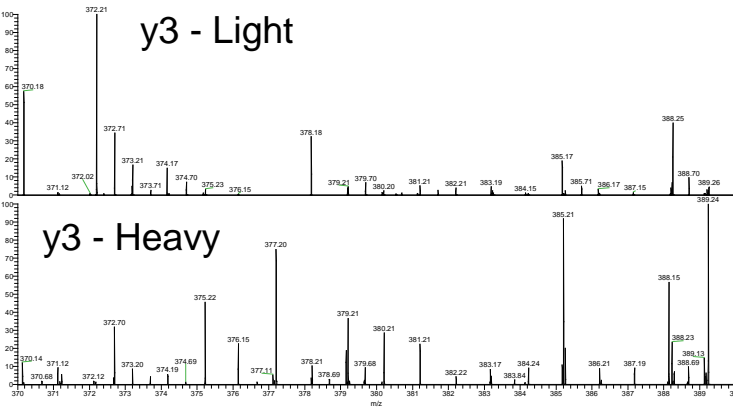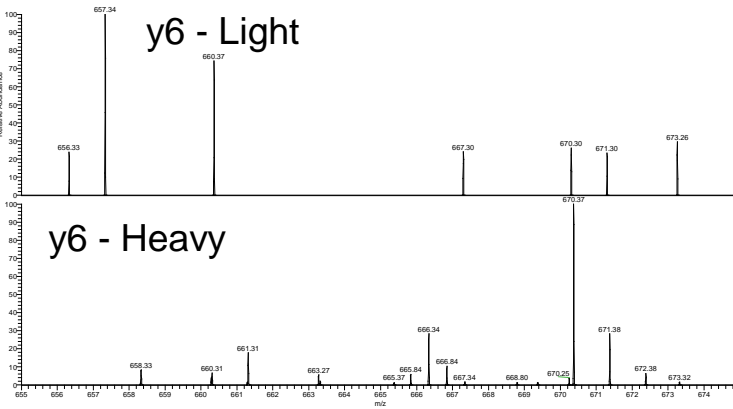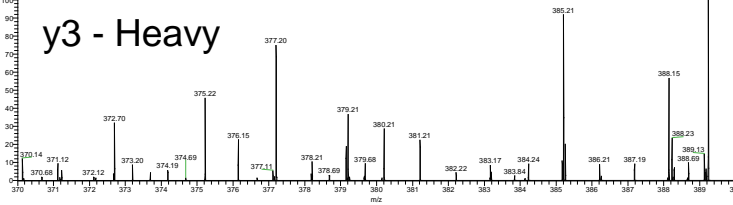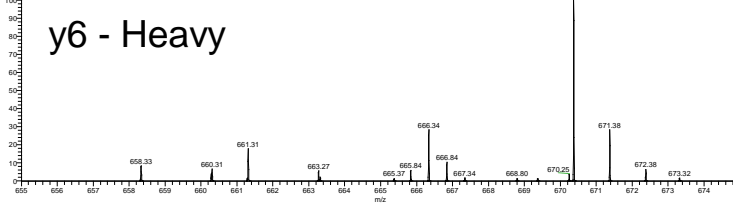

# Ab; GM2A\_89-96; EVAGLWIK

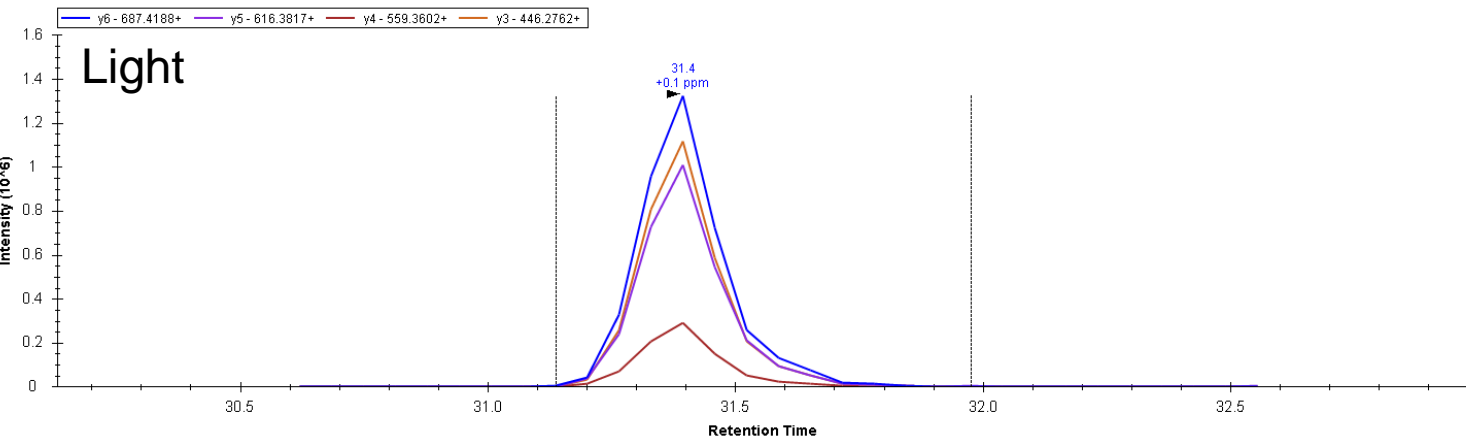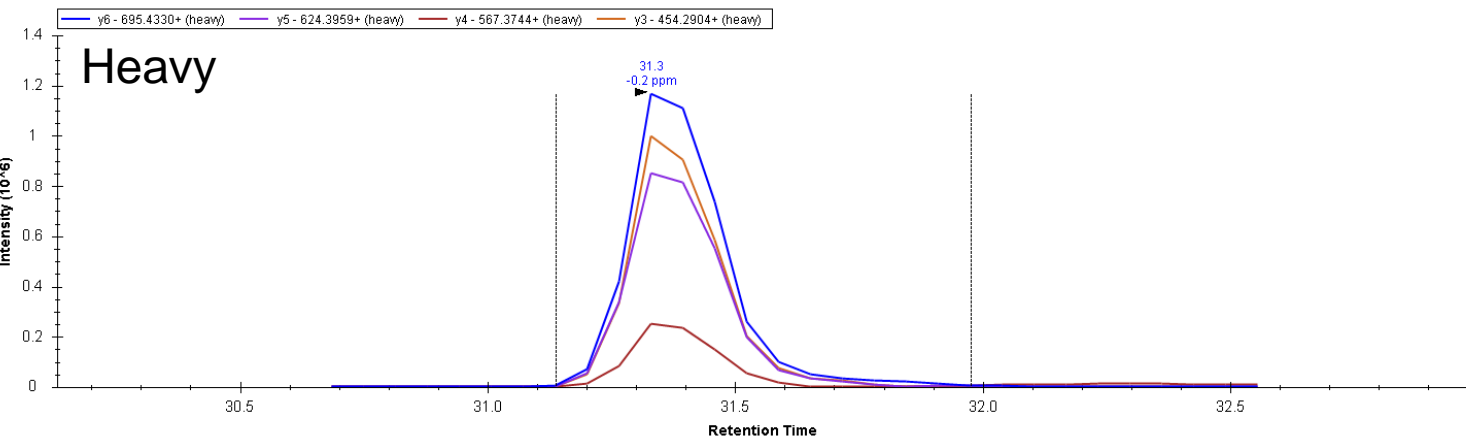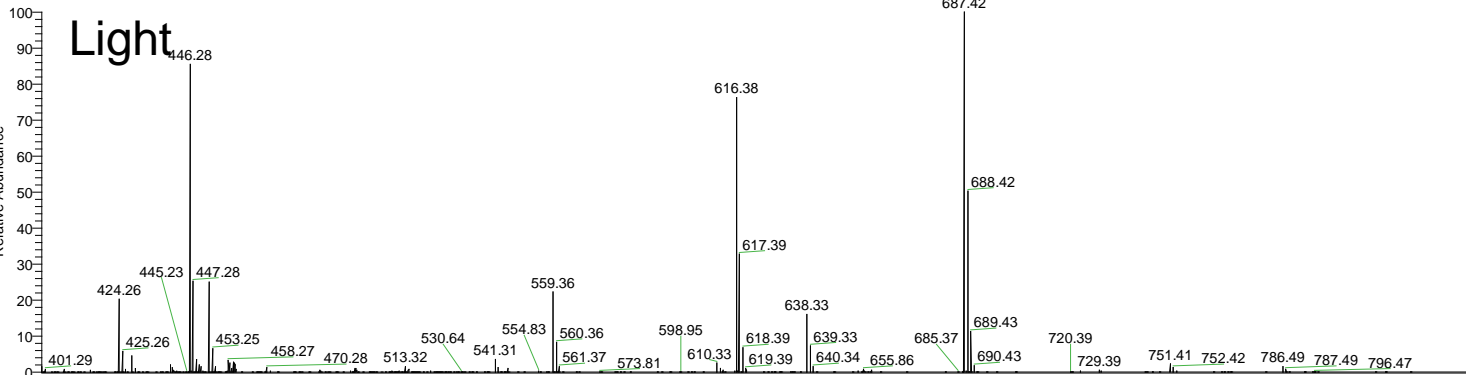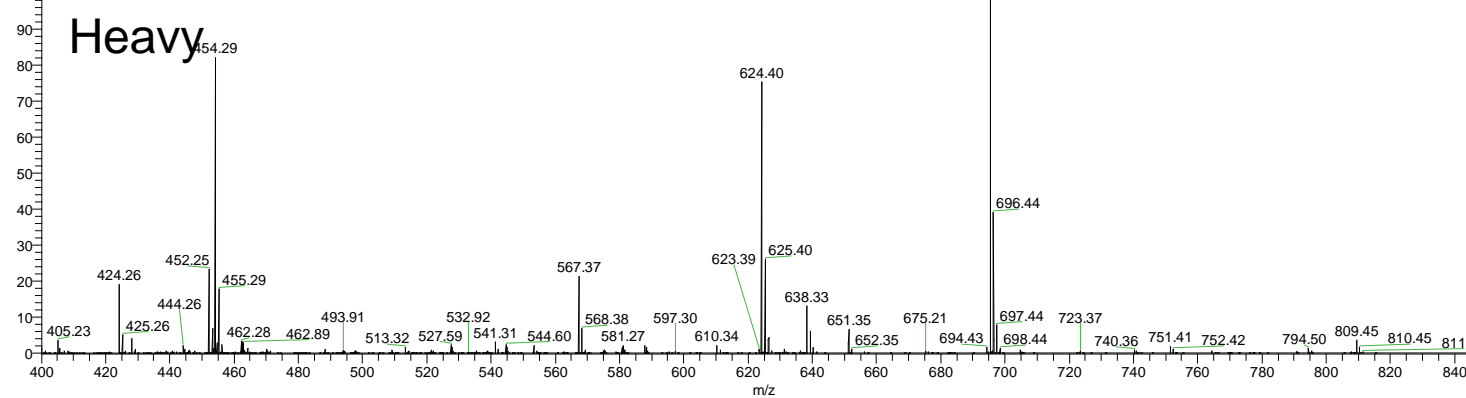

# Ac; GM2A\_170-179; IESVLSSSGK

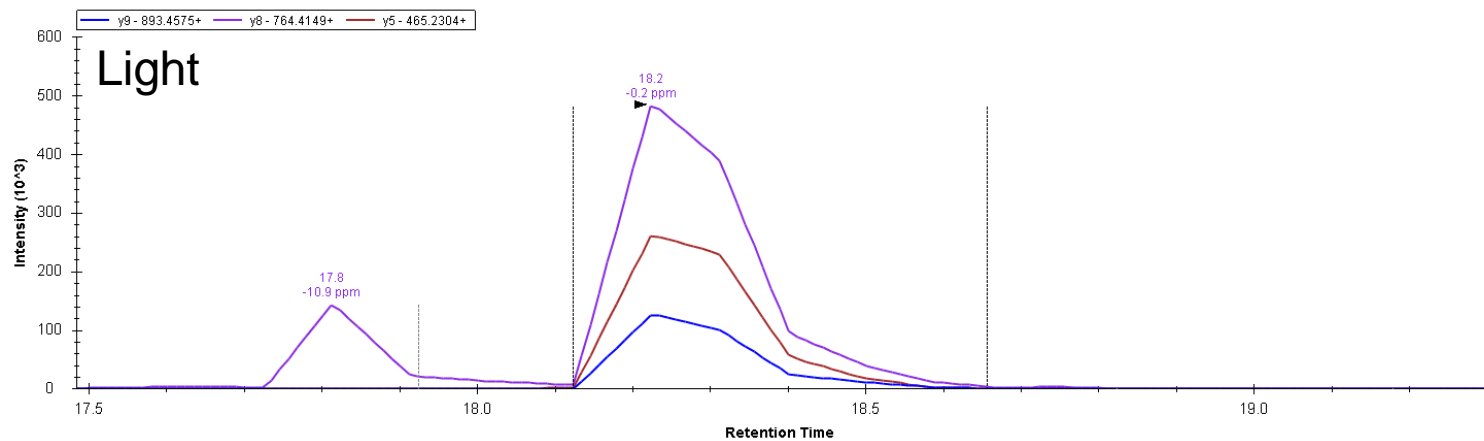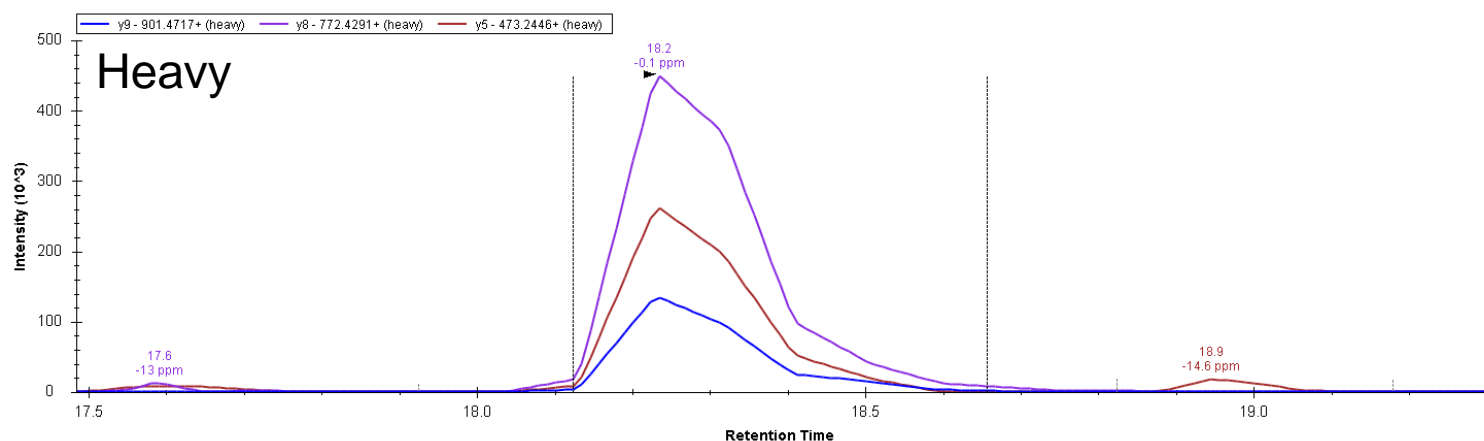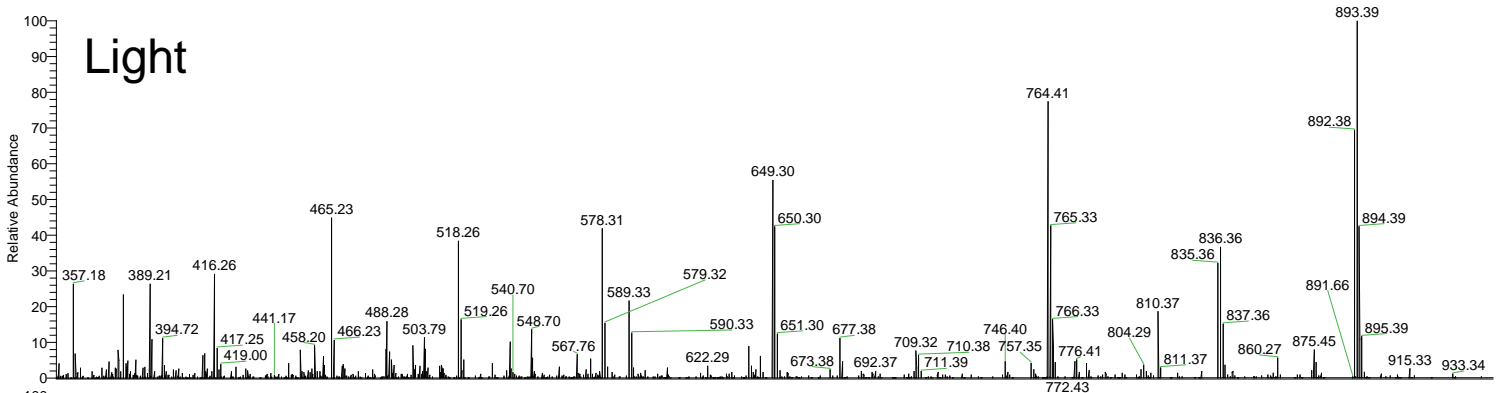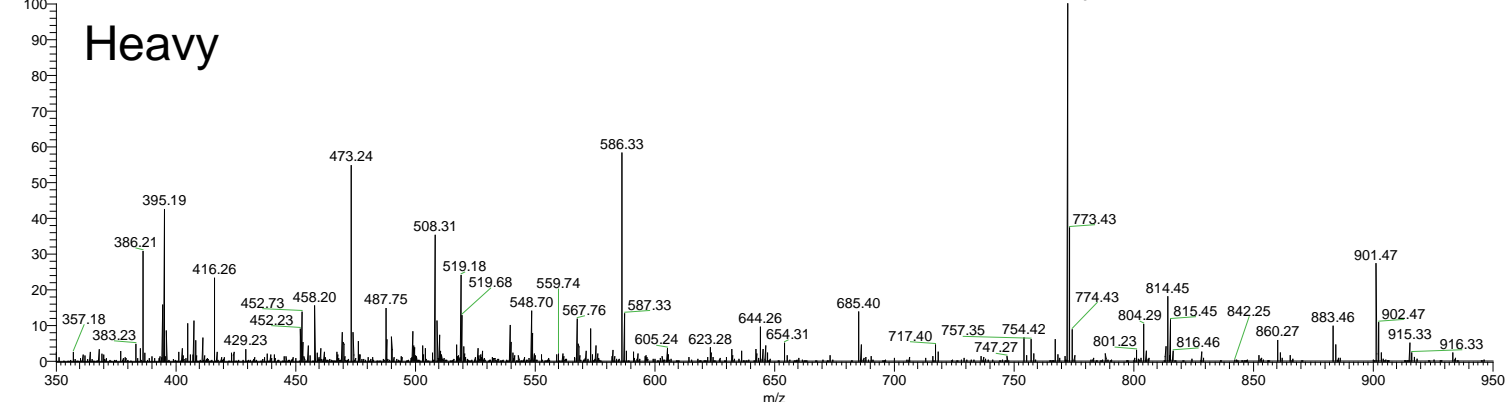

# Ad; HEXB\_285-300; VLPEFDTPGHTLSWGK

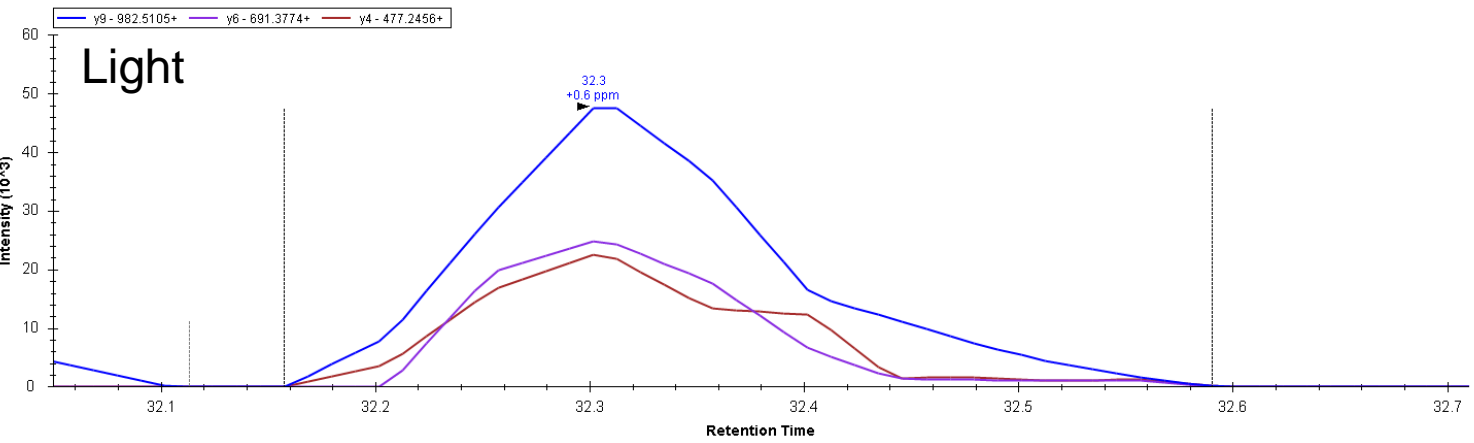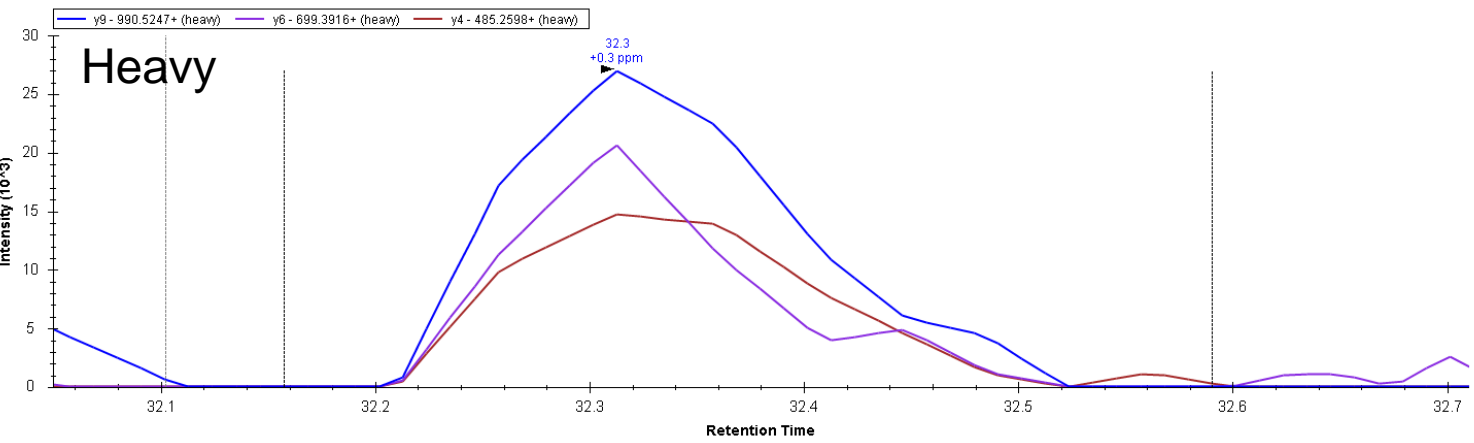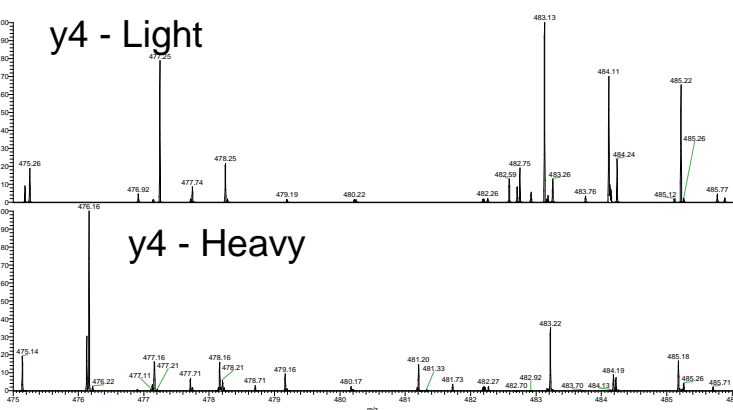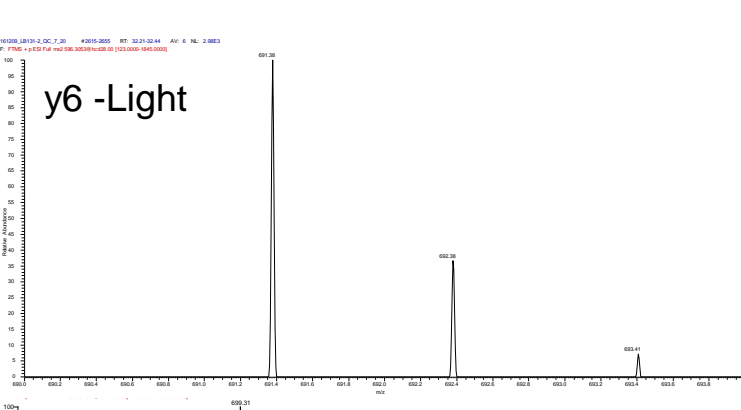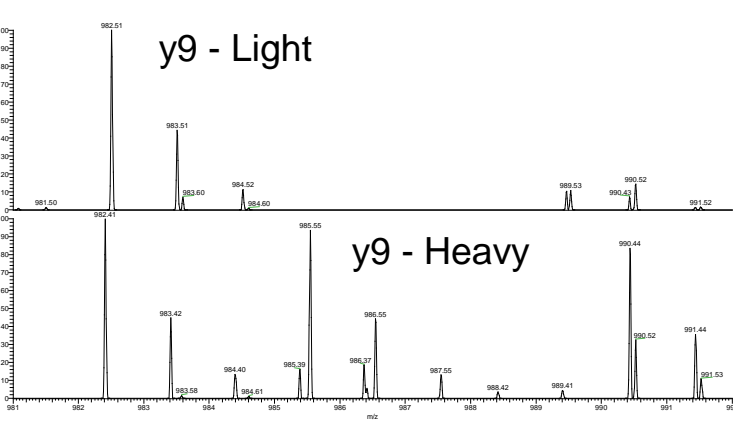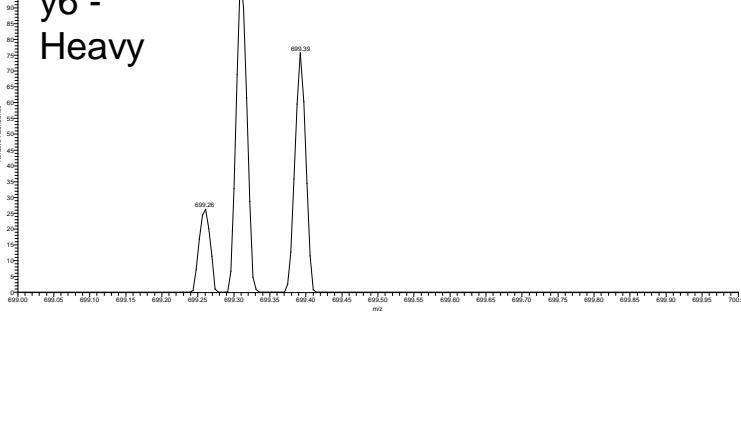



# Ae; HEXB\_391-400; VLDIIATINK

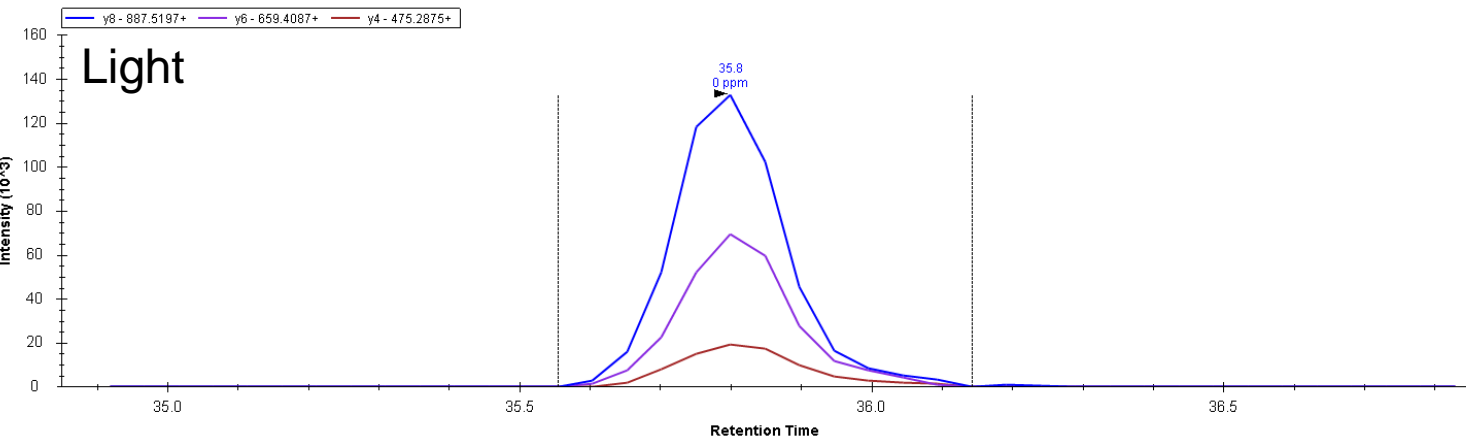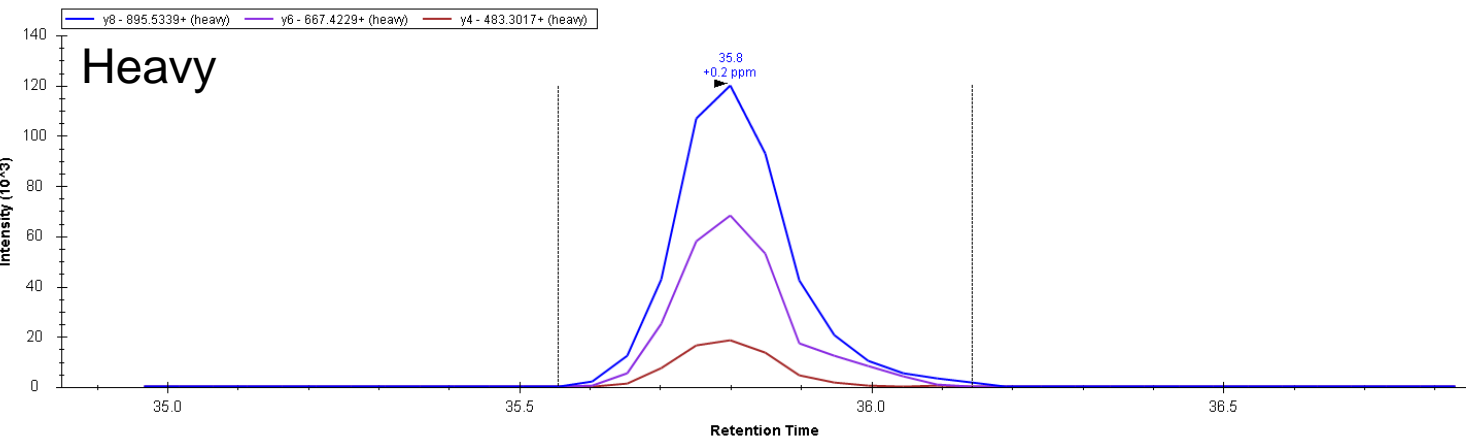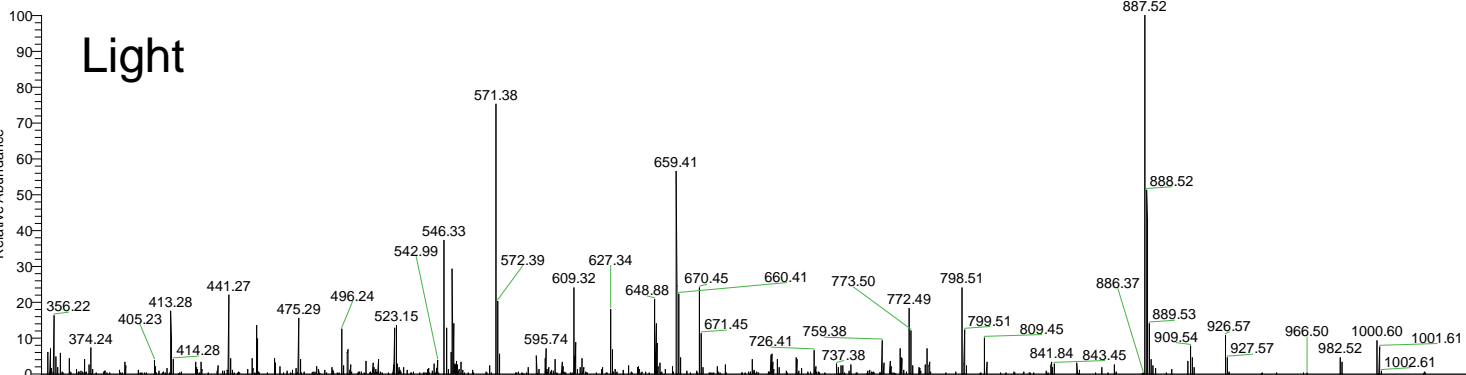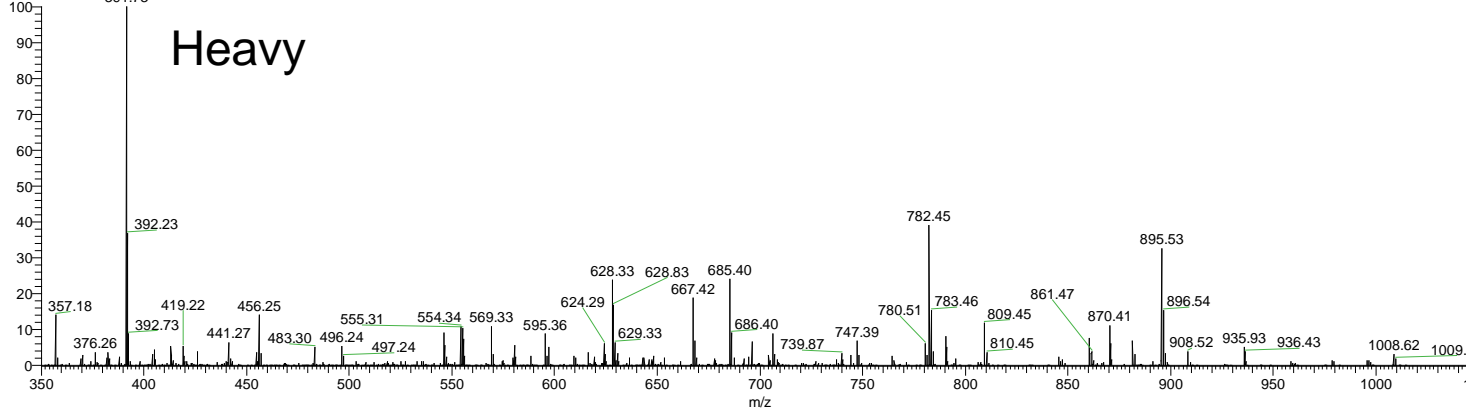

# Af; LAMP1\_138-146; TVESITDIR

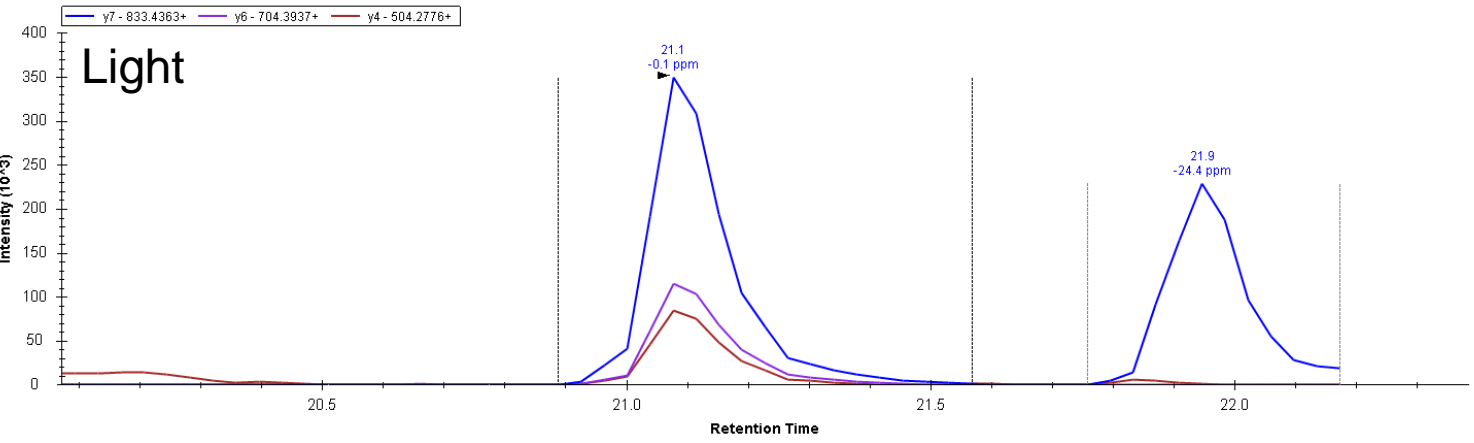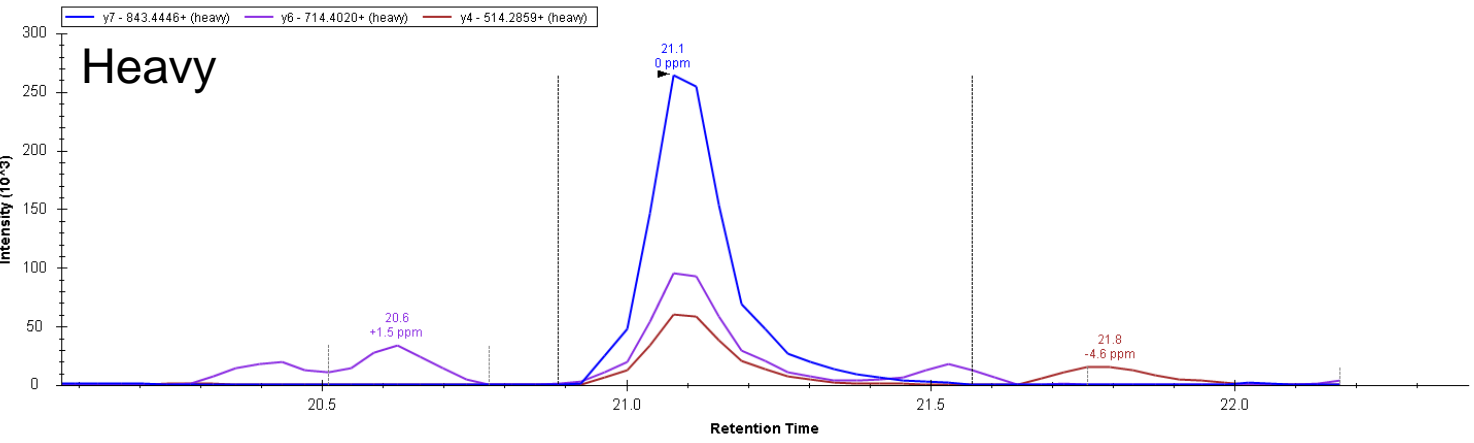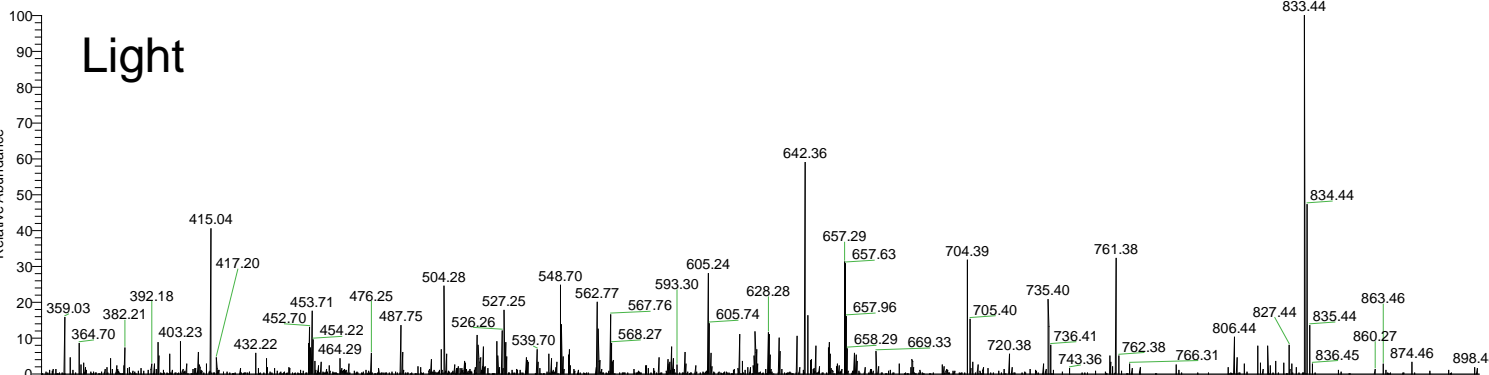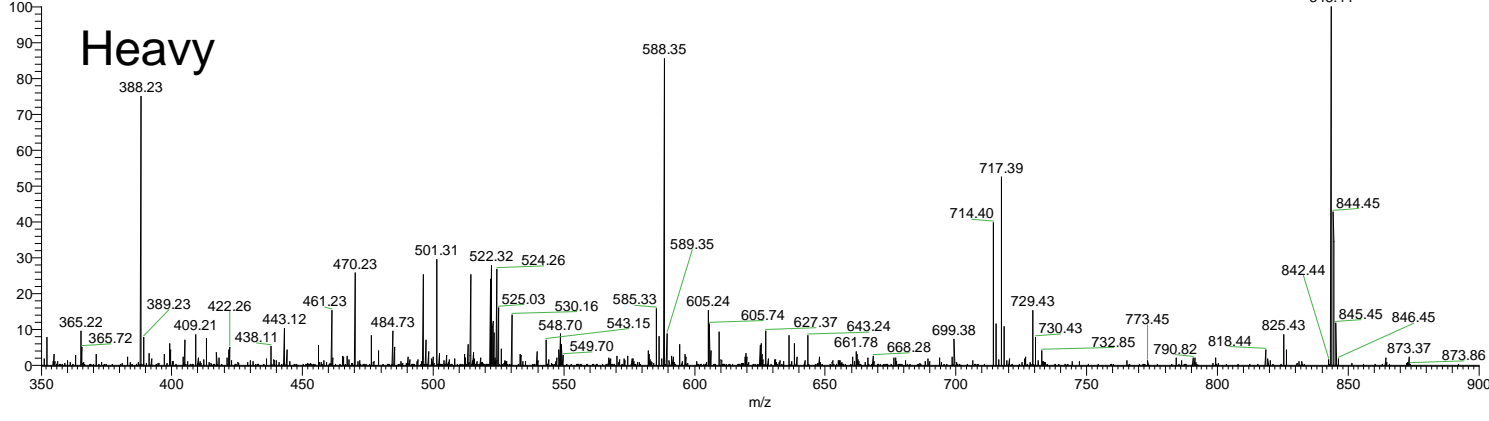

# Ag; LAMP1\_327-337; ALQATVGN SYK

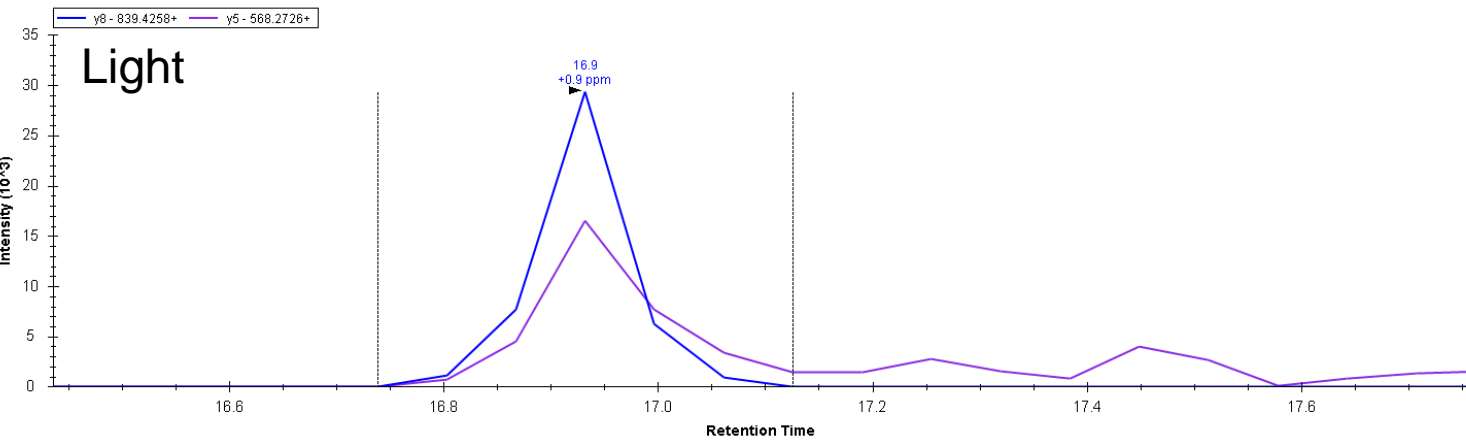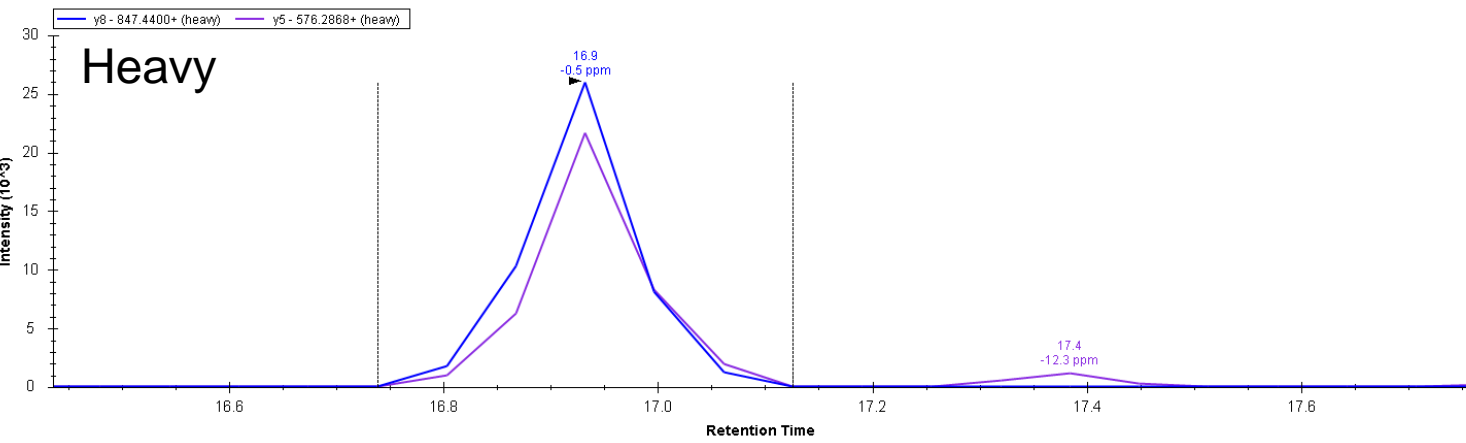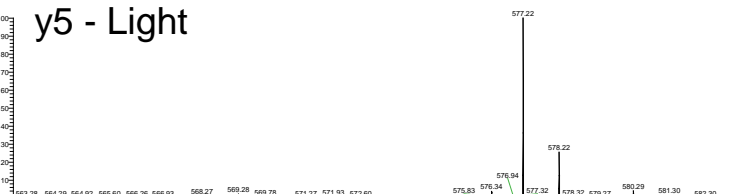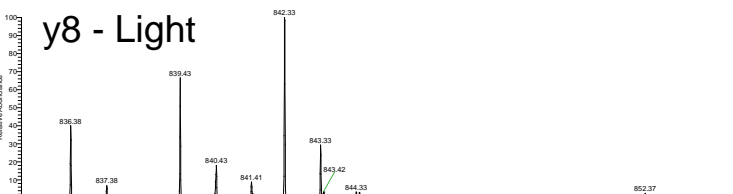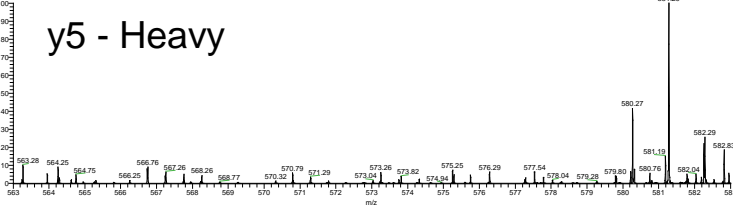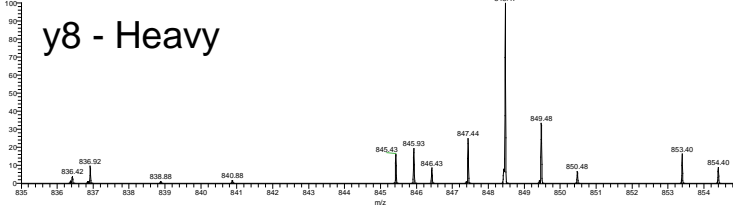

# Ah; LAMP1\_357-363; VVVQAFK

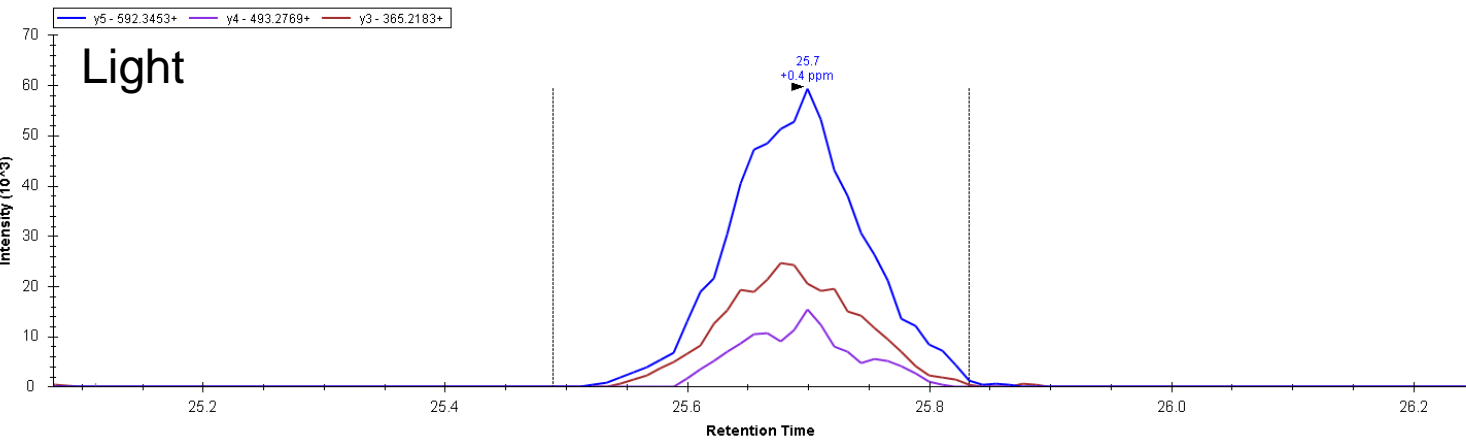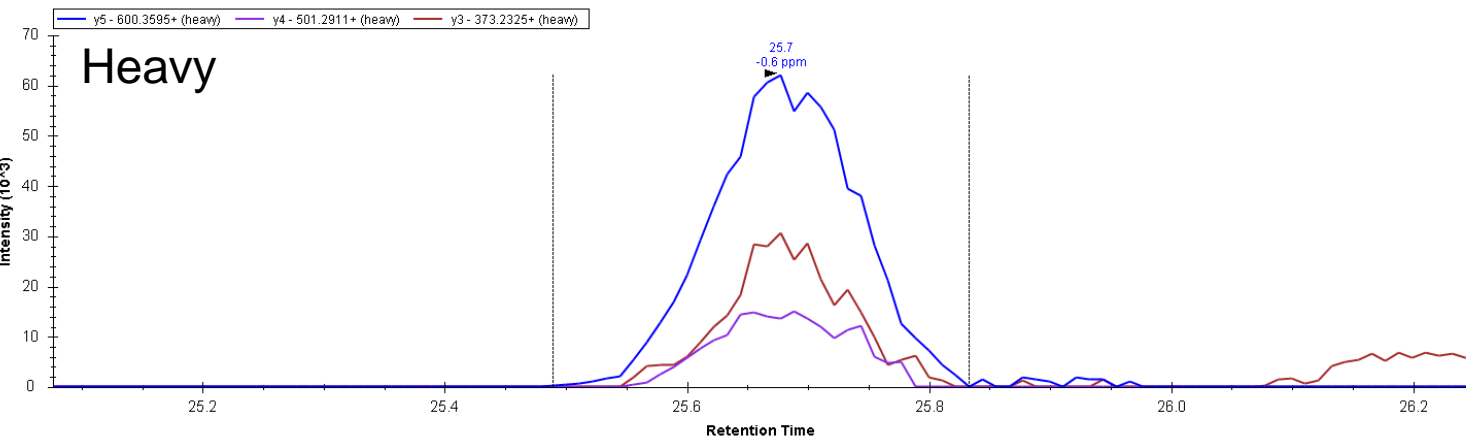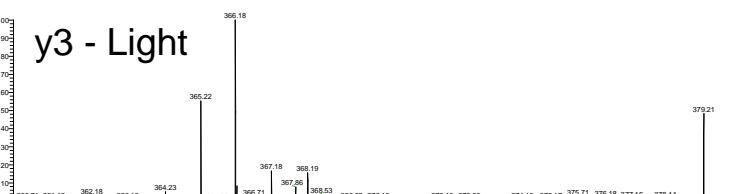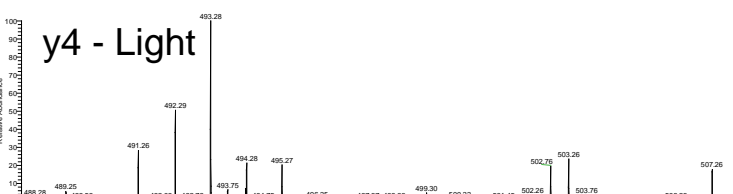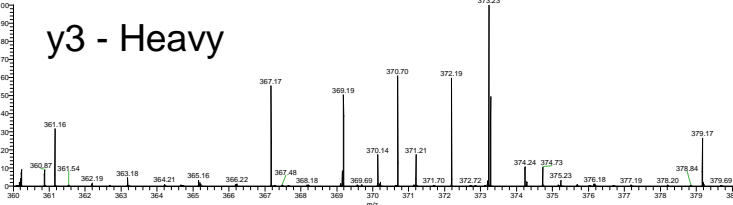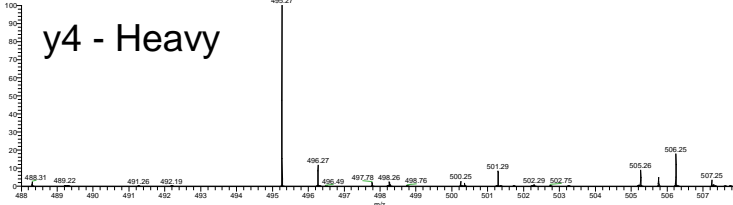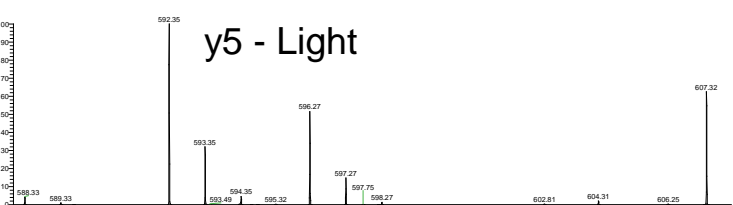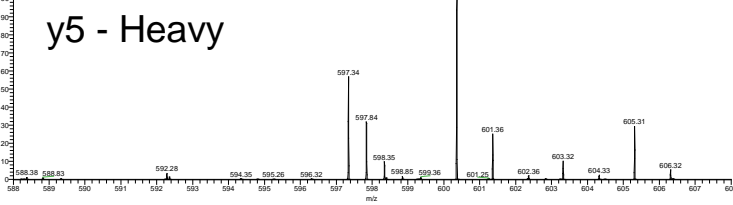

# Ai; LAMP2\_133-144; GILTVDELLAIR

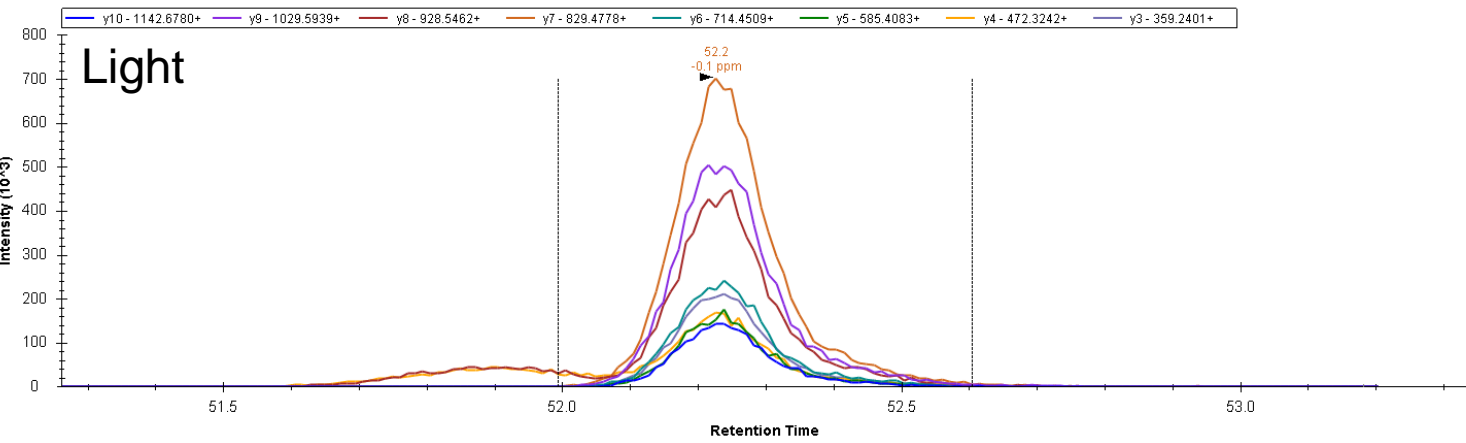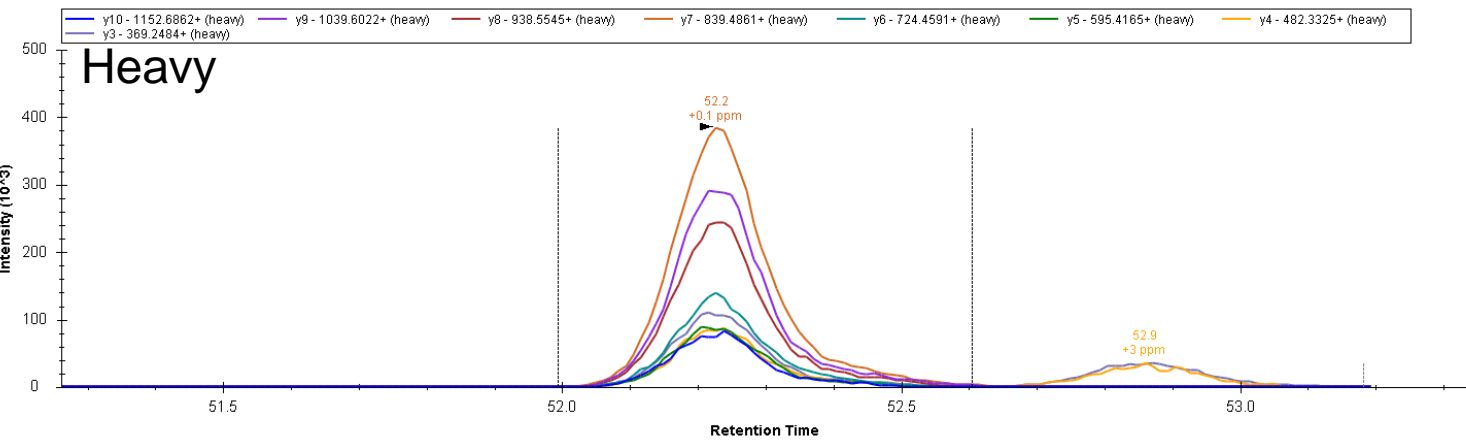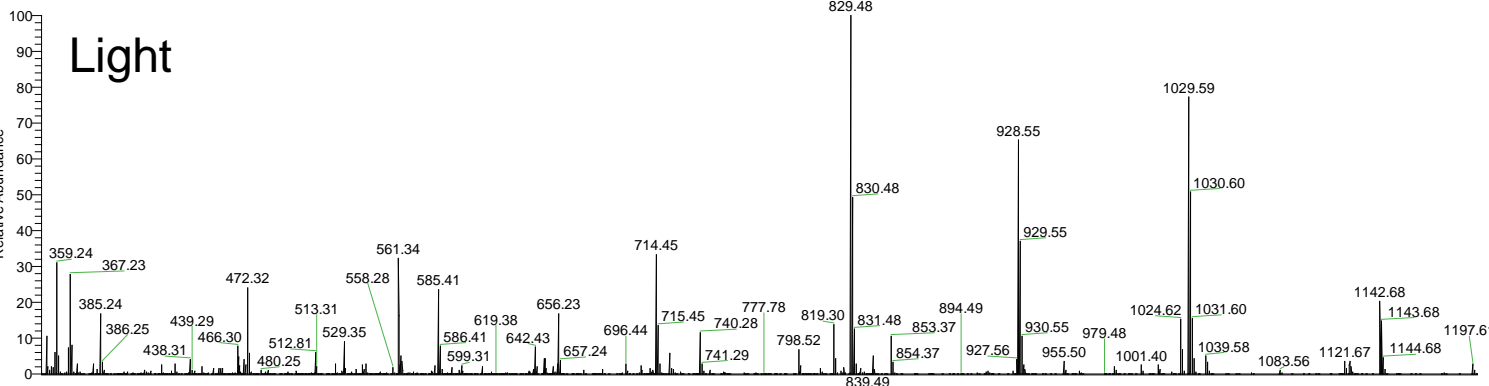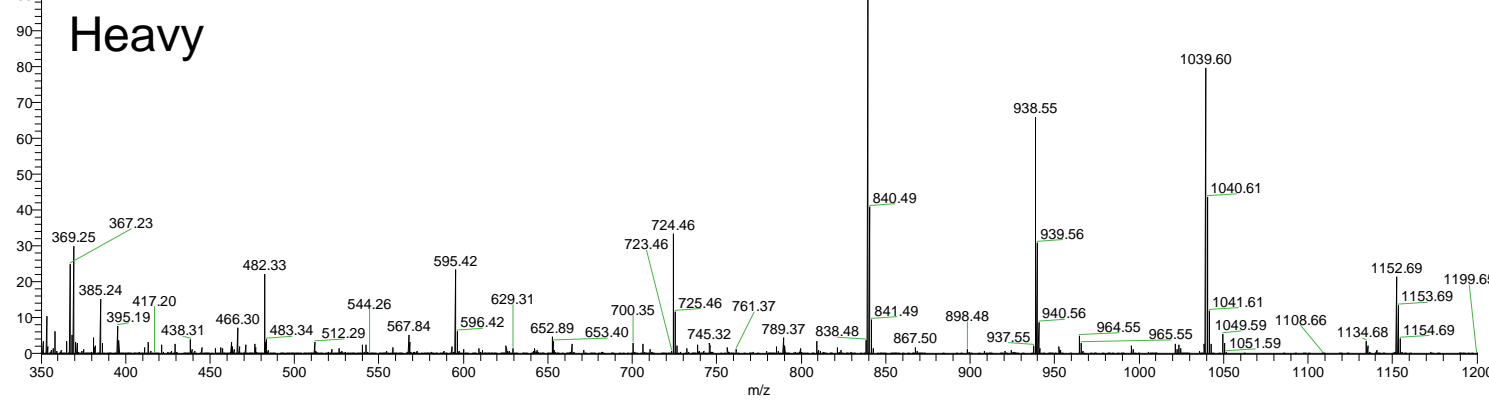

# Aj; LAMP2\_145-152; IPLNDLFR

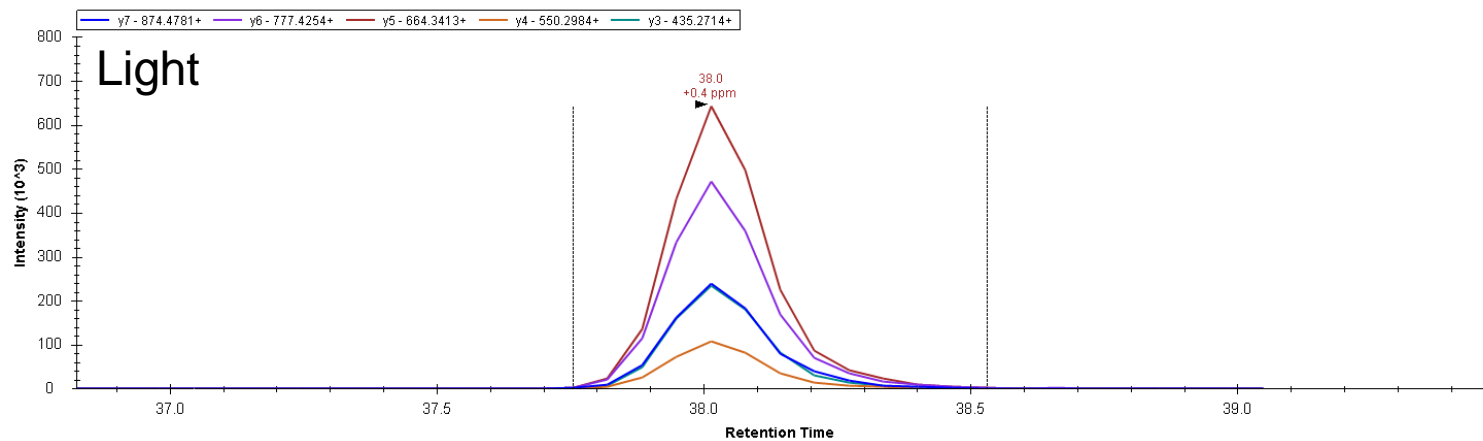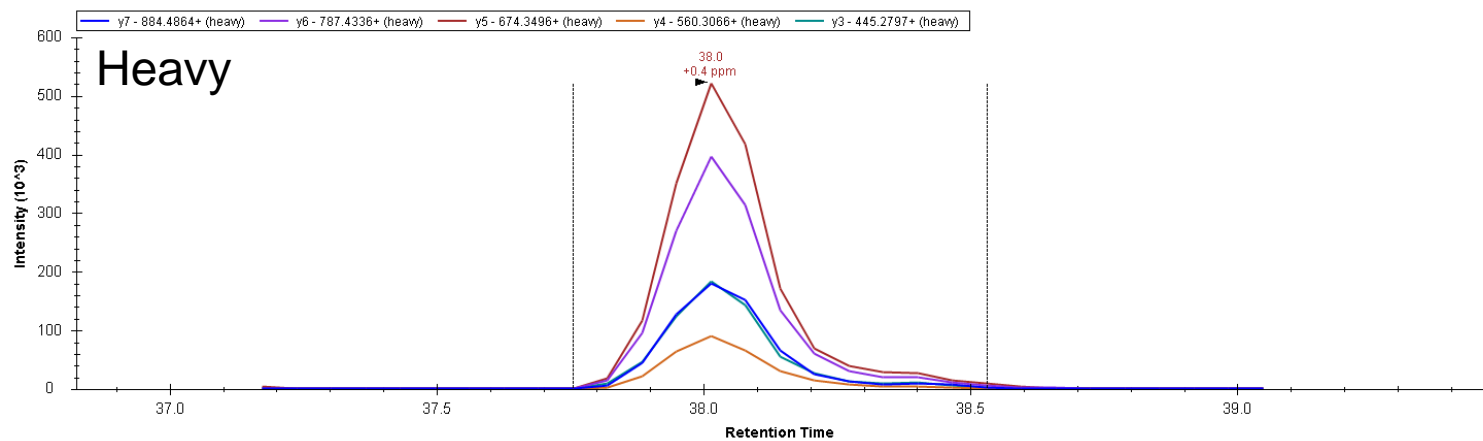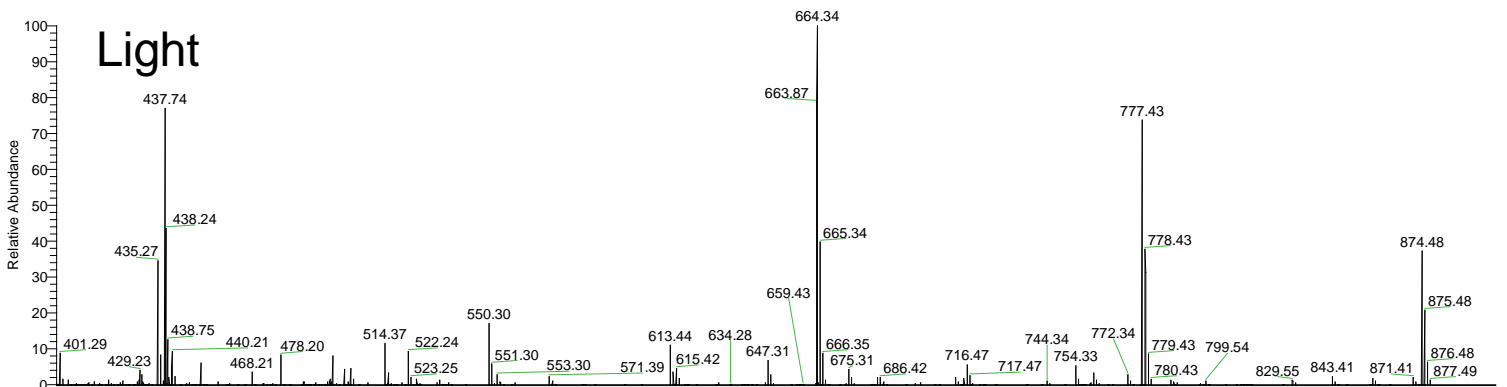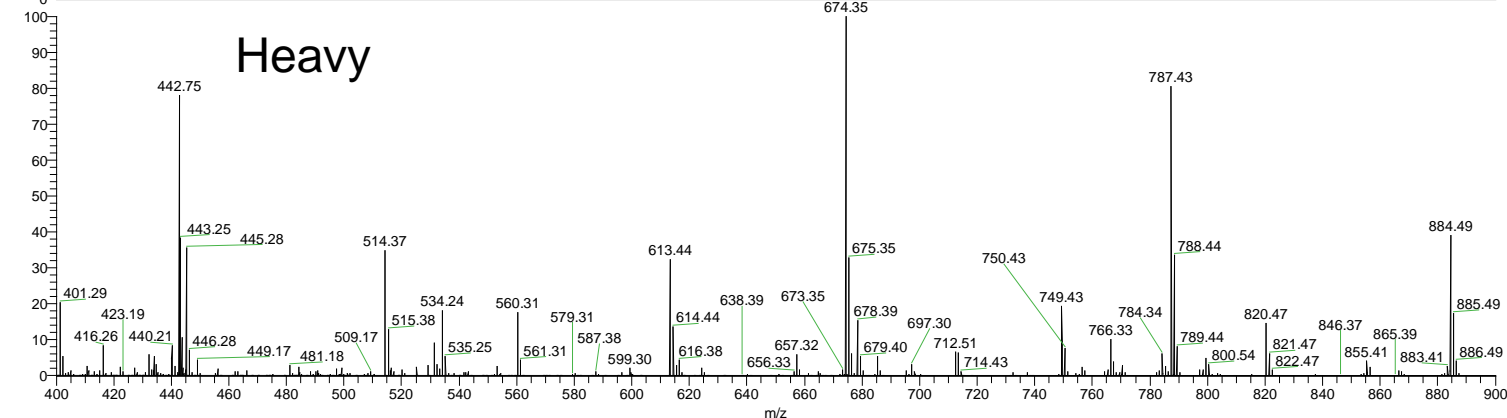

# Ak; LAMP2\_153-161; cNSLSTLEK

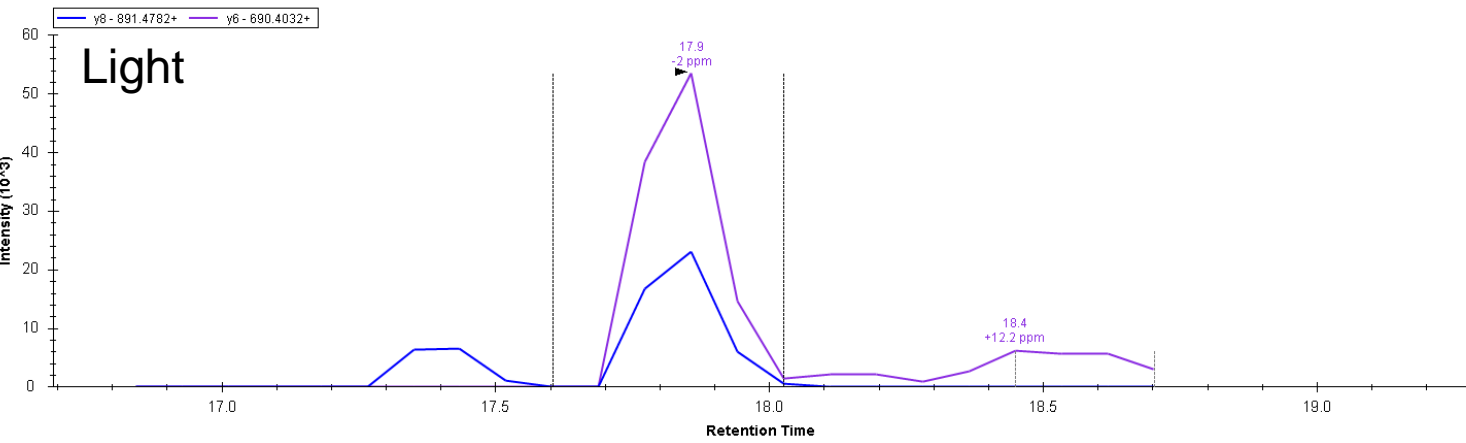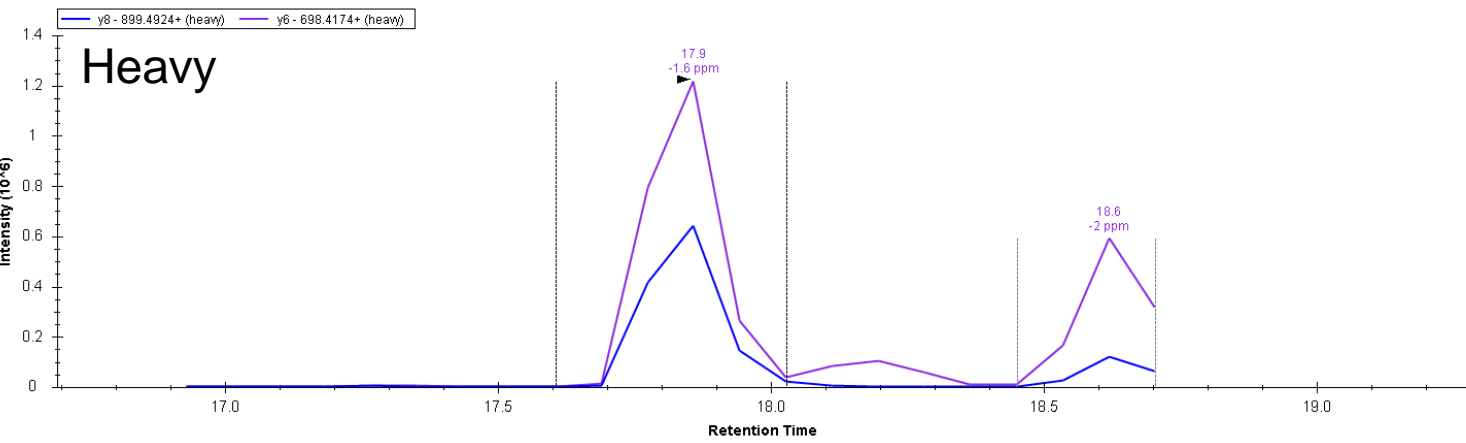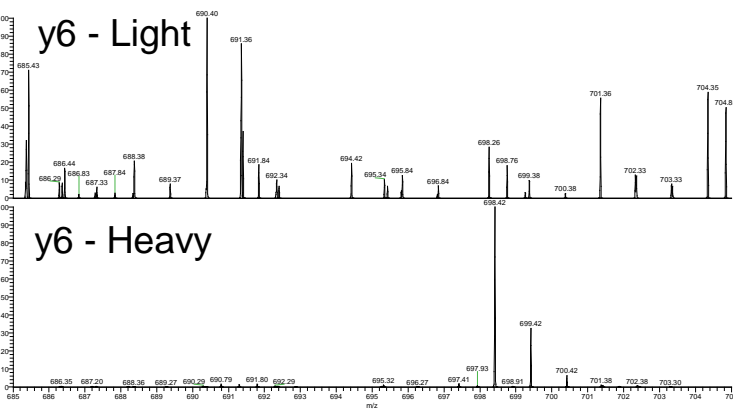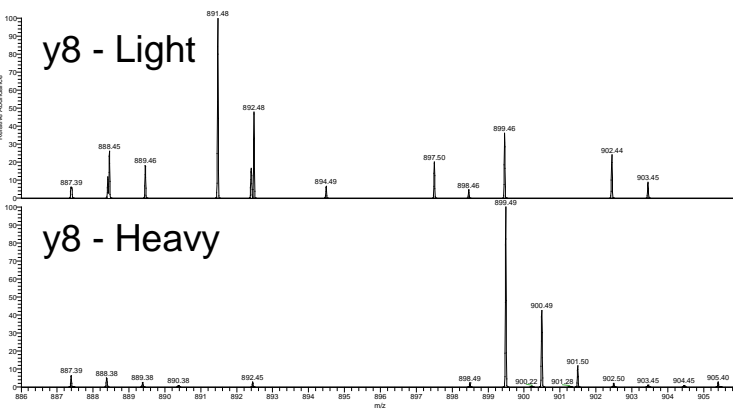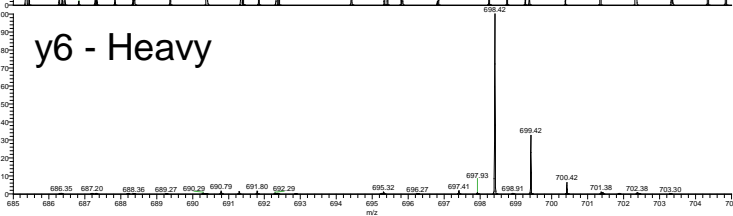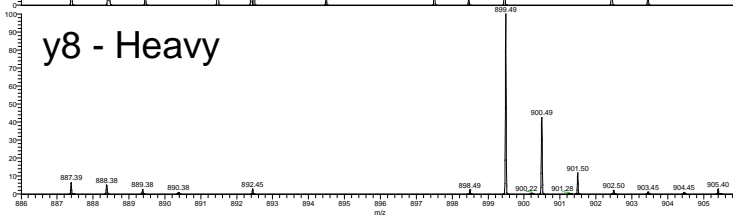

# AI; LAMP2\_281-289; YLDFVFAVK

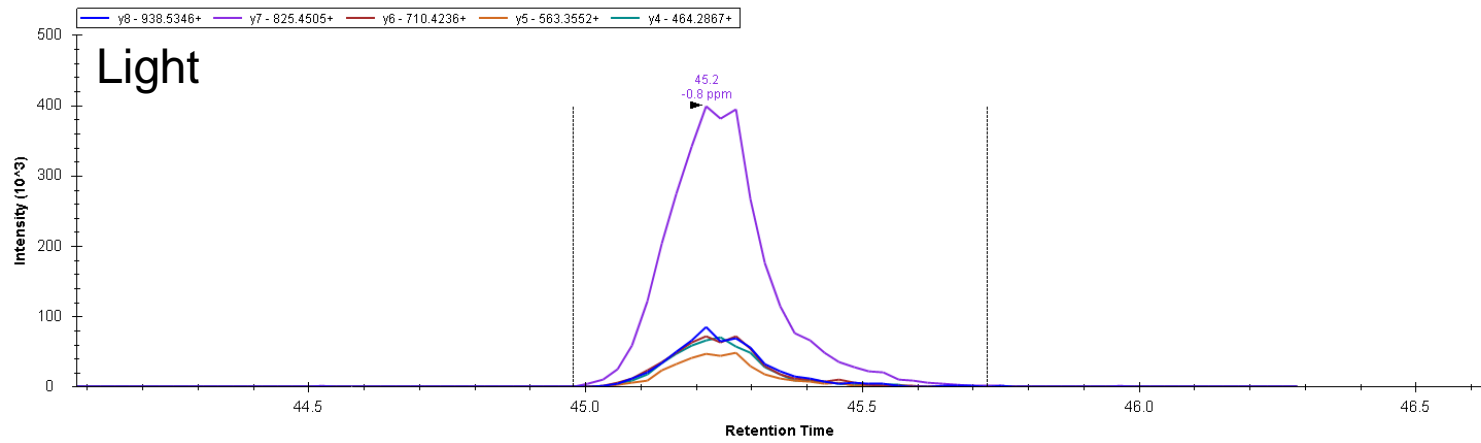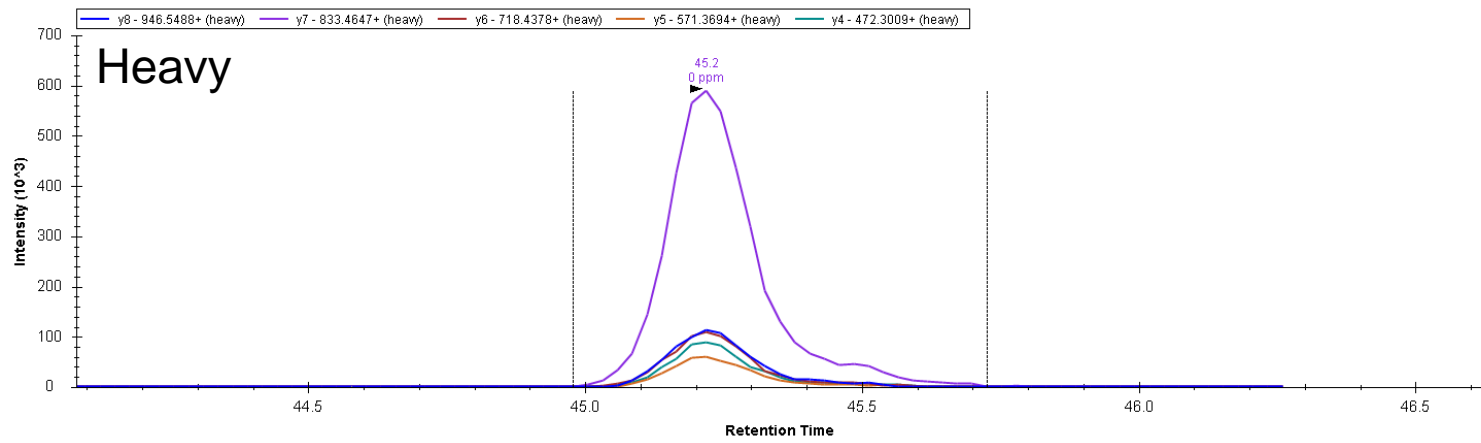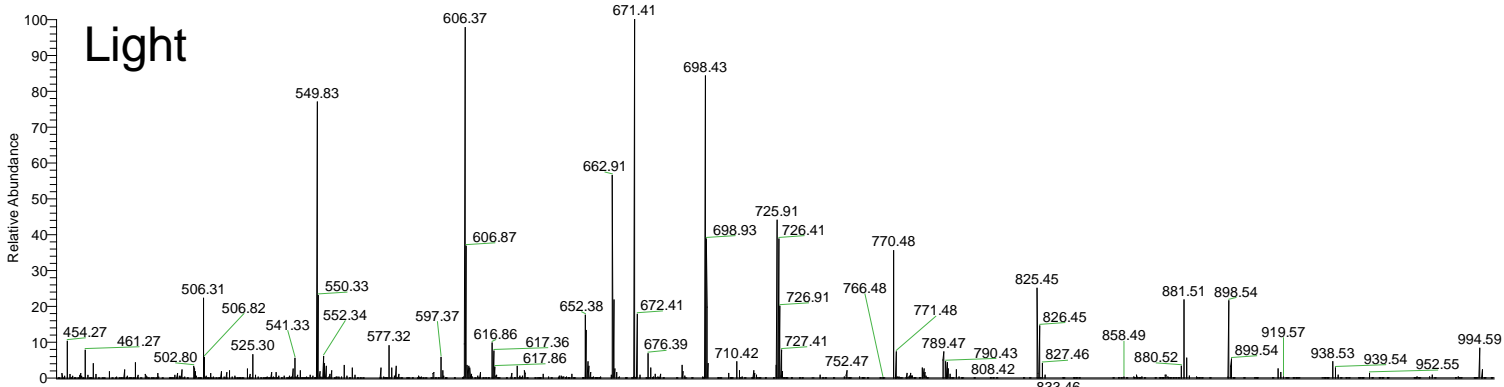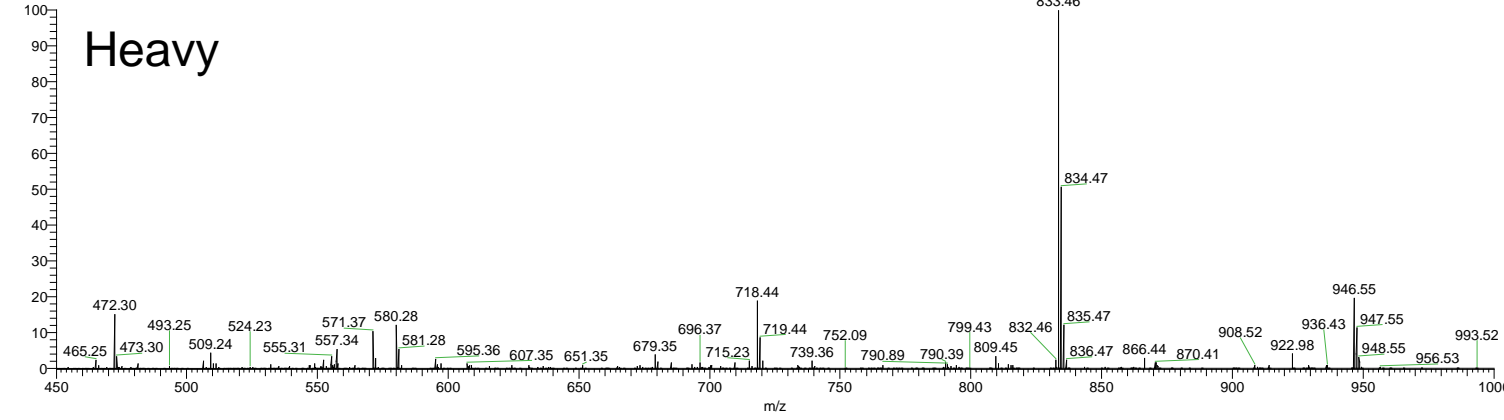



# Am; LYZ\_52-59; WESGYNTR

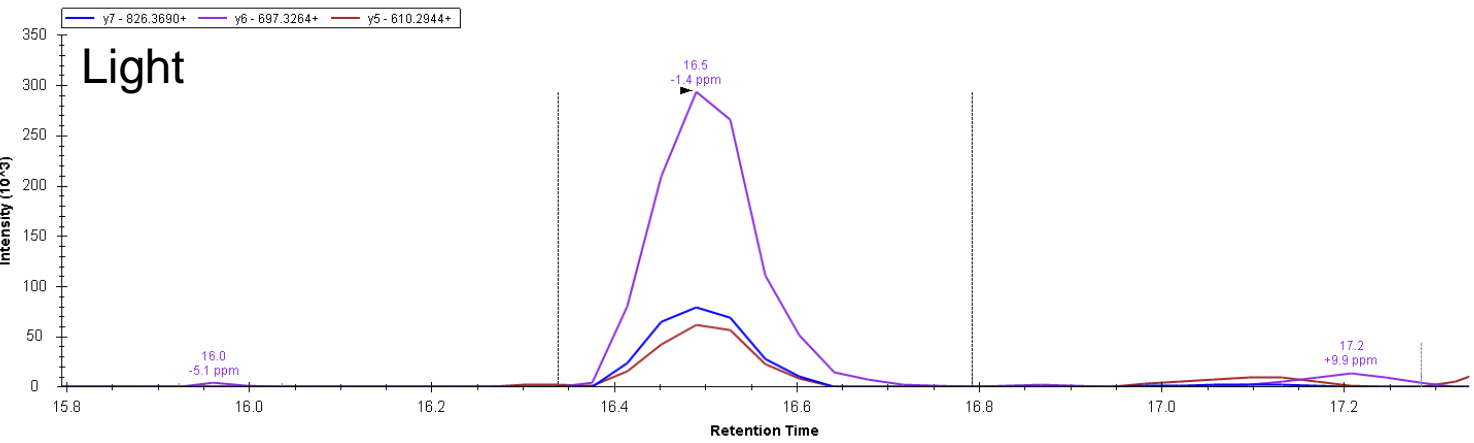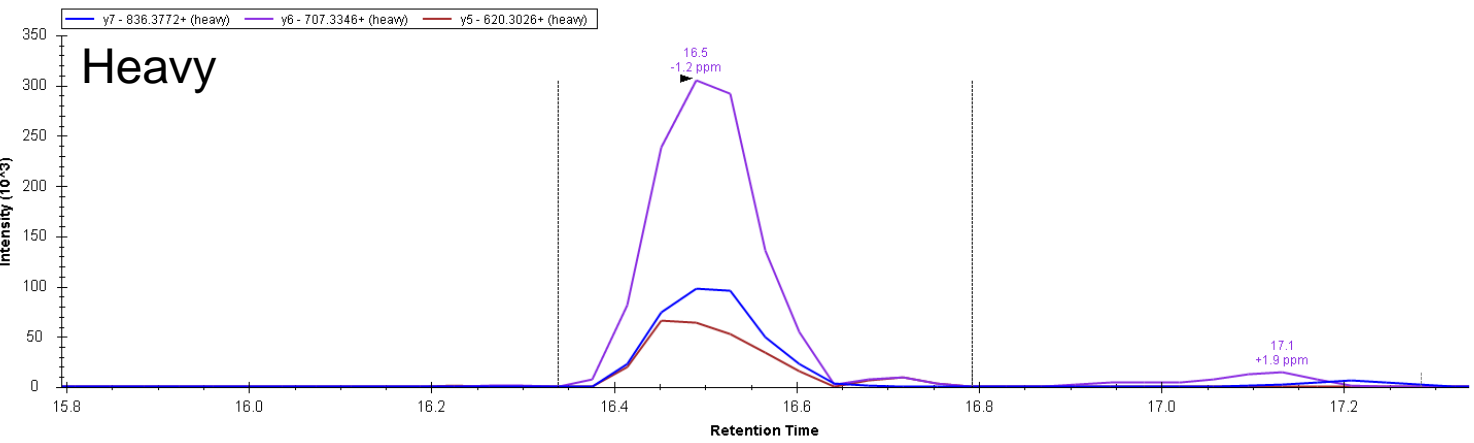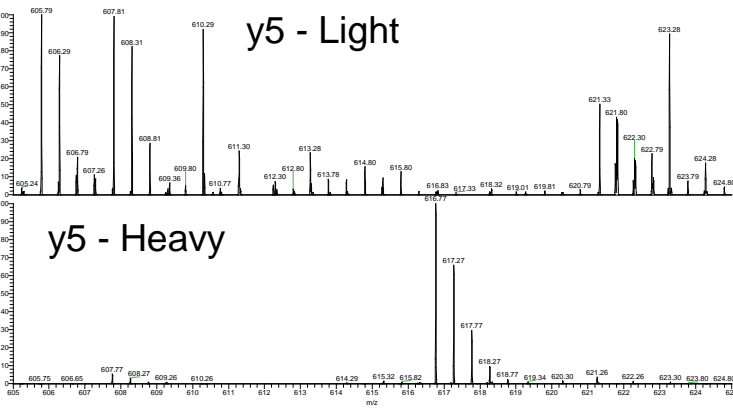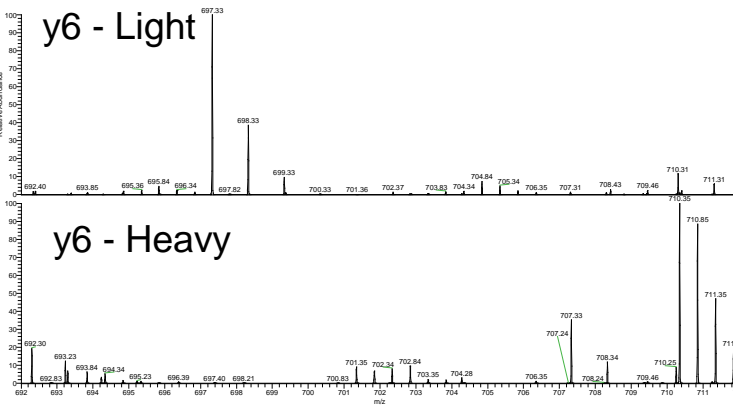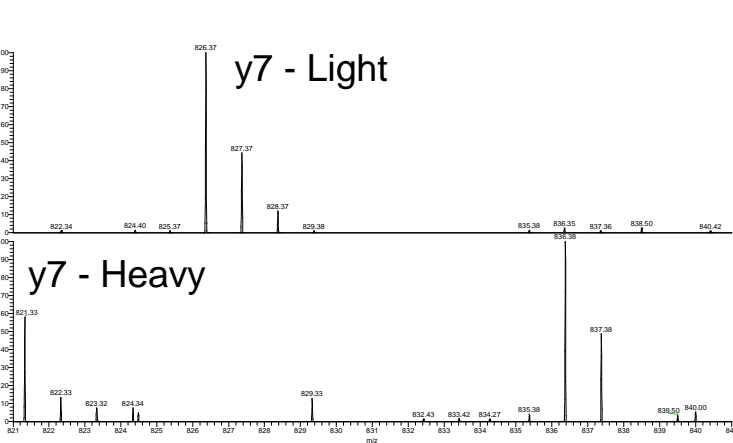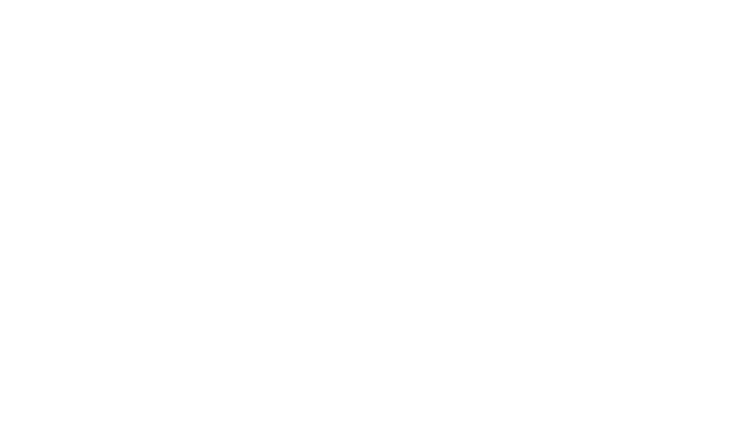

# An; LYZ\_69-80; STDYGIFQINSR

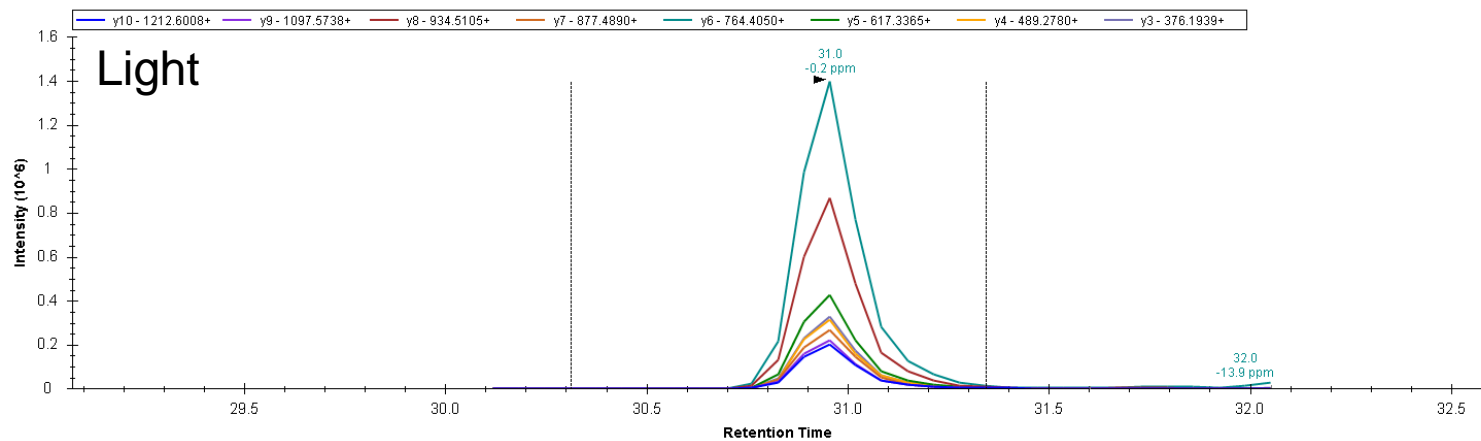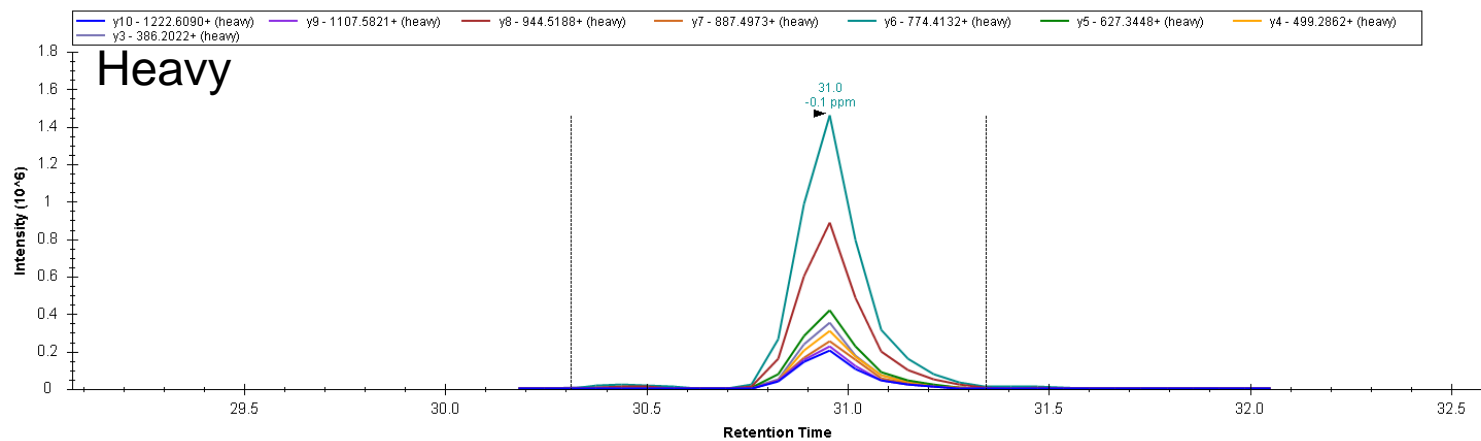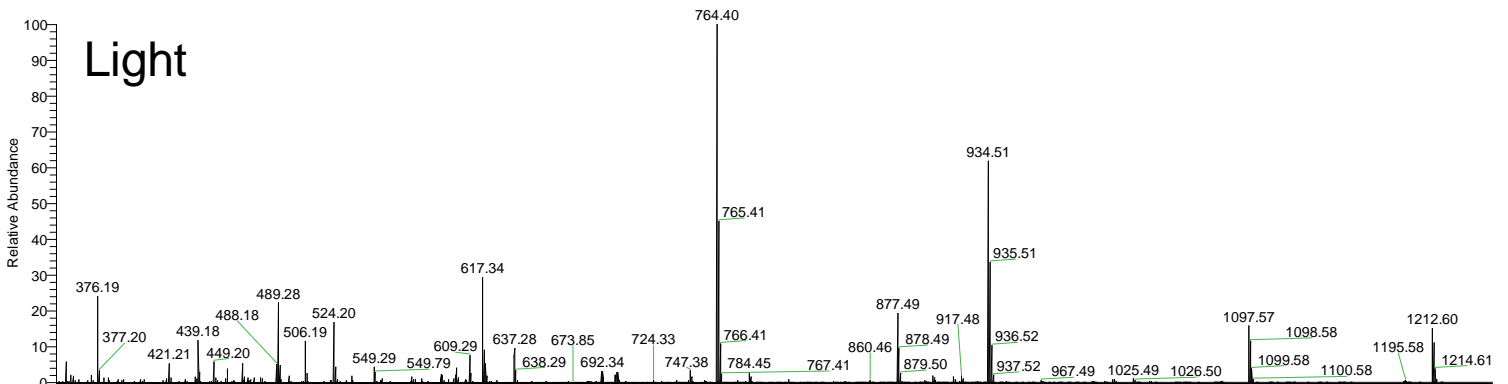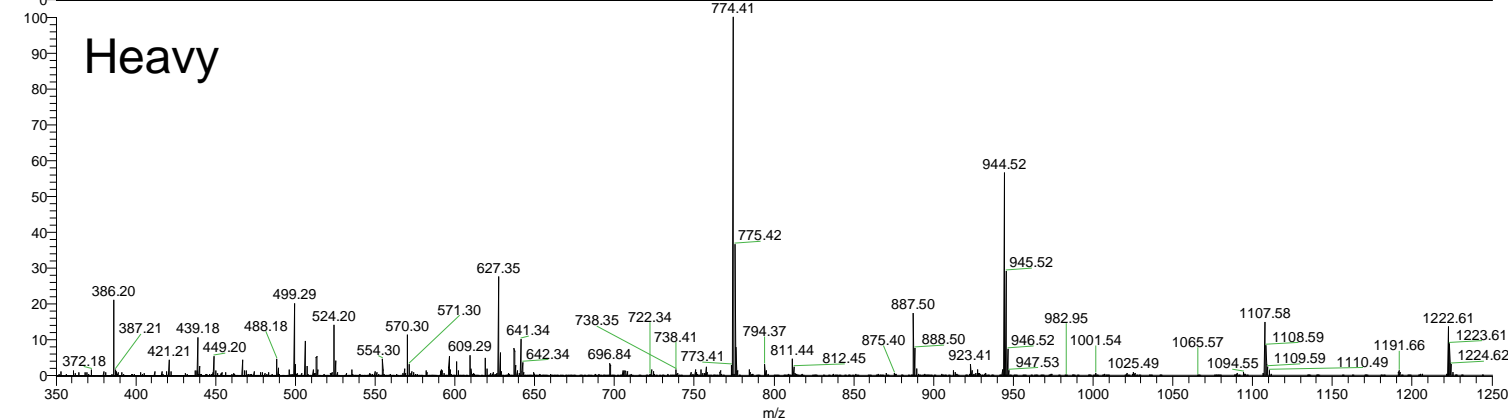

# Ao; FUCA1\_114-130; FFHPEEWADLFQAAGAK

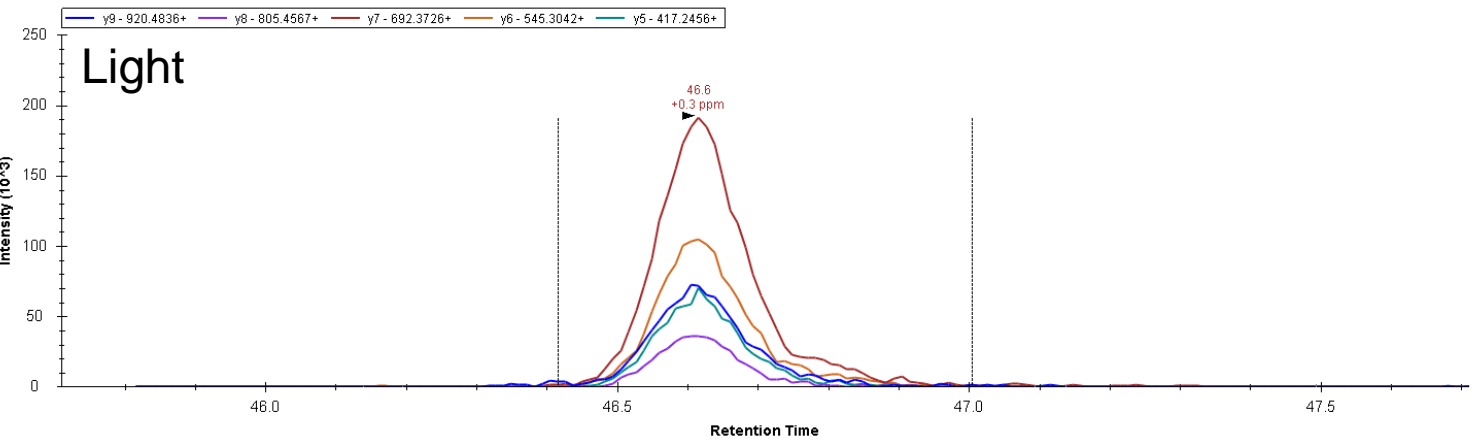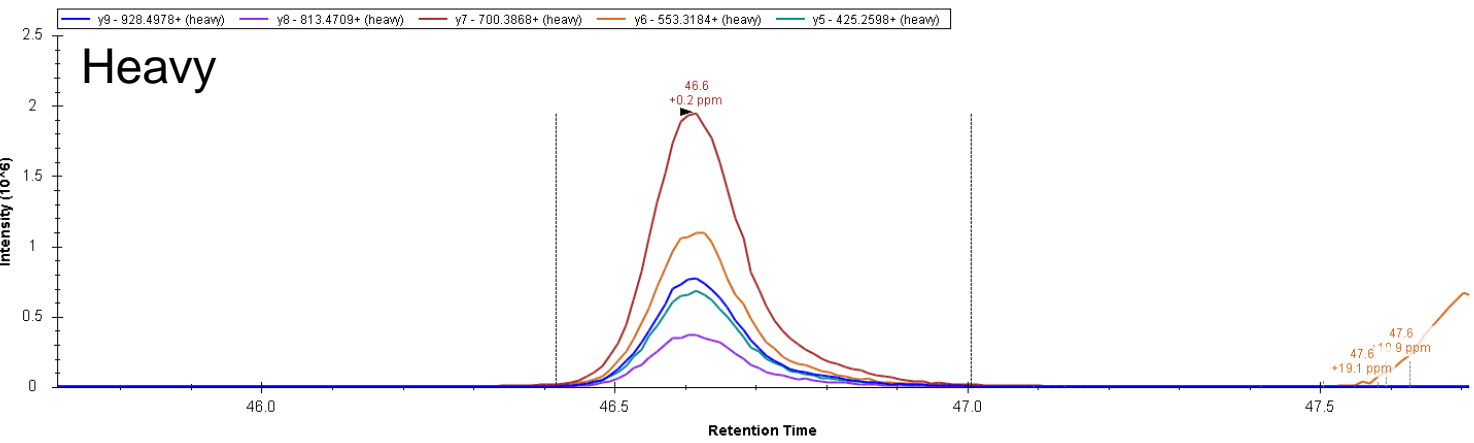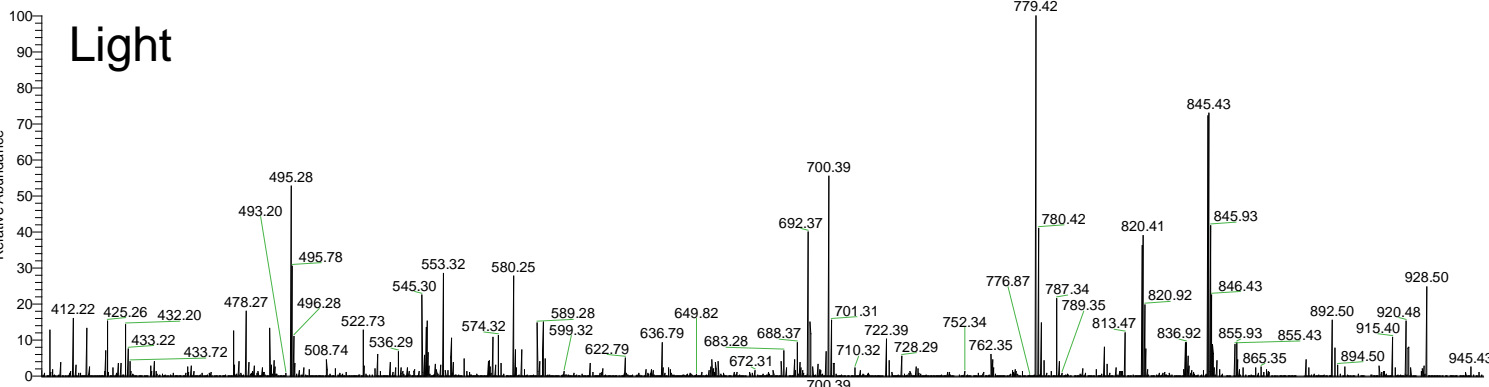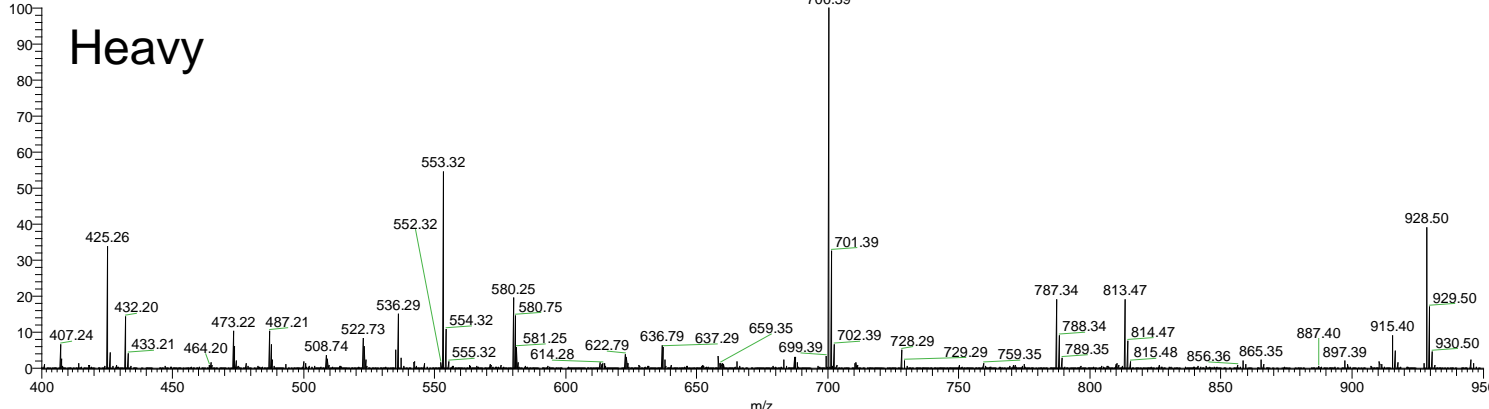

# Ap; FUCA1\_163-173; DLVGELGTALR

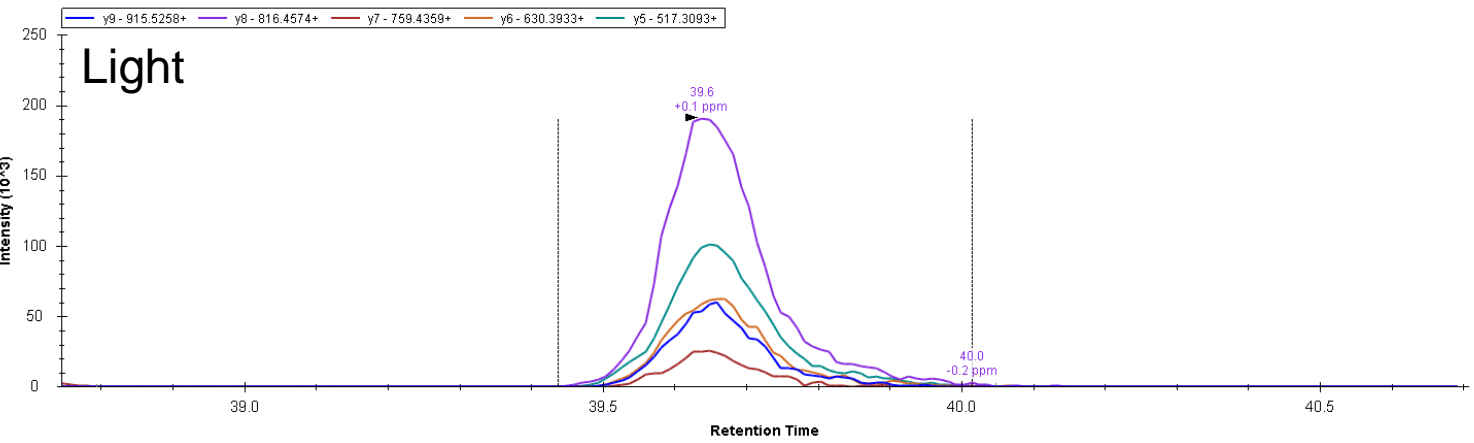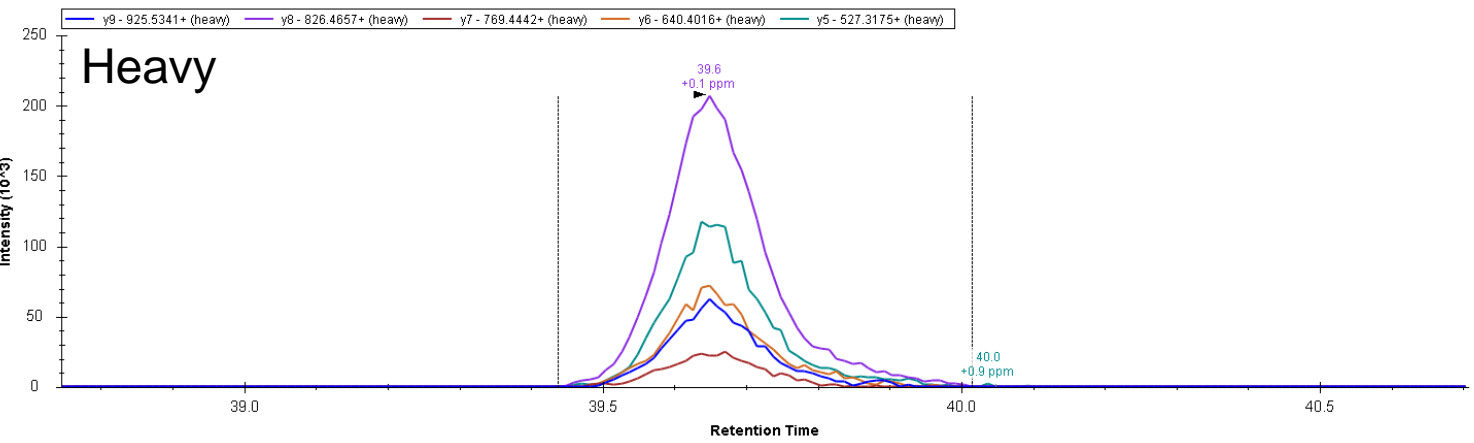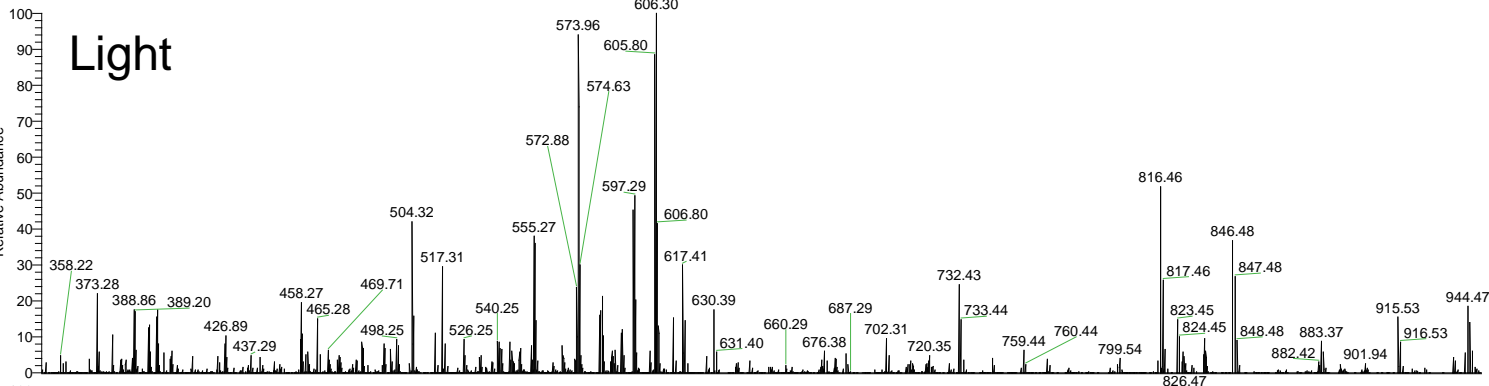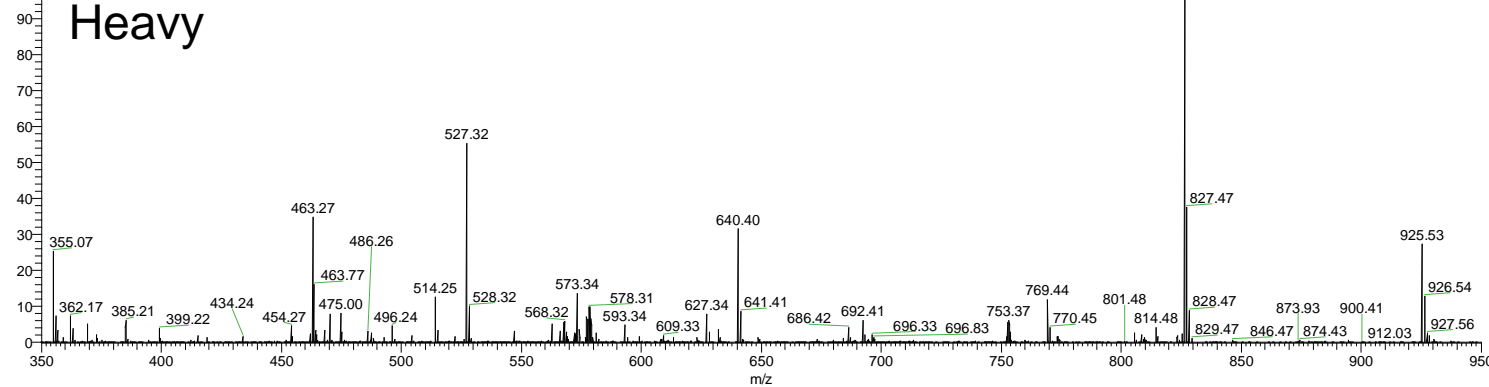

# Aq; FUCA1\_344-354; DGLIVPIFQER

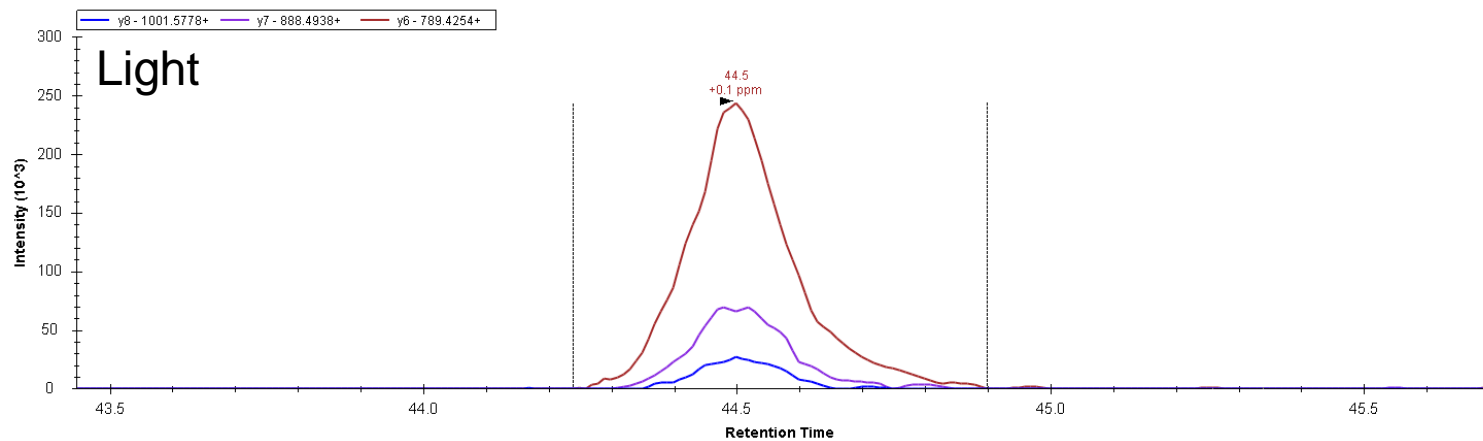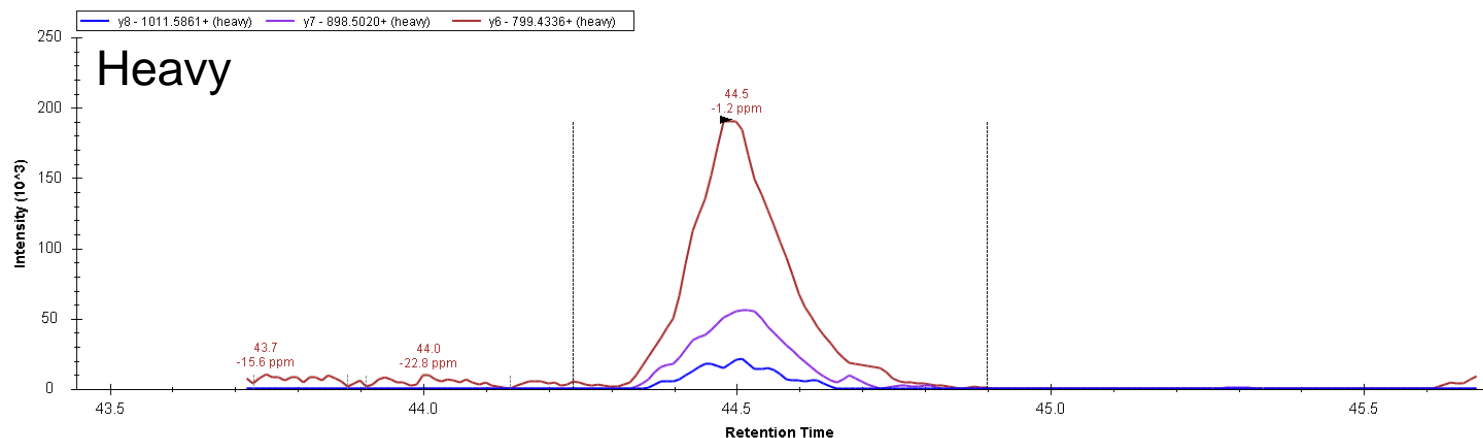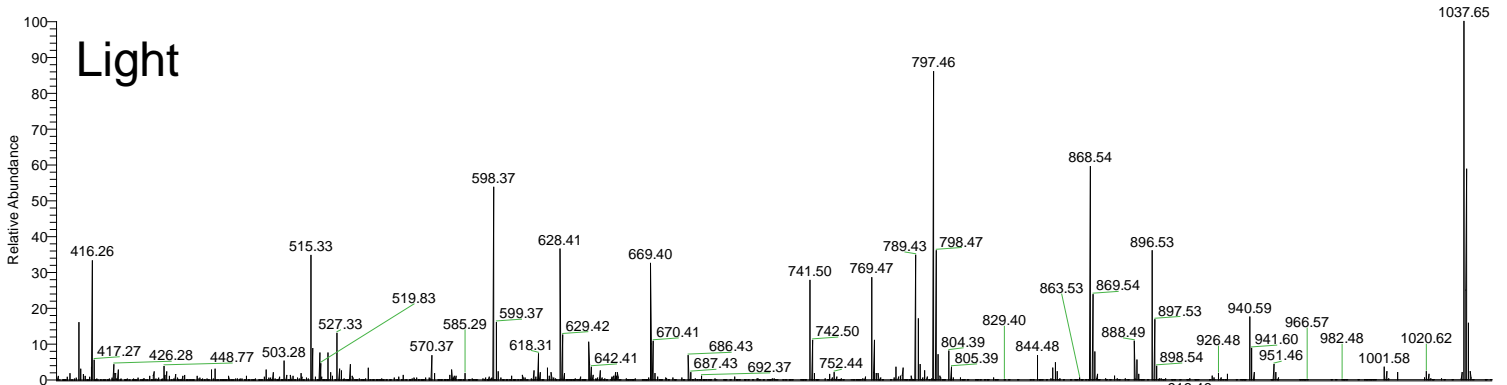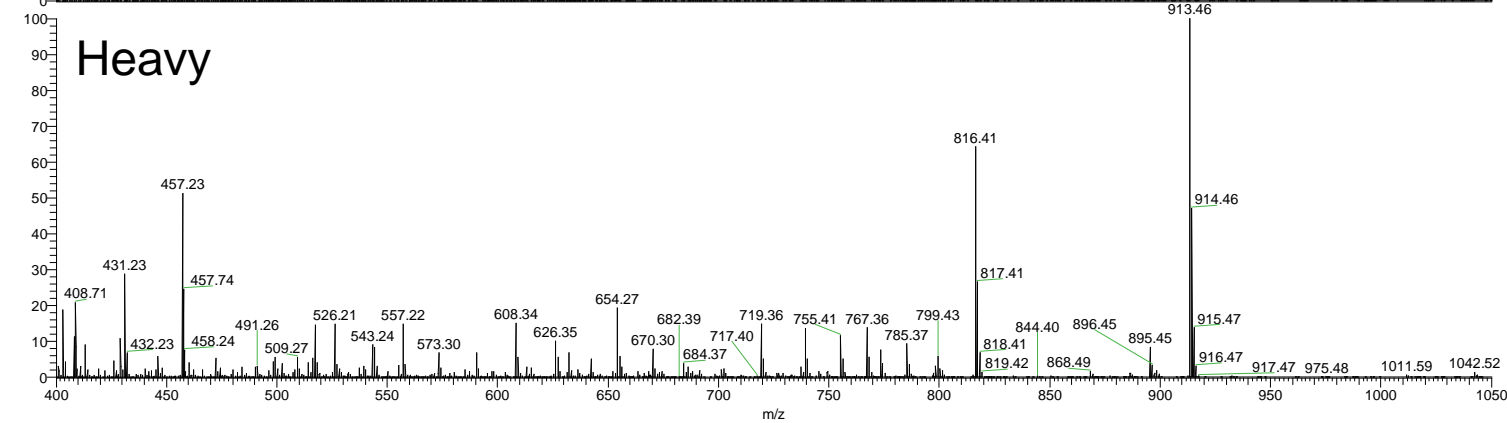

# Ar; TCN2\_45-49; LSLEHLNPSIYVGLR

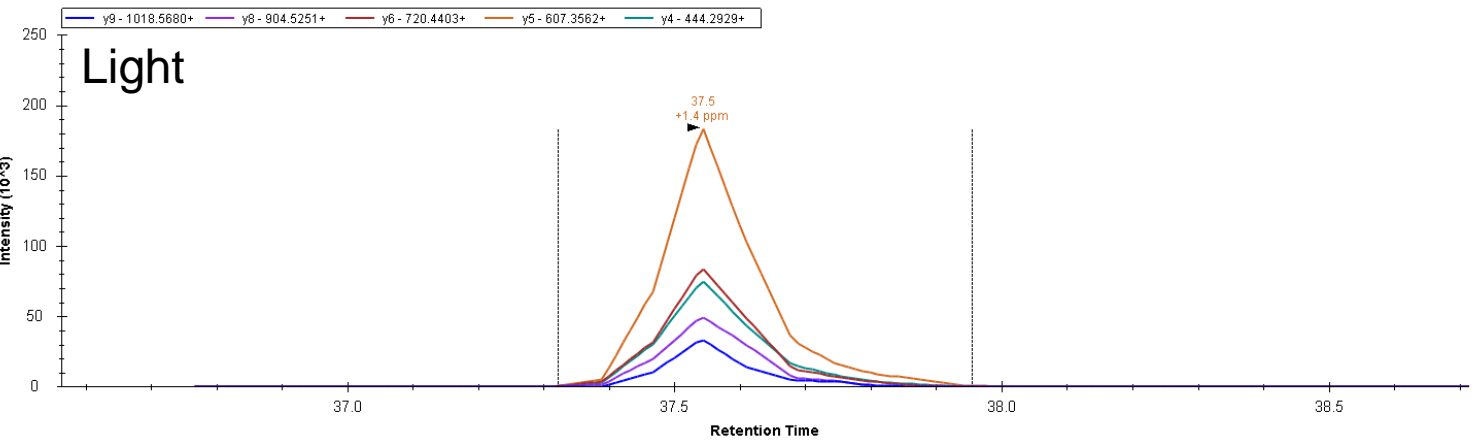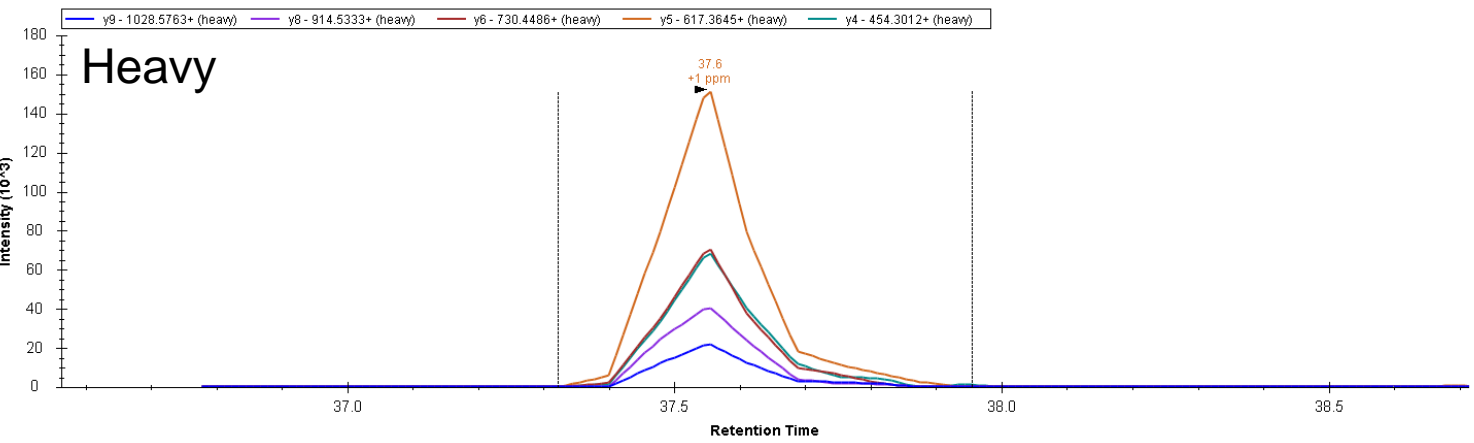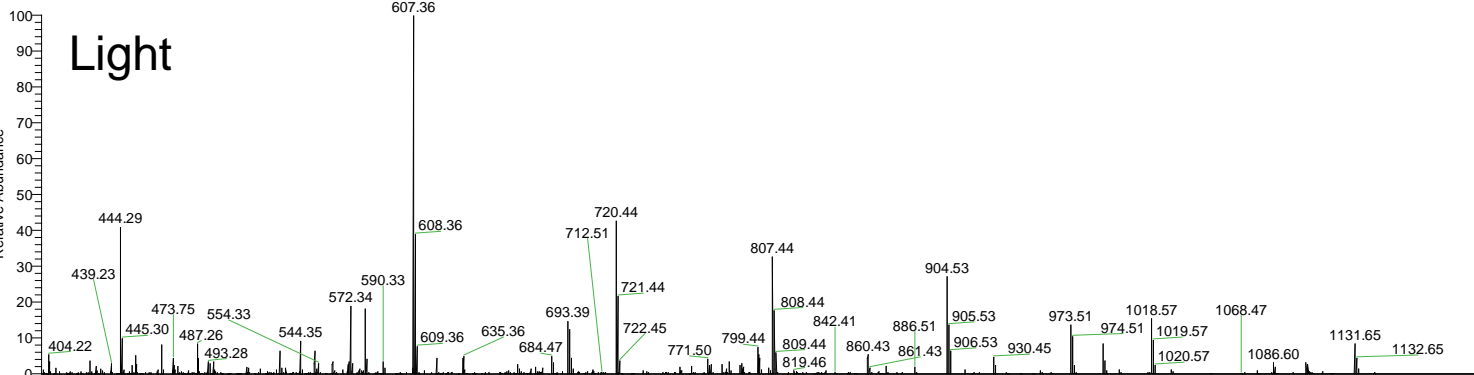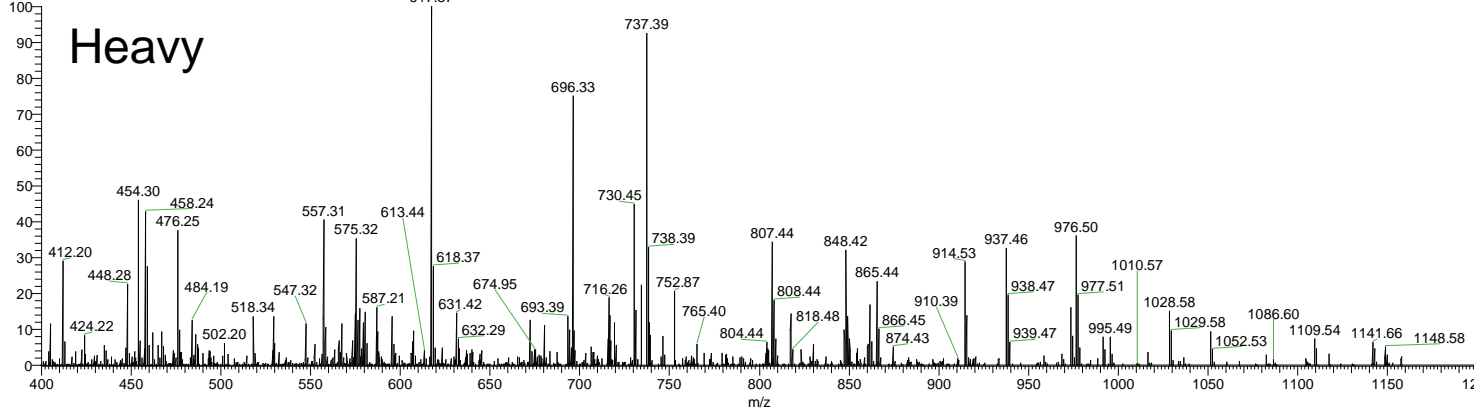

# As; TCN2\_300-313; TYIDLIFPDcLAPR

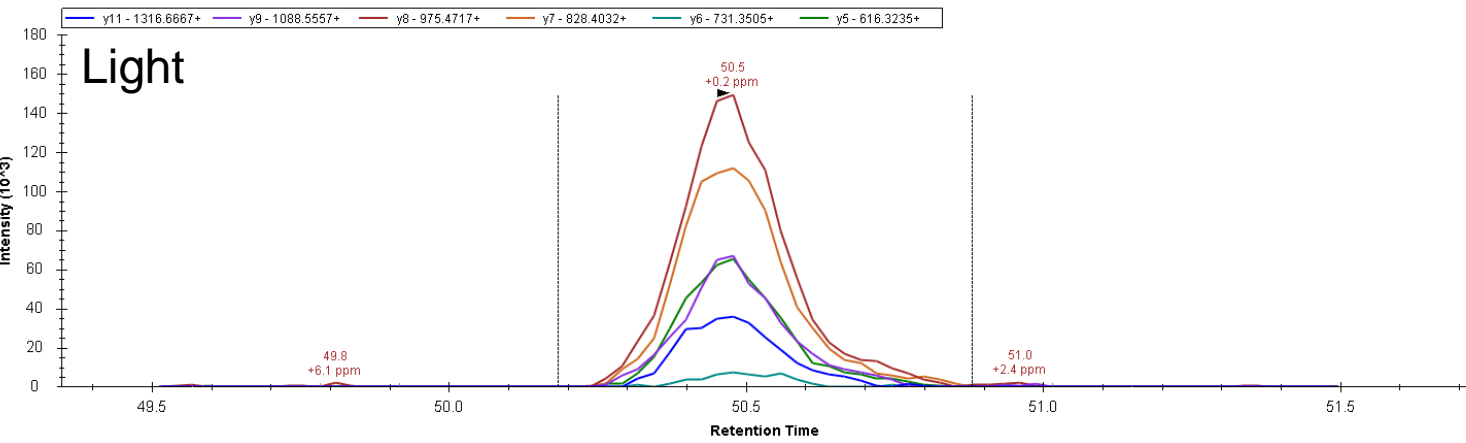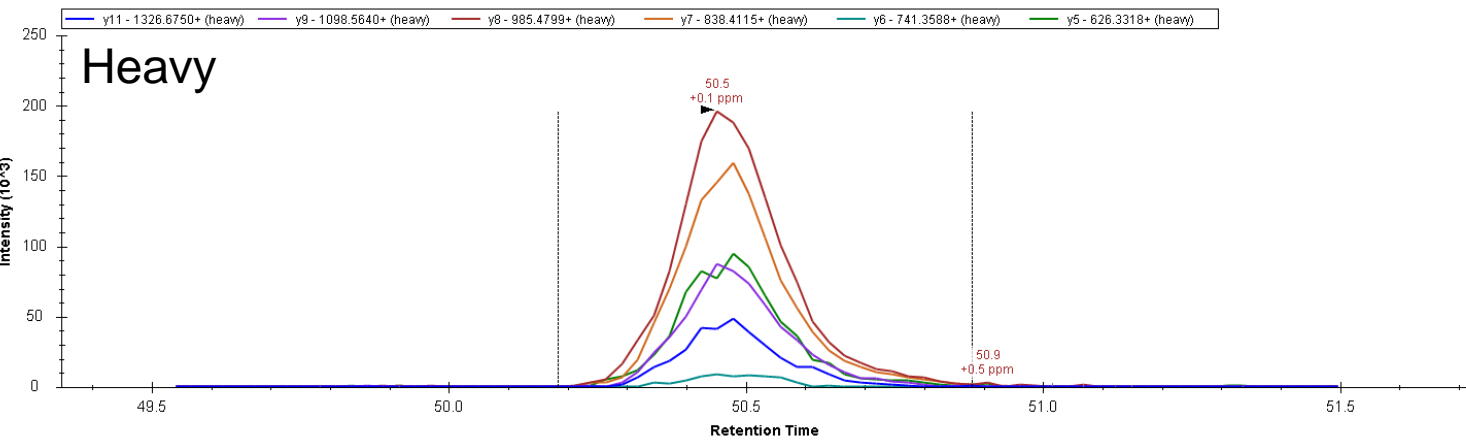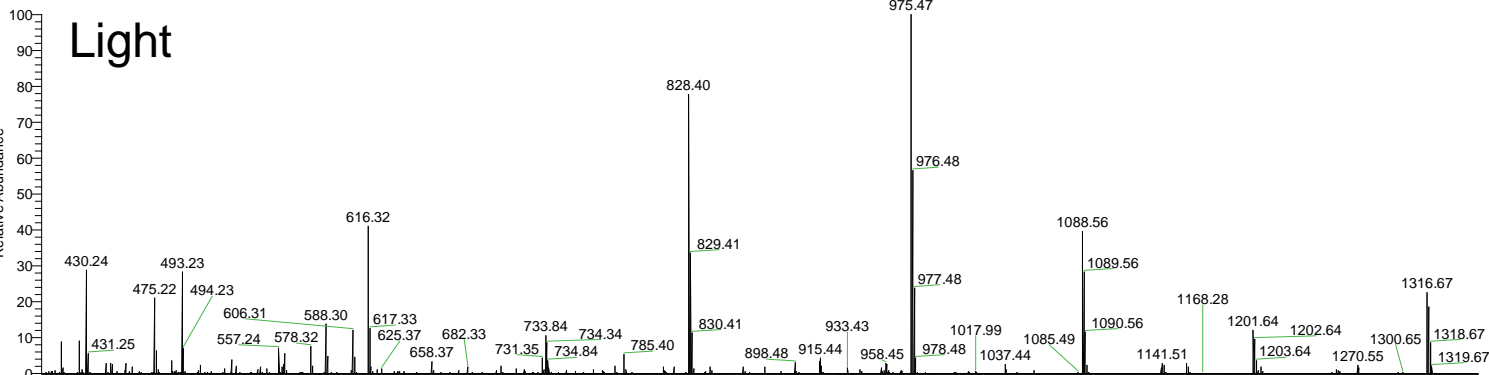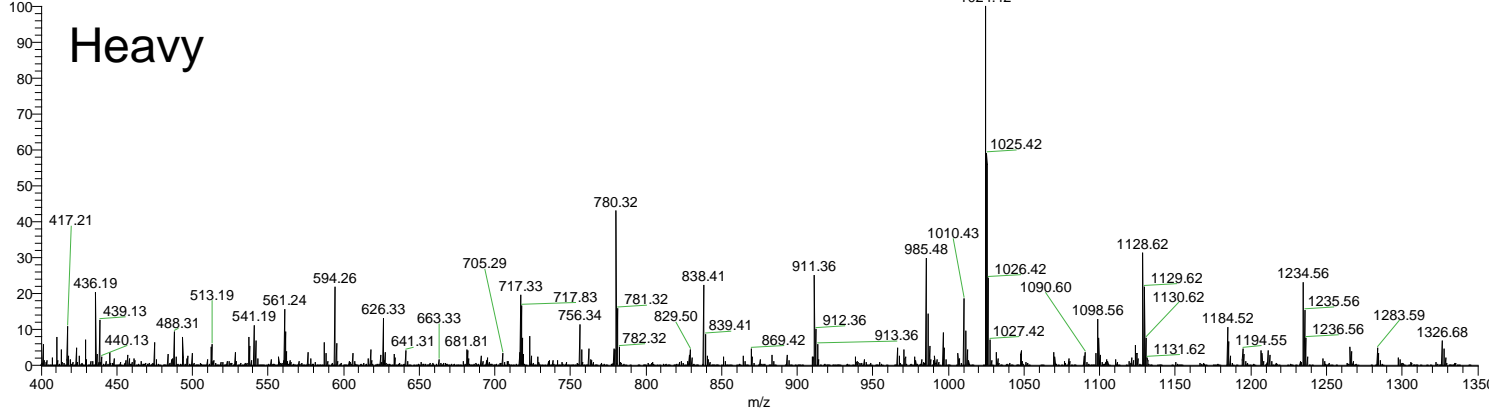

# At; TCN2\_393-399; EFWQLLR

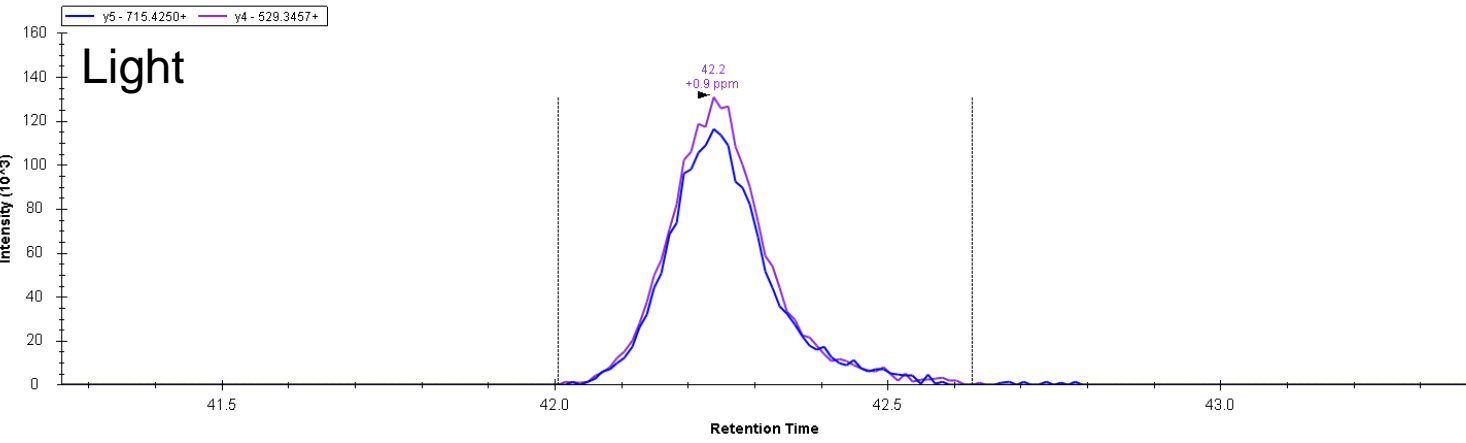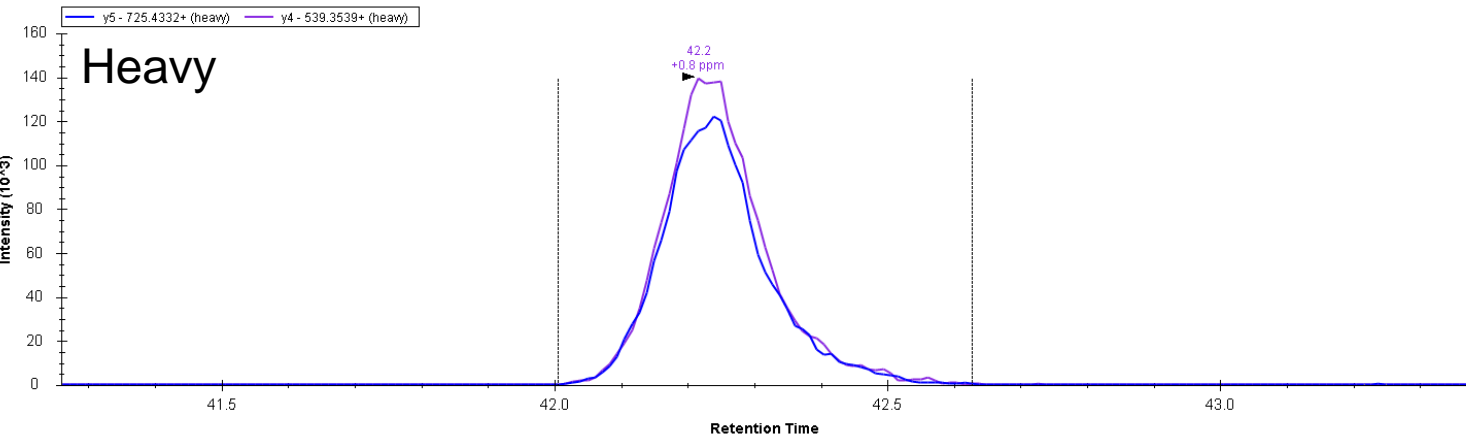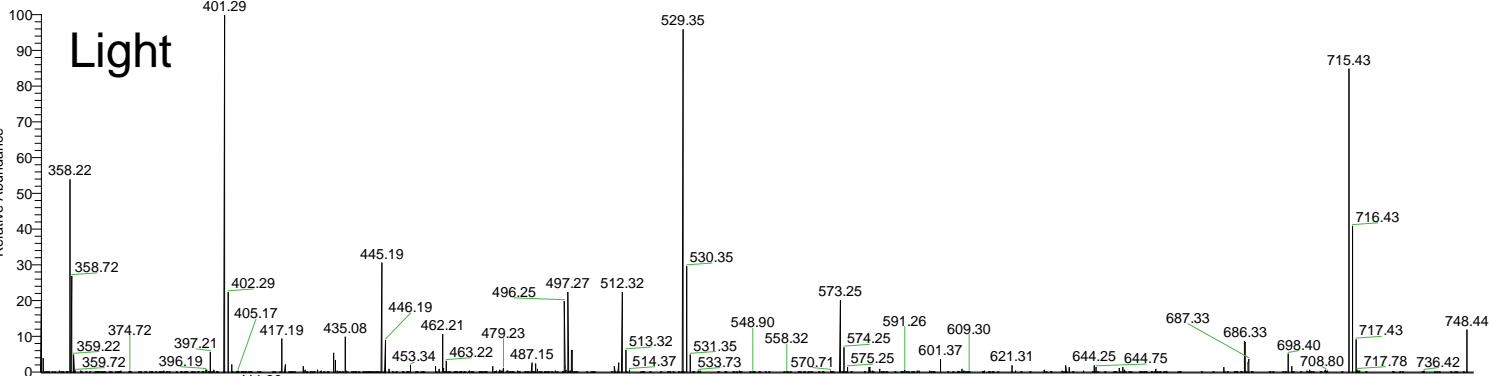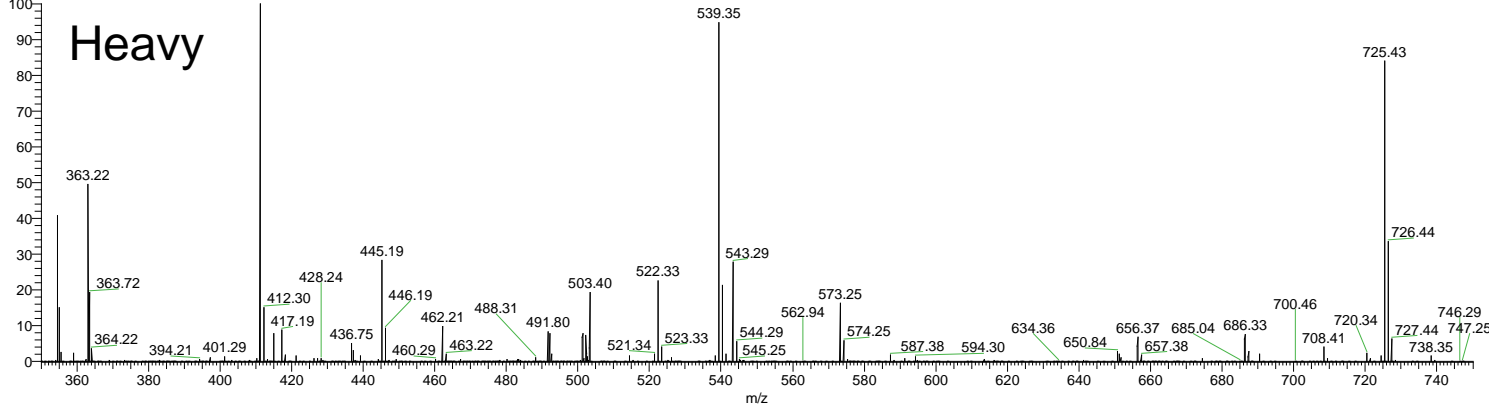



# Au; TPP1\_61-78; LSELVQAVSDPSSPQYGK

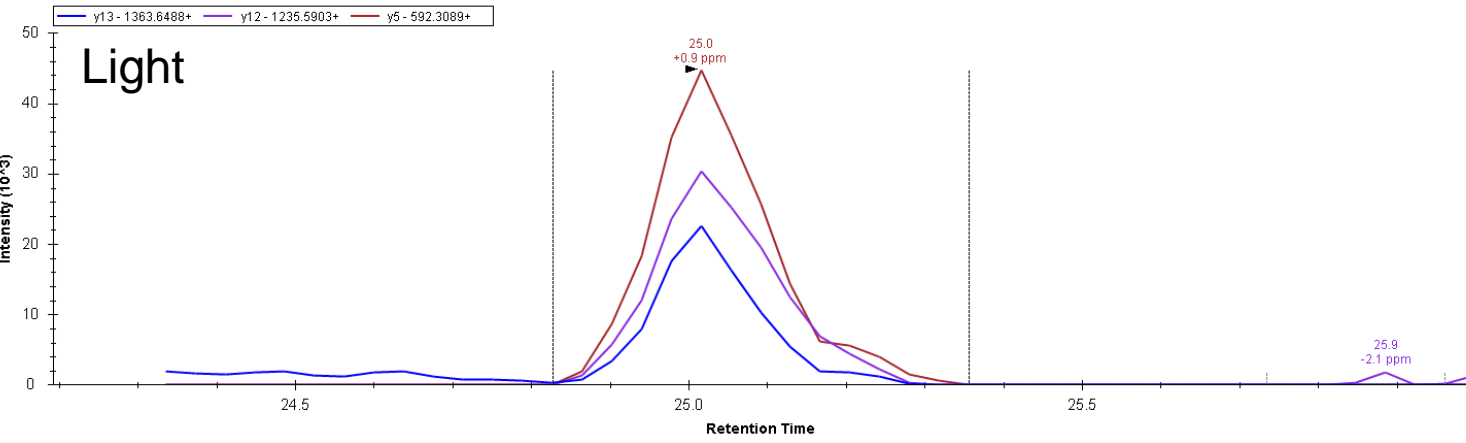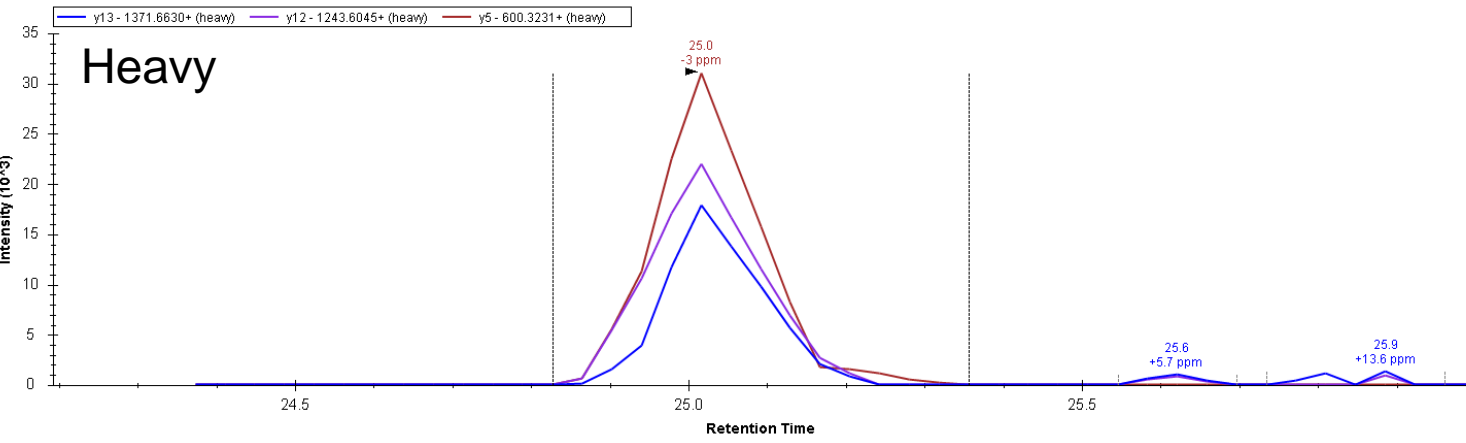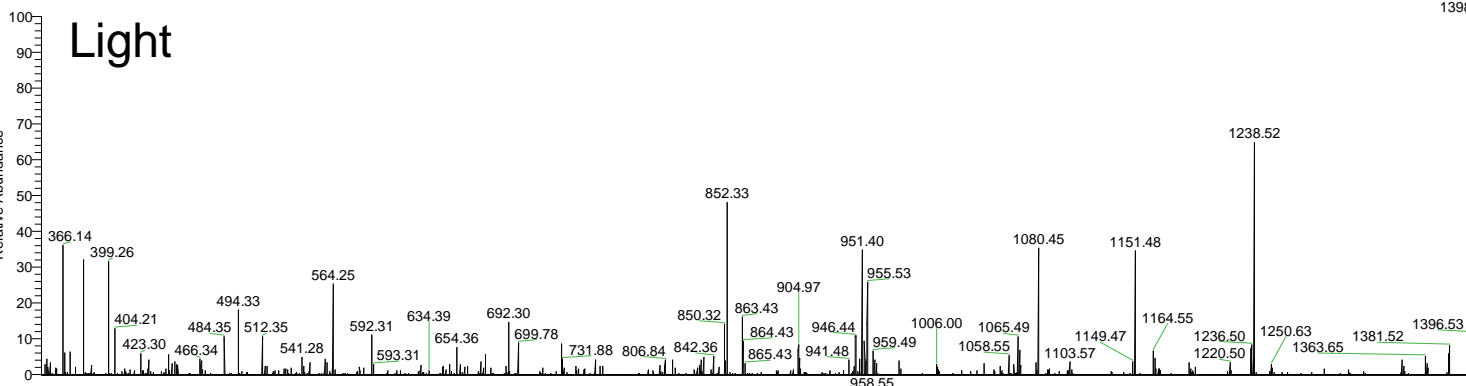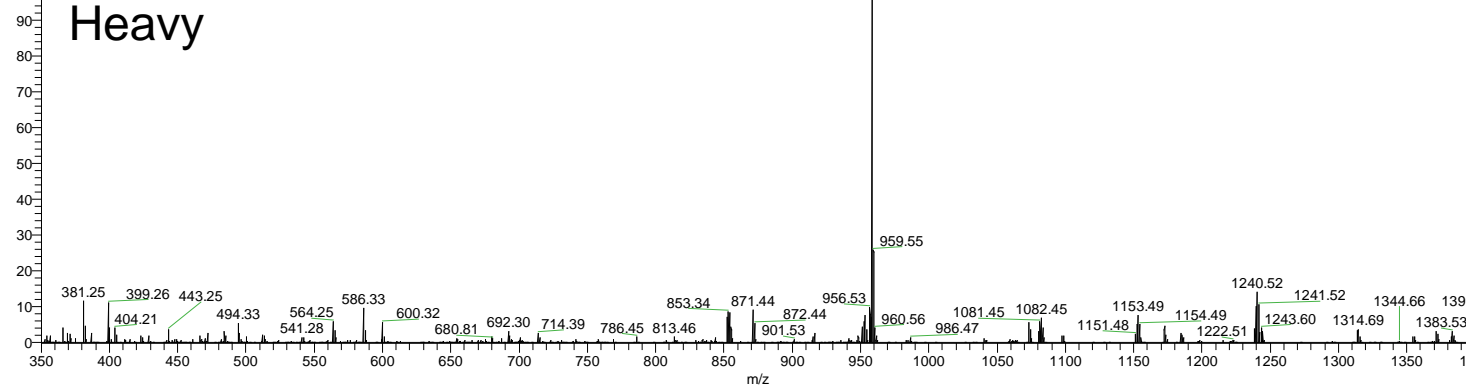

# Av; TPP1\_246-259; LFGGNFAHQASVAR

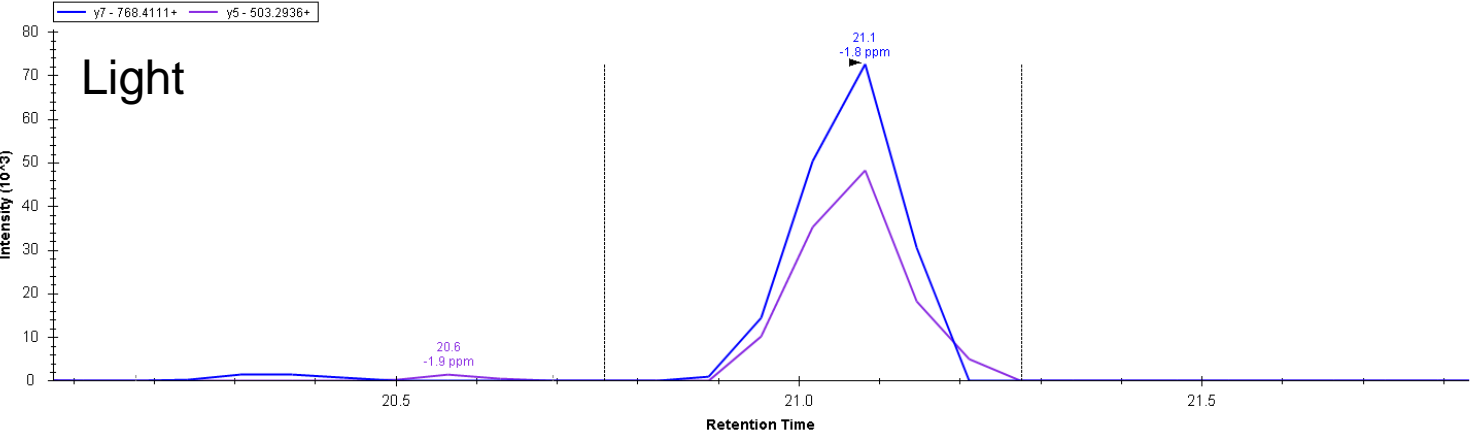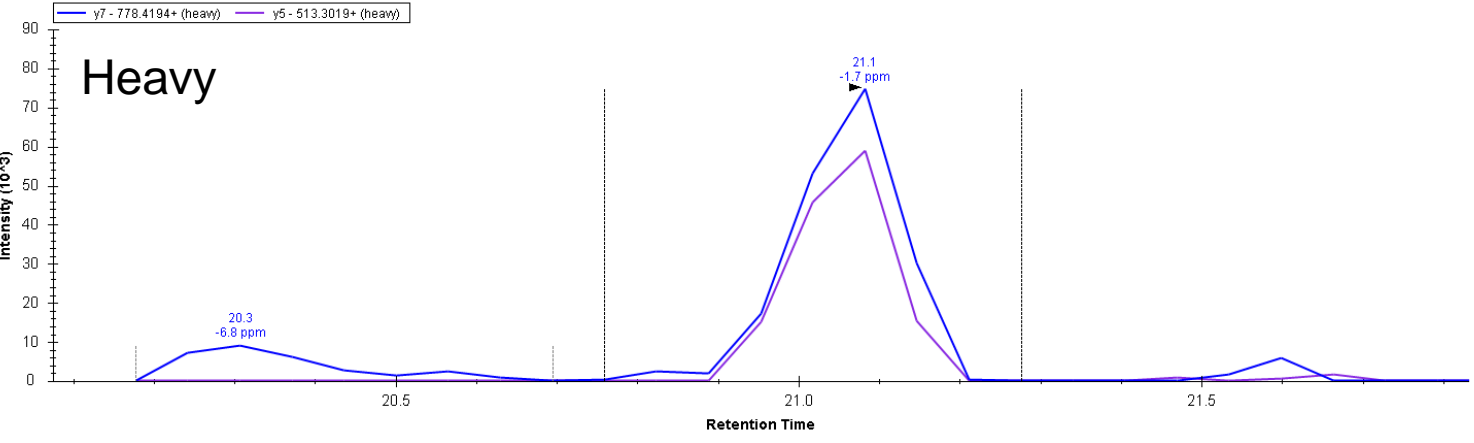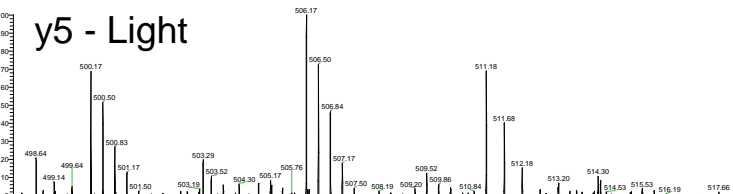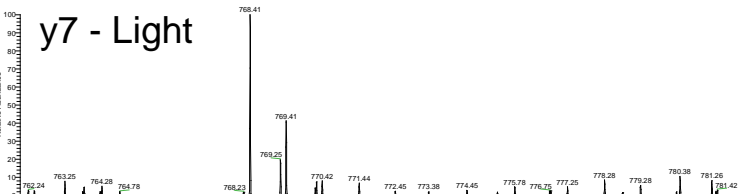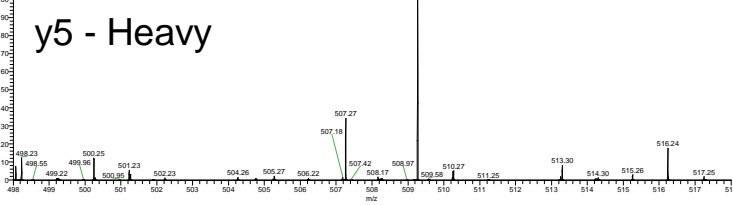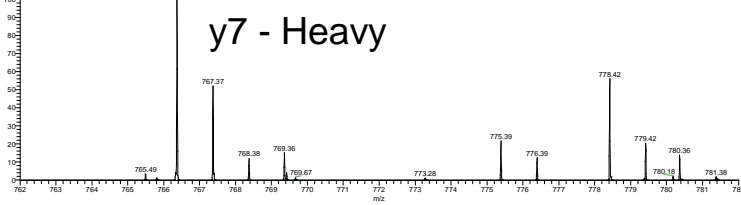

# Aw; TPP1\_507-520; LYQQHGAGLFDVTR

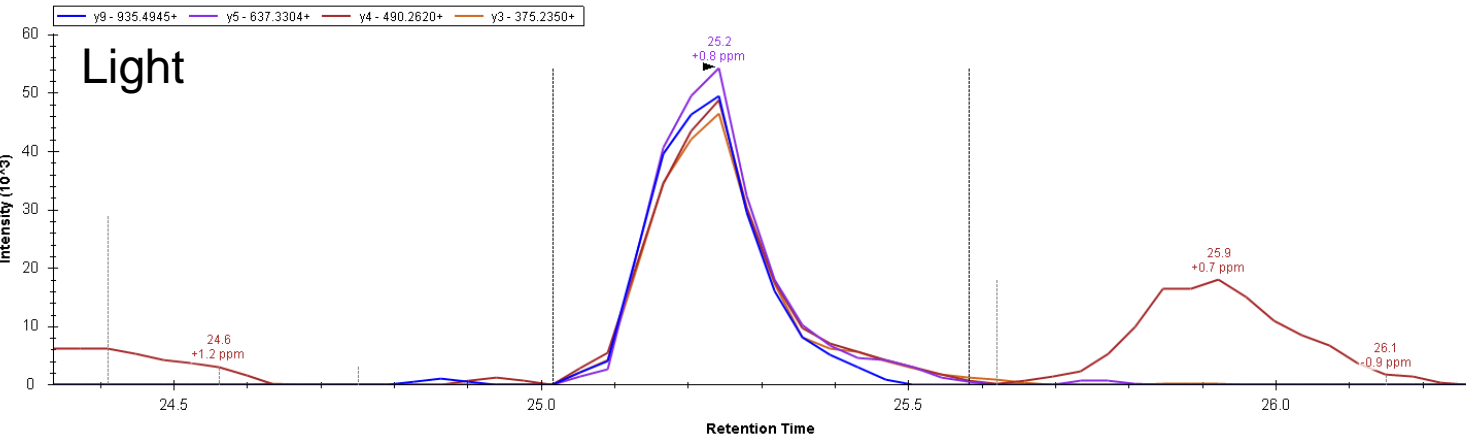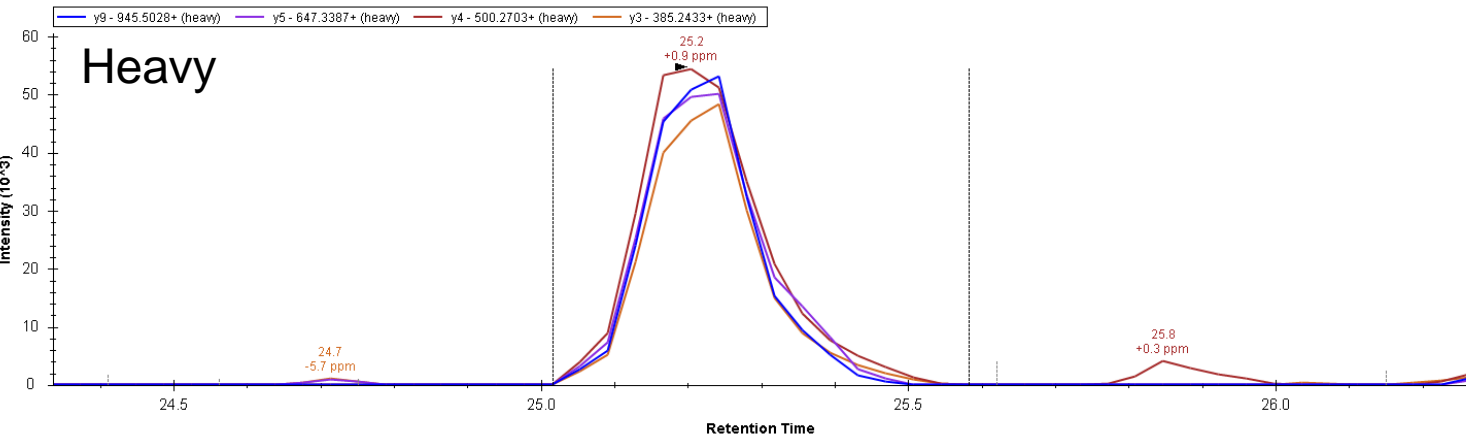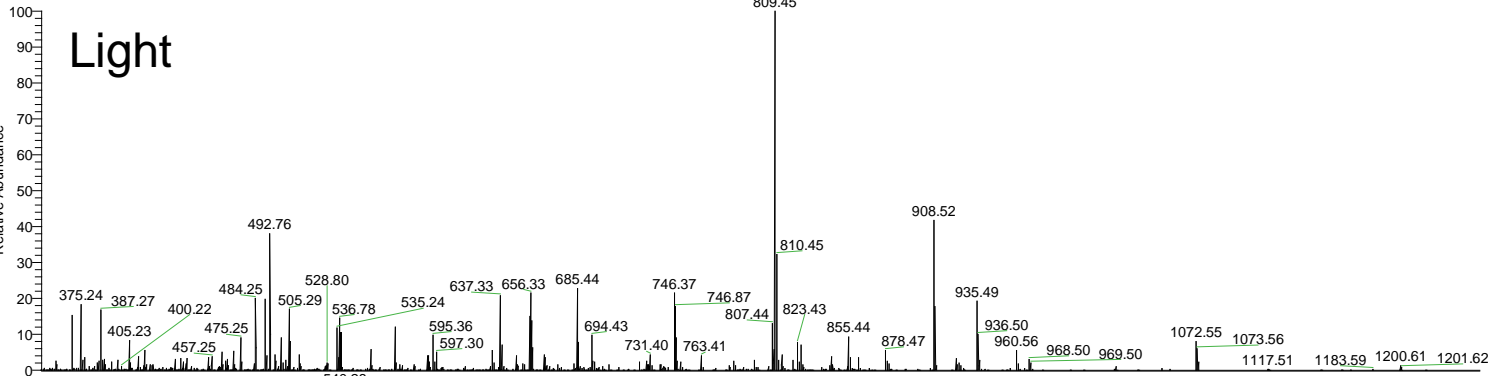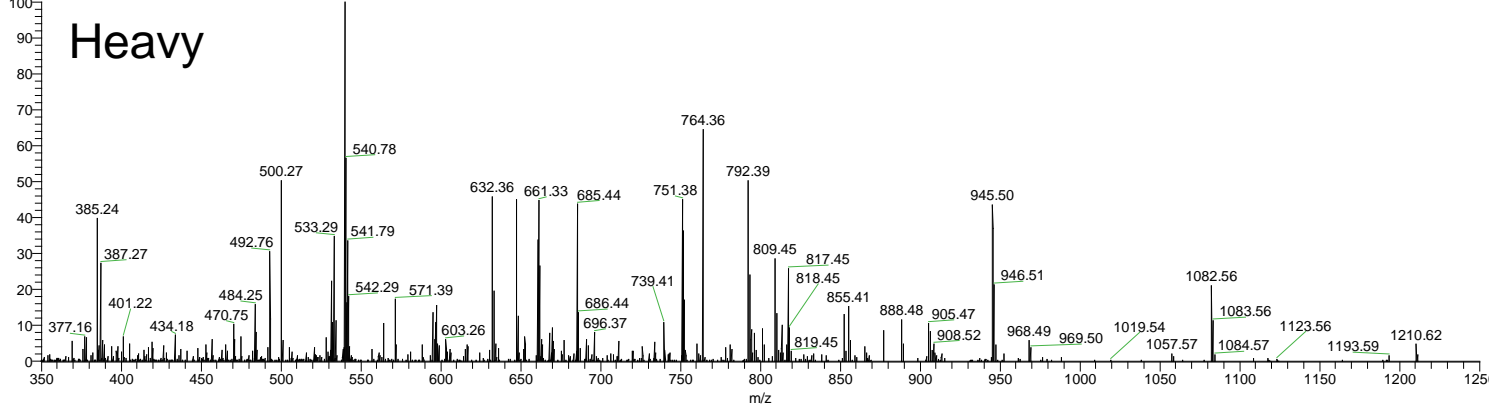

# Ax; Ubiquitin\_12-27; TITLEVEPSDTIENVK

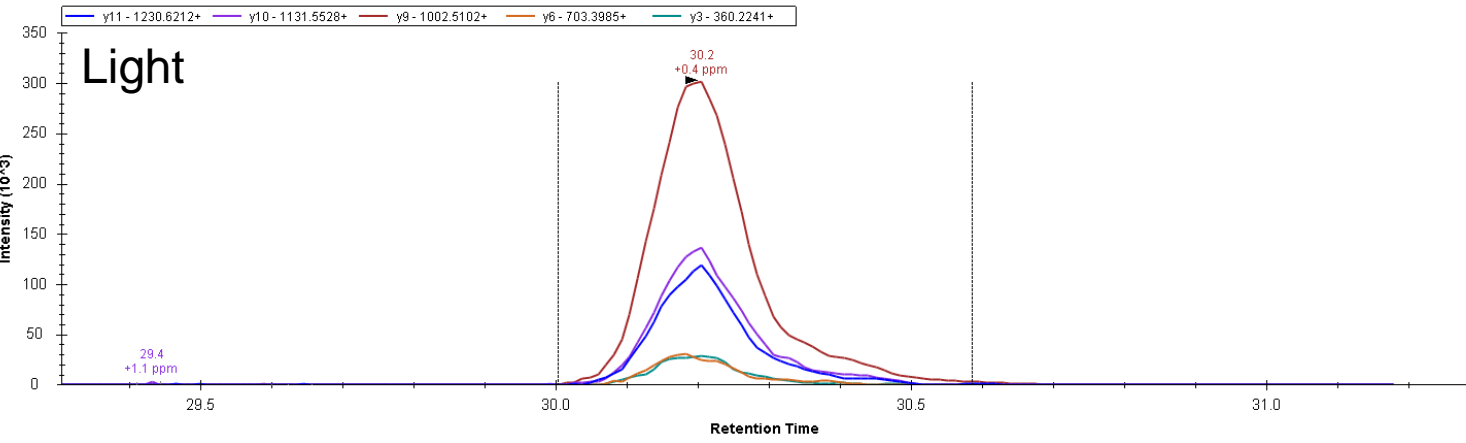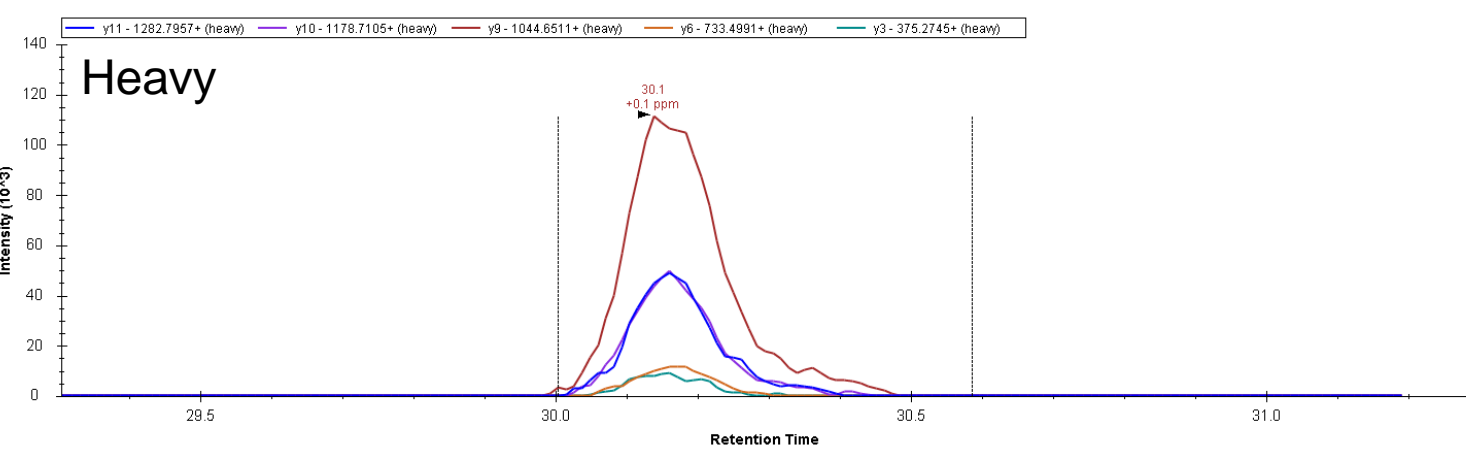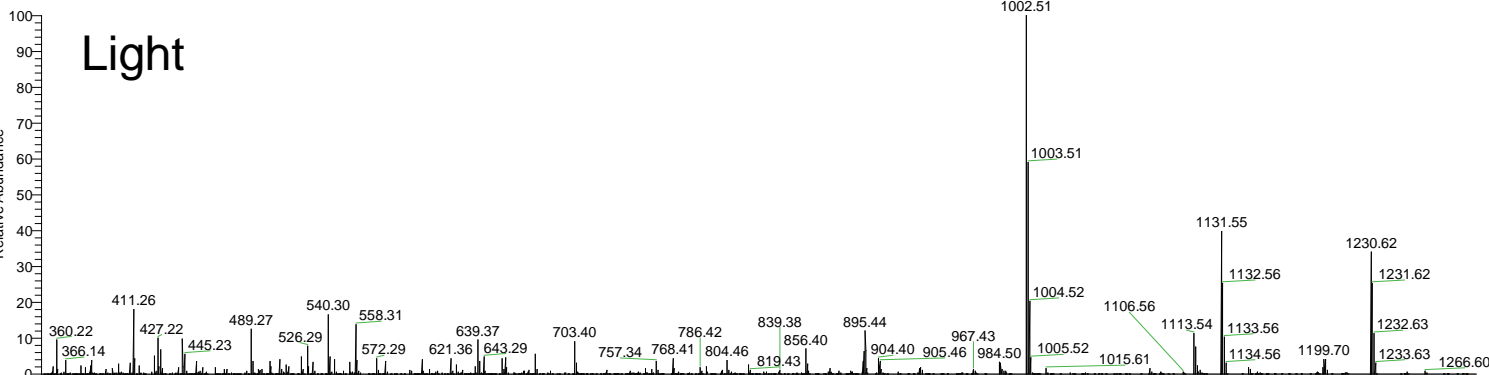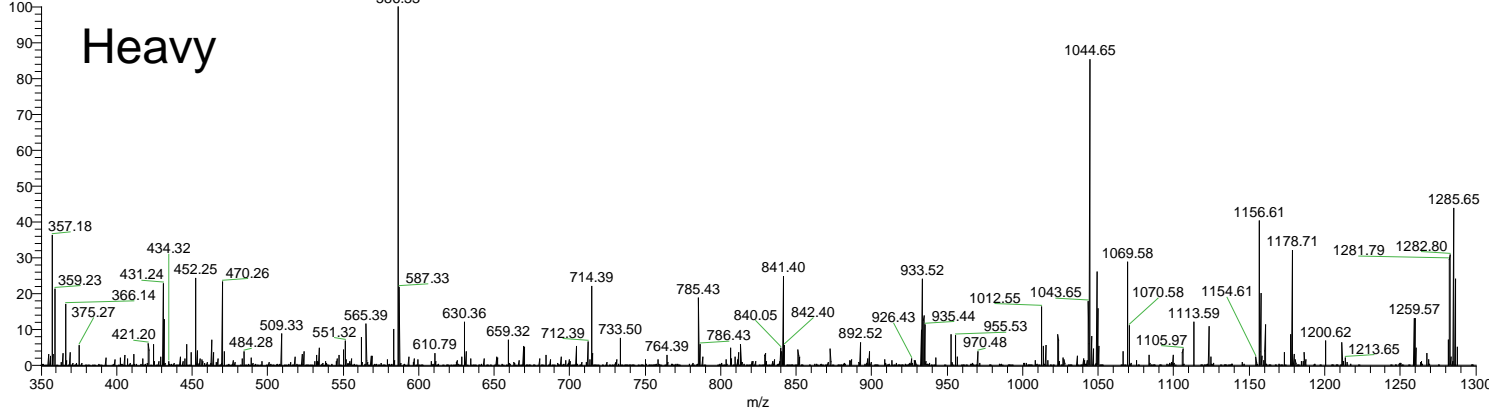

# Ay; Ubiquitin\_64-72; ESTLHLVLR

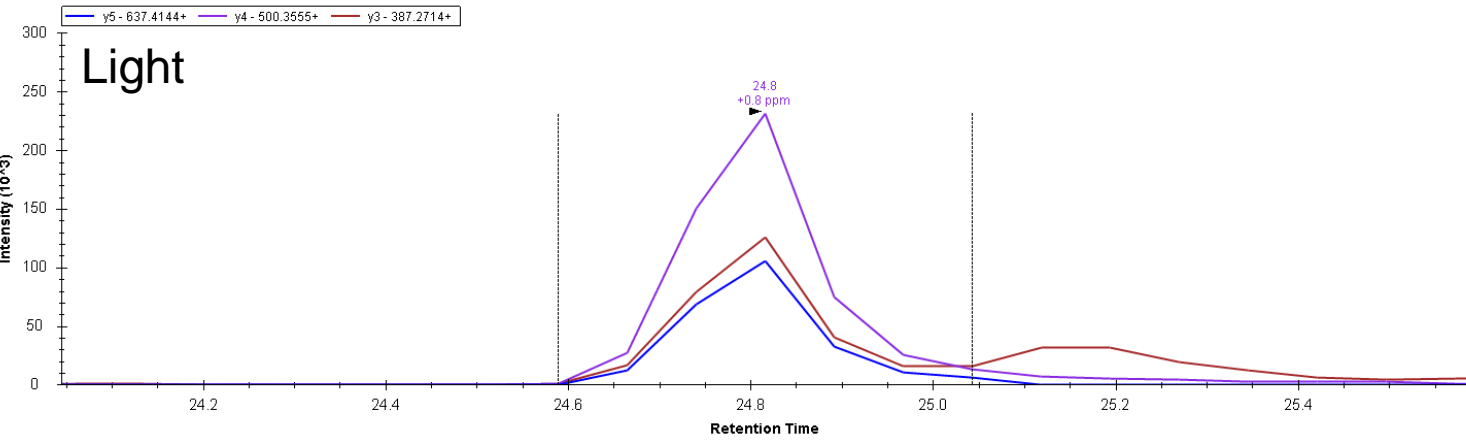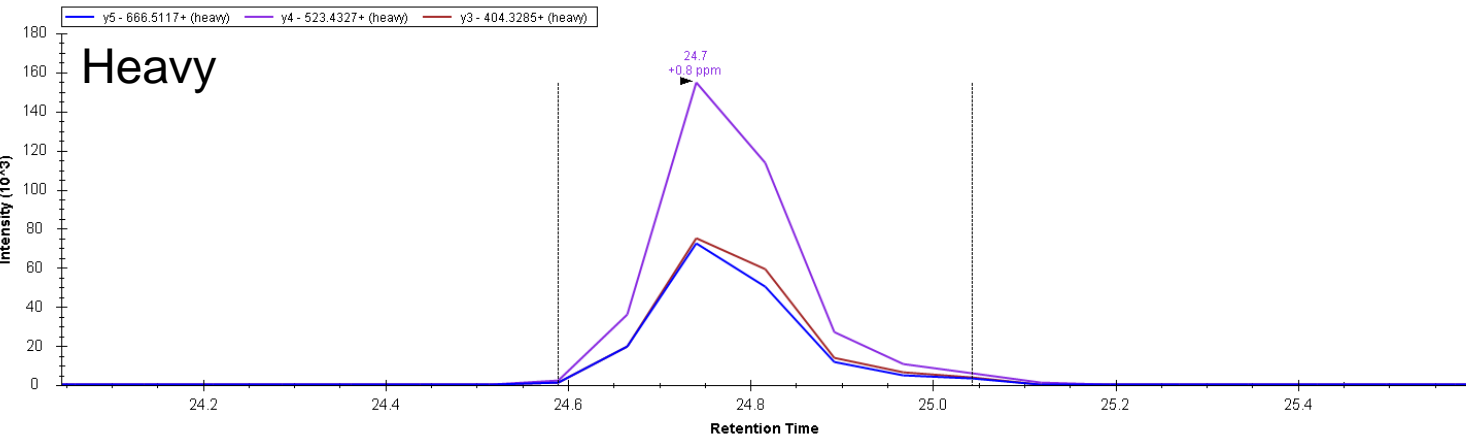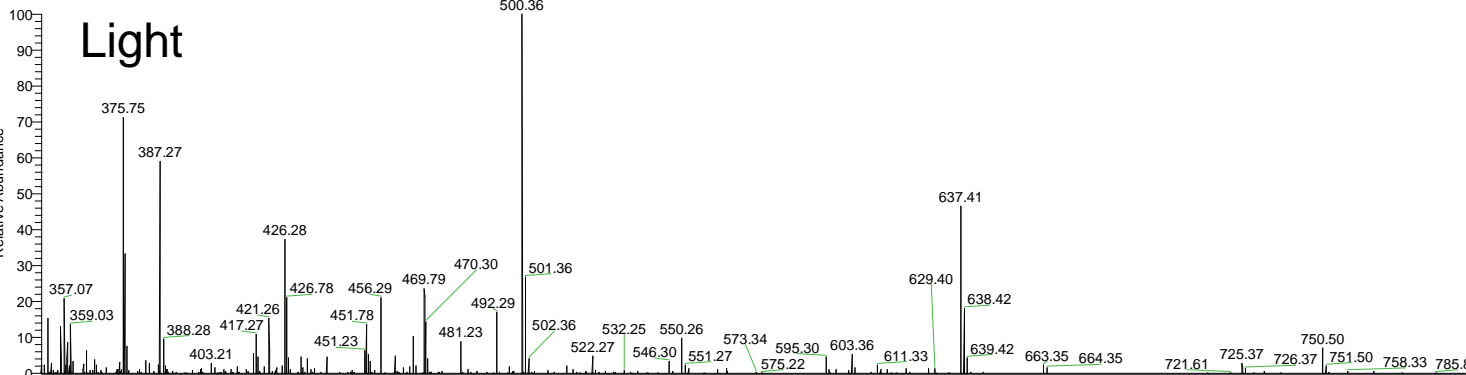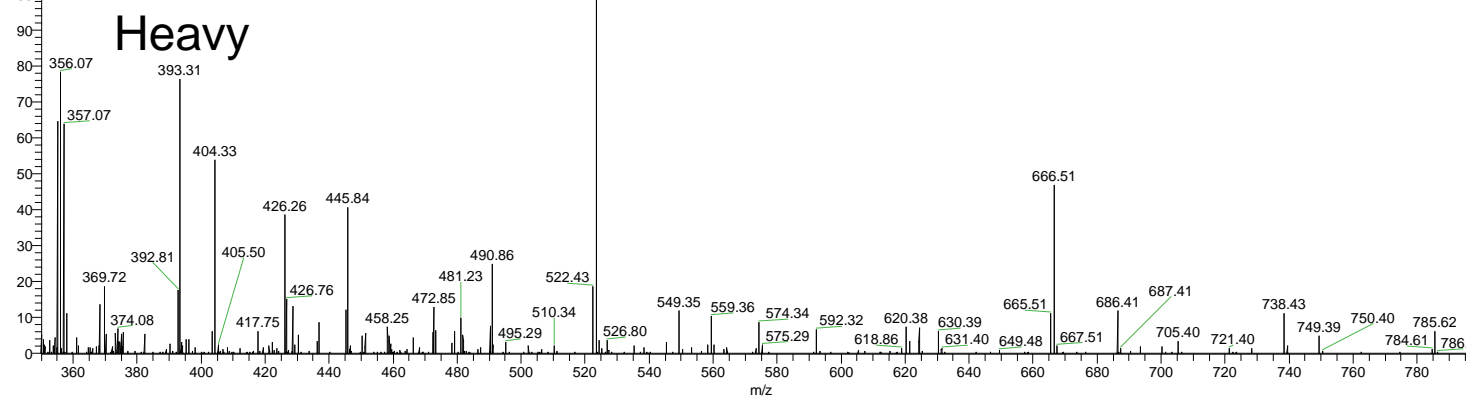

Supplement: MOESM5 [file 17172550]
