# Supplementary material for: Endo-lysosomal proteins and ubiquitin CSF concentrations in Alzheimer’s and Parkinson’s disease
Source: Springer Nature journal article supplement (doi:10.1186/s13195-019-0533-9), 2019-09-14

## **Additional File 8**

Endo-Lysosomal Proteins and Ubiquitin CSF Concentrations in Alzheimer's and Parkinson's Disease

Simon Sjödin<sup>1,2</sup>, Gunnar Brinkmalm<sup>1,2</sup>, Annika Öhrfelt<sup>1,2</sup>, Lucilla Parnetti<sup>3</sup>, Silvia Paciotti<sup>4</sup>, Oskar Hansson<sup>5,6</sup>, John Hardy<sup>7</sup>, Kaj Blennow<sup>1,2</sup>, Henrik Zetterberg<sup>1,2,7,8</sup>, Ann Brinkmalm<sup>1,2</sup>

<sup>1</sup>Department of Psychiatry and Neurochemistry, Institute of Neuroscience and Physiology, the Sahlgrenska Academy at the University of Gothenburg, Mölndal, Sweden

<sup>2</sup>Clinical Neurochemistry Laboratory, Sahlgrenska University Hospital, Mölndal, Sweden

<sup>3</sup>Neurology Clinic, University of Perugia, Perugia, Italy

<sup>4</sup>Department of Pharmaceutical Sciences, University of Perugia, Perugia, Italy

<sup>5</sup>Clinical Memory Research Unit, Department of Clinical Sciences Malmö, Lund University, Lund, Sweden

<sup>6</sup>Memory Clinic, Skåne University Hospital, Malmö, Sweden

<sup>7</sup>Department of Molecular Neuroscience, University College London Institute of Neurology, Queen Square, London, UK

<sup>8</sup>UK Dementia Research Institute at UCL, London, United Kingdom

Corresponding Author: Simon Sjödin, Department of Psychiatry and Neurochemistry, Institute of Neuroscience and Physiology, the Sahlgrenska Academy at the University of Gothenburg, House V3, SU/Mölndal, SE-43180, Mölndal, Sweden. [simon.sjodin@neuro.gu.se](mailto:simon.sjodin@neuro.gu.se).

## **Content**

Figure S3

**Figure S3. Significant peptides in Clinical Studies I and II.** Peptides identified with a significantly different CSF concentration in either Clinical Study I or Clinical Study II, or both, are shown; (A) AP2B1\_712-719, (B) AP2B1\_835-842, (C) AP2B1\_868-878 (the peptide was not measured in Clinical Study II), (D) C9\_232-242, (E) CTSB\_80-87, (F) CTSF\_103-116, (G) CTSF\_236-245, (H) CTSF\_266-278, (I) CTSF\_442-450, (J) GM2A\_89-96, (K) GM2A\_170-179, (L) LAMP1\_357-363, (M) LAMP2\_133-144, (N) LAMP2\_153-161, (O) LAMP2\_281-289, (P) TCN2\_45-59, (Q) TCN2\_300-313, (R) Ubiquitin\_12-27, and (S) Ubiquitin\_64-72. Clinical Study I (filled symbols) included cross-sectional samples from clinically characterized subjects with AD (N = 6) and PD (N = 10) as well as longitudinal samples from subjects with prodromal AD (N = 10) and stable MCI (N = 15). Clinical Study II (open symbols) included cross-sectional samples from clinically characterized subjects with AD (N = 36) and PD (N = 11) as well as cognitively normal healthy controls (N = 44). Statistics were calculated using Kruskal-Wallis test with Dunn's test for multiple comparisons comparing groups within the studies, not between, and the graphs show Tukey boxplots.

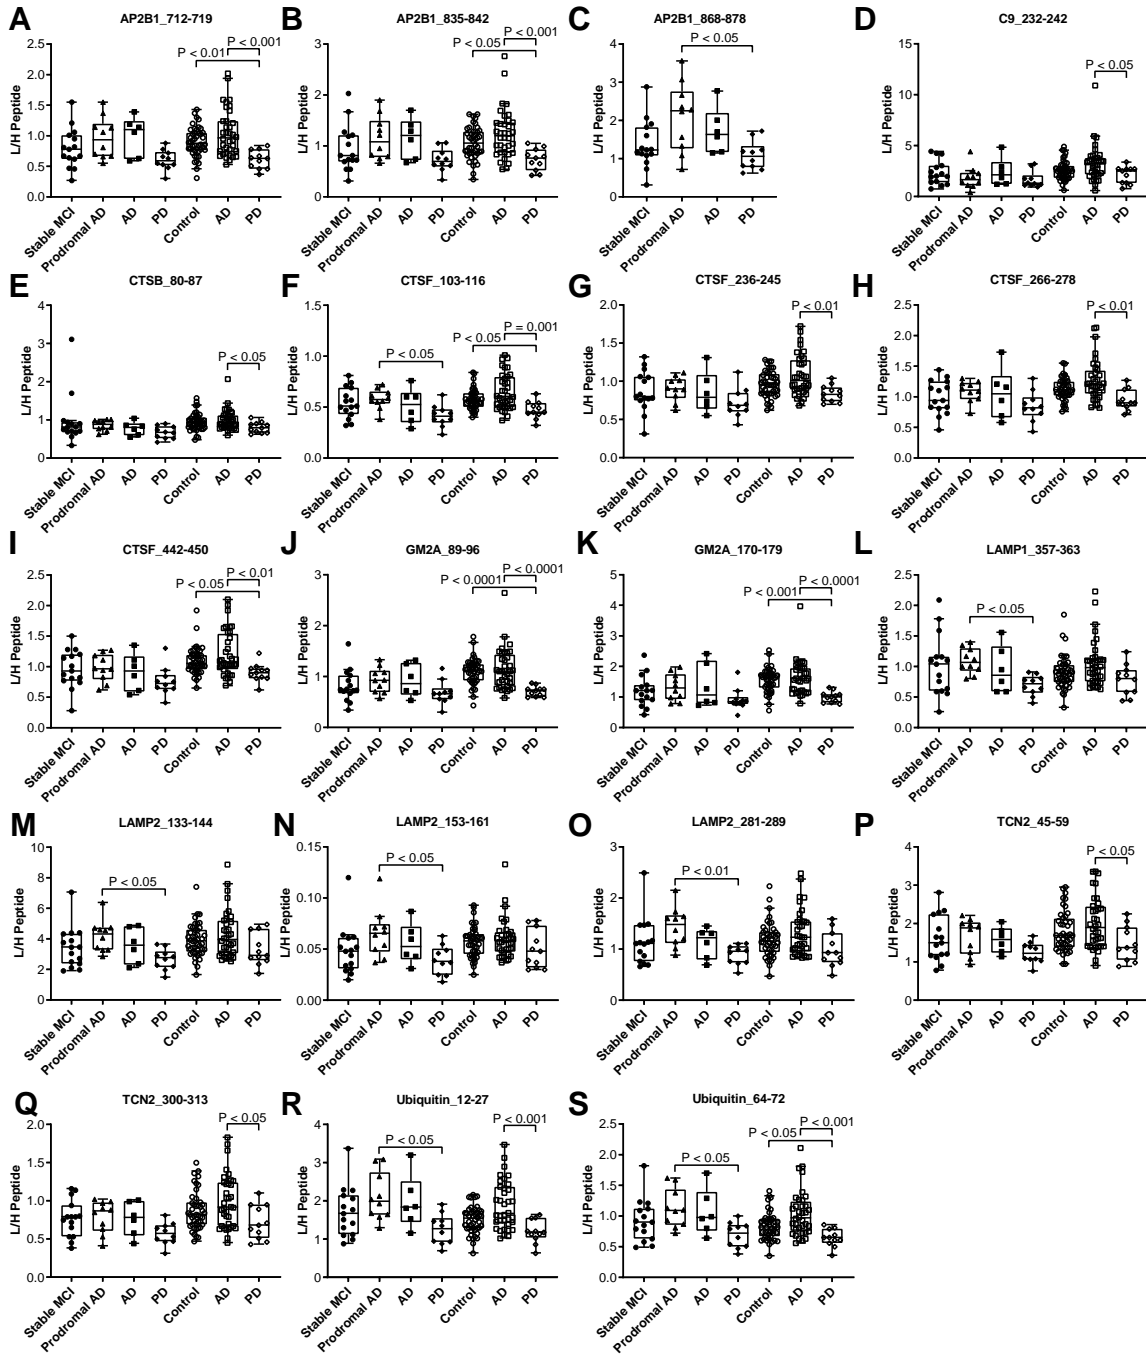

Supplement: MOESM8 [file 17172550]
