# Supplementary material for: Endo-lysosomal proteins and ubiquitin CSF concentrations in Alzheimer’s and Parkinson’s disease
Source: Springer Nature journal article supplement (doi:10.1186/s13195-019-0533-9), 2019-09-14
Supplement: MOESM1 [file 17172550]

## **Additional File 1**

Endo-Lysosomal Proteins and Ubiquitin CSF Concentrations in Alzheimer's and Parkinson's Disease

Simon Sjödin<sup>1,2</sup>, Gunnar Brinkmalm<sup>1,2</sup>, Annika Öhrfelt<sup>1,2</sup>, Lucilla Parnetti<sup>3</sup>, Silvia Paciotti<sup>4</sup>, Oskar Hansson<sup>5,6</sup>, John Hardy<sup>7</sup>, Kaj Blennow<sup>1,2</sup>, Henrik Zetterberg<sup>1,2,7,8</sup>, Ann Brinkmalm<sup>1,2</sup>

<sup>1</sup>Department of Psychiatry and Neurochemistry, Institute of Neuroscience and Physiology, the Sahlgrenska Academy at the University of Gothenburg, Mölndal, Sweden

<sup>2</sup>Clinical Neurochemistry Laboratory, Sahlgrenska University Hospital, Mölndal, Sweden

<sup>3</sup>Neurology Clinic, University of Perugia, Perugia, Italy

<sup>4</sup>Department of Experimental Medicine, University of Perugia, Perugia, Italy

<sup>5</sup>Clinical Memory Research Unit, Department of Clinical Sciences Malmö, Lund University, Lund, Sweden

<sup>6</sup>Memory Clinic, Skåne University Hospital, Malmö, Sweden

<sup>7</sup>Department of Molecular Neuroscience, University College London Institute of Neurology, Queen Square, London, UK

<sup>8</sup>UK Dementia Research Institute at UCL, London, United Kingdom

Corresponding Author: Simon Sjödin, Department of Psychiatry and Neurochemistry, Institute of Neuroscience and Physiology, the Sahlgrenska Academy at the University of Gothenburg, House V3, SU/Mölndal, SE-43180, Mölndal, Sweden.  
simon.sjodin@neuro.gu.se.

## **Content**

Supplementary Methods

## Supplementary Methods

### Protein and Stable Isotope-Labeled Standards

Crude stable isotope-labeled tryptic peptides, labeled with C-terminal heavy Lys or Arg ( $^{13}\text{C}/^{15}\text{N}$  labeled) and modified by Cys carbamidomethylation, were purchased from JPT Peptide Technologies GmbH (SpikeTides L; Berlin, Germany) and Thermo Fisher Scientific Inc. (FasTrack 1; Waltham, MA, USA). The peptides are listed in Supplementary Table 1. Peptides from JPT Peptide Technologies GmbH were dissolved in 10% acetonitrile to a concentration of 13  $\mu\text{M}$ . Peptides from Thermo Fisher Scientific Inc. were dissolved accordingly in  $\text{H}_2\text{O}$ ; BSA\_421-433 (bovine serum albumin; 170  $\mu\text{M}$ ), C9\_146-154 (290  $\mu\text{M}$ ), C9\_186-194 (450  $\mu\text{M}$ ), C9\_232-242 (170  $\mu\text{M}$ ), C9\_473-483 (240  $\mu\text{M}$ ), LAMP2\_133-144 (76  $\mu\text{M}$ ), LAMP2\_153-161 (280  $\mu\text{M}$ ) or in 23% acetonitrile and 0.76% formic acid; C9\_497-508 (240  $\mu\text{M}$ ). All stable isotope-labeled peptides were frozen and stored at  $-20^\circ\text{C}$ . Also bovine serum albumin (BSA; full length, average mass 66430 Da; 100% purity by agarose electrophoresis; Sigma-Aldrich Co. Saint Louis, MO, USA) and  $^{13}\text{C}$  labeled ubiquitin ( $^{13}\text{C}$ -ubiquitin; average mass 8940 Da; >90% protein purity by SDS electrophoresis and >98% isotope enrichment purity; Silantes, GmbH, München, Germany) were dissolved in  $\text{H}_2\text{O}$  to a concentration of 200  $\mu\text{M}$  and 100  $\mu\text{M}$ , respectively. BSA and  $^{13}\text{C}$ -ubiquitin were frozen and stored at  $-20^\circ\text{C}$  and  $-80^\circ\text{C}$ , respectively. An internal standard mixture of stable isotope-labeled peptides, BSA and  $^{13}\text{C}$ -ubiquitin was prepared in 50 mM  $\text{NH}_4\text{HCO}_3$  for the addition to CSF samples. The concentration of peptides and proteins in this mixture is shown in Supplementary Table 1. The standard solution was aliquoted, frozen and stored at  $-80^\circ\text{C}$ . Similarly, a mixture of stable isotope-labeled peptides and  $^{13}\text{C}$ -ubiquitin was prepared in 50 mM  $\text{NH}_4\text{HCO}_3$  for reverse calibration curves by serially diluting the mixture. After dilution BSA was added to all reverse calibration point dilutions to a final concentration of 330 nM BSA. The mixtures of reverse calibration points were frozen and stored at  $-80^\circ\text{C}$ .

## Protein Identification by MS/MS

Sample digestion and SPE was performed as described in the manuscript with a minor modification. Alkylation was performed with the addition of 25  $\mu\text{L}$  of 14 mM iodoacetamide (Sigma-Aldrich Co.) in 50 mM  $\text{NH}_4\text{HCO}_3$  followed by 30 min shaking incubation at room temperature in dark.

Digested samples were dissolved in 100  $\mu\text{L}$  of 50 mM  $\text{NH}_4\text{HCO}_3$ , 0.1% formic acid or 20% acetonitrile by shaking at room temperature for 1 h. Six microliters of dissolved samples were injected and separated using a Dionex UltiMate 3000 nano-LC system (Thermo Fisher Scientific Inc.) with an Acclaim PepMap 100 nanoViper C18 trap column (length, 20 mm; inner diameter, 75  $\mu\text{m}$ ; particle size, 3  $\mu\text{m}$ ; Thermo Fisher Scientific Inc.) and an Acclaim PepMap RSLC nanoViper C18 column (length, 500 mm; inner diameter, 75  $\mu\text{m}$ ; particle size, 2  $\mu\text{m}$ ; Thermo Fisher Scientific Inc.). Mobile phases used were; A: 0.1 % formic acid in water (v/v); and B: 0.1 % formic acid and 84 % acetonitrile in water (v/v). Liquid chromatography was performed in online mode coupled to a tribrid Orbitrap Fusion mass spectrometer (Thermo Fisher Scientific Inc.) operating in positive mode with a nano-spray probe (NSI). The samples were analyzed on two different occasions applying slightly different methodological approaches.

First, triplicate samples dissolved in 0.1% formic acid was separated at a flow rate of 150 nL/min, at +40° C, going from 5% to 40% B over 230 min. The spray voltage was set to 1.7 kV and the capillary temperature to +275° C. A top speed method with 3 sec cycle times using the orbitrap as analyzer was employed. Survey scans were acquired at a resolution setting of 60 k, using a scan range of  $m/z$  350-1400, an AGC target of  $2 \times 10^5$ , a maximum injection time of 50 ms, collecting single microscans and a dynamic exclusion for 50 sec. This was followed by inclusion of the *most* intense precursor ions with an intensity greater than  $5 \times 10^4$  and a charge state range of  $z$  2-8 for tandem mass spectrometry (MS/MS). MS/MS was

achieved by acquisition of single microscans using an isolation window of  $m/z$  3, higher-energy collisional dissociation (HCD) fragmentation with a normalized collision energy (NCE) setting of 29%, a resolution setting of 15 k, a scan range of  $m/z$  350-1000, an AGC target of  $5 \times 10^4$  and a maximum injection time of 60 ms. Second, triplicate samples dissolved in 50 mM  $\text{NH}_4\text{HCO}_3$ , 0.1% formic acid or 20% acetonitrile were separated at a flow rate of 150 nL/min, at  $+60^\circ\text{C}$ , going from 5% to 40% B over 230 min. The spray voltage was set to 1.7 kV and the capillary temperature to  $+250^\circ\text{C}$ . Similarly as described above, a top speed method with 3 sec cycle times and using the orbitrap as analyzer was used. Following survey scans, the *most* intense ions with an intensity greater than  $1 \times 10^4$  and a charge state range of  $z$  2-8 were targeted for MS/MS using the same settings as described above. To enhance data coverage, a second injection of the very same samples were performed with the inclusion for MS/MS of the *least* intense ions with an intensity greater than  $1 \times 10^4$  using the settings already described.

### **Bioinformatic Analysis**

Acquired spectra were searched using an in-house Mascot database server v2.6.1 (Matrix Science Ltd. London, UK), facilitated by Thermo Proteome Discoverer v2.1.1.21 (Thermo Fisher Scientific Inc.). The following search parameters were used: database, SwissProt (2017-11-07, sequences 42153, residues 24298601); taxonomy, *homo sapiens*; enzyme, trypsin; maximum missed cleavages, one; dynamic modification, methionine oxidation; static modification, cysteine carbamidomethylation; instrument type/fragmentation type, 1+, 2+, b- and y-ions; peptide mass tolerance, 10 ppm; and fragment mass tolerance, 20 mmu. Percolator was used for scoring peptide matches using a false discovery rate threshold of 1%. Samples injected twice, using the *most* intense and the *least* intense ions method, respectively, were combined using MudPit scoring.
