# Supplementary material for: Endo-lysosomal proteins and ubiquitin CSF concentrations in Alzheimer’s and Parkinson’s disease
Source: Alzheimers Res Ther. 2019 Sep 14;11:82. doi: 10.1186/s13195-019-0533-9 (PMC6745076; doi:10.1186/s13195-019-0533-9)
Supplement: Supplementary file 6 — Table S3. Demographics and biomarker data. (XLS 259 kb) [file 13195_2019_533_MOESM6_ESM.xls]

## Sheet: Pilot Study
Table S3. Demographic and biomarker data in the Pilot Study.
Filename	Group	Age	Gender	Normalizeda	Exeperimentb	Aβ1-42 (ng/L)	T-tau (ng/L)	P-tau (ng/L)	AP2B1_712-719 (L/H)c	AP2B1_835-842 (L/H)c	AP2B1_868-878 (L/H)c	APP_289-301 (L/H)c	APP_439-450 (L/H)c	BSA_421-433 (L/H)c	C9_146-154 (L/H)c	C9_186-194 (L/H)c	C9_232-242 (L/H)c	C9_473-483 (L/H)c	C9_497-508 (L/H)c	CTSB_58-71 (L/H)c	CTSB_80-87 (L/H)c	CTSB_210-220 (L/H)c	CTSD_55-72 (L/H)c	CTSD_112-122 (L/H)c	CTSD_349-357 (L/H)c	CTSF_103-116 (L/H)c	CTSF_236-245 (L/H)c	CTSF_266-278 (L/H)c	CTSF_442-450 (L/H)c	CTSL_105-116 (L/H)c	CTSZ_39-47 (L/H)c	CTSZ_261-270 (L/H)c	DPP7_40-47 (L/H)c	DPP7_113-123 (L/H)c	DPP7_449-462 (L/H)c	GM2A_89-96 (L/H)c	GM2A_170-179 (L/H)c	HEXB_285-300 (L/H)c	HEXB_391-400 (L/H)c	LAMP1_138-146 (L/H)c	LAMP1_327-337 (L/H)c	LAMP1_357-363 (L/H)c	LAMP2_133-144 (L/H)c	LAMP2_145-152 (L/H)c	LAMP2_153-161 (L/H)c	LAMP2_281-289 (L/H)c	LYZ_52-59 (L/H)c	LYZ_69-80 (L/H)c	FUCA1_114-130 (L/H)c
161209_LB131-2_1_6	AD	67	M	No	1	358	1300	96	1.26855	2.01122	1.98711	1.60339	2.30801	0.828937	1.56979	0.493416	2.28005	2.24574	3.923	0.563939	1.01077	0.664717	0.924629	1.03579	0.761205	0.526229	0.745797	1.14742	0.909822	1.06338	1.28841	0.893731	1.31884	1.68142	0.650421	1.1794	1.49267	2.05795	1.22211	1.35167	1.45988	1.05704	2.59936	1.28827	0.0342142	0.775557	0.776967	0.507974	0.1014
161209_LB131-2_11_21	AD	77	M	No	1	351	1180	105	0.880445	1.19926	1.61507	1.30827	1.64282	0.905782	0.965155	0.306506	1.31951	1.34167	2.4831	0.586276	0.788177	0.684346	1.07049	1.21443	1.02054	0.446589	0.7251	1.03709	0.833369	1.13794	0.866396	1.06252	1.07336	1.51333	0.6673	1.0059	1.40922	1.55252	1.0537	1.42676	1.5382	0.968029	2.54495	1.13169	0.0484437	0.848571	0.593187	0.380909	0.0910215
161209_LB131-2_13_23	AD	81	M	No	1	456	701	81	0.857654	1.27137	1.54734	1.50058	1.97645	0.943847	1.47261	0.459821	2.13449	2.23943	4.23788	0.703653	0.745297	0.708168	1.40825	1.30964	1.13078	0.554011	0.963002	1.26028	0.980956	1.48199	1.21041	1.07891	1.8317	2.65856	1.21508	1.11241	1.32308	1.99219	1.32479	1.92379	1.88581	1.39234	2.32245	1.45472	0.0529289	0.902495	0.886117	0.498294	0.0483673
161209_LB131-2_21_34	AD	68	M	No	1	444	1090	89	0.812797	1.0337	2.11865	0.925845	1.09149	0.794904	0.868731	0.305427	1.47618	1.45795	2.54987	0.417401	0.61035	0.459522	0.843712	0.975234	0.789429	0.401049	0.742977	0.921455	0.782141	0.755353	0.733869	0.739929	0.717283	0.983783	0.464098	0.722466	1.04677	1.68007	0.870727	1.07966	1.05049	0.697552	2.14679	0.871906	0.0405374	0.766171	0.711065	0.407052	0.0984949
161209_LB131-2_3_8	AD	75	M	No	1	511	847	91	1.0756	2.16593	1.57669	1.38317	1.93559	1.0015	2.29209	0.821328	4.1764	3.72382	7.2176	0.498925	0.698969	0.582846	1.29153	1.27198	0.879563	0.62253	0.920087	1.4546	1.13796	1.39904	1.07702	0.950296	1.42164	2.08671	0.888887	1.20432	1.56761	1.86539	1.25249	1.494	1.72249	1.28481	1.63858	1.44259	0.0560828	0.758558	0.803686	0.531768	0.112708
161209_LB131-2_4_9	AD	81	F	No	1	360	1010	96	0.932939	1.53752	1.52197	1.17527	1.53785	0.903146	4.31974	1.33191	6.26044	6.44315	11.0088	0.606803	1.34285	1.05247	0.732271	0.704521	0.563283	0.222201	0.425327	0.606159	0.425104	0.839253	0.711188	0.872699	0.374818	0.476837	0.276766	1.79787	2.31015	1.38781	0.787349	2.34988	2.55085	1.65029	1.66071	1.38891	0.031116	0.676892	5.60002	3.53922	0.112484
161209_LB131-2_7_14	AD	77	F	No	1	443	1080	92	1.00597	1.12461	1.49519	1.38495	1.38686	0.75544	1.36547	0.488749	2.00577	2.12972	3.72595	0.521269	0.731836	0.540545	0.801975	0.893824	0.707508	0.453864	0.746879	1.00852	0.852922	1.03751	0.688007	0.915647	1.01105	1.6425	0.62702	0.987171	1.40657	1.23077	0.808531	1.49435	1.31206	0.936386	2.29948	1.14455	0.0553071	0.758593	0.760559	0.601404	0.0752314
161209_LB131-2_10_18	Control	73	M	No	1	1050	238	37	0.562984	0.803271	0.656789	1.058	1.25097	0.966467	2.68704	0.917996	4.26869	4.42162	8.63143	0.493719	0.506134	0.407646	1.03549	1.06179	0.821047	0.547272	0.884958	1.28363	0.899584	1.08712	0.942851	0.911699	0.932378	1.84018	0.823465	0.993959	0.923145	1.68278	1.03608	1.30722	1.38778	0.81551	1.13983	1.10981	0.0346731	0.535203	0.872309	0.570789	0.0691026
161209_LB131-2_12_22	Control	63	M	No	1	706	296	42	0.493001	0.844747	0.752484	0.74521	1.22072	1.01122	3.98364	1.55222	7.01524	7.18268	14.0758	0.776012	0.76525	0.611687	1.6867	1.42571	0.927064	0.674301	1.11981	1.86365	0.872725	1.14393	1.60006	1.09062	1.50777	2.26648	0.924037	0.834697	0.5009	1.92255	1.03103	1.65181	1.44778	0.930614	0.653993	2.49979	0.030155	0.341505	1.86158	0.882461	0.145647
161209_LB131-2_15_25	Control	62	M	No	1	724	90	16	0.203649	0.25513	0.224611	0.624315	0.690353	0.754097	1.0497	0.390571	1.54284	1.60039	2.97203	0.26045	0.26656	0.285283	0.597566	0.810287	0.706593	0.260996	0.528403	0.710403	0.470178	0.609741	0.54514	0.648506	0.138164	0.144342	0.0803773	0.437703	0.474065	1.10304	0.524742	0.713181	0.605971	0.405439	0.860727	0.451177	0.0154188	0.285634	0.570878	0.40739	0.0488402
161209_LB131-2_16_26	Control	73	M	No	1	977	217	37	0.60003	0.859556	0.865768	1.61698	1.80381	1.0198	1.52453	0.492208	2.1448	2.31706	4.17572	0.495449	0.64602	0.522879	1.16354	1.10846	0.856773	0.462472	0.734723	1.11884	1.0068	1.17791	1.11914	1.03817	1.51385	2.15096	0.888115	0.856957	0.827535	1.8059	1.07913	1.42755	1.64717	0.97748	1.96539	1.19371	0.0461184	0.725908	0.71588	0.404247	0.0778606
161209_LB131-2_19_32	Control	79	F	No	1	836	222	31	0.602377	0.940237	0.856483	1.24364	1.49785	0.949285	0.85565	0.294523	1.25829	1.39472	2.54001	0.403562	0.470287	0.433516	0.921268	0.928022	0.772791	0.525735	0.931843	1.24198	0.985223	0.976496	0.853044	1.04582	1.3005	1.76234	0.776719	0.927442	1.18174	1.65273	1.0218	1.09564	0.856401	0.709472	1.94257	0.903591	0.041779	0.69396	0.638458	0.446871	0.0934218
161209_LB131-2_2_7	Control	60	M	No	1	1070	367	49	0.683337	0.883966	0.550675	1.22786	1.68111	0.89804	2.114	0.605179	2.89998	3.16527	5.54742	0.497609	0.647323	0.494838	0.650088	0.623193	0.462432	0.483638	0.821571	1.18594	0.914231	1.01887	0.77072	0.672743	0.48536	0.794795	0.250625	0.869589	0.973221	1.38742	0.800414	1.15142	1.12534	0.90847	1.29752	1.04672	0.027254	0.562845	0.746617	0.489589	0.0622465
161209_LB131-2_20_33	Control	52	F	No	1	1080	207	39	0.789253	1.16721	1.46061	1.90128	2.45959	0.777347	1.12663	0.366174	1.68876	1.76853	3.24206	0.689466	0.907032	0.887422	1.44756	1.58896	1.34879	0.699142	1.27062	1.69234	1.23296	1.45933	1.10534	1.18668	1.91436	2.27622	1.22843	1.09926	1.58109	2.90025	1.59747	1.55093	1.66167	1.35895	2.84264	1.28078	0.0640141	1.01986	0.630009	0.403682	0.0801957
161209_LB131-2_5_10	Control	71	F	No	1	1000	319	44	0.632897	0.725154	0.944119	0.82054	1.14533	0.824669	1.55015	0.449993	2.2057	2.2623	3.86435	0.342779	0.401135	0.372047	0.967012	0.799956	0.65016	0.401358	0.676881	1.00365	0.835501	0.908937	0.716265	0.742112	0.530925	0.761348	0.342133	0.95655	1.18148	1.37464	0.850105	1.17581	0.98448	0.889969	1.65066	1.04869	0.0538776	0.616367	0.60242	0.420406	0.0642954
161209_LB131-2_6_13	Control	50	F	No	1	993	206	35	0.479818	0.644521	0.755223	1.37215	2.05552	0.832068	1.24833	0.367918	1.67172	1.71673	3.12253	0.704435	0.670166	0.615437	1.07215	1.00459	0.782249	0.387881	0.688444	0.91444	0.755774	1.18709	1.19701	0.964667	1.39271	2.26546	0.799262	0.714619	0.781056	1.60956	1.09643	1.12086	1.12652	0.761529	1.5903	1.03059	0.048264	0.601545	0.609137	0.317523	0.0381218
161209_LB131-2_9_17	Control	74	M	No	1	1040	266	38	0.685561	1.08013	1.264	1.07595	1.17733	0.737442	1.92492	0.589767	3.23584	2.92418	5.18306	0.440108	0.507009	0.464384	1.44633	1.20184	0.922452	0.564144	0.955823	1.34377	1.03018	1.00748	0.920994	0.988876	0.664016	0.940014	0.383034	0.961622	1.27925	1.29585	0.919497	1.10584	0.986606	0.728144	1.95783	1.05111	0.0439647	0.602837	1.05321	0.693815	0.0710787
LB131-5_170818_118_4	AD	68	F	No	2	420	470	80	0.95304	1.19859		1.83398	2.27289	1.05554	1.52017	0.50059	2.29523	2.61488	3.70008	0.367188	0.63384	0.526837	1.04448	1.00963	0.927441	0.461357	0.913141	1.29361	1.02171	1.47253	0.692428	0.725091	1.3773	2.3849	0.697549	1.05306	1.02689	1.66637	1.01402	1.29262	1.05866	0.939628	2.10064	1.20472	0.0637444	0.963689	0.869563	0.483074	0.0976365
LB131-5_170818_175_29	AD	77	M	No	2	380	1180	112	1.92969	2.00635		1.46422	1.89736	1.23719	2.39712	0.781223	3.79546	5.03919	8.56976	0.727568	1.02718	0.670648	1.28571	1.15784	0.905974	0.721566	1.22246	1.73943	1.31539	1.67633	0.981144	1.17712	1.70702	1.938	1.13869	1.25417	1.30442	2.26056	1.33994	1.52974	1.97454	1.36004	2.52607	1.88306	0.0550674	1.35148	0.992134	0.814676	0.105893
LB131-5_170818_180_6	AD	67	M	No	2	340	940	80	1.15183	1.44451		0.936448	0.898659	1.0576	3.27117	1.0172	4.7342	4.68962	8.09083	0.622747	0.85575	0.681323	0.959427	1.06463	0.828778	0.554997	1.14616	1.41877	0.916893	1.06793	0.910512	0.81215	0.708549	1.1121	0.48882	1.21668	1.33125	1.60677	0.635895	1.18704	0.843861	0.655334	1.39883	1.59045	0.0414035	0.72019	1.526	0.655184	0.0963803
LB131-5_170818_182_7	AD	73	M	No	2	350	750	98	1.04995	1.27995		1.77218	2.41772	1.02096	1.28068	0.413466	1.97326	1.9903	3.00567	0.454586	0.886327	0.548775	0.635479	0.728466	0.661254	0.490335	0.891249	1.20795	1.03765	0.883275	0.864835	0.806928	0.790455	0.590744	0.349994	1.07488	1.34865	1.8334	0.952297	1.03557	1.02317	0.774953	2.31857	0.982372	0.0490284	0.985877	0.697066	0.352559	0.0741822
LB131-5_170818_192_24	AD	76	M	No	2	390	610	80	0.724191	0.841075		1.04757	1.07527	1.10221	1.55065	0.468982	2.50623	2.44818	4.69678	0.453614	0.698376	0.52231	0.774683	0.910341	0.859308	0.519581	0.988221	1.21552	1.2042	0.906321	0.864557	0.749188	1.09673	1.34256	0.626671	0.832416	1.16901	1.50239	0.814986	1.11429	0.974561	0.73076	2.14929	0.897249	0.0348664	0.783505	0.894271	0.514068	0.074084
LB131-5_170818_194_30	AD	87	F	No	2	360	1120	104	1.72147	2.13578		2.86701	4.41238	1.29512	2.13955	0.762387	4.54182	5.05425	7.67973	1.02262	0.995925	0.832975	2.12092	1.48029	1.04332	0.8428	1.39274	2.0142	1.56782	2.29534	1.71185	1.53451	2.44647	4.27537	1.95896	1.50037	1.67695	4.17577	2.03181	2.44038	2.13521	2.23018	3.1452	2.40983	0.0908384	2.05676	0.737698	0.65061	0.21784
LB131-5_170818_211_32	AD	74	F	No	2	230	960	106	1.48522	1.8581		1.31084	1.83816	1.37284	1.38879	0.386157	2.8891	3.51353	5.17607	0.712029	0.742272	0.539734	1.7278	1.63515	0.976456	0.6604	0.955489	1.74618	1.41402	1.59451	1.01128	0.929454	1.46883	2.38714	0.850825	1.1506	1.42593	3.36994	1.30194	1.29208	1.58149	1.42519	2.87511	1.57994	0.0457695	1.53055	0.888568	0.857916	0.0919367
LB131-5_170818_225_15	AD	90	F	No	2	490	1070	112	1.4964	1.60952		1.93178	2.37955	1.08541	2.23455	0.7676	3.47268	3.45181	4.53289	0.439221	0.732448	0.607327	0.982069	0.88143	0.87076	0.502638	0.982551	1.10709	1.1598	1.16094	1.05515	0.903966	1.14653	0.995327	0.5462	1.53173	2.04038	1.38677	1.05493	1.47008	0.885681	0.933261	2.7054	1.582	0.0973895	1.32362	1.49376	0.850847	0.0883071
LB131-5_170818_239_23	AD	79	F	No	2	420	770	87	0.897538	1.1613		1.12779	1.63501	1.08914	1.82715	0.667769	3.19493	3.25201	6.10293	0.460902	0.758192	0.510434	0.743068	0.844846	0.769806	0.45139	0.958888	1.19182	0.843474	1.02835	1.09769	0.849314	1.25556	1.93303	0.806322	1.17175	1.09697	1.48043	0.830158	1.24451	1.03723	0.721614	1.34188	1.29697	0.0406722	0.681913	1.56145	1.07016	0.0963266
LB131-5_170818_245_21	AD	83	F	No	2	480	710	83	1.53818	1.80561		2.28723	2.87934	1.13374	2.32284	0.71655	3.58742	3.4517	6.78922	0.917915	2.10962	1.15018	1.27178	1.27833	1.059	0.703039	1.43792	1.65979	1.43845	1.89533	0.566382	1.27989	1.59388	1.74191	0.846025	1.55695	2.23272	2.06456	1.45968	2.19509	2.14077	1.7179	3.58803	2.00505	0.062622	1.43113	1.09772	0.733782	0.109533
LB131-5_170818_248_25	AD	71	F	No	2	500	832	94	1.09765	1.27803		1.14297	1.36554	1.12924	1.01101	0.291479	1.61913	1.57286	2.93444	0.5262	0.798354	0.608542	0.922806	0.960975	0.857736	0.600762	1.15385	1.39074	1.23416	1.15227	0.938853	0.835955	1.06446	1.2337	0.631081	1.2345	1.61547	1.85699	1.01984	1.09807	0.907148	0.852406	2.33679	1.11914	0.0463501	1.03832	0.963284	0.624104	0.0713685
LB131-5_170818_52_28	AD	76	F	No	2	280	610	80	1.19377	1.61834		1.2198	1.77479	1.20426	2.81071	0.886061	4.02707	5.48918	8.78737	0.64486	0.739401	0.69803	1.16497	1.20205	0.915352	0.788505	1.54645	1.71702	1.72576	1.39844	1.0621	0.988553	1.32988	2.09451	0.637431	1.1386	0.954984	1.92877	1.04666	1.34548	1.53835	1.15144	1.38841	1.692	0.0291576	0.930706	1.09079	0.772923	0.0318684
LB131-5_170818_115_20	Control	66	M	No	2	620	150	25	0.410844	0.411653		0.754493	0.729592	1.11743	1.88105	0.587315	2.73735	2.83223	5.35927	0.530855	0.636111	0.489075	1.26576	1.07774	1.05637	0.405211	0.915868	0.954537	0.960157	0.883061	1.17999	1.17839	0.931052	0.928714	0.465671	0.635573	0.836171	1.74035	1.09991	0.776798	0.585801	0.504398	0.988591	0.601331	0.0206561	0.453904	1.30744	0.715388	0.102016
LB131-5_170818_122_11	Control	60	M	No	2	870	330	59	0.8185	1.04495		1.37805	1.6619	1.07204	1.74167	0.527878	2.22217	2.32416	5.11877	0.372686	0.605978	0.441596	0.928347	0.879623	0.817691	0.397126	0.650177	0.823726	0.733224	0.740123	0.613206	0.5815	0.776133	0.856102	0.447731	0.972361	1.43746	1.13351	0.65839	0.965571	0.873156	0.537626	1.91121	0.882433	0.0401914	0.725371	0.863797	0.500899	0.0635964
LB131-5_170818_127_5	Control	63	F	No	2	880	310	49	0.771001	0.902053		0.901999	0.881755	1.02989	1.7142	0.544768	2.35535	2.63965	3.66362	0.467981	0.768552	0.497319	0.252881	0.727244	0.544331	0.409834	0.843181	1.21839	0.855827	0.814151	0.801719	0.716288	0.796567	0.907208	0.416855	1.19674	1.34017	0.961871	0.61111	1.18442	0.83488	0.589242	1.24836	1.2055	0.0340657	0.8063	0.762732	0.427715	0.0582863
LB131-5_170818_130_31	Control	70	F	No	2	800	330	56	1.14994	1.386		1.23562	1.67355	1.32471	2.14149	0.722088	3.46299	5.29174	8.54045	0.668393	0.800672	0.560806	0.678566	1.40675	0.887649	0.83526	1.12606	1.87365	1.33031	1.54481	0.937221	1.00338	1.20777	1.86746	0.837404	1.07397	1.31148	2.29096	1.33689	1.15535	1.6779	1.19042	2.66763	1.55729	0.0461732	1.10369	0.873667	0.571645	0.140031
LB131-5_170818_132_27	Control	85	M	No	2	850	330	59	1.57463	1.58941		0.926472	1.04948	1.18227	2.10736	0.628262	3.70681	3.65741	6.48064	0.442952	0.739943	0.565527	0.549292	1.18208	0.933533	0.650549	1.30534	1.88731	1.35374	1.23268	0.911268	0.884442	1.25998	1.49265	0.823269	1.23545	1.58483	1.6287	1.10257	1.32063	1.33791	1.05634	2.16591	1.51994	0.0437321	1.04517	1.42152	0.873334	0.11794
LB131-5_170818_135_2	Control	78	M	No	2	660	320	45	0.685888	0.835037		0.723228	0.610679	1.04646	2.38529	0.789804	3.70518	3.90669	5.35996	0.536998	0.756617	0.542124	0.826198	0.782209	0.664084	0.598604	1.21654	1.51362	1.03955	1.0422	1.208	1.06682	0.860088	1.508	0.632533	1.10953	1.02896	1.31224	0.817628	1.44866	1.94366	0.8812	1.11731	1.38135	0.0412629	0.681575	1.48107	0.790237	0.0735221
LB131-5_170818_158_9	Control	75	M	No	2	820	240	46	0.633138	0.712256		1.365	1.71437	1.04404	2.15221	0.585657	2.70719	2.8713	4.41949	0.397414	0.522829	0.476252	0.51113	1.04298	1.06339	0.484581	1.03828	1.39597	0.978859	1.37335	1.65692	1.34239	1.94812	2.7893	1.18083	0.80327	0.874437	1.77727	1.06395	1.71379	1.46866	0.938611	1.57832	1.69772	0.0536451	0.932623	1.57704	0.835821	0.0869709
LB131-5_170818_162_13	Control	74	M	No	2	810	310	38	0.88364	0.934901		1.65975	1.97114	1.08223	1.56314	0.43419	2.05986	2.16833	3.52408	0.49818	0.735954	0.563366	0.85534	0.936098	0.827792	0.574665	1.08825	1.20555	1.07405	1.28321	1.54756	1.14791	1.16148	1.3195	0.787597	0.910138	1.11789	1.5475	1.03861	1.42244	1.28521	0.934947	1.63484	0.955037	0.048962	0.721885	0.944377	0.520222	0.0907823
LB131-5_170818_173_16	Control	73	M	No	2	710	300	41	0.771484	0.847017		1.34497	2.20834	1.0894	1.915	0.488852	2.23195	2.42122	3.54682	0.463603	0.665489	0.559581	1.01303	1.00457	0.762351	0.526533	1.11467	1.37667	0.952288	1.41773	1.49576	1.17481	1.26274	2.17996	0.706931	0.863209	0.959632	2.0707	1.39192	1.71093	1.28983	1.03862	1.21131	1.39668	0.049068	0.778607	1.14599	0.74163	0.106006
LB131-5_170818_177_12	Control	74	M	No	2	830	210	30	0.458675	0.525128		1.17475	1.516	1.0794	1.56989	0.496188	2.17957	2.20771	3.05016	0.420693	0.646077	0.542446	0.966549	1.00669	0.872074	0.47907	0.990273	1.1934	1.06844	1.06363	0.947633	0.88478	1.1163	0.849698	0.647142	0.786887	0.962784	1.36718	0.799922	1.23572	0.740384	0.750869	1.37517	1.01875	0.0437406	0.665209	0.784256	0.405069	0.105788
LB131-5_170818_183_14	Control	68	F	No	2	650	280	31	0.528481	0.692985		0.590684	0.742037	1.06568	0.940716	0.28355	1.38033	1.35343	2.05936	0.29188	0.513245	0.376506	1.26826	1.06541	1.0073	0.305662	0.570691	0.661737	0.662225	0.73159	0.567204	0.549681	0.158518	0.166073	0.0912558	0.757831	1.14721	0.787126	0.55875	0.776095	0.682584	0.450094	1.74205	0.707801	0.0392731	0.662863	0.657614	0.366563	0.0594024
LB131-5_170818_184_3	Control	74	M	No	2	1040	340	52	0.9785	1.05879		1.44966	1.64912	1.03643	1.92838	0.701084	3.10284	3.20515	5.8066	0.428473	0.811522	0.468135	0.954121	1.00592	0.874653	0.590369	1.06808	1.47991	1.30249	1.27418	1.06659	0.945529	1.35443	1.65086	0.83403	1.18621	1.61134	1.69118	1.11073	1.78735	1.82396	1.15131	2.6657	1.32548	0.0730834	1.00668	1.57797	0.82271	0.1476
LB131-5_170818_191_33	Control	59	F	No	2	700	280	51	1.59496	1.8232		2.04515	2.95154	1.44949	0.899142	0.25571	2.04195	2.68656	3.68634	0.995809	0.776471	0.844361	1.55445	2.00989	1.01798	1.02972	1.17267	2.56473	1.77981	2.48749	1.37152	1.33804	1.73504	2.20683	0.776309	1.19628	1.54808	3.97406	1.85039	1.57039	1.73028	1.69831	4.82588	1.88685	0.0535424	2.37356	0.50525	0.464551	0.182657
LB131-5_170818_71_8	Control	81	M	No	2	750	320	55	1.09948	1.4108		2.06915	2.88757	1.04168	2.81696	0.892333	4.5647	4.37101	7.68251	0.551399	1.09082	0.73421	1.13813	1.11301	1.06847	0.620535	1.08421	1.58131	1.0982	1.51163	1.33924	0.982654	1.5244	3.03728	1.25865	1.10962	1.04858	2.51312	1.3358	2.06096	1.79716	1.39426	2.04919	1.71016	0.0503858	1.05857	1.3286	0.646997	0.170789
161209_LB131-2_1_6	AD	67	M	Yes	1	358	1300	96	1.26855	2.01122	1.98711	1.60339	2.30801	0.828937	1.56979	0.493416	2.28005	2.24574	3.923	0.563939	1.01077	0.664717	0.924629	1.03579	0.761205	0.526229	0.745797	1.14742	0.909822	1.06338	1.28841	0.893731	1.31884	1.68142	0.650421	1.1794	1.49267	2.05795	1.22211	1.35167	1.45988	1.05704	2.59936	1.28827	0.0342142	0.775557	0.776967	0.507974	0.1014
161209_LB131-2_11_21	AD	77	M	Yes	1	351	1180	105	0.880445	1.19926	1.61507	1.30827	1.64282	0.905782	0.965155	0.306506	1.31951	1.34167	2.4831	0.586276	0.788177	0.684346	1.07049	1.21443	1.02054	0.446589	0.7251	1.03709	0.833369	1.13794	0.866396	1.06252	1.07336	1.51333	0.6673	1.0059	1.40922	1.55252	1.0537	1.42676	1.5382	0.968029	2.54495	1.13169	0.0484437	0.848571	0.593187	0.380909	0.0910215
161209_LB131-2_13_23	AD	81	M	Yes	1	456	701	81	0.857654	1.27137	1.54734	1.50058	1.97645	0.943847	1.47261	0.459821	2.13449	2.23943	4.23788	0.703653	0.745297	0.708168	1.40825	1.30964	1.13078	0.554011	0.963002	1.26028	0.980956	1.48199	1.21041	1.07891	1.8317	2.65856	1.21508	1.11241	1.32308	1.99219	1.32479	1.92379	1.88581	1.39234	2.32245	1.45472	0.0529289	0.902495	0.886117	0.498294	0.0483673
161209_LB131-2_21_34	AD	68	M	Yes	1	444	1090	89	0.812797	1.0337	2.11865	0.925845	1.09149	0.794904	0.868731	0.305427	1.47618	1.45795	2.54987	0.417401	0.61035	0.459522	0.843712	0.975234	0.789429	0.401049	0.742977	0.921455	0.782141	0.755353	0.733869	0.739929	0.717283	0.983783	0.464098	0.722466	1.04677	1.68007	0.870727	1.07966	1.05049	0.697552	2.14679	0.871906	0.0405374	0.766171	0.711065	0.407052	0.0984949
161209_LB131-2_3_8	AD	75	M	Yes	1	511	847	91	1.0756	2.16593	1.57669	1.38317	1.93559	1.0015	2.29209	0.821328	4.1764	3.72382	7.2176	0.498925	0.698969	0.582846	1.29153	1.27198	0.879563	0.62253	0.920087	1.4546	1.13796	1.39904	1.07702	0.950296	1.42164	2.08671	0.888887	1.20432	1.56761	1.86539	1.25249	1.494	1.72249	1.28481	1.63858	1.44259	0.0560828	0.758558	0.803686	0.531768	0.112708
161209_LB131-2_4_9	AD	81	F	Yes	1	360	1010	96	0.932939	1.53752	1.52197	1.17527	1.53785	0.903146	4.31974	1.33191	6.26044	6.44315	11.0088	0.606803	1.34285	1.05247	0.732271	0.704521	0.563283	0.222201	0.425327	0.606159	0.425104	0.839253	0.711188	0.872699	0.374818	0.476837	0.276766	1.79787	2.31015	1.38781	0.787349	2.34988	2.55085	1.65029	1.66071	1.38891	0.031116	0.676892	5.60002	3.53922	0.112484
161209_LB131-2_7_14	AD	77	F	Yes	1	443	1080	92	1.00597	1.12461	1.49519	1.38495	1.38686	0.75544	1.36547	0.488749	2.00577	2.12972	3.72595	0.521269	0.731836	0.540545	0.801975	0.893824	0.707508	0.453864	0.746879	1.00852	0.852922	1.03751	0.688007	0.915647	1.01105	1.6425	0.62702	0.987171	1.40657	1.23077	0.808531	1.49435	1.31206	0.936386	2.29948	1.14455	0.0553071	0.758593	0.760559	0.601404	0.0752314
161209_LB131-2_10_18	Control	73	M	Yes	1	1050	238	37	0.562984	0.803271	0.656789	1.058	1.25097	0.966467	2.68704	0.917996	4.26869	4.42162	8.63143	0.493719	0.506134	0.407646	1.03549	1.06179	0.821047	0.547272	0.884958	1.28363	0.899584	1.08712	0.942851	0.911699	0.932378	1.84018	0.823465	0.993959	0.923145	1.68278	1.03608	1.30722	1.38778	0.81551	1.13983	1.10981	0.0346731	0.535203	0.872309	0.570789	0.0691026
161209_LB131-2_12_22	Control	63	M	Yes	1	706	296	42	0.493001	0.844747	0.752484	0.74521	1.22072	1.01122	3.98364	1.55222	7.01524	7.18268	14.0758	0.776012	0.76525	0.611687	1.6867	1.42571	0.927064	0.674301	1.11981	1.86365	0.872725	1.14393	1.60006	1.09062	1.50777	2.26648	0.924037	0.834697	0.5009	1.92255	1.03103	1.65181	1.44778	0.930614	0.653993	2.49979	0.030155	0.341505	1.86158	0.882461	0.145647
161209_LB131-2_15_25	Control	62	M	Yes	1	724	90	16	0.203649	0.25513	0.224611	0.624315	0.690353	0.754097	1.0497	0.390571	1.54284	1.60039	2.97203	0.26045	0.26656	0.285283	0.597566	0.810287	0.706593	0.260996	0.528403	0.710403	0.470178	0.609741	0.54514	0.648506	0.138164	0.144342	0.0803773	0.437703	0.474065	1.10304	0.524742	0.713181	0.605971	0.405439	0.860727	0.451177	0.0154188	0.285634	0.570878	0.40739	0.0488402
161209_LB131-2_16_26	Control	73	M	Yes	1	977	217	37	0.60003	0.859556	0.865768	1.61698	1.80381	1.0198	1.52453	0.492208	2.1448	2.31706	4.17572	0.495449	0.64602	0.522879	1.16354	1.10846	0.856773	0.462472	0.734723	1.11884	1.0068	1.17791	1.11914	1.03817	1.51385	2.15096	0.888115	0.856957	0.827535	1.8059	1.07913	1.42755	1.64717	0.97748	1.96539	1.19371	0.0461184	0.725908	0.71588	0.404247	0.0778606
161209_LB131-2_19_32	Control	79	F	Yes	1	836	222	31	0.602377	0.940237	0.856483	1.24364	1.49785	0.949285	0.85565	0.294523	1.25829	1.39472	2.54001	0.403562	0.470287	0.433516	0.921268	0.928022	0.772791	0.525735	0.931843	1.24198	0.985223	0.976496	0.853044	1.04582	1.3005	1.76234	0.776719	0.927442	1.18174	1.65273	1.0218	1.09564	0.856401	0.709472	1.94257	0.903591	0.041779	0.69396	0.638458	0.446871	0.0934218
161209_LB131-2_2_7	Control	60	M	Yes	1	1070	367	49	0.683337	0.883966	0.550675	1.22786	1.68111	0.89804	2.114	0.605179	2.89998	3.16527	5.54742	0.497609	0.647323	0.494838	0.650088	0.623193	0.462432	0.483638	0.821571	1.18594	0.914231	1.01887	0.77072	0.672743	0.48536	0.794795	0.250625	0.869589	0.973221	1.38742	0.800414	1.15142	1.12534	0.90847	1.29752	1.04672	0.027254	0.562845	0.746617	0.489589	0.0622465
161209_LB131-2_20_33	Control	52	F	Yes	1	1080	207	39	0.789253	1.16721	1.46061	1.90128	2.45959	0.777347	1.12663	0.366174	1.68876	1.76853	3.24206	0.689466	0.907032	0.887422	1.44756	1.58896	1.34879	0.699142	1.27062	1.69234	1.23296	1.45933	1.10534	1.18668	1.91436	2.27622	1.22843	1.09926	1.58109	2.90025	1.59747	1.55093	1.66167	1.35895	2.84264	1.28078	0.0640141	1.01986	0.630009	0.403682	0.0801957
161209_LB131-2_5_10	Control	71	F	Yes	1	1000	319	44	0.632897	0.725154	0.944119	0.82054	1.14533	0.824669	1.55015	0.449993	2.2057	2.2623	3.86435	0.342779	0.401135	0.372047	0.967012	0.799956	0.65016	0.401358	0.676881	1.00365	0.835501	0.908937	0.716265	0.742112	0.530925	0.761348	0.342133	0.95655	1.18148	1.37464	0.850105	1.17581	0.98448	0.889969	1.65066	1.04869	0.0538776	0.616367	0.60242	0.420406	0.0642954
161209_LB131-2_6_13	Control	50	F	Yes	1	993	206	35	0.479818	0.644521	0.755223	1.37215	2.05552	0.832068	1.24833	0.367918	1.67172	1.71673	3.12253	0.704435	0.670166	0.615437	1.07215	1.00459	0.782249	0.387881	0.688444	0.91444	0.755774	1.18709	1.19701	0.964667	1.39271	2.26546	0.799262	0.714619	0.781056	1.60956	1.09643	1.12086	1.12652	0.761529	1.5903	1.03059	0.048264	0.601545	0.609137	0.317523	0.0381218
161209_LB131-2_9_17	Control	74	M	Yes	1	1040	266	38	0.685561	1.08013	1.264	1.07595	1.17733	0.737442	1.92492	0.589767	3.23584	2.92418	5.18306	0.440108	0.507009	0.464384	1.44633	1.20184	0.922452	0.564144	0.955823	1.34377	1.03018	1.00748	0.920994	0.988876	0.664016	0.940014	0.383034	0.961622	1.27925	1.29585	0.919497	1.10584	0.986606	0.728144	1.95783	1.05111	0.0439647	0.602837	1.05321	0.693815	0.0710787
LB131-5_170818_118_4	AD	68	F	Yes	2	420	470	80	1.03958	1.44631		2.08085	2.57983	0.998018	1.5844	0.491991	2.1286	2.62485	3.98202	0.27386	0.584475	0.474317	1.13066	1.20457	0.900649	0.529739	0.850836	1.32407	0.970268	1.44186	0.700079	0.813748	1.43632	2.2464	0.748188	1.14923	0.915055	1.62089	1.09442	1.38437	1.34558	1.32038	2.23855	1.32445	0.0544623	0.790909	1.04143	0.550439	0.118237
LB131-5_170818_175_29	AD	77	M	Yes	2	380	1180	112	2.10492	2.42101		1.66132	2.15358	1.16976	2.49841	0.767803	3.51992	5.05839	9.22277	0.542642	0.947179	0.603792	1.39179	1.38139	0.879801	0.828516	1.13905	1.78039	1.24916	1.64141	0.991986	1.32105	1.78018	1.82545	1.22135	1.3687	1.16237	2.19887	1.44619	1.63833	2.50969	1.91115	2.69192	2.07022	0.0470487	1.10918	1.18823	0.928284	0.128235
LB131-5_170818_180_6	AD	67	M	Yes	2	340	940	80	1.25642	1.74306		1.0625	1.02002	0.999958	3.40939	0.99973	4.39051	4.7075	8.70735	0.464463	0.789103	0.613403	1.03859	1.27019	0.804836	0.637258	1.06795	1.45219	0.870726	1.04568	0.920572	0.911451	0.738916	1.04752	0.524306	1.32778	1.18627	1.56292	0.686315	1.2713	1.07257	0.920886	1.49067	1.74853	0.0353745	0.591067	1.82761	0.746551	0.116716
LB131-5_170818_182_7	AD	73	M	Yes	2	350	750	98	1.1453	1.54448		2.01074	2.74422	0.965319	1.3348	0.406364	1.83	1.99789	3.2347	0.339044	0.817298	0.494069	0.687912	0.869118	0.642151	0.563012	0.830439	1.2364	0.985402	0.864878	0.874391	0.90559	0.824332	0.556437	0.375402	1.17304	1.20178	1.78336	1.0278	1.10908	1.30048	1.08898	2.47079	1.08001	0.0418891	0.809118	0.834838	0.401723	0.0898338
LB131-5_170818_192_24	AD	76	M	Yes	2	390	610	80	0.789953	1.01491		1.18859	1.22047	1.04214	1.61617	0.460926	2.32428	2.45751	5.05467	0.338319	0.643985	0.470242	0.838601	1.08611	0.834484	0.596593	0.920794	1.24414	1.14357	0.887444	0.87411	0.84079	1.14373	1.26459	0.672164	0.908432	1.0417	1.46139	0.879606	1.19339	1.23869	1.02688	2.29039	0.986427	0.0297893	0.64303	1.07102	0.585755	0.0897149
LB131-5_170818_194_30	AD	87	F	Yes	2	360	1120	104	1.87779	2.5772		3.25294	5.00823	1.22454	2.22995	0.749291	4.2121	5.07351	8.26491	0.762698	0.91836	0.749937	2.29591	1.7661	1.01318	0.967719	1.29771	2.06163	1.48888	2.24754	1.73077	1.72214	2.55132	4.02708	2.10117	1.63738	1.49432	4.06181	2.19291	2.61361	2.7139	3.13388	3.35169	2.64934	0.077611	1.688	0.883501	0.741339	0.263802
LB131-5_170818_211_32	AD	74	F	Yes	2	230	960	106	1.62009	2.24213		1.48729	2.08639	1.29802	1.44748	0.379524	2.67936	3.52693	5.57048	0.531052	0.684462	0.485929	1.87036	1.95086	0.948247	0.758285	0.890295	1.78731	1.34282	1.5613	1.02245	1.0431	1.53178	2.24851	0.912591	1.25567	1.27064	3.27797	1.40517	1.3838	2.01012	2.0027	3.06387	1.73697	0.0391048	1.25614	1.06419	0.977554	0.111334
LB131-5_170818_225_15	AD	90	F	Yes	2	490	1070	112	1.63228	1.94217		2.19182	2.70089	1.02626	2.32897	0.754414	3.22057	3.46497	4.8783	0.327584	0.675403	0.546784	1.0631	1.05162	0.845604	0.577139	0.915511	1.13317	1.1014	1.13676	1.06681	1.01449	1.19567	0.937524	0.585852	1.6716	1.81818	1.34893	1.13858	1.57443	1.12572	1.31143	2.88302	1.73924	0.0832082	1.0863	1.78899	0.969499	0.106939
LB131-5_170818_239_23	AD	79	F	Yes	2	420	770	87	0.979041	1.40132		1.2796	1.8558	1.02978	1.90435	0.656299	2.96299	3.2644	6.56796	0.343754	0.699142	0.45955	0.804377	1.00797	0.747567	0.518294	0.893462	1.21989	0.801004	1.00693	1.10982	0.95316	1.30937	1.82077	0.864857	1.27875	0.977509	1.44003	0.895982	1.33286	1.31835	1.01402	1.42997	1.42588	0.0347497	0.559653	1.87006	1.2194	0.11665
LB131-5_170818_245_21	AD	83	F	Yes	2	480	710	83	1.67785	2.17879		2.59512	3.26817	1.07196	2.42099	0.704241	3.32698	3.46485	7.30655	0.684608	1.94532	1.03552	1.37671	1.52515	1.02841	0.807243	1.33981	1.69888	1.36602	1.85586	0.57264	1.43638	1.66219	1.64075	0.907442	1.69913	1.98956	2.00822	1.57542	2.35091	2.72098	2.41402	3.82359	2.20433	0.0535033	1.17454	1.31468	0.83611	0.132643
LB131-5_170818_248_25	AD	71	F	Yes	2	500	832	94	1.19733	1.54217		1.29683	1.54995	1.0677	1.05373	0.286472	1.50158	1.57885	3.15804	0.392455	0.736176	0.547877	0.998945	1.14652	0.832957	0.689807	1.07512	1.42349	1.17202	1.12827	0.949227	0.938166	1.11008	1.16205	0.676895	1.34723	1.43954	1.80631	1.10071	1.17602	1.15301	1.19782	2.49021	1.23037	0.0396008	0.852161	1.15367	0.711136	0.0864264
LB131-5_170818_52_28	AD	76	F	Yes	2	280	610	80	1.30217	1.95281		1.384	2.01446	1.13863	2.92947	0.870841	3.73471	5.5101	9.45696	0.480956	0.681815	0.628444	1.26109	1.43414	0.888908	0.905377	1.44093	1.75746	1.63887	1.36932	1.07384	1.10942	1.38688	1.97287	0.683706	1.24258	0.850983	1.87613	1.12965	1.44098	1.95529	1.61803	1.47956	1.86017	0.0249118	0.763839	1.30639	0.880708	0.0385923
LB131-5_170818_115_20	Control	66	M	Yes	2	620	150	25	0.448151	0.496733		0.856055	0.828117	1.05653	1.96054	0.577226	2.53862	2.84303	5.76764	0.395927	0.586569	0.44032	1.3702	1.28583	1.02585	0.465271	0.853377	0.977018	0.911812	0.864668	1.19303	1.32247	0.970955	0.87478	0.499476	0.693613	0.745109	1.69286	1.18712	0.831938	0.744567	0.708788	1.0535	0.661098	0.0176483	0.372523	1.56585	0.81515	0.123541
LB131-5_170818_122_11	Control	60	M	Yes	2	870	330	59	0.892826	1.26091		1.56355	1.88633	1.01362	1.81526	0.518811	2.06084	2.33302	5.50881	0.277961	0.558783	0.397574	1.00494	1.04946	0.794069	0.455988	0.605815	0.843126	0.696305	0.724707	0.619982	0.6526	0.809396	0.806384	0.480234	1.06116	1.28092	1.10257	0.710594	1.03411	1.1098	0.755481	2.03668	0.970139	0.0343389	0.595318	1.03452	0.57075	0.0770146
LB131-5_170818_127_5	Control	63	F	Yes	2	880	310	49	0.841013	1.08849		1.02342	1.00083	0.973765	1.78664	0.53541	2.18435	2.64971	3.94279	0.349034	0.708695	0.447742	0.273746	0.867661	0.528606	0.47058	0.78565	1.24709	0.812735	0.797194	0.810577	0.803868	0.830706	0.854523	0.447117	1.30603	1.19422	0.935621	0.659566	1.26849	1.06115	0.828012	1.33032	1.32531	0.0291053	0.661738	0.913482	0.487361	0.070584
LB131-5_170818_130_31	Control	70	F	Yes	2	800	330	56	1.25436	1.67245		1.40194	1.89955	1.25251	2.23198	0.709684	3.21158	5.31191	9.19122	0.498507	0.738313	0.5049	0.734554	1.67836	0.862006	0.959062	1.04923	1.91778	1.26333	1.51263	0.947577	1.12606	1.25953	1.75901	0.898196	1.17204	1.16865	2.22844	1.44289	1.23736	2.13266	1.6728	2.84277	1.71207	0.0394497	0.905806	1.04634	0.651361	0.169576
LB131-5_170818_132_27	Control	85	M	Yes	2	850	330	59	1.71762	1.91791		1.05118	1.1912	1.11784	2.1964	0.61747	3.43771	3.67135	6.97446	0.330367	0.682314	0.509151	0.594613	1.41032	0.906564	0.746973	1.21628	1.93176	1.28557	1.207	0.921337	0.992583	1.31398	1.40596	0.883035	1.34827	1.41223	1.58425	1.19	1.41438	1.70052	1.48438	2.30811	1.67101	0.0373641	0.857778	1.70247	0.995122	0.142824
LB131-5_170818_135_2	Control	78	M	Yes	2	660	320	45	0.748172	1.00762		0.820581	0.693146	0.989429	2.48608	0.776238	3.43619	3.92158	5.76839	0.400509	0.69769	0.488081	0.894366	0.933238	0.644899	0.687329	1.13353	1.54926	0.987203	1.02049	1.22135	1.19726	0.89695	1.42043	0.678452	1.21086	0.916903	1.27643	0.882458	1.55149	2.47044	1.23828	1.19066	1.51864	0.0352544	0.559375	1.7738	0.900437	0.0890345
LB131-5_170818_158_9	Control	75	M	Yes	2	820	240	46	0.690632	0.859464		1.54874	1.94588	0.987143	2.24315	0.575597	2.51066	2.88225	4.75625	0.296403	0.48211	0.428776	0.553302	1.24436	1.03267	0.556406	0.967438	1.42885	0.929572	1.34474	1.67523	1.50652	2.03161	2.62732	1.26655	0.876624	0.779208	1.72877	1.14831	1.83544	1.8667	1.31895	1.68194	1.86645	0.0458335	0.765413	1.88874	0.952377	0.105321
LB131-5_170818_162_13	Control	74	M	Yes	2	810	310	38	0.963881	1.12812		1.88317	2.23733	1.02325	1.62919	0.426732	1.91032	2.1766	3.79262	0.371557	0.678636	0.507206	0.925913	1.11684	0.803878	0.659841	1.014	1.23394	1.01997	1.25648	1.56466	1.28827	1.21126	1.24287	0.844772	0.993252	0.99615	1.50526	1.12097	1.52342	1.63353	1.3138	1.74217	1.04996	0.0418324	0.592458	1.13103	0.592768	0.109936
LB131-5_170818_173_16	Control	73	M	Yes	2	710	300	41	0.84154	1.02208		1.52602	2.50656	1.03003	1.99592	0.480455	2.06991	2.43045	3.81708	0.345769	0.61366	0.503797	1.09661	1.19853	0.740328	0.604575	1.03861	1.40909	0.904339	1.3882	1.51229	1.31845	1.31686	2.05336	0.758251	0.942037	0.855124	2.01419	1.50229	1.83238	1.6394	1.45949	1.29083	1.5355	0.041923	0.63901	1.37249	0.845052	0.128373
LB131-5_170818_177_12	Control	74	M	Yes	2	830	210	30	0.500326	0.633661		1.33288	1.72072	1.02057	1.63622	0.487665	2.02134	2.21612	3.28258	0.313766	0.595759	0.48837	1.0463	1.20106	0.846881	0.550077	0.922706	1.22151	1.01465	1.04148	0.958104	0.992962	1.16414	0.800353	0.694121	0.858746	0.857933	1.32987	0.863349	1.32343	0.941047	1.05513	1.46545	1.12	0.0373713	0.545943	0.939261	0.461557	0.128108
LB131-5_170818_183_14	Control	68	F	Yes	2	650	280	31	0.57647	0.836211		0.670196	0.842242	1.0076	0.980465	0.278679	1.28012	1.35859	2.21628	0.217693	0.473273	0.338972	1.3729	1.27112	0.978204	0.350967	0.531752	0.677322	0.628881	0.716353	0.573472	0.61689	0.165312	0.156428	0.0978805	0.827036	1.02228	0.765645	0.603054	0.831186	0.867582	0.63248	1.85642	0.77815	0.0335543	0.544018	0.787588	0.41768	0.0719356
LB131-5_170818_184_3	Control	74	M	Yes	2	1040	340	52	1.06736	1.27762		1.6448	1.87182	0.979941	2.00986	0.689041	2.87758	3.21736	6.24906	0.319568	0.748319	0.421467	1.03284	1.20015	0.849386	0.677873	0.995207	1.51476	1.23691	1.24765	1.07838	1.06114	1.41248	1.55499	0.894576	1.29453	1.43586	1.64503	1.1988	1.91422	2.3183	1.61784	2.84071	1.45722	0.0624414	0.82619	1.88985	0.937439	0.178742
LB131-5_170818_191_33	Control	59	F	Yes	2	700	280	51	1.7398	2.20002		2.32045	3.35011	1.37049	0.937134	0.251317	1.89371	2.6968	3.96724	0.742704	0.715998	0.760188	1.6827	2.39796	0.988567	1.18235	1.09265	2.62513	1.6902	2.43568	1.38667	1.50164	1.8094	2.07867	0.832665	1.30553	1.37949	3.8656	1.99711	1.68186	2.19923	2.3865	5.14272	2.07439	0.0457458	1.948	0.60511	0.529334	0.221196
LB131-5_170818_71_8	Control	81	M	Yes	2	750	320	55	1.19932	1.70239		2.34768	3.27751	0.984907	2.93599	0.877005	4.23331	4.38767	8.26791	0.41125	1.00587	0.661018	1.23203	1.32792	1.0376	0.71251	1.01023	1.61855	1.04291	1.48015	1.35404	1.1028	1.58973	2.86089	1.35003	1.21095	0.93439	2.44454	1.44171	2.20725	2.28424	1.95923	2.18372	1.88013	0.0430488	0.868779	1.5912	0.737222	0.206823
aNormalized and non-nomarlized values. The samples were analyzed on two different occassions. The peptide ratios were normalized agaisnt eight replicte QC samples analyzed on each ocassion.
bThe sample were analyzed on two different occassions, occassion 1 and 2, respectively.
cPeptide measurements show the area ratio of tryptic to stable isotope-labeled peptide (L/H).
[truncated: 10 more columns]

## Sheet: Clinical Study I
Table S3. Demographic and biomarker data in Clinical Study I.
Filename	Group	Age	Gender	Follow-Up (years)	Aβ1-42 (ng/L)	T-tau (ng/L)	P-tau (ng/L)	AP2B1_712-719 (L/H)a	AP2B1_835-842 (L/H)a	AP2B1_868-878 (L/H)a	APP_289-301 (L/H)a	APP_439-450 (L/H)a	BSA_421-433 (L/H)a	C9_146-154 (L/H)a	C9_186-194 (L/H)a	C9_232-242 (L/H)a	C9_473-483 (L/H)a	C9_497-508 (L/H)a	CTSB_58-71 (L/H)a	CTSB_80-87 (L/H)a	CTSB_210-220 (L/H)a	CTSD_55-72 (L/H)a	CTSD_112-122 (L/H)a	CTSD_349-357 (L/H)a	CTSF_103-116 (L/H)a	CTSF_236-245 (L/H)a	CTSF_266-278 (L/H)a	CTSF_442-450 (L/H)a	CTSL_105-116 (L/H)a	CTSZ_39-47 (L/H)a	CTSZ_261-270 (L/H)a	DPP7_40-47 (L/H)a	DPP7_113-123 (L/H)a	DPP7_449-462 (L/H)a	GM2A_89-96 (L/H)a	GM2A_170-179 (L/H)a	HEXB_285-300 (L/H)a	HEXB_391-400 (L/H)a	LAMP1_138-146 (L/H)a	LAMP1_327-337 (L/H)a	LAMP1_357-363 (L/H)a	LAMP2_133-144 (L/H)a	LAMP2_145-152 (L/H)a	LAMP2_153-161 (L/H)a	LAMP2_281-289 (L/H)a	LYZ_52-59 (L/H)a	LYZ_69-80 (L/H)a	FUCA1_114-130 (L/H)a	FUCA1_163-173 (L/H)a
LB131-7_170327_Plate1_1098_2_13	AD	58	F	1	376	845	132	1.38995	1.69911	2.76718	1.90294	1.73503	1.13129	1.13769	0.520212	1.85716	1.94983	2.77766	0.506851	0.856365	0.487884	0.646442	0.969815	0.68085	0.452829	0.73619	0.936219	0.848725	0.973942	1.08149	0.86198	0.485545	0.645133	0.264117	1.32117	2.42257	1.04227	0.82724	1.09821	0.913064	0.758064	4.80383	1.49822	0.0671682	1.32386	0.724578	0.455303	0.0806636	0.868377
LB131-7_170327_Plate2_1194_19	AD	75	M	1	421	564	67	0.625484	0.670227	1.14589	0.725988	0.728392	0.957644	1.58809	0.718434	2.90546	2.8302	3.93401	0.299171	0.551378	0.350523	0.232325	0.752103	0.550784	0.373363	0.673938	0.686304	0.608049	0.687061	0.850471	0.754392	0.740842	0.968639	0.603625	0.721534	0.815772	0.865088	0.659581	0.851616	0.78542	0.591346	2.11818	0.695009	0.0311483	0.685154	0.813153	0.534665	0.0579491	0.575495
LB131-7_170327_Plate1_1226_2_22	AD	77	M	3	459	898	116	1.18826	1.4119	2.01	1.89293	2.09465	1.0965	2.23521	1.03916	4.84179	4.22397	6.77898	0.737257	1.04084	0.744205	1.3995	1.61468	1.34207	0.76297	1.30726	1.72688	1.35226	1.6528	1.45451	1.22975	1.98653	2.48626	1.60506	1.24816	2.11006	2.13775	1.5656	1.91773	2.0545	1.56043	4.88432	1.86932	0.0871513	1.45248	1.52414	0.822155	0.186538	2.09857
LB131-7_170327_Plate1_1246_28	AD	83	M	2	459	490	86	1.14377	1.2875	1.70453	1.0194	1.19213	1.30647	1.60393	0.639722	2.41039	2.55259	3.74131	0.504497	0.763151	0.484372	0.827419	0.963761	0.825635	0.597811	1.01134	1.20848	1.11488	0.982322	0.965372	0.781611	0.903648	0.846525	0.735609	1.00148	1.26772	1.17906	1.01248	1.12627	1.1276	0.95447	3.30858	1.08443	0.0600916	1.12897	0.600734	0.363381	0.0873838	0.932087
LB131-7_170327_Plate2_1269_22	AD	65	M	1	218	553	93	0.588696	0.740048	1.18223	1.23953	1.28313	1.0498	0.78267	0.343311	1.24151	1.26759	1.84175	0.344585	0.606263	0.39556	0.846181	1.1005	0.869795	0.291535	0.55367	0.57533	0.538322	0.730677	0.611669	0.656993	0.647056	1.09518	0.420503	0.526367	0.726031	0.959792	0.56573	0.852774	0.801649	0.58644	2.36543	0.771774	0.0429158	0.833933	0.448772	0.244135	0.0933324	0.926136
LB131-7_170327_Plate1_1520_39	AD	55	F	2	361	633	103	1.06248	1.11969	1.57042	1.39417	0.315002	1.40077	0.598139	0.240494	1.20835	1.28967	2.01635	0.664924	0.844291	0.68216	1.31259	1.59792	1.07157	0.603613	0.839917	1.15508	1.01082	1.28611	0.92032	1.23881	1.32648	1.51284	0.765316	0.678731	0.858112	2.41992	1.30134	1.09298	1.2389	1.25066	3.83815	1.18813	0.0450297	1.30993	0.620656	0.457906	0.115223	1.28385
LB131-7_170327_Plate2_619_06	prodromal AD	57	F	4	230	475	82	0.547829	0.664281	0.720914	1.23785	1.23734	1.62735	0.646281	0.250617	1.38133	2.18129	2.79354	0.761191	0.705948	0.431525	1.32656	1.72445	0.657852	0.71793	0.687684	0.974197	0.69081	0.915847	0.868509	0.725703	0.774278	1.20233	0.485759	0.57057	0.789232	2.74533	1.36734	0.880142	0.84956	0.799354	4.73807	1.01217	0.0370091	1.72539	0.437645	0.31003	0.209187	1.22307
LB131-7_170327_Plate1_1102_2_14	prodromal AD	57	M	5	384	528	78	0.702012	0.819153	2.28011	1.8248	2.19898	1.13993	0.664341	0.248376	1.11233	1.18615	1.64551	0.447574	0.624887	0.495721	0.923672	1.17793	0.95628	0.55749	0.891113	1.09483	0.94285	1.18796	1.26571	0.981439	1.90771	1.82257	1.08489	0.810438	1.20062	2.14374	1.45962	1.44023	1.72206	1.01348	3.42773	1.01866	0.0544528	0.877438	0.62482	0.379676	0.109522	1.20214
LB131-7_170327_Plate1_1112_2_18	prodromal AD	67	F	3	359	1062	169	1.14386	1.30909	2.66286	1.39837	1.87805	1.18597	1.71984	0.575521	2.26643	2.3488	3.38879	0.529134	0.807383	0.530724	0.488397	1.11375	0.873012	0.546297	0.885982	1.19373	0.964709	1.30295	1.43195	1.01658	1.17177	1.92699	0.679348	0.91564	1.03231	1.75353	1.27304	1.66004	1.61493	1.403	4.59718	1.56962	0.0719244	1.64168	1.0934	0.485585	0.0588971	0.63686
LB131-7_170327_Plate1_1123_2_20	prodromal AD	72	F	2	366	1215	300	1.5543	1.89814	3.55986	2.30531	3.063	1.10703	0.695146	0.342737	1.3395	1.46955	2.1071	0.483421	0.956164	0.642257	1.35726	1.29717	0.973282	0.562473	0.905506	1.13067	0.969029	1.26664	1.11776	0.985683	1.46388	1.57829	0.722366	1.22397	1.69524	1.64758	1.15518	1.61789	1.56277	1.28164	6.37649	1.91833	0.118501	2.14857	0.763472	0.403622	0.0944415	1.05728
LB131-7_170327_Plate1_1247_29	prodromal AD	60	F	2	231	800	129	0.807104	0.9459	1.55905	1.33851	1.40959	1.09224	0.248536	0.110222	0.410392	0.409956	0.653926	0.64334	1.00718	0.655006	1.15078	1.49746	1.22063	0.485104	0.81364	0.937081	0.833586	1.04362	0.794117	0.830629	1.01476	1.20753	0.679606	0.675578	0.980537	1.36805	1.11632	1.15212	1.38293	0.962653	3.2736	1.03075	0.0637433	1.15023	0.427891	0.263462	0.0766145	0.797129
LB131-7_170327_Plate2_1291_27	prodromal AD	77	M	1	471	421	82	1.05799	1.2104	2.22517	1.93289	2.39761	1.11232	1.62806	0.608865	2.5442	2.69386	3.74692	0.577765	1.00675	0.631954	1.58518	1.50563	1.24518	0.60786	1.07971	1.06568	1.10512	1.28388	1.51648	1.32601	2.15531	2.56362	1.68609	1.08366	1.39311	1.63708	1.18345	1.74694	1.69212	1.34835	4.55648	1.39532	0.0672409	1.58882	1.33747	0.691953	0.0968785	0.972738
LB131-7_170327_Plate2_1542_34	prodromal AD	61	F	3	547	585	73	0.662954	0.754196	1.32933	1.03778	1.4508	1.0504	1.08651	0.428334	1.93172	1.88491	2.49807	0.473715	0.807865	0.533967	0.849871	1.33453	1.11571	0.38375	0.616625	0.734356	0.615509	1.0469	1.02277	0.868818	1.33945	1.78504	0.862016	0.697338	0.782423	1.54825	1.02872	1.07259	1.02981	0.831127	2.84667	0.885304	0.0396737	1.01313	0.5425	0.296167	0.0506225	0.520559
LB131-7_170327_Plate2_1554_35	prodromal AD	74	F	2	453	851	110	1.12642	1.42704	2.34648	1.49959	1.85799	0.997153	0.573501	0.238763	1.02277	1.01822	1.34523	0.582393	0.982055	0.622378	0.796711	1.24529	0.858655	0.639848	1.00264	1.25061	1.17841	1.03331	1.18421	0.913764	1.09316	1.56118	0.816125	1.06151	1.981	1.53385	1.17758	1.41017	1.45172	1.11516	4.06713	1.23716	0.0707886	1.36553	0.588256	0.334232	0.143626	1.44285
LB131-7_170327_Plate1_1600_44	prodromal AD	65	F	2	503	583	62	0.667462	0.789445	1.07867	1.21853	1.15817	1.29435	2.63847	1.17842	4.40001	4.49197	6.62733	0.650539	0.77069	0.711299	1.30216	1.63938	1.27086	0.588851	1.01395	1.21966	1.25253	1.01076	1.25961	1.08723	1.31825	1.52391	0.852217	0.929582	1.54019	1.67421	1.20826	1.28338	1.22525	1.00349	3.29312	1.25593	0.0501425	1.2022	1.28702	0.543706	0.121693	1.18839
LB131-7_170327_Plate1_1635_51	prodromal AD	74	M	2	282	1190	162	1.36944	1.68437	3.07057	1.65645	1.99883	1.30287	1.03757	0.401824	1.95274	1.97309	2.68283	0.582924	0.947615	0.59256	1.18547	1.4463	1.05803	0.692687	1.11142	1.29616	1.26825	1.15405	1.22361	1.05706	1.43798	2.07851	1.2486	1.33389	1.87723	1.75073	1.29509	1.45489	1.40449	1.16555	4.71627	1.45489	0.0821239	1.59613	0.699274	0.458801	0.133309	1.35598
LB131-7_170327_Plate1_1120_2_19	PD	57	F	1	857	137	45	0.721482	0.858388	1.23125	1.81427	2.69131	1.13931	0.540822	0.248641	0.932335	0.985724	1.3904	0.468512	0.738823	0.494883	1.0687	1.09393	0.936115	0.377204	0.621871	0.802173	0.74533	1.14685	1.05348	0.939495	1.17132	1.29807	0.703452	0.950393	1.2011	1.51655	1.08155	1.18285	1.24485	0.894151	3.0309	0.905492	0.045744	1.10775	0.564997	0.312048	0.0676633	0.74038
LB131-7_170327_Plate1_1138_2_21	PD	47	F		1049	216	46	0.633398	0.761649	1.17111	0.776316	0.90669	1.13335	1.02446	0.429561	1.75176	1.72192	2.44762	0.343434	0.574848	0.327405	0.777172	1.07978	0.891876	0.377936	0.617819	0.795671	0.658632	0.754816	0.6313	0.559763	0.915648	0.918277	0.692419	0.660279	0.888992	1.33775	0.786788	0.695591	0.770734	0.501666	2.20434	0.718192	0.035702	0.762063	0.677949	0.379874	0.0803454	0.846292
LB131-7_170327_Plate2_1164_13	PD	78	M	1	1000	148	54	0.877739	1.05885	1.71754	1.10312	1.08093	1.03122	0.824903	0.340607	1.32567	1.38233	1.83091	0.531953	0.823684	0.510419	0.33954	0.884594	0.67142	0.308106	0.559001	0.602897	0.606751	0.828241	0.867944	0.867716	0.724742	1.06701	0.538783	0.557459	0.744418	0.890418	0.586764	0.994583	0.827761	0.63621	3.58463	1.08549	0.0634191	1.09897	0.638537	0.33393	0.0882754	0.852414
LB131-7_170327_Plate2_1165_14	PD	76	M	1	476	223	57	0.783081	1.05184	1.64303	1.44644	1.0797	1.00752	2.1339	0.762639	3.05518	3.22751	4.32892	0.574286	0.870762	0.582309	0.973588	1.47916	1.17715	0.620438	1.12067	1.29704	1.29831	1.01136	1.19542	0.933253	1.20603	1.33509	0.757317	1.1628	1.80636	1.10145	0.73952	1.55147	1.10023	0.91359	3.64582	1.23994	0.0551132	1.04014	0.785139	0.430245	0.0574454	0.558119
LB131-7_170327_Plate2_1176_18	PD	65	M		658	174	34	0.547332	0.608758	0.950018	0.968161	1.22227	0.983101	1.00806	0.347347	1.75705	1.41248	1.93511	0.420848	0.657295	0.41909	0.458972	1.26995	1.0467	0.472638	0.839595	0.894862	0.843851	0.97956	1.05327	0.876749	1.16241	1.62547	0.719781	0.663126	0.809044	1.37049	1.04783	1.11322	1.09647	0.783413	2.67603	0.783314	0.0368293	0.993687	0.763459	0.409492	0.0718329	0.711322
LB131-7_170327_Plate2_1224_21	PD	55	F	1	615	111	15	0.296827	0.325923	0.617863	0.693289	0.832329	1.04172	0.796842	0.315239	1.1825	1.15483	1.67642	0.246856	0.42335	0.296625	0.229887	0.690314	0.572	0.225144	0.428388	0.427527	0.406395	0.579319	0.543134	0.587548	0.769333	1.09865	0.463129	0.303418	0.402938	0.871876	0.5019	0.646214	0.44009	0.403058	1.48815	0.476078	0.0243584	0.531111	0.528523	0.257145	0.0589211	0.591844
LB131-7_170327_Plate1_1234_2_23	PD	63	F	1	1051	117	33	0.664784	0.741365	1.18525	1.10747	1.51726	1.21293	0.649476	0.299907	1.09584	1.19692	1.67475	0.377677	0.677657	0.438599	0.983979	1.16005	0.838542	0.442607	0.709397	0.837261	0.7024	0.941873	1.30308	0.829216	0.995298	1.30997	0.728837	0.601996	0.929831	1.48311	0.872601	0.95801	0.92491	0.655557	2.90143	0.799749	0.0388881	0.936068	0.371656	0.212814	0.0818302	0.905698
LB131-7_170327_Plate1_1239_26	PD	49	F	1	933	74	24	0.528072	0.629202	0.81494	0.925602	1.08404	1.27003	0.807279	0.311203	1.26816	1.33605	1.94452	0.273844	0.507814	0.301439	0.736275	0.906751	0.752074	0.360386	0.672699	0.731984	0.643866	0.79512	0.543132	0.64927	0.903909	1.05609	0.57389	0.526754	0.777439	1.03348	0.815642	0.80758	0.798646	0.59101	2.27924	0.753553	0.0249078	0.715494	0.529056	0.354789	0.0738367	0.774885
LB131-7_170327_Plate1_1244_27	PD	62	M		458	159	34	0.528127	0.649822	0.803635	1.30759	1.54778	1.29934	0.753339	0.283939	1.11145	1.18493	1.77299	0.411167	0.517356	0.394336	0.94585	1.12173	0.907295	0.444088	0.701459	0.947272	0.764968	0.933354	0.992972	0.952342	1.47631	1.96196	1.01419	0.714603	0.824584	1.72197	1.22683	1.04233	1.07878	0.768805	2.83574	0.801269	0.0491114	0.968619	0.442203	0.26115	0.0479707	0.48757
LB131-7_170327_Plate1_1264_31	PD	58	M		852	104	23	0.483156	0.535336	0.709822	0.874017	0.892487	1.00391	2.26769	0.886336	3.19714	3.93834	5.73309	0.571022	0.901181	0.576819	1.11647	1.33077	1.19177	0.503157	0.877323	1.12228	0.943932	0.966086	1.1056	0.922394	0.952355	1.34337	0.671308	0.689394	0.871091	1.50332	1.17122	0.963808	0.923539	0.807909	1.96885	0.863528	0.0177577	0.744277	1.03266	0.54904	0.11495	1.21434
LB131-7_170327_Plate1_310_04	stable MCI	67	M	4	1530	200	60	0.673501	0.806473	1.07532	1.17044	1.56429	1.01866	0.44272	0.187555	0.739026	0.732621	1.04691	0.247405	0.556225	0.352177	0.24708	0.663355	0.566165	0.334527	0.539394	0.672314	0.630881	0.78312	0.809407	0.648396	0.744301	0.890907	0.492076	0.70654	1.00348	1.1234	0.798445	0.845811	0.695637	0.600908	2.71542	0.781111	0.0341282	0.866034	0.206438	0.154044	0.0580653	0.622893
LB131-7_170327_Plate1_313_05	stable MCI	59	M	2	1620	155	59	0.945107	1.26501	1.81974	1.73053	2.42243	0.984994	1.14898	0.489237	1.99506	2.14227	3.08485	0.618974	0.896484	0.717671	0.402271	1.06799	0.890736	0.567568	1.05204	1.33117	1.27532	1.28225	0.980087	0.88342	1.49965	1.74828	0.727741	1.01654	1.38557	1.70939	1.20531	1.45695	1.61934	1.15852	3.45664	1.28181	0.0520691	1.09766	0.59371	0.424775	0.0992421	1.09418
LB131-7_170327_Plate1_314_06	stable MCI	58	M	2	1570	125	52	0.822568	1.02663	1.24435	2.23991	2.99387	0.990103	0.511149	0.299203	1.05405	1.08904	1.53719	0.591729	0.940361	0.62906	0.401047	0.907106	0.814289	0.555071	0.997458	1.15001	1.14342	1.24093	1.14156	1.02001	1.2036	1.42959	0.889974	0.820099	1.20772	1.8795	1.3826	1.47621	1.78758	1.10008	3.76335	1.20818	0.0640516	1.12846	0.324051	0.250183	0.0962088	1.10668
LB131-7_170327_Plate2_455_04	stable MCI	76	M	4	882	228	43	0.640973	0.687452	0.896933	1.01621	1.19024	1.49484	1.25927	0.550014	2.41519	3.35578	4.538	0.578443	0.687257	0.429579	1.266	1.80054	0.895909	0.708815	0.780965	1.1022	0.926207	1.0123	0.831833	0.693223	0.862221	0.975651	0.596446	0.745285	1.09423	1.82596	0.954943	0.910263	0.764792	0.757077	3.89149	1.01672	0.0311456	1.165	0.529387	0.519776	0.0891555	0.6366
LB131-7_170327_Plate2_592_05	stable MCI	80	M	1	997	275	55	0.272237	0.308251	0.308664	0.496155	0.600542	1.55016	0.651914	0.235096	1.18482	1.67426	2.28048	0.303147	0.330956	0.194101	0.246498	0.690285	0.314494	0.322273	0.306869	0.464522	0.283372	0.413682	0.25803	0.276486	0.371365	0.467488	0.241122	0.337059	0.415039	0.784934	0.439915	0.370416	0.348614	0.261226	1.91351	0.435225	0.0200048	0.658307	0.192569	0.132301	0.0530375	0.336663
LB131-7_170327_Plate2_1280_23	stable MCI	55	F	2	2066	383	75	1.554	2.02501	2.88198	2.49631	2.39981	0.957269	1.61526	0.689831	2.85589	2.69874	3.84995	0.839433	1.70318	0.873564	1.37911	1.93542	1.46635	0.81401	1.3196	1.43692	1.50018	1.43894	1.68607	1.48044	1.33001	1.69676	0.787095	1.6373	2.36959	2.1365	1.4147	1.86247	1.59327	1.59264	7.05547	2.39581	0.119505	2.49257	1.24858	0.631582	0.19214	2.03608
LB131-7_170327_Plate2_1290_26	stable MCI	73	F	4	402	307	59	0.808612	0.721384	1.27121	1.54709	1.94655	1.0858	2.05423	0.846282	4.18096	3.66729	5.32429	0.62746	3.10714	0.343699	0.999302	1.27905	0.963502	0.505007	0.771703	0.943144	1.0101	1.0222	0.972459	0.94262	1.43159	2.58053	0.989351	0.743855	1.33219	1.6348	0.842815	1.62891	1.97799	2.08761	3.46779	1.8148	0.0522007	1.11494	0.982455	0.479994	0.131482	1.33607
LB131-7_170327_Plate2_1322_29	stable MCI	71	F	4	1132	194	34	0.779097	0.811537	1.23432	1.87398	2.01304	0.972911	2.07576	0.916789	4.24271	4.0209	5.54694	0.434629	0.812478	0.607745	1.05747	1.38325	1.07151	0.380125	0.667739	0.725578	0.739593	1.02962	1.12192	0.939254	1.29174	1.90324	0.890341	0.667802	0.88902	1.7969	1.21562	1.39911	1.32056	1.15726	3.04534	1.22543	0.0480059	1.14473	0.929471	0.492656	0.127029	1.30416
LB131-7_170327_Plate2_1334_30	stable MCI	67	M	3	908	231	40	0.674376	0.734659	1.12823	0.907735	1.04687	0.954476	1.59404	0.762225	3.02735	2.90228	4.21749	0.415882	0.71166	0.551107	0.791127	1.26005	1.03491	0.49643	0.827141	0.827381	0.869154	1.06003	1.13057	0.938864	0.920582	1.25452	0.617237	0.733014	0.924367	1.35293	0.909304	1.09425	0.943275	0.861294	2.49816	0.830123	0.0443511	0.947362	0.710297	0.448806	0.0984888	1.03062
LB131-7_170327_Plate1_1463_36	stable MCI	76	M	3	844	332	42	1.20789	1.67492	2.07333	1.73265	2.16903	1.1994	2.51383	1.22055	4.43153	4.66987	7.79953	0.578681	0.821362	0.74811	1.15012	1.41821	1.08371	0.611626	1.05687	1.24588	1.19613	1.52039	1.1338	1.03413	1.40293	1.83853	0.685751	1.07922	1.72552	1.98681	1.47765	1.61584	1.53702	1.78376	4.4028	1.70791	0.0612664	1.48593	0.537507	0.405166	0.126941	1.37434
LB131-7_170327_Plate2_1576_39	stable MCI	80	F	4	544	388	59	0.616597	0.723284	1.17072	0.927741	0.979146	1.00078	1.22437	0.563682	1.96881	2.20484	3.01746	0.394576	0.712112	0.420204	0.760704	1.09706	0.860077	0.467141	0.750007	0.832285	0.818566	0.813496	0.825364	0.834952	0.849851	1.2345	0.547648	0.716097	1.21258	0.917185	0.611412	0.828439	0.857312	0.638895	2.10524	0.651643	0.0287425	0.761206	0.611283	0.31017	0.067435	0.690942
LB131-7_170327_Plate1_1601_45	stable MCI	67	M	2	1316	321	63	1.0088	1.21016	1.91348	1.73222	1.92046	1.06846	0.873907	0.368465	1.48086	1.56661	2.30298	0.420459	0.89409	0.508524	0.763264	1.15418	0.871756	0.690479	1.22048	1.26692	1.16815	1.1266	0.983501	0.891915	1.17315	1.56191	0.942184	0.922705	1.22444	1.76678	1.22881	1.26315	1.15607	1.04145	4.39452	1.27066	0.0615797	1.46586	0.613869	0.369146	0.147248	1.44617
LB131-7_170327_Plate1_1615_46	stable MCI	64	M	2	1532	268	54	1.06119	1.19006	1.59774	2.03155	2.0278	1.32247	1.04446	0.467608	1.92394	1.95763	2.65516	0.58373	0.976355	0.56505	1.07404	1.50074	1.00816	0.735715	1.15789	1.13877	1.27768	1.23719	1.37163	1.21169	1.47558	1.88734	1.0493	1.13807	1.87302	1.81305	1.29127	1.49162	1.436	1.09745	4.3281	1.23933	0.0487588	1.46907	1.29561	0.557777	0.112355	1.12847
LB131-7_170327_Plate1_1645_52	stable MCI	80	F	2	1450	187	29	0.457649	0.540722	0.727471	0.728479	1.01376	1.25709	1.33538	0.51376	2.22882	2.22059	3.06266	0.480354	0.748787	0.51678	0.313938	0.886173	0.691257	0.432908	0.780125	0.807793	0.771609	0.747329	0.747696	0.683472	0.734851	0.860149	0.385275	0.528762	0.599657	1.14576	0.872468	0.761478	0.723177	0.589852	1.9821	0.638662	0.0364436	0.689709	0.519286	0.255218	0.0804682	0.786561
LB131-7_170327_Plate2_1697_44	stable MCI	52	F	2	1153	152	31	0.469747	0.543856	1.12227	1.06476	1.70304	1.1951	0.78524	0.361984	1.40404	1.48145	2.06902	0.504452	0.659253	0.484159	1.19489	1.42963	1.01253	0.500141	0.801646	0.923155	0.805731	0.872328	0.674218	0.848136	1.49217	1.70595	0.76747	0.476214	0.704704	1.65149	0.928285	0.889682	0.652247	0.564625	2.38332	0.602861	0.0257634	0.709651	0.507959	0.304299	0.0938488	0.86338
aPeptide measurements show the area ratio of tryptic to stable isotope-labeled peptide (L/H).
[truncated: 9 more columns]

## Sheet: Clinical Study II
Table S3. Demographic and biomarker data in Clinical Study II.
Sample	Group	Age	Gender	APOE Genotype	Aβ1-42 (ng/L)	T-tau (ng/L)	P-tau (ng/L)	AP2B1_712-719 (L/H)a	AP2B1_835-842 (L/H)a	AP2B1_868-878 (L/H)a	APP_289-301 (L/H)a	APP_439-450 (L/H)a	BSA_421-433 (L/H)a	C9_146-154 (L/H)a	C9_186-194 (L/H)a	C9_232-242 (L/H)a	C9_473-483 (L/H)a	C9_497-508 (L/H)a	CTSB_58-71 (L/H)a	CTSB_80-87 (L/H)a	CTSB_210-220 (L/H)a	CTSD_55-72 (L/H)a	CTSD_112-122 (L/H)a	CTSD_349-357 (L/H)a	CTSF_103-116 (L/H)a	CTSF_236-245 (L/H)a	CTSF_266-278 (L/H)a	CTSF_442-450 (L/H)a	CTSL_105-116 (L/H)a	CTSZ_39-47 (L/H)a	CTSZ_261-270 (L/H)a	DPP7_40-47 (L/H)a	DPP7_113-123 (L/H)a	DPP7_449-462 (L/H)a	GM2A_89-96 (L/H)a	GM2A_170-179 (L/H)a	HEXB_285-300 (L/H)a	HEXB_391-400 (L/H)a	LAMP1_138-146 (L/H)a	LAMP1_327-337 (L/H)a	LAMP1_357-363 (L/H)a	LAMP2_133-144 (L/H)a	LAMP2_145-152 (L/H)a	LAMP2_153-161 (L/H)a	LAMP2_281-289 (L/H)a	LYZ_52-59 (L/H)a	LYZ_69-80 (L/H)a	FUCA1_114-130 (L/H)a	FUCA1_163-173 (L/H)a
LB131-10_170825_Pl2_1_61_2	Control	72	M	E2/E3	837	342	52	0.864555	1.13853		1.29717	1.45567	0.902335	1.58048	0.65362	2.65528	2.59952	3.50555	0.494398	0.799475	0.652622	1.05377	1.35485	0.918787	0.611727	0.990522	1.18345	1.1831	1.20456	1.15277	0.907859	1.51064	1.53495	0.9507	1.13771	1.71023	1.42154	0.954909	1.16916	0.939159	0.791956	3.86758	1.19542	0.0601402	1.19475	0.912011	0.483968	0.129314	1.45416
LB131-10_170628_Pl1_1_25_28	Control	68	M	E3/E3	726	190	31	0.548374	0.77249		0.764432	0.905578	1.14026	2.22702	0.870036	3.37421	3.60861	5.86779	0.432257	0.758004	0.496042	1.03381	1.01505	0.89453	0.499442	0.814104	1.09762	0.975468	0.783177	0.773241	0.638345	1.03478	1.38135	0.652443	0.764886	1.14015	1.04562	1.00847	0.906122	0.806807	0.658656	2.45013	0.768432	0.0364717	0.773167	0.778398	0.326576	0.0580903	0.70761
LB131-10_170628_Pl1_1_60_49	Control	71	M	E3/E4	391	245	40	0.839284	0.845403		1.54982	2.13705	0.986206	1.23929	0.509315	2.04018	1.96273	3.03976	0.512438	0.718841	0.419475	1.06991	1.48933	1.04622	0.669319	1.26461	1.34773	1.26687	1.11652	0.937671	0.942912	1.22658	1.88611	0.747264	1.05444	1.3955	1.69247	1.26007	1.40476	1.01965	0.875989	4.75614	1.35024	0.0593922	1.26879	0.919619	0.448185	0.0500755	0.620417
LB131-10_170825_Pl2_1_28_56	Control	73	F	E3/E4	1202	390	54	0.988208	1.47363		2.13184	2.67567	0.841083	1.00812	0.39665	1.50496	1.56938	2.27118	0.561203	0.996352	0.689518	1.05419	1.27357	0.946471	0.482321	0.892595	1.01144	0.895027	1.46622	1.21015	1.26312	1.16777	1.68415	0.690177	1.27868	1.83205	2.02604	1.17885	1.65433	1.48708	1.17659	5.41463	1.58319	0.0862976	1.79855	0.998711	0.489305	0.125856	1.41157
LB131-10_170825_Pl2_1_58_63	Control	81	F	E2/E3	1130	393	53	1.0312	1.26856		1.89713	2.43656	0.839845	1.83704	0.819952	3.08504	3.19691	4.87297	0.541784	0.989016	0.729685	0.790319	1.01872	0.720822	0.629528	1.18401	1.25332	1.30854	1.2628	1.24663	1.13432	1.38868	2.1901	0.873245	1.42699	1.84128	1.71782	1.10719	1.51369	2.02386	1.05632	3.94692	1.33355	0.0630894	1.2426	1.42452	0.537896	0.102831	1.31613
LB131-10_170825_Pl2_1_74_3	Control	74	F	E3/E3	996	409	52	0.974857	1.16521		1.29766	1.76814	0.922657	1.57092	0.711975	2.57209	2.78077	3.63331	0.567179	0.988297	0.672933	0.910924	1.05259	0.695751	0.53165	0.953435	0.999726	1.00992	0.954548	0.959473	0.967375	0.829657	1.93686	0.65894	1.22424	1.61754	1.43557	0.859965	1.12851	0.867117	0.752357	3.30519	0.950183	0.0536096	0.926793	0.519598	0.331014	0.131497	1.46441
LB131-10_170825_Pl2_1_59_20	Control	69	F	E3/E3	1698	461	61	1.29671	1.53848		3.74178	4.6522	0.91813	1.402	0.543887	2.28339	2.1865	3.27995	0.699641	1.04377	0.684348	1.34266	1.33154	0.929458	0.685056	1.17523	1.23553	1.15857	1.68946	1.63132	1.11182	1.40506	1.33449	1.56991	1.24218	1.65257	2.30659	1.56788	2.03878	2.27634	1.4618	4.99909	1.50788	0.0654947	1.55368	0.52477	0.31061	0.137474	1.58168
LB131-10_170825_Pl2_1_18_9	Control	79	F	E3/E3	1159	469	65	1.37194	1.58182		1.62287	1.97743	0.905257	1.55202	0.638675	2.55536	2.53417	3.96249	0.444273	1.11965	0.660323	0.907127	1.20702	0.753512	0.640978	1.02878	1.11828	0.95815	1.34948	1.31615	1.00185	1.50389	1.80135	1.52989	1.66886	2.52999	1.82354	1.4253	1.36806	1.21888	0.896897	4.80994	1.49738	0.0695674	1.51766	1.03363	0.616426	0.112503	1.25636
LB131-10_170825_Pl2_1_83_49	Control	67	F	E3/E3	1595	372	57	1.12393	1.35844		2.07504	2.20406	0.826102	2.05526	0.758316	2.89493	3.13025	4.45193	0.470745	0.910535	0.619913	0.90418	1.29254	0.901807	0.567688	0.990954	1.08328	1.05203	1.19407	0.840635	0.816169	1.60989	2.13253	0.900553	1.31437	2.02933	0.817689	0.59547	1.38946	1.79073	0.957803	4.2338	1.41702	0.059042	1.29882	0.859721	0.358497	0.112019	1.35833
LB131-10_170825_Pl2_1_5_25	Control	75	M	E3/E3	1285	381	48	0.885341	1.01834		1.21128	1.57104	0.897341	2.43422	0.913595	3.01655	3.75559	5.47402	0.512755	1.08274	0.602048	0.849847	1.29473	0.888651	0.778299	1.17808	1.36012	1.33154	1.15739	0.841601	1.03174	0.826915	0.551116	0.534651	1.23283	1.77709	1.45758	1.26625	1.25695	1.49353	0.93303	3.43232	1.15258	0.037131	0.788901	1.34277	0.790022	0.0307606	0.361558
LB131-10_170825_Pl2_1_52_58	Control	77	M	E3/E4	959	310	46	0.894628	1.18282		1.63205	1.67162	0.854211	1.4318	0.601345	2.07594	2.30371	3.33257	0.502332	0.976536	0.637289	1.03408	1.1681	0.823348	0.509474	0.948789	1.11383	0.91453	1.37877	1.18159	1.12094	1.09612	1.55907	0.812939	1.13738	1.67258	1.73901	1.0715	1.57996	1.32032	1.03578	5.61973	1.67676	0.0931125	1.96848	2.67754	1.57456	0.141475	1.58655
LB131-10_170825_Pl2_1_49_17	Control	74	F	E3/E4	217	294	42	0.667321	0.798041		0.960495	0.981058	0.917113	2.14966	0.786062	3.28298	3.27611	4.54456	0.426693	0.754315	0.480732	0.635244	1.30155	0.866002	0.448374	0.727705	0.822832	0.81618	0.815589	0.693214	0.636841	0.610943	0.45659	0.35245	0.738856	0.989843	1.27605	0.989079	0.945034	0.741817	0.535913	2.64996	0.794935	0.0406721	0.770597	0.696079	0.416235	0.0425026	0.480265
LB131-10_170628_Pl1_1_55_23	Control	73	F	E3/E3	738	258	33	0.657477	0.693214		1.62572	1.80434	1.01425	1.51117	0.584038	2.16559	2.29939	3.7985	0.843311	1.1934	0.768381	1.09216	1.31964	1.00482	0.57749	1.05374	1.2494	1.00592	1.19889	1.43184	1.16111	1.6664	2.44976	1.0866	0.863613	1.19518	1.83654	1.46428	1.29601	1.25773	0.70195	2.92281	0.915701	0.041733	0.873592	0.903403	0.382589	0.0908343	1.08275
LB131-10_170628_Pl1_1_13_33	Control	81	M	E3/E3	1100	424	54	1.27434	1.34333		0.879139	1.07026	1.14718	1.31453	0.55829	2.70772	2.60173	4.46798	0.603915	1.20101	0.636327	1.02353	1.38054	0.946664	0.511507	0.657714	1.02751	1.00238	1.17898	0.809313	0.752198	0.745623	0.964041	0.683919	1.38334	1.68276	1.30618	1.03975	1.04891	1.04322	0.940811	4.74123	1.29188	0.0623977	1.3928	0.929462	0.492068	0.0723842	0.884486
LB131-10_170628_Pl1_1_80_61	Control	77	F	E3/E3	1284	408	56	1.05025	1.24061		1.48804	2.09313	1.07588	1.20721	0.416358	1.75793	1.80651	2.73976	0.310616	0.769215	0.50288	0.807923	1.14986	0.844531	0.64748	0.956378	1.18488	1.1869	1.2217	0.848806	0.834842	1.23225	2.84557	1.28407	1.08187	1.55525	1.56088	1.18563	1.27425	1.22842	0.772613	4.15074	1.28609	0.0764323	1.28316	0.704353	0.27579	0.0985616	1.18529
LB131-10_170628_Pl1_1_33_36	Control	73	F	E3/E3	961	290	35	0.789815	0.812681		1.50025	2.24839	1.09624	1.46707	0.599415	2.60252	2.43798	4.3794	0.637575	0.993631	0.605632	0.611462	1.32894	1.00445	0.561819	0.882863	1.10853	1.1259	1.19958	0.899153	0.78125	0.691899	0.701614	0.367664	0.983794	1.38281	1.60425	1.13672	1.12075	1.14537	0.817051	3.27971	0.955885	0.0451466	1.00123	0.596932	0.313606	0.126676	1.56243
LB131-10_170825_Pl2_1_76_44	Control	67	F	E3/E4	663	374	49	0.793344	0.955156		1.66444	2.91803	0.82872	1.07484	0.423877	1.69588	1.68337	2.48567	0.342547	0.726057	0.477682	0.825509	1.22355	0.779656	0.442042	0.704781	0.859487	0.814004	1.14137	0.963884	0.987089	0.334888	0.452826	0.218368	0.933871	1.28645	1.68414	1.31087	1.39856	1.05094	0.883515	3.36627	1.10838	0.0551748	1.1385	0.773842	0.350593	0.125371	1.42862
LB131-10_170628_Pl1_1_30_29	Control	76	F	E3/E3	528	383	51	1.43019	1.62393		2.7172	3.79342	1.27851	2.32164	0.88464	4.55784	5.03765	8.42899	0.973111	1.39054	1.16354	1.92775	2.25387	1.54308	0.836009	1.2849	1.54204	1.92126	2.07735	1.28704	1.59224	2.15533	4.27533	1.53215	1.78301	2.40999	2.95035	2.41396	1.81004	1.81877	1.8518	7.4134	2.2572	0.0756711	2.23411	1.09555	0.629743	0.0745993	0.950341
LB131-10_170825_Pl2_1_6_24	Control	72	F	E3/E4	647	197	31	0.577274	0.605979		1.13976	1.37863	0.903455	0.63204	0.258298	1.12052	1.09488	1.61238	0.503385	0.875684	0.562027	0.808504	1.30365	0.87269	0.541044	0.850871	1.11947	0.931348	0.850267	0.735224	0.714521	1.17259	1.20599	0.838023	0.721591	1.03719	1.1928	0.960452	0.911519	0.696479	0.626556	2.74608	0.747639	0.0402126	0.828089	0.676369	0.420317	0.0656409	0.719242
LB131-10_170628_Pl1_1_10_41	Control	67	M	E3/E3	1144	295	43	0.929893	0.857812		1.30404	1.92225	1.04007	1.38558	0.557677	2.49576	2.55789	4.0478	0.411459	0.806583	0.504049	1.25455	1.60671	1.19738	0.525578	0.961341	1.06006	1.01051	0.958506	0.564265	0.724742	1.42479	2.3579	1.40514	1.06575	1.44939	1.55032	1.0531	1.18514	1.0329	0.80595	3.0169	0.887844	0.0470309	1.0238	1.12225	0.441829	0.115013	1.33387
LB131-10_170825_Pl2_1_1_4	Control	66	M	E3/E4	1258	344	69	1.19818	1.62291		2.01417	2.53271	0.93954	1.05595	0.459988	1.71529	1.9005	2.58861	0.737988	1.56915	0.916964	0.336943	0.361469	0.26922	0.577647	0.980767	1.14574	1.06126	1.2995	1.26686	1.02967	2.09497	1.90462	1.44938	1.23542	1.91453	1.9111	1.19051	1.54547	1.76615	1.07002	5.00079	1.53978	0.0708896	1.51415	1.02051	0.544122	0.110895	1.29909
LB131-10_170825_Pl2_1_17_26	Control	67	M	E4/E4	308	88	19	0.306486	0.343794		0.59248	0.672309	0.894172	1.56982	0.555279	2.20758	2.17987	3.54861	0.269365	0.478006	0.29842	0.405344	1.13622	0.859229	0.395683	0.619306	0.812743	0.652092	0.566132	0.625173	0.553054	0.313688	0.29336	0.244948	0.427781	0.562822	0.893752	0.29791	0.630128	0.436367	0.328871	1.65137	0.473365	0.0246392	0.465486	0.433093	0.252784	0.0531502	0.59984
LB131-10_170825_Pl2_1_91_37	Control	79	F	E2/E4	1131	320	43	0.758516	0.89959		1.32318	1.88352	1.14714	1.63142	0.662978	2.67068	3.48384	5.06723	0.527985	0.956237	0.503692	1.29024	1.67884	0.902181	0.723142	0.840304	1.24397	0.929753	1.00636	0.790159	0.712233	1.36842	1.37835	0.732929	0.870547	1.17361	2.25277	1.29969	1.16644	0.881722	0.717462	4.17974	0.992077	0.0614811	1.37266	0.754882	0.445173	0.105415	0.886639
LB131-10_170628_Pl1_1_94_34	Control	61	F	E3/E3	947	212	31	0.835598	0.874521		1.52552	2.40807	1.13462	2.07281	0.835968	4.26645	3.90848	6.73564	0.474956	0.800074	0.524966	1.29531	1.61824	1.16862	0.624767	1.22544	1.38438	1.28177	1.52069	0.83852	0.965708	2.13327	3.97663	1.07655	1.11233	1.55822	2.24244	1.47938	1.25455	1.22972	1.0349	3.9332	1.22806	0.0423664	1.13193	0.78251	0.357718	0.146075	1.78738
LB131-10_170628_Pl1_1_8_20	Control	78	F	E3/E3	817	300	39	0.829237	0.906555		1.39542	1.82354	1.02865	1.13547	0.425669	1.51598	1.68786	2.84769	0.49365	0.887172	0.559998	0.766226	0.988593	0.777336	0.467412	0.8183	1.02604	1.0073	1.17003	0.889389	0.799427	0.836765	1.52406	0.678519	1.14014	1.6759	1.33857	1.12544	1.13444	1.31886	0.743387	3.62366	1.0965	0.0573825	1.12892	0.893534	0.283916	0.116998	1.39816
LB131-10_170628_Pl1_1_50_26	Control	66	F	E2/E3	1215	290	43	1.02506	1.15801		1.5784	2.23167	1.05381	1.06352	0.382021	1.64053	1.58672	2.70264	0.50424	0.985844	0.578153	1.08976	1.20561	0.968269	0.565621	1.00071	0.927061	1.11494	1.24623	0.997758	0.838891	1.70663	2.11325	1.61697	1.28742	1.75971	1.86775	1.40273	1.2794	1.44075	0.916688	3.69036	1.06426	0.053796	1.18158	0.608279	0.361513	0.133628	1.64241
LB131-10_170825_Pl2_1_78_13	Control	66	F	E3/E4	1061	546	72	1.09983	1.4422		2.72024	3.29608	0.862728	1.59368	0.620982	2.49509	2.50539	3.71916	0.761784	1.47978	0.785761	1.19161	1.53348	1.07014	0.834684	1.26395	1.54655	1.63188	1.6805	1.25944	1.21411	1.37339	1.77529	1.00146	1.18399	1.65105	2.3565	1.53386	1.93777	1.88366	1.50758	5.62921	1.79807	0.0745816	1.6309	0.983363	0.63012	0.11972	1.32698
LB131-10_170628_Pl1_1_35_71	Control	80	F	-	1314	358	52	1.09835	1.35795		1.69272	3.02927	1.03508	1.25764	0.528899	2.42916	2.20219	3.46341	0.632854	0.900936	0.633841	1.02564	1.09928	0.795648	0.544973	1.04419	1.09314	1.25255	1.30503	1.03661	0.726201	2.11779	2.13963	1.22609	1.10506	1.63567	2.0173	1.24047	1.38491	1.21491	0.921115	4.56518	1.31357	0.0520518	1.25394	0.757431	0.378241	0.133153	1.57695
LB131-10_170628_Pl1_1_51_21	Control	62	F	-	861	289	42	0.768126	0.889758		1.08173	1.4957	1.02652	1.0312	0.445805	1.80244	1.83388	2.98697	0.540428	0.898666	0.619306	1.01912	1.20606	0.955924	0.559367	0.891804	1.19408	1.10282	1.16194	0.992934	1.0354	1.51375	1.72259	1.00146	0.915657	1.32768	1.64414	1.3143	1.36894	1.14967	0.850537	3.54176	1.06445	0.0524025	1.06222	0.536057	0.266284	0.10333	1.21535
LB131-10_170825_Pl2_1_29_30	Control	77	M	-	662	255	34	0.565674	0.683792		1.04135	1.22706	0.945132	3.11911	1.31446	4.5575	5.59295	8.46058	0.575202	0.893805	0.622654	1.16885	1.61139	0.949235	0.679709	1.10162	1.34199	1.19389	1.05953	1.29921	0.864699	0.808066	0.916557	0.538433	0.876095	1.0898	1.34634	1.10957	1.39679	1.20106	0.771218	3.02292	1.03005	0.0433307	0.831056	2.14509	1.05281	0.0387531	0.456571
LB131-10_170628_Pl1_1_92_67	Control	60	F	-	1153	393	54	1.12147	1.27704		2.53169	3.3155	1.07383	1.43272	0.559288	2.21192	2.39913	4.00334	0.43689	0.758165	0.500431	1.02504	1.13663	0.737755	0.582277	0.923765	1.0151	1.19261	1.15781	1.21437	0.939714	1.8098	3.08385	1.05608	1.34635	2.01708	1.33006	1.11933	1.55816	1.44586	0.93265	4.59026	1.26605	0.060644	1.3329	0.679623	0.320063	0.110912	1.27624
LB131-10_170628_Pl1_1_15_14	Control	83	M	-	878	329	46	0.9671	1.23058		1.52347	2.04327	0.997108	1.95872	0.81715	3.57299	3.13798	5.60319	0.547785	1.1277	0.618956	0.919317	1.1047	0.902036	0.449547	0.758085	0.972547	0.89895	1.16653	0.931005	0.891515	1.39965	2.04042	0.900989	1.29996	1.8641	1.55522	1.27973	1.33131	1.62554	0.970571	4.01178	1.18822	0.0644582	1.20289	0.493317	0.263798	0.0932187	1.19308
LB131-10_170628_Pl1_1_42_37	Control	75	F	-	966	291	40	0.952651	1.13221		1.52193	2.30573	1.11268	2.23616	0.890263	3.85043	3.65618	6.2607	0.614037	1.00162	0.745059	1.09799	1.54356	1.24129	0.619016	1.12446	1.32997	1.25955	1.28609	1.15285	1.01225	1.66667	2.57492	1.36901	1.20994	1.70407	1.98502	1.70677	1.31367	1.73333	0.999177	4.26369	1.24515	0.0606963	1.33275	1.03346	0.522023	0.0991198	1.2339
LB131-10_170628_Pl1_1_70_43	Control	75	F	-	319	272	34	0.45898	0.450993		0.817168	1.23219	1.09082	0.942073	0.34357	1.43554	1.42241	2.30287	0.405434	0.556262	0.418858	1.00576	1.32589	0.913166	0.429668	0.687889	0.761018	0.783332	0.758308	0.925336	0.683594	0.518718	0.688428	0.316403	0.6013	0.757124	1.38061	1.14651	0.876632	0.471798	0.56113	2.18862	0.598193	0.0328229	0.684063	0.330674	0.144919	0.058762	0.675159
LB131-10_170628_Pl1_1_46_18	Control	74	M	-	598	227	35	0.788302	0.884983		1.15693	1.21991	1.03386	2.66	1.13066	4.89393	4.63762	7.50996	0.56505	0.867561	0.610277	0.396343	1.08613	0.845	0.54431	1.05123	1.19528	1.19628	1.07871	0.837816	0.781104	0.696952	1.60071	0.903926	1.27096	1.83034	1.24961	0.95703	1.27115	1.39699	0.867428	3.85417	1.26468	0.060704	1.06858	1.3871	0.624724	0.0905143	1.15596
LB131-10_170628_Pl1_1_77_15	Control	81	M	-	540	371	48	0.858627	0.957821		1.09452	1.55066	1.03055	1.52092	0.644895	2.98385	2.58816	4.50983	0.638535	0.936612	0.622816	0.574604	1.18312	0.947194	0.578826	1.09502	1.26215	1.17304	1.25543	0.938995	0.835373	1.43624	2.15132	1.07349	1.19547	1.72466	1.40889	1.3578	1.20364	1.22595	0.910378	3.37046	1.05834	0.0628055	1.05976	0.787321	0.386753	0.052098	0.653972
LB131-10_170628_Pl1_1_66_55	Control	80	F	-	868	252	38	0.776353	0.981958		1.62826	2.25071	1.03717	1.61689	0.658108	2.77467	2.58222	3.88328	0.559229	0.859981	0.611066	1.24531	1.32135	1.06112	0.482004	0.835215	1.12032	1.0434	1.26388	1.43585	1.14698	1.31737	2.28478	0.888082	1.10227	1.51197	1.92097	1.28788	1.77387	1.3631	1.17026	5.05433	1.30077	0.0907343	1.28274	0.509551	0.276741	0.0936739	1.13633
LB131-10_170628_Pl1_1_31_44	Control	81	F	-	635	401	50	1.04344	1.21622		1.45903	1.89305	1.09049	1.66224	0.615796	2.50037	2.67898	4.44401	0.472718	0.936178	0.520767	0.838699	1.19584	0.928974	0.556857	0.842704	0.909038	0.959453	0.950636	1.14257	0.941359	1.24625	1.80877	0.725952	1.09627	1.45669	1.37071	1.16835	1.17919	0.900806	0.775581	3.46445	0.975874	0.0441347	1.08834	0.663522	0.294641	0.0761228	0.920054
LB131-10_170825_Pl2_1_56_54	Control	77	F	-	568	564	74	1.14031	1.29525		2.03231	2.65917	0.839052	0.437193	0.181483	0.622552	0.592069	1.10384	0.699438	1.3774	0.775382	1.56344	1.74977	1.22523	0.582997	1.08016	1.20017	1.16061	1.43169	1.20326	0.916076	1.46022	1.91076	1.10211	1.21596	1.96441	1.77751	1.08152	1.56238	1.68271	1.09091	4.12105	1.2969	0.0689042	1.24173	1.08234	0.519754	0.134546	1.56443
LB131-10_170628_Pl1_1_19_64	Control	76	M	-	812	265	41	0.820229	1.0908		0.884282	1.26388	1.06202	1.19475	0.474864	1.85299	1.95184	3.22622	0.23293	0.539387	0.412554	0.862359	0.996917	0.930832	0.493407	0.801676	0.863362	0.86846	0.797476	0.740374	0.683023	0.848751	1.06791	0.567464	0.905618	1.35195	1.18674	0.873612	1.07817	0.801023	0.65708	3.06562	0.811688	0.0458496	0.930039	0.744865	0.374056	0.0748903	0.895687
LB131-10_170825_Pl2_1_68_14	Control	81	F	-	1032	390	52	1.03859	1.18564		2.29968	3.19355	0.859169	1.68001	0.6144	2.51414	2.47537	3.46495	0.473117	1.05961	0.552258	1.3253	1.37034	0.90526	0.637076	1.14334	1.31143	1.32317	1.41331	1.15692	1.21637	2.02617	2.71219	1.55636	1.13507	1.67886	2.07567	1.49175	1.72002	1.86526	1.17142	4.41924	1.3875	0.0669389	1.43368	0.872261	0.456006	0.120841	1.41483
LB131-10_170628_Pl1_1_71_27	Control	78	F	-	751	213	28	0.659244	0.626473		0.910037	1.16067	1.09578	1.22821	0.483664	2.01158	1.98224	3.09766	0.497477	0.810808	0.545559	0.861703	1.03687	1.05211	0.495168	0.839145	1.02605	1.02835	1.00809	1.1193	0.856733	1.28759	1.66712	0.688723	0.893764	1.16117	1.1778	1.02943	1.09632	0.67472	0.607039	3.07491	0.9114	0.0477615	0.968959	0.717468	0.377272	0.102201	1.19117
LB131-10_170825_Pl2_1_54_46	Control	77	F	-	910	307	41	0.753832	0.853172		1.23166	1.63107	0.84163	2.44414	0.899799	3.96936	3.45081	5.58047	0.524137	1.14226	0.464815	1.05437	1.5361	0.806017	0.635354	0.948267	1.07117	1.07113	1.07276	1.19795	0.921538	1.40672	1.50502	0.874106	1.00113	1.4195	1.37268	0.986167	1.20697	1.36021	0.690556	3.11368	1.05927	0.0536549	0.883206	0.772268	0.603204	0.0459206	0.532754
LB131-10_170825_Pl2_1_41_16	Control	79	F	-	861	280	38	0.720285	0.895904		1.39559	1.89359	0.92444	1.20229	0.440996	1.81897	1.74639	2.72211	0.425987	0.799099	0.458368	0.840347	1.14143	0.76883	0.555278	0.870904	1.04071	1.0532	1.17989	1.1802	1.01339	1.46959	1.61631	1.02004	0.967693	1.13151	1.33258	1.05923	1.14935	1.00826	0.809715	3.56138	1.05593	0.0478725	1.12066	0.811258	0.470215	0.112385	1.24602
LB131-10_170628_Pl1_1_72_30	AD	77	M	E3/E4	476	559	68	1.54942	1.81751		2.12208	2.59849	1.20352	1.79832	0.754924	3.73482	3.8426	5.75899	0.830157	1.28126	0.88175	2.08707	2.29566	1.62473	1.00562	1.65092	1.97928	2.10453	2.14471	1.54458	1.64028	3.54979	5.80231	1.79506	1.62593	2.12907	3.1566	2.02253	2.15197	2.237	2.04991	7.16185	2.06075	0.0918521	1.92973	1.04727	0.515042	0.180393	2.27853
LB131-10_170628_Pl1_1_65_70	AD	77	M	E3/E4	399	1396	127	1.46845	1.59282		1.91114	2.43247	1.02006	2.97803	1.18101	5.93194	5.31488	7.56105	0.598513	1.08984	0.690739	1.0735	1.20231	0.966167	0.661281	1.48314	1.5307	1.62597	1.1951	0.657479	0.755072	1.65457	2.49698	1.04276	1.49232	1.97218	1.63899	1.14964	1.78396	1.75508	1.44834	4.60506	1.47738	0.0774478	1.53823	1.37551	0.579947	0.102186	1.27461
LB131-10_170825_Pl2_1_88_41	AD	62	M	E3/E3	426	479	65	0.60455	0.669309		1.0934	1.55528	0.82932	0.375322	0.118102	0.584074	0.488711	0.806392	0.373661	0.597811	0.466208	0.944717	1.25628	0.864532	0.368439	0.68288	0.831092	0.811545	1.02929	0.928328	0.850664	1.2944	1.74873	0.639887	0.7641	1.12041	1.29568	0.955477	1.07981	1.02763	0.727764	2.80824	0.794373	0.0498582	0.891237	0.440219	0.200636	0.0946385	1.03779
LB131-10_170825_Pl2_1_95_39	AD	68	M	E3/E3	420	1008	103	1.0492	1.2722		0.86225	0.8788	1.20064	2.58511	1.13795	4.5913	6.11093	8.52696	0.561428	0.882184	0.483789	1.09821	1.82297	0.852944	0.818675	0.969103	1.2172	1.04292	0.85689	0.759592	0.741725	0.79509	1.07249	0.377472	1.04136	1.52855	2.06585	1.17389	1.17688	1.22119	0.663928	5.20563	1.15762	0.0570068	1.76459	0.720657	0.423612	0.123837	0.922957
LB131-10_170628_Pl1_1_73_73	AD	76	M	E3/E3	391	571	66	1.14433	1.42721		1.36027	1.71015	1.05707	1.64358	0.666947	3.06325	2.82741	4.81564	0.443934	0.788464	0.47402	0.652254	0.894903	0.629577	0.498909	0.80255	1.19292	0.861723	0.84769	0.994708	0.819316	0.606601	0.581042	0.365226	1.54877	2.15885	0.998604	0.708253	1.08634	0.881954	0.631656	3.869	0.987059	0.0548225	1.07599	1.47528	0.807846	0.088962	1.04466
LB131-10_170628_Pl1_1_79_63	AD	67	F	E3/E4	234	304	116	1.4145	1.46		1.86854	2.34749	1.068	2.26634	0.846348	3.46206	3.57514	5.93157	0.633569	1.1248	0.726175	1.54336	1.53808	1.11765	0.747504	1.29794	1.28597	1.40052	1.26582	1.17684	1.21432	1.64895	2.5234	1.22364	1.4495	1.93947	1.95353	1.42969	1.57138	0.915534	1.10438	5.46937	1.5251	0.0798433	1.58412	1.33496	0.497896	0.117551	1.38903
LB131-10_170825_Pl2_1_7_40	AD	67	M	E3/E4	371	881	110	1.04515	1.50484		1.76318	2.24989	1.23272	2.27583	0.781073	4.03125	5.42926	7.02042	0.66739	1.06192	0.651857	1.09355	2.1022	0.761389	0.966553	1.0774	1.34839	1.12048	1.05667	0.954924	1.01573	1.31555	1.71661	0.930134	1.11331	1.61406	3.73144	1.74118	1.39186	1.94379	0.82548	5.82358	1.36279	0.0572049	2.01374	1.0578	0.555104	0.223437	1.49177
LB131-10_170825_Pl2_1_12_38	AD	77	F	E4/E4	215	837	94	1.13996	1.25225		2.05294	3.09404	1.15094	1.44365	0.652082	2.43853	3.28665	4.40911	0.73329	1.00364	0.601634	1.43415	1.98927	0.804688	0.912857	1.05079	1.3541	1.08617	1.34666	1.10869	0.974085	1.58354	1.91855	0.988339	1.09752	1.76821	2.98477	1.80179	2.03552	1.73794	1.14077	7.60291	1.69579	0.0791982	2.36912	1.13511	0.683595	0.169615	1.36727
LB131-10_170825_Pl2_1_11_32	AD	72	M	E3/E4	421	530	68	0.853164	1.24696		1.47533	1.87658	0.999353	0.896014	0.392788	1.5495	1.74461	2.48492	0.506008	0.893047	0.465648	1.62106	1.67698	0.963953	0.573225	0.829364	1.16848	1.02693	1.27451	1.13289	0.920765	1.77469	2.85242	1.11001	0.808067	1.15531	2.00248	1.50628	1.46929	1.21402	0.994653	4.5848	1.16589	0.0649252	1.45204	0.709184	0.414479	0.147369	1.54574
LB131-10_170628_Pl1_1_87_12	AD	59	F	E3/E3	191	420	55	0.64343	0.651449		1.06509	1.11498	1.00958	1.27047	0.515405	2.23475	1.98881	3.66862	0.339927	0.789215	0.435428	1.00723	1.27278	0.978898	0.451	0.819953	0.955464	0.858382	0.861573	0.878995	0.722172	1.11607	1.33856	0.531279	0.728528	1.15811	1.27378	1.04896	0.919087	0.95032	0.655676	2.77124	0.825997	0.0473435	0.870545	0.376755	0.194054	0.100452	1.23239
LB131-10_170825_Pl2_1_3_21	AD	84	F	E3/E4	341	572	73	0.950342	1.1512		1.13762	1.05778	0.898224	3.29792	1.23363	5.07018	4.93542	7.33259	0.521307	0.88209	0.606792	1.04126	1.13583	0.818648	0.614424	1.05886	1.1675	1.11003	1.02818	1.3922	1.11008	0.560839	0.881068	0.43081	0.931418	1.25434	1.2402	0.955476	1.18311	1.17995	0.90782	3.05063	1.01796	0.0422622	1.01784	0.871829	0.625678	0.130813	1.52197
LB131-10_170628_Pl1_1_40_53	AD	66	M	-	401	742	69	0.665721	0.826287		1.25558	1.6244	1.02188	1.74545	0.643151	3.07478	2.71573	4.64473	0.381411	0.808084	0.443183	1.04983	1.34726	1.14026	0.497167	0.952777	1.15281	1.03857	1.12658	0.996548	0.868132	1.52024	1.85898	1.08751	0.885859	1.26661	1.51815	1.07736	1.22257	0.655242	0.931755	3.47627	0.984604	0.0586669	1.0956	0.663226	0.311129	0.0797714	0.976339
LB131-10_170628_Pl1_1_84_11	AD	78	F	E3/E4	441	1167	129	1.59127	1.60945		1.52931	1.91466	1.03673	1.58676	0.718928	2.78578	2.77499	4.96415	0.445767	0.846051	0.460108	0.859712	0.955405	0.731632	0.593211	0.935009	1.2247	1.23826	1.16755	1.29771	1.05782	0.981835	1.24684	0.638931	1.46347	2.11832	1.30936	1.19002	1.33304	1.58342	1.09231	4.31508	1.38202	0.0644698	1.4398	0.991944	0.609536	0.0887953	1.10442
LB131-10_170628_Pl1_1_82_32	AD	73	F	E4/E4	372	773	75	1.59259	1.69466		1.48474	2.01889	1.16693	1.241	0.55184	2.9937	2.80466	4.60036	0.75596	1.22309	0.708638	1.41657	1.49373	1.1894	0.744683	1.24326	1.38792	1.64715	1.27363	0.959221	1.07495	1.47839	1.53679	0.789568	1.48496	2.05013	1.82388	1.19634	1.16683	1.19472	1.1179	5.31908	1.44671	0.0563176	1.52755	0.742301	0.405169	0.0936207	1.15953
LB131-10_170628_Pl1_1_67_39	AD	74	F	E3/E3	533	1140	117	1.94002	2.76306		1.90781	2.23883	1.28657	1.60901	0.64223	3.42978	3.93743	5.8351	0.764508	0.957338	0.86164	1.47022	1.67707	0.910243	0.975395	1.38342	2.13166	1.92071	1.75435	1.06511	1.18746	1.81098	3.18185	1.74095	1.77646	2.23931	2.28448	1.88745	1.51159	2.52069	1.68935	6.68982	2.14405	0.0640924	2.01978	0.871576	0.474919	0.189127	2.25812
LB131-10_170825_Pl2_1_47_62	AD	72	F	E4/E4	311	656	63	0.664567	1.00496		1.17811	1.55926	0.85333	2.18082	0.804215	3.35777	3.49988	5.36311	0.410484	0.742375	0.46159	1.09539	1.31	0.903628	0.460856	0.900044	0.991563	1.02259	0.99036	1.00184	0.939212	1.07496	1.31194	0.76141	0.743241	1.11172	1.43901	0.913551	1.09204	1.03417	0.841801	2.62472	0.77355	0.0396265	0.864164	0.885644	0.390859	0.042794	0.548943
LB131-10_170825_Pl2_1_89_12	AD	76	F	E3/E3	483	571	68	0.906842	0.971044		1.41681	1.80487	0.888693	1.3032	0.540018	2.15922	2.05534	3.0469	0.557392	1.01127	0.633926	1.09413	1.41437	0.983866	0.804652	1.29052	1.47841	1.56133	1.29921	1.21988	0.995809	1.61552	2.221	1.39089	0.974284	1.49614	1.79855	1.255	1.41496	1.27392	0.974875	3.44169	1.01544	0.0450718	1.06463	0.800674	0.479399	0.113611	1.33961
LB131-10_170825_Pl2_1_24_31	AD	66	F	E4/E4	354	702	80	1.04264	1.24038		2.03269	2.63102	0.967862	0.915615	0.350673	1.51474	1.57677	2.49503	0.623241	0.945993	0.588545	1.3146	1.98198	1.04007	0.573416	0.912205	1.06487	0.851826	1.23302	0.966285	0.890973	1.52017	1.72535	0.908108	0.867329	1.15039	1.89688	1.32497	1.15626	1.06088	0.898131	4.04688	1.06164	0.0599497	1.23367	0.509741	0.304337	0.103606	1.06598
LB131-10_170628_Pl1_1_2_42	AD	71	M	E3/E4	258	463	52	0.533879	0.564938		1.19356	0.971022	1.0358	2.38512	0.80282	3.46071	3.57813	5.73093	0.488414	0.739223	0.452433	1.18358	1.3083	1.04005	0.614756	0.955115	1.20625	1.16567	0.782224	1.06149	0.812569	0.541005	0.863786	0.46963	0.772141	1.04233	1.25508	1.06178	1.26678	1.20039	0.728549	2.83913	0.949651	0.0420878	0.82552	1.35926	0.589493	0.0395874	0.48417
LB131-10_170825_Pl2_1_26_64	AD	53	F	E3/E3	329	884	90	0.777482	1.00637		1.40256	1.93976	0.846045	0.978304	0.386634	1.49668	1.6172	2.47224	0.442555	0.820213	0.534521	0.766864	1.34376	0.853468	0.476474	0.859685	0.872095	0.954474	0.926762	0.892955	0.836771	0.987935	1.86578	0.731041	0.747585	1.12417	1.34239	0.876226	0.992697	1.30326	0.649253	2.75505	0.795314	0.0390653	0.897402	0.580495	0.287203	0.108969	1.33399
LB131-10_170628_Pl1_1_93_60	AD	82	M	E3/E3	298	752	92	1.24391	1.4189		1.69149	2.09956	1.02873	2.24745	0.920337	3.95	3.6997	6.2858	0.579514	1.28364	0.710166	1.2898	1.4573	1.17304	0.893189	1.71556	1.71243	1.65158	1.36334	1.10764	1.01102	1.47121	1.52752	1.46738	1.48797	2.12246	2.00654	1.36042	1.82073	2.01055	1.38584	5.6554	1.56796	0.0980938	1.69112	1.68708	0.773212	0.135195	1.6406
LB131-10_170628_Pl1_1_86_58	AD	84	M	E3/E3	509	1237	136	2.01953	2.42388		2.64373	3.62696	1.05425	4.96781	2.43391	10.8859	9.101	16.4274	0.752125	2.07005	1.06551	0.656109	1.39573	1.01295	0.891235	1.54345	2.12109	2.00696	2.10795	2.20892	1.79222	2.25964	3.98146	1.29484	2.6439	3.96772	2.36466	1.36297	2.74374	3.90954	2.2261	8.86542	3.28633	0.133465	2.48317	1.94546	1.02237	0.195326	2.37483
LB131-10_170825_Pl2_1_69_10	AD	73	F	E3/E4	250	1013	108	1.48817	1.8342		1.50509	1.4448	0.891897	2.28871	0.956565	4.08367	3.81096	5.76546	0.578613	1.27216	0.730004	1.1121	1.40429	0.893392	0.493385	0.728098	0.948563	0.747844	1.03116	1.02258	0.80892	0.738675	0.925162	0.439603	1.20975	1.94297	1.76508	1.271	1.46347	1.28491	1.10401	4.04087	1.1414	0.0591682	1.26309	1.44567	1.0071	0.0973706	1.06822
LB131-10_170825_Pl2_1_63_11	AD	74	M	E4/E4	286	484	50	0.648897	0.827584		1.22904	1.56007	0.876057	1.35163	0.554682	2.14077	2.20589	3.23625	0.501645	0.727744	0.495917	1.23845	1.35362	1.03169	0.60171	1.04785	1.18408	1.03398	1.05033	0.912223	0.820187	1.37862	1.92373	0.871958	0.579951	0.79046	1.44106	1.19806	1.02939	1.08914	0.774032	2.89	0.834131	0.0372242	0.85064	0.612012	0.375683	0.109554	1.2123
LB131-10_170628_Pl1_1_43_68	AD	81	F	E3/E4	486	696	85	1.24331	1.28365		2.07907	3.005	1.10078	2.26537	0.855708	3.64059	3.76538	5.30704	0.703487	1.19255	0.774837	1.49299	1.48966	1.11534	0.557889	1.05643	1.16109	1.12773	1.33053	1.17005	1.03363	1.84043	4.36924	1.61321	1.37145	1.78213	2.50627	1.56745	1.7978	1.31917	1.15764	4.97158	1.52441	0.068285	1.54232	0.715312	0.304125	0.0328835	0.422501
LB131-10_170628_Pl1_1_20_16	AD	76	F	E3/E4	414	703	76	0.978061	1.03643		1.92054	2.54825	1.01378	1.4766	0.599389	2.36995	2.24741	3.86833	0.490878	0.765341	0.490256	1.39723	1.43759	1.09768	0.510487	0.886578	0.954285	1.02759	1.46845	1.05652	1.01086	1.78062	2.01999	1.19078	0.990428	1.61481	1.64625	1.34651	1.46956	1.18259	1.10746	3.69541	1.21149	0.0613813	1.24951	0.841189	0.401389	0.10781	1.37373
LB131-10_170628_Pl1_1_14_50	AD	80	F	E3/E4	481	508	59	0.754068	0.872728		1.32979	1.6645	1.01186	2.09938	0.856151	3.55228	3.4682	5.00438	0.600395	1.09834	0.624335	0.574406	0.990288	0.937173	0.68619	1.23104	1.43562	1.66174	1.37632	0.65209	0.595324	1.59803	2.89211	0.974918	1.12653	1.54129	1.57919	1.06004	1.42102	1.46421	1.05353	3.60865	1.03143	0.0508461	0.987331	1.39664	0.724176	0.0987409	1.19044
LB131-10_170825_Pl2_1_4_48	AD	83	M	E3/E4	344	550	64	0.805049	1.16048		1.1427	1.30049	0.862116	5.26368	1.89145	5.78973	7.41115	10.7896	0.530072	0.871458	0.668494	0.845283	0.935514	0.806045	0.725581	1.33391	1.27541	1.29151	1.12114	1.29608	1.12784	1.26808	2.2291	1.13253	1.10204	1.61194	1.55026	1.18116	1.60299	1.69293	1.27367	3.34094	1.1097	0.0503143	1.02249	2.23396	1.14108	0.135968	1.71813
LB131-10_170628_Pl1_1_38_54	AD	77	F	E3/E4	401	603	65	0.929829	1.00573		1.30333	1.75809	1.01263	2.14895	0.852147	3.79407	3.49609	5.78648	0.483874	0.877276	0.548784	0.886326	1.31993	0.955763	0.525206	0.90095	1.09657	0.88638	0.960349	0.810682	0.673172	1.46153	1.59732	0.719112	1.19682	1.5629	1.21405	0.77592	1.05334	1.0016	0.746095	4.24671	1.15967	0.0685335	1.2283	0.739858	0.390623	0.0749241	0.856754
LB131-10_170825_Pl2_1_45_60	AD	73	F	E3/E4	531	820	84	0.839431	1.15605		1.4441	2.00624	0.771394	2.08954	0.762126	3.50263	3.06127	4.42096	0.603588	1.4418	0.79702	1.25479	1.78501	1.02628	0.656483	1.09726	1.2524	1.06257	1.19031	0.984781	0.94866	1.40698	1.60374	0.929454	1.31612	1.93809	1.61085	0.922975	1.42396	1.34888	1.00495	3.72075	1.39227	0.0596839	1.10167	0.767699	0.455286	0.0344012	0.456083
LB131-10_170628_Pl1_1_21_69	AD	79	F	E3/E4	202	435	53	0.684793	0.544986		1.2105	1.45022	1.11308	1.7808	0.648962	2.75914	2.59179	4.3311	0.583265	0.957279	0.611583	0.886042	1.47986	0.988007	0.548706	0.897514	0.882077	1.02811	0.991619	0.938206	1.06173	2.81595	1.75077	0.7884	1.11461	1.60157	1.47937	1.19035	1.34913	1.61004	0.840185	3.12705	1.04052	0.0491302	0.983835	7.41352	3.40519	0.0918148	1.09376
LB131-10_170825_Pl2_1_32_52	AD	70	F	E3/E4	406	448	55	0.704764	0.871199		1.24822	1.86266	0.851804	1.57096	0.614881	2.30825	2.41821	3.34389	0.352773	0.765735	0.522619	0.386921	0.916831	0.711352	0.412413	0.770038	0.819065	0.68537	1.10004	0.957658	0.87759	1.10941	2.14827	0.936444	0.780941	1.21823	1.20768	1.00306	1.16547	1.39033	0.881841	2.53664	0.802151	0.0433767	0.835349	0.690359	0.356382	0.0830411	0.950723
LB131-10_170628_Pl1_1_22_57	AD	68	F	E3/E4	329	599	66	0.745829	0.741303		1.33259	1.74187	1.00402	1.29	0.523515	1.99679	2.11717	3.26527	0.490197	0.900939	0.574194	1.1595	1.43611	1.28241	0.513312	0.951245	1.07357	0.99418	1.13309	0.792214	0.869011	1.41388	1.44329	0.706119	0.910757	1.20133	1.15072	0.872027	1.07611	1.12564	0.754539	2.90019	0.798613	0.0509573	0.848878	0.657119	0.324412	0.0767954	0.892362
LB131-10_170825_Pl2_1_34_19	AD	67	F	E4/E4	281	498	59	0.715412	0.8624		1.01113	1.25774	1.01733	1.03387	0.396536	1.63028	1.5487	2.31446	0.463007	0.850224	0.574008	0.916297	1.14834	0.785678	0.50362	0.769328	1.04548	0.813733	0.87351	0.791267	0.756686	1.03248	1.36701	0.526067	0.714494	1.06031	1.41956	1.03365	0.852994	0.883873	0.68677	3.05984	0.849136	0.0428711	0.943966	0.628987	0.353459	0.108194	1.1467
LB131-10_170628_Pl1_1_85_47	AD	62	F	E3/E3	528	1232	121	1.20832	1.45024		1.85959	2.30425	1.09927	0.785563	0.278531	1.14475	1.21465	2.08535	0.598878	1.02778	0.64772	0.696157	1.52967	1.14599	0.77612	1.22212	1.54214	1.5651	1.36038	1.0675	1.01553	1.63843	2.27555	1.35605	1.33645	1.89366	1.98682	1.58816	1.56205	1.6302	1.07388	4.49575	1.39642	0.0612994	1.52171	0.603334	0.243738	0.134778	1.53564
LB131-10_170825_Pl2_1_90_55	AD	66	F	E4/E4	314	794	86	1.02241	1.37728		2.05351	2.41179	0.81844	2.1286	0.779107	3.51521	3.21415	4.64207	0.612228	1.13974	0.703641	1.54698	1.62833	1.11015	0.814823	1.39147	1.61563	1.47424	1.49878	1.16949	1.41155	1.4143	1.77983	1.05818	1.12262	1.73135	1.97436	1.18863	1.76463	2.5901	1.58361	5.10147	1.69607	0.0665451	1.37982	0.729651	0.300118	0.108695	1.30094
LB131-10_170825_Pl2_2_6_27	PD	68	F	-	566	322	41	0.781484	1.04621		2.16539	2.73861	0.913515	0.825692	0.332322	1.35179	1.38575	2.10716	0.567827	0.945228	0.556281	1.28483	1.58445	1.02291	0.543243	0.884733	1.1216	0.942855	1.35411	1.38987	1.09299	1.99107	2.61221	1.19767	0.715185	1.07624	1.98174	1.35406	1.82893	1.84945	1.2369	4.94706	1.41008	0.0776827	1.58579	0.518985	0.292614	0.138381	1.56948
LB131-10_170628_Pl1_2_10_51	PD	63	F	-	934	291	50	0.838072	0.990627		1.67836	2.48932	0.98062	0.526036	0.197552	0.768235	0.802379	1.31809	0.467273	0.62284	0.425445	1.14635	1.27207	0.906613	0.435664	0.81201	0.907438	0.830442	1.26018	0.973602	1.04102	1.67692	2.61175	1.33142	0.747312	1.08725	1.6114	1.14032	1.45459	1.30974	0.935487	4.65112	1.11938	0.0765008	1.3066	0.738488	0.330466	0.0483305	0.569783
LB131-10_170825_Pl2_2_14_47	PD	71	F	-	1090	265	37	0.667987	0.820567		1.57396	2.08811	0.800678	2.84722	1.53345	3.38446	3.75197	5.52042	0.58003	1.06024	0.627974	1.09622	1.52451	0.965491	0.453916	0.874482	0.900873	0.895244	1.19258	1.49227	1.34847	1.46203	1.94637	0.872871	0.748936	1.04403	1.93968	1.28083	1.38752	1.51089	0.890169	2.90927	1.02663	0.0503428	0.933732	0.905267	0.329309	0.0887259	1.04916
LB131-10_170628_Pl1_2_18_13	PD	68	F	-	380	371	48	0.636292	0.788795		1.13983	1.48395	0.989048	1.2835	0.465413	2.07866	1.87139	3.17478	0.513739	0.896591	0.5352	0.434596	1.01995	0.90618	0.429105	0.743912	0.839237	0.807344	0.961553	0.962161	0.868047	1.14866	1.55983	0.848042	0.851554	1.26542	1.33743	1.06121	0.969057	1.17541	0.788163	3.16254	0.891027	0.0478585	0.927925	0.503821	0.307625	0.0469003	0.567287
LB131-10_170825_Pl2_2_22_45	PD	69	M	-	774	177	26	0.4573	0.42336		0.949932	1.38917	0.843637	1.49251	0.557358	2.49771	2.35246	3.81069	0.362978	0.745984	0.321424	0.842468	1.19111	0.777927	0.377931	0.700851	0.714683	0.620662	0.648489	0.61827	0.621452	0.736793	1.24797	0.276006	0.585992	0.803844	0.984078	0.738181	0.829613	0.526479	0.436822	2.34696	0.717634	0.030325	0.738964	0.509652	0.271442	0.0883998	0.961326
LB131-10_170628_Pl1_2_30_40	PD	64	M	-	909	194	45	0.786669	0.929136		1.738	2.35099	1.00906	0.773956	0.31475	1.12572	1.28113	2.09371	0.432408	0.789404	0.510415	1.22319	1.40192	0.97821	0.494655	0.82661	0.876452	0.970055	1.2018	1.11624	0.903981	1.70512	2.53589	1.48179	0.868587	1.31062	1.29385	1.1378	1.53804	1.28788	1.0388	4.69817	1.28383	0.0732414	1.47927	0.613037	0.266993	0.131615	1.49636
LB131-10_170825_Pl2_2_34_61	PD	68	F	-	711	216	33	0.514064	0.646072		1.55005	1.89123	0.866732	1.90321	0.695194	2.72255	3.00997	4.32883	0.403063	0.6565	0.508332	1.13552	1.47006	1.00378	0.454675	0.915665	0.895744	0.873628	1.03821	1.02759	1.09573	1.81772	2.71498	1.46208	0.746319	1.00356	1.61159	1.15791	1.16374	0.997896	0.799064	2.58829	0.760366	0.0387239	0.795984	0.829268	0.36943	0.103274	1.22862
LB131-10_170628_Pl1_2_38_22	PD	79	M	-	515	34	20	0.367101	0.426866		0.661875	0.787218	1.01384	1.61431	0.668142	2.71211	2.90865	4.41699	0.466275	0.651446	0.384819	0.80561	1.03101	0.803227	0.315359	0.709835	0.764085	0.935635	0.828646	0.931595	0.817163	0.728563	0.845333	0.269829	0.58563	0.765746	1.2428	0.886464	0.790847	0.593472	0.449386	1.73378	0.548064	0.0301575	0.476307	0.78192	0.426047	0.0643117	0.876603
LB131-10_170825_Pl2_2_42_18	PD	69	M	-	663	158	35	0.586519	0.667644		1.03627	1.21932	0.897864	1.78259	0.679687	2.67891	2.87963	4.50346	0.576384	0.878051	0.599329	1.1028	1.55967	1.03065	0.629501	1.04119	1.27	1.21974	1.04326	1.0732	0.841678	1.51733	1.49174	1.01176	0.674975	0.97602	1.49252	1.02474	1.20527	0.959551	0.577917	2.83567	0.9142	0.0372071	0.678059	0.798694	0.500609	0.110888	1.25503
LB131-10_170825_Pl2_2_50_34	PD	80	M	-	375	171	33	0.460911	0.521077		0.863496	1.09691	1.0702	1.60243	0.652292	2.6672	3.1112	4.62636	0.518151	0.8599	0.463431	1.19694	1.61983	0.804481	0.552908	0.762177	0.963983	0.811582	0.847433	1.01055	0.774099	1.15149	1.07571	0.79452	0.644708	0.880469	1.65142	1.14352	0.929281	0.853345	0.591186	2.79373	0.744089	0.03245	0.831554	0.555377	0.376333	0.103476	1.01922
LB131-10_170825_Pl2_2_54_5	PD	76	F	-	427	358	47	0.628784	0.759729		1.59033	2.04098	0.912596	0.914043	0.431381	1.32676	1.462	2.16648	0.515136	0.697905	0.542134	1.05991	1.38151	0.897325	0.513068	0.965001	1.15406	0.999193	1.20766	1.13761	1.1132	1.52195	2.17664	1.00891	0.599361	0.815645	1.63016	1.01988	1.28343	0.958226	0.86295	3.633	1.02566	0.0576297	1.11147	0.802541	0.493949	0.0545752	0.588964
aPeptide measurements show the area ratio of tryptic to stable isotope-labeled peptide (L/H).
[truncated: 9 more columns]
