# Supplementary material for: Endo-lysosomal proteins and ubiquitin CSF concentrations in Alzheimer’s and Parkinson’s disease
Source: Alzheimers Res Ther. 2019 Sep 14;11:82. doi: 10.1186/s13195-019-0533-9 (PMC6745076; doi:10.1186/s13195-019-0533-9)
Supplement: Supplementary file 7 — Table S4. Spearman’s correlation analysis. (XLS 1583 kb) [file 13195_2019_533_MOESM7_ESM.xls]

## Sheet: Pilot Study AD
Table S4. Spearman's correlation in the AD group of the Pilot Study (N = 19).
Variable	by Variable	Spearman ρ	Prob>|ρ|	Correlation (True = 1, False = 0)
AP2B1_835-842	AP2B1_712-719	0.9158	<.0001	1
APP_439-450	APP_289-301	0.9386	<.0001	1
C9_186-194	C9_146-154	0.9526	<.0001	1
C9_232-242	C9_146-154	0.9316	<.0001	1
C9_232-242	C9_186-194	0.914	<.0001	1
C9_473-483	C9_146-154	0.9	<.0001	1
C9_473-483	C9_186-194	0.8719	<.0001	1
C9_473-483	C9_232-242	0.9544	<.0001	1
C9_497-508	C9_146-154	0.9316	<.0001	1
C9_497-508	C9_186-194	0.8667	<.0001	1
C9_497-508	C9_232-242	0.9526	<.0001	1
C9_497-508	C9_473-483	0.9596	<.0001	1
CTSB_210-220	CTSB_58-71	0.8053	<.0001	1
CTSD_112-122	CTSD_55-72	0.9421	<.0001	1
CTSD_349-357	CTSD_55-72	0.893	<.0001	1
CTSD_349-357	CTSD_112-122	0.8579	<.0001	1
CatF_103-116	BSA_421-433	0.8807	<.0001	1
CatF_236-245	CatF_103-116	0.8947	<.0001	1
CatF_266-278	BSA_421-433	0.8561	<.0001	1
CatF_266-278	CTSD_112-122	0.8807	<.0001	1
CatF_266-278	CatF_103-116	0.9316	<.0001	1
CatF_266-278	CatF_236-245	0.8053	<.0001	1
CatF_442-450	BSA_421-433	0.8421	<.0001	1
CatF_442-450	CatF_103-116	0.9368	<.0001	1
CatF_442-450	CatF_236-245	0.8088	<.0001	1
CatF_442-450	CatF_266-278	0.8544	<.0001	1
CTSL_105-116	CTSD_55-72	0.9386	<.0001	1
CTSL_105-116	CTSD_112-122	0.893	<.0001	1
CTSL_105-116	CTSD_349-357	0.8561	<.0001	1
DPP7_40-47	CTSD_55-72	0.8491	<.0001	1
DPP7_40-47	CTSL_105-116	0.9	<.0001	1
DPP7_113-123	DPP7_40-47	0.8561	<.0001	1
DPP7_449-462	CTSD_55-72	0.8316	<.0001	1
DPP7_449-462	CTSD_112-122	0.8105	<.0001	1
DPP7_449-462	CTSL_105-116	0.8596	<.0001	1
DPP7_449-462	DPP7_40-47	0.9368	<.0001	1
DPP7_449-462	DPP7_113-123	0.8702	<.0001	1
HEXB_391-400	CTSD_55-72	0.8316	<.0001	1
HEXB_391-400	CTSL_105-116	0.8789	<.0001	1
HEXB_391-400	DPP7_40-47	0.9	<.0001	1
HEXB_391-400	DPP7_449-462	0.8088	<.0001	1
HEXB_391-400	HEXB_285-300	0.8105	<.0001	1
LAMP1_138-146	AP2B1_868-878	-0.8929	0.0068	1
LAMP1_357-363	LAMP1_327-337	0.8246	<.0001	1
LAMP2_281-289	LAMP2_133-144	0.8895	<.0001	1
LYZ_69-80	LYZ_52-59	0.8368	<.0001	1
FUCA1_163-173	FUCA1_114-130	0.9895	<.0001	1
FUCA1_344-354	FUCA1_114-130	0.9386	<.0001	1
FUCA1_344-354	FUCA1_163-173	0.9386	<.0001	1
TCN2_300-313	TCN2_45-59	0.8632	<.0001	1
TPP1_61-78	CTSD_55-72	0.9053	<.0001	1
TPP1_61-78	CTSD_112-122	0.8807	<.0001	1
TPP1_61-78	CTSD_349-357	0.8263	<.0001	1
TPP1_61-78	CTSL_105-116	0.914	<.0001	1
TPP1_61-78	DPP7_40-47	0.8842	<.0001	1
TPP1_61-78	DPP7_113-123	0.8193	<.0001	1
TPP1_61-78	DPP7_449-462	0.9193	<.0001	1
TPP1_61-78	HEXB_391-400	0.8684	<.0001	1
TPP1_246-259	CTSD_55-72	0.9333	<.0001	1
TPP1_246-259	CTSD_112-122	0.9175	<.0001	1
TPP1_246-259	CTSD_349-357	0.8649	<.0001	1
TPP1_246-259	CTSL_105-116	0.8947	<.0001	1
TPP1_246-259	DPP7_40-47	0.8561	<.0001	1
TPP1_246-259	DPP7_449-462	0.8035	<.0001	1
TPP1_246-259	HEXB_391-400	0.8298	<.0001	1
TPP1_246-259	TPP1_61-78	0.8456	<.0001	1
TPP1_507-520	CTSD_55-72	0.9404	<.0001	1
TPP1_507-520	CTSD_112-122	0.9333	<.0001	1
TPP1_507-520	CTSD_349-357	0.8421	<.0001	1
TPP1_507-520	CatF_266-278	0.807	<.0001	1
TPP1_507-520	CTSL_105-116	0.9386	<.0001	1
TPP1_507-520	CTSZ_261-270	0.8632	<.0001	1
TPP1_507-520	DPP7_40-47	0.8561	<.0001	1
TPP1_507-520	DPP7_449-462	0.8596	<.0001	1
TPP1_507-520	HEXB_391-400	0.8684	<.0001	1
TPP1_507-520	TPP1_61-78	0.9421	<.0001	1
TPP1_507-520	TPP1_246-259	0.907	<.0001	1
Ubiquitin_12-27	AP2B1_712-719	0.8211	<.0001	1
Ubiquitin_12-27	BSA_421-433	0.8386	<.0001	1
Ubiquitin_64-72	Ubiquitin_12-27	0.9175	<.0001	1
T-tau (ng/L)	Age	0.0458	0.8523	0
Aβ1-42 (ng/L)	Age	0.2705	0.2627	0
Aβ1-42 (ng/L)	T-tau (ng/L)	-0.1336	0.5857	0
P-tau (ng/L)	Age	0.2894	0.2295	0
P-tau (ng/L)	T-tau (ng/L)	0.7251	0.0004	0
P-tau (ng/L)	Aβ1-42 (ng/L)	-0.0989	0.6872	0
AP2B1_712-719	Age	0.162	0.5077	0
AP2B1_712-719	T-tau (ng/L)	0.2318	0.3397	0
AP2B1_712-719	Aβ1-42 (ng/L)	-0.1607	0.5111	0
AP2B1_712-719	P-tau (ng/L)	0.4162	0.0763	0
AP2B1_835-842	Age	0.1294	0.5975	0
AP2B1_835-842	T-tau (ng/L)	0.223	0.3588	0
AP2B1_835-842	Aβ1-42 (ng/L)	-0.1879	0.4411	0
AP2B1_835-842	P-tau (ng/L)	0.4074	0.0834	0
AP2B1_868-878	Age	-0.7456	0.0544	0
AP2B1_868-878	T-tau (ng/L)	0.5714	0.1802	0
AP2B1_868-878	Aβ1-42 (ng/L)	-0.1429	0.7599	0
AP2B1_868-878	P-tau (ng/L)	0	1	0
AP2B1_868-878	AP2B1_712-719	-0.1786	0.7017	0
AP2B1_868-878	AP2B1_835-842	-0.0714	0.879	0
APP_289-301	Age	0.3732	0.1155	0
APP_289-301	T-tau (ng/L)	0.0053	0.9829	0
APP_289-301	Aβ1-42 (ng/L)	0.0729	0.7669	0
APP_289-301	P-tau (ng/L)	0.3422	0.1516	0
APP_289-301	AP2B1_712-719	0.6509	0.0025	0
APP_289-301	AP2B1_835-842	0.5737	0.0102	0
APP_289-301	AP2B1_868-878	-0.1786	0.7017	0
APP_439-450	Age	0.3301	0.1675	0
APP_439-450	T-tau (ng/L)	-0.0299	0.9034	0
APP_439-450	Aβ1-42 (ng/L)	-0.0272	0.9119	0
APP_439-450	P-tau (ng/L)	0.3616	0.1283	0
APP_439-450	AP2B1_712-719	0.6702	0.0017	0
APP_439-450	AP2B1_835-842	0.6632	0.002	0
APP_439-450	AP2B1_868-878	0.1071	0.8192	0
BSA_421-433	Age	0.2474	0.3073	0
BSA_421-433	T-tau (ng/L)	-0.2256	0.353	0
BSA_421-433	Aβ1-42 (ng/L)	-0.1282	0.601	0
BSA_421-433	P-tau (ng/L)	0.1155	0.6377	0
BSA_421-433	AP2B1_712-719	0.6421	0.003	0
BSA_421-433	AP2B1_835-842	0.6456	0.0028	0
BSA_421-433	AP2B1_868-878	0	1	0
BSA_421-433	APP_289-301	0.3281	0.1703	0
BSA_421-433	APP_439-450	0.4123	0.0794	0
C9_146-154	Age	0.3266	0.1724	0
C9_146-154	T-tau (ng/L)	-0.1378	0.5736	0
C9_146-154	Aβ1-42 (ng/L)	-0.1097	0.6547	0
C9_146-154	P-tau (ng/L)	-0.1631	0.5046	0
C9_146-154	AP2B1_712-719	0.4316	0.065	0
C9_146-154	AP2B1_835-842	0.4737	0.0405	0
C9_146-154	AP2B1_868-878	-0.4286	0.3374	0
C9_146-154	APP_289-301	0.0807	0.7426	0
C9_146-154	APP_439-450	0.1333	0.5863	0
C9_146-154	BSA_421-433	0.3649	0.1245	0
C9_186-194	Age	0.2764	0.252	0
C9_186-194	T-tau (ng/L)	0.0018	0.9943	0
C9_186-194	Aβ1-42 (ng/L)	-0.1124	0.6469	0
C9_186-194	P-tau (ng/L)	-0.1102	0.6533	0
C9_186-194	AP2B1_712-719	0.3965	0.0928	0
C9_186-194	AP2B1_835-842	0.4579	0.0487	0
C9_186-194	AP2B1_868-878	-0.5	0.2532	0
C9_186-194	APP_289-301	0.0737	0.7643	0
C9_186-194	APP_439-450	0.1158	0.6369	0
C9_186-194	BSA_421-433	0.186	0.4459	0
C9_232-242	Age	0.3239	0.1761	0
C9_232-242	T-tau (ng/L)	-0.0202	0.9346	0
C9_232-242	Aβ1-42 (ng/L)	-0.1536	0.53	0
C9_232-242	P-tau (ng/L)	-0.0556	0.8213	0
C9_232-242	AP2B1_712-719	0.4632	0.0458	0
C9_232-242	AP2B1_835-842	0.5895	0.0079	0
C9_232-242	AP2B1_868-878	-0.3571	0.4316	0
C9_232-242	APP_289-301	0.0614	0.8028	0
C9_232-242	APP_439-450	0.1351	0.5814	0
C9_232-242	BSA_421-433	0.4316	0.065	0
C9_473-483	Age	0.3046	0.2048	0
C9_473-483	T-tau (ng/L)	-0.0413	0.8668	0
C9_473-483	Aβ1-42 (ng/L)	-0.259	0.2843	0
C9_473-483	P-tau (ng/L)	0.0123	0.96	0
C9_473-483	AP2B1_712-719	0.5298	0.0196	0
C9_473-483	AP2B1_835-842	0.6351	0.0035	0
C9_473-483	AP2B1_868-878	-0.3571	0.4316	0
C9_473-483	APP_289-301	0.1386	0.5715	0
C9_473-483	APP_439-450	0.2193	0.367	0
C9_473-483	BSA_421-433	0.5228	0.0216	0
C9_497-508	Age	0.338	0.1569	0
C9_497-508	T-tau (ng/L)	-0.1352	0.581	0
C9_497-508	Aβ1-42 (ng/L)	-0.2291	0.3453	0
C9_497-508	P-tau (ng/L)	-0.1252	0.6095	0
C9_497-508	AP2B1_712-719	0.4421	0.0581	0
C9_497-508	AP2B1_835-842	0.5474	0.0153	0
C9_497-508	AP2B1_868-878	-0.4643	0.2939	0
C9_497-508	APP_289-301	0.0474	0.8473	0
C9_497-508	APP_439-450	0.1263	0.6064	0
C9_497-508	BSA_421-433	0.5175	0.0232	0
CTSB_58-71	Age	0.3997	0.09	0
CTSB_58-71	T-tau (ng/L)	0.4109	0.0805	0
CTSB_58-71	Aβ1-42 (ng/L)	-0.1361	0.5786	0
CTSB_58-71	P-tau (ng/L)	0.2452	0.3117	0
CTSB_58-71	AP2B1_712-719	0.2035	0.4034	0
CTSB_58-71	AP2B1_835-842	0.3596	0.1304	0
CTSB_58-71	AP2B1_868-878	-0.4286	0.3374	0
CTSB_58-71	APP_289-301	0.1912	0.4329	0
CTSB_58-71	APP_439-450	0.1684	0.4907	0
CTSB_58-71	BSA_421-433	0.0298	0.9035	0
CTSB_58-71	C9_146-154	0.1404	0.5666	0
CTSB_58-71	C9_186-194	0.1561	0.5233	0
CTSB_58-71	C9_232-242	0.2754	0.2537	0
CTSB_58-71	C9_473-483	0.2298	0.3439	0
CTSB_58-71	C9_497-508	0.2825	0.2413	0
CTSB_80-87	Age	0.243	0.3162	0
CTSB_80-87	T-tau (ng/L)	0.3793	0.1093	0
CTSB_80-87	Aβ1-42 (ng/L)	-0.1879	0.4411	0
CTSB_80-87	P-tau (ng/L)	0.3201	0.1815	0
CTSB_80-87	AP2B1_712-719	0.3649	0.1245	0
CTSB_80-87	AP2B1_835-842	0.4281	0.0675	0
CTSB_80-87	AP2B1_868-878	-0.25	0.5887	0
CTSB_80-87	APP_289-301	0.2333	0.3364	0
CTSB_80-87	APP_439-450	0.2632	0.2764	0
CTSB_80-87	BSA_421-433	-0.0088	0.9716	0
CTSB_80-87	C9_146-154	0.2842	0.2383	0
CTSB_80-87	C9_186-194	0.2842	0.2383	0
CTSB_80-87	C9_232-242	0.3123	0.193	0
CTSB_80-87	C9_473-483	0.2035	0.4034	0
CTSB_80-87	C9_497-508	0.2912	0.2264	0
CTSB_80-87	CTSB_58-71	0.6982	0.0009	0
CTSB_210-220	Age	0.4137	0.0783	0
CTSB_210-220	T-tau (ng/L)	0.216	0.3745	0
CTSB_210-220	Aβ1-42 (ng/L)	-0.1071	0.6625	0
CTSB_210-220	P-tau (ng/L)	0.1358	0.5793	0
CTSB_210-220	AP2B1_712-719	0.3193	0.1827	0
CTSB_210-220	AP2B1_835-842	0.414	0.078	0
CTSB_210-220	AP2B1_868-878	-0.3571	0.4316	0
CTSB_210-220	APP_289-301	0.2632	0.2764	0
CTSB_210-220	APP_439-450	0.2632	0.2764	0
CTSB_210-220	BSA_421-433	0.0404	0.8697	0
CTSB_210-220	C9_146-154	0.4368	0.0615	0
CTSB_210-220	C9_186-194	0.4368	0.0615	0
CTSB_210-220	C9_232-242	0.4474	0.0548	0
CTSB_210-220	C9_473-483	0.3789	0.1096	0
CTSB_210-220	C9_497-508	0.4123	0.0794	0
CTSB_210-220	CTSB_80-87	0.7544	0.0002	0
CTSD_55-72	Age	0.2456	0.3108	0
CTSD_55-72	T-tau (ng/L)	0.0132	0.9573	0
CTSD_55-72	Aβ1-42 (ng/L)	0.0097	0.9687	0
CTSD_55-72	P-tau (ng/L)	0.1182	0.6299	0
CTSD_55-72	AP2B1_712-719	0.5246	0.0211	0
CTSD_55-72	AP2B1_835-842	0.6175	0.0048	0
CTSD_55-72	AP2B1_868-878	0.25	0.5887	0
CTSD_55-72	APP_289-301	0.4895	0.0334	0
CTSD_55-72	APP_439-450	0.4632	0.0458	0
CTSD_55-72	BSA_421-433	0.6123	0.0053	0
CTSD_55-72	C9_146-154	0.1895	0.4372	0
CTSD_55-72	C9_186-194	0.114	0.642	0
CTSD_55-72	C9_232-242	0.286	0.2353	0
CTSD_55-72	C9_473-483	0.3614	0.1284	0
CTSD_55-72	C9_497-508	0.314	0.1904	0
CTSD_55-72	CTSB_58-71	0.4632	0.0458	0
CTSD_55-72	CTSB_80-87	0.0351	0.8866	0
CTSD_55-72	CTSB_210-220	0.3596	0.1304	0
CTSD_112-122	Age	0.1664	0.496	0
CTSD_112-122	T-tau (ng/L)	-0.1089	0.6573	0
CTSD_112-122	Aβ1-42 (ng/L)	-0.1387	0.5711	0
CTSD_112-122	P-tau (ng/L)	-0.015	0.9514	0
CTSD_112-122	AP2B1_712-719	0.5526	0.0141	0
CTSD_112-122	AP2B1_835-842	0.6281	0.004	0
CTSD_112-122	AP2B1_868-878	0.25	0.5887	0
CTSD_112-122	APP_289-301	0.3842	0.1044	0
CTSD_112-122	APP_439-450	0.3789	0.1096	0
CTSD_112-122	BSA_421-433	0.7404	0.0003	0
CTSD_112-122	C9_146-154	0.2561	0.2898	0
CTSD_112-122	C9_186-194	0.1421	0.5617	0
CTSD_112-122	C9_232-242	0.3439	0.1494	0
CTSD_112-122	C9_473-483	0.407	0.0837	0
CTSD_112-122	C9_497-508	0.4035	0.0867	0
CTSD_112-122	CTSB_58-71	0.4158	0.0766	0
CTSD_112-122	CTSB_80-87	0.0614	0.8028	0
CTSD_112-122	CTSB_210-220	0.3404	0.1539	0
CTSD_349-357	Age	0.3099	0.1967	0
CTSD_349-357	T-tau (ng/L)	-0.1659	0.4972	0
CTSD_349-357	Aβ1-42 (ng/L)	0.0641	0.7943	0
CTSD_349-357	P-tau (ng/L)	-0.0344	0.8888	0
CTSD_349-357	AP2B1_712-719	0.2684	0.2665	0
CTSD_349-357	AP2B1_835-842	0.314	0.1904	0
CTSD_349-357	AP2B1_868-878	0.3214	0.4821	0
CTSD_349-357	APP_289-301	0.4544	0.0507	0
CTSD_349-357	APP_439-450	0.407	0.0837	0
CTSD_349-357	BSA_421-433	0.4807	0.0372	0
CTSD_349-357	C9_146-154	0.0228	0.9262	0
CTSD_349-357	C9_186-194	-0.0912	0.7103	0
CTSD_349-357	C9_232-242	0.0316	0.8979	0
CTSD_349-357	C9_473-483	0.0912	0.7103	0
CTSD_349-357	C9_497-508	0.093	0.705	0
CTSD_349-357	CTSB_58-71	0.393	0.096	0
CTSD_349-357	CTSB_80-87	-0.0474	0.8473	0
CTSD_349-357	CTSB_210-220	0.3439	0.1494	0
CatF_103-116	Age	0.1092	0.6564	0
CatF_103-116	T-tau (ng/L)	-0.1905	0.4346	0
CatF_103-116	Aβ1-42 (ng/L)	-0.1159	0.6366	0
CatF_103-116	P-tau (ng/L)	0.022	0.9286	0
CatF_103-116	AP2B1_712-719	0.7544	0.0002	0
CatF_103-116	AP2B1_835-842	0.7386	0.0003	0
CatF_103-116	AP2B1_868-878	-0.0357	0.9394	0
CatF_103-116	APP_289-301	0.4316	0.065	0
CatF_103-116	APP_439-450	0.4456	0.0559	0
CatF_103-116	C9_146-154	0.3912	0.0977	0
CatF_103-116	C9_186-194	0.2667	0.2698	0
CatF_103-116	C9_232-242	0.4544	0.0507	0
CatF_103-116	C9_473-483	0.5053	0.0273	0
CatF_103-116	C9_497-508	0.4982	0.0299	0
CatF_103-116	CTSB_58-71	0.1263	0.6064	0
CatF_103-116	CTSB_80-87	0.1123	0.6472	0
CatF_103-116	CTSB_210-220	0.2105	0.387	0
CatF_103-116	CTSD_55-72	0.6649	0.0019	0
CatF_103-116	CTSD_112-122	0.7947	<.0001	0
CatF_103-116	CTSD_349-357	0.4965	0.0306	0
CatF_236-245	Age	0.2333	0.3365	0
CatF_236-245	T-tau (ng/L)	-0.3644	0.1251	0
CatF_236-245	Aβ1-42 (ng/L)	0.1194	0.6263	0
CatF_236-245	P-tau (ng/L)	-0.2566	0.2889	0
CatF_236-245	AP2B1_712-719	0.5632	0.0121	0
CatF_236-245	AP2B1_835-842	0.507	0.0267	0
CatF_236-245	AP2B1_868-878	-0.1786	0.7017	0
CatF_236-245	APP_289-301	0.314	0.1904	0
CatF_236-245	APP_439-450	0.2965	0.2177	0
CatF_236-245	BSA_421-433	0.7667	0.0001	0
CatF_236-245	C9_146-154	0.4579	0.0487	0
CatF_236-245	C9_186-194	0.3158	0.1878	0
CatF_236-245	C9_232-242	0.4439	0.057	0
CatF_236-245	C9_473-483	0.4368	0.0615	0
CatF_236-245	C9_497-508	0.5123	0.0249	0
CatF_236-245	CTSB_58-71	0.1053	0.668	0
CatF_236-245	CTSB_80-87	0.0842	0.7318	0
CatF_236-245	CTSB_210-220	0.2421	0.318	0
CatF_236-245	CTSD_55-72	0.5825	0.0089	0
CatF_236-245	CTSD_112-122	0.707	0.0007	0
CatF_236-245	CTSD_349-357	0.4965	0.0306	0
CatF_266-278	Age	0.0106	0.9658	0
CatF_266-278	T-tau (ng/L)	-0.2283	0.3472	0
CatF_266-278	Aβ1-42 (ng/L)	-0.1738	0.4766	0
CatF_266-278	P-tau (ng/L)	-0.0406	0.869	0
CatF_266-278	AP2B1_712-719	0.6684	0.0018	0
CatF_266-278	AP2B1_835-842	0.7386	0.0003	0
CatF_266-278	AP2B1_868-878	0.1071	0.8192	0
CatF_266-278	APP_289-301	0.4105	0.0808	0
CatF_266-278	APP_439-450	0.4421	0.0581	0
CatF_266-278	C9_146-154	0.3281	0.1703	0
CatF_266-278	C9_186-194	0.2175	0.371	0
CatF_266-278	C9_232-242	0.4316	0.065	0
CatF_266-278	C9_473-483	0.5018	0.0286	0
CatF_266-278	C9_497-508	0.4947	0.0313	0
CatF_266-278	CTSB_58-71	0.2018	0.4075	0
CatF_266-278	CTSB_80-87	0.0912	0.7103	0
CatF_266-278	CTSB_210-220	0.1772	0.468	0
CatF_266-278	CTSD_55-72	0.7737	0.0001	0
CatF_266-278	CTSD_349-357	0.5895	0.0079	0
CatF_442-450	Age	0.1822	0.4553	0
CatF_442-450	T-tau (ng/L)	-0.2555	0.2911	0
CatF_442-450	Aβ1-42 (ng/L)	-0.0439	0.8584	0
CatF_442-450	P-tau (ng/L)	0.067	0.7852	0
CatF_442-450	AP2B1_712-719	0.6789	0.0014	0
CatF_442-450	AP2B1_835-842	0.6667	0.0018	0
CatF_442-450	AP2B1_868-878	-0.0357	0.9394	0
CatF_442-450	APP_289-301	0.5456	0.0157	0
CatF_442-450	APP_439-450	0.5544	0.0138	0
CatF_442-450	C9_146-154	0.2421	0.318	0
CatF_442-450	C9_186-194	0.1105	0.6524	0
CatF_442-450	C9_232-242	0.2895	0.2293	0
CatF_442-450	C9_473-483	0.3789	0.1096	0
CatF_442-450	C9_497-508	0.3544	0.1366	0
CatF_442-450	CTSB_58-71	0.1228	0.6165	0
CatF_442-450	CTSB_80-87	0.0246	0.9205	0
CatF_442-450	CTSB_210-220	0.1842	0.4503	0
CatF_442-450	CTSD_55-72	0.6561	0.0023	0
CatF_442-450	CTSD_112-122	0.7579	0.0002	0
CatF_442-450	CTSD_349-357	0.5614	0.0124	0
CTSL_105-116	Age	0.3266	0.1724	0
CTSL_105-116	T-tau (ng/L)	-0.0158	0.9488	0
CTSL_105-116	Aβ1-42 (ng/L)	0.0509	0.836	0
CTSL_105-116	P-tau (ng/L)	0.1658	0.4976	0
CTSL_105-116	AP2B1_712-719	0.6351	0.0035	0
CTSL_105-116	AP2B1_835-842	0.6754	0.0015	0
CTSL_105-116	AP2B1_868-878	-0.1429	0.7599	0
CTSL_105-116	APP_289-301	0.6789	0.0014	0
CTSL_105-116	APP_439-450	0.6246	0.0043	0
CTSL_105-116	BSA_421-433	0.6246	0.0043	0
CTSL_105-116	C9_146-154	0.2193	0.367	0
CTSL_105-116	C9_186-194	0.1474	0.5471	0
CTSL_105-116	C9_232-242	0.2684	0.2665	0
CTSL_105-116	C9_473-483	0.3474	0.1451	0
CTSL_105-116	C9_497-508	0.307	0.2011	0
CTSL_105-116	CTSB_58-71	0.4614	0.0468	0
CTSL_105-116	CTSB_80-87	0.1754	0.4725	0
CTSL_105-116	CTSB_210-220	0.4193	0.0739	0
CTSL_105-116	CatF_103-116	0.6842	0.0012	0
CTSL_105-116	CatF_236-245	0.6035	0.0062	0
CTSL_105-116	CatF_266-278	0.7789	<.0001	0
CTSL_105-116	CatF_442-450	0.7	0.0008	0
CTSZ_39-47	Age	0.0942	0.7013	0
CTSZ_39-47	T-tau (ng/L)	0.1563	0.5229	0
CTSZ_39-47	Aβ1-42 (ng/L)	-0.0878	0.7208	0
CTSZ_39-47	P-tau (ng/L)	0.1878	0.4413	0
CTSZ_39-47	AP2B1_712-719	0.2895	0.2293	0
CTSZ_39-47	AP2B1_835-842	0.4281	0.0675	0
CTSZ_39-47	AP2B1_868-878	0.5	0.2532	0
CTSZ_39-47	APP_289-301	0.1807	0.4591	0
CTSZ_39-47	APP_439-450	0.2877	0.2323	0
CTSZ_39-47	BSA_421-433	0.3281	0.1703	0
CTSZ_39-47	C9_146-154	0.1211	0.6215	0
CTSZ_39-47	C9_186-194	0.1719	0.4815	0
CTSZ_39-47	C9_232-242	0.2842	0.2383	0
CTSZ_39-47	C9_473-483	0.2702	0.2633	0
CTSZ_39-47	C9_497-508	0.2053	0.3992	0
CTSZ_39-47	CTSB_58-71	0.1825	0.4547	0
CTSZ_39-47	CTSB_80-87	0.0439	0.8585	0
CTSZ_39-47	CTSB_210-220	0.1368	0.5764	0
CTSZ_39-47	CTSD_55-72	0.3842	0.1044	0
CTSZ_39-47	CTSD_112-122	0.3228	0.1777	0
CTSZ_39-47	CTSD_349-357	0.1649	0.4999	0
CTSZ_39-47	CatF_103-116	0.3456	0.1472	0
CTSZ_39-47	CatF_236-245	0.3175	0.1852	0
CTSZ_39-47	CatF_266-278	0.3667	0.1226	0
CTSZ_39-47	CatF_442-450	0.2965	0.2177	0
CTSZ_39-47	CTSL_105-116	0.2947	0.2206	0
CTSZ_261-270	Age	0.6224	0.0044	0
CTSZ_261-270	T-tau (ng/L)	0.1054	0.6677	0
CTSZ_261-270	Aβ1-42 (ng/L)	-0.0316	0.8978	0
CTSZ_261-270	P-tau (ng/L)	0.2998	0.2123	0
CTSZ_261-270	AP2B1_712-719	0.6035	0.0062	0
CTSZ_261-270	AP2B1_835-842	0.593	0.0075	0
CTSZ_261-270	AP2B1_868-878	-0.2857	0.5345	0
CTSZ_261-270	APP_289-301	0.5035	0.028	0
CTSZ_261-270	APP_439-450	0.4947	0.0313	0
CTSZ_261-270	BSA_421-433	0.6228	0.0044	0
CTSZ_261-270	C9_146-154	0.2702	0.2633	0
CTSZ_261-270	C9_186-194	0.2088	0.391	0
CTSZ_261-270	C9_232-242	0.3211	0.1802	0
CTSZ_261-270	C9_473-483	0.3491	0.1429	0
CTSZ_261-270	C9_497-508	0.3789	0.1096	0
CTSZ_261-270	CTSB_58-71	0.5632	0.0121	0
CTSZ_261-270	CTSB_80-87	0.3561	0.1345	0
CTSZ_261-270	CTSB_210-220	0.5193	0.0227	0
CTSZ_261-270	CTSD_55-72	0.7211	0.0005	0
CTSZ_261-270	CTSD_112-122	0.7404	0.0003	0
CTSZ_261-270	CTSD_349-357	0.6649	0.0019	0
CTSZ_261-270	CatF_103-116	0.6386	0.0033	0
CTSZ_261-270	CatF_236-245	0.6404	0.0031	0
CTSZ_261-270	CatF_266-278	0.6123	0.0053	0
CTSZ_261-270	CatF_442-450	0.6228	0.0044	0
CTSZ_261-270	CTSL_105-116	0.7772	<.0001	0
CTSZ_261-270	CTSZ_39-47	0.3895	0.0993	0
DPP7_40-47	Age	0.3354	0.1604	0
DPP7_40-47	T-tau (ng/L)	-0.1361	0.5786	0
DPP7_40-47	Aβ1-42 (ng/L)	0.1124	0.6469	0
DPP7_40-47	P-tau (ng/L)	0.0556	0.8213	0
DPP7_40-47	AP2B1_712-719	0.507	0.0267	0
DPP7_40-47	AP2B1_835-842	0.586	0.0084	0
DPP7_40-47	AP2B1_868-878	0.0714	0.879	0
DPP7_40-47	APP_289-301	0.6789	0.0014	0
DPP7_40-47	APP_439-450	0.6579	0.0022	0
DPP7_40-47	BSA_421-433	0.614	0.0052	0
DPP7_40-47	C9_146-154	0.1895	0.4372	0
DPP7_40-47	C9_186-194	0.1123	0.6472	0
DPP7_40-47	C9_232-242	0.2456	0.3108	0
DPP7_40-47	C9_473-483	0.3211	0.1802	0
DPP7_40-47	C9_497-508	0.3088	0.1984	0
DPP7_40-47	CTSB_58-71	0.3737	0.115	0
DPP7_40-47	CTSB_80-87	0.0789	0.748	0
DPP7_40-47	CTSB_210-220	0.2491	0.3037	0
DPP7_40-47	CTSD_112-122	0.7842	<.0001	0
DPP7_40-47	CTSD_349-357	0.7544	0.0002	0
DPP7_40-47	CatF_103-116	0.6228	0.0044	0
DPP7_40-47	CatF_236-245	0.5982	0.0068	0
DPP7_40-47	CatF_266-278	0.7368	0.0003	0
DPP7_40-47	CatF_442-450	0.6789	0.0014	0
DPP7_40-47	CTSZ_39-47	0.4825	0.0364	0
DPP7_40-47	CTSZ_261-270	0.6807	0.0013	0
DPP7_113-123	Age	0.1074	0.6617	0
DPP7_113-123	T-tau (ng/L)	-0.1176	0.6315	0
DPP7_113-123	Aβ1-42 (ng/L)	-0.0404	0.8696	0
DPP7_113-123	P-tau (ng/L)	-0.1023	0.6769	0
DPP7_113-123	AP2B1_712-719	0.2474	0.3072	0
DPP7_113-123	AP2B1_835-842	0.3737	0.115	0
DPP7_113-123	AP2B1_868-878	-0.0714	0.879	0
DPP7_113-123	APP_289-301	0.4053	0.0852	0
DPP7_113-123	APP_439-450	0.3649	0.1245	0
DPP7_113-123	BSA_421-433	0.4158	0.0766	0
DPP7_113-123	C9_146-154	0.0228	0.9262	0
DPP7_113-123	C9_186-194	0.0316	0.8979	0
DPP7_113-123	C9_232-242	0.1474	0.5471	0
DPP7_113-123	C9_473-483	0.2456	0.3108	0
DPP7_113-123	C9_497-508	0.2105	0.387	0
DPP7_113-123	CTSB_58-71	0.3544	0.1366	0
DPP7_113-123	CTSB_80-87	-0.1123	0.6472	0
DPP7_113-123	CTSB_210-220	0.1035	0.6733	0
DPP7_113-123	CTSD_55-72	0.7526	0.0002	0
DPP7_113-123	CTSD_112-122	0.7018	0.0008	0
DPP7_113-123	CTSD_349-357	0.6386	0.0033	0
DPP7_113-123	CatF_103-116	0.4246	0.07	0
DPP7_113-123	CatF_236-245	0.3912	0.0977	0
DPP7_113-123	CatF_266-278	0.6404	0.0031	0
DPP7_113-123	CatF_442-450	0.4561	0.0497	0
DPP7_113-123	CTSL_105-116	0.7509	0.0002	0
DPP7_113-123	CTSZ_39-47	0.4965	0.0306	0
DPP7_113-123	CTSZ_261-270	0.5018	0.0286	0
DPP7_449-462	Age	0.3204	0.1811	0
DPP7_449-462	T-tau (ng/L)	-0.1264	0.606	0
DPP7_449-462	Aβ1-42 (ng/L)	0.1326	0.5885	0
DPP7_449-462	P-tau (ng/L)	0.0256	0.9172	0
DPP7_449-462	AP2B1_712-719	0.3982	0.0913	0
DPP7_449-462	AP2B1_835-842	0.4947	0.0313	0
DPP7_449-462	AP2B1_868-878	0.0357	0.9394	0
DPP7_449-462	APP_289-301	0.4614	0.0468	0
DPP7_449-462	APP_439-450	0.4421	0.0581	0
DPP7_449-462	BSA_421-433	0.6772	0.0014	0
DPP7_449-462	C9_146-154	0.1228	0.6165	0
DPP7_449-462	C9_186-194	0.0298	0.9035	0
DPP7_449-462	C9_232-242	0.2158	0.3749	0
DPP7_449-462	C9_473-483	0.2807	0.2444	0
DPP7_449-462	C9_497-508	0.307	0.2011	0
DPP7_449-462	CTSB_58-71	0.3895	0.0993	0
DPP7_449-462	CTSB_80-87	0.0526	0.8306	0
DPP7_449-462	CTSB_210-220	0.1737	0.477	0
DPP7_449-462	CTSD_349-357	0.7386	0.0003	0
DPP7_449-462	CatF_103-116	0.6211	0.0045	0
DPP7_449-462	CatF_236-245	0.6211	0.0045	0
DPP7_449-462	CatF_266-278	0.7684	0.0001	0
DPP7_449-462	CatF_442-450	0.6351	0.0035	0
DPP7_449-462	CTSZ_39-47	0.4351	0.0626	0
DPP7_449-462	CTSZ_261-270	0.7053	0.0007	0
GM2A_89-96	Age	0.4437	0.0571	0
GM2A_89-96	T-tau (ng/L)	0.1097	0.6547	0
GM2A_89-96	Aβ1-42 (ng/L)	0.0325	0.895	0
GM2A_89-96	P-tau (ng/L)	0.328	0.1703	0
GM2A_89-96	AP2B1_712-719	0.6877	0.0011	0
GM2A_89-96	AP2B1_835-842	0.6825	0.0013	0
GM2A_89-96	AP2B1_868-878	-0.2857	0.5345	0
GM2A_89-96	APP_289-301	0.2965	0.2177	0
GM2A_89-96	APP_439-450	0.3947	0.0944	0
GM2A_89-96	BSA_421-433	0.5158	0.0238	0
GM2A_89-96	C9_146-154	0.6789	0.0014	0
GM2A_89-96	C9_186-194	0.5912	0.0077	0
GM2A_89-96	C9_232-242	0.693	0.001	0
GM2A_89-96	C9_473-483	0.6772	0.0014	0
GM2A_89-96	C9_497-508	0.6526	0.0025	0
GM2A_89-96	CTSB_58-71	0.2544	0.2933	0
GM2A_89-96	CTSB_80-87	0.5158	0.0238	0
GM2A_89-96	CTSB_210-220	0.5	0.0293	0
GM2A_89-96	CTSD_55-72	0.2491	0.3037	0
GM2A_89-96	CTSD_112-122	0.2632	0.2764	0
GM2A_89-96	CTSD_349-357	0.0491	0.8417	0
GM2A_89-96	CatF_103-116	0.4474	0.0548	0
GM2A_89-96	CatF_236-245	0.4088	0.0823	0
GM2A_89-96	CatF_266-278	0.3561	0.1345	0
GM2A_89-96	CatF_442-450	0.3281	0.1703	0
GM2A_89-96	CTSL_105-116	0.3439	0.1494	0
GM2A_89-96	CTSZ_39-47	0.1614	0.5092	0
GM2A_89-96	CTSZ_261-270	0.4579	0.0487	0
GM2A_89-96	DPP7_40-47	0.2193	0.367	0
GM2A_89-96	DPP7_113-123	-0.0807	0.7426	0
GM2A_89-96	DPP7_449-462	0.186	0.4459	0
GM2A_170-179	Age	0.4331	0.064	0
GM2A_170-179	T-tau (ng/L)	0.403	0.0871	0
GM2A_170-179	Aβ1-42 (ng/L)	0.338	0.1569	0
GM2A_170-179	P-tau (ng/L)	0.478	0.0385	0
GM2A_170-179	AP2B1_712-719	0.2491	0.3037	0
GM2A_170-179	AP2B1_835-842	0.3333	0.1631	0
GM2A_170-179	AP2B1_868-878	-0.2857	0.5345	0
GM2A_170-179	APP_289-301	0.2649	0.2731	0
GM2A_170-179	APP_439-450	0.2421	0.318	0
GM2A_170-179	BSA_421-433	-0.1053	0.668	0
GM2A_170-179	C9_146-154	0.1368	0.5764	0
GM2A_170-179	C9_186-194	0.1772	0.468	0
GM2A_170-179	C9_232-242	0.2386	0.3253	0
GM2A_170-179	C9_473-483	0.1123	0.6472	0
GM2A_170-179	C9_497-508	0.0561	0.8194	0
GM2A_170-179	CTSB_58-71	0.5105	0.0255	0
GM2A_170-179	CTSB_80-87	0.5544	0.0138	0
GM2A_170-179	CTSB_210-220	0.6193	0.0047	0
GM2A_170-179	CTSD_55-72	0.0912	0.7103	0
GM2A_170-179	CTSD_112-122	-0.014	0.9545	0
GM2A_170-179	CTSD_349-357	0.0368	0.881	0
GM2A_170-179	CatF_103-116	-0.0333	0.8922	0
GM2A_170-179	CatF_236-245	-0.1035	0.6733	0
GM2A_170-179	CatF_266-278	-0.1263	0.6064	0
GM2A_170-179	CatF_442-450	0.0158	0.9488	0
GM2A_170-179	CTSL_105-116	0.1702	0.4861	0
GM2A_170-179	CTSZ_39-47	0.014	0.9545	0
GM2A_170-179	CTSZ_261-270	0.2246	0.3553	0
GM2A_170-179	DPP7_40-47	0.0123	0.9602	0
GM2A_170-179	DPP7_113-123	-0.1982	0.4159	0
GM2A_170-179	DPP7_449-462	-0.0632	0.7973	0
GM2A_170-179	GM2A_89-96	0.5088	0.0261	0
HEXB_285-300	Age	-0.0977	0.6907	0
HEXB_285-300	T-tau (ng/L)	0.101	0.6809	0
HEXB_285-300	Aβ1-42 (ng/L)	-0.2002	0.4113	0
HEXB_285-300	P-tau (ng/L)	0.172	0.4815	0
HEXB_285-300	AP2B1_712-719	0.5684	0.0111	0
HEXB_285-300	AP2B1_835-842	0.7193	0.0005	0
HEXB_285-300	AP2B1_868-878	0.5714	0.1802	0
HEXB_285-300	APP_289-301	0.4526	0.0517	0
HEXB_285-300	APP_439-450	0.5333	0.0187	0
HEXB_285-300	BSA_421-433	0.5351	0.0182	0
HEXB_285-300	C9_146-154	0.0211	0.9318	0
HEXB_285-300	C9_186-194	-0.0386	0.8753	0
HEXB_285-300	C9_232-242	0.1667	0.4953	0
HEXB_285-300	C9_473-483	0.2316	0.3401	0
HEXB_285-300	C9_497-508	0.2158	0.3749	0
HEXB_285-300	CTSB_58-71	0.5035	0.028	0
HEXB_285-300	CTSB_80-87	0.3193	0.1827	0
HEXB_285-300	CTSB_210-220	0.3228	0.1777	0
HEXB_285-300	CTSD_55-72	0.7298	0.0004	0
HEXB_285-300	CTSD_112-122	0.7281	0.0004	0
HEXB_285-300	CTSD_349-357	0.5386	0.0174	0
HEXB_285-300	CatF_103-116	0.6579	0.0022	0
HEXB_285-300	CatF_236-245	0.4842	0.0357	0
HEXB_285-300	CatF_266-278	0.7596	0.0002	0
HEXB_285-300	CatF_442-450	0.6632	0.002	0
HEXB_285-300	CTSL_105-116	0.693	0.001	0
HEXB_285-300	CTSZ_39-47	0.4632	0.0458	0
HEXB_285-300	CTSZ_261-270	0.5123	0.0249	0
HEXB_285-300	DPP7_40-47	0.7193	0.0005	0
HEXB_285-300	DPP7_113-123	0.6105	0.0055	0
HEXB_285-300	DPP7_449-462	0.6772	0.0014	0
HEXB_285-300	GM2A_89-96	0.1947	0.4243	0
HEXB_285-300	GM2A_170-179	0.0474	0.8473	0
HEXB_391-400	Age	0.3416	0.1524	0
HEXB_391-400	T-tau (ng/L)	0.0799	0.7451	0
HEXB_391-400	Aβ1-42 (ng/L)	0.137	0.5761	0
HEXB_391-400	P-tau (ng/L)	0.3439	0.1494	0
HEXB_391-400	AP2B1_712-719	0.6544	0.0024	0
HEXB_391-400	AP2B1_835-842	0.7386	0.0003	0
HEXB_391-400	AP2B1_868-878	0.2857	0.5345	0
HEXB_391-400	APP_289-301	0.7368	0.0003	0
HEXB_391-400	APP_439-450	0.7596	0.0002	0
HEXB_391-400	BSA_421-433	0.6105	0.0055	0
HEXB_391-400	C9_146-154	0.1018	0.6785	0
HEXB_391-400	C9_186-194	0.0351	0.8866	0
HEXB_391-400	C9_232-242	0.1877	0.4415	0
HEXB_391-400	C9_473-483	0.2509	0.3002	0
HEXB_391-400	C9_497-508	0.2035	0.4034	0
HEXB_391-400	CTSB_58-71	0.4526	0.0517	0
HEXB_391-400	CTSB_80-87	0.2316	0.3401	0
HEXB_391-400	CTSB_210-220	0.3596	0.1304	0
HEXB_391-400	CTSD_112-122	0.7509	0.0002	0
HEXB_391-400	CTSD_349-357	0.7123	0.0006	0
HEXB_391-400	CatF_103-116	0.6526	0.0025	0
HEXB_391-400	CatF_236-245	0.5351	0.0182	0
HEXB_391-400	CatF_266-278	0.6912	0.001	0
HEXB_391-400	CatF_442-450	0.7404	0.0003	0
HEXB_391-400	CTSZ_39-47	0.4772	0.0388	0
HEXB_391-400	CTSZ_261-270	0.7333	0.0004	0
HEXB_391-400	DPP7_113-123	0.6509	0.0025	0
HEXB_391-400	GM2A_89-96	0.3491	0.1429	0
HEXB_391-400	GM2A_170-179	0.2842	0.2383	0
LAMP1_138-146	Age	0.7747	<.0001	0
LAMP1_138-146	T-tau (ng/L)	0.144	0.5565	0
LAMP1_138-146	Aβ1-42 (ng/L)	0.1642	0.5018	0
LAMP1_138-146	P-tau (ng/L)	0.224	0.3566	0
LAMP1_138-146	AP2B1_712-719	0.3877	0.101	0
LAMP1_138-146	AP2B1_835-842	0.4316	0.065	0
LAMP1_138-146	APP_289-301	0.5246	0.0211	0
LAMP1_138-146	APP_439-450	0.4351	0.0626	0
LAMP1_138-146	BSA_421-433	0.2035	0.4034	0
LAMP1_138-146	C9_146-154	0.5193	0.0227	0
LAMP1_138-146	C9_186-194	0.5228	0.0216	0
LAMP1_138-146	C9_232-242	0.5316	0.0192	0
LAMP1_138-146	C9_473-483	0.5421	0.0165	0
LAMP1_138-146	C9_497-508	0.5298	0.0196	0
LAMP1_138-146	CTSB_58-71	0.6667	0.0018	0
LAMP1_138-146	CTSB_80-87	0.4246	0.07	0
LAMP1_138-146	CTSB_210-220	0.7105	0.0007	0
LAMP1_138-146	CTSD_55-72	0.5246	0.0211	0
LAMP1_138-146	CTSD_112-122	0.4105	0.0808	0
LAMP1_138-146	CTSD_349-357	0.4614	0.0468	0
LAMP1_138-146	CatF_103-116	0.2439	0.3144	0
LAMP1_138-146	CatF_236-245	0.2895	0.2293	0
LAMP1_138-146	CatF_266-278	0.2421	0.318	0
LAMP1_138-146	CatF_442-450	0.2789	0.2475	0
LAMP1_138-146	CTSL_105-116	0.6228	0.0044	0
LAMP1_138-146	CTSZ_39-47	0.0965	0.6943	0
LAMP1_138-146	CTSZ_261-270	0.6421	0.003	0
LAMP1_138-146	DPP7_40-47	0.5421	0.0165	0
LAMP1_138-146	DPP7_113-123	0.3807	0.1078	0
LAMP1_138-146	DPP7_449-462	0.4614	0.0468	0
LAMP1_138-146	GM2A_89-96	0.5105	0.0255	0
LAMP1_138-146	GM2A_170-179	0.5316	0.0192	0
LAMP1_138-146	HEXB_285-300	0.207	0.3951	0
LAMP1_138-146	HEXB_391-400	0.5246	0.0211	0
LAMP1_327-337	Age	0.4921	0.0323	0
LAMP1_327-337	T-tau (ng/L)	0.0474	0.8472	0
LAMP1_327-337	Aβ1-42 (ng/L)	-0.1844	0.4499	0
LAMP1_327-337	P-tau (ng/L)	0.2011	0.4092	0
LAMP1_327-337	AP2B1_712-719	0.4035	0.0867	0
LAMP1_327-337	AP2B1_835-842	0.5772	0.0097	0
LAMP1_327-337	AP2B1_868-878	-0.4643	0.2939	0
LAMP1_327-337	APP_289-301	0.4439	0.057	0
LAMP1_327-337	APP_439-450	0.5018	0.0286	0
LAMP1_327-337	BSA_421-433	0.407	0.0837	0
LAMP1_327-337	C9_146-154	0.3965	0.0928	0
LAMP1_327-337	C9_186-194	0.3509	0.1408	0
LAMP1_327-337	C9_232-242	0.4667	0.044	0
LAMP1_327-337	C9_473-483	0.5404	0.0169	0
LAMP1_327-337	C9_497-508	0.5614	0.0124	0
LAMP1_327-337	CTSB_58-71	0.7509	0.0002	0
LAMP1_327-337	CTSB_80-87	0.5211	0.0222	0
LAMP1_327-337	CTSB_210-220	0.6561	0.0023	0
LAMP1_327-337	CTSD_55-72	0.5737	0.0102	0
LAMP1_327-337	CTSD_112-122	0.5614	0.0124	0
LAMP1_327-337	CTSD_349-357	0.4912	0.0327	0
LAMP1_327-337	CatF_103-116	0.3632	0.1265	0
LAMP1_327-337	CatF_236-245	0.2754	0.2537	0
LAMP1_327-337	CatF_266-278	0.4772	0.0388	0
LAMP1_327-337	CatF_442-450	0.4281	0.0675	0
LAMP1_327-337	CTSL_105-116	0.6614	0.002	0
LAMP1_327-337	CTSZ_39-47	0.1439	0.5568	0
LAMP1_327-337	CTSZ_261-270	0.6351	0.0035	0
LAMP1_327-337	DPP7_40-47	0.6351	0.0035	0
LAMP1_327-337	DPP7_113-123	0.5351	0.0182	0
LAMP1_327-337	DPP7_449-462	0.614	0.0052	0
LAMP1_327-337	GM2A_89-96	0.4421	0.0581	0
LAMP1_327-337	GM2A_170-179	0.3211	0.1802	0
LAMP1_327-337	HEXB_285-300	0.5667	0.0114	0
LAMP1_327-337	HEXB_391-400	0.6386	0.0033	0
LAMP1_327-337	LAMP1_138-146	0.7649	0.0001	0
LAMP1_357-363	Age	0.4894	0.0334	0
LAMP1_357-363	T-tau (ng/L)	-0.1352	0.581	0
LAMP1_357-363	Aβ1-42 (ng/L)	-0.0448	0.8556	0
LAMP1_357-363	P-tau (ng/L)	0.2549	0.2924	0
LAMP1_357-363	AP2B1_712-719	0.6105	0.0055	0
LAMP1_357-363	AP2B1_835-842	0.707	0.0007	0
LAMP1_357-363	AP2B1_868-878	-0.4286	0.3374	0
LAMP1_357-363	APP_289-301	0.6298	0.0039	0
LAMP1_357-363	APP_439-450	0.6877	0.0011	0
LAMP1_357-363	BSA_421-433	0.6491	0.0026	0
LAMP1_357-363	C9_146-154	0.4421	0.0581	0
LAMP1_357-363	C9_186-194	0.3228	0.1777	0
LAMP1_357-363	C9_232-242	0.4947	0.0313	0
LAMP1_357-363	C9_473-483	0.614	0.0052	0
LAMP1_357-363	C9_497-508	0.5684	0.0111	0
LAMP1_357-363	CTSB_58-71	0.4491	0.0537	0
LAMP1_357-363	CTSB_80-87	0.3088	0.1984	0
LAMP1_357-363	CTSB_210-220	0.4912	0.0327	0
LAMP1_357-363	CTSD_55-72	0.6596	0.0021	0
LAMP1_357-363	CTSD_112-122	0.6175	0.0048	0
LAMP1_357-363	CTSD_349-357	0.5281	0.0201	0
LAMP1_357-363	CatF_103-116	0.6035	0.0062	0
LAMP1_357-363	CatF_236-245	0.4825	0.0364	0
LAMP1_357-363	CatF_266-278	0.6333	0.0036	0
LAMP1_357-363	CatF_442-450	0.6807	0.0013	0
LAMP1_357-363	CTSL_105-116	0.7316	0.0004	0
LAMP1_357-363	CTSZ_39-47	0.2105	0.387	0
LAMP1_357-363	CTSZ_261-270	0.6053	0.006	0
LAMP1_357-363	DPP7_40-47	0.714	0.0006	0
LAMP1_357-363	DPP7_113-123	0.4649	0.0449	0
LAMP1_357-363	DPP7_449-462	0.6228	0.0044	0
LAMP1_357-363	GM2A_89-96	0.6246	0.0043	0
LAMP1_357-363	GM2A_170-179	0.3088	0.1984	0
LAMP1_357-363	HEXB_285-300	0.6088	0.0057	0
LAMP1_357-363	HEXB_391-400	0.7579	0.0002	0
LAMP1_357-363	LAMP1_138-146	0.6947	0.001	0
LAMP2_133-144	Age	0.3248	0.1748	0
LAMP2_133-144	T-tau (ng/L)	0.381	0.1075	0
LAMP2_133-144	Aβ1-42 (ng/L)	0.0378	0.8781	0
LAMP2_133-144	P-tau (ng/L)	0.6332	0.0036	0
LAMP2_133-144	AP2B1_712-719	0.5596	0.0127	0
LAMP2_133-144	AP2B1_835-842	0.4807	0.0372	0
LAMP2_133-144	AP2B1_868-878	0.2857	0.5345	0
LAMP2_133-144	APP_289-301	0.7	0.0008	0
LAMP2_133-144	APP_439-450	0.6246	0.0043	0
LAMP2_133-144	BSA_421-433	0.3281	0.1703	0
LAMP2_133-144	C9_146-154	-0.1842	0.4503	0
LAMP2_133-144	C9_186-194	-0.2702	0.2633	0
LAMP2_133-144	C9_232-242	-0.1316	0.5913	0
LAMP2_133-144	C9_473-483	-0.0965	0.6943	0
LAMP2_133-144	C9_497-508	-0.1614	0.5092	0
LAMP2_133-144	CTSB_58-71	0.3895	0.0993	0
LAMP2_133-144	CTSB_80-87	0.3754	0.1132	0
LAMP2_133-144	CTSB_210-220	0.3	0.2121	0
LAMP2_133-144	CTSD_55-72	0.4579	0.0487	0
LAMP2_133-144	CTSD_112-122	0.3842	0.1044	0
LAMP2_133-144	CTSD_349-357	0.4509	0.0527	0
LAMP2_133-144	CatF_103-116	0.3579	0.1325	0
LAMP2_133-144	CatF_236-245	0.1544	0.528	0
LAMP2_133-144	CatF_266-278	0.286	0.2353	0
LAMP2_133-144	CatF_442-450	0.4684	0.0431	0
LAMP2_133-144	CTSL_105-116	0.5596	0.0127	0
LAMP2_133-144	CTSZ_39-47	0.0386	0.8753	0
LAMP2_133-144	CTSZ_261-270	0.4702	0.0422	0
LAMP2_133-144	DPP7_40-47	0.4544	0.0507	0
LAMP2_133-144	DPP7_113-123	0.1386	0.5715	0
LAMP2_133-144	DPP7_449-462	0.3491	0.1429	0
LAMP2_133-144	GM2A_89-96	0.2912	0.2264	0
LAMP2_133-144	GM2A_170-179	0.4965	0.0306	0
LAMP2_133-144	HEXB_285-300	0.486	0.0349	0
LAMP2_133-144	HEXB_391-400	0.6789	0.0014	0
LAMP2_133-144	LAMP1_138-146	0.3667	0.1226	0
LAMP2_133-144	LAMP1_327-337	0.3544	0.1366	0
LAMP2_133-144	LAMP1_357-363	0.4982	0.0299	0
LAMP2_145-152	Age	0.4472	0.0549	0
LAMP2_145-152	T-tau (ng/L)	-0.0026	0.9915	0
LAMP2_145-152	Aβ1-42 (ng/L)	-0.0773	0.7532	0
LAMP2_145-152	P-tau (ng/L)	0.0864	0.725	0
LAMP2_145-152	AP2B1_712-719	0.7719	0.0001	0
LAMP2_145-152	AP2B1_835-842	0.7842	<.0001	0
LAMP2_145-152	AP2B1_868-878	-0.4643	0.2939	0
LAMP2_145-152	APP_289-301	0.4807	0.0372	0
LAMP2_145-152	APP_439-450	0.4947	0.0313	0
LAMP2_145-152	BSA_421-433	0.6561	0.0023	0
LAMP2_145-152	C9_146-154	0.7123	0.0006	0
LAMP2_145-152	C9_186-194	0.6456	0.0028	0
LAMP2_145-152	C9_232-242	0.7491	0.0002	0
LAMP2_145-152	C9_473-483	0.7684	0.0001	0
LAMP2_145-152	C9_497-508	0.7579	0.0002	0
LAMP2_145-152	CTSB_58-71	0.4175	0.0753	0
LAMP2_145-152	CTSB_80-87	0.3316	0.1655	0
LAMP2_145-152	CTSB_210-220	0.5193	0.0227	0
LAMP2_145-152	CTSD_55-72	0.714	0.0006	0
LAMP2_145-152	CTSD_112-122	0.7281	0.0004	0
LAMP2_145-152	CTSD_349-357	0.5018	0.0286	0
LAMP2_145-152	CatF_103-116	0.7158	0.0006	0
LAMP2_145-152	CatF_236-245	0.7105	0.0007	0
LAMP2_145-152	CatF_266-278	0.7105	0.0007	0
LAMP2_145-152	CatF_442-450	0.586	0.0084	0
LAMP2_145-152	CTSL_105-116	0.7439	0.0003	0
LAMP2_145-152	CTSZ_39-47	0.3772	0.1114	0
LAMP2_145-152	CTSZ_261-270	0.7614	0.0002	0
LAMP2_145-152	DPP7_40-47	0.6561	0.0023	0
LAMP2_145-152	DPP7_113-123	0.4614	0.0468	0
LAMP2_145-152	DPP7_449-462	0.6	0.0066	0
LAMP2_145-152	GM2A_89-96	0.7263	0.0004	0
LAMP2_145-152	GM2A_170-179	0.2035	0.4034	0
LAMP2_145-152	HEXB_285-300	0.4947	0.0313	0
LAMP2_145-152	HEXB_391-400	0.6281	0.004	0
LAMP2_145-152	LAMP1_138-146	0.6789	0.0014	0
LAMP2_145-152	LAMP1_327-337	0.6	0.0066	0
LAMP2_145-152	LAMP1_357-363	0.7088	0.0007	0
LAMP2_145-152	LAMP2_133-144	0.2772	0.2506	0
LAMP2_153-161	Age	0.39	0.0988	0
LAMP2_153-161	T-tau (ng/L)	0.1791	0.4632	0
LAMP2_153-161	Aβ1-42 (ng/L)	0.5277	0.0202	0
LAMP2_153-161	P-tau (ng/L)	0.3183	0.1841	0
LAMP2_153-161	AP2B1_712-719	0.2509	0.3002	0
LAMP2_153-161	AP2B1_835-842	0.1982	0.4159	0
LAMP2_153-161	AP2B1_868-878	-0.2857	0.5345	0
LAMP2_153-161	APP_289-301	0.607	0.0059	0
LAMP2_153-161	APP_439-450	0.4404	0.0592	0
LAMP2_153-161	BSA_421-433	-0.0228	0.9262	0
LAMP2_153-161	C9_146-154	-0.1351	0.5814	0
LAMP2_153-161	C9_186-194	-0.0404	0.8697	0
LAMP2_153-161	C9_232-242	-0.0842	0.7318	0
LAMP2_153-161	C9_473-483	-0.107	0.6628	0
LAMP2_153-161	C9_497-508	-0.2105	0.387	0
LAMP2_153-161	CTSB_58-71	0.1105	0.6524	0
LAMP2_153-161	CTSB_80-87	-0.0281	0.9092	0
LAMP2_153-161	CTSB_210-220	0.0895	0.7157	0
LAMP2_153-161	CTSD_55-72	0.3895	0.0993	0
LAMP2_153-161	CTSD_112-122	0.193	0.4286	0
LAMP2_153-161	CTSD_349-357	0.3807	0.1078	0
LAMP2_153-161	CatF_103-116	0.0895	0.7157	0
LAMP2_153-161	CatF_236-245	0.0754	0.7589	0
LAMP2_153-161	CatF_266-278	0.1	0.6838	0
LAMP2_153-161	CatF_442-450	0.1298	0.5963	0
LAMP2_153-161	CTSL_105-116	0.4789	0.038	0
LAMP2_153-161	CTSZ_39-47	-0.0281	0.9092	0
LAMP2_153-161	CTSZ_261-270	0.3211	0.1802	0
LAMP2_153-161	DPP7_40-47	0.3561	0.1345	0
LAMP2_153-161	DPP7_113-123	0.2474	0.3072	0
LAMP2_153-161	DPP7_449-462	0.2877	0.2323	0
LAMP2_153-161	GM2A_89-96	0.0719	0.7698	0
LAMP2_153-161	GM2A_170-179	0.4105	0.0808	0
LAMP2_153-161	HEXB_285-300	0.0421	0.8641	0
LAMP2_153-161	HEXB_391-400	0.4105	0.0808	0
LAMP2_153-161	LAMP1_138-146	0.4684	0.0431	0
LAMP2_153-161	LAMP1_327-337	0.0842	0.7318	0
LAMP2_153-161	LAMP1_357-363	0.193	0.4286	0
LAMP2_153-161	LAMP2_133-144	0.4439	0.057	0
LAMP2_153-161	LAMP2_145-152	0.2298	0.3439	0
LAMP2_281-289	Age	0.3319	0.1651	0
LAMP2_281-289	T-tau (ng/L)	0.2248	0.3549	0
LAMP2_281-289	Aβ1-42 (ng/L)	0.0439	0.8584	0
LAMP2_281-289	P-tau (ng/L)	0.5626	0.0122	0
LAMP2_281-289	AP2B1_712-719	0.5947	0.0072	0
LAMP2_281-289	AP2B1_835-842	0.5456	0.0157	0
LAMP2_281-289	AP2B1_868-878	0.3571	0.4316	0
LAMP2_281-289	APP_289-301	0.7368	0.0003	0
LAMP2_281-289	APP_439-450	0.6965	0.0009	0
LAMP2_281-289	BSA_421-433	0.4474	0.0548	0
LAMP2_281-289	C9_146-154	-0.1772	0.468	0
LAMP2_281-289	C9_186-194	-0.2667	0.2698	0
LAMP2_281-289	C9_232-242	-0.1158	0.6369	0
LAMP2_281-289	C9_473-483	-0.0105	0.9659	0
LAMP2_281-289	C9_497-508	-0.0947	0.6997	0
LAMP2_281-289	CTSB_58-71	0.3912	0.0977	0
LAMP2_281-289	CTSB_80-87	0.2316	0.3401	0
LAMP2_281-289	CTSB_210-220	0.2982	0.2149	0
LAMP2_281-289	CTSD_55-72	0.6772	0.0014	0
LAMP2_281-289	CTSD_112-122	0.5667	0.0114	0
LAMP2_281-289	CTSD_349-357	0.6386	0.0033	0
LAMP2_281-289	CatF_103-116	0.4772	0.0388	0
LAMP2_281-289	CatF_236-245	0.3	0.2121	0
LAMP2_281-289	CatF_266-278	0.4614	0.0468	0
LAMP2_281-289	CatF_442-450	0.5789	0.0094	0
LAMP2_281-289	CTSL_105-116	0.7246	0.0005	0
LAMP2_281-289	CTSZ_39-47	0.1421	0.5617	0
LAMP2_281-289	CTSZ_261-270	0.6088	0.0057	0
LAMP2_281-289	DPP7_40-47	0.6088	0.0057	0
LAMP2_281-289	DPP7_113-123	0.3368	0.1585	0
LAMP2_281-289	DPP7_449-462	0.5175	0.0232	0
LAMP2_281-289	GM2A_89-96	0.3035	0.2065	0
LAMP2_281-289	GM2A_170-179	0.3316	0.1655	0
LAMP2_281-289	HEXB_285-300	0.6333	0.0036	0
LAMP2_281-289	HEXB_391-400	0.7982	<.0001	0
LAMP2_281-289	LAMP1_138-146	0.4175	0.0753	0
LAMP2_281-289	LAMP1_327-337	0.4404	0.0592	0
LAMP2_281-289	LAMP1_357-363	0.6544	0.0024	0
LAMP2_281-289	LAMP2_145-152	0.4211	0.0726	0
LAMP2_281-289	LAMP2_153-161	0.5053	0.0273	0
LYZ_52-59	Age	0.3046	0.2048	0
LYZ_52-59	T-tau (ng/L)	-0.3468	0.1458	0
LYZ_52-59	Aβ1-42 (ng/L)	-0.0272	0.9119	0
LYZ_52-59	P-tau (ng/L)	-0.1667	0.4953	0
LYZ_52-59	AP2B1_712-719	0.2842	0.2383	0
LYZ_52-59	AP2B1_835-842	0.2246	0.3553	0
LYZ_52-59	AP2B1_868-878	-0.5	0.2532	0
LYZ_52-59	APP_289-301	-0.086	0.7264	0
LYZ_52-59	APP_439-450	0.007	0.9773	0
LYZ_52-59	BSA_421-433	0.4456	0.0559	0
LYZ_52-59	C9_146-154	0.7491	0.0002	0
LYZ_52-59	C9_186-194	0.5825	0.0089	0
LYZ_52-59	C9_232-242	0.6386	0.0033	0
LYZ_52-59	C9_473-483	0.6263	0.0041	0
LYZ_52-59	C9_497-508	0.6965	0.0009	0
LYZ_52-59	CTSB_58-71	-0.1491	0.5423	0
LYZ_52-59	CTSB_80-87	0.1386	0.5715	0
LYZ_52-59	CTSB_210-220	0.1368	0.5764	0
LYZ_52-59	CTSD_55-72	-0.0316	0.8979	0
LYZ_52-59	CTSD_112-122	0.0737	0.7643	0
LYZ_52-59	CTSD_349-357	-0.1088	0.6576	0
LYZ_52-59	CatF_103-116	0.2789	0.2475	0
LYZ_52-59	CatF_236-245	0.4053	0.0852	0
LYZ_52-59	CatF_266-278	0.193	0.4286	0
LYZ_52-59	CatF_442-450	0.1386	0.5715	0
LYZ_52-59	CTSL_105-116	0.0053	0.9829	0
LYZ_52-59	CTSZ_39-47	0.0158	0.9488	0
LYZ_52-59	CTSZ_261-270	0.1544	0.528	0
LYZ_52-59	DPP7_40-47	0.0105	0.9659	0
LYZ_52-59	DPP7_113-123	-0.2018	0.4075	0
LYZ_52-59	DPP7_449-462	0.0211	0.9318	0
LYZ_52-59	GM2A_89-96	0.7281	0.0004	0
LYZ_52-59	GM2A_170-179	0	1	0
LYZ_52-59	HEXB_285-300	-0.1702	0.4861	0
LYZ_52-59	HEXB_391-400	-0.0737	0.7643	0
LYZ_52-59	LAMP1_138-146	0.1965	0.4201	0
LYZ_52-59	LAMP1_327-337	0.1263	0.6064	0
LYZ_52-59	LAMP1_357-363	0.3316	0.1655	0
LYZ_52-59	LAMP2_133-144	-0.1877	0.4415	0
LYZ_52-59	LAMP2_145-152	0.5123	0.0249	0
LYZ_52-59	LAMP2_153-161	-0.3298	0.1679	0
LYZ_52-59	LAMP2_281-289	-0.1649	0.4999	0
LYZ_69-80	Age	0.4049	0.0855	0
LYZ_69-80	T-tau (ng/L)	-0.0351	0.8865	0
LYZ_69-80	Aβ1-42 (ng/L)	-0.0975	0.6914	0
LYZ_69-80	P-tau (ng/L)	0.134	0.5843	0
LYZ_69-80	AP2B1_712-719	0.4491	0.0537	0
LYZ_69-80	AP2B1_835-842	0.3965	0.0928	0
LYZ_69-80	AP2B1_868-878	-0.7143	0.0713	0
LYZ_69-80	APP_289-301	0.007	0.9773	0
LYZ_69-80	APP_439-450	0.0684	0.7808	0
LYZ_69-80	BSA_421-433	0.5333	0.0187	0
LYZ_69-80	C9_146-154	0.6719	0.0016	0
LYZ_69-80	C9_186-194	0.5596	0.0127	0
LYZ_69-80	C9_232-242	0.6684	0.0018	0
LYZ_69-80	C9_473-483	0.7298	0.0004	0
LYZ_69-80	C9_497-508	0.7246	0.0005	0
LYZ_69-80	CTSB_58-71	0.0228	0.9262	0
LYZ_69-80	CTSB_80-87	0.1035	0.6733	0
LYZ_69-80	CTSB_210-220	0.0895	0.7157	0
LYZ_69-80	CTSD_55-72	0.1035	0.6733	0
LYZ_69-80	CTSD_112-122	0.1719	0.4815	0
LYZ_69-80	CTSD_349-357	-0.0965	0.6943	0
LYZ_69-80	CatF_103-116	0.3123	0.193	0
LYZ_69-80	CatF_236-245	0.3035	0.2065	0
LYZ_69-80	CatF_266-278	0.2561	0.2898	0
LYZ_69-80	CatF_442-450	0.2123	0.3829	0
LYZ_69-80	CTSL_105-116	0.1439	0.5568	0
LYZ_69-80	CTSZ_39-47	0.0825	0.7372	0
LYZ_69-80	CTSZ_261-270	0.293	0.2235	0
LYZ_69-80	DPP7_40-47	0.1333	0.5863	0
LYZ_69-80	DPP7_113-123	0.014	0.9545	0
LYZ_69-80	DPP7_449-462	0.1737	0.477	0
LYZ_69-80	GM2A_89-96	0.7491	0.0002	0
LYZ_69-80	GM2A_170-179	0.0895	0.7157	0
LYZ_69-80	HEXB_285-300	-0.0561	0.8194	0
LYZ_69-80	HEXB_391-400	0.0825	0.7372	0
LYZ_69-80	LAMP1_138-146	0.3561	0.1345	0
LYZ_69-80	LAMP1_327-337	0.3175	0.1852	0
LYZ_69-80	LAMP1_357-363	0.4596	0.0477	0
LYZ_69-80	LAMP2_133-144	-0.0123	0.9602	0
LYZ_69-80	LAMP2_145-152	0.5912	0.0077	0
LYZ_69-80	LAMP2_153-161	-0.2123	0.3829	0
LYZ_69-80	LAMP2_281-289	-0.0018	0.9943	0
FUCA1_114-130	Age	0.1567	0.5218	0
FUCA1_114-130	T-tau (ng/L)	0.2002	0.4113	0
FUCA1_114-130	Aβ1-42 (ng/L)	0.0167	0.946	0
FUCA1_114-130	P-tau (ng/L)	0.1649	0.4999	0
FUCA1_114-130	AP2B1_712-719	0.4842	0.0357	0
FUCA1_114-130	AP2B1_835-842	0.5561	0.0134	0
FUCA1_114-130	AP2B1_868-878	0.2143	0.6445	0
FUCA1_114-130	APP_289-301	0.3175	0.1852	0
FUCA1_114-130	APP_439-450	0.3807	0.1078	0
FUCA1_114-130	BSA_421-433	0.3526	0.1387	0
FUCA1_114-130	C9_146-154	0.4684	0.0431	0
FUCA1_114-130	C9_186-194	0.4474	0.0548	0
FUCA1_114-130	C9_232-242	0.5281	0.0201	0
FUCA1_114-130	C9_473-483	0.4947	0.0313	0
FUCA1_114-130	C9_497-508	0.4667	0.044	0
FUCA1_114-130	CTSB_58-71	0.1684	0.4907	0
FUCA1_114-130	CTSB_80-87	0.3175	0.1852	0
FUCA1_114-130	CTSB_210-220	0.1596	0.5138	0
FUCA1_114-130	CTSD_55-72	0.3456	0.1472	0
FUCA1_114-130	CTSD_112-122	0.3105	0.1957	0
FUCA1_114-130	CTSD_349-357	0.1719	0.4815	0
FUCA1_114-130	CatF_103-116	0.2632	0.2764	0
FUCA1_114-130	CatF_236-245	0.1754	0.4725	0
FUCA1_114-130	CatF_266-278	0.3772	0.1114	0
FUCA1_114-130	CatF_442-450	0.1	0.6838	0
FUCA1_114-130	CTSL_105-116	0.4088	0.0823	0
FUCA1_114-130	CTSZ_39-47	-0.0018	0.9943	0
FUCA1_114-130	CTSZ_261-270	0.2	0.4117	0
FUCA1_114-130	DPP7_40-47	0.3421	0.1517	0
FUCA1_114-130	DPP7_113-123	0.1842	0.4503	0
FUCA1_114-130	DPP7_449-462	0.3404	0.1539	0
FUCA1_114-130	GM2A_89-96	0.5667	0.0114	0
FUCA1_114-130	GM2A_170-179	0.2088	0.391	0
FUCA1_114-130	HEXB_285-300	0.2632	0.2764	0
FUCA1_114-130	HEXB_391-400	0.3175	0.1852	0
FUCA1_114-130	LAMP1_138-146	0.3474	0.1451	0
FUCA1_114-130	LAMP1_327-337	0.3684	0.1206	0
FUCA1_114-130	LAMP1_357-363	0.3825	0.1061	0
FUCA1_114-130	LAMP2_133-144	0.2404	0.3216	0
FUCA1_114-130	LAMP2_145-152	0.5386	0.0174	0
FUCA1_114-130	LAMP2_153-161	0.3053	0.2038	0
FUCA1_114-130	LAMP2_281-289	0.2088	0.391	0
FUCA1_114-130	LYZ_52-59	0.307	0.2011	0
FUCA1_114-130	LYZ_69-80	0.3719	0.1169	0
FUCA1_163-173	Age	0.2095	0.3893	0
FUCA1_163-173	T-tau (ng/L)	0.2116	0.3845	0
FUCA1_163-173	Aβ1-42 (ng/L)	0.0588	0.8109	0
FUCA1_163-173	P-tau (ng/L)	0.1534	0.5306	0
FUCA1_163-173	AP2B1_712-719	0.4491	0.0537	0
FUCA1_163-173	AP2B1_835-842	0.5053	0.0273	0
FUCA1_163-173	AP2B1_868-878	0.1429	0.7599	0
FUCA1_163-173	APP_289-301	0.3088	0.1984	0
FUCA1_163-173	APP_439-450	0.3719	0.1169	0
FUCA1_163-173	BSA_421-433	0.3158	0.1878	0
FUCA1_163-173	C9_146-154	0.4947	0.0313	0
FUCA1_163-173	C9_186-194	0.4719	0.0413	0
FUCA1_163-173	C9_232-242	0.5298	0.0196	0
FUCA1_163-173	C9_473-483	0.4895	0.0334	0
FUCA1_163-173	C9_497-508	0.4684	0.0431	0
FUCA1_163-173	CTSB_58-71	0.1579	0.5185	0
FUCA1_163-173	CTSB_80-87	0.3246	0.1752	0
FUCA1_163-173	CTSB_210-220	0.1737	0.477	0
FUCA1_163-173	CTSD_55-72	0.2895	0.2293	0
FUCA1_163-173	CTSD_112-122	0.2439	0.3144	0
FUCA1_163-173	CTSD_349-357	0.1351	0.5814	0
FUCA1_163-173	CatF_103-116	0.2088	0.391	0
FUCA1_163-173	CatF_236-245	0.1561	0.5233	0
FUCA1_163-173	CatF_266-278	0.3018	0.2093	0
FUCA1_163-173	CatF_442-450	0.0561	0.8194	0
FUCA1_163-173	CTSL_105-116	0.3632	0.1265	0
FUCA1_163-173	CTSZ_39-47	0.0018	0.9943	0
FUCA1_163-173	CTSZ_261-270	0.1754	0.4725	0
FUCA1_163-173	DPP7_40-47	0.3228	0.1777	0
FUCA1_163-173	DPP7_113-123	0.1456	0.552	0
FUCA1_163-173	DPP7_449-462	0.3105	0.1957	0
FUCA1_163-173	GM2A_89-96	0.5789	0.0094	0
FUCA1_163-173	GM2A_170-179	0.2228	0.3592	0
FUCA1_163-173	HEXB_285-300	0.2018	0.4075	0
FUCA1_163-173	HEXB_391-400	0.2895	0.2293	0
FUCA1_163-173	LAMP1_138-146	0.3702	0.1188	0
FUCA1_163-173	LAMP1_327-337	0.3561	0.1345	0
FUCA1_163-173	LAMP1_357-363	0.3649	0.1245	0
FUCA1_163-173	LAMP2_133-144	0.2263	0.3515	0
FUCA1_163-173	LAMP2_145-152	0.5158	0.0238	0
FUCA1_163-173	LAMP2_153-161	0.2807	0.2444	0
FUCA1_163-173	LAMP2_281-289	0.1702	0.4861	0
FUCA1_163-173	LYZ_52-59	0.3421	0.1517	0
FUCA1_163-173	LYZ_69-80	0.393	0.096	0
FUCA1_344-354	Age	0.2386	0.3253	0
FUCA1_344-354	T-tau (ng/L)	0.1615	0.5088	0
FUCA1_344-354	Aβ1-42 (ng/L)	0.1563	0.5229	0
FUCA1_344-354	P-tau (ng/L)	0.149	0.5426	0
FUCA1_344-354	AP2B1_712-719	0.5158	0.0238	0
FUCA1_344-354	AP2B1_835-842	0.5719	0.0105	0
FUCA1_344-354	AP2B1_868-878	0.2143	0.6445	0
FUCA1_344-354	APP_289-301	0.2579	0.2864	0
FUCA1_344-354	APP_439-450	0.3	0.2121	0
FUCA1_344-354	BSA_421-433	0.4754	0.0397	0
FUCA1_344-354	C9_146-154	0.5596	0.0127	0
FUCA1_344-354	C9_186-194	0.507	0.0267	0
FUCA1_344-354	C9_232-242	0.6263	0.0041	0
FUCA1_344-354	C9_473-483	0.5491	0.0149	0
FUCA1_344-354	C9_497-508	0.5368	0.0178	0
FUCA1_344-354	CTSB_58-71	0.1088	0.6576	0
FUCA1_344-354	CTSB_80-87	0.2825	0.2413	0
FUCA1_344-354	CTSB_210-220	0.1544	0.528	0
FUCA1_344-354	CTSD_55-72	0.3456	0.1472	0
FUCA1_344-354	CTSD_112-122	0.3421	0.1517	0
FUCA1_344-354	CTSD_349-357	0.1579	0.5185	0
FUCA1_344-354	CatF_103-116	0.3947	0.0944	0
FUCA1_344-354	CatF_236-245	0.3439	0.1494	0
FUCA1_344-354	CatF_266-278	0.4316	0.065	0
FUCA1_344-354	CatF_442-450	0.2211	0.3631	0
FUCA1_344-354	CTSL_105-116	0.3982	0.0913	0
FUCA1_344-354	CTSZ_39-47	0.0895	0.7157	0
FUCA1_344-354	CTSZ_261-270	0.2526	0.2967	0
FUCA1_344-354	DPP7_40-47	0.3456	0.1472	0
FUCA1_344-354	DPP7_113-123	0.1298	0.5963	0
FUCA1_344-354	DPP7_449-462	0.3667	0.1226	0
FUCA1_344-354	GM2A_89-96	0.6474	0.0027	0
FUCA1_344-354	GM2A_170-179	0.2877	0.2323	0
FUCA1_344-354	HEXB_285-300	0.2123	0.3829	0
FUCA1_344-354	HEXB_391-400	0.3351	0.1608	0
FUCA1_344-354	LAMP1_138-146	0.3509	0.1408	0
FUCA1_344-354	LAMP1_327-337	0.286	0.2353	0
FUCA1_344-354	LAMP1_357-363	0.3702	0.1188	0
FUCA1_344-354	LAMP2_133-144	0.2456	0.3108	0
FUCA1_344-354	LAMP2_145-152	0.5877	0.0081	0
FUCA1_344-354	LAMP2_153-161	0.293	0.2235	0
FUCA1_344-354	LAMP2_281-289	0.1649	0.4999	0
FUCA1_344-354	LYZ_52-59	0.4263	0.0687	0
FUCA1_344-354	LYZ_69-80	0.4649	0.0449	0
TCN2_45-59	Age	-0.0114	0.9629	0
TCN2_45-59	T-tau (ng/L)	0.1493	0.542	0
TCN2_45-59	Aβ1-42 (ng/L)	0.1089	0.6573	0
TCN2_45-59	P-tau (ng/L)	0.4171	0.0756	0
TCN2_45-59	AP2B1_712-719	0.314	0.1904	0
TCN2_45-59	AP2B1_835-842	0.3912	0.0977	0
TCN2_45-59	AP2B1_868-878	-0.25	0.5887	0
TCN2_45-59	APP_289-301	0.3667	0.1226	0
TCN2_45-59	APP_439-450	0.3491	0.1429	0
TCN2_45-59	BSA_421-433	-0.0193	0.9375	0
TCN2_45-59	C9_146-154	-0.0561	0.8194	0
TCN2_45-59	C9_186-194	0.0333	0.8922	0
TCN2_45-59	C9_232-242	0.0965	0.6943	0
TCN2_45-59	C9_473-483	0.0982	0.6891	0
TCN2_45-59	C9_497-508	-0.0544	0.825	0
TCN2_45-59	CTSB_58-71	0.0439	0.8585	0
TCN2_45-59	CTSB_80-87	0.1298	0.5963	0
TCN2_45-59	CTSB_210-220	0.0404	0.8697	0
TCN2_45-59	CTSD_55-72	0.0105	0.9659	0
TCN2_45-59	CTSD_112-122	-0.0842	0.7318	0
TCN2_45-59	CTSD_349-357	-0.207	0.3951	0
TCN2_45-59	CatF_103-116	0.0298	0.9035	0
TCN2_45-59	CatF_236-245	-0.1789	0.4636	0
TCN2_45-59	CatF_266-278	0.0456	0.8529	0
TCN2_45-59	CatF_442-450	0.1018	0.6785	0
TCN2_45-59	CTSL_105-116	0.1105	0.6524	0
TCN2_45-59	CTSZ_39-47	0.314	0.1904	0
TCN2_45-59	CTSZ_261-270	-0.0211	0.9318	0
TCN2_45-59	DPP7_40-47	0.1368	0.5764	0
TCN2_45-59	DPP7_113-123	0.1333	0.5863	0
TCN2_45-59	DPP7_449-462	0.014	0.9545	0
TCN2_45-59	GM2A_89-96	0.2474	0.3072	0
TCN2_45-59	GM2A_170-179	0.5105	0.0255	0
TCN2_45-59	HEXB_285-300	0.1281	0.6013	0
TCN2_45-59	HEXB_391-400	0.2614	0.2797	0
TCN2_45-59	LAMP1_138-146	0.1368	0.5764	0
TCN2_45-59	LAMP1_327-337	0.0947	0.6997	0
TCN2_45-59	LAMP1_357-363	0.2404	0.3216	0
TCN2_45-59	LAMP2_133-144	0.286	0.2353	0
TCN2_45-59	LAMP2_145-152	0.0842	0.7318	0
TCN2_45-59	LAMP2_153-161	0.2684	0.2665	0
TCN2_45-59	LAMP2_281-289	0.2053	0.3992	0
TCN2_45-59	LYZ_52-59	-0.0649	0.7918	0
TCN2_45-59	LYZ_69-80	0.1456	0.552	0
TCN2_45-59	FUCA1_114-130	0.007	0.9773	0
TCN2_45-59	FUCA1_163-173	-0.0246	0.9205	0
TCN2_45-59	FUCA1_344-354	0.0421	0.8641	0
TCN2_300-313	Age	0.228	0.3478	0
TCN2_300-313	T-tau (ng/L)	0.1615	0.5088	0
TCN2_300-313	Aβ1-42 (ng/L)	0.0158	0.9488	0
TCN2_300-313	P-tau (ng/L)	0.3571	0.1333	0
TCN2_300-313	AP2B1_712-719	0.4105	0.0808	0
TCN2_300-313	AP2B1_835-842	0.5123	0.0249	0
TCN2_300-313	AP2B1_868-878	-0.2857	0.5345	0
TCN2_300-313	APP_289-301	0.4263	0.0687	0
TCN2_300-313	APP_439-450	0.4614	0.0468	0
TCN2_300-313	BSA_421-433	0.0754	0.7589	0
TCN2_300-313	C9_146-154	0.2526	0.2967	0
TCN2_300-313	C9_186-194	0.3123	0.193	0
TCN2_300-313	C9_232-242	0.3965	0.0928	0
TCN2_300-313	C9_473-483	0.3789	0.1096	0
TCN2_300-313	C9_497-508	0.2491	0.3037	0
TCN2_300-313	CTSB_58-71	0.214	0.3789	0
TCN2_300-313	CTSB_80-87	0.2561	0.2898	0
TCN2_300-313	CTSB_210-220	0.2211	0.3631	0
TCN2_300-313	CTSD_55-72	0.1018	0.6785	0
TCN2_300-313	CTSD_112-122	0.0228	0.9262	0
TCN2_300-313	CTSD_349-357	-0.107	0.6628	0
TCN2_300-313	CatF_103-116	0.0474	0.8473	0
TCN2_300-313	CatF_236-245	-0.1351	0.5814	0
TCN2_300-313	CatF_266-278	0.0737	0.7643	0
TCN2_300-313	CatF_442-450	0.093	0.705	0
TCN2_300-313	CTSL_105-116	0.2	0.4117	0
TCN2_300-313	CTSZ_39-47	0.2789	0.2475	0
TCN2_300-313	CTSZ_261-270	0.1035	0.6733	0
TCN2_300-313	DPP7_40-47	0.2281	0.3477	0
TCN2_300-313	DPP7_113-123	0.1579	0.5185	0
TCN2_300-313	DPP7_449-462	0.0737	0.7643	0
TCN2_300-313	GM2A_89-96	0.4754	0.0397	0
TCN2_300-313	GM2A_170-179	0.5965	0.007	0
TCN2_300-313	HEXB_285-300	0.1351	0.5814	0
TCN2_300-313	HEXB_391-400	0.3193	0.1827	0
TCN2_300-313	LAMP1_138-146	0.386	0.1027	0
TCN2_300-313	LAMP1_327-337	0.3404	0.1539	0
TCN2_300-313	LAMP1_357-363	0.4175	0.0753	0
TCN2_300-313	LAMP2_133-144	0.3105	0.1957	0
TCN2_300-313	LAMP2_145-152	0.3368	0.1585	0
TCN2_300-313	LAMP2_153-161	0.2263	0.3515	0
TCN2_300-313	LAMP2_281-289	0.1965	0.4201	0
TCN2_300-313	LYZ_52-59	0.1667	0.4953	0
TCN2_300-313	LYZ_69-80	0.3965	0.0928	0
TCN2_300-313	FUCA1_114-130	0.3105	0.1957	0
TCN2_300-313	FUCA1_163-173	0.3018	0.2093	0
TCN2_300-313	FUCA1_344-354	0.3158	0.1878	0
TCN2_393-399	Age	-0.0079	0.9743	0
TCN2_393-399	T-tau (ng/L)	-0.0922	0.7074	0
TCN2_393-399	Aβ1-42 (ng/L)	-0.0026	0.9915	0
TCN2_393-399	P-tau (ng/L)	0.3034	0.2068	0
TCN2_393-399	AP2B1_712-719	0.5193	0.0227	0
TCN2_393-399	AP2B1_835-842	0.4579	0.0487	0
TCN2_393-399	AP2B1_868-878	-0.3571	0.4316	0
TCN2_393-399	APP_289-301	0.6123	0.0053	0
TCN2_393-399	APP_439-450	0.6386	0.0033	0
TCN2_393-399	BSA_421-433	0.2789	0.2475	0
TCN2_393-399	C9_146-154	-0.007	0.9773	0
TCN2_393-399	C9_186-194	-0.0298	0.9035	0
TCN2_393-399	C9_232-242	0.0368	0.881	0
TCN2_393-399	C9_473-483	0.0719	0.7698	0
TCN2_393-399	C9_497-508	-0.0404	0.8697	0
TCN2_393-399	CTSB_58-71	-0.2421	0.318	0
TCN2_393-399	CTSB_80-87	0.0772	0.7534	0
TCN2_393-399	CTSB_210-220	-0.186	0.4459	0
TCN2_393-399	CTSD_55-72	0.0439	0.8585	0
TCN2_393-399	CTSD_112-122	0.0333	0.8922	0
TCN2_393-399	CTSD_349-357	-0.0667	0.7863	0
TCN2_393-399	CatF_103-116	0.2211	0.3631	0
TCN2_393-399	CatF_236-245	0.0158	0.9488	0
TCN2_393-399	CatF_266-278	0.2368	0.3289	0
TCN2_393-399	CatF_442-450	0.2561	0.2898	0
TCN2_393-399	CTSL_105-116	0.2263	0.3515	0
TCN2_393-399	CTSZ_39-47	0.0772	0.7534	0
TCN2_393-399	CTSZ_261-270	0.0386	0.8753	0
TCN2_393-399	DPP7_40-47	0.2474	0.3072	0
TCN2_393-399	DPP7_113-123	0.0807	0.7426	0
TCN2_393-399	DPP7_449-462	0.1088	0.6576	0
TCN2_393-399	GM2A_89-96	0.3632	0.1265	0
TCN2_393-399	GM2A_170-179	0.214	0.3789	0
TCN2_393-399	HEXB_285-300	0.1509	0.5375	0
TCN2_393-399	HEXB_391-400	0.314	0.1904	0
TCN2_393-399	LAMP1_138-146	0	1	0
TCN2_393-399	LAMP1_327-337	0.0474	0.8473	0
TCN2_393-399	LAMP1_357-363	0.3105	0.1957	0
TCN2_393-399	LAMP2_133-144	0.4386	0.0603	0
TCN2_393-399	LAMP2_145-152	0.2035	0.4034	0
TCN2_393-399	LAMP2_153-161	0.2895	0.2293	0
TCN2_393-399	LAMP2_281-289	0.3526	0.1387	0
TCN2_393-399	LYZ_52-59	0.1649	0.4999	0
TCN2_393-399	LYZ_69-80	0.2561	0.2898	0
TCN2_393-399	FUCA1_114-130	0.3667	0.1226	0
TCN2_393-399	FUCA1_163-173	0.3351	0.1608	0
TCN2_393-399	FUCA1_344-354	0.3404	0.1539	0
TCN2_393-399	TCN2_45-59	0.693	0.001	0
TCN2_393-399	TCN2_300-313	0.7018	0.0008	0
TPP1_61-78	Age	0.3248	0.1748	0
TPP1_61-78	T-tau (ng/L)	-0.0623	0.7999	0
TPP1_61-78	Aβ1-42 (ng/L)	0.0957	0.6967	0
TPP1_61-78	P-tau (ng/L)	0.1543	0.5282	0
TPP1_61-78	AP2B1_712-719	0.4667	0.044	0
TPP1_61-78	AP2B1_835-842	0.5877	0.0081	0
TPP1_61-78	AP2B1_868-878	0.0714	0.879	0
TPP1_61-78	APP_289-301	0.4982	0.0299	0
TPP1_61-78	APP_439-450	0.5	0.0293	0
TPP1_61-78	BSA_421-433	0.6667	0.0018	0
TPP1_61-78	C9_146-154	0.0754	0.7589	0
TPP1_61-78	C9_186-194	0.014	0.9545	0
TPP1_61-78	C9_232-242	0.2018	0.4075	0
TPP1_61-78	C9_473-483	0.2667	0.2698	0
TPP1_61-78	C9_497-508	0.2368	0.3289	0
TPP1_61-78	CTSB_58-71	0.4404	0.0592	0
TPP1_61-78	CTSB_80-87	0.0491	0.8417	0
TPP1_61-78	CTSB_210-220	0.3	0.2121	0
TPP1_61-78	CatF_103-116	0.6526	0.0025	0
TPP1_61-78	CatF_236-245	0.5772	0.0097	0
TPP1_61-78	CatF_266-278	0.7702	0.0001	0
TPP1_61-78	CatF_442-450	0.6982	0.0009	0
TPP1_61-78	CTSZ_39-47	0.4684	0.0431	0
TPP1_61-78	CTSZ_261-270	0.786	<.0001	0
TPP1_61-78	GM2A_89-96	0.2246	0.3553	0
TPP1_61-78	GM2A_170-179	0.1298	0.5963	0
TPP1_61-78	HEXB_285-300	0.6947	0.001	0
TPP1_61-78	LAMP1_138-146	0.4912	0.0327	0
TPP1_61-78	LAMP1_327-337	0.6263	0.0041	0
TPP1_61-78	LAMP1_357-363	0.6491	0.0026	0
TPP1_61-78	LAMP2_133-144	0.4298	0.0663	0
TPP1_61-78	LAMP2_145-152	0.6175	0.0048	0
TPP1_61-78	LAMP2_153-161	0.3789	0.1096	0
TPP1_61-78	LAMP2_281-289	0.6175	0.0048	0
TPP1_61-78	LYZ_52-59	-0.0754	0.7589	0
TPP1_61-78	LYZ_69-80	0.1	0.6838	0
TPP1_61-78	FUCA1_114-130	0.2474	0.3072	0
TPP1_61-78	FUCA1_163-173	0.1965	0.4201	0
TPP1_61-78	FUCA1_344-354	0.2807	0.2444	0
TPP1_61-78	TCN2_45-59	0.1456	0.552	0
TPP1_61-78	TCN2_300-313	0.1789	0.4636	0
TPP1_61-78	TCN2_393-399	0.1386	0.5715	0
TPP1_246-259	Age	0.2623	0.2779	0
TPP1_246-259	T-tau (ng/L)	-0.0448	0.8556	0
TPP1_246-259	Aβ1-42 (ng/L)	-0.0808	0.7424	0
TPP1_246-259	P-tau (ng/L)	0.0617	0.8018	0
TPP1_246-259	AP2B1_712-719	0.5526	0.0141	0
TPP1_246-259	AP2B1_835-842	0.6193	0.0047	0
TPP1_246-259	AP2B1_868-878	0.25	0.5887	0
TPP1_246-259	APP_289-301	0.5404	0.0169	0
TPP1_246-259	APP_439-450	0.5404	0.0169	0
TPP1_246-259	BSA_421-433	0.6684	0.0018	0
TPP1_246-259	C9_146-154	0.2772	0.2506	0
TPP1_246-259	C9_186-194	0.1947	0.4243	0
TPP1_246-259	C9_232-242	0.3158	0.1878	0
TPP1_246-259	C9_473-483	0.4105	0.0808	0
TPP1_246-259	C9_497-508	0.3825	0.1061	0
TPP1_246-259	CTSB_58-71	0.3789	0.1096	0
TPP1_246-259	CTSB_80-87	0.0123	0.9602	0
TPP1_246-259	CTSB_210-220	0.3246	0.1752	0
TPP1_246-259	CatF_103-116	0.7281	0.0004	0
TPP1_246-259	CatF_236-245	0.6474	0.0027	0
TPP1_246-259	CatF_266-278	0.786	<.0001	0
TPP1_246-259	CatF_442-450	0.7526	0.0002	0
TPP1_246-259	CTSZ_39-47	0.3579	0.1325	0
TPP1_246-259	CTSZ_261-270	0.7175	0.0005	0
TPP1_246-259	DPP7_113-123	0.7088	0.0007	0
TPP1_246-259	GM2A_89-96	0.1982	0.4159	0
TPP1_246-259	GM2A_170-179	-0.0421	0.8641	0
TPP1_246-259	HEXB_285-300	0.7263	0.0004	0
TPP1_246-259	LAMP1_138-146	0.5	0.0293	0
TPP1_246-259	LAMP1_327-337	0.5965	0.007	0
TPP1_246-259	LAMP1_357-363	0.6667	0.0018	0
TPP1_246-259	LAMP2_133-144	0.4298	0.0663	0
TPP1_246-259	LAMP2_145-152	0.6947	0.001	0
TPP1_246-259	LAMP2_153-161	0.2842	0.2383	0
TPP1_246-259	LAMP2_281-289	0.6175	0.0048	0
TPP1_246-259	LYZ_52-59	-0.0211	0.9318	0
TPP1_246-259	LYZ_69-80	0.0842	0.7318	0
TPP1_246-259	FUCA1_114-130	0.3246	0.1752	0
TPP1_246-259	FUCA1_163-173	0.2877	0.2323	0
TPP1_246-259	FUCA1_344-354	0.3281	0.1703	0
TPP1_246-259	TCN2_45-59	-0.1491	0.5423	0
TPP1_246-259	TCN2_300-313	-0.0123	0.9602	0
TPP1_246-259	TCN2_393-399	-0.0123	0.9602	0
TPP1_507-520	Age	0.3856	0.103	0
TPP1_507-520	T-tau (ng/L)	-0.0132	0.9573	0
TPP1_507-520	Aβ1-42 (ng/L)	0.0255	0.9176	0
TPP1_507-520	P-tau (ng/L)	0.1931	0.4283	0
TPP1_507-520	AP2B1_712-719	0.6421	0.003	0
TPP1_507-520	AP2B1_835-842	0.6807	0.0013	0
TPP1_507-520	AP2B1_868-878	0.0357	0.9394	0
TPP1_507-520	APP_289-301	0.5421	0.0165	0
TPP1_507-520	APP_439-450	0.5404	0.0169	0
TPP1_507-520	BSA_421-433	0.7614	0.0002	0
TPP1_507-520	C9_146-154	0.2316	0.3401	0
TPP1_507-520	C9_186-194	0.1368	0.5764	0
TPP1_507-520	C9_232-242	0.3123	0.193	0
TPP1_507-520	C9_473-483	0.3895	0.0993	0
TPP1_507-520	C9_497-508	0.3561	0.1345	0
TPP1_507-520	CTSB_58-71	0.4088	0.0823	0
TPP1_507-520	CTSB_80-87	0.0719	0.7698	0
TPP1_507-520	CTSB_210-220	0.3368	0.1585	0
TPP1_507-520	CatF_103-116	0.7579	0.0002	0
TPP1_507-520	CatF_236-245	0.6842	0.0012	0
TPP1_507-520	CatF_442-450	0.7614	0.0002	0
TPP1_507-520	CTSZ_39-47	0.4193	0.0739	0
TPP1_507-520	DPP7_113-123	0.7053	0.0007	0
TPP1_507-520	GM2A_89-96	0.386	0.1027	0
TPP1_507-520	GM2A_170-179	0.1175	0.6318	0
TPP1_507-520	HEXB_285-300	0.6789	0.0014	0
TPP1_507-520	LAMP1_138-146	0.5368	0.0178	0
TPP1_507-520	LAMP1_327-337	0.5965	0.007	0
TPP1_507-520	LAMP1_357-363	0.6965	0.0009	0
TPP1_507-520	LAMP2_133-144	0.5	0.0293	0
TPP1_507-520	LAMP2_145-152	0.7772	<.0001	0
TPP1_507-520	LAMP2_153-161	0.3596	0.1304	0
TPP1_507-520	LAMP2_281-289	0.6895	0.0011	0
TPP1_507-520	LYZ_52-59	0.1018	0.6785	0
TPP1_507-520	LYZ_69-80	0.2667	0.2698	0
TPP1_507-520	FUCA1_114-130	0.3263	0.1727	0
TPP1_507-520	FUCA1_163-173	0.2807	0.2444	0
TPP1_507-520	FUCA1_344-354	0.3719	0.1169	0
TPP1_507-520	TCN2_45-59	0.0491	0.8417	0
TPP1_507-520	TCN2_300-313	0.1561	0.5233	0
TPP1_507-520	TCN2_393-399	0.1561	0.5233	0
Ubiquitin_12-27	Age	0.2227	0.3594	0
Ubiquitin_12-27	T-tau (ng/L)	-0.0632	0.7971	0
Ubiquitin_12-27	Aβ1-42 (ng/L)	-0.3003	0.2117	0
Ubiquitin_12-27	P-tau (ng/L)	0.209	0.3905	0
Ubiquitin_12-27	AP2B1_835-842	0.7368	0.0003	0
Ubiquitin_12-27	AP2B1_868-878	-0.1429	0.7599	0
Ubiquitin_12-27	APP_289-301	0.4456	0.0559	0
Ubiquitin_12-27	APP_439-450	0.5246	0.0211	0
Ubiquitin_12-27	C9_146-154	0.5649	0.0117	0
Ubiquitin_12-27	C9_186-194	0.4544	0.0507	0
Ubiquitin_12-27	C9_232-242	0.5719	0.0105	0
Ubiquitin_12-27	C9_473-483	0.6912	0.001	0
Ubiquitin_12-27	C9_497-508	0.6228	0.0044	0
Ubiquitin_12-27	CTSB_58-71	-0.0368	0.881	0
Ubiquitin_12-27	CTSB_80-87	0.1	0.6838	0
Ubiquitin_12-27	CTSB_210-220	0.1158	0.6369	0
Ubiquitin_12-27	CTSD_55-72	0.4632	0.0458	0
Ubiquitin_12-27	CTSD_112-122	0.5561	0.0134	0
Ubiquitin_12-27	CTSD_349-357	0.2702	0.2633	0
Ubiquitin_12-27	CatF_103-116	0.7702	0.0001	0
Ubiquitin_12-27	CatF_236-245	0.6193	0.0047	0
Ubiquitin_12-27	CatF_266-278	0.7123	0.0006	0
Ubiquitin_12-27	CatF_442-450	0.6684	0.0018	0
Ubiquitin_12-27	CTSL_105-116	0.5281	0.0201	0
Ubiquitin_12-27	CTSZ_39-47	0.2053	0.3992	0
Ubiquitin_12-27	CTSZ_261-270	0.5158	0.0238	0
Ubiquitin_12-27	DPP7_40-47	0.4404	0.0592	0
Ubiquitin_12-27	DPP7_113-123	0.2333	0.3364	0
Ubiquitin_12-27	DPP7_449-462	0.4088	0.0823	0
Ubiquitin_12-27	GM2A_89-96	0.693	0.001	0
Ubiquitin_12-27	GM2A_170-179	-0.0737	0.7643	0
Ubiquitin_12-27	HEXB_285-300	0.3807	0.1078	0
Ubiquitin_12-27	HEXB_391-400	0.4491	0.0537	0
Ubiquitin_12-27	LAMP1_138-146	0.286	0.2353	0
Ubiquitin_12-27	LAMP1_327-337	0.3649	0.1245	0
Ubiquitin_12-27	LAMP1_357-363	0.6316	0.0037	0
Ubiquitin_12-27	LAMP2_133-144	0.2947	0.2206	0
Ubiquitin_12-27	LAMP2_145-152	0.7526	0.0002	0
Ubiquitin_12-27	LAMP2_153-161	0.0351	0.8866	0
Ubiquitin_12-27	LAMP2_281-289	0.4018	0.0882	0
Ubiquitin_12-27	LYZ_52-59	0.5614	0.0124	0
Ubiquitin_12-27	LYZ_69-80	0.6614	0.002	0
Ubiquitin_12-27	FUCA1_114-130	0.5368	0.0178	0
Ubiquitin_12-27	FUCA1_163-173	0.5123	0.0249	0
Ubiquitin_12-27	FUCA1_344-354	0.5737	0.0102	0
Ubiquitin_12-27	TCN2_45-59	0.0228	0.9262	0
Ubiquitin_12-27	TCN2_300-313	0.2053	0.3992	0
Ubiquitin_12-27	TCN2_393-399	0.414	0.078	0
Ubiquitin_12-27	TPP1_61-78	0.4035	0.0867	0
Ubiquitin_12-27	TPP1_246-259	0.5421	0.0165	0
Ubiquitin_12-27	TPP1_507-520	0.6	0.0066	0
Ubiquitin_64-72	Age	0.1065	0.6643	0
Ubiquitin_64-72	T-tau (ng/L)	0.0176	0.9431	0
Ubiquitin_64-72	Aβ1-42 (ng/L)	-0.4056	0.0849	0
Ubiquitin_64-72	P-tau (ng/L)	0.3369	0.1585	0
Ubiquitin_64-72	AP2B1_712-719	0.7667	0.0001	0
Ubiquitin_64-72	AP2B1_835-842	0.6965	0.0009	0
Ubiquitin_64-72	AP2B1_868-878	0.0714	0.879	0
Ubiquitin_64-72	APP_289-301	0.407	0.0837	0
Ubiquitin_64-72	APP_439-450	0.4842	0.0357	0
Ubiquitin_64-72	BSA_421-433	0.7316	0.0004	0
Ubiquitin_64-72	C9_146-154	0.4421	0.0581	0
Ubiquitin_64-72	C9_186-194	0.3316	0.1655	0
Ubiquitin_64-72	C9_232-242	0.4667	0.044	0
Ubiquitin_64-72	C9_473-483	0.5614	0.0124	0
Ubiquitin_64-72	C9_497-508	0.4965	0.0306	0
Ubiquitin_64-72	CTSB_58-71	-0.0509	0.8361	0
Ubiquitin_64-72	CTSB_80-87	0.2193	0.367	0
Ubiquitin_64-72	CTSB_210-220	0.0965	0.6943	0
Ubiquitin_64-72	CTSD_55-72	0.3579	0.1325	0
Ubiquitin_64-72	CTSD_112-122	0.4509	0.0527	0
Ubiquitin_64-72	CTSD_349-357	0.1772	0.468	0
Ubiquitin_64-72	CatF_103-116	0.6912	0.001	0
Ubiquitin_64-72	CatF_236-245	0.4719	0.0413	0
Ubiquitin_64-72	CatF_266-278	0.6404	0.0031	0
Ubiquitin_64-72	CatF_442-450	0.5596	0.0127	0
Ubiquitin_64-72	CTSL_105-116	0.4123	0.0794	0
Ubiquitin_64-72	CTSZ_39-47	0.0825	0.7372	0
Ubiquitin_64-72	CTSZ_261-270	0.3982	0.0913	0
Ubiquitin_64-72	DPP7_40-47	0.2702	0.2633	0
Ubiquitin_64-72	DPP7_113-123	0.0386	0.8753	0
Ubiquitin_64-72	DPP7_449-462	0.2439	0.3144	0
Ubiquitin_64-72	GM2A_89-96	0.6439	0.0029	0
Ubiquitin_64-72	GM2A_170-179	-0.0298	0.9035	0
Ubiquitin_64-72	HEXB_285-300	0.3632	0.1265	0
Ubiquitin_64-72	HEXB_391-400	0.3421	0.1517	0
Ubiquitin_64-72	LAMP1_138-146	0.1509	0.5375	0
Ubiquitin_64-72	LAMP1_327-337	0.2614	0.2797	0
Ubiquitin_64-72	LAMP1_357-363	0.5368	0.0178	0
Ubiquitin_64-72	LAMP2_133-144	0.3719	0.1169	0
Ubiquitin_64-72	LAMP2_145-152	0.6105	0.0055	0
Ubiquitin_64-72	LAMP2_153-161	0.0509	0.8361	0
Ubiquitin_64-72	LAMP2_281-289	0.4421	0.0581	0
Ubiquitin_64-72	LYZ_52-59	0.4737	0.0405	0
Ubiquitin_64-72	LYZ_69-80	0.5088	0.0261	0
Ubiquitin_64-72	FUCA1_114-130	0.5509	0.0145	0
Ubiquitin_64-72	FUCA1_163-173	0.5018	0.0286	0
Ubiquitin_64-72	FUCA1_344-354	0.5579	0.0131	0
Ubiquitin_64-72	TCN2_45-59	0.0333	0.8922	0
Ubiquitin_64-72	TCN2_300-313	0.1509	0.5375	0
Ubiquitin_64-72	TCN2_393-399	0.4526	0.0517	0
Ubiquitin_64-72	TPP1_61-78	0.2561	0.2898	0
Ubiquitin_64-72	TPP1_246-259	0.4088	0.0823	0
Ubiquitin_64-72	TPP1_507-520	0.4491	0.0537	0

## Sheet: Pilot Study Control
Table S4. Spearman's correlation in the Control group of the Pilot Study (N = 24).
Variable	by Variable	Spearman ρ	Prob>|ρ|	Correlation (True = 1, False = 0)
P-tau (ng/L)	T-tau (ng/L)	0.8424	<.0001	1
AP2B1_712-719	P-tau (ng/L)	0.8318	<.0001	1
AP2B1_835-842	AP2B1_712-719	0.9522	<.0001	1
APP_439-450	APP_289-301	0.9122	<.0001	1
C9_186-194	C9_146-154	0.9435	<.0001	1
C9_232-242	C9_146-154	0.9165	<.0001	1
C9_232-242	C9_186-194	0.9513	<.0001	1
C9_473-483	C9_146-154	0.8983	<.0001	1
C9_473-483	C9_186-194	0.9148	<.0001	1
C9_473-483	C9_232-242	0.9435	<.0001	1
C9_497-508	C9_146-154	0.8704	<.0001	1
C9_497-508	C9_186-194	0.92	<.0001	1
C9_497-508	C9_232-242	0.9287	<.0001	1
C9_497-508	C9_473-483	0.9661	<.0001	1
CTSD_349-357	CTSD_112-122	0.8843	<.0001	1
CatF_236-245	CatF_103-116	0.9391	<.0001	1
CatF_266-278	CatF_103-116	0.9496	<.0001	1
CatF_266-278	CatF_236-245	0.9148	<.0001	1
CatF_442-450	CatF_103-116	0.8522	<.0001	1
CTSL_105-116	APP_439-450	0.8165	<.0001	1
CTSZ_261-270	CTSZ_39-47	0.8617	<.0001	1
DPP7_40-47	CTSL_105-116	0.8183	<.0001	1
DPP7_113-123	DPP7_40-47	0.9078	<.0001	1
DPP7_449-462	CTSL_105-116	0.8287	<.0001	1
DPP7_449-462	DPP7_40-47	0.9061	<.0001	1
DPP7_449-462	DPP7_113-123	0.867	<.0001	1
GM2A_89-96	AP2B1_712-719	0.8713	<.0001	1
GM2A_89-96	AP2B1_835-842	0.8565	<.0001	1
HEXB_285-300	CTSL_105-116	0.8174	<.0001	1
HEXB_285-300	DPP7_40-47	0.8252	<.0001	1
HEXB_285-300	DPP7_113-123	0.8148	<.0001	1
HEXB_391-400	CTSL_105-116	0.8957	<.0001	1
HEXB_391-400	DPP7_40-47	0.807	<.0001	1
HEXB_391-400	HEXB_285-300	0.8748	<.0001	1
LAMP1_327-337	CTSL_105-116	0.8043	<.0001	1
LAMP1_327-337	LAMP1_138-146	0.8348	<.0001	1
LAMP1_357-363	CatF_103-116	0.8487	<.0001	1
LAMP1_357-363	CTSL_105-116	0.8939	<.0001	1
LAMP1_357-363	LAMP1_138-146	0.8565	<.0001	1
LAMP1_357-363	LAMP1_327-337	0.8748	<.0001	1
LAMP2_133-144	AP2B1_868-878	0.8545	0.0016	1
LAMP2_145-152	CatF_103-116	0.8087	<.0001	1
LAMP2_145-152	CatF_266-278	0.8861	<.0001	1
LAMP2_145-152	LAMP1_138-146	0.8583	<.0001	1
LAMP2_145-152	LAMP1_327-337	0.807	<.0001	1
LAMP2_145-152	LAMP1_357-363	0.8435	<.0001	1
LAMP2_153-161	AP2B1_868-878	0.8667	0.0012	1
LAMP2_281-289	AP2B1_868-878	0.8424	0.0022	1
LAMP2_281-289	LAMP2_133-144	0.8443	<.0001	1
LYZ_69-80	LYZ_52-59	0.9078	<.0001	1
FUCA1_163-173	FUCA1_114-130	0.9922	<.0001	1
FUCA1_344-354	FUCA1_114-130	0.9426	<.0001	1
FUCA1_344-354	FUCA1_163-173	0.9557	<.0001	1
TCN2_300-313	TCN2_45-59	0.9026	<.0001	1
TCN2_393-399	TCN2_45-59	0.8391	<.0001	1
TCN2_393-399	TCN2_300-313	0.933	<.0001	1
TPP1_61-78	CTSL_105-116	0.8417	<.0001	1
TPP1_61-78	DPP7_40-47	0.827	<.0001	1
TPP1_61-78	DPP7_113-123	0.8174	<.0001	1
TPP1_61-78	HEXB_285-300	0.8278	<.0001	1
TPP1_61-78	HEXB_391-400	0.8278	<.0001	1
TPP1_246-259	CTSL_105-116	0.8939	<.0001	1
TPP1_246-259	DPP7_40-47	0.8557	<.0001	1
TPP1_246-259	DPP7_113-123	0.82	<.0001	1
TPP1_246-259	HEXB_285-300	0.8652	<.0001	1
TPP1_246-259	HEXB_391-400	0.8791	<.0001	1
TPP1_246-259	TPP1_61-78	0.9096	<.0001	1
TPP1_507-520	CTSL_105-116	0.887	<.0001	1
TPP1_507-520	DPP7_40-47	0.8296	<.0001	1
TPP1_507-520	HEXB_285-300	0.8652	<.0001	1
TPP1_507-520	HEXB_391-400	0.8774	<.0001	1
TPP1_507-520	TPP1_61-78	0.9383	<.0001	1
TPP1_507-520	TPP1_246-259	0.9687	<.0001	1
Ubiquitin_12-27	AP2B1_712-719	0.9017	<.0001	1
Ubiquitin_12-27	AP2B1_835-842	0.8296	<.0001	1
Ubiquitin_64-72	AP2B1_712-719	0.9243	<.0001	1
Ubiquitin_64-72	AP2B1_835-842	0.8626	<.0001	1
Ubiquitin_64-72	Ubiquitin_12-27	0.9783	<.0001	1
T-tau (ng/L)	Age	0.2325	0.2743	0
Aβ1-42 (ng/L)	Age	-0.1082	0.6147	0
Aβ1-42 (ng/L)	T-tau (ng/L)	0.0967	0.6531	0
P-tau (ng/L)	Age	0.1059	0.6223	0
P-tau (ng/L)	Aβ1-42 (ng/L)	0.1365	0.5248	0
AP2B1_712-719	Age	0.2552	0.2287	0
AP2B1_712-719	T-tau (ng/L)	0.6954	0.0002	0
AP2B1_712-719	Aβ1-42 (ng/L)	0.0331	0.8782	0
AP2B1_835-842	Age	0.1915	0.3699	0
AP2B1_835-842	T-tau (ng/L)	0.631	0.0009	0
AP2B1_835-842	Aβ1-42 (ng/L)	0.0805	0.7086	0
AP2B1_835-842	P-tau (ng/L)	0.7974	<.0001	0
AP2B1_868-878	Age	0.2006	0.5784	0
AP2B1_868-878	T-tau (ng/L)	0.0182	0.9602	0
AP2B1_868-878	Aβ1-42 (ng/L)	0.3333	0.3466	0
AP2B1_868-878	P-tau (ng/L)	0.2249	0.5321	0
AP2B1_868-878	AP2B1_712-719	0.6848	0.0289	0
AP2B1_868-878	AP2B1_835-842	0.6	0.0667	0
APP_289-301	Age	0.0563	0.7939	0
APP_289-301	T-tau (ng/L)	0.135	0.5294	0
APP_289-301	Aβ1-42 (ng/L)	0.2261	0.288	0
APP_289-301	P-tau (ng/L)	0.3713	0.0741	0
APP_289-301	AP2B1_712-719	0.5991	0.002	0
APP_289-301	AP2B1_835-842	0.6113	0.0015	0
APP_289-301	AP2B1_868-878	0.5394	0.1076	0
APP_439-450	Age	-0.072	0.7382	0
APP_439-450	T-tau (ng/L)	0.1123	0.6012	0
APP_439-450	Aβ1-42 (ng/L)	0.1374	0.522	0
APP_439-450	P-tau (ng/L)	0.3504	0.0932	0
APP_439-450	AP2B1_712-719	0.527	0.0082	0
APP_439-450	AP2B1_835-842	0.5148	0.0101	0
APP_439-450	AP2B1_868-878	0.2848	0.425	0
BSA_421-433	Age	0.1501	0.4839	0
BSA_421-433	T-tau (ng/L)	0.2238	0.2931	0
BSA_421-433	Aβ1-42 (ng/L)	-0.5866	0.0026	0
BSA_421-433	P-tau (ng/L)	0.2694	0.203	0
BSA_421-433	AP2B1_712-719	0.3974	0.0545	0
BSA_421-433	AP2B1_835-842	0.3287	0.1168	0
BSA_421-433	AP2B1_868-878	-0.2485	0.4888	0
BSA_421-433	APP_289-301	0.233	0.2731	0
BSA_421-433	APP_439-450	0.2652	0.2104	0
C9_146-154	Age	0.3752	0.0708	0
C9_146-154	T-tau (ng/L)	0.4786	0.018	0
C9_146-154	Aβ1-42 (ng/L)	-0.0404	0.8512	0
C9_146-154	P-tau (ng/L)	0.4705	0.0203	0
C9_146-154	AP2B1_712-719	0.1887	0.3772	0
C9_146-154	AP2B1_835-842	0.1583	0.4601	0
C9_146-154	AP2B1_868-878	-0.1879	0.6032	0
C9_146-154	APP_289-301	-0.047	0.8275	0
C9_146-154	APP_439-450	-0.0104	0.9614	0
C9_146-154	BSA_421-433	0.1713	0.4235	0
C9_186-194	Age	0.3647	0.0797	0
C9_186-194	T-tau (ng/L)	0.4642	0.0223	0
C9_186-194	Aβ1-42 (ng/L)	0.0613	0.7759	0
C9_186-194	P-tau (ng/L)	0.4248	0.0385	0
C9_186-194	AP2B1_712-719	0.1209	0.5737	0
C9_186-194	AP2B1_835-842	0.1452	0.4984	0
C9_186-194	AP2B1_868-878	-0.3576	0.3104	0
C9_186-194	APP_289-301	-0.1243	0.5626	0
C9_186-194	APP_439-450	-0.1713	0.4235	0
C9_186-194	BSA_421-433	0.0861	0.6892	0
C9_232-242	Age	0.3656	0.0789	0
C9_232-242	T-tau (ng/L)	0.4777	0.0182	0
C9_232-242	Aβ1-42 (ng/L)	0.0752	0.7268	0
C9_232-242	P-tau (ng/L)	0.4736	0.0194	0
C9_232-242	AP2B1_712-719	0.1948	0.3617	0
C9_232-242	AP2B1_835-842	0.2026	0.3424	0
C9_232-242	AP2B1_868-878	-0.0424	0.9074	0
C9_232-242	APP_289-301	-0.1209	0.5737	0
C9_232-242	APP_439-450	-0.1417	0.5088	0
C9_232-242	BSA_421-433	0.1078	0.616	0
C9_473-483	Age	0.2714	0.1996	0
C9_473-483	T-tau (ng/L)	0.5238	0.0086	0
C9_473-483	Aβ1-42 (ng/L)	-0.0244	0.9101	0
C9_473-483	P-tau (ng/L)	0.5876	0.0025	0
C9_473-483	AP2B1_712-719	0.34	0.104	0
C9_473-483	AP2B1_835-842	0.3539	0.0898	0
C9_473-483	AP2B1_868-878	-0.1394	0.7009	0
C9_473-483	APP_289-301	0.0183	0.9325	0
C9_473-483	APP_439-450	0.0165	0.9389	0
C9_473-483	BSA_421-433	0.2522	0.2345	0
C9_497-508	Age	0.2369	0.265	0
C9_497-508	T-tau (ng/L)	0.5286	0.0079	0
C9_497-508	Aβ1-42 (ng/L)	0.0022	0.992	0
C9_497-508	P-tau (ng/L)	0.5898	0.0024	0
C9_497-508	AP2B1_712-719	0.3113	0.1387	0
C9_497-508	AP2B1_835-842	0.3417	0.1022	0
C9_497-508	AP2B1_868-878	-0.1394	0.7009	0
C9_497-508	APP_289-301	0.0374	0.8623	0
C9_497-508	APP_439-450	-0.0035	0.9871	0
C9_497-508	BSA_421-433	0.293	0.1646	0
CTSB_58-71	Age	-0.3159	0.1327	0
CTSB_58-71	T-tau (ng/L)	-0.0814	0.7052	0
CTSB_58-71	Aβ1-42 (ng/L)	0.1757	0.4115	0
CTSB_58-71	P-tau (ng/L)	0.0749	0.7281	0
CTSB_58-71	AP2B1_712-719	0.0313	0.8845	0
CTSB_58-71	AP2B1_835-842	0.1852	0.3862	0
CTSB_58-71	AP2B1_868-878	0.0545	0.881	0
CTSB_58-71	APP_289-301	0.2557	0.2279	0
CTSB_58-71	APP_439-450	0.3417	0.1022	0
CTSB_58-71	BSA_421-433	-0.0174	0.9357	0
CTSB_58-71	C9_146-154	0.1104	0.6075	0
CTSB_58-71	C9_186-194	0.16	0.4552	0
CTSB_58-71	C9_232-242	0.2452	0.2481	0
CTSB_58-71	C9_473-483	0.3357	0.1088	0
CTSB_58-71	C9_497-508	0.2957	0.1607	0
CTSB_80-87	Age	-0.0654	0.7613	0
CTSB_80-87	T-tau (ng/L)	0.3801	0.0669	0
CTSB_80-87	Aβ1-42 (ng/L)	-0.0035	0.9871	0
CTSB_80-87	P-tau (ng/L)	0.5432	0.0061	0
CTSB_80-87	AP2B1_712-719	0.5417	0.0063	0
CTSB_80-87	AP2B1_835-842	0.6348	0.0009	0
CTSB_80-87	AP2B1_868-878	0.2606	0.4671	0
CTSB_80-87	APP_289-301	0.4713	0.0201	0
CTSB_80-87	APP_439-450	0.4557	0.0252	0
CTSB_80-87	BSA_421-433	0.287	0.174	0
CTSB_80-87	C9_146-154	0.3574	0.0864	0
CTSB_80-87	C9_186-194	0.3583	0.0856	0
CTSB_80-87	C9_232-242	0.3609	0.0832	0
CTSB_80-87	C9_473-483	0.4887	0.0154	0
CTSB_80-87	C9_497-508	0.4617	0.0231	0
CTSB_80-87	CTSB_58-71	0.5322	0.0074	0
CTSB_210-220	Age	-0.0982	0.6481	0
CTSB_210-220	T-tau (ng/L)	0.0035	0.9871	0
CTSB_210-220	Aβ1-42 (ng/L)	0.0013	0.9952	0
CTSB_210-220	P-tau (ng/L)	0.2359	0.2671	0
CTSB_210-220	AP2B1_712-719	0.3391	0.105	0
CTSB_210-220	AP2B1_835-842	0.4417	0.0307	0
CTSB_210-220	AP2B1_868-878	0.3697	0.2931	0
CTSB_210-220	APP_289-301	0.5365	0.0069	0
CTSB_210-220	APP_439-450	0.6113	0.0015	0
CTSB_210-220	BSA_421-433	0.2965	0.1594	0
CTSB_210-220	C9_146-154	0.0887	0.6802	0
CTSB_210-220	C9_186-194	0.0339	0.875	0
CTSB_210-220	C9_232-242	0.1261	0.5572	0
CTSB_210-220	C9_473-483	0.2104	0.3236	0
CTSB_210-220	C9_497-508	0.167	0.4355	0
CTSB_210-220	CTSB_58-71	0.7278	<.0001	0
CTSB_210-220	CTSB_80-87	0.7591	<.0001	0
CTSD_55-72	Age	-0.2692	0.2034	0
CTSD_55-72	T-tau (ng/L)	-0.3318	0.1132	0
CTSD_55-72	Aβ1-42 (ng/L)	-0.1518	0.479	0
CTSD_55-72	P-tau (ng/L)	-0.2577	0.2241	0
CTSD_55-72	AP2B1_712-719	-0.1583	0.4601	0
CTSD_55-72	AP2B1_835-842	-0.0174	0.9357	0
CTSD_55-72	AP2B1_868-878	0.5879	0.0739	0
CTSD_55-72	APP_289-301	0.2009	0.3466	0
CTSD_55-72	APP_439-450	0.2557	0.2279	0
CTSD_55-72	BSA_421-433	0.0826	0.7012	0
CTSD_55-72	C9_146-154	-0.1478	0.4906	0
CTSD_55-72	C9_186-194	-0.1417	0.5088	0
CTSD_55-72	C9_232-242	-0.0417	0.8465	0
CTSD_55-72	C9_473-483	-0.0365	0.8655	0
CTSD_55-72	C9_497-508	-0.0174	0.9357	0
CTSD_55-72	CTSB_58-71	0.427	0.0375	0
CTSD_55-72	CTSB_80-87	0.2278	0.2843	0
CTSD_55-72	CTSB_210-220	0.387	0.0618	0
CTSD_112-122	Age	0.0545	0.8002	0
CTSD_112-122	T-tau (ng/L)	-0.0309	0.886	0
CTSD_112-122	Aβ1-42 (ng/L)	-0.3366	0.1078	0
CTSD_112-122	P-tau (ng/L)	0.2272	0.2857	0
CTSD_112-122	AP2B1_712-719	0.3626	0.0816	0
CTSD_112-122	AP2B1_835-842	0.4278	0.037	0
CTSD_112-122	AP2B1_868-878	0.5152	0.1276	0
CTSD_112-122	APP_289-301	0.3409	0.1031	0
CTSD_112-122	APP_439-450	0.3878	0.0611	0
CTSD_112-122	BSA_421-433	0.533	0.0073	0
CTSD_112-122	C9_146-154	0.1887	0.3772	0
CTSD_112-122	C9_186-194	0.1183	0.5821	0
CTSD_112-122	C9_232-242	0.2017	0.3445	0
CTSD_112-122	C9_473-483	0.3296	0.1158	0
CTSD_112-122	C9_497-508	0.32	0.1274	0
CTSD_112-122	CTSB_58-71	0.267	0.2073	0
CTSD_112-122	CTSB_80-87	0.5043	0.012	0
CTSD_112-122	CTSB_210-220	0.5087	0.0111	0
CTSD_112-122	CTSD_55-72	0.5261	0.0083	0
CTSD_349-357	Age	0.0846	0.6941	0
CTSD_349-357	T-tau (ng/L)	-0.2347	0.2696	0
CTSD_349-357	Aβ1-42 (ng/L)	-0.2087	0.3276	0
CTSD_349-357	P-tau (ng/L)	0.0505	0.8148	0
CTSD_349-357	AP2B1_712-719	0.1539	0.4727	0
CTSD_349-357	AP2B1_835-842	0.2374	0.264	0
CTSD_349-357	AP2B1_868-878	0.5152	0.1276	0
CTSD_349-357	APP_289-301	0.3574	0.0864	0
CTSD_349-357	APP_439-450	0.3313	0.1138	0
CTSD_349-357	BSA_421-433	0.273	0.1967	0
CTSD_349-357	C9_146-154	0.1052	0.6246	0
CTSD_349-357	C9_186-194	0.0522	0.8087	0
CTSD_349-357	C9_232-242	0.1278	0.5517	0
CTSD_349-357	C9_473-483	0.1783	0.4046	0
CTSD_349-357	C9_497-508	0.2078	0.3298	0
CTSD_349-357	CTSB_58-71	0.1704	0.4259	0
CTSD_349-357	CTSB_80-87	0.2965	0.1594	0
CTSD_349-357	CTSB_210-220	0.3565	0.0873	0
CTSD_349-357	CTSD_55-72	0.5704	0.0036	0
CatF_103-116	Age	0.3434	0.1004	0
CatF_103-116	T-tau (ng/L)	0.3963	0.0552	0
CatF_103-116	Aβ1-42 (ng/L)	-0.1078	0.6159	0
CatF_103-116	P-tau (ng/L)	0.5663	0.0039	0
CatF_103-116	AP2B1_712-719	0.72	<.0001	0
CatF_103-116	AP2B1_835-842	0.7426	<.0001	0
CatF_103-116	AP2B1_868-878	0.4303	0.2145	0
CatF_103-116	APP_289-301	0.4774	0.0183	0
CatF_103-116	APP_439-450	0.4678	0.0211	0
CatF_103-116	BSA_421-433	0.4139	0.0444	0
CatF_103-116	C9_146-154	0.4287	0.0366	0
CatF_103-116	C9_186-194	0.367	0.0778	0
CatF_103-116	C9_232-242	0.4461	0.0289	0
CatF_103-116	C9_473-483	0.5983	0.002	0
CatF_103-116	C9_497-508	0.513	0.0104	0
CatF_103-116	CTSB_58-71	0.3896	0.0599	0
CatF_103-116	CTSB_80-87	0.727	<.0001	0
CatF_103-116	CTSB_210-220	0.6087	0.0016	0
CatF_103-116	CTSD_55-72	0.1287	0.549	0
CatF_103-116	CTSD_112-122	0.6635	0.0004	0
CatF_103-116	CTSD_349-357	0.4174	0.0424	0
CatF_236-245	Age	0.3216	0.1255	0
CatF_236-245	T-tau (ng/L)	0.256	0.2272	0
CatF_236-245	Aβ1-42 (ng/L)	-0.1383	0.5193	0
CatF_236-245	P-tau (ng/L)	0.4096	0.0469	0
CatF_236-245	AP2B1_712-719	0.5609	0.0044	0
CatF_236-245	AP2B1_835-842	0.5957	0.0021	0
CatF_236-245	AP2B1_868-878	0.4303	0.2145	0
CatF_236-245	APP_289-301	0.3513	0.0923	0
CatF_236-245	APP_439-450	0.3817	0.0657	0
CatF_236-245	BSA_421-433	0.3643	0.0801	0
CatF_236-245	C9_146-154	0.4017	0.0517	0
CatF_236-245	C9_186-194	0.3087	0.1422	0
CatF_236-245	C9_232-242	0.3913	0.0586	0
CatF_236-245	C9_473-483	0.5043	0.012	0
CatF_236-245	C9_497-508	0.4122	0.0453	0
CatF_236-245	CTSB_58-71	0.4122	0.0453	0
CatF_236-245	CTSB_80-87	0.6774	0.0003	0
CatF_236-245	CTSB_210-220	0.6348	0.0009	0
CatF_236-245	CTSD_55-72	0.1574	0.4626	0
CatF_236-245	CTSD_112-122	0.6217	0.0012	0
CatF_236-245	CTSD_349-357	0.3826	0.065	0
CatF_266-278	Age	0.2949	0.1618	0
CatF_266-278	T-tau (ng/L)	0.344	0.0998	0
CatF_266-278	Aβ1-42 (ng/L)	-0.05	0.8165	0
CatF_266-278	P-tau (ng/L)	0.5815	0.0029	0
CatF_266-278	AP2B1_712-719	0.6417	0.0007	0
CatF_266-278	AP2B1_835-842	0.6783	0.0003	0
CatF_266-278	AP2B1_868-878	0.3576	0.3104	0
CatF_266-278	APP_289-301	0.353	0.0906	0
CatF_266-278	APP_439-450	0.3826	0.065	0
CatF_266-278	BSA_421-433	0.3087	0.1422	0
CatF_266-278	C9_146-154	0.4617	0.0231	0
CatF_266-278	C9_186-194	0.407	0.0484	0
CatF_266-278	C9_232-242	0.5043	0.012	0
CatF_266-278	C9_473-483	0.6504	0.0006	0
CatF_266-278	C9_497-508	0.5435	0.0061	0
CatF_266-278	CTSB_58-71	0.4426	0.0303	0
CatF_266-278	CTSB_80-87	0.6922	0.0002	0
CatF_266-278	CTSB_210-220	0.5765	0.0032	0
CatF_266-278	CTSD_55-72	0.0913	0.6713	0
CatF_266-278	CTSD_112-122	0.6261	0.0011	0
CatF_266-278	CTSD_349-357	0.3939	0.0568	0
CatF_442-450	Age	0.4066	0.0486	0
CatF_442-450	T-tau (ng/L)	0.2617	0.2167	0
CatF_442-450	Aβ1-42 (ng/L)	0.0935	0.6639	0
CatF_442-450	P-tau (ng/L)	0.4096	0.0469	0
CatF_442-450	AP2B1_712-719	0.6583	0.0005	0
CatF_442-450	AP2B1_835-842	0.6843	0.0002	0
CatF_442-450	AP2B1_868-878	0.6606	0.0376	0
CatF_442-450	APP_289-301	0.5948	0.0022	0
CatF_442-450	APP_439-450	0.4557	0.0252	0
CatF_442-450	BSA_421-433	0.3565	0.0873	0
CatF_442-450	C9_146-154	0.1574	0.4626	0
CatF_442-450	C9_186-194	0.18	0.4	0
CatF_442-450	C9_232-242	0.2687	0.2042	0
CatF_442-450	C9_473-483	0.3774	0.0691	0
CatF_442-450	C9_497-508	0.34	0.104	0
CatF_442-450	CTSB_58-71	0.3339	0.1108	0
CatF_442-450	CTSB_80-87	0.5687	0.0037	0
CatF_442-450	CTSB_210-220	0.5704	0.0036	0
CatF_442-450	CTSD_55-72	0.1183	0.5821	0
CatF_442-450	CTSD_112-122	0.5887	0.0025	0
CatF_442-450	CTSD_349-357	0.4504	0.0272	0
CatF_442-450	CatF_236-245	0.7452	<.0001	0
CatF_442-450	CatF_266-278	0.7513	<.0001	0
CTSL_105-116	Age	0.1566	0.4648	0
CTSL_105-116	T-tau (ng/L)	0.1716	0.4228	0
CTSL_105-116	Aβ1-42 (ng/L)	0.0126	0.9534	0
CTSL_105-116	P-tau (ng/L)	0.42	0.041	0
CTSL_105-116	AP2B1_712-719	0.5939	0.0022	0
CTSL_105-116	AP2B1_835-842	0.5687	0.0037	0
CTSL_105-116	AP2B1_868-878	0.3091	0.3848	0
CTSL_105-116	APP_289-301	0.7357	<.0001	0
CTSL_105-116	BSA_421-433	0.3809	0.0663	0
CTSL_105-116	C9_146-154	0.2643	0.2119	0
CTSL_105-116	C9_186-194	0.1261	0.5572	0
CTSL_105-116	C9_232-242	0.2035	0.3403	0
CTSL_105-116	C9_473-483	0.3617	0.0824	0
CTSL_105-116	C9_497-508	0.2913	0.1673	0
CTSL_105-116	CTSB_58-71	0.4713	0.0201	0
CTSL_105-116	CTSB_80-87	0.6496	0.0006	0
CTSL_105-116	CTSB_210-220	0.7313	<.0001	0
CTSL_105-116	CTSD_55-72	0.2	0.3488	0
CTSL_105-116	CTSD_112-122	0.6096	0.0016	0
CTSL_105-116	CTSD_349-357	0.4565	0.0249	0
CTSL_105-116	CatF_103-116	0.7896	<.0001	0
CTSL_105-116	CatF_236-245	0.7322	<.0001	0
CTSL_105-116	CatF_266-278	0.7478	<.0001	0
CTSL_105-116	CatF_442-450	0.727	<.0001	0
CTSZ_39-47	Age	0.1911	0.3711	0
CTSZ_39-47	T-tau (ng/L)	-0.0875	0.6842	0
CTSZ_39-47	Aβ1-42 (ng/L)	-0.324	0.1225	0
CTSZ_39-47	P-tau (ng/L)	0.091	0.6725	0
CTSZ_39-47	AP2B1_712-719	0.1922	0.3683	0
CTSZ_39-47	AP2B1_835-842	0.1678	0.4331	0
CTSZ_39-47	AP2B1_868-878	0.2242	0.5334	0
CTSZ_39-47	APP_289-301	0.467	0.0214	0
CTSZ_39-47	APP_439-450	0.5504	0.0053	0
CTSZ_39-47	BSA_421-433	0.4122	0.0453	0
CTSZ_39-47	C9_146-154	0.3565	0.0873	0
CTSZ_39-47	C9_186-194	0.1843	0.3885	0
CTSZ_39-47	C9_232-242	0.2313	0.2768	0
CTSZ_39-47	C9_473-483	0.3209	0.1263	0
CTSZ_39-47	C9_497-508	0.2548	0.2296	0
CTSZ_39-47	CTSB_58-71	0.3957	0.0557	0
CTSZ_39-47	CTSB_80-87	0.4965	0.0136	0
CTSZ_39-47	CTSB_210-220	0.6157	0.0014	0
CTSZ_39-47	CTSD_55-72	0.307	0.1446	0
CTSZ_39-47	CTSD_112-122	0.4678	0.0211	0
CTSZ_39-47	CTSD_349-357	0.4061	0.049	0
CTSZ_39-47	CatF_103-116	0.5426	0.0062	0
CTSZ_39-47	CatF_236-245	0.6252	0.0011	0
CTSZ_39-47	CatF_266-278	0.5183	0.0095	0
CTSZ_39-47	CatF_442-450	0.3826	0.065	0
CTSZ_39-47	CTSL_105-116	0.72	<.0001	0
CTSZ_261-270	Age	0.2592	0.2214	0
CTSZ_261-270	T-tau (ng/L)	-0.0692	0.7479	0
CTSZ_261-270	Aβ1-42 (ng/L)	-0.3849	0.0633	0
CTSZ_261-270	P-tau (ng/L)	0.1301	0.5444	0
CTSZ_261-270	AP2B1_712-719	0.353	0.0906	0
CTSZ_261-270	AP2B1_835-842	0.3087	0.1422	0
CTSZ_261-270	AP2B1_868-878	0.6121	0.06	0
CTSZ_261-270	APP_289-301	0.4922	0.0146	0
CTSZ_261-270	APP_439-450	0.4878	0.0156	0
CTSZ_261-270	BSA_421-433	0.493	0.0144	0
CTSZ_261-270	C9_146-154	0.2348	0.2695	0
CTSZ_261-270	C9_186-194	0.0861	0.6892	0
CTSZ_261-270	C9_232-242	0.1417	0.5088	0
CTSZ_261-270	C9_473-483	0.2826	0.1809	0
CTSZ_261-270	C9_497-508	0.2183	0.3056	0
CTSZ_261-270	CTSB_58-71	0.3035	0.1494	0
CTSZ_261-270	CTSB_80-87	0.427	0.0375	0
CTSZ_261-270	CTSB_210-220	0.4974	0.0134	0
CTSZ_261-270	CTSD_55-72	0.2061	0.334	0
CTSZ_261-270	CTSD_112-122	0.5513	0.0052	0
CTSZ_261-270	CTSD_349-357	0.4583	0.0243	0
CTSZ_261-270	CatF_103-116	0.6626	0.0004	0
CTSZ_261-270	CatF_236-245	0.7209	<.0001	0
CTSZ_261-270	CatF_266-278	0.6061	0.0017	0
CTSZ_261-270	CatF_442-450	0.5774	0.0031	0
CTSZ_261-270	CTSL_105-116	0.7052	0.0001	0
DPP7_40-47	Age	0.1357	0.5273	0
DPP7_40-47	T-tau (ng/L)	-0.1123	0.6012	0
DPP7_40-47	Aβ1-42 (ng/L)	-0.0161	0.9405	0
DPP7_40-47	P-tau (ng/L)	0.2459	0.2467	0
DPP7_40-47	AP2B1_712-719	0.3383	0.1059	0
DPP7_40-47	AP2B1_835-842	0.3861	0.0624	0
DPP7_40-47	AP2B1_868-878	0.5273	0.1173	0
DPP7_40-47	APP_289-301	0.6826	0.0002	0
DPP7_40-47	APP_439-450	0.7139	<.0001	0
DPP7_40-47	BSA_421-433	0.2983	0.1569	0
DPP7_40-47	C9_146-154	0.1391	0.5167	0
DPP7_40-47	C9_186-194	0.0313	0.8845	0
DPP7_40-47	C9_232-242	0.0713	0.7406	0
DPP7_40-47	C9_473-483	0.1974	0.3552	0
DPP7_40-47	C9_497-508	0.1757	0.4117	0
DPP7_40-47	CTSB_58-71	0.4157	0.0434	0
DPP7_40-47	CTSB_80-87	0.5635	0.0041	0
DPP7_40-47	CTSB_210-220	0.6774	0.0003	0
DPP7_40-47	CTSD_55-72	0.3026	0.1506	0
DPP7_40-47	CTSD_112-122	0.5861	0.0026	0
DPP7_40-47	CTSD_349-357	0.5861	0.0026	0
DPP7_40-47	CatF_103-116	0.58	0.003	0
DPP7_40-47	CatF_236-245	0.6035	0.0018	0
DPP7_40-47	CatF_266-278	0.62	0.0012	0
DPP7_40-47	CatF_442-450	0.5478	0.0056	0
DPP7_40-47	CTSZ_39-47	0.7696	<.0001	0
DPP7_40-47	CTSZ_261-270	0.7139	<.0001	0
DPP7_113-123	Age	0.1261	0.5571	0
DPP7_113-123	T-tau (ng/L)	-0.1293	0.547	0
DPP7_113-123	Aβ1-42 (ng/L)	0.0252	0.9069	0
DPP7_113-123	P-tau (ng/L)	0.2059	0.3345	0
DPP7_113-123	AP2B1_712-719	0.233	0.2731	0
DPP7_113-123	AP2B1_835-842	0.3165	0.1318	0
DPP7_113-123	AP2B1_868-878	0.3576	0.3104	0
DPP7_113-123	APP_289-301	0.5774	0.0031	0
DPP7_113-123	APP_439-450	0.6496	0.0006	0
DPP7_113-123	BSA_421-433	0.1139	0.5961	0
DPP7_113-123	C9_146-154	0.2878	0.1726	0
DPP7_113-123	C9_186-194	0.1835	0.3908	0
DPP7_113-123	C9_232-242	0.2157	0.3115	0
DPP7_113-123	C9_473-483	0.3165	0.1318	0
DPP7_113-123	C9_497-508	0.273	0.1967	0
DPP7_113-123	CTSB_58-71	0.5713	0.0035	0
DPP7_113-123	CTSB_80-87	0.5183	0.0095	0
DPP7_113-123	CTSB_210-220	0.653	0.0005	0
DPP7_113-123	CTSD_55-72	0.3287	0.1168	0
DPP7_113-123	CTSD_112-122	0.4774	0.0183	0
DPP7_113-123	CTSD_349-357	0.5061	0.0116	0
DPP7_113-123	CatF_103-116	0.5252	0.0084	0
DPP7_113-123	CatF_236-245	0.5678	0.0038	0
DPP7_113-123	CatF_266-278	0.6026	0.0018	0
DPP7_113-123	CatF_442-450	0.3965	0.0551	0
DPP7_113-123	CTSL_105-116	0.7617	<.0001	0
DPP7_113-123	CTSZ_39-47	0.7574	<.0001	0
DPP7_113-123	CTSZ_261-270	0.633	0.0009	0
DPP7_449-462	Age	0.2753	0.1929	0
DPP7_449-462	T-tau (ng/L)	0.0697	0.7463	0
DPP7_449-462	Aβ1-42 (ng/L)	0.0348	0.8718	0
DPP7_449-462	P-tau (ng/L)	0.3604	0.0836	0
DPP7_449-462	AP2B1_712-719	0.4052	0.0495	0
DPP7_449-462	AP2B1_835-842	0.453	0.0262	0
DPP7_449-462	AP2B1_868-878	0.4303	0.2145	0
DPP7_449-462	APP_289-301	0.6313	0.0009	0
DPP7_449-462	APP_439-450	0.6426	0.0007	0
DPP7_449-462	BSA_421-433	0.3009	0.1531	0
DPP7_449-462	C9_146-154	0.3809	0.0663	0
DPP7_449-462	C9_186-194	0.3043	0.1482	0
DPP7_449-462	C9_232-242	0.3052	0.147	0
DPP7_449-462	C9_473-483	0.407	0.0484	0
DPP7_449-462	C9_497-508	0.413	0.0448	0
DPP7_449-462	CTSB_58-71	0.3948	0.0562	0
DPP7_449-462	CTSB_80-87	0.6296	0.001	0
DPP7_449-462	CTSB_210-220	0.6104	0.0015	0
DPP7_449-462	CTSD_55-72	0.1748	0.414	0
DPP7_449-462	CTSD_112-122	0.6191	0.0013	0
DPP7_449-462	CTSD_349-357	0.6	0.0019	0
DPP7_449-462	CatF_103-116	0.6748	0.0003	0
DPP7_449-462	CatF_236-245	0.6617	0.0004	0
DPP7_449-462	CatF_266-278	0.6896	0.0002	0
DPP7_449-462	CatF_442-450	0.5991	0.002	0
DPP7_449-462	CTSZ_39-47	0.7043	0.0001	0
DPP7_449-462	CTSZ_261-270	0.6417	0.0007	0
GM2A_89-96	Age	0.2814	0.1828	0
GM2A_89-96	T-tau (ng/L)	0.6218	0.0012	0
GM2A_89-96	Aβ1-42 (ng/L)	0.1957	0.3594	0
GM2A_89-96	P-tau (ng/L)	0.7734	<.0001	0
GM2A_89-96	AP2B1_868-878	0.6	0.0667	0
GM2A_89-96	APP_289-301	0.4026	0.0511	0
GM2A_89-96	APP_439-450	0.2783	0.188	0
GM2A_89-96	BSA_421-433	0.193	0.3661	0
GM2A_89-96	C9_146-154	0.26	0.2198	0
GM2A_89-96	C9_186-194	0.273	0.1967	0
GM2A_89-96	C9_232-242	0.3426	0.1012	0
GM2A_89-96	C9_473-483	0.4391	0.0318	0
GM2A_89-96	C9_497-508	0.4	0.0528	0
GM2A_89-96	CTSB_58-71	0.0791	0.7132	0
GM2A_89-96	CTSB_80-87	0.5504	0.0053	0
GM2A_89-96	CTSB_210-220	0.2426	0.2533	0
GM2A_89-96	CTSD_55-72	-0.2009	0.3466	0
GM2A_89-96	CTSD_112-122	0.2313	0.2768	0
GM2A_89-96	CTSD_349-357	0.0461	0.8307	0
GM2A_89-96	CatF_103-116	0.6896	0.0002	0
GM2A_89-96	CatF_236-245	0.5452	0.0059	0
GM2A_89-96	CatF_266-278	0.6774	0.0003	0
GM2A_89-96	CatF_442-450	0.5939	0.0022	0
GM2A_89-96	CTSL_105-116	0.427	0.0375	0
GM2A_89-96	CTSZ_39-47	0.0617	0.7744	0
GM2A_89-96	CTSZ_261-270	0.207	0.3319	0
GM2A_89-96	DPP7_40-47	0.2348	0.2695	0
GM2A_89-96	DPP7_113-123	0.193	0.3661	0
GM2A_89-96	DPP7_449-462	0.3374	0.1069	0
GM2A_170-179	Age	0.0336	0.8762	0
GM2A_170-179	T-tau (ng/L)	0.4633	0.0226	0
GM2A_170-179	Aβ1-42 (ng/L)	0.4262	0.0378	0
GM2A_170-179	P-tau (ng/L)	0.5254	0.0084	0
GM2A_170-179	AP2B1_712-719	0.68	0.0003	0
GM2A_170-179	AP2B1_835-842	0.7261	<.0001	0
GM2A_170-179	AP2B1_868-878	0.7455	0.0133	0
GM2A_170-179	APP_289-301	0.34	0.104	0
GM2A_170-179	APP_439-450	0.1983	0.353	0
GM2A_170-179	BSA_421-433	-0.0383	0.8591	0
GM2A_170-179	C9_146-154	-0.22	0.3016	0
GM2A_170-179	C9_186-194	-0.1478	0.4906	0
GM2A_170-179	C9_232-242	-0.0652	0.7621	0
GM2A_170-179	C9_473-483	-0.0096	0.9646	0
GM2A_170-179	C9_497-508	0.0061	0.9775	0
GM2A_170-179	CTSB_58-71	-0.0009	0.9968	0
GM2A_170-179	CTSB_80-87	0.2704	0.2012	0
GM2A_170-179	CTSB_210-220	0.067	0.7559	0
GM2A_170-179	CTSD_55-72	-0.007	0.9743	0
GM2A_170-179	CTSD_112-122	0.1739	0.4164	0
GM2A_170-179	CTSD_349-357	0.0835	0.6982	0
GM2A_170-179	CatF_103-116	0.38	0.067	0
GM2A_170-179	CatF_236-245	0.2635	0.2135	0
GM2A_170-179	CatF_266-278	0.3383	0.1059	0
GM2A_170-179	CatF_442-450	0.48	0.0176	0
GM2A_170-179	CTSL_105-116	0.1496	0.4855	0
GM2A_170-179	CTSZ_39-47	-0.3261	0.1199	0
GM2A_170-179	CTSZ_261-270	-0.1026	0.6333	0
GM2A_170-179	DPP7_40-47	0.0252	0.9069	0
GM2A_170-179	DPP7_113-123	-0.0896	0.6773	0
GM2A_170-179	DPP7_449-462	0.053	0.8056	0
GM2A_170-179	GM2A_89-96	0.7443	<.0001	0
HEXB_285-300	Age	-0.0074	0.9726	0
HEXB_285-300	T-tau (ng/L)	-0.1097	0.6098	0
HEXB_285-300	Aβ1-42 (ng/L)	-0.0665	0.7574	0
HEXB_285-300	P-tau (ng/L)	0.1798	0.4006	0
HEXB_285-300	AP2B1_712-719	0.2748	0.1938	0
HEXB_285-300	AP2B1_835-842	0.3183	0.1296	0
HEXB_285-300	AP2B1_868-878	0.2727	0.4458	0
HEXB_285-300	APP_289-301	0.5783	0.0031	0
HEXB_285-300	APP_439-450	0.6687	0.0004	0
HEXB_285-300	BSA_421-433	0.3148	0.1341	0
HEXB_285-300	C9_146-154	0.1939	0.3639	0
HEXB_285-300	C9_186-194	0.1043	0.6275	0
HEXB_285-300	C9_232-242	0.1835	0.3908	0
HEXB_285-300	C9_473-483	0.3278	0.1179	0
HEXB_285-300	C9_497-508	0.3061	0.1458	0
HEXB_285-300	CTSB_58-71	0.6122	0.0015	0
HEXB_285-300	CTSB_80-87	0.4896	0.0152	0
HEXB_285-300	CTSB_210-220	0.6513	0.0006	0
HEXB_285-300	CTSD_55-72	0.4096	0.0469	0
HEXB_285-300	CTSD_112-122	0.6122	0.0015	0
HEXB_285-300	CTSD_349-357	0.5591	0.0045	0
HEXB_285-300	CatF_103-116	0.5957	0.0021	0
HEXB_285-300	CatF_236-245	0.5878	0.0025	0
HEXB_285-300	CatF_266-278	0.62	0.0012	0
HEXB_285-300	CatF_442-450	0.54	0.0065	0
HEXB_285-300	CTSZ_39-47	0.6591	0.0005	0
HEXB_285-300	CTSZ_261-270	0.707	0.0001	0
HEXB_285-300	DPP7_449-462	0.78	<.0001	0
HEXB_285-300	GM2A_89-96	0.1435	0.5036	0
HEXB_285-300	GM2A_170-179	-0.0443	0.837	0
HEXB_391-400	Age	0.1243	0.5627	0
HEXB_391-400	T-tau (ng/L)	0.0357	0.8684	0
HEXB_391-400	Aβ1-42 (ng/L)	-0.0644	0.7651	0
HEXB_391-400	P-tau (ng/L)	0.3086	0.1423	0
HEXB_391-400	AP2B1_712-719	0.5261	0.0083	0
HEXB_391-400	AP2B1_835-842	0.527	0.0082	0
HEXB_391-400	AP2B1_868-878	0.4667	0.1739	0
HEXB_391-400	APP_289-301	0.6696	0.0003	0
HEXB_391-400	APP_439-450	0.7035	0.0001	0
HEXB_391-400	BSA_421-433	0.4296	0.0362	0
HEXB_391-400	C9_146-154	0.187	0.3817	0
HEXB_391-400	C9_186-194	0.0765	0.7223	0
HEXB_391-400	C9_232-242	0.1661	0.438	0
HEXB_391-400	C9_473-483	0.3148	0.1341	0
HEXB_391-400	C9_497-508	0.2887	0.1713	0
HEXB_391-400	CTSB_58-71	0.433	0.0345	0
HEXB_391-400	CTSB_80-87	0.573	0.0034	0
HEXB_391-400	CTSB_210-220	0.647	0.0006	0
HEXB_391-400	CTSD_55-72	0.32	0.1274	0
HEXB_391-400	CTSD_112-122	0.6861	0.0002	0
HEXB_391-400	CTSD_349-357	0.567	0.0039	0
HEXB_391-400	CatF_103-116	0.733	<.0001	0
HEXB_391-400	CatF_236-245	0.7122	<.0001	0
HEXB_391-400	CatF_266-278	0.6878	0.0002	0
HEXB_391-400	CatF_442-450	0.7122	<.0001	0
HEXB_391-400	CTSZ_39-47	0.6783	0.0003	0
HEXB_391-400	CTSZ_261-270	0.7826	<.0001	0
HEXB_391-400	DPP7_113-123	0.7261	<.0001	0
HEXB_391-400	DPP7_449-462	0.7661	<.0001	0
HEXB_391-400	GM2A_89-96	0.3783	0.0684	0
HEXB_391-400	GM2A_170-179	0.1878	0.3795	0
LAMP1_138-146	Age	0.3525	0.0911	0
LAMP1_138-146	T-tau (ng/L)	0.2974	0.1581	0
LAMP1_138-146	Aβ1-42 (ng/L)	-0.0361	0.867	0
LAMP1_138-146	P-tau (ng/L)	0.4653	0.022	0
LAMP1_138-146	AP2B1_712-719	0.5287	0.0079	0
LAMP1_138-146	AP2B1_835-842	0.4791	0.0178	0
LAMP1_138-146	AP2B1_868-878	0.2727	0.4458	0
LAMP1_138-146	APP_289-301	0.5661	0.0039	0
LAMP1_138-146	APP_439-450	0.58	0.003	0
LAMP1_138-146	BSA_421-433	0.2791	0.1865	0
LAMP1_138-146	C9_146-154	0.4548	0.0256	0
LAMP1_138-146	C9_186-194	0.3209	0.1263	0
LAMP1_138-146	C9_232-242	0.3791	0.0677	0
LAMP1_138-146	C9_473-483	0.4635	0.0225	0
LAMP1_138-146	C9_497-508	0.3748	0.0712	0
LAMP1_138-146	CTSB_58-71	0.2183	0.3056	0
LAMP1_138-146	CTSB_80-87	0.6383	0.0008	0
LAMP1_138-146	CTSB_210-220	0.5191	0.0093	0
LAMP1_138-146	CTSD_55-72	0.1304	0.5435	0
LAMP1_138-146	CTSD_112-122	0.3939	0.0568	0
LAMP1_138-146	CTSD_349-357	0.3026	0.1506	0
LAMP1_138-146	CatF_103-116	0.7157	<.0001	0
LAMP1_138-146	CatF_236-245	0.6948	0.0002	0
LAMP1_138-146	CatF_266-278	0.7261	<.0001	0
LAMP1_138-146	CatF_442-450	0.5522	0.0051	0
LAMP1_138-146	CTSL_105-116	0.7826	<.0001	0
LAMP1_138-146	CTSZ_39-47	0.7574	<.0001	0
LAMP1_138-146	CTSZ_261-270	0.6565	0.0005	0
LAMP1_138-146	DPP7_40-47	0.753	<.0001	0
LAMP1_138-146	DPP7_113-123	0.6878	0.0002	0
LAMP1_138-146	DPP7_449-462	0.7487	<.0001	0
LAMP1_138-146	GM2A_89-96	0.4887	0.0154	0
LAMP1_138-146	GM2A_170-179	0.0661	0.759	0
LAMP1_138-146	HEXB_285-300	0.5913	0.0023	0
LAMP1_138-146	HEXB_391-400	0.6417	0.0007	0
LAMP1_327-337	Age	0.2657	0.2095	0
LAMP1_327-337	T-tau (ng/L)	0.4803	0.0175	0
LAMP1_327-337	Aβ1-42 (ng/L)	-0.0017	0.9936	0
LAMP1_327-337	P-tau (ng/L)	0.6716	0.0003	0
LAMP1_327-337	AP2B1_712-719	0.6983	0.0001	0
LAMP1_327-337	AP2B1_835-842	0.6757	0.0003	0
LAMP1_327-337	AP2B1_868-878	0.3212	0.3655	0
LAMP1_327-337	APP_289-301	0.5783	0.0031	0
LAMP1_327-337	APP_439-450	0.5443	0.006	0
LAMP1_327-337	BSA_421-433	0.3261	0.1199	0
LAMP1_327-337	C9_146-154	0.4748	0.0191	0
LAMP1_327-337	C9_186-194	0.3922	0.058	0
LAMP1_327-337	C9_232-242	0.4304	0.0358	0
LAMP1_327-337	C9_473-483	0.5704	0.0036	0
LAMP1_327-337	C9_497-508	0.52	0.0092	0
LAMP1_327-337	CTSB_58-71	0.3139	0.1352	0
LAMP1_327-337	CTSB_80-87	0.7148	<.0001	0
LAMP1_327-337	CTSB_210-220	0.533	0.0073	0
LAMP1_327-337	CTSD_55-72	0.0087	0.9678	0
LAMP1_327-337	CTSD_112-122	0.4243	0.0388	0
LAMP1_327-337	CTSD_349-357	0.2809	0.1837	0
LAMP1_327-337	CatF_103-116	0.7774	<.0001	0
LAMP1_327-337	CatF_236-245	0.7052	0.0001	0
LAMP1_327-337	CatF_266-278	0.76	<.0001	0
LAMP1_327-337	CatF_442-450	0.647	0.0006	0
LAMP1_327-337	CTSZ_39-47	0.6009	0.0019	0
LAMP1_327-337	CTSZ_261-270	0.5661	0.0039	0
LAMP1_327-337	DPP7_40-47	0.6539	0.0005	0
LAMP1_327-337	DPP7_113-123	0.6452	0.0007	0
LAMP1_327-337	DPP7_449-462	0.7261	<.0001	0
LAMP1_327-337	GM2A_89-96	0.6391	0.0008	0
LAMP1_327-337	GM2A_170-179	0.2339	0.2713	0
LAMP1_327-337	HEXB_285-300	0.5357	0.007	0
LAMP1_327-337	HEXB_391-400	0.6678	0.0004	0
LAMP1_357-363	Age	0.267	0.2072	0
LAMP1_357-363	T-tau (ng/L)	0.4611	0.0233	0
LAMP1_357-363	Aβ1-42 (ng/L)	-0.0235	0.9133	0
LAMP1_357-363	P-tau (ng/L)	0.6511	0.0006	0
LAMP1_357-363	AP2B1_712-719	0.767	<.0001	0
LAMP1_357-363	AP2B1_835-842	0.6965	0.0002	0
LAMP1_357-363	AP2B1_868-878	0.3576	0.3104	0
LAMP1_357-363	APP_289-301	0.6539	0.0005	0
LAMP1_357-363	APP_439-450	0.6704	0.0003	0
LAMP1_357-363	BSA_421-433	0.4635	0.0225	0
LAMP1_357-363	C9_146-154	0.3574	0.0864	0
LAMP1_357-363	C9_186-194	0.2435	0.2516	0
LAMP1_357-363	C9_232-242	0.3191	0.1285	0
LAMP1_357-363	C9_473-483	0.4661	0.0217	0
LAMP1_357-363	C9_497-508	0.3991	0.0533	0
LAMP1_357-363	CTSB_58-71	0.2574	0.2247	0
LAMP1_357-363	CTSB_80-87	0.7165	<.0001	0
LAMP1_357-363	CTSB_210-220	0.6148	0.0014	0
LAMP1_357-363	CTSD_55-72	0.0217	0.9197	0
LAMP1_357-363	CTSD_112-122	0.5252	0.0084	0
LAMP1_357-363	CTSD_349-357	0.3122	0.1375	0
LAMP1_357-363	CatF_236-245	0.7461	<.0001	0
LAMP1_357-363	CatF_266-278	0.7991	<.0001	0
LAMP1_357-363	CatF_442-450	0.7661	<.0001	0
LAMP1_357-363	CTSZ_39-47	0.5817	0.0029	0
LAMP1_357-363	CTSZ_261-270	0.6165	0.0013	0
LAMP1_357-363	DPP7_40-47	0.6817	0.0002	0
LAMP1_357-363	DPP7_113-123	0.547	0.0057	0
LAMP1_357-363	DPP7_449-462	0.72	<.0001	0
LAMP1_357-363	GM2A_89-96	0.6435	0.0007	0
LAMP1_357-363	GM2A_170-179	0.2957	0.1607	0
LAMP1_357-363	HEXB_285-300	0.6296	0.001	0
LAMP1_357-363	HEXB_391-400	0.7574	<.0001	0
LAMP2_133-144	Age	0.1069	0.6191	0
LAMP2_133-144	T-tau (ng/L)	0.3052	0.1469	0
LAMP2_133-144	Aβ1-42 (ng/L)	0.2283	0.2833	0
LAMP2_133-144	P-tau (ng/L)	0.5162	0.0098	0
LAMP2_133-144	AP2B1_712-719	0.7191	<.0001	0
LAMP2_133-144	AP2B1_835-842	0.7635	<.0001	0
LAMP2_133-144	APP_289-301	0.6722	0.0003	0
LAMP2_133-144	APP_439-450	0.5435	0.0061	0
LAMP2_133-144	BSA_421-433	0.2035	0.3403	0
LAMP2_133-144	C9_146-154	-0.2287	0.2824	0
LAMP2_133-144	C9_186-194	-0.1974	0.3552	0
LAMP2_133-144	C9_232-242	-0.1357	0.5274	0
LAMP2_133-144	C9_473-483	-0.0165	0.9389	0
LAMP2_133-144	C9_497-508	0.0278	0.8973	0
LAMP2_133-144	CTSB_58-71	0.107	0.6189	0
LAMP2_133-144	CTSB_80-87	0.3635	0.0808	0
LAMP2_133-144	CTSB_210-220	0.333	0.1118	0
LAMP2_133-144	CTSD_55-72	0.1243	0.5626	0
LAMP2_133-144	CTSD_112-122	0.4791	0.0178	0
LAMP2_133-144	CTSD_349-357	0.4443	0.0296	0
LAMP2_133-144	CatF_103-116	0.4765	0.0186	0
LAMP2_133-144	CatF_236-245	0.3026	0.1506	0
LAMP2_133-144	CatF_266-278	0.3991	0.0533	0
LAMP2_133-144	CatF_442-450	0.6791	0.0003	0
LAMP2_133-144	CTSL_105-116	0.5087	0.0111	0
LAMP2_133-144	CTSZ_39-47	-0.0148	0.9453	0
LAMP2_133-144	CTSZ_261-270	0.1652	0.4404	0
LAMP2_133-144	DPP7_40-47	0.42	0.041	0
LAMP2_133-144	DPP7_113-123	0.2661	0.2088	0
LAMP2_133-144	DPP7_449-462	0.4348	0.0337	0
LAMP2_133-144	GM2A_89-96	0.5739	0.0034	0
LAMP2_133-144	GM2A_170-179	0.747	<.0001	0
LAMP2_133-144	HEXB_285-300	0.3217	0.1252	0
LAMP2_133-144	HEXB_391-400	0.4939	0.0142	0
LAMP2_133-144	LAMP1_138-146	0.2391	0.2604	0
LAMP2_133-144	LAMP1_327-337	0.4696	0.0206	0
LAMP2_133-144	LAMP1_357-363	0.5339	0.0072	0
LAMP2_145-152	Age	0.2679	0.2057	0
LAMP2_145-152	T-tau (ng/L)	0.3697	0.0754	0
LAMP2_145-152	Aβ1-42 (ng/L)	-0.1366	0.5246	0
LAMP2_145-152	P-tau (ng/L)	0.6198	0.0012	0
LAMP2_145-152	AP2B1_712-719	0.5843	0.0027	0
LAMP2_145-152	AP2B1_835-842	0.5687	0.0037	0
LAMP2_145-152	AP2B1_868-878	0.4182	0.2291	0
LAMP2_145-152	APP_289-301	0.3783	0.0684	0
LAMP2_145-152	APP_439-450	0.4522	0.0265	0
LAMP2_145-152	BSA_421-433	0.3965	0.0551	0
LAMP2_145-152	C9_146-154	0.5443	0.006	0
LAMP2_145-152	C9_186-194	0.4426	0.0303	0
LAMP2_145-152	C9_232-242	0.5278	0.008	0
LAMP2_145-152	C9_473-483	0.6565	0.0005	0
LAMP2_145-152	C9_497-508	0.5496	0.0054	0
LAMP2_145-152	CTSB_58-71	0.3426	0.1012	0
LAMP2_145-152	CTSB_80-87	0.6852	0.0002	0
LAMP2_145-152	CTSB_210-220	0.5687	0.0037	0
LAMP2_145-152	CTSD_55-72	0.0948	0.6595	0
LAMP2_145-152	CTSD_112-122	0.5696	0.0037	0
LAMP2_145-152	CTSD_349-357	0.3635	0.0808	0
LAMP2_145-152	CatF_236-245	0.7522	<.0001	0
LAMP2_145-152	CatF_442-450	0.573	0.0034	0
LAMP2_145-152	CTSL_105-116	0.753	<.0001	0
LAMP2_145-152	CTSZ_39-47	0.6357	0.0008	0
LAMP2_145-152	CTSZ_261-270	0.573	0.0034	0
LAMP2_145-152	DPP7_40-47	0.6774	0.0003	0
LAMP2_145-152	DPP7_113-123	0.6496	0.0006	0
LAMP2_145-152	DPP7_449-462	0.7174	<.0001	0
LAMP2_145-152	GM2A_89-96	0.5661	0.0039	0
LAMP2_145-152	GM2A_170-179	0.1113	0.6046	0
LAMP2_145-152	HEXB_285-300	0.587	0.0026	0
LAMP2_145-152	HEXB_391-400	0.5957	0.0021	0
LAMP2_145-152	LAMP2_133-144	0.2957	0.1607	0
LAMP2_153-161	Age	0.1466	0.4943	0
LAMP2_153-161	T-tau (ng/L)	-0.0335	0.8764	0
LAMP2_153-161	Aβ1-42 (ng/L)	0.3975	0.0544	0
LAMP2_153-161	P-tau (ng/L)	0.1602	0.4547	0
LAMP2_153-161	AP2B1_712-719	0.333	0.1118	0
LAMP2_153-161	AP2B1_835-842	0.3017	0.1519	0
LAMP2_153-161	APP_289-301	0.633	0.0009	0
LAMP2_153-161	APP_439-450	0.6026	0.0018	0
LAMP2_153-161	BSA_421-433	-0.14	0.5141	0
LAMP2_153-161	C9_146-154	-0.1904	0.3728	0
LAMP2_153-161	C9_186-194	-0.2417	0.2551	0
LAMP2_153-161	C9_232-242	-0.1365	0.5247	0
LAMP2_153-161	C9_473-483	-0.1296	0.5462	0
LAMP2_153-161	C9_497-508	-0.1496	0.4855	0
LAMP2_153-161	CTSB_58-71	0.2183	0.3056	0
LAMP2_153-161	CTSB_80-87	0.2157	0.3115	0
LAMP2_153-161	CTSB_210-220	0.3548	0.0889	0
LAMP2_153-161	CTSD_55-72	0.2583	0.223	0
LAMP2_153-161	CTSD_112-122	0.2078	0.3298	0
LAMP2_153-161	CTSD_349-357	0.2861	0.1753	0
LAMP2_153-161	CatF_103-116	0.2957	0.1607	0
LAMP2_153-161	CatF_236-245	0.2757	0.1923	0
LAMP2_153-161	CatF_266-278	0.2939	0.1633	0
LAMP2_153-161	CatF_442-450	0.4722	0.0198	0
LAMP2_153-161	CTSL_105-116	0.6009	0.0019	0
LAMP2_153-161	CTSZ_39-47	0.3617	0.0824	0
LAMP2_153-161	CTSZ_261-270	0.3487	0.0949	0
LAMP2_153-161	DPP7_40-47	0.6104	0.0015	0
LAMP2_153-161	DPP7_113-123	0.5357	0.007	0
LAMP2_153-161	DPP7_449-462	0.5096	0.011	0
LAMP2_153-161	GM2A_89-96	0.2548	0.2296	0
LAMP2_153-161	GM2A_170-179	0.34	0.104	0
LAMP2_153-161	HEXB_285-300	0.4496	0.0275	0
LAMP2_153-161	HEXB_391-400	0.5548	0.0049	0
LAMP2_153-161	LAMP1_138-146	0.4965	0.0136	0
LAMP2_153-161	LAMP1_327-337	0.4748	0.0191	0
LAMP2_153-161	LAMP1_357-363	0.4939	0.0142	0
LAMP2_153-161	LAMP2_133-144	0.5948	0.0022	0
LAMP2_153-161	LAMP2_145-152	0.3139	0.1352	0
LAMP2_281-289	Age	0.1619	0.4499	0
LAMP2_281-289	T-tau (ng/L)	0.2852	0.1767	0
LAMP2_281-289	Aβ1-42 (ng/L)	0.2422	0.2541	0
LAMP2_281-289	P-tau (ng/L)	0.5946	0.0022	0
LAMP2_281-289	AP2B1_712-719	0.7617	<.0001	0
LAMP2_281-289	AP2B1_835-842	0.7609	<.0001	0
LAMP2_281-289	APP_289-301	0.6948	0.0002	0
LAMP2_281-289	APP_439-450	0.6252	0.0011	0
LAMP2_281-289	BSA_421-433	0.1635	0.4453	0
LAMP2_281-289	C9_146-154	-0.0739	0.7314	0
LAMP2_281-289	C9_186-194	-0.1087	0.6132	0
LAMP2_281-289	C9_232-242	-0.0157	0.9421	0
LAMP2_281-289	C9_473-483	0.1157	0.5905	0
LAMP2_281-289	C9_497-508	0.0835	0.6982	0
LAMP2_281-289	CTSB_58-71	0.2357	0.2676	0
LAMP2_281-289	CTSB_80-87	0.4713	0.0201	0
LAMP2_281-289	CTSB_210-220	0.4748	0.0191	0
LAMP2_281-289	CTSD_55-72	-0.0261	0.9037	0
LAMP2_281-289	CTSD_112-122	0.4052	0.0495	0
LAMP2_281-289	CTSD_349-357	0.3391	0.105	0
LAMP2_281-289	CatF_103-116	0.587	0.0026	0
LAMP2_281-289	CatF_236-245	0.4643	0.0223	0
LAMP2_281-289	CatF_266-278	0.6043	0.0018	0
LAMP2_281-289	CatF_442-450	0.6939	0.0002	0
LAMP2_281-289	CTSL_105-116	0.6878	0.0002	0
LAMP2_281-289	CTSZ_39-47	0.2165	0.3095	0
LAMP2_281-289	CTSZ_261-270	0.3939	0.0568	0
LAMP2_281-289	DPP7_40-47	0.6339	0.0009	0
LAMP2_281-289	DPP7_113-123	0.5139	0.0102	0
LAMP2_281-289	DPP7_449-462	0.5791	0.003	0
LAMP2_281-289	GM2A_89-96	0.6557	0.0005	0
LAMP2_281-289	GM2A_170-179	0.6061	0.0017	0
LAMP2_281-289	HEXB_285-300	0.5426	0.0062	0
LAMP2_281-289	HEXB_391-400	0.6652	0.0004	0
LAMP2_281-289	LAMP1_138-146	0.5009	0.0127	0
LAMP2_281-289	LAMP1_327-337	0.6209	0.0012	0
LAMP2_281-289	LAMP1_357-363	0.7148	<.0001	0
LAMP2_281-289	LAMP2_145-152	0.5496	0.0054	0
LAMP2_281-289	LAMP2_153-161	0.6783	0.0003	0
LYZ_52-59	Age	0.5668	0.0039	0
LYZ_52-59	T-tau (ng/L)	0.4228	0.0395	0
LYZ_52-59	Aβ1-42 (ng/L)	-0.264	0.2126	0
LYZ_52-59	P-tau (ng/L)	0.3869	0.0618	0
LYZ_52-59	AP2B1_712-719	0.3113	0.1387	0
LYZ_52-59	AP2B1_835-842	0.287	0.174	0
LYZ_52-59	AP2B1_868-878	0.0061	0.9867	0
LYZ_52-59	APP_289-301	0.0835	0.6982	0
LYZ_52-59	APP_439-450	0.0287	0.8941	0
LYZ_52-59	BSA_421-433	0.3757	0.0705	0
LYZ_52-59	C9_146-154	0.767	<.0001	0
LYZ_52-59	C9_186-194	0.6896	0.0002	0
LYZ_52-59	C9_232-242	0.6357	0.0008	0
LYZ_52-59	C9_473-483	0.64	0.0008	0
LYZ_52-59	C9_497-508	0.627	0.001	0
LYZ_52-59	CTSB_58-71	-0.1678	0.4331	0
LYZ_52-59	CTSB_80-87	0.3626	0.0816	0
LYZ_52-59	CTSB_210-220	0.0539	0.8024	0
LYZ_52-59	CTSD_55-72	-0.0696	0.7467	0
LYZ_52-59	CTSD_112-122	0.36	0.084	0
LYZ_52-59	CTSD_349-357	0.2835	0.1795	0
LYZ_52-59	CatF_103-116	0.4817	0.0171	0
LYZ_52-59	CatF_236-245	0.4991	0.013	0
LYZ_52-59	CatF_266-278	0.4426	0.0303	0
LYZ_52-59	CatF_442-450	0.2939	0.1633	0
LYZ_52-59	CTSL_105-116	0.2643	0.2119	0
LYZ_52-59	CTSZ_39-47	0.4965	0.0136	0
LYZ_52-59	CTSZ_261-270	0.4609	0.0234	0
LYZ_52-59	DPP7_40-47	0.2791	0.1865	0
LYZ_52-59	DPP7_113-123	0.2643	0.2119	0
LYZ_52-59	DPP7_449-462	0.4322	0.0349	0
LYZ_52-59	GM2A_89-96	0.2687	0.2042	0
LYZ_52-59	GM2A_170-179	-0.08	0.7102	0
LYZ_52-59	HEXB_285-300	0.1104	0.6075	0
LYZ_52-59	HEXB_391-400	0.2843	0.1781	0
LYZ_52-59	LAMP1_138-146	0.5174	0.0096	0
LYZ_52-59	LAMP1_327-337	0.4722	0.0198	0
LYZ_52-59	LAMP1_357-363	0.3774	0.0691	0
LYZ_52-59	LAMP2_133-144	-0.0426	0.8433	0
LYZ_52-59	LAMP2_145-152	0.5026	0.0123	0
LYZ_52-59	LAMP2_153-161	-0.0643	0.7652	0
LYZ_52-59	LAMP2_281-289	0.02	0.9261	0
LYZ_69-80	Age	0.558	0.0046	0
LYZ_69-80	T-tau (ng/L)	0.4942	0.0141	0
LYZ_69-80	Aβ1-42 (ng/L)	-0.2922	0.1658	0
LYZ_69-80	P-tau (ng/L)	0.4966	0.0136	0
LYZ_69-80	AP2B1_712-719	0.4261	0.0379	0
LYZ_69-80	AP2B1_835-842	0.367	0.0778	0
LYZ_69-80	AP2B1_868-878	-0.2121	0.5563	0
LYZ_69-80	APP_289-301	0.0322	0.8814	0
LYZ_69-80	APP_439-450	0.0113	0.9582	0
LYZ_69-80	BSA_421-433	0.4148	0.0439	0
LYZ_69-80	C9_146-154	0.7704	<.0001	0
LYZ_69-80	C9_186-194	0.68	0.0003	0
LYZ_69-80	C9_232-242	0.6983	0.0001	0
LYZ_69-80	C9_473-483	0.7417	<.0001	0
LYZ_69-80	C9_497-508	0.7017	0.0001	0
LYZ_69-80	CTSB_58-71	-0.127	0.5544	0
LYZ_69-80	CTSB_80-87	0.2757	0.1923	0
LYZ_69-80	CTSB_210-220	0.0139	0.9486	0
LYZ_69-80	CTSD_55-72	-0.1478	0.4906	0
LYZ_69-80	CTSD_112-122	0.3513	0.0923	0
LYZ_69-80	CTSD_349-357	0.2174	0.3075	0
LYZ_69-80	CatF_103-116	0.58	0.003	0
LYZ_69-80	CatF_236-245	0.5678	0.0038	0
LYZ_69-80	CatF_266-278	0.5687	0.0037	0
LYZ_69-80	CatF_442-450	0.3661	0.0785	0
LYZ_69-80	CTSL_105-116	0.3061	0.1458	0
LYZ_69-80	CTSZ_39-47	0.4487	0.0279	0
LYZ_69-80	CTSZ_261-270	0.4965	0.0136	0
LYZ_69-80	DPP7_40-47	0.227	0.2862	0
LYZ_69-80	DPP7_113-123	0.2165	0.3095	0
LYZ_69-80	DPP7_449-462	0.3539	0.0898	0
LYZ_69-80	GM2A_89-96	0.3878	0.0611	0
LYZ_69-80	GM2A_170-179	-0.0026	0.9903	0
LYZ_69-80	HEXB_285-300	0.18	0.4	0
LYZ_69-80	HEXB_391-400	0.3557	0.0881	0
LYZ_69-80	LAMP1_138-146	0.507	0.0115	0
LYZ_69-80	LAMP1_327-337	0.4983	0.0132	0
LYZ_69-80	LAMP1_357-363	0.4391	0.0318	0
LYZ_69-80	LAMP2_133-144	-0.0287	0.8941	0
LYZ_69-80	LAMP2_145-152	0.5574	0.0047	0
LYZ_69-80	LAMP2_153-161	-0.0965	0.6537	0
LYZ_69-80	LAMP2_281-289	0.087	0.6862	0
FUCA1_114-130	Age	0.3853	0.063	0
FUCA1_114-130	T-tau (ng/L)	0.2883	0.1719	0
FUCA1_114-130	Aβ1-42 (ng/L)	-0.4484	0.028	0
FUCA1_114-130	P-tau (ng/L)	0.4096	0.0469	0
FUCA1_114-130	AP2B1_712-719	0.5687	0.0037	0
FUCA1_114-130	AP2B1_835-842	0.5678	0.0038	0
FUCA1_114-130	AP2B1_868-878	0.4182	0.2291	0
FUCA1_114-130	APP_289-301	0.4583	0.0243	0
FUCA1_114-130	APP_439-450	0.4478	0.0282	0
FUCA1_114-130	BSA_421-433	0.7	0.0001	0
FUCA1_114-130	C9_146-154	0.3174	0.1307	0
FUCA1_114-130	C9_186-194	0.2496	0.2396	0
FUCA1_114-130	C9_232-242	0.273	0.1967	0
FUCA1_114-130	C9_473-483	0.4365	0.033	0
FUCA1_114-130	C9_497-508	0.4217	0.0401	0
FUCA1_114-130	CTSB_58-71	0.1113	0.6046	0
FUCA1_114-130	CTSB_80-87	0.5748	0.0033	0
FUCA1_114-130	CTSB_210-220	0.4339	0.0341	0
FUCA1_114-130	CTSD_55-72	0.253	0.2329	0
FUCA1_114-130	CTSD_112-122	0.7374	<.0001	0
FUCA1_114-130	CTSD_349-357	0.5365	0.0069	0
FUCA1_114-130	CatF_103-116	0.7843	<.0001	0
FUCA1_114-130	CatF_236-245	0.7017	0.0001	0
FUCA1_114-130	CatF_266-278	0.7026	0.0001	0
FUCA1_114-130	CatF_442-450	0.687	0.0002	0
FUCA1_114-130	CTSL_105-116	0.6513	0.0006	0
FUCA1_114-130	CTSZ_39-47	0.5783	0.0031	0
FUCA1_114-130	CTSZ_261-270	0.7009	0.0001	0
FUCA1_114-130	DPP7_40-47	0.62	0.0012	0
FUCA1_114-130	DPP7_113-123	0.44	0.0314	0
FUCA1_114-130	DPP7_449-462	0.6496	0.0006	0
FUCA1_114-130	GM2A_89-96	0.4183	0.042	0
FUCA1_114-130	GM2A_170-179	0.1652	0.4404	0
FUCA1_114-130	HEXB_285-300	0.5991	0.002	0
FUCA1_114-130	HEXB_391-400	0.6957	0.0002	0
FUCA1_114-130	LAMP1_138-146	0.6487	0.0006	0
FUCA1_114-130	LAMP1_327-337	0.5757	0.0032	0
FUCA1_114-130	LAMP1_357-363	0.7357	<.0001	0
FUCA1_114-130	LAMP2_133-144	0.4174	0.0424	0
FUCA1_114-130	LAMP2_145-152	0.6913	0.0002	0
FUCA1_114-130	LAMP2_153-161	0.1896	0.375	0
FUCA1_114-130	LAMP2_281-289	0.4574	0.0246	0
FUCA1_114-130	LYZ_52-59	0.5774	0.0031	0
FUCA1_114-130	LYZ_69-80	0.6043	0.0018	0
FUCA1_163-173	Age	0.4114	0.0458	0
FUCA1_163-173	T-tau (ng/L)	0.29	0.1692	0
FUCA1_163-173	Aβ1-42 (ng/L)	-0.4118	0.0455	0
FUCA1_163-173	P-tau (ng/L)	0.4266	0.0377	0
FUCA1_163-173	AP2B1_712-719	0.5748	0.0033	0
FUCA1_163-173	AP2B1_835-842	0.5748	0.0033	0
FUCA1_163-173	AP2B1_868-878	0.4182	0.2291	0
FUCA1_163-173	APP_289-301	0.4609	0.0234	0
FUCA1_163-173	APP_439-450	0.4235	0.0392	0
FUCA1_163-173	BSA_421-433	0.6852	0.0002	0
FUCA1_163-173	C9_146-154	0.3391	0.105	0
FUCA1_163-173	C9_186-194	0.2878	0.1726	0
FUCA1_163-173	C9_232-242	0.3043	0.1482	0
FUCA1_163-173	C9_473-483	0.4574	0.0246	0
FUCA1_163-173	C9_497-508	0.4487	0.0279	0
FUCA1_163-173	CTSB_58-71	0.1043	0.6275	0
FUCA1_163-173	CTSB_80-87	0.5957	0.0021	0
FUCA1_163-173	CTSB_210-220	0.4383	0.0322	0
FUCA1_163-173	CTSD_55-72	0.1983	0.353	0
FUCA1_163-173	CTSD_112-122	0.7165	<.0001	0
FUCA1_163-173	CTSD_349-357	0.5261	0.0083	0
FUCA1_163-173	CatF_103-116	0.787	<.0001	0
FUCA1_163-173	CatF_236-245	0.6948	0.0002	0
FUCA1_163-173	CatF_266-278	0.7052	0.0001	0
FUCA1_163-173	CatF_442-450	0.7087	0.0001	0
FUCA1_163-173	CTSL_105-116	0.6348	0.0009	0
FUCA1_163-173	CTSZ_39-47	0.56	0.0044	0
FUCA1_163-173	CTSZ_261-270	0.6913	0.0002	0
FUCA1_163-173	DPP7_40-47	0.6148	0.0014	0
FUCA1_163-173	DPP7_113-123	0.427	0.0375	0
FUCA1_163-173	DPP7_449-462	0.6574	0.0005	0
FUCA1_163-173	GM2A_89-96	0.4548	0.0256	0
FUCA1_163-173	GM2A_170-179	0.1783	0.4046	0
FUCA1_163-173	HEXB_285-300	0.5774	0.0031	0
FUCA1_163-173	HEXB_391-400	0.6826	0.0002	0
FUCA1_163-173	LAMP1_138-146	0.6409	0.0007	0
FUCA1_163-173	LAMP1_327-337	0.5678	0.0038	0
FUCA1_163-173	LAMP1_357-363	0.7357	<.0001	0
FUCA1_163-173	LAMP2_133-144	0.4191	0.0415	0
FUCA1_163-173	LAMP2_145-152	0.6878	0.0002	0
FUCA1_163-173	LAMP2_153-161	0.1739	0.4164	0
FUCA1_163-173	LAMP2_281-289	0.4713	0.0201	0
FUCA1_163-173	LYZ_52-59	0.5896	0.0024	0
FUCA1_163-173	LYZ_69-80	0.6096	0.0016	0
FUCA1_344-354	Age	0.4908	0.0149	0
FUCA1_344-354	T-tau (ng/L)	0.3375	0.1068	0
FUCA1_344-354	Aβ1-42 (ng/L)	-0.3514	0.0922	0
FUCA1_344-354	P-tau (ng/L)	0.4222	0.0399	0
FUCA1_344-354	AP2B1_712-719	0.5287	0.0079	0
FUCA1_344-354	AP2B1_835-842	0.5183	0.0095	0
FUCA1_344-354	AP2B1_868-878	0.0545	0.881	0
FUCA1_344-354	APP_289-301	0.4061	0.049	0
FUCA1_344-354	APP_439-450	0.3626	0.0816	0
FUCA1_344-354	BSA_421-433	0.6687	0.0004	0
FUCA1_344-354	C9_146-154	0.5096	0.011	0
FUCA1_344-354	C9_186-194	0.4791	0.0178	0
FUCA1_344-354	C9_232-242	0.4843	0.0165	0
FUCA1_344-354	C9_473-483	0.6217	0.0012	0
FUCA1_344-354	C9_497-508	0.6104	0.0015	0
FUCA1_344-354	CTSB_58-71	0.1287	0.549	0
FUCA1_344-354	CTSB_80-87	0.5513	0.0052	0
FUCA1_344-354	CTSB_210-220	0.367	0.0778	0
FUCA1_344-354	CTSD_55-72	0.1348	0.5301	0
FUCA1_344-354	CTSD_112-122	0.647	0.0006	0
FUCA1_344-354	CTSD_349-357	0.4574	0.0246	0
FUCA1_344-354	CatF_103-116	0.7826	<.0001	0
FUCA1_344-354	CatF_236-245	0.6643	0.0004	0
FUCA1_344-354	CatF_266-278	0.7	0.0001	0
FUCA1_344-354	CatF_442-450	0.6974	0.0002	0
FUCA1_344-354	CTSL_105-116	0.6191	0.0013	0
FUCA1_344-354	CTSZ_39-47	0.5583	0.0046	0
FUCA1_344-354	CTSZ_261-270	0.6443	0.0007	0
FUCA1_344-354	DPP7_40-47	0.533	0.0073	0
FUCA1_344-354	DPP7_113-123	0.4043	0.05	0
FUCA1_344-354	DPP7_449-462	0.6417	0.0007	0
FUCA1_344-354	GM2A_89-96	0.4548	0.0256	0
FUCA1_344-354	GM2A_170-179	0.0974	0.6507	0
FUCA1_344-354	HEXB_285-300	0.5409	0.0064	0
FUCA1_344-354	HEXB_391-400	0.6417	0.0007	0
FUCA1_344-354	LAMP1_138-146	0.6365	0.0008	0
FUCA1_344-354	LAMP1_327-337	0.5852	0.0027	0
FUCA1_344-354	LAMP1_357-363	0.7078	0.0001	0
FUCA1_344-354	LAMP2_133-144	0.3122	0.1375	0
FUCA1_344-354	LAMP2_145-152	0.6852	0.0002	0
FUCA1_344-354	LAMP2_153-161	0.0974	0.6507	0
FUCA1_344-354	LAMP2_281-289	0.3565	0.0873	0
FUCA1_344-354	LYZ_52-59	0.6652	0.0004	0
FUCA1_344-354	LYZ_69-80	0.7078	0.0001	0
TCN2_45-59	Age	-0.0524	0.808	0
TCN2_45-59	T-tau (ng/L)	0.1903	0.3731	0
TCN2_45-59	Aβ1-42 (ng/L)	0.0587	0.7852	0
TCN2_45-59	P-tau (ng/L)	0.4122	0.0453	0
TCN2_45-59	AP2B1_712-719	0.48	0.0176	0
TCN2_45-59	AP2B1_835-842	0.5913	0.0023	0
TCN2_45-59	AP2B1_868-878	0.3455	0.3282	0
TCN2_45-59	APP_289-301	0.2487	0.2413	0
TCN2_45-59	APP_439-450	0.1383	0.5194	0
TCN2_45-59	BSA_421-433	0.2157	0.3115	0
TCN2_45-59	C9_146-154	0.1122	0.6018	0
TCN2_45-59	C9_186-194	0.2165	0.3095	0
TCN2_45-59	C9_232-242	0.2791	0.1865	0
TCN2_45-59	C9_473-483	0.4087	0.0474	0
TCN2_45-59	C9_497-508	0.4043	0.05	0
TCN2_45-59	CTSB_58-71	0.3765	0.0698	0
TCN2_45-59	CTSB_80-87	0.5287	0.0079	0
TCN2_45-59	CTSB_210-220	0.4087	0.0474	0
TCN2_45-59	CTSD_55-72	0.0539	0.8024	0
TCN2_45-59	CTSD_112-122	0.5052	0.0118	0
TCN2_45-59	CTSD_349-357	0.3539	0.0898	0
TCN2_45-59	CatF_103-116	0.5835	0.0028	0
TCN2_45-59	CatF_236-245	0.5096	0.011	0
TCN2_45-59	CatF_266-278	0.6174	0.0013	0
TCN2_45-59	CatF_442-450	0.6217	0.0012	0
TCN2_45-59	CTSL_105-116	0.3991	0.0533	0
TCN2_45-59	CTSZ_39-47	0.1513	0.4803	0
TCN2_45-59	CTSZ_261-270	0.3357	0.1088	0
TCN2_45-59	DPP7_40-47	0.3374	0.1069	0
TCN2_45-59	DPP7_113-123	0.2304	0.2787	0
TCN2_45-59	DPP7_449-462	0.3809	0.0663	0
TCN2_45-59	GM2A_89-96	0.4304	0.0358	0
TCN2_45-59	GM2A_170-179	0.3696	0.0755	0
TCN2_45-59	HEXB_285-300	0.4139	0.0444	0
TCN2_45-59	HEXB_391-400	0.4809	0.0174	0
TCN2_45-59	LAMP1_138-146	0.2409	0.2569	0
TCN2_45-59	LAMP1_327-337	0.3722	0.0733	0
TCN2_45-59	LAMP1_357-363	0.4235	0.0392	0
TCN2_45-59	LAMP2_133-144	0.447	0.0285	0
TCN2_45-59	LAMP2_145-152	0.447	0.0285	0
TCN2_45-59	LAMP2_153-161	0.0957	0.6566	0
TCN2_45-59	LAMP2_281-289	0.5	0.0128	0
TCN2_45-59	LYZ_52-59	0.1887	0.3772	0
TCN2_45-59	LYZ_69-80	0.3035	0.1494	0
TCN2_45-59	FUCA1_114-130	0.4487	0.0279	0
TCN2_45-59	FUCA1_163-173	0.4704	0.0203	0
TCN2_45-59	FUCA1_344-354	0.4417	0.0307	0
TCN2_300-313	Age	0.0541	0.8018	0
TCN2_300-313	T-tau (ng/L)	0.3627	0.0815	0
TCN2_300-313	Aβ1-42 (ng/L)	-0.067	0.7559	0
TCN2_300-313	P-tau (ng/L)	0.5132	0.0103	0
TCN2_300-313	AP2B1_712-719	0.5087	0.0111	0
TCN2_300-313	AP2B1_835-842	0.5783	0.0031	0
TCN2_300-313	AP2B1_868-878	0.1273	0.7261	0
TCN2_300-313	APP_289-301	0.133	0.5354	0
TCN2_300-313	APP_439-450	0.0478	0.8244	0
TCN2_300-313	BSA_421-433	0.3496	0.0941	0
TCN2_300-313	C9_146-154	0.3957	0.0557	0
TCN2_300-313	C9_186-194	0.4522	0.0265	0
TCN2_300-313	C9_232-242	0.5026	0.0123	0
TCN2_300-313	C9_473-483	0.6287	0.001	0
TCN2_300-313	C9_497-508	0.5983	0.002	0
TCN2_300-313	CTSB_58-71	0.3426	0.1012	0
TCN2_300-313	CTSB_80-87	0.6313	0.0009	0
TCN2_300-313	CTSB_210-220	0.393	0.0574	0
TCN2_300-313	CTSD_55-72	-0.0113	0.9582	0
TCN2_300-313	CTSD_112-122	0.5165	0.0098	0
TCN2_300-313	CTSD_349-357	0.2861	0.1753	0
TCN2_300-313	CatF_103-116	0.6983	0.0001	0
TCN2_300-313	CatF_236-245	0.6687	0.0004	0
TCN2_300-313	CatF_266-278	0.7217	<.0001	0
TCN2_300-313	CatF_442-450	0.6078	0.0016	0
TCN2_300-313	CTSL_105-116	0.4061	0.049	0
TCN2_300-313	CTSZ_39-47	0.307	0.1446	0
TCN2_300-313	CTSZ_261-270	0.4557	0.0252	0
TCN2_300-313	DPP7_40-47	0.3061	0.1458	0
TCN2_300-313	DPP7_113-123	0.2209	0.2997	0
TCN2_300-313	DPP7_449-462	0.393	0.0574	0
TCN2_300-313	GM2A_89-96	0.5	0.0128	0
TCN2_300-313	GM2A_170-179	0.2922	0.1659	0
TCN2_300-313	HEXB_285-300	0.3391	0.105	0
TCN2_300-313	HEXB_391-400	0.4652	0.022	0
TCN2_300-313	LAMP1_138-146	0.373	0.0726	0
TCN2_300-313	LAMP1_327-337	0.5009	0.0127	0
TCN2_300-313	LAMP1_357-363	0.5	0.0128	0
TCN2_300-313	LAMP2_133-144	0.2696	0.2027	0
TCN2_300-313	LAMP2_145-152	0.5826	0.0028	0
TCN2_300-313	LAMP2_153-161	-0.0226	0.9165	0
TCN2_300-313	LAMP2_281-289	0.3626	0.0816	0
TCN2_300-313	LYZ_52-59	0.487	0.0158	0
TCN2_300-313	LYZ_69-80	0.58	0.003	0
TCN2_300-313	FUCA1_114-130	0.5391	0.0066	0
TCN2_300-313	FUCA1_163-173	0.5609	0.0044	0
TCN2_300-313	FUCA1_344-354	0.5696	0.0037	0
TCN2_393-399	Age	0.0702	0.7443	0
TCN2_393-399	T-tau (ng/L)	0.3192	0.1284	0
TCN2_393-399	Aβ1-42 (ng/L)	-0.1731	0.4186	0
TCN2_393-399	P-tau (ng/L)	0.5206	0.0091	0
TCN2_393-399	AP2B1_712-719	0.5391	0.0066	0
TCN2_393-399	AP2B1_835-842	0.5678	0.0038	0
TCN2_393-399	AP2B1_868-878	0.0788	0.8287	0
TCN2_393-399	APP_289-301	0.1313	0.5408	0
TCN2_393-399	APP_439-450	0.027	0.9005	0
TCN2_393-399	BSA_421-433	0.3635	0.0808	0
TCN2_393-399	C9_146-154	0.3678	0.077	0
TCN2_393-399	C9_186-194	0.3991	0.0533	0
TCN2_393-399	C9_232-242	0.4304	0.0358	0
TCN2_393-399	C9_473-483	0.5696	0.0037	0
TCN2_393-399	C9_497-508	0.5365	0.0069	0
TCN2_393-399	CTSB_58-71	0.1122	0.6018	0
TCN2_393-399	CTSB_80-87	0.5452	0.0059	0
TCN2_393-399	CTSB_210-220	0.2487	0.2413	0
TCN2_393-399	CTSD_55-72	-0.0678	0.7528	0
TCN2_393-399	CTSD_112-122	0.56	0.0044	0
TCN2_393-399	CTSD_349-357	0.36	0.084	0
TCN2_393-399	CatF_103-116	0.6435	0.0007	0
TCN2_393-399	CatF_236-245	0.5678	0.0038	0
TCN2_393-399	CatF_266-278	0.6478	0.0006	0
TCN2_393-399	CatF_442-450	0.553	0.0051	0
TCN2_393-399	CTSL_105-116	0.3557	0.0881	0
TCN2_393-399	CTSZ_39-47	0.2583	0.223	0
TCN2_393-399	CTSZ_261-270	0.4278	0.037	0
TCN2_393-399	DPP7_40-47	0.2487	0.2413	0
TCN2_393-399	DPP7_113-123	0.1357	0.5274	0
TCN2_393-399	DPP7_449-462	0.3304	0.1148	0
TCN2_393-399	GM2A_89-96	0.52	0.0092	0
TCN2_393-399	GM2A_170-179	0.2861	0.1753	0
TCN2_393-399	HEXB_285-300	0.2174	0.3075	0
TCN2_393-399	HEXB_391-400	0.4243	0.0388	0
TCN2_393-399	LAMP1_138-146	0.327	0.1189	0
TCN2_393-399	LAMP1_327-337	0.4774	0.0183	0
TCN2_393-399	LAMP1_357-363	0.4713	0.0201	0
TCN2_393-399	LAMP2_133-144	0.3078	0.1434	0
TCN2_393-399	LAMP2_145-152	0.5435	0.0061	0
TCN2_393-399	LAMP2_153-161	-0.0409	0.8496	0
TCN2_393-399	LAMP2_281-289	0.3548	0.0889	0
TCN2_393-399	LYZ_52-59	0.5235	0.0087	0
TCN2_393-399	LYZ_69-80	0.6148	0.0014	0
TCN2_393-399	FUCA1_114-130	0.5391	0.0066	0
TCN2_393-399	FUCA1_163-173	0.567	0.0039	0
TCN2_393-399	FUCA1_344-354	0.5696	0.0037	0
TPP1_61-78	Age	0.0428	0.8428	0
TPP1_61-78	T-tau (ng/L)	-0.2456	0.2474	0
TPP1_61-78	Aβ1-42 (ng/L)	0.0183	0.9325	0
TPP1_61-78	P-tau (ng/L)	0.074	0.7311	0
TPP1_61-78	AP2B1_712-719	0.2948	0.162	0
TPP1_61-78	AP2B1_835-842	0.2878	0.1726	0
TPP1_61-78	AP2B1_868-878	0.4909	0.1497	0
TPP1_61-78	APP_289-301	0.7304	<.0001	0
TPP1_61-78	APP_439-450	0.7826	<.0001	0
TPP1_61-78	BSA_421-433	0.2783	0.188	0
TPP1_61-78	C9_146-154	0.0322	0.8814	0
TPP1_61-78	C9_186-194	-0.0948	0.6595	0
TPP1_61-78	C9_232-242	-0.06	0.7806	0
TPP1_61-78	C9_473-483	0.0965	0.6537	0
TPP1_61-78	C9_497-508	0.0496	0.8181	0
TPP1_61-78	CTSB_58-71	0.4809	0.0174	0
TPP1_61-78	CTSB_80-87	0.3774	0.0691	0
TPP1_61-78	CTSB_210-220	0.5965	0.0021	0
TPP1_61-78	CTSD_55-72	0.28	0.1851	0
TPP1_61-78	CTSD_112-122	0.4913	0.0148	0
TPP1_61-78	CTSD_349-357	0.453	0.0262	0
TPP1_61-78	CatF_103-116	0.5217	0.0089	0
TPP1_61-78	CatF_236-245	0.5226	0.0088	0
TPP1_61-78	CatF_266-278	0.5009	0.0127	0
TPP1_61-78	CatF_442-450	0.5261	0.0083	0
TPP1_61-78	CTSZ_39-47	0.7061	0.0001	0
TPP1_61-78	CTSZ_261-270	0.7426	<.0001	0
TPP1_61-78	DPP7_449-462	0.7504	<.0001	0
TPP1_61-78	GM2A_89-96	0.1783	0.4046	0
TPP1_61-78	GM2A_170-179	-0.0122	0.955	0
TPP1_61-78	LAMP1_138-146	0.5748	0.0033	0
TPP1_61-78	LAMP1_327-337	0.5635	0.0041	0
TPP1_61-78	LAMP1_357-363	0.6052	0.0017	0
TPP1_61-78	LAMP2_133-144	0.3896	0.0599	0
TPP1_61-78	LAMP2_145-152	0.4965	0.0136	0
TPP1_61-78	LAMP2_153-161	0.633	0.0009	0
TPP1_61-78	LAMP2_281-289	0.5791	0.003	0
TPP1_61-78	LYZ_52-59	0.0565	0.7931	0
TPP1_61-78	LYZ_69-80	0.0548	0.7993	0
TPP1_61-78	FUCA1_114-130	0.453	0.0262	0
TPP1_61-78	FUCA1_163-173	0.4374	0.0326	0
TPP1_61-78	FUCA1_344-354	0.4035	0.0506	0
TPP1_61-78	TCN2_45-59	0.193	0.3661	0
TPP1_61-78	TCN2_300-313	0.1426	0.5062	0
TPP1_61-78	TCN2_393-399	0.1096	0.6103	0
TPP1_246-259	Age	0.12	0.5765	0
TPP1_246-259	T-tau (ng/L)	-0.1385	0.5187	0
TPP1_246-259	Aβ1-42 (ng/L)	-0.0348	0.8718	0
TPP1_246-259	P-tau (ng/L)	0.2141	0.315	0
TPP1_246-259	AP2B1_712-719	0.3765	0.0698	0
TPP1_246-259	AP2B1_835-842	0.3661	0.0785	0
TPP1_246-259	AP2B1_868-878	0.4182	0.2291	0
TPP1_246-259	APP_289-301	0.6357	0.0008	0
TPP1_246-259	APP_439-450	0.753	<.0001	0
TPP1_246-259	BSA_421-433	0.3861	0.0624	0
TPP1_246-259	C9_146-154	0.1748	0.414	0
TPP1_246-259	C9_186-194	0.0165	0.9389	0
TPP1_246-259	C9_232-242	0.1087	0.6132	0
TPP1_246-259	C9_473-483	0.2391	0.2604	0
TPP1_246-259	C9_497-508	0.1826	0.3931	0
TPP1_246-259	CTSB_58-71	0.453	0.0262	0
TPP1_246-259	CTSB_80-87	0.4443	0.0296	0
TPP1_246-259	CTSB_210-220	0.6957	0.0002	0
TPP1_246-259	CTSD_55-72	0.2774	0.1894	0
TPP1_246-259	CTSD_112-122	0.6252	0.0011	0
TPP1_246-259	CTSD_349-357	0.5287	0.0079	0
TPP1_246-259	CatF_103-116	0.6478	0.0006	0
TPP1_246-259	CatF_236-245	0.6548	0.0005	0
TPP1_246-259	CatF_266-278	0.6557	0.0005	0
TPP1_246-259	CatF_442-450	0.5843	0.0027	0
TPP1_246-259	CTSZ_39-47	0.7035	0.0001	0
TPP1_246-259	CTSZ_261-270	0.7043	0.0001	0
TPP1_246-259	DPP7_449-462	0.7913	<.0001	0
TPP1_246-259	GM2A_89-96	0.267	0.2073	0
TPP1_246-259	GM2A_170-179	0.0148	0.9453	0
TPP1_246-259	LAMP1_138-146	0.6478	0.0006	0
TPP1_246-259	LAMP1_327-337	0.6052	0.0017	0
TPP1_246-259	LAMP1_357-363	0.7148	<.0001	0
TPP1_246-259	LAMP2_133-144	0.3817	0.0657	0
TPP1_246-259	LAMP2_145-152	0.6513	0.0006	0
TPP1_246-259	LAMP2_153-161	0.5417	0.0063	0
TPP1_246-259	LAMP2_281-289	0.6017	0.0019	0
TPP1_246-259	LYZ_52-59	0.1452	0.4984	0
TPP1_246-259	LYZ_69-80	0.2078	0.3298	0
TPP1_246-259	FUCA1_114-130	0.567	0.0039	0
TPP1_246-259	FUCA1_163-173	0.5539	0.005	0
TPP1_246-259	FUCA1_344-354	0.5183	0.0095	0
TPP1_246-259	TCN2_45-59	0.2583	0.223	0
TPP1_246-259	TCN2_300-313	0.233	0.2731	0
TPP1_246-259	TCN2_393-399	0.1957	0.3595	0
TPP1_507-520	Age	0.1099	0.609	0
TPP1_507-520	T-tau (ng/L)	-0.196	0.3588	0
TPP1_507-520	Aβ1-42 (ng/L)	-0.0987	0.6463	0
TPP1_507-520	P-tau (ng/L)	0.1271	0.554	0
TPP1_507-520	AP2B1_712-719	0.3565	0.0873	0
TPP1_507-520	AP2B1_835-842	0.3374	0.1069	0
TPP1_507-520	AP2B1_868-878	0.4788	0.1615	0
TPP1_507-520	APP_289-301	0.6913	0.0002	0
TPP1_507-520	APP_439-450	0.7722	<.0001	0
TPP1_507-520	BSA_421-433	0.4061	0.049	0
TPP1_507-520	C9_146-154	0.1078	0.616	0
TPP1_507-520	C9_186-194	-0.0452	0.8338	0
TPP1_507-520	C9_232-242	0.0383	0.8591	0
TPP1_507-520	C9_473-483	0.1617	0.4502	0
TPP1_507-520	C9_497-508	0.1217	0.5709	0
TPP1_507-520	CTSB_58-71	0.4461	0.0289	0
TPP1_507-520	CTSB_80-87	0.4217	0.0401	0
TPP1_507-520	CTSB_210-220	0.6957	0.0002	0
TPP1_507-520	CTSD_55-72	0.3096	0.141	0
TPP1_507-520	CTSD_112-122	0.5913	0.0023	0
TPP1_507-520	CTSD_349-357	0.5235	0.0087	0
TPP1_507-520	CatF_103-116	0.6026	0.0018	0
TPP1_507-520	CatF_236-245	0.607	0.0017	0
TPP1_507-520	CatF_266-278	0.567	0.0039	0
TPP1_507-520	CatF_442-450	0.5748	0.0033	0
TPP1_507-520	CTSZ_39-47	0.747	<.0001	0
TPP1_507-520	CTSZ_261-270	0.7583	<.0001	0
TPP1_507-520	DPP7_113-123	0.7957	<.0001	0
TPP1_507-520	DPP7_449-462	0.7696	<.0001	0
TPP1_507-520	GM2A_89-96	0.207	0.3319	0
TPP1_507-520	GM2A_170-179	-0.053	0.8056	0
TPP1_507-520	LAMP1_138-146	0.6304	0.001	0
TPP1_507-520	LAMP1_327-337	0.5887	0.0025	0
TPP1_507-520	LAMP1_357-363	0.6887	0.0002	0
TPP1_507-520	LAMP2_133-144	0.3661	0.0785	0
TPP1_507-520	LAMP2_145-152	0.5757	0.0032	0
TPP1_507-520	LAMP2_153-161	0.5496	0.0054	0
TPP1_507-520	LAMP2_281-289	0.5591	0.0045	0
TPP1_507-520	LYZ_52-59	0.1078	0.616	0
TPP1_507-520	LYZ_69-80	0.1487	0.488	0
TPP1_507-520	FUCA1_114-130	0.5487	0.0055	0
TPP1_507-520	FUCA1_163-173	0.5339	0.0072	0
TPP1_507-520	FUCA1_344-354	0.4974	0.0134	0
TPP1_507-520	TCN2_45-59	0.2461	0.2464	0
TPP1_507-520	TCN2_300-313	0.1983	0.353	0
TPP1_507-520	TCN2_393-399	0.1661	0.438	0
Ubiquitin_12-27	Age	0.1976	0.3546	0
Ubiquitin_12-27	T-tau (ng/L)	0.6005	0.0019	0
Ubiquitin_12-27	Aβ1-42 (ng/L)	-0.1953	0.3605	0
Ubiquitin_12-27	P-tau (ng/L)	0.7465	<.0001	0
Ubiquitin_12-27	AP2B1_868-878	0.6242	0.0537	0
Ubiquitin_12-27	APP_289-301	0.493	0.0144	0
Ubiquitin_12-27	APP_439-450	0.413	0.0448	0
Ubiquitin_12-27	BSA_421-433	0.5852	0.0027	0
Ubiquitin_12-27	C9_146-154	0.2261	0.2881	0
Ubiquitin_12-27	C9_186-194	0.1443	0.501	0
Ubiquitin_12-27	C9_232-242	0.193	0.3661	0
Ubiquitin_12-27	C9_473-483	0.3496	0.0941	0
Ubiquitin_12-27	C9_497-508	0.3226	0.1242	0
Ubiquitin_12-27	CTSB_58-71	-0.0739	0.7314	0
Ubiquitin_12-27	CTSB_80-87	0.5817	0.0029	0
Ubiquitin_12-27	CTSB_210-220	0.3226	0.1242	0
Ubiquitin_12-27	CTSD_55-72	-0.1322	0.5381	0
Ubiquitin_12-27	CTSD_112-122	0.4626	0.0228	0
Ubiquitin_12-27	CTSD_349-357	0.2261	0.2881	0
Ubiquitin_12-27	CatF_103-116	0.6817	0.0002	0
Ubiquitin_12-27	CatF_236-245	0.533	0.0073	0
Ubiquitin_12-27	CatF_266-278	0.5843	0.0027	0
Ubiquitin_12-27	CatF_442-450	0.6035	0.0018	0
Ubiquitin_12-27	CTSL_105-116	0.5113	0.0107	0
Ubiquitin_12-27	CTSZ_39-47	0.2348	0.2695	0
Ubiquitin_12-27	CTSZ_261-270	0.4374	0.0326	0
Ubiquitin_12-27	DPP7_40-47	0.307	0.1446	0
Ubiquitin_12-27	DPP7_113-123	0.133	0.5354	0
Ubiquitin_12-27	DPP7_449-462	0.3339	0.1108	0
Ubiquitin_12-27	GM2A_89-96	0.7843	<.0001	0
Ubiquitin_12-27	GM2A_170-179	0.5383	0.0067	0
Ubiquitin_12-27	HEXB_285-300	0.2417	0.2551	0
Ubiquitin_12-27	HEXB_391-400	0.5191	0.0093	0
Ubiquitin_12-27	LAMP1_138-146	0.4861	0.016	0
Ubiquitin_12-27	LAMP1_327-337	0.6035	0.0018	0
Ubiquitin_12-27	LAMP1_357-363	0.733	<.0001	0
Ubiquitin_12-27	LAMP2_133-144	0.5757	0.0032	0
Ubiquitin_12-27	LAMP2_145-152	0.5661	0.0039	0
Ubiquitin_12-27	LAMP2_153-161	0.1313	0.5408	0
Ubiquitin_12-27	LAMP2_281-289	0.6417	0.0007	0
Ubiquitin_12-27	LYZ_52-59	0.4122	0.0453	0
Ubiquitin_12-27	LYZ_69-80	0.487	0.0158	0
Ubiquitin_12-27	FUCA1_114-130	0.6678	0.0004	0
Ubiquitin_12-27	FUCA1_163-173	0.6896	0.0002	0
Ubiquitin_12-27	FUCA1_344-354	0.6209	0.0012	0
Ubiquitin_12-27	TCN2_45-59	0.4513	0.0269	0
Ubiquitin_12-27	TCN2_300-313	0.5496	0.0054	0
Ubiquitin_12-27	TCN2_393-399	0.6339	0.0009	0
Ubiquitin_12-27	TPP1_61-78	0.2426	0.2533	0
Ubiquitin_12-27	TPP1_246-259	0.347	0.0967	0
Ubiquitin_12-27	TPP1_507-520	0.327	0.1189	0
Ubiquitin_64-72	Age	0.2064	0.3333	0
Ubiquitin_64-72	T-tau (ng/L)	0.6166	0.0013	0
Ubiquitin_64-72	Aβ1-42 (ng/L)	-0.1305	0.5434	0
Ubiquitin_64-72	P-tau (ng/L)	0.7486	<.0001	0
Ubiquitin_64-72	AP2B1_868-878	0.5879	0.0739	0
Ubiquitin_64-72	APP_289-301	0.5557	0.0048	0
Ubiquitin_64-72	APP_439-450	0.4617	0.0231	0
Ubiquitin_64-72	BSA_421-433	0.5557	0.0048	0
Ubiquitin_64-72	C9_146-154	0.1757	0.4117	0
Ubiquitin_64-72	C9_186-194	0.1052	0.6246	0
Ubiquitin_64-72	C9_232-242	0.1296	0.5462	0
Ubiquitin_64-72	C9_473-483	0.3026	0.1506	0
Ubiquitin_64-72	C9_497-508	0.2791	0.1865	0
Ubiquitin_64-72	CTSB_58-71	-0.1009	0.6391	0
Ubiquitin_64-72	CTSB_80-87	0.553	0.0051	0
Ubiquitin_64-72	CTSB_210-220	0.2878	0.1726	0
Ubiquitin_64-72	CTSD_55-72	-0.1348	0.5301	0
Ubiquitin_64-72	CTSD_112-122	0.447	0.0285	0
Ubiquitin_64-72	CTSD_349-357	0.2165	0.3095	0
Ubiquitin_64-72	CatF_103-116	0.6687	0.0004	0
Ubiquitin_64-72	CatF_236-245	0.4974	0.0134	0
Ubiquitin_64-72	CatF_266-278	0.5557	0.0048	0
Ubiquitin_64-72	CatF_442-450	0.6217	0.0012	0
Ubiquitin_64-72	CTSL_105-116	0.52	0.0092	0
Ubiquitin_64-72	CTSZ_39-47	0.18	0.4	0
Ubiquitin_64-72	CTSZ_261-270	0.373	0.0726	0
Ubiquitin_64-72	DPP7_40-47	0.2974	0.1582	0
Ubiquitin_64-72	DPP7_113-123	0.1278	0.5517	0
Ubiquitin_64-72	DPP7_449-462	0.3357	0.1088	0
Ubiquitin_64-72	GM2A_89-96	0.7939	<.0001	0
Ubiquitin_64-72	GM2A_170-179	0.5991	0.002	0
Ubiquitin_64-72	HEXB_285-300	0.2	0.3488	0
Ubiquitin_64-72	HEXB_391-400	0.4913	0.0148	0
Ubiquitin_64-72	LAMP1_138-146	0.4661	0.0217	0
Ubiquitin_64-72	LAMP1_327-337	0.6287	0.001	0
Ubiquitin_64-72	LAMP1_357-363	0.7287	<.0001	0
Ubiquitin_64-72	LAMP2_133-144	0.6652	0.0004	0
Ubiquitin_64-72	LAMP2_145-152	0.5339	0.0072	0
Ubiquitin_64-72	LAMP2_153-161	0.1861	0.384	0
Ubiquitin_64-72	LAMP2_281-289	0.667	0.0004	0
Ubiquitin_64-72	LYZ_52-59	0.3791	0.0677	0
Ubiquitin_64-72	LYZ_69-80	0.4339	0.0341	0
Ubiquitin_64-72	FUCA1_114-130	0.64	0.0008	0
Ubiquitin_64-72	FUCA1_163-173	0.6539	0.0005	0
Ubiquitin_64-72	FUCA1_344-354	0.593	0.0023	0
Ubiquitin_64-72	TCN2_45-59	0.4139	0.0444	0
Ubiquitin_64-72	TCN2_300-313	0.4913	0.0148	0
Ubiquitin_64-72	TCN2_393-399	0.5878	0.0025	0
Ubiquitin_64-72	TPP1_61-78	0.2626	0.2151	0
Ubiquitin_64-72	TPP1_246-259	0.3339	0.1108	0
Ubiquitin_64-72	TPP1_507-520	0.3122	0.1375	0

## Sheet: Clincial Study I stable MCI
Table S4. Spearman's correlation in the stable MCI group of Clinical Study I (N = 15).
Variable	by Variable	Spearman ρ	Prob>|ρ|	Correlation (True = 1, False = 0)
AP2B1_835-842	AP2B1_712-719	0.9393	<.0001	1
AP2B1_868-878	AP2B1_712-719	0.9464	<.0001	1
APP_289-301	AP2B1_712-719	0.8643	<.0001	1
APP_439-450	AP2B1_712-719	0.8286	0.0001	1
CatF_266-278	AP2B1_712-719	0.8036	0.0003	1
CatF_442-450	AP2B1_712-719	0.8714	<.0001	1
CTSL_105-116	AP2B1_712-719	0.9286	<.0001	1
CTSZ_261-270	AP2B1_712-719	0.8607	<.0001	1
CTSZ_39-47	AP2B1_712-719	0.8857	<.0001	1
GM2A_170-179	AP2B1_712-719	0.8857	<.0001	1
GM2A_89-96	AP2B1_712-719	0.9214	<.0001	1
HEXB_391-400	AP2B1_712-719	0.8321	0.0001	1
LAMP1_138-146	AP2B1_712-719	0.9	<.0001	1
LAMP1_357-363	AP2B1_712-719	0.8393	<.0001	1
LAMP2_133-144	AP2B1_712-719	0.9036	<.0001	1
LAMP2_145-152	AP2B1_712-719	0.9107	<.0001	1
LAMP2_153-161	AP2B1_712-719	0.8893	<.0001	1
LAMP2_281-289	AP2B1_712-719	0.8929	<.0001	1
FUCA1_114-130	AP2B1_712-719	0.825	0.0002	1
FUCA1_163-173	AP2B1_712-719	0.8571	<.0001	1
FUCA1_344-354	AP2B1_712-719	0.8143	0.0002	1
AP2B1_868-878	AP2B1_835-842	0.9071	<.0001	1
APP_289-301	AP2B1_835-842	0.825	0.0002	1
CTSL_105-116	AP2B1_835-842	0.9	<.0001	1
CTSZ_39-47	AP2B1_835-842	0.8214	0.0002	1
GM2A_170-179	AP2B1_835-842	0.8107	0.0002	1
GM2A_89-96	AP2B1_835-842	0.8536	<.0001	1
LAMP2_153-161	AP2B1_835-842	0.8107	0.0002	1
APP_289-301	AP2B1_868-878	0.8071	0.0003	1
CTSB_80-87	AP2B1_868-878	0.8036	0.0003	1
CatF_266-278	AP2B1_868-878	0.8357	0.0001	1
CatF_442-450	AP2B1_868-878	0.8571	<.0001	1
CTSL_105-116	AP2B1_868-878	0.8964	<.0001	1
CTSZ_261-270	AP2B1_868-878	0.8321	0.0001	1
GM2A_170-179	AP2B1_868-878	0.8821	<.0001	1
GM2A_89-96	AP2B1_868-878	0.85	<.0001	1
LAMP1_138-146	AP2B1_868-878	0.8607	<.0001	1
LAMP1_357-363	AP2B1_868-878	0.8357	0.0001	1
LAMP2_133-144	AP2B1_868-878	0.8107	0.0002	1
LAMP2_145-152	AP2B1_868-878	0.8929	<.0001	1
LAMP2_153-161	AP2B1_868-878	0.8536	<.0001	1
FUCA1_114-130	AP2B1_868-878	0.8536	<.0001	1
FUCA1_163-173	AP2B1_868-878	0.9	<.0001	1
FUCA1_344-354	AP2B1_868-878	0.8679	<.0001	1
APP_439-450	APP_289-301	0.9071	<.0001	1
CTSZ_261-270	APP_289-301	0.8321	0.0001	1
CTSZ_39-47	APP_289-301	0.8179	0.0002	1
HEXB_285-300	APP_289-301	0.8179	0.0002	1
HEXB_391-400	APP_289-301	0.8429	<.0001	1
LAMP1_138-146	APP_289-301	0.8357	0.0001	1
LAMP2_133-144	APP_289-301	0.8071	0.0003	1
LAMP2_153-161	APP_289-301	0.8107	0.0002	1
LAMP2_281-289	APP_289-301	0.8143	0.0002	1
CTSL_105-116	APP_439-450	0.8643	<.0001	1
HEXB_391-400	APP_439-450	0.8214	0.0002	1
LAMP1_138-146	APP_439-450	0.85	<.0001	1
LAMP1_327-337	APP_439-450	0.8179	0.0002	1
LAMP2_153-161	APP_439-450	0.8143	0.0002	1
C9_186-194	C9_146-154	0.9786	<.0001	1
C9_232-242	C9_146-154	0.9893	<.0001	1
C9_473-483	C9_146-154	0.9643	<.0001	1
C9_497-508	C9_146-154	0.9571	<.0001	1
C9_232-242	C9_186-194	0.975	<.0001	1
C9_473-483	C9_186-194	0.95	<.0001	1
C9_497-508	C9_186-194	0.9464	<.0001	1
C9_473-483	C9_232-242	0.975	<.0001	1
C9_497-508	C9_232-242	0.9821	<.0001	1
C9_497-508	C9_473-483	0.9857	<.0001	1
CTSL_105-116	CTSB_210-220	0.85	<.0001	1
HEXB_391-400	CTSB_210-220	0.8643	<.0001	1
CTSB_80-87	CTSB_58-71	0.8179	0.0002	1
LAMP1_138-146	CTSB_58-71	0.8214	0.0002	1
CTSZ_261-270	CTSB_80-87	0.8214	0.0002	1
LAMP1_138-146	CTSB_80-87	0.8643	<.0001	1
LAMP1_327-337	CTSB_80-87	0.9179	<.0001	1
LAMP1_357-363	CTSB_80-87	0.8393	<.0001	1
LAMP2_145-152	CTSB_80-87	0.8464	<.0001	1
LAMP2_153-161	CTSB_80-87	0.8571	<.0001	1
FUCA1_163-173	CTSB_80-87	0.8214	0.0002	1
CTSD_349-357	CTSD_112-122	0.8429	<.0001	1
LYZ_69-80	CTSD_112-122	0.8357	0.0001	1
CTSD_112-122	CTSD_55-72	0.9857	<.0001	1
CTSD_349-357	CTSD_55-72	0.8643	<.0001	1
CatF_236-245	CatF_103-116	0.8786	<.0001	1
CatF_266-278	CatF_103-116	0.9	<.0001	1
CatF_442-450	CatF_103-116	0.9214	<.0001	1
GM2A_89-96	CatF_103-116	0.8857	<.0001	1
LAMP2_133-144	CatF_103-116	0.8679	<.0001	1
LAMP2_281-289	CatF_103-116	0.8179	0.0002	1
CatF_266-278	CatF_236-245	0.8964	<.0001	1
CatF_442-450	CatF_236-245	0.9071	<.0001	1
CTSL_105-116	CatF_236-245	0.8321	0.0001	1
GM2A_89-96	CatF_236-245	0.8429	<.0001	1
HEXB_391-400	CatF_236-245	0.8214	0.0002	1
CatF_442-450	CatF_266-278	0.9429	<.0001	1
CTSL_105-116	CatF_266-278	0.8464	<.0001	1
GM2A_170-179	CatF_266-278	0.825	0.0002	1
GM2A_89-96	CatF_266-278	0.8821	<.0001	1
LAMP2_133-144	CatF_266-278	0.8143	0.0002	1
CTSL_105-116	CatF_442-450	0.875	<.0001	1
GM2A_170-179	CatF_442-450	0.9107	<.0001	1
GM2A_89-96	CatF_442-450	0.9571	<.0001	1
LAMP1_138-146	CatF_442-450	0.8107	0.0002	1
LAMP2_133-144	CatF_442-450	0.8286	0.0001	1
LAMP2_145-152	CatF_442-450	0.8071	0.0003	1
CTSZ_261-270	CTSL_105-116	0.8536	<.0001	1
CTSZ_39-47	CTSL_105-116	0.8821	<.0001	1
GM2A_89-96	CTSL_105-116	0.8786	<.0001	1
HEXB_285-300	CTSL_105-116	0.825	0.0002	1
HEXB_391-400	CTSL_105-116	0.8893	<.0001	1
LAMP1_138-146	CTSL_105-116	0.8643	<.0001	1
LAMP1_357-363	CTSL_105-116	0.8143	0.0002	1
LAMP2_133-144	CTSL_105-116	0.825	0.0002	1
LAMP2_145-152	CTSL_105-116	0.825	0.0002	1
LAMP2_153-161	CTSL_105-116	0.8393	<.0001	1
LAMP2_281-289	CTSL_105-116	0.8179	0.0002	1
LAMP1_138-146	CTSZ_261-270	0.925	<.0001	1
LAMP1_327-337	CTSZ_261-270	0.8036	0.0003	1
LAMP1_357-363	CTSZ_261-270	0.8143	0.0002	1
LAMP2_153-161	CTSZ_261-270	0.8036	0.0003	1
FUCA1_114-130	CTSZ_261-270	0.8214	0.0002	1
FUCA1_163-173	CTSZ_261-270	0.8679	<.0001	1
FUCA1_344-354	CTSZ_261-270	0.8143	0.0002	1
CTSZ_261-270	CTSZ_39-47	0.9143	<.0001	1
GM2A_89-96	CTSZ_39-47	0.8321	0.0001	1
HEXB_391-400	CTSZ_39-47	0.8286	0.0001	1
LAMP1_138-146	CTSZ_39-47	0.8321	0.0001	1
LAMP2_153-161	CTSZ_39-47	0.8214	0.0002	1
LAMP2_281-289	CTSZ_39-47	0.8464	<.0001	1
DPP7_449-462	DPP7_113-123	0.8429	<.0001	1
DPP7_113-123	DPP7_40-47	0.8714	<.0001	1
FUCA1_114-130	DPP7_449-462	0.8143	0.0002	1
LAMP1_138-146	GM2A_170-179	0.8143	0.0002	1
LAMP2_133-144	GM2A_170-179	0.8214	0.0002	1
LAMP2_145-152	GM2A_170-179	0.8571	<.0001	1
GM2A_170-179	GM2A_89-96	0.9393	<.0001	1
LAMP1_138-146	GM2A_89-96	0.8071	0.0003	1
LAMP2_133-144	GM2A_89-96	0.8964	<.0001	1
LAMP2_145-152	GM2A_89-96	0.8393	<.0001	1
LAMP2_281-289	GM2A_89-96	0.8643	<.0001	1
Ubiquitin_12-27	GM2A_89-96	0.8893	<.0001	1
Ubiquitin_64-72	GM2A_89-96	0.8821	<.0001	1
HEXB_391-400	HEXB_285-300	0.9464	<.0001	1
LAMP2_133-144	HEXB_285-300	0.8786	<.0001	1
LAMP2_281-289	HEXB_285-300	0.8857	<.0001	1
TCN2_393-399	HEXB_285-300	0.8143	0.0002	1
TPP1_61-78	HEXB_285-300	0.8964	<.0001	1
LAMP2_133-144	HEXB_391-400	0.8429	<.0001	1
LAMP2_281-289	HEXB_391-400	0.8536	<.0001	1
LAMP1_327-337	LAMP1_138-146	0.8929	<.0001	1
LAMP1_357-363	LAMP1_138-146	0.9321	<.0001	1
LAMP2_133-144	LAMP1_138-146	0.8321	0.0001	1
LAMP2_145-152	LAMP1_138-146	0.9286	<.0001	1
LAMP2_153-161	LAMP1_138-146	0.85	<.0001	1
LAMP2_281-289	LAMP1_138-146	0.8214	0.0002	1
FUCA1_114-130	LAMP1_138-146	0.8536	<.0001	1
FUCA1_163-173	LAMP1_138-146	0.8571	<.0001	1
FUCA1_344-354	LAMP1_138-146	0.8429	<.0001	1
LAMP1_357-363	LAMP1_327-337	0.9357	<.0001	1
LAMP2_145-152	LAMP1_327-337	0.8679	<.0001	1
LAMP2_153-161	LAMP1_327-337	0.8571	<.0001	1
LAMP2_145-152	LAMP1_357-363	0.95	<.0001	1
LAMP2_153-161	LAMP1_357-363	0.8286	0.0001	1
FUCA1_114-130	LAMP1_357-363	0.8214	0.0002	1
FUCA1_163-173	LAMP1_357-363	0.8179	0.0002	1
FUCA1_344-354	LAMP1_357-363	0.8679	<.0001	1
LAMP2_145-152	LAMP2_133-144	0.8536	<.0001	1
LAMP2_281-289	LAMP2_133-144	0.9679	<.0001	1
TCN2_393-399	LAMP2_133-144	0.85	<.0001	1
Ubiquitin_12-27	LAMP2_133-144	0.8464	<.0001	1
Ubiquitin_64-72	LAMP2_133-144	0.8536	<.0001	1
LAMP2_153-161	LAMP2_145-152	0.8643	<.0001	1
LAMP2_281-289	LAMP2_145-152	0.8357	0.0001	1
FUCA1_114-130	LAMP2_145-152	0.8786	<.0001	1
FUCA1_163-173	LAMP2_145-152	0.8571	<.0001	1
FUCA1_344-354	LAMP2_145-152	0.8786	<.0001	1
FUCA1_114-130	LAMP2_153-161	0.8143	0.0002	1
FUCA1_163-173	LAMP2_153-161	0.875	<.0001	1
FUCA1_344-354	LAMP2_153-161	0.8357	0.0001	1
TCN2_300-313	LAMP2_281-289	0.8214	0.0002	1
TCN2_393-399	LAMP2_281-289	0.8321	0.0001	1
Ubiquitin_64-72	LAMP2_281-289	0.8071	0.0003	1
LYZ_69-80	LYZ_52-59	0.8607	<.0001	1
FUCA1_163-173	FUCA1_114-130	0.9679	<.0001	1
FUCA1_344-354	FUCA1_114-130	0.9464	<.0001	1
FUCA1_344-354	FUCA1_163-173	0.9571	<.0001	1
TCN2_393-399	TCN2_300-313	0.9036	<.0001	1
Ubiquitin_12-27	TCN2_393-399	0.8286	0.0001	1
Ubiquitin_64-72	TCN2_393-399	0.8357	0.0001	1
TCN2_300-313	TCN2_45-59	0.8393	<.0001	1
TCN2_393-399	TCN2_45-59	0.8643	<.0001	1
TPP1_246-259	TPP1_61-78	0.875	<.0001	1
TPP1_507-520	TPP1_61-78	0.8107	0.0002	1
Ubiquitin_64-72	Ubiquitin_12-27	0.9964	<.0001	1
AP2B1_712-719	Age	-0.4843	0.0674	0
AP2B1_835-842	Age	-0.4933	0.0617	0
AP2B1_868-878	Age	-0.4555	0.088	0
APP_289-301	Age	-0.6157	0.0145	0
APP_439-450	Age	-0.6679	0.0065	0
Aβ1-42 (ng/L)	Age	-0.6715	0.0061	0
BSA_421-433	Age	0.4627	0.0825	0
C9_146-154	Age	0.2772	0.3171	0
C9_186-194	Age	0.2556	0.3578	0
C9_232-242	Age	0.2502	0.3684	0
C9_473-483	Age	0.4087	0.1304	0
C9_497-508	Age	0.3114	0.2585	0
CTSB_210-220	Age	-0.4807	0.0697	0
CTSB_58-71	Age	-0.4627	0.0825	0
CTSB_80-87	Age	-0.351	0.1995	0
CTSD_112-122	Age	-0.315	0.2527	0
CTSD_349-357	Age	-0.3708	0.1736	0
CTSD_55-72	Age	-0.3312	0.2278	0
CatF_103-116	Age	-0.4429	0.0983	0
CatF_236-245	Age	-0.5707	0.0263	0
CatF_266-278	Age	-0.5095	0.0524	0
CatF_442-450	Age	-0.4753	0.0734	0
CTSL_105-116	Age	-0.5347	0.04	0
CTSZ_261-270	Age	-0.4879	0.0651	0
CTSZ_39-47	Age	-0.4537	0.0894	0
DPP7_113-123	Age	-0.3997	0.14	0
DPP7_40-47	Age	-0.6553	0.008	0
DPP7_449-462	Age	-0.5509	0.0333	0
GM2A_170-179	Age	-0.3384	0.2172	0
GM2A_89-96	Age	-0.3961	0.1439	0
HEXB_285-300	Age	-0.4717	0.0759	0
HEXB_391-400	Age	-0.5167	0.0486	0
LAMP1_138-146	Age	-0.4879	0.0651	0
LAMP1_327-337	Age	-0.342	0.2121	0
LAMP1_357-363	Age	-0.2556	0.3578	0
LAMP2_133-144	Age	-0.4015	0.138	0
LAMP2_145-152	Age	-0.3204	0.2442	0
LAMP2_153-161	Age	-0.4321	0.1078	0
LAMP2_281-289	Age	-0.3258	0.2359	0
LYZ_52-59	Age	-0.1926	0.4916	0
LYZ_69-80	Age	-0.2286	0.4124	0
P-tau (ng/L)	Age	-0.1753	0.5322	0
FUCA1_114-130	Age	-0.4141	0.1249	0
FUCA1_163-173	Age	-0.3997	0.14	0
FUCA1_344-354	Age	-0.3042	0.2702	0
TCN2_300-313	Age	-0.0756	0.7888	0
TCN2_393-399	Age	-0.1602	0.5684	0
TCN2_45-59	Age	-0.117	0.6779	0
TPP1_246-259	Age	-0.6067	0.0165	0
TPP1_507-520	Age	-0.4195	0.1196	0
TPP1_61-78	Age	-0.4663	0.0798	0
T-tau (ng/L)	Age	0.3708	0.1736	0
Ubiquitin_12-27	Age	-0.3799	0.1626	0
Ubiquitin_64-72	Age	-0.3835	0.1583	0
BSA_421-433	AP2B1_712-719	-0.3571	0.1913	0
C9_146-154	AP2B1_712-719	0.3179	0.2483	0
C9_186-194	AP2B1_712-719	0.3357	0.2212	0
C9_232-242	AP2B1_712-719	0.325	0.2372	0
C9_473-483	AP2B1_712-719	0.2107	0.451	0
C9_497-508	AP2B1_712-719	0.3071	0.2655	0
CTSB_210-220	AP2B1_712-719	0.7179	0.0026	0
CTSB_58-71	AP2B1_712-719	0.6286	0.0121	0
CTSB_80-87	AP2B1_712-719	0.7857	0.0005	0
CTSD_112-122	AP2B1_712-719	0.4571	0.0867	0
CTSD_349-357	AP2B1_712-719	0.575	0.0249	0
CTSD_55-72	AP2B1_712-719	0.4429	0.0983	0
CatF_103-116	AP2B1_712-719	0.75	0.0013	0
CatF_236-245	AP2B1_712-719	0.7964	0.0004	0
DPP7_113-123	AP2B1_712-719	0.6464	0.0092	0
DPP7_40-47	AP2B1_712-719	0.6071	0.0164	0
DPP7_449-462	AP2B1_712-719	0.6857	0.0048	0
HEXB_285-300	AP2B1_712-719	0.7679	0.0008	0
LAMP1_327-337	AP2B1_712-719	0.7893	0.0005	0
LYZ_52-59	AP2B1_712-719	0.6143	0.0148	0
LYZ_69-80	AP2B1_712-719	0.5786	0.0238	0
TCN2_300-313	AP2B1_712-719	0.6464	0.0092	0
TCN2_393-399	AP2B1_712-719	0.7321	0.0019	0
TCN2_45-59	AP2B1_712-719	0.5286	0.0428	0
TPP1_246-259	AP2B1_712-719	0.4571	0.0867	0
TPP1_507-520	AP2B1_712-719	0.5321	0.0412	0
TPP1_61-78	AP2B1_712-719	0.5679	0.0272	0
Ubiquitin_12-27	AP2B1_712-719	0.775	0.0007	0
Ubiquitin_64-72	AP2B1_712-719	0.7714	0.0008	0
APP_439-450	AP2B1_835-842	0.7964	0.0004	0
BSA_421-433	AP2B1_835-842	-0.4964	0.0598	0
C9_146-154	AP2B1_835-842	0.2214	0.4277	0
C9_186-194	AP2B1_835-842	0.2536	0.3618	0
C9_232-242	AP2B1_835-842	0.225	0.4201	0
C9_473-483	AP2B1_835-842	0.1036	0.7134	0
C9_497-508	AP2B1_835-842	0.2071	0.4588	0
CTSB_210-220	AP2B1_835-842	0.7821	0.0006	0
CTSB_58-71	AP2B1_835-842	0.4607	0.0839	0
CTSB_80-87	AP2B1_835-842	0.6286	0.0121	0
CTSD_112-122	AP2B1_835-842	0.3071	0.2655	0
CTSD_349-357	AP2B1_835-842	0.4929	0.062	0
CTSD_55-72	AP2B1_835-842	0.3143	0.2539	0
CatF_103-116	AP2B1_835-842	0.6214	0.0134	0
CatF_236-245	AP2B1_835-842	0.7393	0.0016	0
CatF_266-278	AP2B1_835-842	0.7536	0.0012	0
CatF_442-450	AP2B1_835-842	0.775	0.0007	0
CTSZ_261-270	AP2B1_835-842	0.725	0.0022	0
DPP7_113-123	AP2B1_835-842	0.5107	0.0517	0
DPP7_40-47	AP2B1_835-842	0.5143	0.0498	0
DPP7_449-462	AP2B1_835-842	0.5107	0.0517	0
HEXB_285-300	AP2B1_835-842	0.6893	0.0045	0
HEXB_391-400	AP2B1_835-842	0.7964	0.0004	0
LAMP1_138-146	AP2B1_835-842	0.7464	0.0014	0
LAMP1_327-337	AP2B1_835-842	0.675	0.0058	0
LAMP1_357-363	AP2B1_835-842	0.7286	0.0021	0
LAMP2_133-144	AP2B1_835-842	0.7964	0.0004	0
LAMP2_145-152	AP2B1_835-842	0.7964	0.0004	0
LAMP2_281-289	AP2B1_835-842	0.7964	0.0004	0
LYZ_52-59	AP2B1_835-842	0.4786	0.0711	0
LYZ_69-80	AP2B1_835-842	0.4393	0.1014	0
FUCA1_114-130	AP2B1_835-842	0.6929	0.0042	0
FUCA1_163-173	AP2B1_835-842	0.7429	0.0015	0
FUCA1_344-354	AP2B1_835-842	0.7143	0.0028	0
TCN2_300-313	AP2B1_835-842	0.6036	0.0172	0
TCN2_393-399	AP2B1_835-842	0.6786	0.0054	0
TCN2_45-59	AP2B1_835-842	0.5429	0.0365	0
TPP1_246-259	AP2B1_835-842	0.375	0.1684	0
TPP1_507-520	AP2B1_835-842	0.4607	0.0839	0
TPP1_61-78	AP2B1_835-842	0.4714	0.0761	0
Ubiquitin_12-27	AP2B1_835-842	0.7857	0.0005	0
Ubiquitin_64-72	AP2B1_835-842	0.775	0.0007	0
APP_439-450	AP2B1_868-878	0.7857	0.0005	0
BSA_421-433	AP2B1_868-878	-0.4107	0.1283	0
C9_146-154	AP2B1_868-878	0.3607	0.1866	0
C9_186-194	AP2B1_868-878	0.3929	0.1475	0
C9_232-242	AP2B1_868-878	0.35	0.2009	0
C9_473-483	AP2B1_868-878	0.2214	0.4277	0
C9_497-508	AP2B1_868-878	0.3179	0.2483	0
CTSB_210-220	AP2B1_868-878	0.6786	0.0054	0
CTSB_58-71	AP2B1_868-878	0.625	0.0127	0
CTSD_112-122	AP2B1_868-878	0.4393	0.1014	0
CTSD_349-357	AP2B1_868-878	0.5857	0.0218	0
CTSD_55-72	AP2B1_868-878	0.4393	0.1014	0
CatF_103-116	AP2B1_868-878	0.7	0.0037	0
CatF_236-245	AP2B1_868-878	0.7786	0.0006	0
CTSZ_39-47	AP2B1_868-878	0.7821	0.0006	0
DPP7_113-123	AP2B1_868-878	0.7036	0.0034	0
DPP7_40-47	AP2B1_868-878	0.6714	0.0061	0
DPP7_449-462	AP2B1_868-878	0.6929	0.0042	0
HEXB_285-300	AP2B1_868-878	0.6714	0.0061	0
HEXB_391-400	AP2B1_868-878	0.7571	0.0011	0
LAMP1_327-337	AP2B1_868-878	0.7929	0.0004	0
LAMP2_281-289	AP2B1_868-878	0.7929	0.0004	0
LYZ_52-59	AP2B1_868-878	0.6357	0.0109	0
LYZ_69-80	AP2B1_868-878	0.5214	0.0462	0
TCN2_300-313	AP2B1_868-878	0.5357	0.0396	0
TCN2_393-399	AP2B1_868-878	0.6107	0.0156	0
TCN2_45-59	AP2B1_868-878	0.4143	0.1247	0
TPP1_246-259	AP2B1_868-878	0.4036	0.1358	0
TPP1_507-520	AP2B1_868-878	0.5357	0.0396	0
TPP1_61-78	AP2B1_868-878	0.525	0.0445	0
Ubiquitin_12-27	AP2B1_868-878	0.6679	0.0065	0
Ubiquitin_64-72	AP2B1_868-878	0.6571	0.0078	0
BSA_421-433	APP_289-301	-0.3607	0.1866	0
C9_146-154	APP_289-301	0.1429	0.6115	0
C9_186-194	APP_289-301	0.1607	0.5672	0
C9_232-242	APP_289-301	0.1286	0.6479	0
C9_473-483	APP_289-301	0.0321	0.9095	0
C9_497-508	APP_289-301	0.1071	0.7039	0
CTSB_210-220	APP_289-301	0.6929	0.0042	0
CTSB_58-71	APP_289-301	0.6321	0.0115	0
CTSB_80-87	APP_289-301	0.7393	0.0016	0
CTSD_112-122	APP_289-301	0.4393	0.1014	0
CTSD_349-357	APP_289-301	0.4964	0.0598	0
CTSD_55-72	APP_289-301	0.4286	0.111	0
CatF_103-116	APP_289-301	0.6143	0.0148	0
CatF_236-245	APP_289-301	0.6214	0.0134	0
CatF_266-278	APP_289-301	0.6643	0.0069	0
CatF_442-450	APP_289-301	0.6857	0.0048	0
CTSL_105-116	APP_289-301	0.8	0.0003	0
DPP7_113-123	APP_289-301	0.6607	0.0073	0
DPP7_40-47	APP_289-301	0.6071	0.0164	0
DPP7_449-462	APP_289-301	0.7607	0.001	0
GM2A_170-179	APP_289-301	0.7036	0.0034	0
GM2A_89-96	APP_289-301	0.7286	0.0021	0
LAMP1_327-337	APP_289-301	0.7286	0.0021	0
LAMP1_357-363	APP_289-301	0.7286	0.0021	0
LAMP2_145-152	APP_289-301	0.7536	0.0012	0
LYZ_52-59	APP_289-301	0.4714	0.0761	0
LYZ_69-80	APP_289-301	0.4714	0.0761	0
FUCA1_114-130	APP_289-301	0.725	0.0022	0
FUCA1_163-173	APP_289-301	0.775	0.0007	0
FUCA1_344-354	APP_289-301	0.65	0.0087	0
TCN2_300-313	APP_289-301	0.4607	0.0839	0
TCN2_393-399	APP_289-301	0.5679	0.0272	0
TCN2_45-59	APP_289-301	0.3321	0.2265	0
TPP1_246-259	APP_289-301	0.7321	0.0019	0
TPP1_507-520	APP_289-301	0.675	0.0058	0
TPP1_61-78	APP_289-301	0.7107	0.003	0
Ubiquitin_12-27	APP_289-301	0.6321	0.0115	0
Ubiquitin_64-72	APP_289-301	0.65	0.0087	0
BSA_421-433	APP_439-450	-0.3714	0.1728	0
C9_146-154	APP_439-450	0.1393	0.6205	0
C9_186-194	APP_439-450	0.15	0.5936	0
C9_232-242	APP_439-450	0.1571	0.576	0
C9_473-483	APP_439-450	0.0429	0.8795	0
C9_497-508	APP_439-450	0.15	0.5936	0
CTSB_210-220	APP_439-450	0.7607	0.001	0
CTSB_58-71	APP_439-450	0.7714	0.0008	0
CTSB_80-87	APP_439-450	0.7464	0.0014	0
CTSD_112-122	APP_439-450	0.3286	0.2318	0
CTSD_349-357	APP_439-450	0.4536	0.0895	0
CTSD_55-72	APP_439-450	0.3357	0.2212	0
CatF_103-116	APP_439-450	0.5964	0.0189	0
CatF_236-245	APP_439-450	0.6393	0.0103	0
CatF_266-278	APP_439-450	0.7393	0.0016	0
CatF_442-450	APP_439-450	0.7286	0.0021	0
CTSZ_261-270	APP_439-450	0.7714	0.0008	0
CTSZ_39-47	APP_439-450	0.7393	0.0016	0
DPP7_113-123	APP_439-450	0.6821	0.0051	0
DPP7_40-47	APP_439-450	0.7464	0.0014	0
DPP7_449-462	APP_439-450	0.6821	0.0051	0
GM2A_170-179	APP_439-450	0.675	0.0058	0
GM2A_89-96	APP_439-450	0.7214	0.0024	0
HEXB_285-300	APP_439-450	0.7893	0.0005	0
LAMP1_357-363	APP_439-450	0.7821	0.0006	0
LAMP2_133-144	APP_439-450	0.7286	0.0021	0
LAMP2_145-152	APP_439-450	0.7643	0.0009	0
LAMP2_281-289	APP_439-450	0.6857	0.0048	0
LYZ_52-59	APP_439-450	0.3321	0.2265	0
LYZ_69-80	APP_439-450	0.3857	0.1556	0
FUCA1_114-130	APP_439-450	0.6679	0.0065	0
FUCA1_163-173	APP_439-450	0.7107	0.003	0
FUCA1_344-354	APP_439-450	0.6571	0.0078	0
TCN2_300-313	APP_439-450	0.4143	0.1247	0
TCN2_393-399	APP_439-450	0.5929	0.0198	0
TCN2_45-59	APP_439-450	0.2786	0.3147	0
TPP1_246-259	APP_439-450	0.7464	0.0014	0
TPP1_507-520	APP_439-450	0.75	0.0013	0
TPP1_61-78	APP_439-450	0.7286	0.0021	0
Ubiquitin_12-27	APP_439-450	0.65	0.0087	0
Ubiquitin_64-72	APP_439-450	0.6536	0.0082	0
AP2B1_712-719	Aβ1-42 (ng/L)	0.3536	0.1961	0
AP2B1_835-842	Aβ1-42 (ng/L)	0.4571	0.0867	0
AP2B1_868-878	Aβ1-42 (ng/L)	0.2607	0.348	0
APP_289-301	Aβ1-42 (ng/L)	0.4929	0.062	0
APP_439-450	Aβ1-42 (ng/L)	0.525	0.0445	0
BSA_421-433	Aβ1-42 (ng/L)	-0.2786	0.3147	0
C9_146-154	Aβ1-42 (ng/L)	-0.4107	0.1283	0
C9_186-194	Aβ1-42 (ng/L)	-0.4786	0.0711	0
C9_232-242	Aβ1-42 (ng/L)	-0.425	0.1143	0
C9_473-483	Aβ1-42 (ng/L)	-0.5286	0.0428	0
C9_497-508	Aβ1-42 (ng/L)	-0.4607	0.0839	0
CTSB_210-220	Aβ1-42 (ng/L)	0.525	0.0445	0
CTSB_58-71	Aβ1-42 (ng/L)	0.3036	0.2714	0
CTSB_80-87	Aβ1-42 (ng/L)	0.2821	0.3083	0
CTSD_112-122	Aβ1-42 (ng/L)	-0.0893	0.7517	0
CTSD_349-357	Aβ1-42 (ng/L)	-0.075	0.7905	0
CTSD_55-72	Aβ1-42 (ng/L)	-0.1179	0.6757	0
CatF_103-116	Aβ1-42 (ng/L)	0.2714	0.3278	0
CatF_236-245	Aβ1-42 (ng/L)	0.45	0.0924	0
CatF_266-278	Aβ1-42 (ng/L)	0.3679	0.1773	0
CatF_442-450	Aβ1-42 (ng/L)	0.3464	0.2059	0
CTSL_105-116	Aβ1-42 (ng/L)	0.3357	0.2212	0
CTSZ_261-270	Aβ1-42 (ng/L)	0.2	0.4748	0
CTSZ_39-47	Aβ1-42 (ng/L)	0.3321	0.2265	0
DPP7_113-123	Aβ1-42 (ng/L)	-0.0286	0.9195	0
DPP7_40-47	Aβ1-42 (ng/L)	0.2143	0.4431	0
DPP7_449-462	Aβ1-42 (ng/L)	0.1786	0.5243	0
GM2A_170-179	Aβ1-42 (ng/L)	0.2143	0.4431	0
GM2A_89-96	Aβ1-42 (ng/L)	0.3393	0.216	0
HEXB_285-300	Aβ1-42 (ng/L)	0.3179	0.2483	0
HEXB_391-400	Aβ1-42 (ng/L)	0.4214	0.1177	0
LAMP1_138-146	Aβ1-42 (ng/L)	0.1964	0.4829	0
LAMP1_327-337	Aβ1-42 (ng/L)	0.175	0.5327	0
LAMP1_357-363	Aβ1-42 (ng/L)	0.0429	0.8795	0
LAMP2_133-144	Aβ1-42 (ng/L)	0.2393	0.3904	0
LAMP2_145-152	Aβ1-42 (ng/L)	0.1607	0.5672	0
LAMP2_153-161	Aβ1-42 (ng/L)	0.3893	0.1515	0
LAMP2_281-289	Aβ1-42 (ng/L)	0.1821	0.5159	0
LYZ_52-59	Aβ1-42 (ng/L)	-0.0143	0.9597	0
LYZ_69-80	Aβ1-42 (ng/L)	0.0071	0.9798	0
P-tau (ng/L)	Aβ1-42 (ng/L)	0.2437	0.3814	0
FUCA1_114-130	Aβ1-42 (ng/L)	0.1429	0.6115	0
FUCA1_163-173	Aβ1-42 (ng/L)	0.175	0.5327	0
FUCA1_344-354	Aβ1-42 (ng/L)	0.0893	0.7517	0
TCN2_300-313	Aβ1-42 (ng/L)	0.0393	0.8894	0
TCN2_393-399	Aβ1-42 (ng/L)	0.15	0.5936	0
TCN2_45-59	Aβ1-42 (ng/L)	0.2071	0.4588	0
TPP1_246-259	Aβ1-42 (ng/L)	0.3536	0.1961	0
TPP1_507-520	Aβ1-42 (ng/L)	0.0393	0.8894	0
TPP1_61-78	Aβ1-42 (ng/L)	0.1179	0.6757	0
T-tau (ng/L)	Aβ1-42 (ng/L)	-0.4071	0.132	0
Ubiquitin_12-27	Aβ1-42 (ng/L)	0.3036	0.2714	0
Ubiquitin_64-72	Aβ1-42 (ng/L)	0.3	0.2773	0
C9_146-154	BSA_421-433	-0.2107	0.451	0
C9_186-194	BSA_421-433	-0.2929	0.2895	0
C9_232-242	BSA_421-433	-0.2143	0.4431	0
C9_473-483	BSA_421-433	-0.075	0.7905	0
C9_497-508	BSA_421-433	-0.1357	0.6296	0
CTSB_210-220	BSA_421-433	-0.4714	0.0761	0
CTSB_58-71	BSA_421-433	-0.1143	0.6851	0
CTSB_80-87	BSA_421-433	-0.2893	0.2957	0
CTSD_112-122	BSA_421-433	0	1	0
CTSD_349-357	BSA_421-433	-0.3607	0.1866	0
CTSD_55-72	BSA_421-433	-0.0464	0.8695	0
CatF_103-116	BSA_421-433	0	1	0
CatF_236-245	BSA_421-433	-0.2036	0.4668	0
CatF_266-278	BSA_421-433	-0.2071	0.4588	0
CatF_442-450	BSA_421-433	-0.1929	0.491	0
CTSL_105-116	BSA_421-433	-0.4214	0.1177	0
CTSZ_261-270	BSA_421-433	-0.3714	0.1728	0
CTSZ_39-47	BSA_421-433	-0.4643	0.0813	0
DPP7_113-123	BSA_421-433	-0.2464	0.376	0
DPP7_40-47	BSA_421-433	-0.2107	0.451	0
DPP7_449-462	BSA_421-433	-0.2321	0.4051	0
GM2A_170-179	BSA_421-433	-0.2071	0.4588	0
GM2A_89-96	BSA_421-433	-0.2143	0.4431	0
HEXB_285-300	BSA_421-433	-0.1464	0.6025	0
HEXB_391-400	BSA_421-433	-0.2143	0.4431	0
LAMP1_138-146	BSA_421-433	-0.3321	0.2265	0
LAMP1_327-337	BSA_421-433	-0.4286	0.111	0
LAMP1_357-363	BSA_421-433	-0.4036	0.1358	0
LAMP2_133-144	BSA_421-433	-0.1214	0.6664	0
LAMP2_145-152	BSA_421-433	-0.3357	0.2212	0
LAMP2_153-161	BSA_421-433	-0.4321	0.1077	0
LAMP2_281-289	BSA_421-433	-0.1714	0.5413	0
LYZ_52-59	BSA_421-433	-0.3643	0.1819	0
LYZ_69-80	BSA_421-433	-0.225	0.4201	0
FUCA1_114-130	BSA_421-433	-0.3929	0.1475	0
FUCA1_163-173	BSA_421-433	-0.375	0.1684	0
FUCA1_344-354	BSA_421-433	-0.4464	0.0953	0
TCN2_300-313	BSA_421-433	-0.1893	0.4993	0
TCN2_393-399	BSA_421-433	-0.0964	0.7325	0
TCN2_45-59	BSA_421-433	-0.1179	0.6757	0
TPP1_246-259	BSA_421-433	-0.2571	0.3549	0
TPP1_507-520	BSA_421-433	-0.1286	0.6479	0
TPP1_61-78	BSA_421-433	-0.2321	0.4051	0
Ubiquitin_12-27	BSA_421-433	-0.2179	0.4354	0
Ubiquitin_64-72	BSA_421-433	-0.2143	0.4431	0
CTSB_210-220	C9_146-154	0.3786	0.1641	0
CTSB_58-71	C9_146-154	0.3571	0.1913	0
CTSB_80-87	C9_146-154	0.375	0.1684	0
CTSD_112-122	C9_146-154	0.5179	0.048	0
CTSD_349-357	C9_146-154	0.7107	0.003	0
CTSD_55-72	C9_146-154	0.5357	0.0396	0
CatF_103-116	C9_146-154	0.2107	0.451	0
CatF_236-245	C9_146-154	0.1536	0.5848	0
CatF_266-278	C9_146-154	0.1714	0.5413	0
CatF_442-450	C9_146-154	0.2536	0.3618	0
CTSL_105-116	C9_146-154	0.35	0.2009	0
CTSZ_261-270	C9_146-154	0.4607	0.0839	0
CTSZ_39-47	C9_146-154	0.3643	0.1819	0
DPP7_113-123	C9_146-154	0.4857	0.0664	0
DPP7_40-47	C9_146-154	0.2357	0.3977	0
DPP7_449-462	C9_146-154	0.1893	0.4993	0
GM2A_170-179	C9_146-154	0.2821	0.3083	0
GM2A_89-96	C9_146-154	0.25	0.3688	0
HEXB_285-300	C9_146-154	0.3357	0.2212	0
HEXB_391-400	C9_146-154	0.2821	0.3083	0
LAMP1_138-146	C9_146-154	0.4607	0.0839	0
LAMP1_327-337	C9_146-154	0.4036	0.1358	0
LAMP1_357-363	C9_146-154	0.6036	0.0172	0
LAMP2_133-144	C9_146-154	0.2893	0.2957	0
LAMP2_145-152	C9_146-154	0.5179	0.048	0
LAMP2_153-161	C9_146-154	0.3036	0.2714	0
LAMP2_281-289	C9_146-154	0.4143	0.1247	0
LYZ_52-59	C9_146-154	0.6071	0.0164	0
LYZ_69-80	C9_146-154	0.6393	0.0103	0
FUCA1_114-130	C9_146-154	0.5536	0.0323	0
FUCA1_163-173	C9_146-154	0.5143	0.0498	0
FUCA1_344-354	C9_146-154	0.6714	0.0061	0
TCN2_300-313	C9_146-154	0.4964	0.0598	0
TCN2_393-399	C9_146-154	0.3143	0.2539	0
TCN2_45-59	C9_146-154	0.1929	0.491	0
TPP1_246-259	C9_146-154	0.1607	0.5672	0
TPP1_507-520	C9_146-154	0.3429	0.2109	0
TPP1_61-78	C9_146-154	0.3821	0.1598	0
Ubiquitin_12-27	C9_146-154	0.1429	0.6115	0
Ubiquitin_64-72	C9_146-154	0.125	0.6571	0
CTSB_210-220	C9_186-194	0.3679	0.1773	0
CTSB_58-71	C9_186-194	0.325	0.2372	0
CTSB_80-87	C9_186-194	0.375	0.1684	0
CTSD_112-122	C9_186-194	0.5214	0.0462	0
CTSD_349-357	C9_186-194	0.725	0.0022	0
CTSD_55-72	C9_186-194	0.5429	0.0365	0
CatF_103-116	C9_186-194	0.2143	0.4431	0
CatF_236-245	C9_186-194	0.15	0.5936	0
CatF_266-278	C9_186-194	0.1857	0.5075	0
CatF_442-450	C9_186-194	0.2714	0.3278	0
CTSL_105-116	C9_186-194	0.3857	0.1556	0
CTSZ_261-270	C9_186-194	0.4929	0.062	0
CTSZ_39-47	C9_186-194	0.4071	0.132	0
DPP7_113-123	C9_186-194	0.5179	0.048	0
DPP7_40-47	C9_186-194	0.2607	0.348	0
DPP7_449-462	C9_186-194	0.225	0.4201	0
GM2A_170-179	C9_186-194	0.3214	0.2427	0
GM2A_89-96	C9_186-194	0.275	0.3212	0
HEXB_285-300	C9_186-194	0.3286	0.2318	0
HEXB_391-400	C9_186-194	0.275	0.3212	0
LAMP1_138-146	C9_186-194	0.475	0.0736	0
LAMP1_327-337	C9_186-194	0.4464	0.0953	0
LAMP1_357-363	C9_186-194	0.6286	0.0121	0
LAMP2_133-144	C9_186-194	0.2929	0.2895	0
LAMP2_145-152	C9_186-194	0.5179	0.048	0
LAMP2_153-161	C9_186-194	0.3	0.2773	0
LAMP2_281-289	C9_186-194	0.425	0.1143	0
LYZ_52-59	C9_186-194	0.6321	0.0115	0
LYZ_69-80	C9_186-194	0.6429	0.0097	0
FUCA1_114-130	C9_186-194	0.5429	0.0365	0
FUCA1_163-173	C9_186-194	0.5071	0.0537	0
FUCA1_344-354	C9_186-194	0.6571	0.0078	0
TCN2_300-313	C9_186-194	0.4929	0.062	0
TCN2_393-399	C9_186-194	0.325	0.2372	0
TCN2_45-59	C9_186-194	0.2036	0.4668	0
TPP1_246-259	C9_186-194	0.1571	0.576	0
TPP1_507-520	C9_186-194	0.3857	0.1556	0
TPP1_61-78	C9_186-194	0.4107	0.1283	0
Ubiquitin_12-27	C9_186-194	0.1821	0.5159	0
Ubiquitin_64-72	C9_186-194	0.1679	0.5499	0
CTSB_210-220	C9_232-242	0.3786	0.1641	0
CTSB_58-71	C9_232-242	0.3607	0.1866	0
CTSB_80-87	C9_232-242	0.35	0.2009	0
CTSD_112-122	C9_232-242	0.5286	0.0428	0
CTSD_349-357	C9_232-242	0.725	0.0022	0
CTSD_55-72	C9_232-242	0.5464	0.0351	0
CatF_103-116	C9_232-242	0.2286	0.4126	0
CatF_236-245	C9_232-242	0.1607	0.5672	0
CatF_266-278	C9_232-242	0.1821	0.5159	0
CatF_442-450	C9_232-242	0.2643	0.3412	0
CTSL_105-116	C9_232-242	0.3786	0.1641	0
CTSZ_261-270	C9_232-242	0.45	0.0924	0
CTSZ_39-47	C9_232-242	0.3714	0.1728	0
DPP7_113-123	C9_232-242	0.5036	0.0557	0
DPP7_40-47	C9_232-242	0.2714	0.3278	0
DPP7_449-462	C9_232-242	0.2	0.4748	0
GM2A_170-179	C9_232-242	0.275	0.3212	0
GM2A_89-96	C9_232-242	0.2643	0.3412	0
HEXB_285-300	C9_232-242	0.35	0.2009	0
HEXB_391-400	C9_232-242	0.2893	0.2957	0
LAMP1_138-146	C9_232-242	0.4714	0.0761	0
LAMP1_327-337	C9_232-242	0.4143	0.1247	0
LAMP1_357-363	C9_232-242	0.6179	0.0141	0
LAMP2_133-144	C9_232-242	0.3036	0.2714	0
LAMP2_145-152	C9_232-242	0.5286	0.0428	0
LAMP2_153-161	C9_232-242	0.2929	0.2895	0
LAMP2_281-289	C9_232-242	0.425	0.1143	0
LYZ_52-59	C9_232-242	0.5964	0.0189	0
LYZ_69-80	C9_232-242	0.6643	0.0069	0
FUCA1_114-130	C9_232-242	0.5536	0.0323	0
FUCA1_163-173	C9_232-242	0.4929	0.062	0
FUCA1_344-354	C9_232-242	0.6607	0.0073	0
TCN2_300-313	C9_232-242	0.5464	0.0351	0
TCN2_393-399	C9_232-242	0.3607	0.1866	0
TCN2_45-59	C9_232-242	0.2214	0.4277	0
TPP1_246-259	C9_232-242	0.175	0.5327	0
TPP1_507-520	C9_232-242	0.375	0.1684	0
TPP1_61-78	C9_232-242	0.3964	0.1435	0
Ubiquitin_12-27	C9_232-242	0.1786	0.5243	0
Ubiquitin_64-72	C9_232-242	0.1571	0.576	0
CTSB_210-220	C9_473-483	0.2571	0.3549	0
CTSB_58-71	C9_473-483	0.2893	0.2957	0
CTSB_80-87	C9_473-483	0.2536	0.3618	0
CTSD_112-122	C9_473-483	0.4964	0.0598	0
CTSD_349-357	C9_473-483	0.625	0.0127	0
CTSD_55-72	C9_473-483	0.5036	0.0557	0
CatF_103-116	C9_473-483	0.1679	0.5499	0
CatF_236-245	C9_473-483	0.0286	0.9195	0
CatF_266-278	C9_473-483	0.0821	0.771	0
CatF_442-450	C9_473-483	0.1679	0.5499	0
CTSL_105-116	C9_473-483	0.2607	0.348	0
CTSZ_261-270	C9_473-483	0.3429	0.2109	0
CTSZ_39-47	C9_473-483	0.2786	0.3147	0
DPP7_113-123	C9_473-483	0.4	0.1396	0
DPP7_40-47	C9_473-483	0.1429	0.6115	0
DPP7_449-462	C9_473-483	0.0929	0.742	0
GM2A_170-179	C9_473-483	0.2036	0.4668	0
GM2A_89-96	C9_473-483	0.1893	0.4993	0
HEXB_285-300	C9_473-483	0.2929	0.2895	0
HEXB_391-400	C9_473-483	0.1929	0.491	0
LAMP1_138-146	C9_473-483	0.3714	0.1728	0
LAMP1_327-337	C9_473-483	0.3286	0.2318	0
LAMP1_357-363	C9_473-483	0.5357	0.0396	0
LAMP2_133-144	C9_473-483	0.2393	0.3904	0
LAMP2_145-152	C9_473-483	0.4357	0.1045	0
LAMP2_153-161	C9_473-483	0.1714	0.5413	0
LAMP2_281-289	C9_473-483	0.3714	0.1728	0
LYZ_52-59	C9_473-483	0.5107	0.0517	0
LYZ_69-80	C9_473-483	0.6214	0.0134	0
FUCA1_114-130	C9_473-483	0.4214	0.1177	0
FUCA1_163-173	C9_473-483	0.3571	0.1913	0
FUCA1_344-354	C9_473-483	0.5214	0.0462	0
TCN2_300-313	C9_473-483	0.5143	0.0498	0
TCN2_393-399	C9_473-483	0.3321	0.2265	0
TCN2_45-59	C9_473-483	0.2	0.4748	0
TPP1_246-259	C9_473-483	0.1214	0.6664	0
TPP1_507-520	C9_473-483	0.3107	0.2597	0
TPP1_61-78	C9_473-483	0.3536	0.1961	0
Ubiquitin_12-27	C9_473-483	0.1429	0.6115	0
Ubiquitin_64-72	C9_473-483	0.125	0.6571	0
CTSB_210-220	C9_497-508	0.3286	0.2318	0
CTSB_58-71	C9_497-508	0.3571	0.1913	0
CTSB_80-87	C9_497-508	0.3179	0.2483	0
CTSD_112-122	C9_497-508	0.5179	0.048	0
CTSD_349-357	C9_497-508	0.6643	0.0069	0
CTSD_55-72	C9_497-508	0.5286	0.0428	0
CatF_103-116	C9_497-508	0.2464	0.376	0
CatF_236-245	C9_497-508	0.1179	0.6757	0
CatF_266-278	C9_497-508	0.1893	0.4993	0
CatF_442-450	C9_497-508	0.2607	0.348	0
CTSL_105-116	C9_497-508	0.3643	0.1819	0
CTSZ_261-270	C9_497-508	0.3893	0.1515	0
CTSZ_39-47	C9_497-508	0.3357	0.2212	0
DPP7_113-123	C9_497-508	0.4786	0.0711	0
DPP7_40-47	C9_497-508	0.25	0.3688	0
DPP7_449-462	C9_497-508	0.1714	0.5413	0
GM2A_170-179	C9_497-508	0.2821	0.3083	0
GM2A_89-96	C9_497-508	0.2786	0.3147	0
HEXB_285-300	C9_497-508	0.3571	0.1913	0
HEXB_391-400	C9_497-508	0.2679	0.3344	0
LAMP1_138-146	C9_497-508	0.45	0.0924	0
LAMP1_327-337	C9_497-508	0.4107	0.1283	0
LAMP1_357-363	C9_497-508	0.6179	0.0141	0
LAMP2_133-144	C9_497-508	0.3214	0.2427	0
LAMP2_145-152	C9_497-508	0.5321	0.0412	0
LAMP2_153-161	C9_497-508	0.2536	0.3618	0
LAMP2_281-289	C9_497-508	0.4393	0.1014	0
LYZ_52-59	C9_497-508	0.55	0.0337	0
LYZ_69-80	C9_497-508	0.6714	0.0061	0
FUCA1_114-130	C9_497-508	0.5071	0.0537	0
FUCA1_163-173	C9_497-508	0.4286	0.111	0
FUCA1_344-354	C9_497-508	0.5964	0.0189	0
TCN2_300-313	C9_497-508	0.5929	0.0198	0
TCN2_393-399	C9_497-508	0.4143	0.1247	0
TCN2_45-59	C9_497-508	0.25	0.3688	0
TPP1_246-259	C9_497-508	0.1821	0.5159	0
TPP1_507-520	C9_497-508	0.375	0.1684	0
TPP1_61-78	C9_497-508	0.3929	0.1475	0
Ubiquitin_12-27	C9_497-508	0.2286	0.4126	0
Ubiquitin_64-72	C9_497-508	0.2036	0.4668	0
CTSD_112-122	CTSB_210-220	0.3786	0.1641	0
CTSD_349-357	CTSB_210-220	0.6	0.0181	0
CTSD_55-72	CTSB_210-220	0.3857	0.1556	0
CatF_103-116	CTSB_210-220	0.5357	0.0396	0
CatF_236-245	CTSB_210-220	0.7214	0.0024	0
CatF_266-278	CTSB_210-220	0.65	0.0087	0
CatF_442-450	CTSB_210-220	0.6643	0.0069	0
CTSZ_261-270	CTSB_210-220	0.7071	0.0032	0
CTSZ_39-47	CTSB_210-220	0.7786	0.0006	0
DPP7_113-123	CTSB_210-220	0.4286	0.111	0
DPP7_40-47	CTSB_210-220	0.5071	0.0537	0
DPP7_449-462	CTSB_210-220	0.3571	0.1913	0
GM2A_170-179	CTSB_210-220	0.5143	0.0498	0
GM2A_89-96	CTSB_210-220	0.6571	0.0078	0
HEXB_285-300	CTSB_210-220	0.7607	0.001	0
LAMP1_138-146	CTSB_210-220	0.6286	0.0121	0
LAMP1_327-337	CTSB_210-220	0.5786	0.0238	0
LAMP1_357-363	CTSB_210-220	0.5929	0.0198	0
LAMP2_133-144	CTSB_210-220	0.5786	0.0238	0
LAMP2_145-152	CTSB_210-220	0.5714	0.0261	0
LAMP2_153-161	CTSB_210-220	0.6893	0.0045	0
LAMP2_281-289	CTSB_210-220	0.625	0.0127	0
LYZ_52-59	CTSB_210-220	0.3643	0.1819	0
LYZ_69-80	CTSB_210-220	0.4321	0.1077	0
FUCA1_114-130	CTSB_210-220	0.5714	0.0261	0
FUCA1_163-173	CTSB_210-220	0.6393	0.0103	0
FUCA1_344-354	CTSB_210-220	0.6536	0.0082	0
TCN2_300-313	CTSB_210-220	0.5393	0.038	0
TCN2_393-399	CTSB_210-220	0.6179	0.0141	0
TCN2_45-59	CTSB_210-220	0.5464	0.0351	0
TPP1_246-259	CTSB_210-220	0.4964	0.0598	0
TPP1_507-520	CTSB_210-220	0.6036	0.0172	0
TPP1_61-78	CTSB_210-220	0.6357	0.0109	0
Ubiquitin_12-27	CTSB_210-220	0.6071	0.0164	0
Ubiquitin_64-72	CTSB_210-220	0.6036	0.0172	0
CTSB_210-220	CTSB_58-71	0.5679	0.0272	0
CTSD_112-122	CTSB_58-71	0.5357	0.0396	0
CTSD_349-357	CTSB_58-71	0.4857	0.0664	0
CTSD_55-72	CTSB_58-71	0.5179	0.048	0
CatF_103-116	CTSB_58-71	0.7179	0.0026	0
CatF_236-245	CTSB_58-71	0.6071	0.0164	0
CatF_266-278	CTSB_58-71	0.7536	0.0012	0
CatF_442-450	CTSB_58-71	0.775	0.0007	0
CTSL_105-116	CTSB_58-71	0.6821	0.0051	0
CTSZ_261-270	CTSB_58-71	0.7071	0.0032	0
CTSZ_39-47	CTSB_58-71	0.5643	0.0284	0
DPP7_113-123	CTSB_58-71	0.6179	0.0141	0
DPP7_40-47	CTSB_58-71	0.725	0.0022	0
DPP7_449-462	CTSB_58-71	0.5929	0.0198	0
GM2A_170-179	CTSB_58-71	0.6607	0.0073	0
GM2A_89-96	CTSB_58-71	0.6679	0.0065	0
HEXB_285-300	CTSB_58-71	0.7071	0.0032	0
HEXB_391-400	CTSB_58-71	0.6214	0.0134	0
LAMP1_327-337	CTSB_58-71	0.7893	0.0005	0
LAMP1_357-363	CTSB_58-71	0.7357	0.0018	0
LAMP2_133-144	CTSB_58-71	0.6286	0.0121	0
LAMP2_145-152	CTSB_58-71	0.7321	0.0019	0
LAMP2_153-161	CTSB_58-71	0.6679	0.0065	0
LAMP2_281-289	CTSB_58-71	0.5679	0.0272	0
LYZ_52-59	CTSB_58-71	0.4464	0.0953	0
LYZ_69-80	CTSB_58-71	0.5714	0.0261	0
FUCA1_114-130	CTSB_58-71	0.6286	0.0121	0
FUCA1_163-173	CTSB_58-71	0.625	0.0127	0
FUCA1_344-354	CTSB_58-71	0.6286	0.0121	0
TCN2_300-313	CTSB_58-71	0.3357	0.2212	0
TCN2_393-399	CTSB_58-71	0.4893	0.0642	0
TCN2_45-59	CTSB_58-71	0.2286	0.4126	0
TPP1_246-259	CTSB_58-71	0.7214	0.0024	0
TPP1_507-520	CTSB_58-71	0.5964	0.0189	0
TPP1_61-78	CTSB_58-71	0.7321	0.0019	0
Ubiquitin_12-27	CTSB_58-71	0.5286	0.0428	0
Ubiquitin_64-72	CTSB_58-71	0.525	0.0445	0
CTSB_210-220	CTSB_80-87	0.5393	0.038	0
CTSD_112-122	CTSB_80-87	0.3536	0.1961	0
CTSD_349-357	CTSB_80-87	0.3964	0.1435	0
CTSD_55-72	CTSB_80-87	0.3071	0.2655	0
CatF_103-116	CTSB_80-87	0.6393	0.0103	0
CatF_236-245	CTSB_80-87	0.625	0.0127	0
CatF_266-278	CTSB_80-87	0.7107	0.003	0
CatF_442-450	CTSB_80-87	0.7964	0.0004	0
CTSL_105-116	CTSB_80-87	0.7107	0.003	0
CTSZ_39-47	CTSB_80-87	0.7286	0.0021	0
DPP7_113-123	CTSB_80-87	0.6857	0.0048	0
DPP7_40-47	CTSB_80-87	0.6	0.0181	0
DPP7_449-462	CTSB_80-87	0.7714	0.0008	0
GM2A_170-179	CTSB_80-87	0.775	0.0007	0
GM2A_89-96	CTSB_80-87	0.7429	0.0015	0
HEXB_285-300	CTSB_80-87	0.5857	0.0218	0
HEXB_391-400	CTSB_80-87	0.6036	0.0172	0
LAMP2_133-144	CTSB_80-87	0.6679	0.0065	0
LAMP2_281-289	CTSB_80-87	0.65	0.0087	0
LYZ_52-59	CTSB_80-87	0.6929	0.0042	0
LYZ_69-80	CTSB_80-87	0.5571	0.031	0
FUCA1_114-130	CTSB_80-87	0.7929	0.0004	0
FUCA1_344-354	CTSB_80-87	0.7857	0.0005	0
TCN2_300-313	CTSB_80-87	0.3786	0.1641	0
TCN2_393-399	CTSB_80-87	0.4929	0.062	0
TCN2_45-59	CTSB_80-87	0.2393	0.3904	0
TPP1_246-259	CTSB_80-87	0.5107	0.0517	0
TPP1_507-520	CTSB_80-87	0.4714	0.0761	0
TPP1_61-78	CTSB_80-87	0.5179	0.048	0
Ubiquitin_12-27	CTSB_80-87	0.4429	0.0983	0
Ubiquitin_64-72	CTSB_80-87	0.4464	0.0953	0
CatF_103-116	CTSD_112-122	0.7143	0.0028	0
CatF_236-245	CTSD_112-122	0.5214	0.0462	0
CatF_266-278	CTSD_112-122	0.4857	0.0664	0
CatF_442-450	CTSD_112-122	0.5429	0.0365	0
CTSL_105-116	CTSD_112-122	0.4821	0.0687	0
CTSZ_261-270	CTSD_112-122	0.6107	0.0156	0
CTSZ_39-47	CTSD_112-122	0.4929	0.062	0
DPP7_113-123	CTSD_112-122	0.5536	0.0323	0
DPP7_40-47	CTSD_112-122	0.5536	0.0323	0
DPP7_449-462	CTSD_112-122	0.5143	0.0498	0
GM2A_170-179	CTSD_112-122	0.475	0.0736	0
GM2A_89-96	CTSD_112-122	0.4893	0.0642	0
HEXB_285-300	CTSD_112-122	0.6857	0.0048	0
HEXB_391-400	CTSD_112-122	0.5607	0.0297	0
LAMP1_138-146	CTSD_112-122	0.5714	0.0261	0
LAMP1_327-337	CTSD_112-122	0.2714	0.3278	0
LAMP1_357-363	CTSD_112-122	0.4143	0.1247	0
LAMP2_133-144	CTSD_112-122	0.6107	0.0156	0
LAMP2_145-152	CTSD_112-122	0.475	0.0736	0
LAMP2_153-161	CTSD_112-122	0.2464	0.376	0
LAMP2_281-289	CTSD_112-122	0.6786	0.0054	0
LYZ_52-59	CTSD_112-122	0.6214	0.0134	0
FUCA1_114-130	CTSD_112-122	0.5857	0.0218	0
FUCA1_163-173	CTSD_112-122	0.5107	0.0517	0
FUCA1_344-354	CTSD_112-122	0.4714	0.0761	0
TCN2_300-313	CTSD_112-122	0.5179	0.048	0
TCN2_393-399	CTSD_112-122	0.4036	0.1358	0
TCN2_45-59	CTSD_112-122	0.3929	0.1475	0
TPP1_246-259	CTSD_112-122	0.5464	0.0351	0
TPP1_507-520	CTSD_112-122	0.5393	0.038	0
TPP1_61-78	CTSD_112-122	0.6821	0.0051	0
Ubiquitin_12-27	CTSD_112-122	0.45	0.0924	0
Ubiquitin_64-72	CTSD_112-122	0.4464	0.0953	0
CatF_103-116	CTSD_349-357	0.5107	0.0517	0
CatF_236-245	CTSD_349-357	0.5107	0.0517	0
CatF_266-278	CTSD_349-357	0.4286	0.111	0
CatF_442-450	CTSD_349-357	0.5	0.0577	0
CTSL_105-116	CTSD_349-357	0.6429	0.0097	0
CTSZ_261-270	CTSD_349-357	0.7357	0.0018	0
CTSZ_39-47	CTSD_349-357	0.6179	0.0141	0
DPP7_113-123	CTSD_349-357	0.6964	0.0039	0
DPP7_40-47	CTSD_349-357	0.6321	0.0115	0
DPP7_449-462	CTSD_349-357	0.5071	0.0537	0
GM2A_170-179	CTSD_349-357	0.4536	0.0895	0
GM2A_89-96	CTSD_349-357	0.4607	0.0839	0
HEXB_285-300	CTSD_349-357	0.6393	0.0103	0
HEXB_391-400	CTSD_349-357	0.6143	0.0148	0
LAMP1_138-146	CTSD_349-357	0.675	0.0058	0
LAMP1_327-337	CTSD_349-357	0.4143	0.1247	0
LAMP1_357-363	CTSD_349-357	0.6	0.0181	0
LAMP2_133-144	CTSD_349-357	0.5464	0.0351	0
LAMP2_145-152	CTSD_349-357	0.5786	0.0238	0
LAMP2_153-161	CTSD_349-357	0.4	0.1396	0
LAMP2_281-289	CTSD_349-357	0.6429	0.0097	0
LYZ_52-59	CTSD_349-357	0.6714	0.0061	0
LYZ_69-80	CTSD_349-357	0.7679	0.0008	0
FUCA1_114-130	CTSD_349-357	0.7179	0.0026	0
FUCA1_163-173	CTSD_349-357	0.6714	0.0061	0
FUCA1_344-354	CTSD_349-357	0.7179	0.0026	0
TCN2_300-313	CTSD_349-357	0.5179	0.048	0
TCN2_393-399	CTSD_349-357	0.375	0.1684	0
TCN2_45-59	CTSD_349-357	0.2964	0.2834	0
TPP1_246-259	CTSD_349-357	0.4714	0.0761	0
TPP1_507-520	CTSD_349-357	0.6286	0.0121	0
TPP1_61-78	CTSD_349-357	0.6679	0.0065	0
Ubiquitin_12-27	CTSD_349-357	0.4	0.1396	0
Ubiquitin_64-72	CTSD_349-357	0.3893	0.1515	0
CatF_103-116	CTSD_55-72	0.6821	0.0051	0
CatF_236-245	CTSD_55-72	0.5036	0.0557	0
CatF_266-278	CTSD_55-72	0.4857	0.0664	0
CatF_442-450	CTSD_55-72	0.5071	0.0537	0
CTSL_105-116	CTSD_55-72	0.4821	0.0687	0
CTSZ_261-270	CTSD_55-72	0.5821	0.0228	0
CTSZ_39-47	CTSD_55-72	0.4536	0.0895	0
DPP7_113-123	CTSD_55-72	0.5464	0.0351	0
DPP7_40-47	CTSD_55-72	0.5571	0.031	0
DPP7_449-462	CTSD_55-72	0.4714	0.0761	0
GM2A_170-179	CTSD_55-72	0.45	0.0924	0
GM2A_89-96	CTSD_55-72	0.4571	0.0867	0
HEXB_285-300	CTSD_55-72	0.6893	0.0045	0
HEXB_391-400	CTSD_55-72	0.5607	0.0297	0
LAMP1_138-146	CTSD_55-72	0.5607	0.0297	0
LAMP1_327-337	CTSD_55-72	0.2536	0.3618	0
LAMP1_357-363	CTSD_55-72	0.4179	0.1212	0
LAMP2_133-144	CTSD_55-72	0.6071	0.0164	0
LAMP2_145-152	CTSD_55-72	0.4714	0.0761	0
LAMP2_153-161	CTSD_55-72	0.2464	0.376	0
LAMP2_281-289	CTSD_55-72	0.6607	0.0073	0
LYZ_52-59	CTSD_55-72	0.5571	0.031	0
LYZ_69-80	CTSD_55-72	0.7857	0.0005	0
FUCA1_114-130	CTSD_55-72	0.5786	0.0238	0
FUCA1_163-173	CTSD_55-72	0.5107	0.0517	0
FUCA1_344-354	CTSD_55-72	0.4857	0.0664	0
TCN2_300-313	CTSD_55-72	0.5179	0.048	0
TCN2_393-399	CTSD_55-72	0.4036	0.1358	0
TCN2_45-59	CTSD_55-72	0.3821	0.1598	0
TPP1_246-259	CTSD_55-72	0.5679	0.0272	0
TPP1_507-520	CTSD_55-72	0.5607	0.0297	0
TPP1_61-78	CTSD_55-72	0.7107	0.003	0
Ubiquitin_12-27	CTSD_55-72	0.4607	0.0839	0
Ubiquitin_64-72	CTSD_55-72	0.4571	0.0867	0
CTSL_105-116	CatF_103-116	0.7464	0.0014	0
CTSZ_261-270	CatF_103-116	0.6643	0.0069	0
CTSZ_39-47	CatF_103-116	0.6714	0.0061	0
DPP7_113-123	CatF_103-116	0.4214	0.1177	0
DPP7_40-47	CatF_103-116	0.5571	0.031	0
DPP7_449-462	CatF_103-116	0.5679	0.0272	0
GM2A_170-179	CatF_103-116	0.8	0.0003	0
HEXB_285-300	CatF_103-116	0.8	0.0003	0
HEXB_391-400	CatF_103-116	0.75	0.0013	0
LAMP1_138-146	CatF_103-116	0.7036	0.0034	0
LAMP1_327-337	CatF_103-116	0.55	0.0337	0
LAMP1_357-363	CatF_103-116	0.55	0.0337	0
LAMP2_145-152	CatF_103-116	0.6964	0.0039	0
LAMP2_153-161	CatF_103-116	0.625	0.0127	0
LYZ_52-59	CatF_103-116	0.5214	0.0462	0
LYZ_69-80	CatF_103-116	0.675	0.0058	0
FUCA1_114-130	CatF_103-116	0.6357	0.0109	0
FUCA1_163-173	CatF_103-116	0.6214	0.0134	0
FUCA1_344-354	CatF_103-116	0.5429	0.0365	0
TCN2_300-313	CatF_103-116	0.6571	0.0078	0
TCN2_393-399	CatF_103-116	0.7536	0.0012	0
TCN2_45-59	CatF_103-116	0.7071	0.0032	0
TPP1_246-259	CatF_103-116	0.5107	0.0517	0
TPP1_507-520	CatF_103-116	0.4357	0.1045	0
TPP1_61-78	CatF_103-116	0.6214	0.0134	0
Ubiquitin_12-27	CatF_103-116	0.7929	0.0004	0
Ubiquitin_64-72	CatF_103-116	0.7893	0.0005	0
CTSZ_261-270	CatF_236-245	0.7036	0.0034	0
CTSZ_39-47	CatF_236-245	0.7286	0.0021	0
DPP7_113-123	CatF_236-245	0.3893	0.1515	0
DPP7_40-47	CatF_236-245	0.5607	0.0297	0
DPP7_449-462	CatF_236-245	0.5393	0.038	0
GM2A_170-179	CatF_236-245	0.7179	0.0026	0
HEXB_285-300	CatF_236-245	0.7286	0.0021	0
LAMP1_138-146	CatF_236-245	0.6571	0.0078	0
LAMP1_327-337	CatF_236-245	0.5286	0.0428	0
LAMP1_357-363	CatF_236-245	0.5	0.0577	0
LAMP2_133-144	CatF_236-245	0.7714	0.0008	0
LAMP2_145-152	CatF_236-245	0.6357	0.0109	0
LAMP2_153-161	CatF_236-245	0.725	0.0022	0
LAMP2_281-289	CatF_236-245	0.7179	0.0026	0
LYZ_52-59	CatF_236-245	0.4714	0.0761	0
LYZ_69-80	CatF_236-245	0.4821	0.0687	0
FUCA1_114-130	CatF_236-245	0.675	0.0058	0
FUCA1_163-173	CatF_236-245	0.7179	0.0026	0
FUCA1_344-354	CatF_236-245	0.65	0.0087	0
TCN2_300-313	CatF_236-245	0.5821	0.0228	0
TCN2_393-399	CatF_236-245	0.6964	0.0039	0
TCN2_45-59	CatF_236-245	0.7036	0.0034	0
TPP1_246-259	CatF_236-245	0.3643	0.1819	0
TPP1_507-520	CatF_236-245	0.4107	0.1283	0
TPP1_61-78	CatF_236-245	0.5071	0.0537	0
Ubiquitin_12-27	CatF_236-245	0.6929	0.0042	0
Ubiquitin_64-72	CatF_236-245	0.6893	0.0045	0
CTSZ_261-270	CatF_266-278	0.6536	0.0082	0
CTSZ_39-47	CatF_266-278	0.6464	0.0092	0
DPP7_113-123	CatF_266-278	0.4536	0.0895	0
DPP7_40-47	CatF_266-278	0.6286	0.0121	0
DPP7_449-462	CatF_266-278	0.5393	0.038	0
HEXB_285-300	CatF_266-278	0.75	0.0013	0
HEXB_391-400	CatF_266-278	0.7643	0.0009	0
LAMP1_138-146	CatF_266-278	0.7286	0.0021	0
LAMP1_327-337	CatF_266-278	0.6857	0.0048	0
LAMP1_357-363	CatF_266-278	0.65	0.0087	0
LAMP2_145-152	CatF_266-278	0.7607	0.001	0
LAMP2_153-161	CatF_266-278	0.7571	0.0011	0
LAMP2_281-289	CatF_266-278	0.725	0.0022	0
LYZ_52-59	CatF_266-278	0.4107	0.1283	0
LYZ_69-80	CatF_266-278	0.4786	0.0711	0
FUCA1_114-130	CatF_266-278	0.6714	0.0061	0
FUCA1_163-173	CatF_266-278	0.7	0.0037	0
FUCA1_344-354	CatF_266-278	0.6536	0.0082	0
TCN2_300-313	CatF_266-278	0.5786	0.0238	0
TCN2_393-399	CatF_266-278	0.7357	0.0018	0
TCN2_45-59	CatF_266-278	0.625	0.0127	0
TPP1_246-259	CatF_266-278	0.5036	0.0557	0
TPP1_507-520	CatF_266-278	0.4714	0.0761	0
TPP1_61-78	CatF_266-278	0.6	0.0181	0
Ubiquitin_12-27	CatF_266-278	0.7929	0.0004	0
Ubiquitin_64-72	CatF_266-278	0.7821	0.0006	0
CTSZ_261-270	CatF_442-450	0.775	0.0007	0
CTSZ_39-47	CatF_442-450	0.775	0.0007	0
DPP7_113-123	CatF_442-450	0.5286	0.0428	0
DPP7_40-47	CatF_442-450	0.65	0.0087	0
DPP7_449-462	CatF_442-450	0.6036	0.0172	0
HEXB_285-300	CatF_442-450	0.7321	0.0019	0
HEXB_391-400	CatF_442-450	0.7571	0.0011	0
LAMP1_327-337	CatF_442-450	0.7464	0.0014	0
LAMP1_357-363	CatF_442-450	0.7107	0.003	0
LAMP2_153-161	CatF_442-450	0.7679	0.0008	0
LAMP2_281-289	CatF_442-450	0.7786	0.0006	0
LYZ_52-59	CatF_442-450	0.5893	0.0208	0
LYZ_69-80	CatF_442-450	0.6143	0.0148	0
FUCA1_114-130	CatF_442-450	0.7	0.0037	0
FUCA1_163-173	CatF_442-450	0.7214	0.0024	0
FUCA1_344-354	CatF_442-450	0.6857	0.0048	0
TCN2_300-313	CatF_442-450	0.5679	0.0272	0
TCN2_393-399	CatF_442-450	0.7143	0.0028	0
TCN2_45-59	CatF_442-450	0.6036	0.0172	0
TPP1_246-259	CatF_442-450	0.425	0.1143	0
TPP1_507-520	CatF_442-450	0.4571	0.0867	0
TPP1_61-78	CatF_442-450	0.5607	0.0297	0
Ubiquitin_12-27	CatF_442-450	0.7893	0.0005	0
Ubiquitin_64-72	CatF_442-450	0.7786	0.0006	0
DPP7_113-123	CTSL_105-116	0.625	0.0127	0
DPP7_40-47	CTSL_105-116	0.675	0.0058	0
DPP7_449-462	CTSL_105-116	0.6036	0.0172	0
GM2A_170-179	CTSL_105-116	0.7893	0.0005	0
LAMP1_327-337	CTSL_105-116	0.7929	0.0004	0
LYZ_52-59	CTSL_105-116	0.5036	0.0557	0
LYZ_69-80	CTSL_105-116	0.5429	0.0365	0
FUCA1_114-130	CTSL_105-116	0.7571	0.0011	0
FUCA1_163-173	CTSL_105-116	0.7964	0.0004	0
FUCA1_344-354	CTSL_105-116	0.7857	0.0005	0
TCN2_300-313	CTSL_105-116	0.6536	0.0082	0
TCN2_393-399	CTSL_105-116	0.775	0.0007	0
TCN2_45-59	CTSL_105-116	0.5857	0.0218	0
TPP1_246-259	CTSL_105-116	0.5214	0.0462	0
TPP1_507-520	CTSL_105-116	0.6679	0.0065	0
TPP1_61-78	CTSL_105-116	0.7	0.0037	0
Ubiquitin_12-27	CTSL_105-116	0.7964	0.0004	0
Ubiquitin_64-72	CTSL_105-116	0.7929	0.0004	0
DPP7_113-123	CTSZ_261-270	0.7536	0.0012	0
DPP7_40-47	CTSZ_261-270	0.6607	0.0073	0
DPP7_449-462	CTSZ_261-270	0.7786	0.0006	0
GM2A_170-179	CTSZ_261-270	0.7357	0.0018	0
GM2A_89-96	CTSZ_261-270	0.7536	0.0012	0
HEXB_285-300	CTSZ_261-270	0.7679	0.0008	0
HEXB_391-400	CTSZ_261-270	0.8	0.0003	0
LAMP2_133-144	CTSZ_261-270	0.7536	0.0012	0
LAMP2_145-152	CTSZ_261-270	0.7857	0.0005	0
LAMP2_281-289	CTSZ_261-270	0.7964	0.0004	0
LYZ_52-59	CTSZ_261-270	0.7071	0.0032	0
LYZ_69-80	CTSZ_261-270	0.6429	0.0097	0
TCN2_300-313	CTSZ_261-270	0.4714	0.0761	0
TCN2_393-399	CTSZ_261-270	0.55	0.0337	0
TCN2_45-59	CTSZ_261-270	0.3536	0.1961	0
TPP1_246-259	CTSZ_261-270	0.5643	0.0284	0
TPP1_507-520	CTSZ_261-270	0.6786	0.0054	0
TPP1_61-78	CTSZ_261-270	0.7321	0.0019	0
Ubiquitin_12-27	CTSZ_261-270	0.55	0.0337	0
Ubiquitin_64-72	CTSZ_261-270	0.5679	0.0272	0
DPP7_113-123	CTSZ_39-47	0.5393	0.038	0
DPP7_40-47	CTSZ_39-47	0.4571	0.0867	0
DPP7_449-462	CTSZ_39-47	0.6393	0.0103	0
GM2A_170-179	CTSZ_39-47	0.725	0.0022	0
HEXB_285-300	CTSZ_39-47	0.7821	0.0006	0
LAMP1_327-337	CTSZ_39-47	0.7536	0.0012	0
LAMP1_357-363	CTSZ_39-47	0.75	0.0013	0
LAMP2_133-144	CTSZ_39-47	0.7857	0.0005	0
LAMP2_145-152	CTSZ_39-47	0.75	0.0013	0
LYZ_52-59	CTSZ_39-47	0.65	0.0087	0
LYZ_69-80	CTSZ_39-47	0.6321	0.0115	0
FUCA1_114-130	CTSZ_39-47	0.725	0.0022	0
FUCA1_163-173	CTSZ_39-47	0.7607	0.001	0
FUCA1_344-354	CTSZ_39-47	0.7107	0.003	0
TCN2_300-313	CTSZ_39-47	0.6393	0.0103	0
TCN2_393-399	CTSZ_39-47	0.7071	0.0032	0
TCN2_45-59	CTSZ_39-47	0.5964	0.0189	0
TPP1_246-259	CTSZ_39-47	0.4893	0.0642	0
TPP1_507-520	CTSZ_39-47	0.5357	0.0396	0
TPP1_61-78	CTSZ_39-47	0.6536	0.0082	0
Ubiquitin_12-27	CTSZ_39-47	0.7	0.0037	0
Ubiquitin_64-72	CTSZ_39-47	0.7179	0.0026	0
GM2A_170-179	DPP7_113-123	0.5643	0.0284	0
GM2A_89-96	DPP7_113-123	0.4607	0.0839	0
HEXB_285-300	DPP7_113-123	0.5107	0.0517	0
HEXB_391-400	DPP7_113-123	0.5286	0.0428	0
LAMP1_138-146	DPP7_113-123	0.7929	0.0004	0
LAMP1_327-337	DPP7_113-123	0.7	0.0037	0
LAMP1_357-363	DPP7_113-123	0.775	0.0007	0
LAMP2_133-144	DPP7_113-123	0.5214	0.0462	0
LAMP2_145-152	DPP7_113-123	0.7107	0.003	0
LAMP2_153-161	DPP7_113-123	0.5214	0.0462	0
LAMP2_281-289	DPP7_113-123	0.5643	0.0284	0
LYZ_52-59	DPP7_113-123	0.675	0.0058	0
LYZ_69-80	DPP7_113-123	0.6036	0.0172	0
FUCA1_114-130	DPP7_113-123	0.7786	0.0006	0
FUCA1_163-173	DPP7_113-123	0.7464	0.0014	0
FUCA1_344-354	DPP7_113-123	0.7357	0.0018	0
TCN2_300-313	DPP7_113-123	0.2893	0.2957	0
TCN2_393-399	DPP7_113-123	0.2679	0.3344	0
TCN2_45-59	DPP7_113-123	-0.0786	0.7808	0
TPP1_246-259	DPP7_113-123	0.5286	0.0428	0
TPP1_507-520	DPP7_113-123	0.7893	0.0005	0
TPP1_61-78	DPP7_113-123	0.55	0.0337	0
Ubiquitin_12-27	DPP7_113-123	0.2393	0.3904	0
Ubiquitin_64-72	DPP7_113-123	0.225	0.4201	0
DPP7_449-462	DPP7_40-47	0.7286	0.0021	0
GM2A_170-179	DPP7_40-47	0.5821	0.0228	0
GM2A_89-96	DPP7_40-47	0.5179	0.048	0
HEXB_285-300	DPP7_40-47	0.5357	0.0396	0
HEXB_391-400	DPP7_40-47	0.5607	0.0297	0
LAMP1_138-146	DPP7_40-47	0.725	0.0022	0
LAMP1_327-337	DPP7_40-47	0.6143	0.0148	0
LAMP1_357-363	DPP7_40-47	0.625	0.0127	0
LAMP2_133-144	DPP7_40-47	0.4929	0.062	0
LAMP2_145-152	DPP7_40-47	0.6071	0.0164	0
LAMP2_153-161	DPP7_40-47	0.45	0.0924	0
LAMP2_281-289	DPP7_40-47	0.4607	0.0839	0
LYZ_52-59	DPP7_40-47	0.4821	0.0687	0
LYZ_69-80	DPP7_40-47	0.5071	0.0537	0
FUCA1_114-130	DPP7_40-47	0.6357	0.0109	0
FUCA1_163-173	DPP7_40-47	0.6071	0.0164	0
FUCA1_344-354	DPP7_40-47	0.5964	0.0189	0
TCN2_300-313	DPP7_40-47	0.1857	0.5075	0
TCN2_393-399	DPP7_40-47	0.2571	0.3549	0
TCN2_45-59	DPP7_40-47	-0.0143	0.9597	0
TPP1_246-259	DPP7_40-47	0.5679	0.0272	0
TPP1_507-520	DPP7_40-47	0.7679	0.0008	0
TPP1_61-78	DPP7_40-47	0.5679	0.0272	0
Ubiquitin_12-27	DPP7_40-47	0.3643	0.1819	0
Ubiquitin_64-72	DPP7_40-47	0.3393	0.216	0
GM2A_170-179	DPP7_449-462	0.5643	0.0284	0
GM2A_89-96	DPP7_449-462	0.5393	0.038	0
HEXB_285-300	DPP7_449-462	0.5714	0.0261	0
HEXB_391-400	DPP7_449-462	0.5929	0.0198	0
LAMP1_138-146	DPP7_449-462	0.7714	0.0008	0
LAMP1_327-337	DPP7_449-462	0.6929	0.0042	0
LAMP1_357-363	DPP7_449-462	0.6571	0.0078	0
LAMP2_133-144	DPP7_449-462	0.6321	0.0115	0
LAMP2_145-152	DPP7_449-462	0.675	0.0058	0
LAMP2_153-161	DPP7_449-462	0.65	0.0087	0
LAMP2_281-289	DPP7_449-462	0.6429	0.0097	0
LYZ_52-59	DPP7_449-462	0.6857	0.0048	0
LYZ_69-80	DPP7_449-462	0.5679	0.0272	0
FUCA1_163-173	DPP7_449-462	0.7857	0.0005	0
FUCA1_344-354	DPP7_449-462	0.6571	0.0078	0
TCN2_300-313	DPP7_449-462	0.35	0.2009	0
TCN2_393-399	DPP7_449-462	0.3643	0.1819	0
TCN2_45-59	DPP7_449-462	0.1107	0.6945	0
TPP1_246-259	DPP7_449-462	0.6036	0.0172	0
TPP1_507-520	DPP7_449-462	0.65	0.0087	0
TPP1_61-78	DPP7_449-462	0.5357	0.0396	0
Ubiquitin_12-27	DPP7_449-462	0.2714	0.3278	0
Ubiquitin_64-72	DPP7_449-462	0.2821	0.3083	0
HEXB_285-300	GM2A_170-179	0.6143	0.0148	0
HEXB_391-400	GM2A_170-179	0.6179	0.0141	0
LAMP1_327-337	GM2A_170-179	0.7464	0.0014	0
LAMP1_357-363	GM2A_170-179	0.7679	0.0008	0
LAMP2_153-161	GM2A_170-179	0.7179	0.0026	0
LAMP2_281-289	GM2A_170-179	0.7857	0.0005	0
LYZ_52-59	GM2A_170-179	0.625	0.0127	0
LYZ_69-80	GM2A_170-179	0.5964	0.0189	0
FUCA1_114-130	GM2A_170-179	0.6571	0.0078	0
FUCA1_163-173	GM2A_170-179	0.6821	0.0051	0
FUCA1_344-354	GM2A_170-179	0.6571	0.0078	0
TCN2_300-313	GM2A_170-179	0.4857	0.0664	0
TCN2_393-399	GM2A_170-179	0.6071	0.0164	0
TCN2_45-59	GM2A_170-179	0.4464	0.0953	0
TPP1_246-259	GM2A_170-179	0.3286	0.2318	0
TPP1_507-520	GM2A_170-179	0.375	0.1684	0
TPP1_61-78	GM2A_170-179	0.4536	0.0895	0
Ubiquitin_12-27	GM2A_170-179	0.7893	0.0005	0
Ubiquitin_64-72	GM2A_170-179	0.775	0.0007	0
HEXB_285-300	GM2A_89-96	0.7536	0.0012	0
HEXB_391-400	GM2A_89-96	0.7679	0.0008	0
LAMP1_327-337	GM2A_89-96	0.7321	0.0019	0
LAMP1_357-363	GM2A_89-96	0.7357	0.0018	0
LAMP2_153-161	GM2A_89-96	0.7893	0.0005	0
LYZ_52-59	GM2A_89-96	0.5643	0.0284	0
LYZ_69-80	GM2A_89-96	0.6143	0.0148	0
FUCA1_114-130	GM2A_89-96	0.6643	0.0069	0
FUCA1_163-173	GM2A_89-96	0.6857	0.0048	0
FUCA1_344-354	GM2A_89-96	0.65	0.0087	0
TCN2_300-313	GM2A_89-96	0.6679	0.0065	0
TCN2_393-399	GM2A_89-96	0.8	0.0003	0
TCN2_45-59	GM2A_89-96	0.6821	0.0051	0
TPP1_246-259	GM2A_89-96	0.3929	0.1475	0
TPP1_507-520	GM2A_89-96	0.4036	0.1358	0
TPP1_61-78	GM2A_89-96	0.5357	0.0396	0
LAMP1_138-146	HEXB_285-300	0.775	0.0007	0
LAMP1_327-337	HEXB_285-300	0.6036	0.0172	0
LAMP1_357-363	HEXB_285-300	0.6571	0.0078	0
LAMP2_145-152	HEXB_285-300	0.6929	0.0042	0
LAMP2_153-161	HEXB_285-300	0.7143	0.0028	0
LYZ_52-59	HEXB_285-300	0.3714	0.1728	0
LYZ_69-80	HEXB_285-300	0.5964	0.0189	0
FUCA1_114-130	HEXB_285-300	0.6679	0.0065	0
FUCA1_163-173	HEXB_285-300	0.6929	0.0042	0
FUCA1_344-354	HEXB_285-300	0.6107	0.0156	0
TCN2_300-313	HEXB_285-300	0.7214	0.0024	0
TCN2_45-59	HEXB_285-300	0.65	0.0087	0
TPP1_246-259	HEXB_285-300	0.7821	0.0006	0
TPP1_507-520	HEXB_285-300	0.7321	0.0019	0
Ubiquitin_12-27	HEXB_285-300	0.7679	0.0008	0
Ubiquitin_64-72	HEXB_285-300	0.7857	0.0005	0
LAMP1_138-146	HEXB_391-400	0.75	0.0013	0
LAMP1_327-337	HEXB_391-400	0.6	0.0181	0
LAMP1_357-363	HEXB_391-400	0.6357	0.0109	0
LAMP2_145-152	HEXB_391-400	0.675	0.0058	0
LAMP2_153-161	HEXB_391-400	0.775	0.0007	0
LYZ_52-59	HEXB_391-400	0.3786	0.1641	0
LYZ_69-80	HEXB_391-400	0.4893	0.0642	0
FUCA1_114-130	HEXB_391-400	0.7	0.0037	0
FUCA1_163-173	HEXB_391-400	0.7643	0.0009	0
FUCA1_344-354	HEXB_391-400	0.675	0.0058	0
TCN2_300-313	HEXB_391-400	0.6821	0.0051	0
TCN2_393-399	HEXB_391-400	0.7929	0.0004	0
TCN2_45-59	HEXB_391-400	0.65	0.0087	0
TPP1_246-259	HEXB_391-400	0.6429	0.0097	0
TPP1_507-520	HEXB_391-400	0.7286	0.0021	0
TPP1_61-78	HEXB_391-400	0.7786	0.0006	0
Ubiquitin_12-27	HEXB_391-400	0.7143	0.0028	0
Ubiquitin_64-72	HEXB_391-400	0.7286	0.0021	0
LYZ_52-59	LAMP1_138-146	0.6536	0.0082	0
LYZ_69-80	LAMP1_138-146	0.6643	0.0069	0
TCN2_300-313	LAMP1_138-146	0.5321	0.0412	0
TCN2_393-399	LAMP1_138-146	0.6179	0.0141	0
TCN2_45-59	LAMP1_138-146	0.3143	0.2539	0
TPP1_246-259	LAMP1_138-146	0.6429	0.0097	0
TPP1_507-520	LAMP1_138-146	0.6607	0.0073	0
TPP1_61-78	LAMP1_138-146	0.7357	0.0018	0
Ubiquitin_12-27	LAMP1_138-146	0.65	0.0087	0
Ubiquitin_64-72	LAMP1_138-146	0.6536	0.0082	0
LAMP2_133-144	LAMP1_327-337	0.6536	0.0082	0
LAMP2_281-289	LAMP1_327-337	0.6357	0.0109	0
LYZ_52-59	LAMP1_327-337	0.5714	0.0261	0
LYZ_69-80	LAMP1_327-337	0.5	0.0577	0
FUCA1_114-130	LAMP1_327-337	0.7321	0.0019	0
FUCA1_163-173	LAMP1_327-337	0.7536	0.0012	0
FUCA1_344-354	LAMP1_327-337	0.7679	0.0008	0
TCN2_300-313	LAMP1_327-337	0.4357	0.1045	0
TCN2_393-399	LAMP1_327-337	0.5786	0.0238	0
TCN2_45-59	LAMP1_327-337	0.2464	0.376	0
TPP1_246-259	LAMP1_327-337	0.55	0.0337	0
TPP1_507-520	LAMP1_327-337	0.5786	0.0238	0
TPP1_61-78	LAMP1_327-337	0.6107	0.0156	0
Ubiquitin_12-27	LAMP1_327-337	0.5464	0.0351	0
Ubiquitin_64-72	LAMP1_327-337	0.55	0.0337	0
LAMP2_133-144	LAMP1_357-363	0.7357	0.0018	0
LAMP2_281-289	LAMP1_357-363	0.7464	0.0014	0
LYZ_52-59	LAMP1_357-363	0.6357	0.0109	0
LYZ_69-80	LAMP1_357-363	0.6179	0.0141	0
TCN2_300-313	LAMP1_357-363	0.575	0.0249	0
TCN2_393-399	LAMP1_357-363	0.625	0.0127	0
TCN2_45-59	LAMP1_357-363	0.275	0.3212	0
TPP1_246-259	LAMP1_357-363	0.5321	0.0412	0
TPP1_507-520	LAMP1_357-363	0.6143	0.0148	0
TPP1_61-78	LAMP1_357-363	0.6357	0.0109	0
Ubiquitin_12-27	LAMP1_357-363	0.5929	0.0198	0
Ubiquitin_64-72	LAMP1_357-363	0.5857	0.0218	0
LAMP2_153-161	LAMP2_133-144	0.8	0.0003	0
LYZ_52-59	LAMP2_133-144	0.5	0.0577	0
LYZ_69-80	LAMP2_133-144	0.6179	0.0141	0
FUCA1_114-130	LAMP2_133-144	0.7607	0.001	0
FUCA1_163-173	LAMP2_133-144	0.7679	0.0008	0
FUCA1_344-354	LAMP2_133-144	0.6857	0.0048	0
TCN2_300-313	LAMP2_133-144	0.775	0.0007	0
TCN2_45-59	LAMP2_133-144	0.6714	0.0061	0
TPP1_246-259	LAMP2_133-144	0.575	0.0249	0
TPP1_507-520	LAMP2_133-144	0.5214	0.0462	0
TPP1_61-78	LAMP2_133-144	0.6786	0.0054	0
LYZ_52-59	LAMP2_145-152	0.675	0.0058	0
LYZ_69-80	LAMP2_145-152	0.6714	0.0061	0
TCN2_300-313	LAMP2_145-152	0.6643	0.0069	0
TCN2_393-399	LAMP2_145-152	0.6893	0.0045	0
TCN2_45-59	LAMP2_145-152	0.4036	0.1358	0
TPP1_246-259	LAMP2_145-152	0.5071	0.0537	0
TPP1_507-520	LAMP2_145-152	0.4929	0.062	0
TPP1_61-78	LAMP2_145-152	0.5679	0.0272	0
Ubiquitin_12-27	LAMP2_145-152	0.6857	0.0048	0
Ubiquitin_64-72	LAMP2_145-152	0.6714	0.0061	0
LAMP2_281-289	LAMP2_153-161	0.7571	0.0011	0
LYZ_52-59	LAMP2_153-161	0.4893	0.0642	0
LYZ_69-80	LAMP2_153-161	0.4	0.1396	0
TCN2_300-313	LAMP2_153-161	0.5893	0.0208	0
TCN2_393-399	LAMP2_153-161	0.7143	0.0028	0
TCN2_45-59	LAMP2_153-161	0.4893	0.0642	0
TPP1_246-259	LAMP2_153-161	0.5179	0.048	0
TPP1_507-520	LAMP2_153-161	0.4536	0.0895	0
TPP1_61-78	LAMP2_153-161	0.575	0.0249	0
Ubiquitin_12-27	LAMP2_153-161	0.6214	0.0134	0
Ubiquitin_64-72	LAMP2_153-161	0.6357	0.0109	0
LYZ_52-59	LAMP2_281-289	0.6107	0.0156	0
LYZ_69-80	LAMP2_281-289	0.7214	0.0024	0
FUCA1_114-130	LAMP2_281-289	0.7821	0.0006	0
FUCA1_163-173	LAMP2_281-289	0.7786	0.0006	0
FUCA1_344-354	LAMP2_281-289	0.7036	0.0034	0
TCN2_45-59	LAMP2_281-289	0.6786	0.0054	0
TPP1_246-259	LAMP2_281-289	0.5607	0.0297	0
TPP1_507-520	LAMP2_281-289	0.5571	0.031	0
TPP1_61-78	LAMP2_281-289	0.6893	0.0045	0
Ubiquitin_12-27	LAMP2_281-289	0.8	0.0003	0
FUCA1_114-130	LYZ_52-59	0.775	0.0007	0
FUCA1_163-173	LYZ_52-59	0.6964	0.0039	0
FUCA1_344-354	LYZ_52-59	0.7071	0.0032	0
TCN2_300-313	LYZ_52-59	0.4571	0.0867	0
TCN2_393-399	LYZ_52-59	0.2857	0.3019	0
TCN2_45-59	LYZ_52-59	0.2393	0.3904	0
TPP1_246-259	LYZ_52-59	0.2357	0.3977	0
TPP1_507-520	LYZ_52-59	0.2821	0.3083	0
TPP1_61-78	LYZ_52-59	0.2893	0.2957	0
Ubiquitin_12-27	LYZ_52-59	0.2643	0.3412	0
Ubiquitin_64-72	LYZ_52-59	0.2464	0.376	0
FUCA1_114-130	LYZ_69-80	0.6929	0.0042	0
FUCA1_163-173	LYZ_69-80	0.5643	0.0284	0
FUCA1_344-354	LYZ_69-80	0.5929	0.0198	0
TCN2_300-313	LYZ_69-80	0.65	0.0087	0
TCN2_393-399	LYZ_69-80	0.475	0.0736	0
TCN2_45-59	LYZ_69-80	0.4214	0.1177	0
TPP1_246-259	LYZ_69-80	0.4714	0.0761	0
TPP1_507-520	LYZ_69-80	0.4	0.1396	0
TPP1_61-78	LYZ_69-80	0.525	0.0445	0
Ubiquitin_12-27	LYZ_69-80	0.4857	0.0664	0
Ubiquitin_64-72	LYZ_69-80	0.4643	0.0813	0
AP2B1_712-719	P-tau (ng/L)	0.4229	0.1162	0
AP2B1_835-842	P-tau (ng/L)	0.448	0.094	0
AP2B1_868-878	P-tau (ng/L)	0.4516	0.0911	0
APP_289-301	P-tau (ng/L)	0.3047	0.2696	0
APP_439-450	P-tau (ng/L)	0.1971	0.4813	0
BSA_421-433	P-tau (ng/L)	-0.2151	0.4415	0
C9_146-154	P-tau (ng/L)	-0.2401	0.3886	0
C9_186-194	P-tau (ng/L)	-0.2151	0.4415	0
C9_232-242	P-tau (ng/L)	-0.2617	0.3462	0
C9_473-483	P-tau (ng/L)	-0.2796	0.3129	0
C9_497-508	P-tau (ng/L)	-0.2258	0.4184	0
CTSB_210-220	P-tau (ng/L)	-0.0968	0.7315	0
CTSB_58-71	P-tau (ng/L)	0.1039	0.7124	0
CTSB_80-87	P-tau (ng/L)	0.3262	0.2354	0
CTSD_112-122	P-tau (ng/L)	-0.0932	0.7411	0
CTSD_349-357	P-tau (ng/L)	-0.1685	0.5484	0
CTSD_55-72	P-tau (ng/L)	-0.1111	0.6934	0
CatF_103-116	P-tau (ng/L)	0.2867	0.3001	0
CatF_236-245	P-tau (ng/L)	0.2115	0.4493	0
CatF_266-278	P-tau (ng/L)	0.3871	0.154	0
CatF_442-450	P-tau (ng/L)	0.3692	0.1757	0
CTSL_105-116	P-tau (ng/L)	0.2043	0.4652	0
CTSZ_261-270	P-tau (ng/L)	0.1111	0.6934	0
CTSZ_39-47	P-tau (ng/L)	0.1864	0.506	0
DPP7_113-123	P-tau (ng/L)	0.0036	0.9899	0
DPP7_40-47	P-tau (ng/L)	0.0108	0.9697	0
DPP7_449-462	P-tau (ng/L)	0.172	0.5398	0
GM2A_170-179	P-tau (ng/L)	0.5699	0.0266	0
GM2A_89-96	P-tau (ng/L)	0.4552	0.0882	0
HEXB_285-300	P-tau (ng/L)	0.0143	0.9596	0
HEXB_391-400	P-tau (ng/L)	0	1	0
LAMP1_138-146	P-tau (ng/L)	0.2724	0.326	0
LAMP1_327-337	P-tau (ng/L)	0.2867	0.3001	0
LAMP1_357-363	P-tau (ng/L)	0.2724	0.326	0
LAMP2_133-144	P-tau (ng/L)	0.3835	0.1582	0
LAMP2_145-152	P-tau (ng/L)	0.4444	0.0969	0
LAMP2_153-161	P-tau (ng/L)	0.362	0.1849	0
LAMP2_281-289	P-tau (ng/L)	0.2903	0.2939	0
LYZ_52-59	P-tau (ng/L)	0.2151	0.4415	0
LYZ_69-80	P-tau (ng/L)	0.0896	0.7508	0
FUCA1_114-130	P-tau (ng/L)	0.2473	0.3742	0
FUCA1_163-173	P-tau (ng/L)	0.2294	0.4108	0
FUCA1_344-354	P-tau (ng/L)	0.1828	0.5143	0
TCN2_300-313	P-tau (ng/L)	0.1147	0.684	0
TCN2_393-399	P-tau (ng/L)	0.147	0.6012	0
TCN2_45-59	P-tau (ng/L)	0.1326	0.6375	0
TPP1_246-259	P-tau (ng/L)	-0.0287	0.9192	0
TPP1_507-520	P-tau (ng/L)	-0.3298	0.23	0
TPP1_61-78	P-tau (ng/L)	-0.1398	0.6193	0
Ubiquitin_12-27	P-tau (ng/L)	0.4229	0.1162	0
Ubiquitin_64-72	P-tau (ng/L)	0.4086	0.1305	0
TCN2_300-313	FUCA1_114-130	0.6393	0.0103	0
TCN2_393-399	FUCA1_114-130	0.5607	0.0297	0
TCN2_45-59	FUCA1_114-130	0.3571	0.1913	0
TPP1_246-259	FUCA1_114-130	0.5214	0.0462	0
TPP1_507-520	FUCA1_114-130	0.5393	0.038	0
TPP1_61-78	FUCA1_114-130	0.5607	0.0297	0
Ubiquitin_12-27	FUCA1_114-130	0.4357	0.1045	0
Ubiquitin_64-72	FUCA1_114-130	0.4286	0.111	0
TCN2_300-313	FUCA1_163-173	0.575	0.0249	0
TCN2_393-399	FUCA1_163-173	0.5714	0.0261	0
TCN2_45-59	FUCA1_163-173	0.3643	0.1819	0
TPP1_246-259	FUCA1_163-173	0.4893	0.0642	0
TPP1_507-520	FUCA1_163-173	0.5714	0.0261	0
TPP1_61-78	FUCA1_163-173	0.5821	0.0228	0
Ubiquitin_12-27	FUCA1_163-173	0.4464	0.0953	0
Ubiquitin_64-72	FUCA1_163-173	0.45	0.0924	0
TCN2_300-313	FUCA1_344-354	0.5857	0.0218	0
TCN2_393-399	FUCA1_344-354	0.5464	0.0351	0
TCN2_45-59	FUCA1_344-354	0.3286	0.2318	0
TPP1_246-259	FUCA1_344-354	0.4036	0.1358	0
TPP1_507-520	FUCA1_344-354	0.5179	0.048	0
TPP1_61-78	FUCA1_344-354	0.5286	0.0428	0
Ubiquitin_12-27	FUCA1_344-354	0.4286	0.111	0
Ubiquitin_64-72	FUCA1_344-354	0.4179	0.1212	0
TPP1_246-259	TCN2_300-313	0.375	0.1684	0
TPP1_507-520	TCN2_300-313	0.3536	0.1961	0
TPP1_61-78	TCN2_300-313	0.5036	0.0557	0
Ubiquitin_12-27	TCN2_300-313	0.6929	0.0042	0
Ubiquitin_64-72	TCN2_300-313	0.6857	0.0048	0
TPP1_246-259	TCN2_393-399	0.4321	0.1077	0
TPP1_507-520	TCN2_393-399	0.4571	0.0867	0
TPP1_61-78	TCN2_393-399	0.6071	0.0164	0
TPP1_246-259	TCN2_45-59	0.2036	0.4668	0
TPP1_507-520	TCN2_45-59	0.1357	0.6296	0
TPP1_61-78	TCN2_45-59	0.4	0.1396	0
Ubiquitin_12-27	TCN2_45-59	0.7464	0.0014	0
Ubiquitin_64-72	TCN2_45-59	0.7536	0.0012	0
TPP1_507-520	TPP1_246-259	0.7071	0.0032	0
Ubiquitin_12-27	TPP1_246-259	0.4464	0.0953	0
Ubiquitin_64-72	TPP1_246-259	0.4679	0.0786	0
Ubiquitin_12-27	TPP1_507-520	0.3679	0.1773	0
Ubiquitin_64-72	TPP1_507-520	0.3786	0.1641	0
Ubiquitin_12-27	TPP1_61-78	0.6	0.0181	0
Ubiquitin_64-72	TPP1_61-78	0.6286	0.0121	0
AP2B1_712-719	T-tau (ng/L)	0.3071	0.2655	0
AP2B1_835-842	T-tau (ng/L)	0.25	0.3688	0
AP2B1_868-878	T-tau (ng/L)	0.3857	0.1556	0
APP_289-301	T-tau (ng/L)	0.0357	0.8994	0
APP_439-450	T-tau (ng/L)	-0.1857	0.5075	0
BSA_421-433	T-tau (ng/L)	0.0393	0.8894	0
C9_146-154	T-tau (ng/L)	0.3857	0.1556	0
C9_186-194	T-tau (ng/L)	0.4107	0.1283	0
C9_232-242	T-tau (ng/L)	0.3321	0.2265	0
C9_473-483	T-tau (ng/L)	0.3679	0.1773	0
C9_497-508	T-tau (ng/L)	0.3286	0.2318	0
CTSB_210-220	T-tau (ng/L)	-0.0964	0.7325	0
CTSB_58-71	T-tau (ng/L)	-0.0571	0.8397	0
CTSB_80-87	T-tau (ng/L)	0.1929	0.491	0
CTSD_112-122	T-tau (ng/L)	0.2714	0.3278	0
CTSD_349-357	T-tau (ng/L)	0.2357	0.3977	0
CTSD_55-72	T-tau (ng/L)	0.2464	0.376	0
CatF_103-116	T-tau (ng/L)	0.2536	0.3618	0
CatF_236-245	T-tau (ng/L)	0.1679	0.5499	0
CatF_266-278	T-tau (ng/L)	0.1893	0.4993	0
CatF_442-450	T-tau (ng/L)	0.275	0.3212	0
CTSL_105-116	T-tau (ng/L)	0.1357	0.6296	0
CTSZ_261-270	T-tau (ng/L)	0.2357	0.3977	0
CTSZ_39-47	T-tau (ng/L)	0.2107	0.451	0
DPP7_113-123	T-tau (ng/L)	0.0607	0.8298	0
DPP7_40-47	T-tau (ng/L)	-0.1393	0.6205	0
DPP7_449-462	T-tau (ng/L)	0.0286	0.9195	0
GM2A_170-179	T-tau (ng/L)	0.4786	0.0711	0
GM2A_89-96	T-tau (ng/L)	0.3429	0.2109	0
HEXB_285-300	T-tau (ng/L)	0.0143	0.9597	0
HEXB_391-400	T-tau (ng/L)	0.0036	0.9899	0
LAMP1_138-146	T-tau (ng/L)	0.2071	0.4588	0
LAMP1_327-337	T-tau (ng/L)	0.1036	0.7134	0
LAMP1_357-363	T-tau (ng/L)	0.25	0.3688	0
LAMP2_133-144	T-tau (ng/L)	0.3143	0.2539	0
LAMP2_145-152	T-tau (ng/L)	0.3464	0.2059	0
LAMP2_153-161	T-tau (ng/L)	0.1607	0.5672	0
LAMP2_281-289	T-tau (ng/L)	0.3571	0.1913	0
LYZ_52-59	T-tau (ng/L)	0.4536	0.0895	0
LYZ_69-80	T-tau (ng/L)	0.3	0.2773	0
P-tau (ng/L)	T-tau (ng/L)	0.5233	0.0453	0
FUCA1_114-130	T-tau (ng/L)	0.2929	0.2895	0
FUCA1_163-173	T-tau (ng/L)	0.3143	0.2539	0
FUCA1_344-354	T-tau (ng/L)	0.3286	0.2318	0
TCN2_300-313	T-tau (ng/L)	0.2429	0.3831	0
TCN2_393-399	T-tau (ng/L)	0.15	0.5936	0
TCN2_45-59	T-tau (ng/L)	0.2357	0.3977	0
TPP1_246-259	T-tau (ng/L)	-0.3429	0.2109	0
TPP1_507-520	T-tau (ng/L)	-0.25	0.3688	0
TPP1_61-78	T-tau (ng/L)	-0.0964	0.7325	0
Ubiquitin_12-27	T-tau (ng/L)	0.2393	0.3904	0
Ubiquitin_64-72	T-tau (ng/L)	0.2321	0.4051	0

## Sheet: Clincial Study I prodromal AD
Table S4. Spearman's correlation in the prodromal AD group of Clinical Study I (N = 10).
Variable	by Variable	Spearman ρ	Prob>|ρ|	Correlation (True = 1, False = 0)
GM2A_89-96	Age	0.8598	0.0014	1
AP2B1_835-842	AP2B1_712-719	0.9879	<.0001	1
AP2B1_868-878	AP2B1_712-719	0.9515	<.0001	1
LAMP1_357-363	AP2B1_712-719	0.8303	0.0029	1
LAMP2_145-152	AP2B1_712-719	0.8788	0.0008	1
LAMP2_153-161	AP2B1_712-719	1	<.0001	1
Ubiquitin_12-27	AP2B1_712-719	0.8303	0.0029	1
Ubiquitin_64-72	AP2B1_712-719	0.8303	0.0029	1
AP2B1_868-878	AP2B1_835-842	0.9394	<.0001	1
GM2A_89-96	AP2B1_835-842	0.8182	0.0038	1
LAMP2_145-152	AP2B1_835-842	0.8303	0.0029	1
LAMP2_153-161	AP2B1_835-842	0.9879	<.0001	1
Ubiquitin_12-27	AP2B1_835-842	0.8424	0.0022	1
Ubiquitin_64-72	AP2B1_835-842	0.8545	0.0016	1
LAMP2_153-161	AP2B1_868-878	0.9515	<.0001	1
Ubiquitin_12-27	AP2B1_868-878	0.9273	0.0001	1
Ubiquitin_64-72	AP2B1_868-878	0.8788	0.0008	1
APP_439-450	APP_289-301	0.9152	0.0002	1
LAMP1_327-337	APP_289-301	0.8061	0.0049	1
CTSL_105-116	APP_439-450	0.8182	0.0038	1
LAMP1_138-146	APP_439-450	0.8061	0.0049	1
LAMP1_327-337	APP_439-450	0.8061	0.0049	1
Ubiquitin_64-72	APP_439-450	0.8303	0.0029	1
HEXB_285-300	BSA_421-433	0.8424	0.0022	1
C9_186-194	C9_146-154	0.9758	<.0001	1
C9_232-242	C9_146-154	0.9394	<.0001	1
C9_473-483	C9_146-154	0.8545	0.0016	1
C9_497-508	C9_146-154	0.8545	0.0016	1
LYZ_52-59	C9_146-154	0.8061	0.0049	1
C9_232-242	C9_186-194	0.9758	<.0001	1
C9_473-483	C9_186-194	0.9152	0.0002	1
C9_497-508	C9_186-194	0.9152	0.0002	1
C9_473-483	C9_232-242	0.9636	<.0001	1
C9_497-508	C9_232-242	0.9636	<.0001	1
C9_497-508	C9_473-483	1	<.0001	1
TCN2_300-313	CTSB_58-71	0.8667	0.0012	1
TCN2_45-59	CTSB_58-71	0.8424	0.0022	1
HEXB_285-300	CTSB_80-87	-0.8424	0.0022	1
FUCA1_114-130	CatF_103-116	0.9152	0.0002	1
FUCA1_163-173	CatF_103-116	0.8303	0.0029	1
FUCA1_344-354	CatF_103-116	0.8061	0.0049	1
CatF_442-450	CatF_236-245	0.9515	<.0001	1
CTSZ_261-270	CatF_236-245	0.8182	0.0038	1
GM2A_170-179	CatF_236-245	0.8545	0.0016	1
GM2A_89-96	CatF_236-245	0.8667	0.0012	1
CatF_442-450	CatF_266-278	0.8909	0.0005	1
GM2A_170-179	CatF_266-278	0.8667	0.0012	1
GM2A_170-179	CatF_442-450	0.903	0.0003	1
GM2A_89-96	CatF_442-450	0.8424	0.0022	1
DPP7_113-123	CTSL_105-116	0.8182	0.0038	1
LAMP1_138-146	CTSL_105-116	0.8667	0.0012	1
LAMP1_357-363	CTSL_105-116	0.8303	0.0029	1
LYZ_52-59	CTSZ_261-270	0.9515	<.0001	1
LYZ_69-80	CTSZ_261-270	0.9515	<.0001	1
CTSZ_261-270	CTSZ_39-47	0.8303	0.0029	1
LYZ_52-59	CTSZ_39-47	0.8545	0.0016	1
LYZ_69-80	CTSZ_39-47	0.8667	0.0012	1
DPP7_449-462	DPP7_40-47	0.8061	0.0049	1
GM2A_170-179	GM2A_89-96	0.8545	0.0016	1
HEXB_391-400	HEXB_285-300	0.8909	0.0005	1
LAMP1_327-337	LAMP1_138-146	0.8424	0.0022	1
LAMP1_357-363	LAMP1_138-146	0.9758	<.0001	1
LAMP2_145-152	LAMP1_138-146	0.8182	0.0038	1
LAMP2_145-152	LAMP1_357-363	0.8667	0.0012	1
LAMP2_153-161	LAMP1_357-363	0.8303	0.0029	1
LAMP2_281-289	LAMP2_133-144	0.9152	0.0002	1
LAMP2_153-161	LAMP2_145-152	0.8788	0.0008	1
Ubiquitin_12-27	LAMP2_153-161	0.8303	0.0029	1
Ubiquitin_64-72	LAMP2_153-161	0.8303	0.0029	1
LYZ_69-80	LYZ_52-59	0.9758	<.0001	1
AP2B1_712-719	P-tau (ng/L)	0.8389	0.0024	1
AP2B1_835-842	P-tau (ng/L)	0.8024	0.0052	1
LAMP2_153-161	P-tau (ng/L)	0.8389	0.0024	1
FUCA1_163-173	FUCA1_114-130	0.9394	<.0001	1
FUCA1_344-354	FUCA1_114-130	0.8909	0.0005	1
FUCA1_344-354	FUCA1_163-173	0.8303	0.0029	1
TCN2_300-313	TCN2_45-59	0.9636	<.0001	1
TPP1_507-520	TPP1_61-78	0.903	0.0003	1
Ubiquitin_64-72	Ubiquitin_12-27	0.9636	<.0001	1
AP2B1_712-719	Age	0.6951	0.0256	0
AP2B1_835-842	Age	0.7256	0.0175	0
AP2B1_868-878	Age	0.561	0.0916	0
APP_289-301	Age	0.4939	0.1468	0
APP_439-450	Age	0.4939	0.1468	0
Aβ1-42 (ng/L)	Age	0.2805	0.4325	0
BSA_421-433	Age	-0.2012	0.5772	0
C9_146-154	Age	0.3171	0.372	0
C9_186-194	Age	0.3659	0.2985	0
C9_232-242	Age	0.3537	0.3161	0
C9_473-483	Age	0.2378	0.5082	0
C9_497-508	Age	0.2378	0.5082	0
CTSB_210-220	Age	0.3963	0.2568	0
CTSB_58-71	Age	-0.0427	0.9068	0
CTSB_80-87	Age	0.5976	0.0681	0
CTSD_112-122	Age	-0.0976	0.7886	0
CTSD_349-357	Age	0.2195	0.5423	0
CTSD_55-72	Age	0.1768	0.625	0
CatF_103-116	Age	0.3171	0.372	0
CatF_236-245	Age	0.75	0.0125	0
CatF_266-278	Age	0.5488	0.1004	0
CatF_442-450	Age	0.7256	0.0175	0
CTSL_105-116	Age	0.4146	0.2335	0
CTSZ_261-270	Age	0.6768	0.0316	0
CTSZ_39-47	Age	0.4634	0.1774	0
DPP7_113-123	Age	0.5854	0.0754	0
DPP7_40-47	Age	0.3963	0.2568	0
DPP7_449-462	Age	0.4512	0.1905	0
GM2A_170-179	Age	0.7012	0.0239	0
HEXB_285-300	Age	-0.3598	0.3072	0
HEXB_391-400	Age	-0.2317	0.5195	0
LAMP1_138-146	Age	0.6951	0.0256	0
LAMP1_327-337	Age	0.3598	0.3072	0
LAMP1_357-363	Age	0.7317	0.0162	0
LAMP2_133-144	Age	0.2988	0.4017	0
LAMP2_145-152	Age	0.6768	0.0316	0
LAMP2_153-161	Age	0.6951	0.0256	0
LAMP2_281-289	Age	0.3598	0.3072	0
LYZ_52-59	Age	0.6098	0.0612	0
LYZ_69-80	Age	0.5976	0.0681	0
P-tau (ng/L)	Age	0.3761	0.284	0
FUCA1_114-130	Age	0.0488	0.8935	0
FUCA1_163-173	Age	0.1402	0.6992	0
FUCA1_344-354	Age	0.0915	0.8016	0
TCN2_300-313	Age	-0.0915	0.8016	0
TCN2_393-399	Age	-0.1341	0.7118	0
TCN2_45-59	Age	0.0183	0.96	0
TPP1_246-259	Age	-0.3415	0.3342	0
TPP1_507-520	Age	-0.2378	0.5082	0
TPP1_61-78	Age	-0.4146	0.2335	0
T-tau (ng/L)	Age	0.3293	0.3529	0
Ubiquitin_12-27	Age	0.5427	0.105	0
Ubiquitin_64-72	Age	0.6951	0.0256	0
APP_289-301	AP2B1_712-719	0.7212	0.0186	0
APP_439-450	AP2B1_712-719	0.697	0.0251	0
BSA_421-433	AP2B1_712-719	-0.1394	0.7009	0
C9_146-154	AP2B1_712-719	0.0424	0.9074	0
C9_186-194	AP2B1_712-719	-0.0182	0.9602	0
C9_232-242	AP2B1_712-719	-0.0424	0.9074	0
C9_473-483	AP2B1_712-719	-0.1515	0.6761	0
C9_497-508	AP2B1_712-719	-0.1515	0.6761	0
CTSB_210-220	AP2B1_712-719	0.2727	0.4458	0
CTSB_58-71	AP2B1_712-719	-0.2485	0.4888	0
CTSB_80-87	AP2B1_712-719	0.4667	0.1739	0
CTSD_112-122	AP2B1_712-719	-0.503	0.1383	0
CTSD_349-357	AP2B1_712-719	-0.0667	0.8548	0
CTSD_55-72	AP2B1_712-719	-0.0061	0.9867	0
CatF_103-116	AP2B1_712-719	0.0788	0.8287	0
CatF_236-245	AP2B1_712-719	0.5515	0.0984	0
CatF_266-278	AP2B1_712-719	0.6	0.0667	0
CatF_442-450	AP2B1_712-719	0.5758	0.0816	0
CTSL_105-116	AP2B1_712-719	0.6242	0.0537	0
CTSZ_261-270	AP2B1_712-719	0.4545	0.1869	0
CTSZ_39-47	AP2B1_712-719	0.297	0.4047	0
DPP7_113-123	AP2B1_712-719	0.4909	0.1497	0
DPP7_40-47	AP2B1_712-719	0.3333	0.3466	0
DPP7_449-462	AP2B1_712-719	0.1152	0.7514	0
GM2A_170-179	AP2B1_712-719	0.6848	0.0289	0
GM2A_89-96	AP2B1_712-719	0.7939	0.0061	0
HEXB_285-300	AP2B1_712-719	-0.1515	0.6761	0
HEXB_391-400	AP2B1_712-719	-0.0909	0.8028	0
LAMP1_138-146	AP2B1_712-719	0.7697	0.0092	0
LAMP1_327-337	AP2B1_712-719	0.5636	0.0897	0
LAMP2_133-144	AP2B1_712-719	0.5152	0.1276	0
LAMP2_281-289	AP2B1_712-719	0.4788	0.1615	0
LYZ_52-59	AP2B1_712-719	0.4061	0.2443	0
LYZ_69-80	AP2B1_712-719	0.3818	0.2763	0
FUCA1_114-130	AP2B1_712-719	-0.1152	0.7514	0
FUCA1_163-173	AP2B1_712-719	0.1152	0.7514	0
FUCA1_344-354	AP2B1_712-719	-0.0909	0.8028	0
TCN2_300-313	AP2B1_712-719	-0.2121	0.5563	0
TCN2_393-399	AP2B1_712-719	-0.3333	0.3466	0
TCN2_45-59	AP2B1_712-719	-0.2242	0.5334	0
TPP1_246-259	AP2B1_712-719	-0.3939	0.26	0
TPP1_507-520	AP2B1_712-719	-0.2727	0.4458	0
TPP1_61-78	AP2B1_712-719	-0.297	0.4047	0
APP_289-301	AP2B1_835-842	0.7333	0.0158	0
APP_439-450	AP2B1_835-842	0.6848	0.0289	0
BSA_421-433	AP2B1_835-842	-0.2121	0.5563	0
C9_146-154	AP2B1_835-842	-0.0424	0.9074	0
C9_186-194	AP2B1_835-842	-0.0909	0.8028	0
C9_232-242	AP2B1_835-842	-0.1152	0.7514	0
C9_473-483	AP2B1_835-842	-0.2242	0.5334	0
C9_497-508	AP2B1_835-842	-0.2242	0.5334	0
CTSB_210-220	AP2B1_835-842	0.3091	0.3848	0
CTSB_58-71	AP2B1_835-842	-0.2242	0.5334	0
CTSB_80-87	AP2B1_835-842	0.5152	0.1276	0
CTSD_112-122	AP2B1_835-842	-0.4788	0.1615	0
CTSD_349-357	AP2B1_835-842	-0.0788	0.8287	0
CTSD_55-72	AP2B1_835-842	0.0061	0.9867	0
CatF_103-116	AP2B1_835-842	0.1394	0.7009	0
CatF_236-245	AP2B1_835-842	0.5879	0.0739	0
CatF_266-278	AP2B1_835-842	0.6242	0.0537	0
CatF_442-450	AP2B1_835-842	0.6121	0.06	0
CTSL_105-116	AP2B1_835-842	0.5394	0.1076	0
CTSZ_261-270	AP2B1_835-842	0.4182	0.2291	0
CTSZ_39-47	AP2B1_835-842	0.2485	0.4888	0
DPP7_113-123	AP2B1_835-842	0.4424	0.2004	0
DPP7_40-47	AP2B1_835-842	0.3212	0.3655	0
DPP7_449-462	AP2B1_835-842	0.1515	0.6761	0
GM2A_170-179	AP2B1_835-842	0.7576	0.0111	0
HEXB_285-300	AP2B1_835-842	-0.2242	0.5334	0
HEXB_391-400	AP2B1_835-842	-0.1273	0.7261	0
LAMP1_138-146	AP2B1_835-842	0.7212	0.0186	0
LAMP1_327-337	AP2B1_835-842	0.5394	0.1076	0
LAMP1_357-363	AP2B1_835-842	0.7818	0.0075	0
LAMP2_133-144	AP2B1_835-842	0.4909	0.1497	0
LAMP2_281-289	AP2B1_835-842	0.4424	0.2004	0
LYZ_52-59	AP2B1_835-842	0.3576	0.3104	0
LYZ_69-80	AP2B1_835-842	0.3333	0.3466	0
FUCA1_114-130	AP2B1_835-842	-0.0303	0.9338	0
FUCA1_163-173	AP2B1_835-842	0.2121	0.5563	0
FUCA1_344-354	AP2B1_835-842	-0.0303	0.9338	0
TCN2_300-313	AP2B1_835-842	-0.1879	0.6032	0
TCN2_393-399	AP2B1_835-842	-0.3091	0.3848	0
TCN2_45-59	AP2B1_835-842	-0.2	0.5796	0
TPP1_246-259	AP2B1_835-842	-0.4303	0.2145	0
TPP1_507-520	AP2B1_835-842	-0.3697	0.2931	0
TPP1_61-78	AP2B1_835-842	-0.3697	0.2931	0
APP_289-301	AP2B1_868-878	0.7455	0.0133	0
APP_439-450	AP2B1_868-878	0.7818	0.0075	0
BSA_421-433	AP2B1_868-878	-0.1636	0.6515	0
C9_146-154	AP2B1_868-878	-0.0061	0.9867	0
C9_186-194	AP2B1_868-878	-0.103	0.777	0
C9_232-242	AP2B1_868-878	-0.1394	0.7009	0
C9_473-483	AP2B1_868-878	-0.2606	0.4671	0
C9_497-508	AP2B1_868-878	-0.2606	0.4671	0
CTSB_210-220	AP2B1_868-878	0.0545	0.881	0
CTSB_58-71	AP2B1_868-878	-0.4667	0.1739	0
CTSB_80-87	AP2B1_868-878	0.2848	0.425	0
CTSD_112-122	AP2B1_868-878	-0.6848	0.0289	0
CTSD_349-357	AP2B1_868-878	-0.2121	0.5563	0
CTSD_55-72	AP2B1_868-878	-0.1394	0.7009	0
CatF_103-116	AP2B1_868-878	0.0061	0.9867	0
CatF_236-245	AP2B1_868-878	0.4424	0.2004	0
CatF_266-278	AP2B1_868-878	0.5636	0.0897	0
CatF_442-450	AP2B1_868-878	0.4545	0.1869	0
CTSL_105-116	AP2B1_868-878	0.6727	0.033	0
CTSZ_261-270	AP2B1_868-878	0.3576	0.3104	0
CTSZ_39-47	AP2B1_868-878	0.3091	0.3848	0
DPP7_113-123	AP2B1_868-878	0.5515	0.0984	0
DPP7_40-47	AP2B1_868-878	0.4182	0.2291	0
DPP7_449-462	AP2B1_868-878	0.1636	0.6515	0
GM2A_170-179	AP2B1_868-878	0.6242	0.0537	0
GM2A_89-96	AP2B1_868-878	0.7333	0.0158	0
HEXB_285-300	AP2B1_868-878	-0.0303	0.9338	0
HEXB_391-400	AP2B1_868-878	0.0061	0.9867	0
LAMP1_138-146	AP2B1_868-878	0.7333	0.0158	0
LAMP1_327-337	AP2B1_868-878	0.6364	0.0479	0
LAMP1_357-363	AP2B1_868-878	0.7818	0.0075	0
LAMP2_133-144	AP2B1_868-878	0.4909	0.1497	0
LAMP2_145-152	AP2B1_868-878	0.7576	0.0111	0
LAMP2_281-289	AP2B1_868-878	0.3697	0.2931	0
LYZ_52-59	AP2B1_868-878	0.3212	0.3655	0
LYZ_69-80	AP2B1_868-878	0.2848	0.425	0
FUCA1_114-130	AP2B1_868-878	-0.1394	0.7009	0
FUCA1_163-173	AP2B1_868-878	0.1394	0.7009	0
FUCA1_344-354	AP2B1_868-878	-0.1515	0.6761	0
TCN2_300-313	AP2B1_868-878	-0.3576	0.3104	0
TCN2_393-399	AP2B1_868-878	-0.5273	0.1173	0
TCN2_45-59	AP2B1_868-878	-0.3697	0.2931	0
TPP1_246-259	AP2B1_868-878	-0.4545	0.1869	0
TPP1_507-520	AP2B1_868-878	-0.4061	0.2443	0
TPP1_61-78	AP2B1_868-878	-0.4303	0.2145	0
BSA_421-433	APP_289-301	-0.0667	0.8548	0
C9_146-154	APP_289-301	-0.1152	0.7514	0
C9_186-194	APP_289-301	-0.1273	0.7261	0
C9_232-242	APP_289-301	-0.1394	0.7009	0
C9_473-483	APP_289-301	-0.1636	0.6515	0
C9_497-508	APP_289-301	-0.1636	0.6515	0
CTSB_210-220	APP_289-301	0.0667	0.8548	0
CTSB_58-71	APP_289-301	-0.3939	0.26	0
CTSB_80-87	APP_289-301	0.2848	0.425	0
CTSD_112-122	APP_289-301	-0.3455	0.3282	0
CTSD_349-357	APP_289-301	-0.103	0.777	0
CTSD_55-72	APP_289-301	0.3576	0.3104	0
CatF_103-116	APP_289-301	0.2364	0.5109	0
CatF_236-245	APP_289-301	0.5515	0.0984	0
CatF_266-278	APP_289-301	0.3212	0.3655	0
CatF_442-450	APP_289-301	0.3939	0.26	0
CTSL_105-116	APP_289-301	0.6364	0.0479	0
CTSZ_261-270	APP_289-301	0.4182	0.2291	0
CTSZ_39-47	APP_289-301	0.4303	0.2145	0
DPP7_113-123	APP_289-301	0.5273	0.1173	0
DPP7_40-47	APP_289-301	0.6485	0.0425	0
DPP7_449-462	APP_289-301	0.3455	0.3282	0
GM2A_170-179	APP_289-301	0.5758	0.0816	0
GM2A_89-96	APP_289-301	0.6606	0.0376	0
HEXB_285-300	APP_289-301	0.0667	0.8548	0
HEXB_391-400	APP_289-301	0.1879	0.6032	0
LAMP1_138-146	APP_289-301	0.7818	0.0075	0
LAMP1_357-363	APP_289-301	0.7091	0.0217	0
LAMP2_133-144	APP_289-301	0.5636	0.0897	0
LAMP2_145-152	APP_289-301	0.6121	0.06	0
LAMP2_153-161	APP_289-301	0.7212	0.0186	0
LAMP2_281-289	APP_289-301	0.3333	0.3466	0
LYZ_52-59	APP_289-301	0.4182	0.2291	0
LYZ_69-80	APP_289-301	0.4061	0.2443	0
FUCA1_114-130	APP_289-301	0.0909	0.8028	0
FUCA1_163-173	APP_289-301	0.2606	0.4671	0
FUCA1_344-354	APP_289-301	0.0303	0.9338	0
TCN2_300-313	APP_289-301	-0.1394	0.7009	0
TCN2_393-399	APP_289-301	-0.1636	0.6515	0
TCN2_45-59	APP_289-301	-0.103	0.777	0
TPP1_246-259	APP_289-301	0.1152	0.7514	0
TPP1_507-520	APP_289-301	-0.2364	0.5109	0
TPP1_61-78	APP_289-301	-0.2121	0.5563	0
Ubiquitin_12-27	APP_289-301	0.7212	0.0186	0
Ubiquitin_64-72	APP_289-301	0.7818	0.0075	0
BSA_421-433	APP_439-450	-0.1758	0.6272	0
C9_146-154	APP_439-450	0.0545	0.881	0
C9_186-194	APP_439-450	0.0182	0.9602	0
C9_232-242	APP_439-450	-0.0424	0.9074	0
C9_473-483	APP_439-450	-0.1273	0.7261	0
C9_497-508	APP_439-450	-0.1273	0.7261	0
CTSB_210-220	APP_439-450	-0.0667	0.8548	0
CTSB_58-71	APP_439-450	-0.6727	0.033	0
CTSB_80-87	APP_439-450	0.2364	0.5109	0
CTSD_112-122	APP_439-450	-0.503	0.1383	0
CTSD_349-357	APP_439-450	-0.0667	0.8548	0
CTSD_55-72	APP_439-450	0.2121	0.5563	0
CatF_103-116	APP_439-450	-0.0061	0.9867	0
CatF_236-245	APP_439-450	0.3939	0.26	0
CatF_266-278	APP_439-450	0.1758	0.6272	0
CatF_442-450	APP_439-450	0.2242	0.5334	0
CTSZ_261-270	APP_439-450	0.4182	0.2291	0
CTSZ_39-47	APP_439-450	0.4667	0.1739	0
DPP7_113-123	APP_439-450	0.7212	0.0186	0
DPP7_40-47	APP_439-450	0.7818	0.0075	0
DPP7_449-462	APP_439-450	0.4424	0.2004	0
GM2A_170-179	APP_439-450	0.3939	0.26	0
GM2A_89-96	APP_439-450	0.6364	0.0479	0
HEXB_285-300	APP_439-450	0.0424	0.9074	0
HEXB_391-400	APP_439-450	0.0545	0.881	0
LAMP1_357-363	APP_439-450	0.7333	0.0158	0
LAMP2_133-144	APP_439-450	0.4545	0.1869	0
LAMP2_145-152	APP_439-450	0.5515	0.0984	0
LAMP2_153-161	APP_439-450	0.697	0.0251	0
LAMP2_281-289	APP_439-450	0.2485	0.4888	0
LYZ_52-59	APP_439-450	0.4303	0.2145	0
LYZ_69-80	APP_439-450	0.3697	0.2931	0
FUCA1_114-130	APP_439-450	-0.2	0.5796	0
FUCA1_163-173	APP_439-450	-0.0061	0.9867	0
FUCA1_344-354	APP_439-450	-0.2485	0.4888	0
TCN2_300-313	APP_439-450	-0.4303	0.2145	0
TCN2_393-399	APP_439-450	-0.4667	0.1739	0
TCN2_45-59	APP_439-450	-0.3818	0.2763	0
TPP1_246-259	APP_439-450	-0.0909	0.8028	0
TPP1_507-520	APP_439-450	-0.3576	0.3104	0
TPP1_61-78	APP_439-450	-0.4182	0.2291	0
Ubiquitin_12-27	APP_439-450	0.7818	0.0075	0
AP2B1_712-719	Aβ1-42 (ng/L)	-0.1758	0.6272	0
AP2B1_835-842	Aβ1-42 (ng/L)	-0.1394	0.7009	0
AP2B1_868-878	Aβ1-42 (ng/L)	-0.1394	0.7009	0
APP_289-301	Aβ1-42 (ng/L)	-0.1273	0.7261	0
APP_439-450	Aβ1-42 (ng/L)	0.0545	0.881	0
BSA_421-433	Aβ1-42 (ng/L)	-0.4424	0.2004	0
C9_146-154	Aβ1-42 (ng/L)	0.5273	0.1173	0
C9_186-194	Aβ1-42 (ng/L)	0.5152	0.1276	0
C9_232-242	Aβ1-42 (ng/L)	0.3818	0.2763	0
C9_473-483	Aβ1-42 (ng/L)	0.2485	0.4888	0
C9_497-508	Aβ1-42 (ng/L)	0.2485	0.4888	0
CTSB_210-220	Aβ1-42 (ng/L)	0.2848	0.425	0
CTSB_58-71	Aβ1-42 (ng/L)	-0.4303	0.2145	0
CTSB_80-87	Aβ1-42 (ng/L)	-0.0061	0.9867	0
CTSD_112-122	Aβ1-42 (ng/L)	-0.103	0.777	0
CTSD_349-357	Aβ1-42 (ng/L)	0.4788	0.1615	0
CTSD_55-72	Aβ1-42 (ng/L)	-0.0788	0.8287	0
CatF_103-116	Aβ1-42 (ng/L)	-0.297	0.4047	0
CatF_236-245	Aβ1-42 (ng/L)	0.1758	0.6272	0
CatF_266-278	Aβ1-42 (ng/L)	-0.0061	0.9867	0
CatF_442-450	Aβ1-42 (ng/L)	0.1515	0.6761	0
CTSL_105-116	Aβ1-42 (ng/L)	0.0909	0.8028	0
CTSZ_261-270	Aβ1-42 (ng/L)	0.4061	0.2443	0
CTSZ_39-47	Aβ1-42 (ng/L)	0.3818	0.2763	0
DPP7_113-123	Aβ1-42 (ng/L)	0.2848	0.425	0
DPP7_40-47	Aβ1-42 (ng/L)	0.4788	0.1615	0
DPP7_449-462	Aβ1-42 (ng/L)	0.5636	0.0897	0
GM2A_170-179	Aβ1-42 (ng/L)	0.1152	0.7514	0
GM2A_89-96	Aβ1-42 (ng/L)	0.2242	0.5334	0
HEXB_285-300	Aβ1-42 (ng/L)	-0.3455	0.3282	0
HEXB_391-400	Aβ1-42 (ng/L)	-0.3697	0.2931	0
LAMP1_138-146	Aβ1-42 (ng/L)	0.103	0.777	0
LAMP1_327-337	Aβ1-42 (ng/L)	0.1152	0.7514	0
LAMP1_357-363	Aβ1-42 (ng/L)	0.0667	0.8548	0
LAMP2_133-144	Aβ1-42 (ng/L)	-0.5273	0.1173	0
LAMP2_145-152	Aβ1-42 (ng/L)	-0.1152	0.7514	0
LAMP2_153-161	Aβ1-42 (ng/L)	-0.1758	0.6272	0
LAMP2_281-289	Aβ1-42 (ng/L)	-0.4788	0.1615	0
LYZ_52-59	Aβ1-42 (ng/L)	0.4303	0.2145	0
LYZ_69-80	Aβ1-42 (ng/L)	0.297	0.4047	0
P-tau (ng/L)	Aβ1-42 (ng/L)	-0.5957	0.0692	0
FUCA1_114-130	Aβ1-42 (ng/L)	-0.2727	0.4458	0
FUCA1_163-173	Aβ1-42 (ng/L)	-0.2485	0.4888	0
FUCA1_344-354	Aβ1-42 (ng/L)	-0.103	0.777	0
TCN2_300-313	Aβ1-42 (ng/L)	-0.5758	0.0816	0
TCN2_393-399	Aβ1-42 (ng/L)	-0.1636	0.6515	0
TCN2_45-59	Aβ1-42 (ng/L)	-0.4182	0.2291	0
TPP1_246-259	Aβ1-42 (ng/L)	-0.297	0.4047	0
TPP1_507-520	Aβ1-42 (ng/L)	-0.4303	0.2145	0
TPP1_61-78	Aβ1-42 (ng/L)	-0.6121	0.06	0
T-tau (ng/L)	Aβ1-42 (ng/L)	-0.2242	0.5334	0
Ubiquitin_12-27	Aβ1-42 (ng/L)	-0.1152	0.7514	0
Ubiquitin_64-72	Aβ1-42 (ng/L)	-0.0424	0.9074	0
C9_146-154	BSA_421-433	0.3333	0.3466	0
C9_186-194	BSA_421-433	0.3576	0.3104	0
C9_232-242	BSA_421-433	0.5152	0.1276	0
C9_473-483	BSA_421-433	0.6242	0.0537	0
C9_497-508	BSA_421-433	0.6242	0.0537	0
CTSB_210-220	BSA_421-433	-0.3212	0.3655	0
CTSB_58-71	BSA_421-433	0.4545	0.1869	0
CTSB_80-87	BSA_421-433	-0.6	0.0667	0
CTSD_112-122	BSA_421-433	0.3939	0.26	0
CTSD_349-357	BSA_421-433	-0.103	0.777	0
CTSD_55-72	BSA_421-433	0.3333	0.3466	0
CatF_103-116	BSA_421-433	0.5152	0.1276	0
CatF_236-245	BSA_421-433	0.2	0.5796	0
CatF_266-278	BSA_421-433	0.2606	0.4671	0
CatF_442-450	BSA_421-433	0.2	0.5796	0
CTSL_105-116	BSA_421-433	-0.103	0.777	0
CTSZ_261-270	BSA_421-433	0.2485	0.4888	0
CTSZ_39-47	BSA_421-433	0.2242	0.5334	0
DPP7_113-123	BSA_421-433	0.0303	0.9338	0
DPP7_40-47	BSA_421-433	-0.0545	0.881	0
DPP7_449-462	BSA_421-433	-0.0909	0.8028	0
GM2A_170-179	BSA_421-433	-0.0545	0.881	0
GM2A_89-96	BSA_421-433	-0.0061	0.9867	0
HEXB_391-400	BSA_421-433	0.7939	0.0061	0
LAMP1_138-146	BSA_421-433	0.0182	0.9602	0
LAMP1_327-337	BSA_421-433	-0.1515	0.6761	0
LAMP1_357-363	BSA_421-433	-0.0182	0.9602	0
LAMP2_133-144	BSA_421-433	0.4788	0.1615	0
LAMP2_145-152	BSA_421-433	0.1515	0.6761	0
LAMP2_153-161	BSA_421-433	-0.1394	0.7009	0
LAMP2_281-289	BSA_421-433	0.3939	0.26	0
LYZ_52-59	BSA_421-433	0.2485	0.4888	0
LYZ_69-80	BSA_421-433	0.4061	0.2443	0
FUCA1_114-130	BSA_421-433	0.4424	0.2004	0
FUCA1_163-173	BSA_421-433	0.2848	0.425	0
FUCA1_344-354	BSA_421-433	0.5758	0.0816	0
TCN2_300-313	BSA_421-433	0.5879	0.0739	0
TCN2_393-399	BSA_421-433	0.1273	0.7261	0
TCN2_45-59	BSA_421-433	0.6727	0.033	0
TPP1_246-259	BSA_421-433	0.5636	0.0897	0
TPP1_507-520	BSA_421-433	0.7697	0.0092	0
TPP1_61-78	BSA_421-433	0.5879	0.0739	0
Ubiquitin_12-27	BSA_421-433	-0.1394	0.7009	0
Ubiquitin_64-72	BSA_421-433	-0.1758	0.6272	0
CTSB_210-220	C9_146-154	0.1273	0.7261	0
CTSB_58-71	C9_146-154	-0.1394	0.7009	0
CTSB_80-87	C9_146-154	-0.2727	0.4458	0
CTSD_112-122	C9_146-154	0.0303	0.9338	0
CTSD_349-357	C9_146-154	0.4545	0.1869	0
CTSD_55-72	C9_146-154	0.0909	0.8028	0
CatF_103-116	C9_146-154	-0.1152	0.7514	0
CatF_236-245	C9_146-154	0.3091	0.3848	0
CatF_266-278	C9_146-154	0.2242	0.5334	0
CatF_442-450	C9_146-154	0.3212	0.3655	0
CTSL_105-116	C9_146-154	0.3818	0.2763	0
CTSZ_261-270	C9_146-154	0.7576	0.0111	0
CTSZ_39-47	C9_146-154	0.6606	0.0376	0
DPP7_113-123	C9_146-154	0.503	0.1383	0
DPP7_40-47	C9_146-154	0.4182	0.2291	0
DPP7_449-462	C9_146-154	0.3212	0.3655	0
GM2A_170-179	C9_146-154	0.0182	0.9602	0
GM2A_89-96	C9_146-154	0.3333	0.3466	0
HEXB_285-300	C9_146-154	0.2485	0.4888	0
HEXB_391-400	C9_146-154	0.0909	0.8028	0
LAMP1_138-146	C9_146-154	0.4182	0.2291	0
LAMP1_327-337	C9_146-154	0.1152	0.7514	0
LAMP1_357-363	C9_146-154	0.4061	0.2443	0
LAMP2_133-144	C9_146-154	-0.0182	0.9602	0
LAMP2_145-152	C9_146-154	0.3818	0.2763	0
LAMP2_153-161	C9_146-154	0.0424	0.9074	0
LAMP2_281-289	C9_146-154	0.0909	0.8028	0
LYZ_69-80	C9_146-154	0.7697	0.0092	0
FUCA1_114-130	C9_146-154	-0.297	0.4047	0
FUCA1_163-173	C9_146-154	-0.3818	0.2763	0
FUCA1_344-354	C9_146-154	0.0182	0.9602	0
TCN2_300-313	C9_146-154	-0.2727	0.4458	0
TCN2_393-399	C9_146-154	-0.1758	0.6272	0
TCN2_45-59	C9_146-154	-0.0788	0.8287	0
TPP1_246-259	C9_146-154	0.0182	0.9602	0
TPP1_507-520	C9_146-154	0.3333	0.3466	0
TPP1_61-78	C9_146-154	-0.0424	0.9074	0
Ubiquitin_12-27	C9_146-154	-0.0788	0.8287	0
Ubiquitin_64-72	C9_146-154	-0.0424	0.9074	0
CTSB_210-220	C9_186-194	0.1636	0.6515	0
CTSB_58-71	C9_186-194	-0.0182	0.9602	0
CTSB_80-87	C9_186-194	-0.2	0.5796	0
CTSD_112-122	C9_186-194	0.2121	0.5563	0
CTSD_349-357	C9_186-194	0.4909	0.1497	0
CTSD_55-72	C9_186-194	0.2485	0.4888	0
CatF_103-116	C9_186-194	0.0061	0.9867	0
CatF_236-245	C9_186-194	0.3333	0.3466	0
CatF_266-278	C9_186-194	0.1636	0.6515	0
CatF_442-450	C9_186-194	0.3212	0.3655	0
CTSL_105-116	C9_186-194	0.297	0.4047	0
CTSZ_261-270	C9_186-194	0.7455	0.0133	0
CTSZ_39-47	C9_186-194	0.6	0.0667	0
DPP7_113-123	C9_186-194	0.4545	0.1869	0
DPP7_40-47	C9_186-194	0.3939	0.26	0
DPP7_449-462	C9_186-194	0.3333	0.3466	0
GM2A_170-179	C9_186-194	0.0061	0.9867	0
GM2A_89-96	C9_186-194	0.3333	0.3466	0
HEXB_285-300	C9_186-194	0.2121	0.5563	0
HEXB_391-400	C9_186-194	0.0545	0.881	0
LAMP1_138-146	C9_186-194	0.3697	0.2931	0
LAMP1_327-337	C9_186-194	0.0182	0.9602	0
LAMP1_357-363	C9_186-194	0.3455	0.3282	0
LAMP2_133-144	C9_186-194	0.0303	0.9338	0
LAMP2_145-152	C9_186-194	0.3455	0.3282	0
LAMP2_153-161	C9_186-194	-0.0182	0.9602	0
LAMP2_281-289	C9_186-194	0.1636	0.6515	0
LYZ_52-59	C9_186-194	0.7939	0.0061	0
LYZ_69-80	C9_186-194	0.7697	0.0092	0
FUCA1_114-130	C9_186-194	-0.2121	0.5563	0
FUCA1_163-173	C9_186-194	-0.3455	0.3282	0
FUCA1_344-354	C9_186-194	0.0788	0.8287	0
TCN2_300-313	C9_186-194	-0.1636	0.6515	0
TCN2_393-399	C9_186-194	-0.103	0.777	0
TCN2_45-59	C9_186-194	0.0424	0.9074	0
TPP1_246-259	C9_186-194	0.0909	0.8028	0
TPP1_507-520	C9_186-194	0.3818	0.2763	0
TPP1_61-78	C9_186-194	-0.0061	0.9867	0
Ubiquitin_12-27	C9_186-194	-0.1394	0.7009	0
Ubiquitin_64-72	C9_186-194	-0.0545	0.881	0
CTSB_210-220	C9_232-242	0.0909	0.8028	0
CTSB_58-71	C9_232-242	0.1273	0.7261	0
CTSB_80-87	C9_232-242	-0.2485	0.4888	0
CTSD_112-122	C9_232-242	0.297	0.4047	0
CTSD_349-357	C9_232-242	0.4303	0.2145	0
CTSD_55-72	C9_232-242	0.2727	0.4458	0
CatF_103-116	C9_232-242	0.1636	0.6515	0
CatF_236-245	C9_232-242	0.3939	0.26	0
CatF_266-278	C9_232-242	0.2364	0.5109	0
CatF_442-450	C9_232-242	0.3818	0.2763	0
CTSL_105-116	C9_232-242	0.2242	0.5334	0
CTSZ_261-270	C9_232-242	0.7455	0.0133	0
CTSZ_39-47	C9_232-242	0.6121	0.06	0
DPP7_113-123	C9_232-242	0.4424	0.2004	0
DPP7_40-47	C9_232-242	0.3212	0.3655	0
DPP7_449-462	C9_232-242	0.3212	0.3655	0
GM2A_170-179	C9_232-242	0.0303	0.9338	0
GM2A_89-96	C9_232-242	0.3212	0.3655	0
HEXB_285-300	C9_232-242	0.3212	0.3655	0
HEXB_391-400	C9_232-242	0.2121	0.5563	0
LAMP1_138-146	C9_232-242	0.3455	0.3282	0
LAMP1_327-337	C9_232-242	-0.0182	0.9602	0
LAMP1_357-363	C9_232-242	0.3212	0.3655	0
LAMP2_133-144	C9_232-242	0.103	0.777	0
LAMP2_145-152	C9_232-242	0.3333	0.3466	0
LAMP2_153-161	C9_232-242	-0.0424	0.9074	0
LAMP2_281-289	C9_232-242	0.2121	0.5563	0
LYZ_52-59	C9_232-242	0.7697	0.0092	0
LYZ_69-80	C9_232-242	0.7939	0.0061	0
FUCA1_114-130	C9_232-242	-0.0545	0.881	0
FUCA1_163-173	C9_232-242	-0.2121	0.5563	0
FUCA1_344-354	C9_232-242	0.2242	0.5334	0
TCN2_300-313	C9_232-242	0.0303	0.9338	0
TCN2_393-399	C9_232-242	-0.0182	0.9602	0
TCN2_45-59	C9_232-242	0.2364	0.5109	0
TPP1_246-259	C9_232-242	0.1879	0.6032	0
TPP1_507-520	C9_232-242	0.503	0.1383	0
TPP1_61-78	C9_232-242	0.1152	0.7514	0
Ubiquitin_12-27	C9_232-242	-0.1636	0.6515	0
Ubiquitin_64-72	C9_232-242	-0.0788	0.8287	0
CTSB_210-220	C9_473-483	0.0061	0.9867	0
CTSB_58-71	C9_473-483	0.2606	0.4671	0
CTSB_80-87	C9_473-483	-0.3333	0.3466	0
CTSD_112-122	C9_473-483	0.4061	0.2443	0
CTSD_349-357	C9_473-483	0.297	0.4047	0
CTSD_55-72	C9_473-483	0.3576	0.3104	0
CatF_103-116	C9_473-483	0.2848	0.425	0
CatF_236-245	C9_473-483	0.3091	0.3848	0
CatF_266-278	C9_473-483	0.1758	0.6272	0
CatF_442-450	C9_473-483	0.297	0.4047	0
CTSL_105-116	C9_473-483	0.1152	0.7514	0
CTSZ_261-270	C9_473-483	0.6364	0.0479	0
CTSZ_39-47	C9_473-483	0.5515	0.0984	0
DPP7_113-123	C9_473-483	0.2848	0.425	0
DPP7_40-47	C9_473-483	0.1879	0.6032	0
DPP7_449-462	C9_473-483	0.1515	0.6761	0
GM2A_170-179	C9_473-483	-0.0424	0.9074	0
GM2A_89-96	C9_473-483	0.1879	0.6032	0
HEXB_285-300	C9_473-483	0.4424	0.2004	0
HEXB_391-400	C9_473-483	0.3212	0.3655	0
LAMP1_138-146	C9_473-483	0.2606	0.4671	0
LAMP1_327-337	C9_473-483	-0.0788	0.8287	0
LAMP1_357-363	C9_473-483	0.2364	0.5109	0
LAMP2_133-144	C9_473-483	0.2121	0.5563	0
LAMP2_145-152	C9_473-483	0.2727	0.4458	0
LAMP2_153-161	C9_473-483	-0.1515	0.6761	0
LAMP2_281-289	C9_473-483	0.3212	0.3655	0
LYZ_52-59	C9_473-483	0.7091	0.0217	0
LYZ_69-80	C9_473-483	0.7576	0.0111	0
FUCA1_114-130	C9_473-483	0.0788	0.8287	0
FUCA1_163-173	C9_473-483	-0.1394	0.7009	0
FUCA1_344-354	C9_473-483	0.297	0.4047	0
TCN2_300-313	C9_473-483	0.1515	0.6761	0
TCN2_393-399	C9_473-483	0.103	0.777	0
TCN2_45-59	C9_473-483	0.3576	0.3104	0
TPP1_246-259	C9_473-483	0.3818	0.2763	0
TPP1_507-520	C9_473-483	0.6606	0.0376	0
TPP1_61-78	C9_473-483	0.297	0.4047	0
Ubiquitin_12-27	C9_473-483	-0.2485	0.4888	0
Ubiquitin_64-72	C9_473-483	-0.1636	0.6515	0
CTSB_210-220	C9_497-508	0.0061	0.9867	0
CTSB_58-71	C9_497-508	0.2606	0.4671	0
CTSB_80-87	C9_497-508	-0.3333	0.3466	0
CTSD_112-122	C9_497-508	0.4061	0.2443	0
CTSD_349-357	C9_497-508	0.297	0.4047	0
CTSD_55-72	C9_497-508	0.3576	0.3104	0
CatF_103-116	C9_497-508	0.2848	0.425	0
CatF_236-245	C9_497-508	0.3091	0.3848	0
CatF_266-278	C9_497-508	0.1758	0.6272	0
CatF_442-450	C9_497-508	0.297	0.4047	0
CTSL_105-116	C9_497-508	0.1152	0.7514	0
CTSZ_261-270	C9_497-508	0.6364	0.0479	0
CTSZ_39-47	C9_497-508	0.5515	0.0984	0
DPP7_113-123	C9_497-508	0.2848	0.425	0
DPP7_40-47	C9_497-508	0.1879	0.6032	0
DPP7_449-462	C9_497-508	0.1515	0.6761	0
GM2A_170-179	C9_497-508	-0.0424	0.9074	0
GM2A_89-96	C9_497-508	0.1879	0.6032	0
HEXB_285-300	C9_497-508	0.4424	0.2004	0
HEXB_391-400	C9_497-508	0.3212	0.3655	0
LAMP1_138-146	C9_497-508	0.2606	0.4671	0
LAMP1_327-337	C9_497-508	-0.0788	0.8287	0
LAMP1_357-363	C9_497-508	0.2364	0.5109	0
LAMP2_133-144	C9_497-508	0.2121	0.5563	0
LAMP2_145-152	C9_497-508	0.2727	0.4458	0
LAMP2_153-161	C9_497-508	-0.1515	0.6761	0
LAMP2_281-289	C9_497-508	0.3212	0.3655	0
LYZ_52-59	C9_497-508	0.7091	0.0217	0
LYZ_69-80	C9_497-508	0.7576	0.0111	0
FUCA1_114-130	C9_497-508	0.0788	0.8287	0
FUCA1_163-173	C9_497-508	-0.1394	0.7009	0
FUCA1_344-354	C9_497-508	0.297	0.4047	0
TCN2_300-313	C9_497-508	0.1515	0.6761	0
TCN2_393-399	C9_497-508	0.103	0.777	0
TCN2_45-59	C9_497-508	0.3576	0.3104	0
TPP1_246-259	C9_497-508	0.3818	0.2763	0
TPP1_507-520	C9_497-508	0.6606	0.0376	0
TPP1_61-78	C9_497-508	0.297	0.4047	0
Ubiquitin_12-27	C9_497-508	-0.2485	0.4888	0
Ubiquitin_64-72	C9_497-508	-0.1636	0.6515	0
CTSD_112-122	CTSB_210-220	0.2848	0.425	0
CTSD_349-357	CTSB_210-220	0.7333	0.0158	0
CTSD_55-72	CTSB_210-220	0.3333	0.3466	0
CatF_103-116	CTSB_210-220	-0.1394	0.7009	0
CatF_236-245	CTSB_210-220	0.4303	0.2145	0
CatF_266-278	CTSB_210-220	0.1636	0.6515	0
CatF_442-450	CTSB_210-220	0.4667	0.1739	0
CTSL_105-116	CTSB_210-220	-0.0788	0.8287	0
CTSZ_261-270	CTSB_210-220	0.3818	0.2763	0
CTSZ_39-47	CTSB_210-220	-0.0545	0.881	0
DPP7_113-123	CTSB_210-220	-0.1515	0.6761	0
DPP7_40-47	CTSB_210-220	0.0909	0.8028	0
DPP7_449-462	CTSB_210-220	0.1515	0.6761	0
GM2A_170-179	CTSB_210-220	0.4061	0.2443	0
GM2A_89-96	CTSB_210-220	0.3818	0.2763	0
HEXB_285-300	CTSB_210-220	-0.6606	0.0376	0
HEXB_391-400	CTSB_210-220	-0.5758	0.0816	0
LAMP1_138-146	CTSB_210-220	0.1394	0.7009	0
LAMP1_327-337	CTSB_210-220	-0.0424	0.9074	0
LAMP1_357-363	CTSB_210-220	0.1394	0.7009	0
LAMP2_133-144	CTSB_210-220	-0.2485	0.4888	0
LAMP2_145-152	CTSB_210-220	0.3818	0.2763	0
LAMP2_153-161	CTSB_210-220	0.2727	0.4458	0
LAMP2_281-289	CTSB_210-220	-0.0667	0.8548	0
LYZ_52-59	CTSB_210-220	0.297	0.4047	0
LYZ_69-80	CTSB_210-220	0.2242	0.5334	0
FUCA1_114-130	CTSB_210-220	-0.1515	0.6761	0
FUCA1_163-173	CTSB_210-220	-0.1273	0.7261	0
FUCA1_344-354	CTSB_210-220	0.103	0.777	0
TCN2_300-313	CTSB_210-220	0.0424	0.9074	0
TCN2_393-399	CTSB_210-220	0.4061	0.2443	0
TCN2_45-59	CTSB_210-220	0.0303	0.9338	0
TPP1_246-259	CTSB_210-220	-0.1394	0.7009	0
TPP1_507-520	CTSB_210-220	-0.1394	0.7009	0
TPP1_61-78	CTSB_210-220	-0.0667	0.8548	0
Ubiquitin_12-27	CTSB_210-220	-0.1758	0.6272	0
Ubiquitin_64-72	CTSB_210-220	-0.0667	0.8548	0
CTSB_210-220	CTSB_58-71	0.2606	0.4671	0
CTSB_80-87	CTSB_58-71	0.0909	0.8028	0
CTSD_112-122	CTSB_58-71	0.7576	0.0111	0
CTSD_349-357	CTSB_58-71	0.0667	0.8548	0
CTSD_55-72	CTSB_58-71	0.3091	0.3848	0
CatF_103-116	CTSB_58-71	0.5636	0.0897	0
CatF_236-245	CTSB_58-71	0.1394	0.7009	0
CatF_266-278	CTSB_58-71	0.1515	0.6761	0
CatF_442-450	CTSB_58-71	0.2364	0.5109	0
CTSL_105-116	CTSB_58-71	-0.6848	0.0289	0
CTSZ_261-270	CTSB_58-71	-0.103	0.777	0
CTSZ_39-47	CTSB_58-71	-0.3333	0.3466	0
DPP7_113-123	CTSB_58-71	-0.5636	0.0897	0
DPP7_40-47	CTSB_58-71	-0.6485	0.0425	0
DPP7_449-462	CTSB_58-71	-0.3576	0.3104	0
GM2A_170-179	CTSB_58-71	0.0545	0.881	0
GM2A_89-96	CTSB_58-71	-0.1636	0.6515	0
HEXB_285-300	CTSB_58-71	0.0303	0.9338	0
HEXB_391-400	CTSB_58-71	0.1394	0.7009	0
LAMP1_138-146	CTSB_58-71	-0.4061	0.2443	0
LAMP1_327-337	CTSB_58-71	-0.6121	0.06	0
LAMP1_357-363	CTSB_58-71	-0.3576	0.3104	0
LAMP2_133-144	CTSB_58-71	0.1273	0.7261	0
LAMP2_145-152	CTSB_58-71	-0.0545	0.881	0
LAMP2_153-161	CTSB_58-71	-0.2485	0.4888	0
LAMP2_281-289	CTSB_58-71	0.2848	0.425	0
LYZ_52-59	CTSB_58-71	-0.1636	0.6515	0
LYZ_69-80	CTSB_58-71	-0.0182	0.9602	0
FUCA1_114-130	CTSB_58-71	0.5758	0.0816	0
FUCA1_163-173	CTSB_58-71	0.3697	0.2931	0
FUCA1_344-354	CTSB_58-71	0.6	0.0667	0
TCN2_393-399	CTSB_58-71	0.6606	0.0376	0
TPP1_246-259	CTSB_58-71	0.3455	0.3282	0
TPP1_507-520	CTSB_58-71	0.5636	0.0897	0
TPP1_61-78	CTSB_58-71	0.6121	0.06	0
Ubiquitin_12-27	CTSB_58-71	-0.4788	0.1615	0
Ubiquitin_64-72	CTSB_58-71	-0.4182	0.2291	0
CTSB_210-220	CTSB_80-87	0.6121	0.06	0
CTSD_112-122	CTSB_80-87	0.0667	0.8548	0
CTSD_349-357	CTSB_80-87	0.3455	0.3282	0
CTSD_55-72	CTSB_80-87	0.1515	0.6761	0
CatF_103-116	CTSB_80-87	-0.0909	0.8028	0
CatF_236-245	CTSB_80-87	0.2485	0.4888	0
CatF_266-278	CTSB_80-87	-0.0545	0.881	0
CatF_442-450	CTSB_80-87	0.2	0.5796	0
CTSL_105-116	CTSB_80-87	0.1758	0.6272	0
CTSZ_261-270	CTSB_80-87	0.0788	0.8287	0
CTSZ_39-47	CTSB_80-87	-0.1758	0.6272	0
DPP7_113-123	CTSB_80-87	0.103	0.777	0
DPP7_40-47	CTSB_80-87	0.0182	0.9602	0
DPP7_449-462	CTSB_80-87	0.1273	0.7261	0
GM2A_170-179	CTSB_80-87	0.2727	0.4458	0
GM2A_89-96	CTSB_80-87	0.3333	0.3466	0
HEXB_391-400	CTSB_80-87	-0.697	0.0251	0
LAMP1_138-146	CTSB_80-87	0.2606	0.4671	0
LAMP1_327-337	CTSB_80-87	0.103	0.777	0
LAMP1_357-363	CTSB_80-87	0.2848	0.425	0
LAMP2_133-144	CTSB_80-87	-0.0788	0.8287	0
LAMP2_145-152	CTSB_80-87	0.297	0.4047	0
LAMP2_153-161	CTSB_80-87	0.4667	0.1739	0
LAMP2_281-289	CTSB_80-87	0.0788	0.8287	0
LYZ_52-59	CTSB_80-87	-0.0303	0.9338	0
LYZ_69-80	CTSB_80-87	-0.0788	0.8287	0
FUCA1_114-130	CTSB_80-87	-0.2364	0.5109	0
FUCA1_163-173	CTSB_80-87	-0.1636	0.6515	0
FUCA1_344-354	CTSB_80-87	-0.297	0.4047	0
TCN2_300-313	CTSB_80-87	0.0182	0.9602	0
TCN2_393-399	CTSB_80-87	0.2	0.5796	0
TCN2_45-59	CTSB_80-87	-0.0788	0.8287	0
TPP1_246-259	CTSB_80-87	-0.3091	0.3848	0
TPP1_507-520	CTSB_80-87	-0.3212	0.3655	0
TPP1_61-78	CTSB_80-87	-0.1758	0.6272	0
Ubiquitin_12-27	CTSB_80-87	0.1636	0.6515	0
Ubiquitin_64-72	CTSB_80-87	0.3212	0.3655	0
CTSD_349-357	CTSD_112-122	0.4061	0.2443	0
CatF_103-116	CTSD_112-122	0.4303	0.2145	0
CatF_236-245	CTSD_112-122	0.0788	0.8287	0
CatF_266-278	CTSD_112-122	-0.2606	0.4671	0
CatF_442-450	CTSD_112-122	0.0182	0.9602	0
CTSL_105-116	CTSD_112-122	-0.5879	0.0739	0
CTSZ_261-270	CTSD_112-122	-0.0182	0.9602	0
CTSZ_39-47	CTSD_112-122	-0.3091	0.3848	0
DPP7_113-123	CTSD_112-122	-0.4061	0.2443	0
DPP7_40-47	CTSD_112-122	-0.2242	0.5334	0
DPP7_449-462	CTSD_112-122	0.0061	0.9867	0
GM2A_170-179	CTSD_112-122	-0.1879	0.6032	0
GM2A_89-96	CTSD_112-122	-0.1879	0.6032	0
HEXB_285-300	CTSD_112-122	-0.0061	0.9867	0
HEXB_391-400	CTSD_112-122	-0.0061	0.9867	0
LAMP1_138-146	CTSD_112-122	-0.4303	0.2145	0
LAMP1_327-337	CTSD_112-122	-0.6242	0.0537	0
LAMP1_357-363	CTSD_112-122	-0.503	0.1383	0
LAMP2_133-144	CTSD_112-122	-0.0061	0.9867	0
LAMP2_145-152	CTSD_112-122	-0.2606	0.4671	0
LAMP2_153-161	CTSD_112-122	-0.503	0.1383	0
LAMP2_281-289	CTSD_112-122	0.1152	0.7514	0
LYZ_52-59	CTSD_112-122	-0.0667	0.8548	0
LYZ_69-80	CTSD_112-122	0.0182	0.9602	0
FUCA1_114-130	CTSD_112-122	0.3818	0.2763	0
FUCA1_163-173	CTSD_112-122	0.1152	0.7514	0
FUCA1_344-354	CTSD_112-122	0.4667	0.1739	0
TCN2_300-313	CTSD_112-122	0.697	0.0251	0
TCN2_393-399	CTSD_112-122	0.5515	0.0984	0
TCN2_45-59	CTSD_112-122	0.7333	0.0158	0
TPP1_246-259	CTSD_112-122	0.4909	0.1497	0
TPP1_507-520	CTSD_112-122	0.4788	0.1615	0
TPP1_61-78	CTSD_112-122	0.4424	0.2004	0
Ubiquitin_12-27	CTSD_112-122	-0.6364	0.0479	0
Ubiquitin_64-72	CTSD_112-122	-0.4788	0.1615	0
CatF_103-116	CTSD_349-357	-0.3212	0.3655	0
CatF_236-245	CTSD_349-357	0.3333	0.3466	0
CatF_266-278	CTSD_349-357	-0.1394	0.7009	0
CatF_442-450	CTSD_349-357	0.2485	0.4888	0
CTSL_105-116	CTSD_349-357	0.0788	0.8287	0
CTSZ_261-270	CTSD_349-357	0.5152	0.1276	0
CTSZ_39-47	CTSD_349-357	0.1636	0.6515	0
DPP7_113-123	CTSD_349-357	0.1879	0.6032	0
DPP7_40-47	CTSD_349-357	0.3939	0.26	0
DPP7_449-462	CTSD_349-357	0.5273	0.1173	0
GM2A_170-179	CTSD_349-357	0.0061	0.9867	0
GM2A_89-96	CTSD_349-357	0.2121	0.5563	0
HEXB_285-300	CTSD_349-357	-0.4424	0.2004	0
HEXB_391-400	CTSD_349-357	-0.4061	0.2443	0
LAMP1_138-146	CTSD_349-357	0.1152	0.7514	0
LAMP1_327-337	CTSD_349-357	-0.0424	0.9074	0
LAMP1_357-363	CTSD_349-357	0.0182	0.9602	0
LAMP2_133-144	CTSD_349-357	-0.503	0.1383	0
LAMP2_145-152	CTSD_349-357	0.103	0.777	0
LAMP2_153-161	CTSD_349-357	-0.0667	0.8548	0
LAMP2_281-289	CTSD_349-357	-0.3818	0.2763	0
LYZ_52-59	CTSD_349-357	0.3818	0.2763	0
LYZ_69-80	CTSD_349-357	0.3212	0.3655	0
FUCA1_114-130	CTSD_349-357	-0.3697	0.2931	0
FUCA1_163-173	CTSD_349-357	-0.4182	0.2291	0
FUCA1_344-354	CTSD_349-357	-0.0061	0.9867	0
TCN2_300-313	CTSD_349-357	0.0182	0.9602	0
TCN2_393-399	CTSD_349-357	0.3091	0.3848	0
TCN2_45-59	CTSD_349-357	0.0545	0.881	0
TPP1_246-259	CTSD_349-357	0.0303	0.9338	0
TPP1_507-520	CTSD_349-357	0.0303	0.9338	0
TPP1_61-78	CTSD_349-357	-0.0303	0.9338	0
Ubiquitin_12-27	CTSD_349-357	-0.4303	0.2145	0
Ubiquitin_64-72	CTSD_349-357	-0.297	0.4047	0
CTSD_112-122	CTSD_55-72	0.697	0.0251	0
CTSD_349-357	CTSD_55-72	0.3697	0.2931	0
CatF_103-116	CTSD_55-72	0.4424	0.2004	0
CatF_236-245	CTSD_55-72	0.3576	0.3104	0
CatF_266-278	CTSD_55-72	-0.1273	0.7261	0
CatF_442-450	CTSD_55-72	0.1879	0.6032	0
CTSL_105-116	CTSD_55-72	-0.0424	0.9074	0
CTSZ_261-270	CTSD_55-72	0.297	0.4047	0
CTSZ_39-47	CTSD_55-72	-0.0061	0.9867	0
DPP7_113-123	CTSD_55-72	-0.0303	0.9338	0
DPP7_40-47	CTSD_55-72	0.3455	0.3282	0
DPP7_449-462	CTSD_55-72	0.2121	0.5563	0
GM2A_170-179	CTSD_55-72	0.1273	0.7261	0
GM2A_89-96	CTSD_55-72	0.2727	0.4458	0
HEXB_285-300	CTSD_55-72	0.103	0.777	0
HEXB_391-400	CTSD_55-72	0.0545	0.881	0
LAMP1_138-146	CTSD_55-72	0.1394	0.7009	0
LAMP1_327-337	CTSD_55-72	-0.0545	0.881	0
LAMP1_357-363	CTSD_55-72	0.0061	0.9867	0
LAMP2_133-144	CTSD_55-72	0.4182	0.2291	0
LAMP2_145-152	CTSD_55-72	0.2121	0.5563	0
LAMP2_153-161	CTSD_55-72	-0.0061	0.9867	0
LAMP2_281-289	CTSD_55-72	0.3939	0.26	0
LYZ_52-59	CTSD_55-72	0.3091	0.3848	0
LYZ_69-80	CTSD_55-72	0.3333	0.3466	0
FUCA1_114-130	CTSD_55-72	0.2727	0.4458	0
FUCA1_163-173	CTSD_55-72	0.1273	0.7261	0
FUCA1_344-354	CTSD_55-72	0.3576	0.3104	0
TCN2_300-313	CTSD_55-72	0.3697	0.2931	0
TCN2_393-399	CTSD_55-72	0.2606	0.4671	0
TCN2_45-59	CTSD_55-72	0.4545	0.1869	0
TPP1_246-259	CTSD_55-72	0.5394	0.1076	0
TPP1_507-520	CTSD_55-72	0.2848	0.425	0
TPP1_61-78	CTSD_55-72	0.2121	0.5563	0
Ubiquitin_12-27	CTSD_55-72	-0.103	0.777	0
Ubiquitin_64-72	CTSD_55-72	0.0788	0.8287	0
CatF_236-245	CatF_103-116	0.5273	0.1173	0
CatF_266-278	CatF_103-116	0.503	0.1383	0
CatF_442-450	CatF_103-116	0.5152	0.1276	0
CTSL_105-116	CatF_103-116	-0.3455	0.3282	0
CTSZ_261-270	CatF_103-116	0.1636	0.6515	0
CTSZ_39-47	CatF_103-116	0.0909	0.8028	0
DPP7_113-123	CatF_103-116	-0.0545	0.881	0
DPP7_40-47	CatF_103-116	-0.0909	0.8028	0
DPP7_449-462	CatF_103-116	0.0667	0.8548	0
GM2A_170-179	CatF_103-116	0.503	0.1383	0
GM2A_89-96	CatF_103-116	0.3455	0.3282	0
HEXB_285-300	CatF_103-116	0.3697	0.2931	0
HEXB_391-400	CatF_103-116	0.5273	0.1173	0
LAMP1_138-146	CatF_103-116	0.0424	0.9074	0
LAMP1_327-337	CatF_103-116	-0.1152	0.7514	0
LAMP1_357-363	CatF_103-116	0.0424	0.9074	0
LAMP2_133-144	CatF_103-116	0.6242	0.0537	0
LAMP2_145-152	CatF_103-116	0.1515	0.6761	0
LAMP2_153-161	CatF_103-116	0.0788	0.8287	0
LAMP2_281-289	CatF_103-116	0.5152	0.1276	0
LYZ_52-59	CatF_103-116	0.1394	0.7009	0
LYZ_69-80	CatF_103-116	0.297	0.4047	0
TCN2_300-313	CatF_103-116	0.6606	0.0376	0
TCN2_393-399	CatF_103-116	0.1879	0.6032	0
TCN2_45-59	CatF_103-116	0.7697	0.0092	0
TPP1_246-259	CatF_103-116	0.3091	0.3848	0
TPP1_507-520	CatF_103-116	0.2364	0.5109	0
TPP1_61-78	CatF_103-116	0.1394	0.7009	0
Ubiquitin_12-27	CatF_103-116	0.2	0.5796	0
Ubiquitin_64-72	CatF_103-116	0.2848	0.425	0
CatF_266-278	CatF_236-245	0.7576	0.0111	0
CTSL_105-116	CatF_236-245	0.2121	0.5563	0
CTSZ_39-47	CatF_236-245	0.5879	0.0739	0
DPP7_113-123	CatF_236-245	0.4909	0.1497	0
DPP7_40-47	CatF_236-245	0.503	0.1383	0
DPP7_449-462	CatF_236-245	0.6121	0.06	0
HEXB_285-300	CatF_236-245	-0.0182	0.9602	0
HEXB_391-400	CatF_236-245	0.2364	0.5109	0
LAMP1_138-146	CatF_236-245	0.6242	0.0537	0
LAMP1_327-337	CatF_236-245	0.4182	0.2291	0
LAMP1_357-363	CatF_236-245	0.5879	0.0739	0
LAMP2_133-144	CatF_236-245	0.2848	0.425	0
LAMP2_145-152	CatF_236-245	0.6242	0.0537	0
LAMP2_153-161	CatF_236-245	0.5515	0.0984	0
LAMP2_281-289	CatF_236-245	0.1758	0.6272	0
LYZ_52-59	CatF_236-245	0.6848	0.0289	0
LYZ_69-80	CatF_236-245	0.7455	0.0133	0
FUCA1_114-130	CatF_236-245	0.4061	0.2443	0
FUCA1_163-173	CatF_236-245	0.4909	0.1497	0
FUCA1_344-354	CatF_236-245	0.6	0.0667	0
TCN2_300-313	CatF_236-245	0.2606	0.4671	0
TCN2_393-399	CatF_236-245	0.1394	0.7009	0
TCN2_45-59	CatF_236-245	0.3939	0.26	0
TPP1_246-259	CatF_236-245	0.0182	0.9602	0
TPP1_507-520	CatF_236-245	-0.0545	0.881	0
TPP1_61-78	CatF_236-245	-0.1879	0.6032	0
Ubiquitin_12-27	CatF_236-245	0.3697	0.2931	0
Ubiquitin_64-72	CatF_236-245	0.4788	0.1615	0
CTSL_105-116	CatF_266-278	0.0667	0.8548	0
CTSZ_261-270	CatF_266-278	0.5515	0.0984	0
CTSZ_39-47	CatF_266-278	0.4424	0.2004	0
DPP7_113-123	CatF_266-278	0.2606	0.4671	0
DPP7_40-47	CatF_266-278	0.103	0.777	0
DPP7_449-462	CatF_266-278	0.1758	0.6272	0
GM2A_89-96	CatF_266-278	0.7212	0.0186	0
HEXB_285-300	CatF_266-278	0.1879	0.6032	0
HEXB_391-400	CatF_266-278	0.3697	0.2931	0
LAMP1_138-146	CatF_266-278	0.4424	0.2004	0
LAMP1_327-337	CatF_266-278	0.2727	0.4458	0
LAMP1_357-363	CatF_266-278	0.5273	0.1173	0
LAMP2_133-144	CatF_266-278	0.3818	0.2763	0
LAMP2_145-152	CatF_266-278	0.6242	0.0537	0
LAMP2_153-161	CatF_266-278	0.6	0.0667	0
LAMP2_281-289	CatF_266-278	0.297	0.4047	0
LYZ_52-59	CatF_266-278	0.4788	0.1615	0
LYZ_69-80	CatF_266-278	0.5515	0.0984	0
FUCA1_114-130	CatF_266-278	0.4788	0.1615	0
FUCA1_163-173	CatF_266-278	0.6242	0.0537	0
FUCA1_344-354	CatF_266-278	0.6	0.0667	0
TCN2_300-313	CatF_266-278	0.1515	0.6761	0
TCN2_393-399	CatF_266-278	-0.0909	0.8028	0
TCN2_45-59	CatF_266-278	0.2485	0.4888	0
TPP1_246-259	CatF_266-278	-0.2485	0.4888	0
TPP1_507-520	CatF_266-278	-0.0788	0.8287	0
TPP1_61-78	CatF_266-278	-0.2	0.5796	0
Ubiquitin_12-27	CatF_266-278	0.5273	0.1173	0
Ubiquitin_64-72	CatF_266-278	0.4788	0.1615	0
CTSL_105-116	CatF_442-450	0.0909	0.8028	0
CTSZ_261-270	CatF_442-450	0.7576	0.0111	0
CTSZ_39-47	CatF_442-450	0.503	0.1383	0
DPP7_113-123	CatF_442-450	0.3455	0.3282	0
DPP7_40-47	CatF_442-450	0.297	0.4047	0
DPP7_449-462	CatF_442-450	0.4303	0.2145	0
HEXB_285-300	CatF_442-450	-0.0303	0.9338	0
HEXB_391-400	CatF_442-450	0.2	0.5796	0
LAMP1_138-146	CatF_442-450	0.5273	0.1173	0
LAMP1_327-337	CatF_442-450	0.2848	0.425	0
LAMP1_357-363	CatF_442-450	0.5515	0.0984	0
LAMP2_133-144	CatF_442-450	0.2727	0.4458	0
LAMP2_145-152	CatF_442-450	0.6606	0.0376	0
LAMP2_153-161	CatF_442-450	0.5758	0.0816	0
LAMP2_281-289	CatF_442-450	0.2242	0.5334	0
LYZ_52-59	CatF_442-450	0.6364	0.0479	0
LYZ_69-80	CatF_442-450	0.697	0.0251	0
FUCA1_114-130	CatF_442-450	0.4303	0.2145	0
FUCA1_163-173	CatF_442-450	0.5273	0.1173	0
FUCA1_344-354	CatF_442-450	0.6364	0.0479	0
TCN2_300-313	CatF_442-450	0.2485	0.4888	0
TCN2_393-399	CatF_442-450	0.1152	0.7514	0
TCN2_45-59	CatF_442-450	0.3697	0.2931	0
TPP1_246-259	CatF_442-450	-0.1273	0.7261	0
TPP1_507-520	CatF_442-450	-0.0545	0.881	0
TPP1_61-78	CatF_442-450	-0.1879	0.6032	0
Ubiquitin_12-27	CatF_442-450	0.3697	0.2931	0
Ubiquitin_64-72	CatF_442-450	0.4303	0.2145	0
CTSZ_261-270	CTSL_105-116	0.5152	0.1276	0
CTSZ_39-47	CTSL_105-116	0.6242	0.0537	0
DPP7_40-47	CTSL_105-116	0.6606	0.0376	0
DPP7_449-462	CTSL_105-116	0.297	0.4047	0
GM2A_170-179	CTSL_105-116	0.0909	0.8028	0
GM2A_89-96	CTSL_105-116	0.4424	0.2004	0
HEXB_285-300	CTSL_105-116	0.0667	0.8548	0
HEXB_391-400	CTSL_105-116	0.0061	0.9867	0
LAMP1_327-337	CTSL_105-116	0.7939	0.0061	0
LAMP2_133-144	CTSL_105-116	0.2485	0.4888	0
LAMP2_145-152	CTSL_105-116	0.6	0.0667	0
LAMP2_153-161	CTSL_105-116	0.6242	0.0537	0
LAMP2_281-289	CTSL_105-116	0.1758	0.6272	0
LYZ_52-59	CTSL_105-116	0.5515	0.0984	0
LYZ_69-80	CTSL_105-116	0.4788	0.1615	0
FUCA1_114-130	CTSL_105-116	-0.5758	0.0816	0
FUCA1_163-173	CTSL_105-116	-0.4424	0.2004	0
FUCA1_344-354	CTSL_105-116	-0.5273	0.1173	0
TCN2_300-313	CTSL_105-116	-0.5394	0.1076	0
TCN2_393-399	CTSL_105-116	-0.4061	0.2443	0
TCN2_45-59	CTSL_105-116	-0.503	0.1383	0
TPP1_246-259	CTSL_105-116	-0.0788	0.8287	0
TPP1_507-520	CTSL_105-116	-0.0545	0.881	0
TPP1_61-78	CTSL_105-116	-0.1758	0.6272	0
Ubiquitin_12-27	CTSL_105-116	0.5515	0.0984	0
Ubiquitin_64-72	CTSL_105-116	0.5636	0.0897	0
DPP7_113-123	CTSZ_261-270	0.6848	0.0289	0
DPP7_40-47	CTSZ_261-270	0.6606	0.0376	0
DPP7_449-462	CTSZ_261-270	0.6	0.0667	0
GM2A_170-179	CTSZ_261-270	0.5394	0.1076	0
GM2A_89-96	CTSZ_261-270	0.7576	0.0111	0
HEXB_285-300	CTSZ_261-270	0.0909	0.8028	0
HEXB_391-400	CTSZ_261-270	0.1758	0.6272	0
LAMP1_138-146	CTSZ_261-270	0.7697	0.0092	0
LAMP1_327-337	CTSZ_261-270	0.503	0.1383	0
LAMP1_357-363	CTSZ_261-270	0.7212	0.0186	0
LAMP2_133-144	CTSZ_261-270	0.1636	0.6515	0
LAMP2_145-152	CTSZ_261-270	0.6848	0.0289	0
LAMP2_153-161	CTSZ_261-270	0.4545	0.1869	0
LAMP2_281-289	CTSZ_261-270	0.1394	0.7009	0
FUCA1_114-130	CTSZ_261-270	-0.0303	0.9338	0
FUCA1_163-173	CTSZ_261-270	-0.0061	0.9867	0
FUCA1_344-354	CTSZ_261-270	0.2727	0.4458	0
TCN2_300-313	CTSZ_261-270	-0.0667	0.8548	0
TCN2_393-399	CTSZ_261-270	0.0182	0.9602	0
TCN2_45-59	CTSZ_261-270	0.1152	0.7514	0
TPP1_246-259	CTSZ_261-270	0.0788	0.8287	0
TPP1_507-520	CTSZ_261-270	0.1515	0.6761	0
TPP1_61-78	CTSZ_261-270	-0.1152	0.7514	0
Ubiquitin_12-27	CTSZ_261-270	0.2242	0.5334	0
Ubiquitin_64-72	CTSZ_261-270	0.3212	0.3655	0
DPP7_113-123	CTSZ_39-47	0.7576	0.0111	0
DPP7_40-47	CTSZ_39-47	0.6242	0.0537	0
DPP7_449-462	CTSZ_39-47	0.5152	0.1276	0
GM2A_170-179	CTSZ_39-47	0.3455	0.3282	0
GM2A_89-96	CTSZ_39-47	0.4909	0.1497	0
HEXB_285-300	CTSZ_39-47	0.3091	0.3848	0
HEXB_391-400	CTSZ_39-47	0.4303	0.2145	0
LAMP1_138-146	CTSZ_39-47	0.7818	0.0075	0
LAMP1_327-337	CTSZ_39-47	0.7333	0.0158	0
LAMP1_357-363	CTSZ_39-47	0.7333	0.0158	0
LAMP2_133-144	CTSZ_39-47	0.1152	0.7514	0
LAMP2_145-152	CTSZ_39-47	0.4667	0.1739	0
LAMP2_153-161	CTSZ_39-47	0.297	0.4047	0
LAMP2_281-289	CTSZ_39-47	-0.0061	0.9867	0
FUCA1_114-130	CTSZ_39-47	-0.0303	0.9338	0
FUCA1_163-173	CTSZ_39-47	-0.0061	0.9867	0
FUCA1_344-354	CTSZ_39-47	0.1273	0.7261	0
TCN2_300-313	CTSZ_39-47	-0.2	0.5796	0
TCN2_393-399	CTSZ_39-47	-0.0061	0.9867	0
TCN2_45-59	CTSZ_39-47	-0.0182	0.9602	0
TPP1_246-259	CTSZ_39-47	0.2242	0.5334	0
TPP1_507-520	CTSZ_39-47	0.1879	0.6032	0
TPP1_61-78	CTSZ_39-47	-0.0424	0.9074	0
Ubiquitin_12-27	CTSZ_39-47	0.2364	0.5109	0
Ubiquitin_64-72	CTSZ_39-47	0.2727	0.4458	0
DPP7_449-462	DPP7_113-123	0.697	0.0251	0
GM2A_170-179	DPP7_113-123	0.2485	0.4888	0
GM2A_89-96	DPP7_113-123	0.6	0.0667	0
HEXB_285-300	DPP7_113-123	0.103	0.777	0
HEXB_391-400	DPP7_113-123	0.1636	0.6515	0
LAMP1_138-146	DPP7_113-123	0.7939	0.0061	0
LAMP1_327-337	DPP7_113-123	0.6727	0.033	0
LAMP1_357-363	DPP7_113-123	0.7333	0.0158	0
LAMP2_133-144	DPP7_113-123	0.1394	0.7009	0
LAMP2_145-152	DPP7_113-123	0.4424	0.2004	0
LAMP2_153-161	DPP7_113-123	0.4909	0.1497	0
LAMP2_281-289	DPP7_113-123	0.0061	0.9867	0
LYZ_52-59	DPP7_113-123	0.6121	0.06	0
LYZ_69-80	DPP7_113-123	0.6	0.0667	0
FUCA1_114-130	DPP7_113-123	-0.2848	0.425	0
FUCA1_163-173	DPP7_113-123	-0.1636	0.6515	0
FUCA1_344-354	DPP7_113-123	-0.1879	0.6032	0
TCN2_300-313	DPP7_113-123	-0.3212	0.3655	0
TCN2_393-399	DPP7_113-123	-0.4182	0.2291	0
TCN2_45-59	DPP7_113-123	-0.2121	0.5563	0
TPP1_246-259	DPP7_113-123	-0.1515	0.6761	0
TPP1_507-520	DPP7_113-123	-0.1273	0.7261	0
TPP1_61-78	DPP7_113-123	-0.3576	0.3104	0
Ubiquitin_12-27	DPP7_113-123	0.5152	0.1276	0
Ubiquitin_64-72	DPP7_113-123	0.5758	0.0816	0
DPP7_113-123	DPP7_40-47	0.7697	0.0092	0
GM2A_170-179	DPP7_40-47	0.297	0.4047	0
GM2A_89-96	DPP7_40-47	0.6	0.0667	0
HEXB_285-300	DPP7_40-47	0.0667	0.8548	0
HEXB_391-400	DPP7_40-47	0.0788	0.8287	0
LAMP1_138-146	DPP7_40-47	0.6606	0.0376	0
LAMP1_327-337	DPP7_40-47	0.6606	0.0376	0
LAMP1_357-363	DPP7_40-47	0.5152	0.1276	0
LAMP2_133-144	DPP7_40-47	0.0788	0.8287	0
LAMP2_145-152	DPP7_40-47	0.3333	0.3466	0
LAMP2_153-161	DPP7_40-47	0.3333	0.3466	0
LAMP2_281-289	DPP7_40-47	-0.1273	0.7261	0
LYZ_52-59	DPP7_40-47	0.6242	0.0537	0
LYZ_69-80	DPP7_40-47	0.5515	0.0984	0
FUCA1_114-130	DPP7_40-47	-0.2242	0.5334	0
FUCA1_163-173	DPP7_40-47	-0.103	0.777	0
FUCA1_344-354	DPP7_40-47	-0.0545	0.881	0
TCN2_300-313	DPP7_40-47	-0.4061	0.2443	0
TCN2_393-399	DPP7_40-47	-0.3455	0.3282	0
TCN2_45-59	DPP7_40-47	-0.2727	0.4458	0
TPP1_246-259	DPP7_40-47	0.0182	0.9602	0
TPP1_507-520	DPP7_40-47	-0.297	0.4047	0
TPP1_61-78	DPP7_40-47	-0.4667	0.1739	0
Ubiquitin_12-27	DPP7_40-47	0.3939	0.26	0
Ubiquitin_64-72	DPP7_40-47	0.4788	0.1615	0
GM2A_170-179	DPP7_449-462	0.3455	0.3282	0
GM2A_89-96	DPP7_449-462	0.5394	0.1076	0
HEXB_285-300	DPP7_449-462	-0.1394	0.7009	0
HEXB_391-400	DPP7_449-462	0.0424	0.9074	0
LAMP1_138-146	DPP7_449-462	0.3818	0.2763	0
LAMP1_327-337	DPP7_449-462	0.3818	0.2763	0
LAMP1_357-363	DPP7_449-462	0.2485	0.4888	0
LAMP2_133-144	DPP7_449-462	-0.2364	0.5109	0
LAMP2_145-152	DPP7_449-462	0.0424	0.9074	0
LAMP2_153-161	DPP7_449-462	0.1152	0.7514	0
LAMP2_281-289	DPP7_449-462	-0.4182	0.2291	0
LYZ_52-59	DPP7_449-462	0.4303	0.2145	0
LYZ_69-80	DPP7_449-462	0.4182	0.2291	0
FUCA1_114-130	DPP7_449-462	0.0061	0.9867	0
FUCA1_163-173	DPP7_449-462	0.103	0.777	0
FUCA1_344-354	DPP7_449-462	0.1879	0.6032	0
TCN2_300-313	DPP7_449-462	-0.0909	0.8028	0
TCN2_393-399	DPP7_449-462	-0.1394	0.7009	0
TCN2_45-59	DPP7_449-462	0.0303	0.9338	0
TPP1_246-259	DPP7_449-462	-0.103	0.777	0
TPP1_507-520	DPP7_449-462	-0.3697	0.2931	0
TPP1_61-78	DPP7_449-462	-0.5152	0.1276	0
Ubiquitin_12-27	DPP7_449-462	0.1636	0.6515	0
Ubiquitin_64-72	DPP7_449-462	0.2848	0.425	0
HEXB_285-300	GM2A_170-179	-0.1273	0.7261	0
HEXB_391-400	GM2A_170-179	0.103	0.777	0
LAMP1_138-146	GM2A_170-179	0.503	0.1383	0
LAMP1_327-337	GM2A_170-179	0.3818	0.2763	0
LAMP1_357-363	GM2A_170-179	0.5394	0.1076	0
LAMP2_133-144	GM2A_170-179	0.3576	0.3104	0
LAMP2_145-152	GM2A_170-179	0.6242	0.0537	0
LAMP2_153-161	GM2A_170-179	0.6848	0.0289	0
LAMP2_281-289	GM2A_170-179	0.2485	0.4888	0
LYZ_52-59	GM2A_170-179	0.4545	0.1869	0
LYZ_69-80	GM2A_170-179	0.4788	0.1615	0
FUCA1_114-130	GM2A_170-179	0.4667	0.1739	0
FUCA1_163-173	GM2A_170-179	0.6485	0.0425	0
FUCA1_344-354	GM2A_170-179	0.5394	0.1076	0
TCN2_300-313	GM2A_170-179	0.0788	0.8287	0
TCN2_393-399	GM2A_170-179	-0.0303	0.9338	0
TCN2_45-59	GM2A_170-179	0.1636	0.6515	0
TPP1_246-259	GM2A_170-179	-0.2606	0.4671	0
TPP1_507-520	GM2A_170-179	-0.3576	0.3104	0
TPP1_61-78	GM2A_170-179	-0.3939	0.26	0
Ubiquitin_12-27	GM2A_170-179	0.6	0.0667	0
Ubiquitin_64-72	GM2A_170-179	0.6364	0.0479	0
HEXB_285-300	GM2A_89-96	-0.103	0.777	0
HEXB_391-400	GM2A_89-96	-0.0061	0.9867	0
LAMP1_138-146	GM2A_89-96	0.7333	0.0158	0
LAMP1_327-337	GM2A_89-96	0.4545	0.1869	0
LAMP1_357-363	GM2A_89-96	0.7333	0.0158	0
LAMP2_133-144	GM2A_89-96	0.4303	0.2145	0
LAMP2_145-152	GM2A_89-96	0.7818	0.0075	0
LAMP2_153-161	GM2A_89-96	0.7939	0.0061	0
LAMP2_281-289	GM2A_89-96	0.3576	0.3104	0
LYZ_52-59	GM2A_89-96	0.6727	0.033	0
LYZ_69-80	GM2A_89-96	0.6606	0.0376	0
FUCA1_114-130	GM2A_89-96	0.1394	0.7009	0
FUCA1_163-173	GM2A_89-96	0.3091	0.3848	0
FUCA1_344-354	GM2A_89-96	0.2848	0.425	0
TCN2_300-313	GM2A_89-96	-0.1152	0.7514	0
TCN2_393-399	GM2A_89-96	-0.297	0.4047	0
TCN2_45-59	GM2A_89-96	0.0061	0.9867	0
TPP1_246-259	GM2A_89-96	-0.3212	0.3655	0
TPP1_507-520	GM2A_89-96	-0.3091	0.3848	0
TPP1_61-78	GM2A_89-96	-0.4909	0.1497	0
Ubiquitin_12-27	GM2A_89-96	0.697	0.0251	0
Ubiquitin_64-72	GM2A_89-96	0.7818	0.0075	0
LAMP1_138-146	HEXB_285-300	0.0667	0.8548	0
LAMP1_327-337	HEXB_285-300	0.0909	0.8028	0
LAMP1_357-363	HEXB_285-300	0.0303	0.9338	0
LAMP2_133-144	HEXB_285-300	0.5152	0.1276	0
LAMP2_145-152	HEXB_285-300	0.0424	0.9074	0
LAMP2_153-161	HEXB_285-300	-0.1515	0.6761	0
LAMP2_281-289	HEXB_285-300	0.3212	0.3655	0
LYZ_52-59	HEXB_285-300	0.1879	0.6032	0
LYZ_69-80	HEXB_285-300	0.297	0.4047	0
FUCA1_114-130	HEXB_285-300	0.3576	0.3104	0
FUCA1_163-173	HEXB_285-300	0.2727	0.4458	0
FUCA1_344-354	HEXB_285-300	0.3697	0.2931	0
TCN2_300-313	HEXB_285-300	0.2121	0.5563	0
TCN2_393-399	HEXB_285-300	-0.1636	0.6515	0
TCN2_45-59	HEXB_285-300	0.3091	0.3848	0
TPP1_246-259	HEXB_285-300	0.503	0.1383	0
TPP1_507-520	HEXB_285-300	0.5515	0.0984	0
TPP1_61-78	HEXB_285-300	0.3818	0.2763	0
Ubiquitin_12-27	HEXB_285-300	0.0788	0.8287	0
Ubiquitin_64-72	HEXB_285-300	-0.0303	0.9338	0
LAMP1_138-146	HEXB_391-400	0.1394	0.7009	0
LAMP1_327-337	HEXB_391-400	0.2485	0.4888	0
LAMP1_357-363	HEXB_391-400	0.0909	0.8028	0
LAMP2_133-144	HEXB_391-400	0.4182	0.2291	0
LAMP2_145-152	HEXB_391-400	0.0303	0.9338	0
LAMP2_153-161	HEXB_391-400	-0.0909	0.8028	0
LAMP2_281-289	HEXB_391-400	0.1515	0.6761	0
LYZ_52-59	HEXB_391-400	0.1879	0.6032	0
LYZ_69-80	HEXB_391-400	0.3455	0.3282	0
FUCA1_114-130	HEXB_391-400	0.5758	0.0816	0
FUCA1_163-173	HEXB_391-400	0.5273	0.1173	0
FUCA1_344-354	HEXB_391-400	0.5758	0.0816	0
TCN2_300-313	HEXB_391-400	0.4303	0.2145	0
TCN2_393-399	HEXB_391-400	0.0909	0.8028	0
TCN2_45-59	HEXB_391-400	0.5152	0.1276	0
TPP1_246-259	HEXB_391-400	0.5636	0.0897	0
TPP1_507-520	HEXB_391-400	0.4909	0.1497	0
TPP1_61-78	HEXB_391-400	0.4061	0.2443	0
Ubiquitin_12-27	HEXB_391-400	0.0788	0.8287	0
Ubiquitin_64-72	HEXB_391-400	-0.0061	0.9867	0
LAMP2_133-144	LAMP1_138-146	0.4182	0.2291	0
LAMP2_153-161	LAMP1_138-146	0.7697	0.0092	0
LAMP2_281-289	LAMP1_138-146	0.3333	0.3466	0
LYZ_52-59	LAMP1_138-146	0.7818	0.0075	0
LYZ_69-80	LAMP1_138-146	0.7576	0.0111	0
FUCA1_114-130	LAMP1_138-146	-0.2	0.5796	0
FUCA1_163-173	LAMP1_138-146	-0.0788	0.8287	0
FUCA1_344-354	LAMP1_138-146	-0.1152	0.7514	0
TCN2_300-313	LAMP1_138-146	-0.2848	0.425	0
TCN2_393-399	LAMP1_138-146	-0.1758	0.6272	0
TCN2_45-59	LAMP1_138-146	-0.1879	0.6032	0
TPP1_246-259	LAMP1_138-146	0.0182	0.9602	0
TPP1_507-520	LAMP1_138-146	0.0061	0.9867	0
TPP1_61-78	LAMP1_138-146	-0.1394	0.7009	0
Ubiquitin_12-27	LAMP1_138-146	0.6121	0.06	0
Ubiquitin_64-72	LAMP1_138-146	0.6727	0.033	0
LAMP1_357-363	LAMP1_327-337	0.7818	0.0075	0
LAMP2_133-144	LAMP1_327-337	0.1879	0.6032	0
LAMP2_145-152	LAMP1_327-337	0.4909	0.1497	0
LAMP2_153-161	LAMP1_327-337	0.5636	0.0897	0
LAMP2_281-289	LAMP1_327-337	-0.0303	0.9338	0
LYZ_52-59	LAMP1_327-337	0.5273	0.1173	0
LYZ_69-80	LAMP1_327-337	0.4909	0.1497	0
FUCA1_114-130	LAMP1_327-337	-0.1758	0.6272	0
FUCA1_163-173	LAMP1_327-337	-0.0061	0.9867	0
FUCA1_344-354	LAMP1_327-337	-0.1758	0.6272	0
TCN2_300-313	LAMP1_327-337	-0.3697	0.2931	0
TCN2_393-399	LAMP1_327-337	-0.0909	0.8028	0
TCN2_45-59	LAMP1_327-337	-0.3212	0.3655	0
TPP1_246-259	LAMP1_327-337	0.1273	0.7261	0
TPP1_507-520	LAMP1_327-337	-0.1636	0.6515	0
TPP1_61-78	LAMP1_327-337	-0.1515	0.6761	0
Ubiquitin_12-27	LAMP1_327-337	0.5273	0.1173	0
Ubiquitin_64-72	LAMP1_327-337	0.5273	0.1173	0
LAMP2_133-144	LAMP1_357-363	0.4424	0.2004	0
LAMP2_281-289	LAMP1_357-363	0.4061	0.2443	0
LYZ_52-59	LAMP1_357-363	0.7455	0.0133	0
LYZ_69-80	LAMP1_357-363	0.7212	0.0186	0
FUCA1_114-130	LAMP1_357-363	-0.2	0.5796	0
FUCA1_163-173	LAMP1_357-363	-0.0667	0.8548	0
FUCA1_344-354	LAMP1_357-363	-0.1394	0.7009	0
TCN2_300-313	LAMP1_357-363	-0.3091	0.3848	0
TCN2_393-399	LAMP1_357-363	-0.2121	0.5563	0
TCN2_45-59	LAMP1_357-363	-0.2242	0.5334	0
TPP1_246-259	LAMP1_357-363	-0.103	0.777	0
TPP1_507-520	LAMP1_357-363	-0.0061	0.9867	0
TPP1_61-78	LAMP1_357-363	-0.1515	0.6761	0
Ubiquitin_12-27	LAMP1_357-363	0.6606	0.0376	0
Ubiquitin_64-72	LAMP1_357-363	0.697	0.0251	0
LAMP2_145-152	LAMP2_133-144	0.5879	0.0739	0
LAMP2_153-161	LAMP2_133-144	0.5152	0.1276	0
LYZ_52-59	LAMP2_133-144	0.2606	0.4671	0
LYZ_69-80	LAMP2_133-144	0.3333	0.3466	0
FUCA1_114-130	LAMP2_133-144	0.3939	0.26	0
FUCA1_163-173	LAMP2_133-144	0.3939	0.26	0
FUCA1_344-354	LAMP2_133-144	0.2606	0.4671	0
TCN2_300-313	LAMP2_133-144	0.1879	0.6032	0
TCN2_393-399	LAMP2_133-144	-0.2606	0.4671	0
TCN2_45-59	LAMP2_133-144	0.2485	0.4888	0
TPP1_246-259	LAMP2_133-144	0.2	0.5796	0
TPP1_507-520	LAMP2_133-144	0.2606	0.4671	0
TPP1_61-78	LAMP2_133-144	0.1394	0.7009	0
Ubiquitin_12-27	LAMP2_133-144	0.6121	0.06	0
Ubiquitin_64-72	LAMP2_133-144	0.6242	0.0537	0
LAMP2_281-289	LAMP2_145-152	0.6242	0.0537	0
LYZ_52-59	LAMP2_145-152	0.697	0.0251	0
LYZ_69-80	LAMP2_145-152	0.6848	0.0289	0
FUCA1_114-130	LAMP2_145-152	-0.0909	0.8028	0
FUCA1_163-173	LAMP2_145-152	0.0182	0.9602	0
FUCA1_344-354	LAMP2_145-152	0.0545	0.881	0
TCN2_300-313	LAMP2_145-152	-0.1152	0.7514	0
TCN2_393-399	LAMP2_145-152	-0.1515	0.6761	0
TCN2_45-59	LAMP2_145-152	-0.0545	0.881	0
TPP1_246-259	LAMP2_145-152	-0.1152	0.7514	0
TPP1_507-520	LAMP2_145-152	0.103	0.777	0
TPP1_61-78	LAMP2_145-152	-0.0303	0.9338	0
Ubiquitin_12-27	LAMP2_145-152	0.6	0.0667	0
Ubiquitin_64-72	LAMP2_145-152	0.6242	0.0537	0
LAMP2_281-289	LAMP2_153-161	0.4788	0.1615	0
LYZ_52-59	LAMP2_153-161	0.4061	0.2443	0
LYZ_69-80	LAMP2_153-161	0.3818	0.2763	0
FUCA1_114-130	LAMP2_153-161	-0.1152	0.7514	0
FUCA1_163-173	LAMP2_153-161	0.1152	0.7514	0
FUCA1_344-354	LAMP2_153-161	-0.0909	0.8028	0
TCN2_300-313	LAMP2_153-161	-0.2121	0.5563	0
TCN2_393-399	LAMP2_153-161	-0.3333	0.3466	0
TCN2_45-59	LAMP2_153-161	-0.2242	0.5334	0
TPP1_246-259	LAMP2_153-161	-0.3939	0.26	0
TPP1_507-520	LAMP2_153-161	-0.2727	0.4458	0
TPP1_61-78	LAMP2_153-161	-0.297	0.4047	0
LYZ_52-59	LAMP2_281-289	0.2606	0.4671	0
LYZ_69-80	LAMP2_281-289	0.3091	0.3848	0
FUCA1_114-130	LAMP2_281-289	0.2364	0.5109	0
FUCA1_163-173	LAMP2_281-289	0.1758	0.6272	0
FUCA1_344-354	LAMP2_281-289	0.1273	0.7261	0
TCN2_300-313	LAMP2_281-289	0.1636	0.6515	0
TCN2_393-399	LAMP2_281-289	-0.1879	0.6032	0
TCN2_45-59	LAMP2_281-289	0.2121	0.5563	0
TPP1_246-259	LAMP2_281-289	0.103	0.777	0
TPP1_507-520	LAMP2_281-289	0.3576	0.3104	0
TPP1_61-78	LAMP2_281-289	0.2121	0.5563	0
Ubiquitin_12-27	LAMP2_281-289	0.4545	0.1869	0
Ubiquitin_64-72	LAMP2_281-289	0.4909	0.1497	0
FUCA1_114-130	LYZ_52-59	-0.0667	0.8548	0
FUCA1_163-173	LYZ_52-59	-0.0788	0.8287	0
FUCA1_344-354	LYZ_52-59	0.1879	0.6032	0
TCN2_300-313	LYZ_52-59	-0.2	0.5796	0
TCN2_393-399	LYZ_52-59	-0.0182	0.9602	0
TCN2_45-59	LYZ_52-59	0.0061	0.9867	0
TPP1_246-259	LYZ_52-59	0.1636	0.6515	0
TPP1_507-520	LYZ_52-59	0.2242	0.5334	0
TPP1_61-78	LYZ_52-59	-0.0667	0.8548	0
Ubiquitin_12-27	LYZ_52-59	0.2242	0.5334	0
Ubiquitin_64-72	LYZ_52-59	0.3091	0.3848	0
FUCA1_114-130	LYZ_69-80	0.0909	0.8028	0
FUCA1_163-173	LYZ_69-80	0.0545	0.881	0
FUCA1_344-354	LYZ_69-80	0.3333	0.3466	0
TCN2_300-313	LYZ_69-80	-0.0061	0.9867	0
TCN2_393-399	LYZ_69-80	0.0667	0.8548	0
TCN2_45-59	LYZ_69-80	0.2	0.5796	0
TPP1_246-259	LYZ_69-80	0.2606	0.4671	0
TPP1_507-520	LYZ_69-80	0.3455	0.3282	0
TPP1_61-78	LYZ_69-80	0.0545	0.881	0
Ubiquitin_12-27	LYZ_69-80	0.2	0.5796	0
Ubiquitin_64-72	LYZ_69-80	0.2848	0.425	0
AP2B1_868-878	P-tau (ng/L)	0.7842	0.0072	0
APP_289-301	P-tau (ng/L)	0.541	0.1063	0
APP_439-450	P-tau (ng/L)	0.4985	0.1425	0
BSA_421-433	P-tau (ng/L)	-0.0365	0.9203	0
C9_146-154	P-tau (ng/L)	-0.231	0.5208	0
C9_186-194	P-tau (ng/L)	-0.2675	0.455	0
C9_232-242	P-tau (ng/L)	-0.2614	0.4657	0
C9_473-483	P-tau (ng/L)	-0.2736	0.4444	0
C9_497-508	P-tau (ng/L)	-0.2736	0.4444	0
CTSB_210-220	P-tau (ng/L)	0.0426	0.9071	0
CTSB_58-71	P-tau (ng/L)	-0.0608	0.8675	0
CTSB_80-87	P-tau (ng/L)	0.4255	0.2202	0
CTSD_112-122	P-tau (ng/L)	-0.3951	0.2584	0
CTSD_349-357	P-tau (ng/L)	-0.3465	0.3267	0
CTSD_55-72	P-tau (ng/L)	-0.0304	0.9336	0
CatF_103-116	P-tau (ng/L)	0.0608	0.8675	0
CatF_236-245	P-tau (ng/L)	0.1337	0.7126	0
CatF_266-278	P-tau (ng/L)	0.304	0.3932	0
CatF_442-450	P-tau (ng/L)	0.1824	0.6141	0
CTSL_105-116	P-tau (ng/L)	0.4802	0.1601	0
CTSZ_261-270	P-tau (ng/L)	0.0243	0.9468	0
CTSZ_39-47	P-tau (ng/L)	-0.0669	0.8544	0
DPP7_113-123	P-tau (ng/L)	0.1824	0.6141	0
DPP7_40-47	P-tau (ng/L)	-0.0608	0.8675	0
DPP7_449-462	P-tau (ng/L)	-0.3404	0.3358	0
GM2A_170-179	P-tau (ng/L)	0.3222	0.3639	0
GM2A_89-96	P-tau (ng/L)	0.4012	0.2505	0
HEXB_285-300	P-tau (ng/L)	-0.0426	0.9071	0
HEXB_391-400	P-tau (ng/L)	-0.079	0.8282	0
LAMP1_138-146	P-tau (ng/L)	0.4985	0.1425	0
LAMP1_327-337	P-tau (ng/L)	0.31	0.3833	0
LAMP1_357-363	P-tau (ng/L)	0.5897	0.0728	0
LAMP2_133-144	P-tau (ng/L)	0.6444	0.0443	0
LAMP2_145-152	P-tau (ng/L)	0.7052	0.0227	0
LAMP2_281-289	P-tau (ng/L)	0.6687	0.0345	0
LYZ_52-59	P-tau (ng/L)	0.0304	0.9336	0
LYZ_69-80	P-tau (ng/L)	0.0365	0.9203	0
FUCA1_114-130	P-tau (ng/L)	-0.1337	0.7126	0
FUCA1_163-173	P-tau (ng/L)	0.0182	0.9601	0
FUCA1_344-354	P-tau (ng/L)	-0.2553	0.4765	0
TCN2_300-313	P-tau (ng/L)	-0.0547	0.8807	0
TCN2_393-399	P-tau (ng/L)	-0.2796	0.4339	0
TCN2_45-59	P-tau (ng/L)	-0.1581	0.6628	0
TPP1_246-259	P-tau (ng/L)	-0.2553	0.4765	0
TPP1_507-520	P-tau (ng/L)	-0.0365	0.9203	0
TPP1_61-78	P-tau (ng/L)	0.0304	0.9336	0
Ubiquitin_12-27	P-tau (ng/L)	0.6991	0.0245	0
Ubiquitin_64-72	P-tau (ng/L)	0.6626	0.0368	0
TCN2_300-313	FUCA1_114-130	0.6848	0.0289	0
TCN2_393-399	FUCA1_114-130	0.3091	0.3848	0
TCN2_45-59	FUCA1_114-130	0.7576	0.0111	0
TPP1_246-259	FUCA1_114-130	0.3212	0.3655	0
TPP1_507-520	FUCA1_114-130	0.1394	0.7009	0
TPP1_61-78	FUCA1_114-130	0.1515	0.6761	0
Ubiquitin_12-27	FUCA1_114-130	0.0424	0.9074	0
Ubiquitin_64-72	FUCA1_114-130	0.0667	0.8548	0
TCN2_300-313	FUCA1_163-173	0.5273	0.1173	0
TCN2_393-399	FUCA1_163-173	0.1273	0.7261	0
TCN2_45-59	FUCA1_163-173	0.5758	0.0816	0
TPP1_246-259	FUCA1_163-173	0.0909	0.8028	0
TPP1_507-520	FUCA1_163-173	-0.1273	0.7261	0
TPP1_61-78	FUCA1_163-173	-0.0788	0.8287	0
Ubiquitin_12-27	FUCA1_163-173	0.297	0.4047	0
Ubiquitin_64-72	FUCA1_163-173	0.2848	0.425	0
TCN2_300-313	FUCA1_344-354	0.6848	0.0289	0
TCN2_393-399	FUCA1_344-354	0.3576	0.3104	0
TCN2_45-59	FUCA1_344-354	0.7939	0.0061	0
TPP1_246-259	FUCA1_344-354	0.3212	0.3655	0
TPP1_507-520	FUCA1_344-354	0.2242	0.5334	0
TPP1_61-78	FUCA1_344-354	0.1636	0.6515	0
Ubiquitin_12-27	FUCA1_344-354	-0.0788	0.8287	0
Ubiquitin_64-72	FUCA1_344-354	-0.0545	0.881	0
TCN2_393-399	TCN2_300-313	0.6364	0.0479	0
TPP1_246-259	TCN2_300-313	0.503	0.1383	0
TPP1_507-520	TCN2_300-313	0.5394	0.1076	0
TPP1_61-78	TCN2_300-313	0.6242	0.0537	0
Ubiquitin_12-27	TCN2_300-313	-0.3576	0.3104	0
Ubiquitin_64-72	TCN2_300-313	-0.297	0.4047	0
TPP1_246-259	TCN2_393-399	0.6364	0.0479	0
TPP1_507-520	TCN2_393-399	0.4909	0.1497	0
TPP1_61-78	TCN2_393-399	0.6848	0.0289	0
Ubiquitin_12-27	TCN2_393-399	-0.6727	0.033	0
Ubiquitin_64-72	TCN2_393-399	-0.5879	0.0739	0
TCN2_393-399	TCN2_45-59	0.6	0.0667	0
TPP1_246-259	TCN2_45-59	0.5515	0.0984	0
TPP1_507-520	TCN2_45-59	0.5758	0.0816	0
TPP1_61-78	TCN2_45-59	0.5636	0.0897	0
Ubiquitin_12-27	TCN2_45-59	-0.3333	0.3466	0
Ubiquitin_64-72	TCN2_45-59	-0.2485	0.4888	0
TPP1_507-520	TPP1_246-259	0.7333	0.0158	0
Ubiquitin_12-27	TPP1_246-259	-0.4667	0.1739	0
Ubiquitin_64-72	TPP1_246-259	-0.4061	0.2443	0
Ubiquitin_12-27	TPP1_507-520	-0.4788	0.1615	0
Ubiquitin_64-72	TPP1_507-520	-0.4667	0.1739	0
TPP1_246-259	TPP1_61-78	0.7697	0.0092	0
Ubiquitin_12-27	TPP1_61-78	-0.5515	0.0984	0
Ubiquitin_64-72	TPP1_61-78	-0.5636	0.0897	0
AP2B1_712-719	T-tau (ng/L)	0.7697	0.0092	0
AP2B1_835-842	T-tau (ng/L)	0.7576	0.0111	0
AP2B1_868-878	T-tau (ng/L)	0.7697	0.0092	0
APP_289-301	T-tau (ng/L)	0.2242	0.5334	0
APP_439-450	T-tau (ng/L)	0.2727	0.4458	0
BSA_421-433	T-tau (ng/L)	-0.1879	0.6032	0
C9_146-154	T-tau (ng/L)	-0.0667	0.8548	0
C9_186-194	T-tau (ng/L)	-0.1636	0.6515	0
C9_232-242	T-tau (ng/L)	-0.2121	0.5563	0
C9_473-483	T-tau (ng/L)	-0.3333	0.3466	0
C9_497-508	T-tau (ng/L)	-0.3333	0.3466	0
CTSB_210-220	T-tau (ng/L)	0.2121	0.5563	0
CTSB_58-71	T-tau (ng/L)	-0.1636	0.6515	0
CTSB_80-87	T-tau (ng/L)	0.2727	0.4458	0
CTSD_112-122	T-tau (ng/L)	-0.5152	0.1276	0
CTSD_349-357	T-tau (ng/L)	-0.1758	0.6272	0
CTSD_55-72	T-tau (ng/L)	-0.3091	0.3848	0
CatF_103-116	T-tau (ng/L)	-0.1394	0.7009	0
CatF_236-245	T-tau (ng/L)	0.1394	0.7009	0
CatF_266-278	T-tau (ng/L)	0.4909	0.1497	0
CatF_442-450	T-tau (ng/L)	0.3091	0.3848	0
CTSL_105-116	T-tau (ng/L)	0.2606	0.4671	0
CTSZ_261-270	T-tau (ng/L)	0.0424	0.9074	0
CTSZ_39-47	T-tau (ng/L)	-0.1758	0.6272	0
DPP7_113-123	T-tau (ng/L)	0.0909	0.8028	0
DPP7_40-47	T-tau (ng/L)	-0.0667	0.8548	0
DPP7_449-462	T-tau (ng/L)	-0.2121	0.5563	0
GM2A_170-179	T-tau (ng/L)	0.4424	0.2004	0
GM2A_89-96	T-tau (ng/L)	0.4788	0.1615	0
HEXB_285-300	T-tau (ng/L)	-0.1879	0.6032	0
HEXB_391-400	T-tau (ng/L)	-0.2727	0.4458	0
LAMP1_138-146	T-tau (ng/L)	0.2606	0.4671	0
LAMP1_327-337	T-tau (ng/L)	0.0667	0.8548	0
LAMP1_357-363	T-tau (ng/L)	0.3939	0.26	0
LAMP2_133-144	T-tau (ng/L)	0.3091	0.3848	0
LAMP2_145-152	T-tau (ng/L)	0.6	0.0667	0
LAMP2_153-161	T-tau (ng/L)	0.7697	0.0092	0
LAMP2_281-289	T-tau (ng/L)	0.3697	0.2931	0
LYZ_52-59	T-tau (ng/L)	-0.0061	0.9867	0
LYZ_69-80	T-tau (ng/L)	-0.0545	0.881	0
P-tau (ng/L)	T-tau (ng/L)	0.7538	0.0118	0
FUCA1_114-130	T-tau (ng/L)	-0.2121	0.5563	0
FUCA1_163-173	T-tau (ng/L)	0.0303	0.9338	0
FUCA1_344-354	T-tau (ng/L)	-0.1758	0.6272	0
TCN2_300-313	T-tau (ng/L)	-0.2848	0.425	0
TCN2_393-399	T-tau (ng/L)	-0.5273	0.1173	0
TCN2_45-59	T-tau (ng/L)	-0.3697	0.2931	0
TPP1_246-259	T-tau (ng/L)	-0.7212	0.0186	0
TPP1_507-520	T-tau (ng/L)	-0.3818	0.2763	0
TPP1_61-78	T-tau (ng/L)	-0.3697	0.2931	0
Ubiquitin_12-27	T-tau (ng/L)	0.6727	0.033	0
Ubiquitin_64-72	T-tau (ng/L)	0.5636	0.0897	0

## Sheet: Clincial Study I AD
Table S4. Spearman's correlation in the AD group of Clinical Study I (N = 6).
Variable	by Variable	Spearman ρ	Prob>|ρ|	Correlation (True = 1, False = 0)
AP2B1_835-842	AP2B1_712-719	0.9429	0.0048	1
AP2B1_868-878	AP2B1_712-719	0.9429	0.0048	1
CTSZ_39-47	AP2B1_712-719	0.9429	0.0048	1
GM2A_170-179	AP2B1_712-719	1	<.0001	1
GM2A_89-96	AP2B1_712-719	0.9429	0.0048	1
Ubiquitin_12-27	AP2B1_712-719	0.9429	0.0048	1
Ubiquitin_64-72	AP2B1_712-719	0.9429	0.0048	1
AP2B1_868-878	AP2B1_835-842	1	<.0001	1
GM2A_170-179	AP2B1_835-842	0.9429	0.0048	1
LAMP2_153-161	AP2B1_835-842	0.9429	0.0048	1
Ubiquitin_12-27	AP2B1_835-842	1	<.0001	1
Ubiquitin_64-72	AP2B1_835-842	1	<.0001	1
GM2A_170-179	AP2B1_868-878	0.9429	0.0048	1
LAMP2_153-161	AP2B1_868-878	0.9429	0.0048	1
Ubiquitin_12-27	AP2B1_868-878	1	<.0001	1
Ubiquitin_64-72	AP2B1_868-878	1	<.0001	1
C9_146-154	Aβ1-42 (ng/L)	0.9276	0.0077	1
C9_186-194	C9_146-154	0.9429	0.0048	1
C9_232-242	C9_146-154	0.9429	0.0048	1
C9_232-242	C9_186-194	1	<.0001	1
C9_473-483	C9_186-194	0.9429	0.0048	1
C9_497-508	C9_186-194	0.9429	0.0048	1
C9_473-483	C9_232-242	0.9429	0.0048	1
C9_497-508	C9_232-242	0.9429	0.0048	1
C9_497-508	C9_473-483	1	<.0001	1
CTSL_105-116	CTSB_210-220	0.9429	0.0048	1
LAMP1_327-337	CTSB_210-220	0.9429	0.0048	1
LAMP2_133-144	CTSB_210-220	0.9429	0.0048	1
LAMP2_145-152	CTSB_210-220	0.9429	0.0048	1
LAMP2_281-289	CTSB_210-220	0.9429	0.0048	1
TPP1_507-520	CTSB_210-220	0.9429	0.0048	1
CTSB_210-220	CTSB_58-71	1	<.0001	1
CTSB_80-87	CTSB_58-71	0.9429	0.0048	1
CTSL_105-116	CTSB_58-71	0.9429	0.0048	1
LAMP1_327-337	CTSB_58-71	0.9429	0.0048	1
LAMP2_133-144	CTSB_58-71	0.9429	0.0048	1
LAMP2_145-152	CTSB_58-71	0.9429	0.0048	1
LAMP2_281-289	CTSB_58-71	0.9429	0.0048	1
TPP1_507-520	CTSB_58-71	0.9429	0.0048	1
CTSB_210-220	CTSB_80-87	0.9429	0.0048	1
LAMP2_133-144	CTSB_80-87	1	<.0001	1
LAMP2_145-152	CTSB_80-87	1	<.0001	1
LAMP2_153-161	CTSB_80-87	0.9429	0.0048	1
LAMP2_281-289	CTSB_80-87	1	<.0001	1
CTSD_349-357	CTSD_112-122	0.9429	0.0048	1
FUCA1_114-130	CTSD_112-122	0.9429	0.0048	1
FUCA1_114-130	CTSD_349-357	1	<.0001	1
FUCA1_163-173	CTSD_349-357	0.9429	0.0048	1
FUCA1_344-354	CTSD_349-357	0.9429	0.0048	1
TPP1_61-78	CTSD_349-357	0.9429	0.0048	1
CTSD_112-122	CTSD_55-72	0.9429	0.0048	1
CTSD_349-357	CTSD_55-72	1	<.0001	1
FUCA1_114-130	CTSD_55-72	1	<.0001	1
FUCA1_163-173	CTSD_55-72	0.9429	0.0048	1
FUCA1_344-354	CTSD_55-72	0.9429	0.0048	1
TPP1_61-78	CTSD_55-72	0.9429	0.0048	1
CatF_236-245	CatF_103-116	0.9429	0.0048	1
CatF_266-278	CatF_103-116	0.9429	0.0048	1
CatF_442-450	CatF_103-116	0.9429	0.0048	1
CTSL_105-116	CatF_103-116	0.9429	0.0048	1
HEXB_391-400	CatF_103-116	1	<.0001	1
LAMP1_327-337	CatF_103-116	0.9429	0.0048	1
LAMP1_357-363	CatF_103-116	1	<.0001	1
TCN2_300-313	CatF_103-116	0.9429	0.0048	1
TCN2_45-59	CatF_103-116	0.9429	0.0048	1
TPP1_507-520	CatF_103-116	0.9429	0.0048	1
CatF_266-278	CatF_236-245	1	<.0001	1
CatF_442-450	CatF_236-245	1	<.0001	1
HEXB_391-400	CatF_236-245	0.9429	0.0048	1
LAMP1_357-363	CatF_236-245	0.9429	0.0048	1
TCN2_300-313	CatF_236-245	1	<.0001	1
TCN2_45-59	CatF_236-245	1	<.0001	1
CatF_442-450	CatF_266-278	1	<.0001	1
HEXB_391-400	CatF_266-278	0.9429	0.0048	1
LAMP1_357-363	CatF_266-278	0.9429	0.0048	1
TCN2_300-313	CatF_266-278	1	<.0001	1
TCN2_45-59	CatF_266-278	1	<.0001	1
HEXB_391-400	CatF_442-450	0.9429	0.0048	1
LAMP1_357-363	CatF_442-450	0.9429	0.0048	1
TCN2_300-313	CatF_442-450	1	<.0001	1
TCN2_45-59	CatF_442-450	1	<.0001	1
HEXB_285-300	CTSL_105-116	0.9429	0.0048	1
HEXB_391-400	CTSL_105-116	0.9429	0.0048	1
LAMP1_327-337	CTSL_105-116	1	<.0001	1
LAMP1_357-363	CTSL_105-116	0.9429	0.0048	1
FUCA1_163-173	CTSL_105-116	0.9429	0.0048	1
FUCA1_344-354	CTSL_105-116	0.9429	0.0048	1
TPP1_507-520	CTSL_105-116	1	<.0001	1
GM2A_170-179	CTSZ_39-47	0.9429	0.0048	1
LAMP2_153-161	CTSZ_39-47	0.9429	0.0048	1
TCN2_393-399	DPP7_113-123	-0.9429	0.0048	1
TPP1_61-78	DPP7_113-123	0.9429	0.0048	1
DPP7_449-462	DPP7_40-47	1	<.0001	1
Ubiquitin_12-27	GM2A_170-179	0.9429	0.0048	1
Ubiquitin_64-72	GM2A_170-179	0.9429	0.0048	1
GM2A_170-179	GM2A_89-96	0.9429	0.0048	1
LAMP1_327-337	HEXB_285-300	0.9429	0.0048	1
TPP1_246-259	HEXB_285-300	0.9429	0.0048	1
TPP1_507-520	HEXB_285-300	0.9429	0.0048	1
LAMP1_327-337	HEXB_391-400	0.9429	0.0048	1
LAMP1_357-363	HEXB_391-400	1	<.0001	1
TCN2_300-313	HEXB_391-400	0.9429	0.0048	1
TCN2_45-59	HEXB_391-400	0.9429	0.0048	1
TPP1_507-520	HEXB_391-400	0.9429	0.0048	1
LAMP2_153-161	LAMP1_138-146	0.9429	0.0048	1
LAMP1_357-363	LAMP1_327-337	0.9429	0.0048	1
FUCA1_163-173	LAMP1_327-337	0.9429	0.0048	1
FUCA1_344-354	LAMP1_327-337	0.9429	0.0048	1
TPP1_507-520	LAMP1_327-337	1	<.0001	1
TCN2_300-313	LAMP1_357-363	0.9429	0.0048	1
TCN2_45-59	LAMP1_357-363	0.9429	0.0048	1
TPP1_507-520	LAMP1_357-363	0.9429	0.0048	1
LAMP2_145-152	LAMP2_133-144	1	<.0001	1
LAMP2_153-161	LAMP2_133-144	0.9429	0.0048	1
LAMP2_281-289	LAMP2_133-144	1	<.0001	1
LAMP2_153-161	LAMP2_145-152	0.9429	0.0048	1
LAMP2_281-289	LAMP2_145-152	1	<.0001	1
LAMP2_281-289	LAMP2_153-161	0.9429	0.0048	1
Ubiquitin_12-27	LAMP2_153-161	0.9429	0.0048	1
Ubiquitin_64-72	LAMP2_153-161	0.9429	0.0048	1
LYZ_69-80	LYZ_52-59	0.9429	0.0048	1
APP_289-301	P-tau (ng/L)	1	<.0001	1
FUCA1_163-173	FUCA1_114-130	0.9429	0.0048	1
FUCA1_344-354	FUCA1_114-130	0.9429	0.0048	1
TPP1_61-78	FUCA1_114-130	0.9429	0.0048	1
FUCA1_344-354	FUCA1_163-173	1	<.0001	1
TPP1_246-259	FUCA1_163-173	0.9429	0.0048	1
TPP1_507-520	FUCA1_163-173	0.9429	0.0048	1
TPP1_246-259	FUCA1_344-354	0.9429	0.0048	1
TPP1_507-520	FUCA1_344-354	0.9429	0.0048	1
TCN2_300-313	TCN2_45-59	1	<.0001	1
Ubiquitin_64-72	Ubiquitin_12-27	1	<.0001	1
AP2B1_712-719	Age	0.0857	0.8717	0
AP2B1_835-842	Age	0.0286	0.9572	0
AP2B1_868-878	Age	0.0286	0.9572	0
APP_289-301	Age	-0.4286	0.3965	0
APP_439-450	Age	0.3143	0.5441	0
Aβ1-42 (ng/L)	Age	0.8117	0.0499	0
BSA_421-433	Age	-0.2571	0.6228	0
C9_146-154	Age	0.8857	0.0188	0
C9_186-194	Age	0.7714	0.0724	0
C9_232-242	Age	0.7714	0.0724	0
C9_473-483	Age	0.6571	0.1562	0
C9_497-508	Age	0.6571	0.1562	0
CTSB_210-220	Age	-0.1429	0.7872	0
CTSB_58-71	Age	-0.1429	0.7872	0
CTSB_80-87	Age	-0.0857	0.8717	0
CTSD_112-122	Age	-0.2571	0.6228	0
CTSD_349-357	Age	-0.0286	0.9572	0
CTSD_55-72	Age	-0.0286	0.9572	0
CatF_103-116	Age	0.1429	0.7872	0
CatF_236-245	Age	0.4286	0.3965	0
CatF_266-278	Age	0.4286	0.3965	0
CatF_442-450	Age	0.4286	0.3965	0
CTSL_105-116	Age	0.0857	0.8717	0
CTSZ_261-270	Age	-0.3143	0.5441	0
CTSZ_39-47	Age	0.2571	0.6228	0
DPP7_113-123	Age	-0.0286	0.9572	0
DPP7_40-47	Age	0.3143	0.5441	0
DPP7_449-462	Age	0.3143	0.5441	0
GM2A_170-179	Age	0.0857	0.8717	0
GM2A_89-96	Age	0.2571	0.6228	0
HEXB_285-300	Age	-0.1429	0.7872	0
HEXB_391-400	Age	0.1429	0.7872	0
LAMP1_138-146	Age	0.4286	0.3965	0
LAMP1_327-337	Age	0.0857	0.8717	0
LAMP1_357-363	Age	0.1429	0.7872	0
LAMP2_133-144	Age	-0.0857	0.8717	0
LAMP2_145-152	Age	-0.0857	0.8717	0
LAMP2_153-161	Age	0.2	0.704	0
LAMP2_281-289	Age	-0.0857	0.8717	0
LYZ_52-59	Age	0.1429	0.7872	0
LYZ_69-80	Age	0.0857	0.8717	0
P-tau (ng/L)	Age	-0.4286	0.3965	0
FUCA1_114-130	Age	-0.0286	0.9572	0
FUCA1_163-173	Age	0.1429	0.7872	0
FUCA1_344-354	Age	0.1429	0.7872	0
TCN2_300-313	Age	0.4286	0.3965	0
TCN2_393-399	Age	0.2571	0.6228	0
TCN2_45-59	Age	0.4286	0.3965	0
TPP1_246-259	Age	-0.0857	0.8717	0
TPP1_507-520	Age	0.0857	0.8717	0
TPP1_61-78	Age	0.0857	0.8717	0
T-tau (ng/L)	Age	-0.3143	0.5441	0
Ubiquitin_12-27	Age	0.0286	0.9572	0
Ubiquitin_64-72	Age	0.0286	0.9572	0
APP_289-301	AP2B1_712-719	0.7143	0.1108	0
APP_439-450	AP2B1_712-719	0.5429	0.2657	0
BSA_421-433	AP2B1_712-719	0.4286	0.3965	0
C9_146-154	AP2B1_712-719	0.4286	0.3965	0
C9_186-194	AP2B1_712-719	0.3143	0.5441	0
C9_232-242	AP2B1_712-719	0.3143	0.5441	0
C9_473-483	AP2B1_712-719	0.4286	0.3965	0
C9_497-508	AP2B1_712-719	0.4286	0.3965	0
CTSB_210-220	AP2B1_712-719	0.6571	0.1562	0
CTSB_58-71	AP2B1_712-719	0.6571	0.1562	0
CTSB_80-87	AP2B1_712-719	0.8286	0.0416	0
CTSD_112-122	AP2B1_712-719	0.2	0.704	0
CTSD_349-357	AP2B1_712-719	0.0857	0.8717	0
CTSD_55-72	AP2B1_712-719	0.0857	0.8717	0
CatF_103-116	AP2B1_712-719	0.6	0.208	0
CatF_236-245	AP2B1_712-719	0.6571	0.1562	0
CatF_266-278	AP2B1_712-719	0.6571	0.1562	0
CatF_442-450	AP2B1_712-719	0.6571	0.1562	0
CTSL_105-116	AP2B1_712-719	0.5429	0.2657	0
CTSZ_261-270	AP2B1_712-719	0.6	0.208	0
DPP7_113-123	AP2B1_712-719	-0.2571	0.6228	0
DPP7_40-47	AP2B1_712-719	0.0857	0.8717	0
DPP7_449-462	AP2B1_712-719	0.0857	0.8717	0
HEXB_285-300	AP2B1_712-719	0.4286	0.3965	0
HEXB_391-400	AP2B1_712-719	0.6	0.208	0
LAMP1_138-146	AP2B1_712-719	0.7714	0.0724	0
LAMP1_327-337	AP2B1_712-719	0.5429	0.2657	0
LAMP1_357-363	AP2B1_712-719	0.6	0.208	0
LAMP2_133-144	AP2B1_712-719	0.8286	0.0416	0
LAMP2_145-152	AP2B1_712-719	0.8286	0.0416	0
LAMP2_153-161	AP2B1_712-719	0.8857	0.0188	0
LAMP2_281-289	AP2B1_712-719	0.8286	0.0416	0
LYZ_52-59	AP2B1_712-719	0.4857	0.3287	0
LYZ_69-80	AP2B1_712-719	0.3143	0.5441	0
FUCA1_114-130	AP2B1_712-719	0.0857	0.8717	0
FUCA1_163-173	AP2B1_712-719	0.2571	0.6228	0
FUCA1_344-354	AP2B1_712-719	0.2571	0.6228	0
TCN2_300-313	AP2B1_712-719	0.6571	0.1562	0
TCN2_393-399	AP2B1_712-719	0.1429	0.7872	0
TCN2_45-59	AP2B1_712-719	0.6571	0.1562	0
TPP1_246-259	AP2B1_712-719	0.1429	0.7872	0
TPP1_507-520	AP2B1_712-719	0.5429	0.2657	0
TPP1_61-78	AP2B1_712-719	-0.1429	0.7872	0
APP_289-301	AP2B1_835-842	0.8286	0.0416	0
APP_439-450	AP2B1_835-842	0.6571	0.1562	0
BSA_421-433	AP2B1_835-842	0.4857	0.3287	0
C9_146-154	AP2B1_835-842	0.3143	0.5441	0
C9_186-194	AP2B1_835-842	0.1429	0.7872	0
C9_232-242	AP2B1_835-842	0.1429	0.7872	0
C9_473-483	AP2B1_835-842	0.2	0.704	0
C9_497-508	AP2B1_835-842	0.2	0.704	0
CTSB_210-220	AP2B1_835-842	0.7143	0.1108	0
CTSB_58-71	AP2B1_835-842	0.7143	0.1108	0
CTSB_80-87	AP2B1_835-842	0.8857	0.0188	0
CTSD_112-122	AP2B1_835-842	0.3714	0.4685	0
CTSD_349-357	AP2B1_835-842	0.2571	0.6228	0
CTSD_55-72	AP2B1_835-842	0.2571	0.6228	0
CatF_103-116	AP2B1_835-842	0.5429	0.2657	0
CatF_236-245	AP2B1_835-842	0.6	0.208	0
CatF_266-278	AP2B1_835-842	0.6	0.208	0
CatF_442-450	AP2B1_835-842	0.6	0.208	0
CTSL_105-116	AP2B1_835-842	0.6	0.208	0
CTSZ_261-270	AP2B1_835-842	0.5429	0.2657	0
CTSZ_39-47	AP2B1_835-842	0.8857	0.0188	0
DPP7_113-123	AP2B1_835-842	-0.2	0.704	0
DPP7_40-47	AP2B1_835-842	0.0286	0.9572	0
DPP7_449-462	AP2B1_835-842	0.0286	0.9572	0
GM2A_89-96	AP2B1_835-842	0.8286	0.0416	0
HEXB_285-300	AP2B1_835-842	0.4857	0.3287	0
HEXB_391-400	AP2B1_835-842	0.5429	0.2657	0
LAMP1_138-146	AP2B1_835-842	0.8286	0.0416	0
LAMP1_327-337	AP2B1_835-842	0.6	0.208	0
LAMP1_357-363	AP2B1_835-842	0.5429	0.2657	0
LAMP2_133-144	AP2B1_835-842	0.8857	0.0188	0
LAMP2_145-152	AP2B1_835-842	0.8857	0.0188	0
LAMP2_281-289	AP2B1_835-842	0.8857	0.0188	0
LYZ_52-59	AP2B1_835-842	0.2571	0.6228	0
LYZ_69-80	AP2B1_835-842	0.0857	0.8717	0
FUCA1_114-130	AP2B1_835-842	0.2571	0.6228	0
FUCA1_163-173	AP2B1_835-842	0.3714	0.4685	0
FUCA1_344-354	AP2B1_835-842	0.3714	0.4685	0
TCN2_300-313	AP2B1_835-842	0.6	0.208	0
TCN2_393-399	AP2B1_835-842	0.0857	0.8717	0
TCN2_45-59	AP2B1_835-842	0.6	0.208	0
TPP1_246-259	AP2B1_835-842	0.2571	0.6228	0
TPP1_507-520	AP2B1_835-842	0.6	0.208	0
TPP1_61-78	AP2B1_835-842	-0.0286	0.9572	0
APP_289-301	AP2B1_868-878	0.8286	0.0416	0
APP_439-450	AP2B1_868-878	0.6571	0.1562	0
BSA_421-433	AP2B1_868-878	0.4857	0.3287	0
C9_146-154	AP2B1_868-878	0.3143	0.5441	0
C9_186-194	AP2B1_868-878	0.1429	0.7872	0
C9_232-242	AP2B1_868-878	0.1429	0.7872	0
C9_473-483	AP2B1_868-878	0.2	0.704	0
C9_497-508	AP2B1_868-878	0.2	0.704	0
CTSB_210-220	AP2B1_868-878	0.7143	0.1108	0
CTSB_58-71	AP2B1_868-878	0.7143	0.1108	0
CTSB_80-87	AP2B1_868-878	0.8857	0.0188	0
CTSD_112-122	AP2B1_868-878	0.3714	0.4685	0
CTSD_349-357	AP2B1_868-878	0.2571	0.6228	0
CTSD_55-72	AP2B1_868-878	0.2571	0.6228	0
CatF_103-116	AP2B1_868-878	0.5429	0.2657	0
CatF_236-245	AP2B1_868-878	0.6	0.208	0
CatF_266-278	AP2B1_868-878	0.6	0.208	0
CatF_442-450	AP2B1_868-878	0.6	0.208	0
CTSL_105-116	AP2B1_868-878	0.6	0.208	0
CTSZ_261-270	AP2B1_868-878	0.5429	0.2657	0
CTSZ_39-47	AP2B1_868-878	0.8857	0.0188	0
DPP7_113-123	AP2B1_868-878	-0.2	0.704	0
DPP7_40-47	AP2B1_868-878	0.0286	0.9572	0
DPP7_449-462	AP2B1_868-878	0.0286	0.9572	0
GM2A_89-96	AP2B1_868-878	0.8286	0.0416	0
HEXB_285-300	AP2B1_868-878	0.4857	0.3287	0
HEXB_391-400	AP2B1_868-878	0.5429	0.2657	0
LAMP1_138-146	AP2B1_868-878	0.8286	0.0416	0
LAMP1_327-337	AP2B1_868-878	0.6	0.208	0
LAMP1_357-363	AP2B1_868-878	0.5429	0.2657	0
LAMP2_133-144	AP2B1_868-878	0.8857	0.0188	0
LAMP2_145-152	AP2B1_868-878	0.8857	0.0188	0
LAMP2_281-289	AP2B1_868-878	0.8857	0.0188	0
LYZ_52-59	AP2B1_868-878	0.2571	0.6228	0
LYZ_69-80	AP2B1_868-878	0.0857	0.8717	0
FUCA1_114-130	AP2B1_868-878	0.2571	0.6228	0
FUCA1_163-173	AP2B1_868-878	0.3714	0.4685	0
FUCA1_344-354	AP2B1_868-878	0.3714	0.4685	0
TCN2_300-313	AP2B1_868-878	0.6	0.208	0
TCN2_393-399	AP2B1_868-878	0.0857	0.8717	0
TCN2_45-59	AP2B1_868-878	0.6	0.208	0
TPP1_246-259	AP2B1_868-878	0.2571	0.6228	0
TPP1_507-520	AP2B1_868-878	0.6	0.208	0
TPP1_61-78	AP2B1_868-878	-0.0286	0.9572	0
APP_439-450	APP_289-301	0.6	0.208	0
BSA_421-433	APP_289-301	0.3714	0.4685	0
C9_146-154	APP_289-301	-0.0857	0.8717	0
C9_186-194	APP_289-301	-0.1429	0.7872	0
C9_232-242	APP_289-301	-0.1429	0.7872	0
C9_473-483	APP_289-301	-0.0857	0.8717	0
C9_497-508	APP_289-301	-0.0857	0.8717	0
CTSB_210-220	APP_289-301	0.7714	0.0724	0
CTSB_58-71	APP_289-301	0.7714	0.0724	0
CTSB_80-87	APP_289-301	0.8857	0.0188	0
CTSD_112-122	APP_289-301	0.6571	0.1562	0
CTSD_349-357	APP_289-301	0.4286	0.3965	0
CTSD_55-72	APP_289-301	0.4286	0.3965	0
CatF_103-116	APP_289-301	0.4286	0.3965	0
CatF_236-245	APP_289-301	0.3143	0.5441	0
CatF_266-278	APP_289-301	0.3143	0.5441	0
CatF_442-450	APP_289-301	0.3143	0.5441	0
CTSL_105-116	APP_289-301	0.5429	0.2657	0
CTSZ_261-270	APP_289-301	0.6	0.208	0
CTSZ_39-47	APP_289-301	0.6571	0.1562	0
DPP7_113-123	APP_289-301	0.0857	0.8717	0
DPP7_40-47	APP_289-301	-0.0286	0.9572	0
DPP7_449-462	APP_289-301	-0.0286	0.9572	0
GM2A_170-179	APP_289-301	0.7143	0.1108	0
GM2A_89-96	APP_289-301	0.5429	0.2657	0
HEXB_285-300	APP_289-301	0.4857	0.3287	0
HEXB_391-400	APP_289-301	0.4286	0.3965	0
LAMP1_138-146	APP_289-301	0.5429	0.2657	0
LAMP1_327-337	APP_289-301	0.5429	0.2657	0
LAMP1_357-363	APP_289-301	0.4286	0.3965	0
LAMP2_133-144	APP_289-301	0.8857	0.0188	0
LAMP2_145-152	APP_289-301	0.8857	0.0188	0
LAMP2_153-161	APP_289-301	0.7714	0.0724	0
LAMP2_281-289	APP_289-301	0.8857	0.0188	0
LYZ_52-59	APP_289-301	0.2571	0.6228	0
LYZ_69-80	APP_289-301	0.1429	0.7872	0
FUCA1_114-130	APP_289-301	0.4286	0.3965	0
FUCA1_163-173	APP_289-301	0.3714	0.4685	0
FUCA1_344-354	APP_289-301	0.3714	0.4685	0
TCN2_300-313	APP_289-301	0.3143	0.5441	0
TCN2_393-399	APP_289-301	-0.3143	0.5441	0
TCN2_45-59	APP_289-301	0.3143	0.5441	0
TPP1_246-259	APP_289-301	0.3143	0.5441	0
TPP1_507-520	APP_289-301	0.5429	0.2657	0
TPP1_61-78	APP_289-301	0.1429	0.7872	0
Ubiquitin_12-27	APP_289-301	0.8286	0.0416	0
Ubiquitin_64-72	APP_289-301	0.8286	0.0416	0
BSA_421-433	APP_439-450	-0.2571	0.6228	0
C9_146-154	APP_439-450	0.5429	0.2657	0
C9_186-194	APP_439-450	0.4857	0.3287	0
C9_232-242	APP_439-450	0.4857	0.3287	0
C9_473-483	APP_439-450	0.3143	0.5441	0
C9_497-508	APP_439-450	0.3143	0.5441	0
CTSB_210-220	APP_439-450	0.3714	0.4685	0
CTSB_58-71	APP_439-450	0.3714	0.4685	0
CTSB_80-87	APP_439-450	0.6	0.208	0
CTSD_112-122	APP_439-450	0.3714	0.4685	0
CTSD_349-357	APP_439-450	0.2571	0.6228	0
CTSD_55-72	APP_439-450	0.2571	0.6228	0
CatF_103-116	APP_439-450	0.1429	0.7872	0
CatF_236-245	APP_439-450	0.2571	0.6228	0
CatF_266-278	APP_439-450	0.2571	0.6228	0
CatF_442-450	APP_439-450	0.2571	0.6228	0
CTSL_105-116	APP_439-450	0.2571	0.6228	0
CTSZ_261-270	APP_439-450	-0.0286	0.9572	0
CTSZ_39-47	APP_439-450	0.6	0.208	0
DPP7_113-123	APP_439-450	0.0286	0.9572	0
DPP7_40-47	APP_439-450	-0.0857	0.8717	0
DPP7_449-462	APP_439-450	-0.0857	0.8717	0
GM2A_170-179	APP_439-450	0.5429	0.2657	0
GM2A_89-96	APP_439-450	0.6	0.208	0
HEXB_285-300	APP_439-450	-0.0286	0.9572	0
HEXB_391-400	APP_439-450	0.1429	0.7872	0
LAMP1_138-146	APP_439-450	0.6	0.208	0
LAMP1_327-337	APP_439-450	0.2571	0.6228	0
LAMP1_357-363	APP_439-450	0.1429	0.7872	0
LAMP2_133-144	APP_439-450	0.6	0.208	0
LAMP2_145-152	APP_439-450	0.6	0.208	0
LAMP2_153-161	APP_439-450	0.7143	0.1108	0
LAMP2_281-289	APP_439-450	0.6	0.208	0
LYZ_52-59	APP_439-450	0.3143	0.5441	0
LYZ_69-80	APP_439-450	0.0857	0.8717	0
FUCA1_114-130	APP_439-450	0.2571	0.6228	0
FUCA1_163-173	APP_439-450	0.2	0.704	0
FUCA1_344-354	APP_439-450	0.2	0.704	0
TCN2_300-313	APP_439-450	0.2571	0.6228	0
TCN2_393-399	APP_439-450	-0.1429	0.7872	0
TCN2_45-59	APP_439-450	0.2571	0.6228	0
TPP1_246-259	APP_439-450	-0.0857	0.8717	0
TPP1_507-520	APP_439-450	0.2571	0.6228	0
TPP1_61-78	APP_439-450	0.0857	0.8717	0
Ubiquitin_12-27	APP_439-450	0.6571	0.1562	0
Ubiquitin_64-72	APP_439-450	0.6571	0.1562	0
AP2B1_712-719	Aβ1-42 (ng/L)	0.5218	0.2883	0
AP2B1_835-842	Aβ1-42 (ng/L)	0.3479	0.4993	0
AP2B1_868-878	Aβ1-42 (ng/L)	0.3479	0.4993	0
APP_289-301	Aβ1-42 (ng/L)	-0.116	0.8268	0
APP_439-450	Aβ1-42 (ng/L)	0.2899	0.5774	0
BSA_421-433	Aβ1-42 (ng/L)	0.029	0.9565	0
C9_186-194	Aβ1-42 (ng/L)	0.8407	0.0361	0
C9_232-242	Aβ1-42 (ng/L)	0.8407	0.0361	0
C9_473-483	Aβ1-42 (ng/L)	0.8986	0.0149	0
C9_497-508	Aβ1-42 (ng/L)	0.8986	0.0149	0
CTSB_210-220	Aβ1-42 (ng/L)	0.2319	0.6584	0
CTSB_58-71	Aβ1-42 (ng/L)	0.2319	0.6584	0
CTSB_80-87	Aβ1-42 (ng/L)	0.2899	0.5774	0
CTSD_112-122	Aβ1-42 (ng/L)	-0.1449	0.7841	0
CTSD_349-357	Aβ1-42 (ng/L)	0	1	0
CTSD_55-72	Aβ1-42 (ng/L)	0	1	0
CatF_103-116	Aβ1-42 (ng/L)	0.5508	0.2574	0
CatF_236-245	Aβ1-42 (ng/L)	0.7537	0.0835	0
CatF_266-278	Aβ1-42 (ng/L)	0.7537	0.0835	0
CatF_442-450	Aβ1-42 (ng/L)	0.7537	0.0835	0
CTSL_105-116	Aβ1-42 (ng/L)	0.3769	0.4615	0
CTSZ_261-270	Aβ1-42 (ng/L)	0.2029	0.6998	0
CTSZ_39-47	Aβ1-42 (ng/L)	0.6667	0.1481	0
DPP7_113-123	Aβ1-42 (ng/L)	-0.029	0.9565	0
DPP7_40-47	Aβ1-42 (ng/L)	0.4928	0.3206	0
DPP7_449-462	Aβ1-42 (ng/L)	0.4928	0.3206	0
GM2A_170-179	Aβ1-42 (ng/L)	0.5218	0.2883	0
GM2A_89-96	Aβ1-42 (ng/L)	0.6377	0.1731	0
HEXB_285-300	Aβ1-42 (ng/L)	0.1739	0.7417	0
HEXB_391-400	Aβ1-42 (ng/L)	0.5508	0.2574	0
LAMP1_138-146	Aβ1-42 (ng/L)	0.6377	0.1731	0
LAMP1_327-337	Aβ1-42 (ng/L)	0.3769	0.4615	0
LAMP1_357-363	Aβ1-42 (ng/L)	0.5508	0.2574	0
LAMP2_133-144	Aβ1-42 (ng/L)	0.2899	0.5774	0
LAMP2_145-152	Aβ1-42 (ng/L)	0.2899	0.5774	0
LAMP2_153-161	Aβ1-42 (ng/L)	0.4928	0.3206	0
LAMP2_281-289	Aβ1-42 (ng/L)	0.2899	0.5774	0
LYZ_52-59	Aβ1-42 (ng/L)	0.5508	0.2574	0
LYZ_69-80	Aβ1-42 (ng/L)	0.4928	0.3206	0
P-tau (ng/L)	Aβ1-42 (ng/L)	-0.116	0.8268	0
FUCA1_114-130	Aβ1-42 (ng/L)	0	1	0
FUCA1_163-173	Aβ1-42 (ng/L)	0.2609	0.6175	0
FUCA1_344-354	Aβ1-42 (ng/L)	0.2609	0.6175	0
TCN2_300-313	Aβ1-42 (ng/L)	0.7537	0.0835	0
TCN2_393-399	Aβ1-42 (ng/L)	0.1739	0.7417	0
TCN2_45-59	Aβ1-42 (ng/L)	0.7537	0.0835	0
TPP1_246-259	Aβ1-42 (ng/L)	0.058	0.9131	0
TPP1_507-520	Aβ1-42 (ng/L)	0.3769	0.4615	0
TPP1_61-78	Aβ1-42 (ng/L)	0.058	0.9131	0
T-tau (ng/L)	Aβ1-42 (ng/L)	0.116	0.8268	0
Ubiquitin_12-27	Aβ1-42 (ng/L)	0.3479	0.4993	0
Ubiquitin_64-72	Aβ1-42 (ng/L)	0.3479	0.4993	0
C9_146-154	BSA_421-433	-0.2571	0.6228	0
C9_186-194	BSA_421-433	-0.4857	0.3287	0
C9_232-242	BSA_421-433	-0.4857	0.3287	0
C9_473-483	BSA_421-433	-0.2571	0.6228	0
C9_497-508	BSA_421-433	-0.2571	0.6228	0
CTSB_210-220	BSA_421-433	0.6	0.208	0
CTSB_58-71	BSA_421-433	0.6	0.208	0
CTSB_80-87	BSA_421-433	0.4857	0.3287	0
CTSD_112-122	BSA_421-433	0.3143	0.5441	0
CTSD_349-357	BSA_421-433	0.3714	0.4685	0
CTSD_55-72	BSA_421-433	0.3714	0.4685	0
CatF_103-116	BSA_421-433	0.6	0.208	0
CatF_236-245	BSA_421-433	0.5429	0.2657	0
CatF_266-278	BSA_421-433	0.5429	0.2657	0
CatF_442-450	BSA_421-433	0.5429	0.2657	0
CTSL_105-116	BSA_421-433	0.6571	0.1562	0
CTSZ_261-270	BSA_421-433	0.7143	0.1108	0
CTSZ_39-47	BSA_421-433	0.3714	0.4685	0
DPP7_113-123	BSA_421-433	-0.0286	0.9572	0
DPP7_40-47	BSA_421-433	0.3143	0.5441	0
DPP7_449-462	BSA_421-433	0.3143	0.5441	0
GM2A_170-179	BSA_421-433	0.4286	0.3965	0
GM2A_89-96	BSA_421-433	0.1429	0.7872	0
HEXB_285-300	BSA_421-433	0.8286	0.0416	0
HEXB_391-400	BSA_421-433	0.6	0.208	0
LAMP1_138-146	BSA_421-433	0.4857	0.3287	0
LAMP1_327-337	BSA_421-433	0.6571	0.1562	0
LAMP1_357-363	BSA_421-433	0.6	0.208	0
LAMP2_133-144	BSA_421-433	0.4857	0.3287	0
LAMP2_145-152	BSA_421-433	0.4857	0.3287	0
LAMP2_153-161	BSA_421-433	0.4286	0.3965	0
LAMP2_281-289	BSA_421-433	0.4857	0.3287	0
LYZ_52-59	BSA_421-433	-0.2571	0.6228	0
LYZ_69-80	BSA_421-433	-0.1429	0.7872	0
FUCA1_114-130	BSA_421-433	0.3714	0.4685	0
FUCA1_163-173	BSA_421-433	0.5429	0.2657	0
FUCA1_344-354	BSA_421-433	0.5429	0.2657	0
TCN2_300-313	BSA_421-433	0.5429	0.2657	0
TCN2_393-399	BSA_421-433	0.0857	0.8717	0
TCN2_45-59	BSA_421-433	0.5429	0.2657	0
TPP1_246-259	BSA_421-433	0.7143	0.1108	0
TPP1_507-520	BSA_421-433	0.6571	0.1562	0
TPP1_61-78	BSA_421-433	0.2	0.704	0
Ubiquitin_12-27	BSA_421-433	0.4857	0.3287	0
Ubiquitin_64-72	BSA_421-433	0.4857	0.3287	0
C9_473-483	C9_146-154	0.8857	0.0188	0
C9_497-508	C9_146-154	0.8857	0.0188	0
CTSB_210-220	C9_146-154	0.1429	0.7872	0
CTSB_58-71	C9_146-154	0.1429	0.7872	0
CTSB_80-87	C9_146-154	0.2571	0.6228	0
CTSD_112-122	C9_146-154	-0.0857	0.8717	0
CTSD_349-357	C9_146-154	0.0286	0.9572	0
CTSD_55-72	C9_146-154	0.0286	0.9572	0
CatF_103-116	C9_146-154	0.3714	0.4685	0
CatF_236-245	C9_146-154	0.6	0.208	0
CatF_266-278	C9_146-154	0.6	0.208	0
CatF_442-450	C9_146-154	0.6	0.208	0
CTSL_105-116	C9_146-154	0.2571	0.6228	0
CTSZ_261-270	C9_146-154	-0.0286	0.9572	0
CTSZ_39-47	C9_146-154	0.6	0.208	0
DPP7_113-123	C9_146-154	0.0286	0.9572	0
DPP7_40-47	C9_146-154	0.3714	0.4685	0
DPP7_449-462	C9_146-154	0.3714	0.4685	0
GM2A_170-179	C9_146-154	0.4286	0.3965	0
GM2A_89-96	C9_146-154	0.6	0.208	0
HEXB_285-300	C9_146-154	-0.0286	0.9572	0
HEXB_391-400	C9_146-154	0.3714	0.4685	0
LAMP1_138-146	C9_146-154	0.6	0.208	0
LAMP1_327-337	C9_146-154	0.2571	0.6228	0
LAMP1_357-363	C9_146-154	0.3714	0.4685	0
LAMP2_133-144	C9_146-154	0.2571	0.6228	0
LAMP2_145-152	C9_146-154	0.2571	0.6228	0
LAMP2_153-161	C9_146-154	0.4857	0.3287	0
LAMP2_281-289	C9_146-154	0.2571	0.6228	0
LYZ_52-59	C9_146-154	0.5429	0.2657	0
LYZ_69-80	C9_146-154	0.4286	0.3965	0
FUCA1_114-130	C9_146-154	0.0286	0.9572	0
FUCA1_163-173	C9_146-154	0.2	0.704	0
FUCA1_344-354	C9_146-154	0.2	0.704	0
TCN2_300-313	C9_146-154	0.6	0.208	0
TCN2_393-399	C9_146-154	0.0857	0.8717	0
TCN2_45-59	C9_146-154	0.6	0.208	0
TPP1_246-259	C9_146-154	-0.0857	0.8717	0
TPP1_507-520	C9_146-154	0.2571	0.6228	0
TPP1_61-78	C9_146-154	0.0857	0.8717	0
Ubiquitin_12-27	C9_146-154	0.3143	0.5441	0
Ubiquitin_64-72	C9_146-154	0.3143	0.5441	0
CTSB_210-220	C9_186-194	0.0286	0.9572	0
CTSB_58-71	C9_186-194	0.0286	0.9572	0
CTSB_80-87	C9_186-194	0.1429	0.7872	0
CTSD_112-122	C9_186-194	-0.1429	0.7872	0
CTSD_349-357	C9_186-194	-0.0857	0.8717	0
CTSD_55-72	C9_186-194	-0.0857	0.8717	0
CatF_103-116	C9_186-194	0.2571	0.6228	0
CatF_236-245	C9_186-194	0.4286	0.3965	0
CatF_266-278	C9_186-194	0.4286	0.3965	0
CatF_442-450	C9_186-194	0.4286	0.3965	0
CTSL_105-116	C9_186-194	0.0857	0.8717	0
CTSZ_261-270	C9_186-194	-0.0857	0.8717	0
CTSZ_39-47	C9_186-194	0.4857	0.3287	0
DPP7_113-123	C9_186-194	0.0857	0.8717	0
DPP7_40-47	C9_186-194	0.3143	0.5441	0
DPP7_449-462	C9_186-194	0.3143	0.5441	0
GM2A_170-179	C9_186-194	0.3143	0.5441	0
GM2A_89-96	C9_186-194	0.5429	0.2657	0
HEXB_285-300	C9_186-194	-0.2	0.704	0
HEXB_391-400	C9_186-194	0.2571	0.6228	0
LAMP1_138-146	C9_186-194	0.3714	0.4685	0
LAMP1_327-337	C9_186-194	0.0857	0.8717	0
LAMP1_357-363	C9_186-194	0.2571	0.6228	0
LAMP2_133-144	C9_186-194	0.1429	0.7872	0
LAMP2_145-152	C9_186-194	0.1429	0.7872	0
LAMP2_153-161	C9_186-194	0.3143	0.5441	0
LAMP2_281-289	C9_186-194	0.1429	0.7872	0
LYZ_52-59	C9_186-194	0.7143	0.1108	0
LYZ_69-80	C9_186-194	0.6	0.208	0
FUCA1_114-130	C9_186-194	-0.0857	0.8717	0
FUCA1_163-173	C9_186-194	0.0286	0.9572	0
FUCA1_344-354	C9_186-194	0.0286	0.9572	0
TCN2_300-313	C9_186-194	0.4286	0.3965	0
TCN2_393-399	C9_186-194	-0.0286	0.9572	0
TCN2_45-59	C9_186-194	0.4286	0.3965	0
TPP1_246-259	C9_186-194	-0.2571	0.6228	0
TPP1_507-520	C9_186-194	0.0857	0.8717	0
TPP1_61-78	C9_186-194	0.0286	0.9572	0
Ubiquitin_12-27	C9_186-194	0.1429	0.7872	0
Ubiquitin_64-72	C9_186-194	0.1429	0.7872	0
CTSB_210-220	C9_232-242	0.0286	0.9572	0
CTSB_58-71	C9_232-242	0.0286	0.9572	0
CTSB_80-87	C9_232-242	0.1429	0.7872	0
CTSD_112-122	C9_232-242	-0.1429	0.7872	0
CTSD_349-357	C9_232-242	-0.0857	0.8717	0
CTSD_55-72	C9_232-242	-0.0857	0.8717	0
CatF_103-116	C9_232-242	0.2571	0.6228	0
CatF_236-245	C9_232-242	0.4286	0.3965	0
CatF_266-278	C9_232-242	0.4286	0.3965	0
CatF_442-450	C9_232-242	0.4286	0.3965	0
CTSL_105-116	C9_232-242	0.0857	0.8717	0
CTSZ_261-270	C9_232-242	-0.0857	0.8717	0
CTSZ_39-47	C9_232-242	0.4857	0.3287	0
DPP7_113-123	C9_232-242	0.0857	0.8717	0
DPP7_40-47	C9_232-242	0.3143	0.5441	0
DPP7_449-462	C9_232-242	0.3143	0.5441	0
GM2A_170-179	C9_232-242	0.3143	0.5441	0
GM2A_89-96	C9_232-242	0.5429	0.2657	0
HEXB_285-300	C9_232-242	-0.2	0.704	0
HEXB_391-400	C9_232-242	0.2571	0.6228	0
LAMP1_138-146	C9_232-242	0.3714	0.4685	0
LAMP1_327-337	C9_232-242	0.0857	0.8717	0
LAMP1_357-363	C9_232-242	0.2571	0.6228	0
LAMP2_133-144	C9_232-242	0.1429	0.7872	0
LAMP2_145-152	C9_232-242	0.1429	0.7872	0
LAMP2_153-161	C9_232-242	0.3143	0.5441	0
LAMP2_281-289	C9_232-242	0.1429	0.7872	0
LYZ_52-59	C9_232-242	0.7143	0.1108	0
LYZ_69-80	C9_232-242	0.6	0.208	0
FUCA1_114-130	C9_232-242	-0.0857	0.8717	0
FUCA1_163-173	C9_232-242	0.0286	0.9572	0
FUCA1_344-354	C9_232-242	0.0286	0.9572	0
TCN2_300-313	C9_232-242	0.4286	0.3965	0
TCN2_393-399	C9_232-242	-0.0286	0.9572	0
TCN2_45-59	C9_232-242	0.4286	0.3965	0
TPP1_246-259	C9_232-242	-0.2571	0.6228	0
TPP1_507-520	C9_232-242	0.0857	0.8717	0
TPP1_61-78	C9_232-242	0.0286	0.9572	0
Ubiquitin_12-27	C9_232-242	0.1429	0.7872	0
Ubiquitin_64-72	C9_232-242	0.1429	0.7872	0
CTSB_210-220	C9_473-483	0.2	0.704	0
CTSB_58-71	C9_473-483	0.2	0.704	0
CTSB_80-87	C9_473-483	0.2571	0.6228	0
CTSD_112-122	C9_473-483	-0.0857	0.8717	0
CTSD_349-357	C9_473-483	-0.0286	0.9572	0
CTSD_55-72	C9_473-483	-0.0286	0.9572	0
CatF_103-116	C9_473-483	0.4857	0.3287	0
CatF_236-245	C9_473-483	0.6	0.208	0
CatF_266-278	C9_473-483	0.6	0.208	0
CatF_442-450	C9_473-483	0.6	0.208	0
CTSL_105-116	C9_473-483	0.2571	0.6228	0
CTSZ_261-270	C9_473-483	0.2	0.704	0
CTSZ_39-47	C9_473-483	0.6	0.208	0
DPP7_113-123	C9_473-483	0.1429	0.7872	0
DPP7_40-47	C9_473-483	0.4857	0.3287	0
DPP7_449-462	C9_473-483	0.4857	0.3287	0
GM2A_170-179	C9_473-483	0.4286	0.3965	0
GM2A_89-96	C9_473-483	0.6	0.208	0
HEXB_285-300	C9_473-483	0.0286	0.9572	0
HEXB_391-400	C9_473-483	0.4857	0.3287	0
LAMP1_138-146	C9_473-483	0.4286	0.3965	0
LAMP1_327-337	C9_473-483	0.2571	0.6228	0
LAMP1_357-363	C9_473-483	0.4857	0.3287	0
LAMP2_133-144	C9_473-483	0.2571	0.6228	0
LAMP2_145-152	C9_473-483	0.2571	0.6228	0
LAMP2_153-161	C9_473-483	0.3714	0.4685	0
LAMP2_281-289	C9_473-483	0.2571	0.6228	0
LYZ_52-59	C9_473-483	0.8286	0.0416	0
LYZ_69-80	C9_473-483	0.7714	0.0724	0
FUCA1_114-130	C9_473-483	-0.0286	0.9572	0
FUCA1_163-173	C9_473-483	0.1429	0.7872	0
FUCA1_344-354	C9_473-483	0.1429	0.7872	0
TCN2_300-313	C9_473-483	0.6	0.208	0
TCN2_393-399	C9_473-483	-0.0857	0.8717	0
TCN2_45-59	C9_473-483	0.6	0.208	0
TPP1_246-259	C9_473-483	-0.0857	0.8717	0
TPP1_507-520	C9_473-483	0.2571	0.6228	0
TPP1_61-78	C9_473-483	0.0857	0.8717	0
Ubiquitin_12-27	C9_473-483	0.2	0.704	0
Ubiquitin_64-72	C9_473-483	0.2	0.704	0
CTSB_210-220	C9_497-508	0.2	0.704	0
CTSB_58-71	C9_497-508	0.2	0.704	0
CTSB_80-87	C9_497-508	0.2571	0.6228	0
CTSD_112-122	C9_497-508	-0.0857	0.8717	0
CTSD_349-357	C9_497-508	-0.0286	0.9572	0
CTSD_55-72	C9_497-508	-0.0286	0.9572	0
CatF_103-116	C9_497-508	0.4857	0.3287	0
CatF_236-245	C9_497-508	0.6	0.208	0
CatF_266-278	C9_497-508	0.6	0.208	0
CatF_442-450	C9_497-508	0.6	0.208	0
CTSL_105-116	C9_497-508	0.2571	0.6228	0
CTSZ_261-270	C9_497-508	0.2	0.704	0
CTSZ_39-47	C9_497-508	0.6	0.208	0
DPP7_113-123	C9_497-508	0.1429	0.7872	0
DPP7_40-47	C9_497-508	0.4857	0.3287	0
DPP7_449-462	C9_497-508	0.4857	0.3287	0
GM2A_170-179	C9_497-508	0.4286	0.3965	0
GM2A_89-96	C9_497-508	0.6	0.208	0
HEXB_285-300	C9_497-508	0.0286	0.9572	0
HEXB_391-400	C9_497-508	0.4857	0.3287	0
LAMP1_138-146	C9_497-508	0.4286	0.3965	0
LAMP1_327-337	C9_497-508	0.2571	0.6228	0
LAMP1_357-363	C9_497-508	0.4857	0.3287	0
LAMP2_133-144	C9_497-508	0.2571	0.6228	0
LAMP2_145-152	C9_497-508	0.2571	0.6228	0
LAMP2_153-161	C9_497-508	0.3714	0.4685	0
LAMP2_281-289	C9_497-508	0.2571	0.6228	0
LYZ_52-59	C9_497-508	0.8286	0.0416	0
LYZ_69-80	C9_497-508	0.7714	0.0724	0
FUCA1_114-130	C9_497-508	-0.0286	0.9572	0
FUCA1_163-173	C9_497-508	0.1429	0.7872	0
FUCA1_344-354	C9_497-508	0.1429	0.7872	0
TCN2_300-313	C9_497-508	0.6	0.208	0
TCN2_393-399	C9_497-508	-0.0857	0.8717	0
TCN2_45-59	C9_497-508	0.6	0.208	0
TPP1_246-259	C9_497-508	-0.0857	0.8717	0
TPP1_507-520	C9_497-508	0.2571	0.6228	0
TPP1_61-78	C9_497-508	0.0857	0.8717	0
Ubiquitin_12-27	C9_497-508	0.2	0.704	0
Ubiquitin_64-72	C9_497-508	0.2	0.704	0
CTSD_112-122	CTSB_210-220	0.8286	0.0416	0
CTSD_349-357	CTSB_210-220	0.7714	0.0724	0
CTSD_55-72	CTSB_210-220	0.7714	0.0724	0
CatF_103-116	CTSB_210-220	0.8857	0.0188	0
CatF_236-245	CTSB_210-220	0.7714	0.0724	0
CatF_266-278	CTSB_210-220	0.7714	0.0724	0
CatF_442-450	CTSB_210-220	0.7714	0.0724	0
CTSZ_261-270	CTSB_210-220	0.8857	0.0188	0
CTSZ_39-47	CTSB_210-220	0.7714	0.0724	0
DPP7_113-123	CTSB_210-220	0.4857	0.3287	0
DPP7_40-47	CTSB_210-220	0.6	0.208	0
DPP7_449-462	CTSB_210-220	0.6	0.208	0
GM2A_170-179	CTSB_210-220	0.6571	0.1562	0
GM2A_89-96	CTSB_210-220	0.4286	0.3965	0
HEXB_285-300	CTSB_210-220	0.8857	0.0188	0
HEXB_391-400	CTSB_210-220	0.8857	0.0188	0
LAMP1_138-146	CTSB_210-220	0.7714	0.0724	0
LAMP1_357-363	CTSB_210-220	0.8857	0.0188	0
LAMP2_153-161	CTSB_210-220	0.8286	0.0416	0
LYZ_52-59	CTSB_210-220	0.3714	0.4685	0
LYZ_69-80	CTSB_210-220	0.4286	0.3965	0
FUCA1_114-130	CTSB_210-220	0.7714	0.0724	0
FUCA1_163-173	CTSB_210-220	0.8286	0.0416	0
FUCA1_344-354	CTSB_210-220	0.8286	0.0416	0
TCN2_300-313	CTSB_210-220	0.7714	0.0724	0
TCN2_393-399	CTSB_210-220	-0.5429	0.2657	0
TCN2_45-59	CTSB_210-220	0.7714	0.0724	0
TPP1_246-259	CTSB_210-220	0.7714	0.0724	0
TPP1_61-78	CTSB_210-220	0.6	0.208	0
Ubiquitin_12-27	CTSB_210-220	0.7143	0.1108	0
Ubiquitin_64-72	CTSB_210-220	0.7143	0.1108	0
CTSD_112-122	CTSB_58-71	0.8286	0.0416	0
CTSD_349-357	CTSB_58-71	0.7714	0.0724	0
CTSD_55-72	CTSB_58-71	0.7714	0.0724	0
CatF_103-116	CTSB_58-71	0.8857	0.0188	0
CatF_236-245	CTSB_58-71	0.7714	0.0724	0
CatF_266-278	CTSB_58-71	0.7714	0.0724	0
CatF_442-450	CTSB_58-71	0.7714	0.0724	0
CTSZ_261-270	CTSB_58-71	0.8857	0.0188	0
CTSZ_39-47	CTSB_58-71	0.7714	0.0724	0
DPP7_113-123	CTSB_58-71	0.4857	0.3287	0
DPP7_40-47	CTSB_58-71	0.6	0.208	0
DPP7_449-462	CTSB_58-71	0.6	0.208	0
GM2A_170-179	CTSB_58-71	0.6571	0.1562	0
GM2A_89-96	CTSB_58-71	0.4286	0.3965	0
HEXB_285-300	CTSB_58-71	0.8857	0.0188	0
HEXB_391-400	CTSB_58-71	0.8857	0.0188	0
LAMP1_138-146	CTSB_58-71	0.7714	0.0724	0
LAMP1_357-363	CTSB_58-71	0.8857	0.0188	0
LAMP2_153-161	CTSB_58-71	0.8286	0.0416	0
LYZ_52-59	CTSB_58-71	0.3714	0.4685	0
LYZ_69-80	CTSB_58-71	0.4286	0.3965	0
FUCA1_114-130	CTSB_58-71	0.7714	0.0724	0
FUCA1_163-173	CTSB_58-71	0.8286	0.0416	0
FUCA1_344-354	CTSB_58-71	0.8286	0.0416	0
TCN2_300-313	CTSB_58-71	0.7714	0.0724	0
TCN2_393-399	CTSB_58-71	-0.5429	0.2657	0
TCN2_45-59	CTSB_58-71	0.7714	0.0724	0
TPP1_246-259	CTSB_58-71	0.7714	0.0724	0
TPP1_61-78	CTSB_58-71	0.6	0.208	0
Ubiquitin_12-27	CTSB_58-71	0.7143	0.1108	0
Ubiquitin_64-72	CTSB_58-71	0.7143	0.1108	0
CTSD_112-122	CTSB_80-87	0.7143	0.1108	0
CTSD_349-357	CTSB_80-87	0.6	0.208	0
CTSD_55-72	CTSB_80-87	0.6	0.208	0
CatF_103-116	CTSB_80-87	0.7714	0.0724	0
CatF_236-245	CTSB_80-87	0.7143	0.1108	0
CatF_266-278	CTSB_80-87	0.7143	0.1108	0
CatF_442-450	CTSB_80-87	0.7143	0.1108	0
CTSL_105-116	CTSB_80-87	0.8286	0.0416	0
CTSZ_261-270	CTSB_80-87	0.7714	0.0724	0
CTSZ_39-47	CTSB_80-87	0.8857	0.0188	0
DPP7_113-123	CTSB_80-87	0.2571	0.6228	0
DPP7_40-47	CTSB_80-87	0.3714	0.4685	0
DPP7_449-462	CTSB_80-87	0.3714	0.4685	0
GM2A_170-179	CTSB_80-87	0.8286	0.0416	0
GM2A_89-96	CTSB_80-87	0.6571	0.1562	0
HEXB_285-300	CTSB_80-87	0.7143	0.1108	0
HEXB_391-400	CTSB_80-87	0.7714	0.0724	0
LAMP1_138-146	CTSB_80-87	0.8286	0.0416	0
LAMP1_327-337	CTSB_80-87	0.8286	0.0416	0
LAMP1_357-363	CTSB_80-87	0.7714	0.0724	0
LYZ_52-59	CTSB_80-87	0.4286	0.3965	0
LYZ_69-80	CTSB_80-87	0.3714	0.4685	0
FUCA1_114-130	CTSB_80-87	0.6	0.208	0
FUCA1_163-173	CTSB_80-87	0.6571	0.1562	0
FUCA1_344-354	CTSB_80-87	0.6571	0.1562	0
TCN2_300-313	CTSB_80-87	0.7143	0.1108	0
TCN2_393-399	CTSB_80-87	-0.3714	0.4685	0
TCN2_45-59	CTSB_80-87	0.7143	0.1108	0
TPP1_246-259	CTSB_80-87	0.5429	0.2657	0
TPP1_507-520	CTSB_80-87	0.8286	0.0416	0
TPP1_61-78	CTSB_80-87	0.3714	0.4685	0
Ubiquitin_12-27	CTSB_80-87	0.8857	0.0188	0
Ubiquitin_64-72	CTSB_80-87	0.8857	0.0188	0
CatF_103-116	CTSD_112-122	0.6	0.208	0
CatF_236-245	CTSD_112-122	0.4286	0.3965	0
CatF_266-278	CTSD_112-122	0.4286	0.3965	0
CatF_442-450	CTSD_112-122	0.4286	0.3965	0
CTSL_105-116	CTSD_112-122	0.7714	0.0724	0
CTSZ_261-270	CTSD_112-122	0.6	0.208	0
CTSZ_39-47	CTSD_112-122	0.3714	0.4685	0
DPP7_113-123	CTSD_112-122	0.7714	0.0724	0
DPP7_40-47	CTSD_112-122	0.5429	0.2657	0
DPP7_449-462	CTSD_112-122	0.5429	0.2657	0
GM2A_170-179	CTSD_112-122	0.2	0.704	0
GM2A_89-96	CTSD_112-122	-0.0286	0.9572	0
HEXB_285-300	CTSD_112-122	0.7143	0.1108	0
HEXB_391-400	CTSD_112-122	0.6	0.208	0
LAMP1_138-146	CTSD_112-122	0.4857	0.3287	0
LAMP1_327-337	CTSD_112-122	0.7714	0.0724	0
LAMP1_357-363	CTSD_112-122	0.6	0.208	0
LAMP2_133-144	CTSD_112-122	0.7143	0.1108	0
LAMP2_145-152	CTSD_112-122	0.7143	0.1108	0
LAMP2_153-161	CTSD_112-122	0.5429	0.2657	0
LAMP2_281-289	CTSD_112-122	0.7143	0.1108	0
LYZ_52-59	CTSD_112-122	0.1429	0.7872	0
LYZ_69-80	CTSD_112-122	0.2571	0.6228	0
FUCA1_163-173	CTSD_112-122	0.8286	0.0416	0
FUCA1_344-354	CTSD_112-122	0.8286	0.0416	0
TCN2_300-313	CTSD_112-122	0.4286	0.3965	0
TCN2_393-399	CTSD_112-122	-0.8286	0.0416	0
TCN2_45-59	CTSD_112-122	0.4286	0.3965	0
TPP1_246-259	CTSD_112-122	0.7714	0.0724	0
TPP1_507-520	CTSD_112-122	0.7714	0.0724	0
TPP1_61-78	CTSD_112-122	0.8286	0.0416	0
Ubiquitin_12-27	CTSD_112-122	0.3714	0.4685	0
Ubiquitin_64-72	CTSD_112-122	0.3714	0.4685	0
CatF_103-116	CTSD_349-357	0.6571	0.1562	0
CatF_236-245	CTSD_349-357	0.5429	0.2657	0
CatF_266-278	CTSD_349-357	0.5429	0.2657	0
CatF_442-450	CTSD_349-357	0.5429	0.2657	0
CTSL_105-116	CTSD_349-357	0.8286	0.0416	0
CTSZ_261-270	CTSD_349-357	0.5429	0.2657	0
CTSZ_39-47	CTSD_349-357	0.3143	0.5441	0
DPP7_113-123	CTSD_349-357	0.8286	0.0416	0
DPP7_40-47	CTSD_349-357	0.7143	0.1108	0
DPP7_449-462	CTSD_349-357	0.7143	0.1108	0
GM2A_170-179	CTSD_349-357	0.0857	0.8717	0
GM2A_89-96	CTSD_349-357	-0.1429	0.7872	0
HEXB_285-300	CTSD_349-357	0.7714	0.0724	0
HEXB_391-400	CTSD_349-357	0.6571	0.1562	0
LAMP1_138-146	CTSD_349-357	0.5429	0.2657	0
LAMP1_327-337	CTSD_349-357	0.8286	0.0416	0
LAMP1_357-363	CTSD_349-357	0.6571	0.1562	0
LAMP2_133-144	CTSD_349-357	0.6	0.208	0
LAMP2_145-152	CTSD_349-357	0.6	0.208	0
LAMP2_153-161	CTSD_349-357	0.4857	0.3287	0
LAMP2_281-289	CTSD_349-357	0.6	0.208	0
LYZ_52-59	CTSD_349-357	0.0286	0.9572	0
LYZ_69-80	CTSD_349-357	0.2	0.704	0
TCN2_300-313	CTSD_349-357	0.5429	0.2657	0
TCN2_393-399	CTSD_349-357	-0.7714	0.0724	0
TCN2_45-59	CTSD_349-357	0.5429	0.2657	0
TPP1_246-259	CTSD_349-357	0.8857	0.0188	0
TPP1_507-520	CTSD_349-357	0.8286	0.0416	0
Ubiquitin_12-27	CTSD_349-357	0.2571	0.6228	0
Ubiquitin_64-72	CTSD_349-357	0.2571	0.6228	0
CatF_103-116	CTSD_55-72	0.6571	0.1562	0
CatF_236-245	CTSD_55-72	0.5429	0.2657	0
CatF_266-278	CTSD_55-72	0.5429	0.2657	0
CatF_442-450	CTSD_55-72	0.5429	0.2657	0
CTSL_105-116	CTSD_55-72	0.8286	0.0416	0
CTSZ_261-270	CTSD_55-72	0.5429	0.2657	0
CTSZ_39-47	CTSD_55-72	0.3143	0.5441	0
DPP7_113-123	CTSD_55-72	0.8286	0.0416	0
DPP7_40-47	CTSD_55-72	0.7143	0.1108	0
DPP7_449-462	CTSD_55-72	0.7143	0.1108	0
GM2A_170-179	CTSD_55-72	0.0857	0.8717	0
GM2A_89-96	CTSD_55-72	-0.1429	0.7872	0
HEXB_285-300	CTSD_55-72	0.7714	0.0724	0
HEXB_391-400	CTSD_55-72	0.6571	0.1562	0
LAMP1_138-146	CTSD_55-72	0.5429	0.2657	0
LAMP1_327-337	CTSD_55-72	0.8286	0.0416	0
LAMP1_357-363	CTSD_55-72	0.6571	0.1562	0
LAMP2_133-144	CTSD_55-72	0.6	0.208	0
LAMP2_145-152	CTSD_55-72	0.6	0.208	0
LAMP2_153-161	CTSD_55-72	0.4857	0.3287	0
LAMP2_281-289	CTSD_55-72	0.6	0.208	0
LYZ_52-59	CTSD_55-72	0.0286	0.9572	0
LYZ_69-80	CTSD_55-72	0.2	0.704	0
TCN2_300-313	CTSD_55-72	0.5429	0.2657	0
TCN2_393-399	CTSD_55-72	-0.7714	0.0724	0
TCN2_45-59	CTSD_55-72	0.5429	0.2657	0
TPP1_246-259	CTSD_55-72	0.8857	0.0188	0
TPP1_507-520	CTSD_55-72	0.8286	0.0416	0
Ubiquitin_12-27	CTSD_55-72	0.2571	0.6228	0
Ubiquitin_64-72	CTSD_55-72	0.2571	0.6228	0
CTSZ_261-270	CatF_103-116	0.8857	0.0188	0
CTSZ_39-47	CatF_103-116	0.7714	0.0724	0
DPP7_113-123	CatF_103-116	0.4857	0.3287	0
DPP7_40-47	CatF_103-116	0.8286	0.0416	0
DPP7_449-462	CatF_103-116	0.8286	0.0416	0
GM2A_170-179	CatF_103-116	0.6	0.208	0
GM2A_89-96	CatF_103-116	0.4286	0.3965	0
HEXB_285-300	CatF_103-116	0.8857	0.0188	0
LAMP1_138-146	CatF_103-116	0.7714	0.0724	0
LAMP2_133-144	CatF_103-116	0.7714	0.0724	0
LAMP2_145-152	CatF_103-116	0.7714	0.0724	0
LAMP2_153-161	CatF_103-116	0.7143	0.1108	0
LAMP2_281-289	CatF_103-116	0.7714	0.0724	0
LYZ_52-59	CatF_103-116	0.4857	0.3287	0
LYZ_69-80	CatF_103-116	0.6	0.208	0
FUCA1_114-130	CatF_103-116	0.6571	0.1562	0
FUCA1_163-173	CatF_103-116	0.8286	0.0416	0
FUCA1_344-354	CatF_103-116	0.8286	0.0416	0
TCN2_393-399	CatF_103-116	-0.4286	0.3965	0
TPP1_246-259	CatF_103-116	0.7714	0.0724	0
TPP1_61-78	CatF_103-116	0.6	0.208	0
Ubiquitin_12-27	CatF_103-116	0.5429	0.2657	0
Ubiquitin_64-72	CatF_103-116	0.5429	0.2657	0
CTSL_105-116	CatF_236-245	0.8857	0.0188	0
CTSZ_261-270	CatF_236-245	0.7143	0.1108	0
CTSZ_39-47	CatF_236-245	0.8286	0.0416	0
DPP7_113-123	CatF_236-245	0.3143	0.5441	0
DPP7_40-47	CatF_236-245	0.7714	0.0724	0
DPP7_449-462	CatF_236-245	0.7714	0.0724	0
GM2A_170-179	CatF_236-245	0.6571	0.1562	0
GM2A_89-96	CatF_236-245	0.5429	0.2657	0
HEXB_285-300	CatF_236-245	0.7714	0.0724	0
LAMP1_138-146	CatF_236-245	0.8857	0.0188	0
LAMP1_327-337	CatF_236-245	0.8857	0.0188	0
LAMP2_133-144	CatF_236-245	0.7143	0.1108	0
LAMP2_145-152	CatF_236-245	0.7143	0.1108	0
LAMP2_153-161	CatF_236-245	0.7714	0.0724	0
LAMP2_281-289	CatF_236-245	0.7143	0.1108	0
LYZ_52-59	CatF_236-245	0.4286	0.3965	0
LYZ_69-80	CatF_236-245	0.4857	0.3287	0
FUCA1_114-130	CatF_236-245	0.5429	0.2657	0
FUCA1_163-173	CatF_236-245	0.7714	0.0724	0
FUCA1_344-354	CatF_236-245	0.7714	0.0724	0
TCN2_393-399	CatF_236-245	-0.2	0.704	0
TPP1_246-259	CatF_236-245	0.6571	0.1562	0
TPP1_507-520	CatF_236-245	0.8857	0.0188	0
TPP1_61-78	CatF_236-245	0.4857	0.3287	0
Ubiquitin_12-27	CatF_236-245	0.6	0.208	0
Ubiquitin_64-72	CatF_236-245	0.6	0.208	0
CTSL_105-116	CatF_266-278	0.8857	0.0188	0
CTSZ_261-270	CatF_266-278	0.7143	0.1108	0
CTSZ_39-47	CatF_266-278	0.8286	0.0416	0
DPP7_113-123	CatF_266-278	0.3143	0.5441	0
DPP7_40-47	CatF_266-278	0.7714	0.0724	0
DPP7_449-462	CatF_266-278	0.7714	0.0724	0
GM2A_170-179	CatF_266-278	0.6571	0.1562	0
GM2A_89-96	CatF_266-278	0.5429	0.2657	0
HEXB_285-300	CatF_266-278	0.7714	0.0724	0
LAMP1_138-146	CatF_266-278	0.8857	0.0188	0
LAMP1_327-337	CatF_266-278	0.8857	0.0188	0
LAMP2_133-144	CatF_266-278	0.7143	0.1108	0
LAMP2_145-152	CatF_266-278	0.7143	0.1108	0
LAMP2_153-161	CatF_266-278	0.7714	0.0724	0
LAMP2_281-289	CatF_266-278	0.7143	0.1108	0
LYZ_52-59	CatF_266-278	0.4286	0.3965	0
LYZ_69-80	CatF_266-278	0.4857	0.3287	0
FUCA1_114-130	CatF_266-278	0.5429	0.2657	0
FUCA1_163-173	CatF_266-278	0.7714	0.0724	0
FUCA1_344-354	CatF_266-278	0.7714	0.0724	0
TCN2_393-399	CatF_266-278	-0.2	0.704	0
TPP1_246-259	CatF_266-278	0.6571	0.1562	0
TPP1_507-520	CatF_266-278	0.8857	0.0188	0
TPP1_61-78	CatF_266-278	0.4857	0.3287	0
Ubiquitin_12-27	CatF_266-278	0.6	0.208	0
Ubiquitin_64-72	CatF_266-278	0.6	0.208	0
CTSL_105-116	CatF_442-450	0.8857	0.0188	0
CTSZ_261-270	CatF_442-450	0.7143	0.1108	0
CTSZ_39-47	CatF_442-450	0.8286	0.0416	0
DPP7_113-123	CatF_442-450	0.3143	0.5441	0
DPP7_40-47	CatF_442-450	0.7714	0.0724	0
DPP7_449-462	CatF_442-450	0.7714	0.0724	0
GM2A_170-179	CatF_442-450	0.6571	0.1562	0
GM2A_89-96	CatF_442-450	0.5429	0.2657	0
HEXB_285-300	CatF_442-450	0.7714	0.0724	0
LAMP1_138-146	CatF_442-450	0.8857	0.0188	0
LAMP1_327-337	CatF_442-450	0.8857	0.0188	0
LAMP2_133-144	CatF_442-450	0.7143	0.1108	0
LAMP2_145-152	CatF_442-450	0.7143	0.1108	0
LAMP2_153-161	CatF_442-450	0.7714	0.0724	0
LAMP2_281-289	CatF_442-450	0.7143	0.1108	0
LYZ_52-59	CatF_442-450	0.4286	0.3965	0
LYZ_69-80	CatF_442-450	0.4857	0.3287	0
FUCA1_114-130	CatF_442-450	0.5429	0.2657	0
FUCA1_163-173	CatF_442-450	0.7714	0.0724	0
FUCA1_344-354	CatF_442-450	0.7714	0.0724	0
TCN2_393-399	CatF_442-450	-0.2	0.704	0
TPP1_246-259	CatF_442-450	0.6571	0.1562	0
TPP1_507-520	CatF_442-450	0.8857	0.0188	0
TPP1_61-78	CatF_442-450	0.4857	0.3287	0
Ubiquitin_12-27	CatF_442-450	0.6	0.208	0
Ubiquitin_64-72	CatF_442-450	0.6	0.208	0
CTSZ_261-270	CTSL_105-116	0.8286	0.0416	0
CTSZ_39-47	CTSL_105-116	0.7143	0.1108	0
DPP7_113-123	CTSL_105-116	0.5429	0.2657	0
DPP7_40-47	CTSL_105-116	0.7714	0.0724	0
DPP7_449-462	CTSL_105-116	0.7714	0.0724	0
GM2A_170-179	CTSL_105-116	0.5429	0.2657	0
GM2A_89-96	CTSL_105-116	0.3143	0.5441	0
LAMP1_138-146	CTSL_105-116	0.8286	0.0416	0
LAMP2_133-144	CTSL_105-116	0.8286	0.0416	0
LAMP2_145-152	CTSL_105-116	0.8286	0.0416	0
LAMP2_153-161	CTSL_105-116	0.7714	0.0724	0
LAMP2_281-289	CTSL_105-116	0.8286	0.0416	0
LYZ_52-59	CTSL_105-116	0.2571	0.6228	0
LYZ_69-80	CTSL_105-116	0.3714	0.4685	0
FUCA1_114-130	CTSL_105-116	0.8286	0.0416	0
TCN2_300-313	CTSL_105-116	0.8857	0.0188	0
TCN2_393-399	CTSL_105-116	-0.4857	0.3287	0
TCN2_45-59	CTSL_105-116	0.8857	0.0188	0
TPP1_246-259	CTSL_105-116	0.8857	0.0188	0
TPP1_61-78	CTSL_105-116	0.7143	0.1108	0
Ubiquitin_12-27	CTSL_105-116	0.6	0.208	0
Ubiquitin_64-72	CTSL_105-116	0.6	0.208	0
DPP7_113-123	CTSZ_261-270	0.3714	0.4685	0
DPP7_40-47	CTSZ_261-270	0.6	0.208	0
DPP7_449-462	CTSZ_261-270	0.6	0.208	0
GM2A_170-179	CTSZ_261-270	0.6	0.208	0
GM2A_89-96	CTSZ_261-270	0.3714	0.4685	0
HEXB_285-300	CTSZ_261-270	0.8857	0.0188	0
HEXB_391-400	CTSZ_261-270	0.8857	0.0188	0
LAMP1_138-146	CTSZ_261-270	0.5429	0.2657	0
LAMP1_327-337	CTSZ_261-270	0.8286	0.0416	0
LAMP1_357-363	CTSZ_261-270	0.8857	0.0188	0
LAMP2_133-144	CTSZ_261-270	0.7714	0.0724	0
LAMP2_145-152	CTSZ_261-270	0.7714	0.0724	0
LAMP2_153-161	CTSZ_261-270	0.6	0.208	0
LAMP2_281-289	CTSZ_261-270	0.7714	0.0724	0
LYZ_52-59	CTSZ_261-270	0.4286	0.3965	0
LYZ_69-80	CTSZ_261-270	0.5429	0.2657	0
FUCA1_114-130	CTSZ_261-270	0.5429	0.2657	0
FUCA1_163-173	CTSZ_261-270	0.6571	0.1562	0
FUCA1_344-354	CTSZ_261-270	0.6571	0.1562	0
TCN2_300-313	CTSZ_261-270	0.7143	0.1108	0
TCN2_393-399	CTSZ_261-270	-0.4286	0.3965	0
TCN2_45-59	CTSZ_261-270	0.7143	0.1108	0
TPP1_246-259	CTSZ_261-270	0.7143	0.1108	0
TPP1_507-520	CTSZ_261-270	0.8286	0.0416	0
TPP1_61-78	CTSZ_261-270	0.4286	0.3965	0
Ubiquitin_12-27	CTSZ_261-270	0.5429	0.2657	0
Ubiquitin_64-72	CTSZ_261-270	0.5429	0.2657	0
CTSZ_261-270	CTSZ_39-47	0.6571	0.1562	0
DPP7_113-123	CTSZ_39-47	0.0286	0.9572	0
DPP7_40-47	CTSZ_39-47	0.3714	0.4685	0
DPP7_449-462	CTSZ_39-47	0.3714	0.4685	0
GM2A_89-96	CTSZ_39-47	0.8857	0.0188	0
HEXB_285-300	CTSZ_39-47	0.5429	0.2657	0
HEXB_391-400	CTSZ_39-47	0.7714	0.0724	0
LAMP1_138-146	CTSZ_39-47	0.8857	0.0188	0
LAMP1_327-337	CTSZ_39-47	0.7143	0.1108	0
LAMP1_357-363	CTSZ_39-47	0.7714	0.0724	0
LAMP2_133-144	CTSZ_39-47	0.8857	0.0188	0
LAMP2_145-152	CTSZ_39-47	0.8857	0.0188	0
LAMP2_281-289	CTSZ_39-47	0.8857	0.0188	0
LYZ_52-59	CTSZ_39-47	0.6	0.208	0
LYZ_69-80	CTSZ_39-47	0.4857	0.3287	0
FUCA1_114-130	CTSZ_39-47	0.3143	0.5441	0
FUCA1_163-173	CTSZ_39-47	0.4857	0.3287	0
FUCA1_344-354	CTSZ_39-47	0.4857	0.3287	0
TCN2_300-313	CTSZ_39-47	0.8286	0.0416	0
TCN2_393-399	CTSZ_39-47	-0.0857	0.8717	0
TCN2_45-59	CTSZ_39-47	0.8286	0.0416	0
TPP1_246-259	CTSZ_39-47	0.3143	0.5441	0
TPP1_507-520	CTSZ_39-47	0.7143	0.1108	0
TPP1_61-78	CTSZ_39-47	0.1429	0.7872	0
Ubiquitin_12-27	CTSZ_39-47	0.8857	0.0188	0
Ubiquitin_64-72	CTSZ_39-47	0.8857	0.0188	0
DPP7_449-462	DPP7_113-123	0.7714	0.0724	0
GM2A_170-179	DPP7_113-123	-0.2571	0.6228	0
GM2A_89-96	DPP7_113-123	-0.3714	0.4685	0
HEXB_285-300	DPP7_113-123	0.4857	0.3287	0
HEXB_391-400	DPP7_113-123	0.4857	0.3287	0
LAMP1_138-146	DPP7_113-123	0.1429	0.7872	0
LAMP1_327-337	DPP7_113-123	0.5429	0.2657	0
LAMP1_357-363	DPP7_113-123	0.4857	0.3287	0
LAMP2_133-144	DPP7_113-123	0.2571	0.6228	0
LAMP2_145-152	DPP7_113-123	0.2571	0.6228	0
LAMP2_153-161	DPP7_113-123	0.0857	0.8717	0
LAMP2_281-289	DPP7_113-123	0.2571	0.6228	0
LYZ_52-59	DPP7_113-123	0.2571	0.6228	0
LYZ_69-80	DPP7_113-123	0.4857	0.3287	0
FUCA1_114-130	DPP7_113-123	0.8286	0.0416	0
FUCA1_163-173	DPP7_113-123	0.7143	0.1108	0
FUCA1_344-354	DPP7_113-123	0.7143	0.1108	0
TCN2_300-313	DPP7_113-123	0.3143	0.5441	0
TCN2_45-59	DPP7_113-123	0.3143	0.5441	0
TPP1_246-259	DPP7_113-123	0.6571	0.1562	0
TPP1_507-520	DPP7_113-123	0.5429	0.2657	0
Ubiquitin_12-27	DPP7_113-123	-0.2	0.704	0
Ubiquitin_64-72	DPP7_113-123	-0.2	0.704	0
DPP7_113-123	DPP7_40-47	0.7714	0.0724	0
GM2A_170-179	DPP7_40-47	0.0857	0.8717	0
GM2A_89-96	DPP7_40-47	-0.0286	0.9572	0
HEXB_285-300	DPP7_40-47	0.7143	0.1108	0
HEXB_391-400	DPP7_40-47	0.8286	0.0416	0
LAMP1_138-146	DPP7_40-47	0.4857	0.3287	0
LAMP1_327-337	DPP7_40-47	0.7714	0.0724	0
LAMP1_357-363	DPP7_40-47	0.8286	0.0416	0
LAMP2_133-144	DPP7_40-47	0.3714	0.4685	0
LAMP2_145-152	DPP7_40-47	0.3714	0.4685	0
LAMP2_153-161	DPP7_40-47	0.3143	0.5441	0
LAMP2_281-289	DPP7_40-47	0.3714	0.4685	0
LYZ_52-59	DPP7_40-47	0.3714	0.4685	0
LYZ_69-80	DPP7_40-47	0.6	0.208	0
FUCA1_114-130	DPP7_40-47	0.7143	0.1108	0
FUCA1_163-173	DPP7_40-47	0.8286	0.0416	0
FUCA1_344-354	DPP7_40-47	0.8286	0.0416	0
TCN2_300-313	DPP7_40-47	0.7714	0.0724	0
TCN2_393-399	DPP7_40-47	-0.6	0.208	0
TCN2_45-59	DPP7_40-47	0.7714	0.0724	0
TPP1_246-259	DPP7_40-47	0.7714	0.0724	0
TPP1_507-520	DPP7_40-47	0.7714	0.0724	0
TPP1_61-78	DPP7_40-47	0.8286	0.0416	0
Ubiquitin_12-27	DPP7_40-47	0.0286	0.9572	0
Ubiquitin_64-72	DPP7_40-47	0.0286	0.9572	0
GM2A_170-179	DPP7_449-462	0.0857	0.8717	0
GM2A_89-96	DPP7_449-462	-0.0286	0.9572	0
HEXB_285-300	DPP7_449-462	0.7143	0.1108	0
HEXB_391-400	DPP7_449-462	0.8286	0.0416	0
LAMP1_138-146	DPP7_449-462	0.4857	0.3287	0
LAMP1_327-337	DPP7_449-462	0.7714	0.0724	0
LAMP1_357-363	DPP7_449-462	0.8286	0.0416	0
LAMP2_133-144	DPP7_449-462	0.3714	0.4685	0
LAMP2_145-152	DPP7_449-462	0.3714	0.4685	0
LAMP2_153-161	DPP7_449-462	0.3143	0.5441	0
LAMP2_281-289	DPP7_449-462	0.3714	0.4685	0
LYZ_52-59	DPP7_449-462	0.3714	0.4685	0
LYZ_69-80	DPP7_449-462	0.6	0.208	0
FUCA1_114-130	DPP7_449-462	0.7143	0.1108	0
FUCA1_163-173	DPP7_449-462	0.8286	0.0416	0
FUCA1_344-354	DPP7_449-462	0.8286	0.0416	0
TCN2_300-313	DPP7_449-462	0.7714	0.0724	0
TCN2_393-399	DPP7_449-462	-0.6	0.208	0
TCN2_45-59	DPP7_449-462	0.7714	0.0724	0
TPP1_246-259	DPP7_449-462	0.7714	0.0724	0
TPP1_507-520	DPP7_449-462	0.7714	0.0724	0
TPP1_61-78	DPP7_449-462	0.8286	0.0416	0
Ubiquitin_12-27	DPP7_449-462	0.0286	0.9572	0
Ubiquitin_64-72	DPP7_449-462	0.0286	0.9572	0
HEXB_285-300	GM2A_170-179	0.4286	0.3965	0
HEXB_391-400	GM2A_170-179	0.6	0.208	0
LAMP1_138-146	GM2A_170-179	0.7714	0.0724	0
LAMP1_327-337	GM2A_170-179	0.5429	0.2657	0
LAMP1_357-363	GM2A_170-179	0.6	0.208	0
LAMP2_133-144	GM2A_170-179	0.8286	0.0416	0
LAMP2_145-152	GM2A_170-179	0.8286	0.0416	0
LAMP2_153-161	GM2A_170-179	0.8857	0.0188	0
LAMP2_281-289	GM2A_170-179	0.8286	0.0416	0
LYZ_52-59	GM2A_170-179	0.4857	0.3287	0
LYZ_69-80	GM2A_170-179	0.3143	0.5441	0
FUCA1_114-130	GM2A_170-179	0.0857	0.8717	0
FUCA1_163-173	GM2A_170-179	0.2571	0.6228	0
FUCA1_344-354	GM2A_170-179	0.2571	0.6228	0
TCN2_300-313	GM2A_170-179	0.6571	0.1562	0
TCN2_393-399	GM2A_170-179	0.1429	0.7872	0
TCN2_45-59	GM2A_170-179	0.6571	0.1562	0
TPP1_246-259	GM2A_170-179	0.1429	0.7872	0
TPP1_507-520	GM2A_170-179	0.5429	0.2657	0
TPP1_61-78	GM2A_170-179	-0.1429	0.7872	0
HEXB_285-300	GM2A_89-96	0.1429	0.7872	0
HEXB_391-400	GM2A_89-96	0.4286	0.3965	0
LAMP1_138-146	GM2A_89-96	0.6571	0.1562	0
LAMP1_327-337	GM2A_89-96	0.3143	0.5441	0
LAMP1_357-363	GM2A_89-96	0.4286	0.3965	0
LAMP2_133-144	GM2A_89-96	0.6571	0.1562	0
LAMP2_145-152	GM2A_89-96	0.6571	0.1562	0
LAMP2_153-161	GM2A_89-96	0.7714	0.0724	0
LAMP2_281-289	GM2A_89-96	0.6571	0.1562	0
LYZ_52-59	GM2A_89-96	0.6	0.208	0
LYZ_69-80	GM2A_89-96	0.3714	0.4685	0
FUCA1_114-130	GM2A_89-96	-0.1429	0.7872	0
FUCA1_163-173	GM2A_89-96	0.0286	0.9572	0
FUCA1_344-354	GM2A_89-96	0.0286	0.9572	0
TCN2_300-313	GM2A_89-96	0.5429	0.2657	0
TCN2_393-399	GM2A_89-96	0.2571	0.6228	0
TCN2_45-59	GM2A_89-96	0.5429	0.2657	0
TPP1_246-259	GM2A_89-96	-0.1429	0.7872	0
TPP1_507-520	GM2A_89-96	0.3143	0.5441	0
TPP1_61-78	GM2A_89-96	-0.3143	0.5441	0
Ubiquitin_12-27	GM2A_89-96	0.8286	0.0416	0
Ubiquitin_64-72	GM2A_89-96	0.8286	0.0416	0
HEXB_391-400	HEXB_285-300	0.8857	0.0188	0
LAMP1_138-146	HEXB_285-300	0.6571	0.1562	0
LAMP1_357-363	HEXB_285-300	0.8857	0.0188	0
LAMP2_133-144	HEXB_285-300	0.7143	0.1108	0
LAMP2_145-152	HEXB_285-300	0.7143	0.1108	0
LAMP2_153-161	HEXB_285-300	0.6	0.208	0
LAMP2_281-289	HEXB_285-300	0.7143	0.1108	0
LYZ_52-59	HEXB_285-300	0.0857	0.8717	0
LYZ_69-80	HEXB_285-300	0.2571	0.6228	0
FUCA1_114-130	HEXB_285-300	0.7714	0.0724	0
FUCA1_163-173	HEXB_285-300	0.8857	0.0188	0
FUCA1_344-354	HEXB_285-300	0.8857	0.0188	0
TCN2_300-313	HEXB_285-300	0.7714	0.0724	0
TCN2_393-399	HEXB_285-300	-0.4286	0.3965	0
TCN2_45-59	HEXB_285-300	0.7714	0.0724	0
TPP1_61-78	HEXB_285-300	0.6571	0.1562	0
Ubiquitin_12-27	HEXB_285-300	0.4857	0.3287	0
Ubiquitin_64-72	HEXB_285-300	0.4857	0.3287	0
LAMP1_138-146	HEXB_391-400	0.7714	0.0724	0
LAMP2_133-144	HEXB_391-400	0.7714	0.0724	0
LAMP2_145-152	HEXB_391-400	0.7714	0.0724	0
LAMP2_153-161	HEXB_391-400	0.7143	0.1108	0
LAMP2_281-289	HEXB_391-400	0.7714	0.0724	0
LYZ_52-59	HEXB_391-400	0.4857	0.3287	0
LYZ_69-80	HEXB_391-400	0.6	0.208	0
FUCA1_114-130	HEXB_391-400	0.6571	0.1562	0
FUCA1_163-173	HEXB_391-400	0.8286	0.0416	0
FUCA1_344-354	HEXB_391-400	0.8286	0.0416	0
TCN2_393-399	HEXB_391-400	-0.4286	0.3965	0
TPP1_246-259	HEXB_391-400	0.7714	0.0724	0
TPP1_61-78	HEXB_391-400	0.6	0.208	0
Ubiquitin_12-27	HEXB_391-400	0.5429	0.2657	0
Ubiquitin_64-72	HEXB_391-400	0.5429	0.2657	0
LAMP1_327-337	LAMP1_138-146	0.8286	0.0416	0
LAMP1_357-363	LAMP1_138-146	0.7714	0.0724	0
LAMP2_133-144	LAMP1_138-146	0.8286	0.0416	0
LAMP2_145-152	LAMP1_138-146	0.8286	0.0416	0
LAMP2_281-289	LAMP1_138-146	0.8286	0.0416	0
LYZ_52-59	LAMP1_138-146	0.2571	0.6228	0
LYZ_69-80	LAMP1_138-146	0.2	0.704	0
FUCA1_114-130	LAMP1_138-146	0.5429	0.2657	0
FUCA1_163-173	LAMP1_138-146	0.7143	0.1108	0
FUCA1_344-354	LAMP1_138-146	0.7143	0.1108	0
TCN2_300-313	LAMP1_138-146	0.8857	0.0188	0
TCN2_393-399	LAMP1_138-146	-0.0857	0.8717	0
TCN2_45-59	LAMP1_138-146	0.8857	0.0188	0
TPP1_246-259	LAMP1_138-146	0.5429	0.2657	0
TPP1_507-520	LAMP1_138-146	0.8286	0.0416	0
TPP1_61-78	LAMP1_138-146	0.3714	0.4685	0
Ubiquitin_12-27	LAMP1_138-146	0.8286	0.0416	0
Ubiquitin_64-72	LAMP1_138-146	0.8286	0.0416	0
LAMP2_133-144	LAMP1_327-337	0.8286	0.0416	0
LAMP2_145-152	LAMP1_327-337	0.8286	0.0416	0
LAMP2_153-161	LAMP1_327-337	0.7714	0.0724	0
LAMP2_281-289	LAMP1_327-337	0.8286	0.0416	0
LYZ_52-59	LAMP1_327-337	0.2571	0.6228	0
LYZ_69-80	LAMP1_327-337	0.3714	0.4685	0
FUCA1_114-130	LAMP1_327-337	0.8286	0.0416	0
TCN2_300-313	LAMP1_327-337	0.8857	0.0188	0
TCN2_393-399	LAMP1_327-337	-0.4857	0.3287	0
TCN2_45-59	LAMP1_327-337	0.8857	0.0188	0
TPP1_246-259	LAMP1_327-337	0.8857	0.0188	0
TPP1_61-78	LAMP1_327-337	0.7143	0.1108	0
Ubiquitin_12-27	LAMP1_327-337	0.6	0.208	0
Ubiquitin_64-72	LAMP1_327-337	0.6	0.208	0
LAMP2_133-144	LAMP1_357-363	0.7714	0.0724	0
LAMP2_145-152	LAMP1_357-363	0.7714	0.0724	0
LAMP2_153-161	LAMP1_357-363	0.7143	0.1108	0
LAMP2_281-289	LAMP1_357-363	0.7714	0.0724	0
LYZ_52-59	LAMP1_357-363	0.4857	0.3287	0
LYZ_69-80	LAMP1_357-363	0.6	0.208	0
FUCA1_114-130	LAMP1_357-363	0.6571	0.1562	0
FUCA1_163-173	LAMP1_357-363	0.8286	0.0416	0
FUCA1_344-354	LAMP1_357-363	0.8286	0.0416	0
TCN2_393-399	LAMP1_357-363	-0.4286	0.3965	0
TPP1_246-259	LAMP1_357-363	0.7714	0.0724	0
TPP1_61-78	LAMP1_357-363	0.6	0.208	0
Ubiquitin_12-27	LAMP1_357-363	0.5429	0.2657	0
Ubiquitin_64-72	LAMP1_357-363	0.5429	0.2657	0
LYZ_52-59	LAMP2_133-144	0.4286	0.3965	0
LYZ_69-80	LAMP2_133-144	0.3714	0.4685	0
FUCA1_114-130	LAMP2_133-144	0.6	0.208	0
FUCA1_163-173	LAMP2_133-144	0.6571	0.1562	0
FUCA1_344-354	LAMP2_133-144	0.6571	0.1562	0
TCN2_300-313	LAMP2_133-144	0.7143	0.1108	0
TCN2_393-399	LAMP2_133-144	-0.3714	0.4685	0
TCN2_45-59	LAMP2_133-144	0.7143	0.1108	0
TPP1_246-259	LAMP2_133-144	0.5429	0.2657	0
TPP1_507-520	LAMP2_133-144	0.8286	0.0416	0
TPP1_61-78	LAMP2_133-144	0.3714	0.4685	0
Ubiquitin_12-27	LAMP2_133-144	0.8857	0.0188	0
Ubiquitin_64-72	LAMP2_133-144	0.8857	0.0188	0
LYZ_52-59	LAMP2_145-152	0.4286	0.3965	0
LYZ_69-80	LAMP2_145-152	0.3714	0.4685	0
FUCA1_114-130	LAMP2_145-152	0.6	0.208	0
FUCA1_163-173	LAMP2_145-152	0.6571	0.1562	0
FUCA1_344-354	LAMP2_145-152	0.6571	0.1562	0
TCN2_300-313	LAMP2_145-152	0.7143	0.1108	0
TCN2_393-399	LAMP2_145-152	-0.3714	0.4685	0
TCN2_45-59	LAMP2_145-152	0.7143	0.1108	0
TPP1_246-259	LAMP2_145-152	0.5429	0.2657	0
TPP1_507-520	LAMP2_145-152	0.8286	0.0416	0
TPP1_61-78	LAMP2_145-152	0.3714	0.4685	0
Ubiquitin_12-27	LAMP2_145-152	0.8857	0.0188	0
Ubiquitin_64-72	LAMP2_145-152	0.8857	0.0188	0
LYZ_52-59	LAMP2_153-161	0.3714	0.4685	0
LYZ_69-80	LAMP2_153-161	0.2571	0.6228	0
FUCA1_114-130	LAMP2_153-161	0.4857	0.3287	0
FUCA1_163-173	LAMP2_153-161	0.6	0.208	0
FUCA1_344-354	LAMP2_153-161	0.6	0.208	0
TCN2_300-313	LAMP2_153-161	0.7714	0.0724	0
TCN2_393-399	LAMP2_153-161	-0.1429	0.7872	0
TCN2_45-59	LAMP2_153-161	0.7714	0.0724	0
TPP1_246-259	LAMP2_153-161	0.4286	0.3965	0
TPP1_507-520	LAMP2_153-161	0.7714	0.0724	0
TPP1_61-78	LAMP2_153-161	0.2571	0.6228	0
LYZ_52-59	LAMP2_281-289	0.4286	0.3965	0
LYZ_69-80	LAMP2_281-289	0.3714	0.4685	0
FUCA1_114-130	LAMP2_281-289	0.6	0.208	0
FUCA1_163-173	LAMP2_281-289	0.6571	0.1562	0
FUCA1_344-354	LAMP2_281-289	0.6571	0.1562	0
TCN2_300-313	LAMP2_281-289	0.7143	0.1108	0
TCN2_393-399	LAMP2_281-289	-0.3714	0.4685	0
TCN2_45-59	LAMP2_281-289	0.7143	0.1108	0
TPP1_246-259	LAMP2_281-289	0.5429	0.2657	0
TPP1_507-520	LAMP2_281-289	0.8286	0.0416	0
TPP1_61-78	LAMP2_281-289	0.3714	0.4685	0
Ubiquitin_12-27	LAMP2_281-289	0.8857	0.0188	0
Ubiquitin_64-72	LAMP2_281-289	0.8857	0.0188	0
FUCA1_114-130	LYZ_52-59	0.0286	0.9572	0
FUCA1_163-173	LYZ_52-59	0.0857	0.8717	0
FUCA1_344-354	LYZ_52-59	0.0857	0.8717	0
TCN2_300-313	LYZ_52-59	0.4286	0.3965	0
TCN2_393-399	LYZ_52-59	-0.3714	0.4685	0
TCN2_45-59	LYZ_52-59	0.4286	0.3965	0
TPP1_246-259	LYZ_52-59	-0.0857	0.8717	0
TPP1_507-520	LYZ_52-59	0.2571	0.6228	0
TPP1_61-78	LYZ_52-59	0.0857	0.8717	0
Ubiquitin_12-27	LYZ_52-59	0.2571	0.6228	0
Ubiquitin_64-72	LYZ_52-59	0.2571	0.6228	0
FUCA1_114-130	LYZ_69-80	0.2	0.704	0
FUCA1_163-173	LYZ_69-80	0.2571	0.6228	0
FUCA1_344-354	LYZ_69-80	0.2571	0.6228	0
TCN2_300-313	LYZ_69-80	0.4857	0.3287	0
TCN2_393-399	LYZ_69-80	-0.5429	0.2657	0
TCN2_45-59	LYZ_69-80	0.4857	0.3287	0
TPP1_246-259	LYZ_69-80	0.1429	0.7872	0
TPP1_507-520	LYZ_69-80	0.3714	0.4685	0
TPP1_61-78	LYZ_69-80	0.3143	0.5441	0
Ubiquitin_12-27	LYZ_69-80	0.0857	0.8717	0
Ubiquitin_64-72	LYZ_69-80	0.0857	0.8717	0
AP2B1_712-719	P-tau (ng/L)	0.7143	0.1108	0
AP2B1_835-842	P-tau (ng/L)	0.8286	0.0416	0
AP2B1_868-878	P-tau (ng/L)	0.8286	0.0416	0
APP_439-450	P-tau (ng/L)	0.6	0.208	0
BSA_421-433	P-tau (ng/L)	0.3714	0.4685	0
C9_146-154	P-tau (ng/L)	-0.0857	0.8717	0
C9_186-194	P-tau (ng/L)	-0.1429	0.7872	0
C9_232-242	P-tau (ng/L)	-0.1429	0.7872	0
C9_473-483	P-tau (ng/L)	-0.0857	0.8717	0
C9_497-508	P-tau (ng/L)	-0.0857	0.8717	0
CTSB_210-220	P-tau (ng/L)	0.7714	0.0724	0
CTSB_58-71	P-tau (ng/L)	0.7714	0.0724	0
CTSB_80-87	P-tau (ng/L)	0.8857	0.0188	0
CTSD_112-122	P-tau (ng/L)	0.6571	0.1562	0
CTSD_349-357	P-tau (ng/L)	0.4286	0.3965	0
CTSD_55-72	P-tau (ng/L)	0.4286	0.3965	0
CatF_103-116	P-tau (ng/L)	0.4286	0.3965	0
CatF_236-245	P-tau (ng/L)	0.3143	0.5441	0
CatF_266-278	P-tau (ng/L)	0.3143	0.5441	0
CatF_442-450	P-tau (ng/L)	0.3143	0.5441	0
CTSL_105-116	P-tau (ng/L)	0.5429	0.2657	0
CTSZ_261-270	P-tau (ng/L)	0.6	0.208	0
CTSZ_39-47	P-tau (ng/L)	0.6571	0.1562	0
DPP7_113-123	P-tau (ng/L)	0.0857	0.8717	0
DPP7_40-47	P-tau (ng/L)	-0.0286	0.9572	0
DPP7_449-462	P-tau (ng/L)	-0.0286	0.9572	0
GM2A_170-179	P-tau (ng/L)	0.7143	0.1108	0
GM2A_89-96	P-tau (ng/L)	0.5429	0.2657	0
HEXB_285-300	P-tau (ng/L)	0.4857	0.3287	0
HEXB_391-400	P-tau (ng/L)	0.4286	0.3965	0
LAMP1_138-146	P-tau (ng/L)	0.5429	0.2657	0
LAMP1_327-337	P-tau (ng/L)	0.5429	0.2657	0
LAMP1_357-363	P-tau (ng/L)	0.4286	0.3965	0
LAMP2_133-144	P-tau (ng/L)	0.8857	0.0188	0
LAMP2_145-152	P-tau (ng/L)	0.8857	0.0188	0
LAMP2_153-161	P-tau (ng/L)	0.7714	0.0724	0
LAMP2_281-289	P-tau (ng/L)	0.8857	0.0188	0
LYZ_52-59	P-tau (ng/L)	0.2571	0.6228	0
LYZ_69-80	P-tau (ng/L)	0.1429	0.7872	0
FUCA1_114-130	P-tau (ng/L)	0.4286	0.3965	0
FUCA1_163-173	P-tau (ng/L)	0.3714	0.4685	0
FUCA1_344-354	P-tau (ng/L)	0.3714	0.4685	0
TCN2_300-313	P-tau (ng/L)	0.3143	0.5441	0
TCN2_393-399	P-tau (ng/L)	-0.3143	0.5441	0
TCN2_45-59	P-tau (ng/L)	0.3143	0.5441	0
TPP1_246-259	P-tau (ng/L)	0.3143	0.5441	0
TPP1_507-520	P-tau (ng/L)	0.5429	0.2657	0
TPP1_61-78	P-tau (ng/L)	0.1429	0.7872	0
Ubiquitin_12-27	P-tau (ng/L)	0.8286	0.0416	0
Ubiquitin_64-72	P-tau (ng/L)	0.8286	0.0416	0
TCN2_300-313	FUCA1_114-130	0.5429	0.2657	0
TCN2_393-399	FUCA1_114-130	-0.7714	0.0724	0
TCN2_45-59	FUCA1_114-130	0.5429	0.2657	0
TPP1_246-259	FUCA1_114-130	0.8857	0.0188	0
TPP1_507-520	FUCA1_114-130	0.8286	0.0416	0
Ubiquitin_12-27	FUCA1_114-130	0.2571	0.6228	0
Ubiquitin_64-72	FUCA1_114-130	0.2571	0.6228	0
TCN2_300-313	FUCA1_163-173	0.7714	0.0724	0
TCN2_393-399	FUCA1_163-173	-0.6	0.208	0
TCN2_45-59	FUCA1_163-173	0.7714	0.0724	0
TPP1_61-78	FUCA1_163-173	0.8857	0.0188	0
Ubiquitin_12-27	FUCA1_163-173	0.3714	0.4685	0
Ubiquitin_64-72	FUCA1_163-173	0.3714	0.4685	0
TCN2_300-313	FUCA1_344-354	0.7714	0.0724	0
TCN2_393-399	FUCA1_344-354	-0.6	0.208	0
TCN2_45-59	FUCA1_344-354	0.7714	0.0724	0
TPP1_61-78	FUCA1_344-354	0.8857	0.0188	0
Ubiquitin_12-27	FUCA1_344-354	0.3714	0.4685	0
Ubiquitin_64-72	FUCA1_344-354	0.3714	0.4685	0
TCN2_393-399	TCN2_300-313	-0.2	0.704	0
TPP1_246-259	TCN2_300-313	0.6571	0.1562	0
TPP1_507-520	TCN2_300-313	0.8857	0.0188	0
TPP1_61-78	TCN2_300-313	0.4857	0.3287	0
Ubiquitin_12-27	TCN2_300-313	0.6	0.208	0
Ubiquitin_64-72	TCN2_300-313	0.6	0.208	0
TPP1_246-259	TCN2_393-399	-0.5429	0.2657	0
TPP1_507-520	TCN2_393-399	-0.4857	0.3287	0
TPP1_61-78	TCN2_393-399	-0.8286	0.0416	0
Ubiquitin_12-27	TCN2_393-399	0.0857	0.8717	0
Ubiquitin_64-72	TCN2_393-399	0.0857	0.8717	0
TCN2_393-399	TCN2_45-59	-0.2	0.704	0
TPP1_246-259	TCN2_45-59	0.6571	0.1562	0
TPP1_507-520	TCN2_45-59	0.8857	0.0188	0
TPP1_61-78	TCN2_45-59	0.4857	0.3287	0
Ubiquitin_12-27	TCN2_45-59	0.6	0.208	0
Ubiquitin_64-72	TCN2_45-59	0.6	0.208	0
TPP1_507-520	TPP1_246-259	0.8857	0.0188	0
Ubiquitin_12-27	TPP1_246-259	0.2571	0.6228	0
Ubiquitin_64-72	TPP1_246-259	0.2571	0.6228	0
Ubiquitin_12-27	TPP1_507-520	0.6	0.208	0
Ubiquitin_64-72	TPP1_507-520	0.6	0.208	0
TPP1_246-259	TPP1_61-78	0.8286	0.0416	0
TPP1_507-520	TPP1_61-78	0.7143	0.1108	0
Ubiquitin_12-27	TPP1_61-78	-0.0286	0.9572	0
Ubiquitin_64-72	TPP1_61-78	-0.0286	0.9572	0
AP2B1_712-719	T-tau (ng/L)	0.6	0.208	0
AP2B1_835-842	T-tau (ng/L)	0.5429	0.2657	0
AP2B1_868-878	T-tau (ng/L)	0.5429	0.2657	0
APP_289-301	T-tau (ng/L)	0.7714	0.0724	0
APP_439-450	T-tau (ng/L)	0.4857	0.3287	0
BSA_421-433	T-tau (ng/L)	0.0286	0.9572	0
C9_146-154	T-tau (ng/L)	0.1429	0.7872	0
C9_186-194	T-tau (ng/L)	0.2571	0.6228	0
C9_232-242	T-tau (ng/L)	0.2571	0.6228	0
C9_473-483	T-tau (ng/L)	0.3714	0.4685	0
C9_497-508	T-tau (ng/L)	0.3714	0.4685	0
CTSB_210-220	T-tau (ng/L)	0.7143	0.1108	0
CTSB_58-71	T-tau (ng/L)	0.7143	0.1108	0
CTSB_80-87	T-tau (ng/L)	0.7714	0.0724	0
CTSD_112-122	T-tau (ng/L)	0.6	0.208	0
CTSD_349-357	T-tau (ng/L)	0.3714	0.4685	0
CTSD_55-72	T-tau (ng/L)	0.3714	0.4685	0
CatF_103-116	T-tau (ng/L)	0.5429	0.2657	0
CatF_236-245	T-tau (ng/L)	0.3714	0.4685	0
CatF_266-278	T-tau (ng/L)	0.3714	0.4685	0
CatF_442-450	T-tau (ng/L)	0.3714	0.4685	0
CTSL_105-116	T-tau (ng/L)	0.4857	0.3287	0
CTSZ_261-270	T-tau (ng/L)	0.6571	0.1562	0
CTSZ_39-47	T-tau (ng/L)	0.6571	0.1562	0
DPP7_113-123	T-tau (ng/L)	0.3714	0.4685	0
DPP7_40-47	T-tau (ng/L)	0.2571	0.6228	0
DPP7_449-462	T-tau (ng/L)	0.2571	0.6228	0
GM2A_170-179	T-tau (ng/L)	0.6	0.208	0
GM2A_89-96	T-tau (ng/L)	0.5429	0.2657	0
HEXB_285-300	T-tau (ng/L)	0.3714	0.4685	0
HEXB_391-400	T-tau (ng/L)	0.5429	0.2657	0
LAMP1_138-146	T-tau (ng/L)	0.3714	0.4685	0
LAMP1_327-337	T-tau (ng/L)	0.4857	0.3287	0
LAMP1_357-363	T-tau (ng/L)	0.5429	0.2657	0
LAMP2_133-144	T-tau (ng/L)	0.7714	0.0724	0
LAMP2_145-152	T-tau (ng/L)	0.7714	0.0724	0
LAMP2_153-161	T-tau (ng/L)	0.6	0.208	0
LAMP2_281-289	T-tau (ng/L)	0.7714	0.0724	0
LYZ_52-59	T-tau (ng/L)	0.7714	0.0724	0
LYZ_69-80	T-tau (ng/L)	0.7143	0.1108	0
P-tau (ng/L)	T-tau (ng/L)	0.7714	0.0724	0
FUCA1_114-130	T-tau (ng/L)	0.3714	0.4685	0
FUCA1_163-173	T-tau (ng/L)	0.3143	0.5441	0
FUCA1_344-354	T-tau (ng/L)	0.3143	0.5441	0
TCN2_300-313	T-tau (ng/L)	0.3714	0.4685	0
TCN2_393-399	T-tau (ng/L)	-0.6	0.208	0
TCN2_45-59	T-tau (ng/L)	0.3714	0.4685	0
TPP1_246-259	T-tau (ng/L)	0.2	0.704	0
TPP1_507-520	T-tau (ng/L)	0.4857	0.3287	0
TPP1_61-78	T-tau (ng/L)	0.2571	0.6228	0
Ubiquitin_12-27	T-tau (ng/L)	0.5429	0.2657	0
Ubiquitin_64-72	T-tau (ng/L)	0.5429	0.2657	0

## Sheet: Clincial Study I PD
Table S4. Spearman's correlation in the PD group of Clinical Study I (N = 10).
Variable	by Variable	Spearman ρ	Prob>|ρ|	Correlation (True = 1, False = 0)
AP2B1_835-842	AP2B1_712-719	0.9515	<.0001	1
AP2B1_868-878	AP2B1_712-719	0.9879	<.0001	1
LAMP2_133-144	AP2B1_712-719	0.903	0.0003	1
LAMP2_153-161	AP2B1_712-719	0.8545	0.0016	1
LAMP2_281-289	AP2B1_712-719	0.8545	0.0016	1
Ubiquitin_12-27	AP2B1_712-719	0.9152	0.0002	1
Ubiquitin_64-72	AP2B1_712-719	0.9758	<.0001	1
AP2B1_868-878	AP2B1_835-842	0.9394	<.0001	1
LAMP2_133-144	AP2B1_835-842	0.8545	0.0016	1
LAMP2_153-161	AP2B1_835-842	0.8424	0.0022	1
Ubiquitin_64-72	AP2B1_835-842	0.8788	0.0008	1
LAMP2_133-144	AP2B1_868-878	0.8788	0.0008	1
LAMP2_281-289	AP2B1_868-878	0.8061	0.0049	1
Ubiquitin_12-27	AP2B1_868-878	0.9273	0.0001	1
Ubiquitin_64-72	AP2B1_868-878	0.9636	<.0001	1
LAMP1_138-146	APP_289-301	0.8424	0.0022	1
LAMP1_327-337	APP_289-301	0.8788	0.0008	1
LAMP2_133-144	APP_289-301	0.8788	0.0008	1
LAMP2_281-289	APP_289-301	0.8182	0.0038	1
FUCA1_163-173	Aβ1-42 (ng/L)	0.8061	0.0049	1
LYZ_52-59	BSA_421-433	-0.8182	0.0038	1
C9_186-194	C9_146-154	0.9758	<.0001	1
C9_232-242	C9_146-154	0.9879	<.0001	1
C9_473-483	C9_146-154	0.9515	<.0001	1
C9_497-508	C9_146-154	0.9515	<.0001	1
LYZ_52-59	C9_146-154	0.8667	0.0012	1
LYZ_69-80	C9_146-154	0.8909	0.0005	1
C9_232-242	C9_186-194	0.9636	<.0001	1
C9_473-483	C9_186-194	0.9273	0.0001	1
C9_497-508	C9_186-194	0.8788	0.0008	1
LYZ_52-59	C9_186-194	0.8424	0.0022	1
LYZ_69-80	C9_186-194	0.8182	0.0038	1
C9_473-483	C9_232-242	0.9394	<.0001	1
C9_497-508	C9_232-242	0.9273	0.0001	1
LYZ_52-59	C9_232-242	0.8788	0.0008	1
LYZ_69-80	C9_232-242	0.903	0.0003	1
C9_497-508	C9_473-483	0.9273	0.0001	1
LYZ_52-59	C9_473-483	0.8182	0.0038	1
LYZ_69-80	C9_473-483	0.8667	0.0012	1
LYZ_69-80	C9_497-508	0.8909	0.0005	1
LAMP1_357-363	CTSB_210-220	0.8061	0.0049	1
LAMP2_145-152	CTSB_210-220	0.9152	0.0002	1
CTSB_210-220	CTSB_58-71	0.9636	<.0001	1
CTSB_80-87	CTSB_58-71	0.9273	0.0001	1
LAMP1_357-363	CTSB_58-71	0.8424	0.0022	1
LAMP2_145-152	CTSB_58-71	0.9152	0.0002	1
CTSB_210-220	CTSB_80-87	0.9758	<.0001	1
LAMP2_145-152	CTSB_80-87	0.8303	0.0029	1
CTSD_349-357	CTSD_112-122	0.903	0.0003	1
CatF_103-116	CTSD_112-122	0.9758	<.0001	1
CatF_236-245	CTSD_112-122	0.9636	<.0001	1
CatF_266-278	CTSD_112-122	0.9636	<.0001	1
CatF_442-450	CTSD_112-122	0.9636	<.0001	1
CTSZ_39-47	CTSD_112-122	0.8182	0.0038	1
LAMP1_357-363	CTSD_112-122	0.8182	0.0038	1
TPP1_61-78	CTSD_112-122	0.8303	0.0029	1
CatF_103-116	CTSD_349-357	0.903	0.0003	1
CatF_236-245	CTSD_349-357	0.8303	0.0029	1
CatF_266-278	CTSD_349-357	0.903	0.0003	1
CatF_442-450	CTSD_349-357	0.9636	<.0001	1
GM2A_89-96	CTSD_349-357	0.8545	0.0016	1
LAMP1_357-363	CTSD_349-357	0.8545	0.0016	1
TCN2_300-313	CTSD_349-357	0.8424	0.0022	1
TCN2_45-59	CTSD_349-357	0.8667	0.0012	1
GM2A_170-179	CTSD_55-72	0.8061	0.0049	1
TPP1_61-78	CTSD_55-72	0.8061	0.0049	1
CatF_236-245	CatF_103-116	0.9394	<.0001	1
CatF_266-278	CatF_103-116	0.9758	<.0001	1
CatF_442-450	CatF_103-116	0.9636	<.0001	1
CatF_266-278	CatF_236-245	0.9273	0.0001	1
CatF_442-450	CatF_236-245	0.9152	0.0002	1
CatF_442-450	CatF_266-278	0.9758	<.0001	1
DPP7_40-47	CatF_266-278	0.8061	0.0049	1
GM2A_89-96	CatF_266-278	0.8303	0.0029	1
LAMP1_357-363	CatF_266-278	0.8182	0.0038	1
TCN2_393-399	CatF_266-278	0.8061	0.0049	1
GM2A_89-96	CatF_442-450	0.8667	0.0012	1
LAMP1_357-363	CatF_442-450	0.8788	0.0008	1
TCN2_393-399	CatF_442-450	0.8061	0.0049	1
GM2A_89-96	CTSL_105-116	0.8182	0.0038	1
LAMP1_138-146	CTSL_105-116	0.8909	0.0005	1
LAMP1_327-337	CTSL_105-116	0.9515	<.0001	1
LAMP1_357-363	CTSL_105-116	0.9636	<.0001	1
GM2A_89-96	CTSZ_261-270	0.8182	0.0038	1
LAMP1_138-146	CTSZ_261-270	0.8545	0.0016	1
LAMP1_327-337	CTSZ_261-270	0.8424	0.0022	1
LAMP1_357-363	CTSZ_261-270	0.8424	0.0022	1
TCN2_393-399	CTSZ_261-270	0.8545	0.0016	1
TPP1_61-78	CTSZ_39-47	0.9758	<.0001	1
DPP7_449-462	DPP7_40-47	0.9273	0.0001	1
GM2A_89-96	DPP7_40-47	0.8667	0.0012	1
LAMP1_327-337	DPP7_40-47	0.8303	0.0029	1
TCN2_393-399	DPP7_40-47	0.8061	0.0049	1
LAMP1_138-146	GM2A_89-96	0.8303	0.0029	1
LAMP1_327-337	GM2A_89-96	0.8424	0.0022	1
LAMP1_357-363	GM2A_89-96	0.8909	0.0005	1
TCN2_393-399	GM2A_89-96	0.8061	0.0049	1
HEXB_391-400	HEXB_285-300	0.9394	<.0001	1
TCN2_393-399	HEXB_285-300	0.8303	0.0029	1
TPP1_246-259	HEXB_285-300	0.8788	0.0008	1
TCN2_300-313	HEXB_391-400	0.8182	0.0038	1
TCN2_393-399	HEXB_391-400	0.8667	0.0012	1
TPP1_246-259	HEXB_391-400	0.8424	0.0022	1
LAMP1_327-337	LAMP1_138-146	0.9394	<.0001	1
LAMP1_357-363	LAMP1_138-146	0.903	0.0003	1
LAMP2_145-152	LAMP1_138-146	0.8061	0.0049	1
LAMP2_281-289	LAMP1_138-146	0.8424	0.0022	1
LAMP1_357-363	LAMP1_327-337	0.9152	0.0002	1
LAMP2_145-152	LAMP2_133-144	0.8061	0.0049	1
LAMP2_153-161	LAMP2_133-144	0.9273	0.0001	1
LAMP2_281-289	LAMP2_133-144	0.8667	0.0012	1
Ubiquitin_12-27	LAMP2_133-144	0.8424	0.0022	1
Ubiquitin_64-72	LAMP2_133-144	0.9152	0.0002	1
LAMP2_281-289	LAMP2_153-161	0.8424	0.0022	1
Ubiquitin_64-72	LAMP2_153-161	0.8545	0.0016	1
Ubiquitin_12-27	LAMP2_281-289	0.8303	0.0029	1
Ubiquitin_64-72	LAMP2_281-289	0.8303	0.0029	1
LYZ_69-80	LYZ_52-59	0.9515	<.0001	1
AP2B1_712-719	P-tau (ng/L)	0.8875	0.0006	1
AP2B1_835-842	P-tau (ng/L)	0.9058	0.0003	1
AP2B1_868-878	P-tau (ng/L)	0.8571	0.0015	1
LAMP2_153-161	P-tau (ng/L)	0.8146	0.0041	1
Ubiquitin_12-27	P-tau (ng/L)	0.8268	0.0032	1
Ubiquitin_64-72	P-tau (ng/L)	0.8207	0.0036	1
FUCA1_163-173	FUCA1_114-130	0.9758	<.0001	1
FUCA1_344-354	FUCA1_114-130	0.9394	<.0001	1
FUCA1_344-354	FUCA1_163-173	0.903	0.0003	1
TCN2_393-399	TCN2_300-313	0.9152	0.0002	1
TPP1_246-259	TCN2_300-313	0.8909	0.0005	1
TPP1_246-259	TCN2_393-399	0.8303	0.0029	1
TCN2_300-313	TCN2_45-59	0.9515	<.0001	1
TCN2_393-399	TCN2_45-59	0.8061	0.0049	1
TPP1_246-259	TCN2_45-59	0.8182	0.0038	1
TPP1_507-520	TPP1_246-259	0.9152	0.0002	1
P-tau (ng/L)	T-tau (ng/L)	0.8146	0.0041	1
Ubiquitin_64-72	Ubiquitin_12-27	0.9394	<.0001	1
AP2B1_712-719	Age	0.5879	0.0739	0
AP2B1_835-842	Age	0.4182	0.2291	0
AP2B1_868-878	Age	0.5394	0.1076	0
APP_289-301	Age	0.5273	0.1173	0
APP_439-450	Age	0.2121	0.5563	0
Aβ1-42 (ng/L)	Age	-0.1879	0.6032	0
BSA_421-433	Age	-0.4182	0.2291	0
C9_146-154	Age	0.1273	0.7261	0
C9_186-194	Age	0.1515	0.6761	0
C9_232-242	Age	0.2121	0.5563	0
C9_473-483	Age	0.2242	0.5334	0
C9_497-508	Age	-0.0061	0.9867	0
CTSB_210-220	Age	0.6848	0.0289	0
CTSB_58-71	Age	0.6848	0.0289	0
CTSB_80-87	Age	0.5758	0.0816	0
CTSD_112-122	Age	0.4182	0.2291	0
CTSD_349-357	Age	0.2242	0.5334	0
CTSD_55-72	Age	-0.0182	0.9602	0
CatF_103-116	Age	0.3697	0.2931	0
CatF_236-245	Age	0.4061	0.2443	0
CatF_266-278	Age	0.3818	0.2763	0
CatF_442-450	Age	0.3697	0.2931	0
CTSL_105-116	Age	0.4909	0.1497	0
CTSZ_261-270	Age	0.4788	0.1615	0
CTSZ_39-47	Age	0.5515	0.0984	0
DPP7_113-123	Age	0.503	0.1383	0
DPP7_40-47	Age	0.2364	0.5109	0
DPP7_449-462	Age	0.3455	0.3282	0
GM2A_170-179	Age	0.0909	0.8028	0
GM2A_89-96	Age	0.297	0.4047	0
HEXB_285-300	Age	0.0061	0.9867	0
HEXB_391-400	Age	-0.0424	0.9074	0
LAMP1_138-146	Age	0.6485	0.0425	0
LAMP1_327-337	Age	0.5152	0.1276	0
LAMP1_357-363	Age	0.503	0.1383	0
LAMP2_133-144	Age	0.7091	0.0217	0
LAMP2_145-152	Age	0.7091	0.0217	0
LAMP2_153-161	Age	0.697	0.0251	0
LAMP2_281-289	Age	0.6364	0.0479	0
LYZ_52-59	Age	0.1879	0.6032	0
LYZ_69-80	Age	0.103	0.777	0
P-tau (ng/L)	Age	0.4559	0.1854	0
FUCA1_114-130	Age	0.0182	0.9602	0
FUCA1_163-173	Age	-0.0667	0.8548	0
FUCA1_344-354	Age	-0.0182	0.9602	0
TCN2_300-313	Age	0.0424	0.9074	0
TCN2_393-399	Age	0.1152	0.7514	0
TCN2_45-59	Age	0.2121	0.5563	0
TPP1_246-259	Age	-0.1515	0.6761	0
TPP1_507-520	Age	-0.2727	0.4458	0
TPP1_61-78	Age	0.3939	0.26	0
T-tau (ng/L)	Age	0.3818	0.2763	0
Ubiquitin_12-27	Age	0.6848	0.0289	0
Ubiquitin_64-72	Age	0.7091	0.0217	0
APP_289-301	AP2B1_712-719	0.6727	0.033	0
APP_439-450	AP2B1_712-719	0.3818	0.2763	0
BSA_421-433	AP2B1_712-719	-0.0788	0.8287	0
C9_146-154	AP2B1_712-719	-0.0667	0.8548	0
C9_186-194	AP2B1_712-719	-0.0545	0.881	0
C9_232-242	AP2B1_712-719	-0.0788	0.8287	0
C9_473-483	AP2B1_712-719	0.0788	0.8287	0
C9_497-508	AP2B1_712-719	-0.1394	0.7009	0
CTSB_210-220	AP2B1_712-719	0.6	0.0667	0
CTSB_58-71	AP2B1_712-719	0.5394	0.1076	0
CTSB_80-87	AP2B1_712-719	0.5394	0.1076	0
CTSD_112-122	AP2B1_712-719	0.1515	0.6761	0
CTSD_349-357	AP2B1_712-719	0.0788	0.8287	0
CTSD_55-72	AP2B1_712-719	0.1273	0.7261	0
CatF_103-116	AP2B1_712-719	0.0909	0.8028	0
CatF_236-245	AP2B1_712-719	0.0545	0.881	0
CatF_266-278	AP2B1_712-719	0.103	0.777	0
CatF_442-450	AP2B1_712-719	0.1273	0.7261	0
CTSL_105-116	AP2B1_712-719	0.4424	0.2004	0
CTSZ_261-270	AP2B1_712-719	0.2485	0.4888	0
CTSZ_39-47	AP2B1_712-719	0.4061	0.2443	0
DPP7_113-123	AP2B1_712-719	-0.1273	0.7261	0
DPP7_40-47	AP2B1_712-719	0.1758	0.6272	0
DPP7_449-462	AP2B1_712-719	0.3091	0.3848	0
GM2A_170-179	AP2B1_712-719	0.4788	0.1615	0
GM2A_89-96	AP2B1_712-719	0.3697	0.2931	0
HEXB_285-300	AP2B1_712-719	0.0061	0.9867	0
HEXB_391-400	AP2B1_712-719	-0.2	0.5796	0
LAMP1_138-146	AP2B1_712-719	0.5758	0.0816	0
LAMP1_327-337	AP2B1_712-719	0.4909	0.1497	0
LAMP1_357-363	AP2B1_712-719	0.3818	0.2763	0
LAMP2_145-152	AP2B1_712-719	0.6848	0.0289	0
LYZ_52-59	AP2B1_712-719	0.1273	0.7261	0
LYZ_69-80	AP2B1_712-719	0.0182	0.9602	0
FUCA1_114-130	AP2B1_712-719	0.0667	0.8548	0
FUCA1_163-173	AP2B1_712-719	0.0667	0.8548	0
FUCA1_344-354	AP2B1_712-719	0.1273	0.7261	0
TCN2_300-313	AP2B1_712-719	-0.0788	0.8287	0
TCN2_393-399	AP2B1_712-719	-0.0667	0.8548	0
TCN2_45-59	AP2B1_712-719	-0.0182	0.9602	0
TPP1_246-259	AP2B1_712-719	-0.0909	0.8028	0
TPP1_507-520	AP2B1_712-719	-0.1636	0.6515	0
TPP1_61-78	AP2B1_712-719	0.2727	0.4458	0
APP_289-301	AP2B1_835-842	0.6364	0.0479	0
APP_439-450	AP2B1_835-842	0.3333	0.3466	0
BSA_421-433	AP2B1_835-842	0.103	0.777	0
C9_146-154	AP2B1_835-842	-0.0667	0.8548	0
C9_186-194	AP2B1_835-842	-0.0909	0.8028	0
C9_232-242	AP2B1_835-842	-0.1152	0.7514	0
C9_473-483	AP2B1_835-842	0.0545	0.881	0
C9_497-508	AP2B1_835-842	-0.0788	0.8287	0
CTSB_210-220	AP2B1_835-842	0.5152	0.1276	0
CTSB_58-71	AP2B1_835-842	0.4667	0.1739	0
CTSB_80-87	AP2B1_835-842	0.4545	0.1869	0
CTSD_112-122	AP2B1_835-842	0.0303	0.9338	0
CTSD_349-357	AP2B1_835-842	0.0061	0.9867	0
CTSD_55-72	AP2B1_835-842	0.1394	0.7009	0
CatF_103-116	AP2B1_835-842	0.0061	0.9867	0
CatF_236-245	AP2B1_835-842	-0.0545	0.881	0
CatF_266-278	AP2B1_835-842	0.0424	0.9074	0
CatF_442-450	AP2B1_835-842	0.0424	0.9074	0
CTSL_105-116	AP2B1_835-842	0.297	0.4047	0
CTSZ_261-270	AP2B1_835-842	0.2242	0.5334	0
CTSZ_39-47	AP2B1_835-842	0.2485	0.4888	0
DPP7_113-123	AP2B1_835-842	-0.2606	0.4671	0
DPP7_40-47	AP2B1_835-842	0.1394	0.7009	0
DPP7_449-462	AP2B1_835-842	0.2606	0.4671	0
GM2A_170-179	AP2B1_835-842	0.4667	0.1739	0
GM2A_89-96	AP2B1_835-842	0.3576	0.3104	0
HEXB_285-300	AP2B1_835-842	-0.0061	0.9867	0
HEXB_391-400	AP2B1_835-842	-0.2121	0.5563	0
LAMP1_138-146	AP2B1_835-842	0.4788	0.1615	0
LAMP1_327-337	AP2B1_835-842	0.3697	0.2931	0
LAMP1_357-363	AP2B1_835-842	0.2848	0.425	0
LAMP2_145-152	AP2B1_835-842	0.6606	0.0376	0
LAMP2_281-289	AP2B1_835-842	0.7697	0.0092	0
LYZ_52-59	AP2B1_835-842	0.0788	0.8287	0
LYZ_69-80	AP2B1_835-842	0.0061	0.9867	0
FUCA1_114-130	AP2B1_835-842	0.0182	0.9602	0
FUCA1_163-173	AP2B1_835-842	0.0303	0.9338	0
FUCA1_344-354	AP2B1_835-842	0.0788	0.8287	0
TCN2_300-313	AP2B1_835-842	-0.0545	0.881	0
TCN2_393-399	AP2B1_835-842	-0.0424	0.9074	0
TCN2_45-59	AP2B1_835-842	-0.0667	0.8548	0
TPP1_246-259	AP2B1_835-842	-0.103	0.777	0
TPP1_507-520	AP2B1_835-842	-0.2	0.5796	0
TPP1_61-78	AP2B1_835-842	0.1273	0.7261	0
Ubiquitin_12-27	AP2B1_835-842	0.7939	0.0061	0
APP_289-301	AP2B1_868-878	0.6242	0.0537	0
APP_439-450	AP2B1_868-878	0.3455	0.3282	0
BSA_421-433	AP2B1_868-878	-0.0909	0.8028	0
C9_146-154	AP2B1_868-878	-0.0424	0.9074	0
C9_186-194	AP2B1_868-878	-0.0303	0.9338	0
C9_232-242	AP2B1_868-878	-0.0545	0.881	0
C9_473-483	AP2B1_868-878	0.103	0.777	0
C9_497-508	AP2B1_868-878	-0.103	0.777	0
CTSB_210-220	AP2B1_868-878	0.5758	0.0816	0
CTSB_58-71	AP2B1_868-878	0.503	0.1383	0
CTSB_80-87	AP2B1_868-878	0.5273	0.1173	0
CTSD_112-122	AP2B1_868-878	0.1152	0.7514	0
CTSD_349-357	AP2B1_868-878	0.0424	0.9074	0
CTSD_55-72	AP2B1_868-878	0.103	0.777	0
CatF_103-116	AP2B1_868-878	0.0424	0.9074	0
CatF_236-245	AP2B1_868-878	0.0424	0.9074	0
CatF_266-278	AP2B1_868-878	0.0424	0.9074	0
CatF_442-450	AP2B1_868-878	0.0788	0.8287	0
CTSL_105-116	AP2B1_868-878	0.4182	0.2291	0
CTSZ_261-270	AP2B1_868-878	0.1636	0.6515	0
CTSZ_39-47	AP2B1_868-878	0.3576	0.3104	0
DPP7_113-123	AP2B1_868-878	-0.2242	0.5334	0
DPP7_40-47	AP2B1_868-878	0.0909	0.8028	0
DPP7_449-462	AP2B1_868-878	0.2242	0.5334	0
GM2A_170-179	AP2B1_868-878	0.4545	0.1869	0
GM2A_89-96	AP2B1_868-878	0.297	0.4047	0
HEXB_285-300	AP2B1_868-878	-0.0788	0.8287	0
HEXB_391-400	AP2B1_868-878	-0.2606	0.4671	0
LAMP1_138-146	AP2B1_868-878	0.5273	0.1173	0
LAMP1_327-337	AP2B1_868-878	0.4424	0.2004	0
LAMP1_357-363	AP2B1_868-878	0.3455	0.3282	0
LAMP2_145-152	AP2B1_868-878	0.6485	0.0425	0
LAMP2_153-161	AP2B1_868-878	0.7939	0.0061	0
LYZ_52-59	AP2B1_868-878	0.1515	0.6761	0
LYZ_69-80	AP2B1_868-878	0.0545	0.881	0
FUCA1_114-130	AP2B1_868-878	0.1273	0.7261	0
FUCA1_163-173	AP2B1_868-878	0.1273	0.7261	0
FUCA1_344-354	AP2B1_868-878	0.1758	0.6272	0
TCN2_300-313	AP2B1_868-878	-0.1394	0.7009	0
TCN2_393-399	AP2B1_868-878	-0.1273	0.7261	0
TCN2_45-59	AP2B1_868-878	-0.0788	0.8287	0
TPP1_246-259	AP2B1_868-878	-0.1515	0.6761	0
TPP1_507-520	AP2B1_868-878	-0.2121	0.5563	0
TPP1_61-78	AP2B1_868-878	0.2242	0.5334	0
APP_439-450	APP_289-301	0.7697	0.0092	0
BSA_421-433	APP_289-301	0.2242	0.5334	0
C9_146-154	APP_289-301	-0.3939	0.26	0
C9_186-194	APP_289-301	-0.4424	0.2004	0
C9_232-242	APP_289-301	-0.3576	0.3104	0
C9_473-483	APP_289-301	-0.2485	0.4888	0
C9_497-508	APP_289-301	-0.3455	0.3282	0
CTSB_210-220	APP_289-301	0.5636	0.0897	0
CTSB_58-71	APP_289-301	0.5515	0.0984	0
CTSB_80-87	APP_289-301	0.4182	0.2291	0
CTSD_112-122	APP_289-301	0.4182	0.2291	0
CTSD_349-357	APP_289-301	0.3576	0.3104	0
CTSD_55-72	APP_289-301	0.4667	0.1739	0
CatF_103-116	APP_289-301	0.3333	0.3466	0
CatF_236-245	APP_289-301	0.3697	0.2931	0
CatF_266-278	APP_289-301	0.4667	0.1739	0
CatF_442-450	APP_289-301	0.4667	0.1739	0
CTSL_105-116	APP_289-301	0.7576	0.0111	0
CTSZ_261-270	APP_289-301	0.7818	0.0075	0
CTSZ_39-47	APP_289-301	0.5879	0.0739	0
DPP7_113-123	APP_289-301	0.4061	0.2443	0
DPP7_40-47	APP_289-301	0.7091	0.0217	0
DPP7_449-462	APP_289-301	0.6848	0.0289	0
GM2A_170-179	APP_289-301	0.6121	0.06	0
GM2A_89-96	APP_289-301	0.697	0.0251	0
HEXB_285-300	APP_289-301	0.503	0.1383	0
HEXB_391-400	APP_289-301	0.3576	0.3104	0
LAMP1_357-363	APP_289-301	0.7333	0.0158	0
LAMP2_145-152	APP_289-301	0.7576	0.0111	0
LAMP2_153-161	APP_289-301	0.7818	0.0075	0
LYZ_52-59	APP_289-301	-0.1152	0.7514	0
LYZ_69-80	APP_289-301	-0.1273	0.7261	0
FUCA1_114-130	APP_289-301	-0.3697	0.2931	0
FUCA1_163-173	APP_289-301	-0.297	0.4047	0
FUCA1_344-354	APP_289-301	-0.3697	0.2931	0
TCN2_300-313	APP_289-301	0.3333	0.3466	0
TCN2_393-399	APP_289-301	0.5394	0.1076	0
TCN2_45-59	APP_289-301	0.2606	0.4671	0
TPP1_246-259	APP_289-301	0.3455	0.3282	0
TPP1_507-520	APP_289-301	0.0545	0.881	0
TPP1_61-78	APP_289-301	0.4667	0.1739	0
Ubiquitin_12-27	APP_289-301	0.5758	0.0816	0
Ubiquitin_64-72	APP_289-301	0.6727	0.033	0
BSA_421-433	APP_439-450	0.503	0.1383	0
C9_146-154	APP_439-450	-0.6848	0.0289	0
C9_186-194	APP_439-450	-0.7576	0.0111	0
C9_232-242	APP_439-450	-0.6364	0.0479	0
C9_473-483	APP_439-450	-0.5152	0.1276	0
C9_497-508	APP_439-450	-0.5879	0.0739	0
CTSB_210-220	APP_439-450	0.0788	0.8287	0
CTSB_58-71	APP_439-450	0.0788	0.8287	0
CTSB_80-87	APP_439-450	-0.0182	0.9602	0
CTSD_112-122	APP_439-450	0.1515	0.6761	0
CTSD_349-357	APP_439-450	0.1152	0.7514	0
CTSD_55-72	APP_439-450	0.297	0.4047	0
CatF_103-116	APP_439-450	0.0788	0.8287	0
CatF_236-245	APP_439-450	0.1394	0.7009	0
CatF_266-278	APP_439-450	0.1879	0.6032	0
CatF_442-450	APP_439-450	0.1879	0.6032	0
CTSL_105-116	APP_439-450	0.503	0.1383	0
CTSZ_261-270	APP_439-450	0.5515	0.0984	0
CTSZ_39-47	APP_439-450	0.2848	0.425	0
DPP7_113-123	APP_439-450	0.3212	0.3655	0
DPP7_40-47	APP_439-450	0.5758	0.0816	0
DPP7_449-462	APP_439-450	0.5879	0.0739	0
GM2A_170-179	APP_439-450	0.3212	0.3655	0
GM2A_89-96	APP_439-450	0.3697	0.2931	0
HEXB_285-300	APP_439-450	0.6242	0.0537	0
HEXB_391-400	APP_439-450	0.5758	0.0816	0
LAMP1_138-146	APP_439-450	0.5273	0.1173	0
LAMP1_327-337	APP_439-450	0.6727	0.033	0
LAMP1_357-363	APP_439-450	0.3818	0.2763	0
LAMP2_133-144	APP_439-450	0.5515	0.0984	0
LAMP2_145-152	APP_439-450	0.2848	0.425	0
LAMP2_153-161	APP_439-450	0.5152	0.1276	0
LAMP2_281-289	APP_439-450	0.5879	0.0739	0
LYZ_52-59	APP_439-450	-0.4424	0.2004	0
LYZ_69-80	APP_439-450	-0.3818	0.2763	0
FUCA1_114-130	APP_439-450	-0.2606	0.4671	0
FUCA1_163-173	APP_439-450	-0.1879	0.6032	0
FUCA1_344-354	APP_439-450	-0.297	0.4047	0
TCN2_300-313	APP_439-450	0.2727	0.4458	0
TCN2_393-399	APP_439-450	0.4545	0.1869	0
TCN2_45-59	APP_439-450	0.2	0.5796	0
TPP1_246-259	APP_439-450	0.3818	0.2763	0
TPP1_507-520	APP_439-450	0.1273	0.7261	0
TPP1_61-78	APP_439-450	0.2364	0.5109	0
Ubiquitin_12-27	APP_439-450	0.3455	0.3282	0
Ubiquitin_64-72	APP_439-450	0.4061	0.2443	0
AP2B1_712-719	Aβ1-42 (ng/L)	0.3091	0.3848	0
AP2B1_835-842	Aβ1-42 (ng/L)	0.297	0.4047	0
AP2B1_868-878	Aβ1-42 (ng/L)	0.3818	0.2763	0
APP_289-301	Aβ1-42 (ng/L)	-0.1758	0.6272	0
APP_439-450	Aβ1-42 (ng/L)	0.0545	0.881	0
BSA_421-433	Aβ1-42 (ng/L)	0.1636	0.6515	0
C9_146-154	Aβ1-42 (ng/L)	-0.1273	0.7261	0
C9_186-194	Aβ1-42 (ng/L)	-0.0667	0.8548	0
C9_232-242	Aβ1-42 (ng/L)	-0.1879	0.6032	0
C9_473-483	Aβ1-42 (ng/L)	0.0424	0.9074	0
C9_497-508	Aβ1-42 (ng/L)	-0.1273	0.7261	0
CTSB_210-220	Aβ1-42 (ng/L)	-0.0424	0.9074	0
CTSB_58-71	Aβ1-42 (ng/L)	-0.2242	0.5334	0
CTSB_80-87	Aβ1-42 (ng/L)	0.0909	0.8028	0
CTSD_112-122	Aβ1-42 (ng/L)	-0.2848	0.425	0
CTSD_349-357	Aβ1-42 (ng/L)	-0.3576	0.3104	0
CTSD_55-72	Aβ1-42 (ng/L)	0.0667	0.8548	0
CatF_103-116	Aβ1-42 (ng/L)	-0.3576	0.3104	0
CatF_236-245	Aβ1-42 (ng/L)	-0.297	0.4047	0
CatF_266-278	Aβ1-42 (ng/L)	-0.4303	0.2145	0
CatF_442-450	Aβ1-42 (ng/L)	-0.4424	0.2004	0
CTSL_105-116	Aβ1-42 (ng/L)	-0.2242	0.5334	0
CTSZ_261-270	Aβ1-42 (ng/L)	-0.5758	0.0816	0
CTSZ_39-47	Aβ1-42 (ng/L)	-0.0182	0.9602	0
DPP7_113-123	Aβ1-42 (ng/L)	-0.6485	0.0425	0
DPP7_40-47	Aβ1-42 (ng/L)	-0.5152	0.1276	0
DPP7_449-462	Aβ1-42 (ng/L)	-0.3091	0.3848	0
GM2A_170-179	Aβ1-42 (ng/L)	0.0667	0.8548	0
GM2A_89-96	Aβ1-42 (ng/L)	-0.4303	0.2145	0
HEXB_285-300	Aβ1-42 (ng/L)	-0.1394	0.7009	0
HEXB_391-400	Aβ1-42 (ng/L)	-0.1879	0.6032	0
LAMP1_138-146	Aβ1-42 (ng/L)	-0.4182	0.2291	0
LAMP1_327-337	Aβ1-42 (ng/L)	-0.3212	0.3655	0
LAMP1_357-363	Aβ1-42 (ng/L)	-0.3697	0.2931	0
LAMP2_133-144	Aβ1-42 (ng/L)	0.0182	0.9602	0
LAMP2_145-152	Aβ1-42 (ng/L)	-0.1636	0.6515	0
LAMP2_153-161	Aβ1-42 (ng/L)	-0.0788	0.8287	0
LAMP2_281-289	Aβ1-42 (ng/L)	-0.0303	0.9338	0
LYZ_52-59	Aβ1-42 (ng/L)	-0.1515	0.6761	0
LYZ_69-80	Aβ1-42 (ng/L)	-0.1758	0.6272	0
P-tau (ng/L)	Aβ1-42 (ng/L)	0.0608	0.8675	0
FUCA1_114-130	Aβ1-42 (ng/L)	0.7576	0.0111	0
FUCA1_344-354	Aβ1-42 (ng/L)	0.7091	0.0217	0
TCN2_300-313	Aβ1-42 (ng/L)	-0.4303	0.2145	0
TCN2_393-399	Aβ1-42 (ng/L)	-0.4909	0.1497	0
TCN2_45-59	Aβ1-42 (ng/L)	-0.4061	0.2443	0
TPP1_246-259	Aβ1-42 (ng/L)	-0.2727	0.4458	0
TPP1_507-520	Aβ1-42 (ng/L)	-0.0424	0.9074	0
TPP1_61-78	Aβ1-42 (ng/L)	0.0303	0.9338	0
T-tau (ng/L)	Aβ1-42 (ng/L)	-0.2242	0.5334	0
Ubiquitin_12-27	Aβ1-42 (ng/L)	0.2242	0.5334	0
Ubiquitin_64-72	Aβ1-42 (ng/L)	0.297	0.4047	0
C9_146-154	BSA_421-433	-0.7091	0.0217	0
C9_186-194	BSA_421-433	-0.7818	0.0075	0
C9_232-242	BSA_421-433	-0.7697	0.0092	0
C9_473-483	BSA_421-433	-0.6364	0.0479	0
C9_497-508	BSA_421-433	-0.4909	0.1497	0
CTSB_210-220	BSA_421-433	-0.4788	0.1615	0
CTSB_58-71	BSA_421-433	-0.5394	0.1076	0
CTSB_80-87	BSA_421-433	-0.5394	0.1076	0
CTSD_112-122	BSA_421-433	-0.3818	0.2763	0
CTSD_349-357	BSA_421-433	-0.4424	0.2004	0
CTSD_55-72	BSA_421-433	0.0909	0.8028	0
CatF_103-116	BSA_421-433	-0.3697	0.2931	0
CatF_236-245	BSA_421-433	-0.3212	0.3655	0
CatF_266-278	BSA_421-433	-0.2485	0.4888	0
CatF_442-450	BSA_421-433	-0.3697	0.2931	0
CTSL_105-116	BSA_421-433	-0.3091	0.3848	0
CTSZ_261-270	BSA_421-433	-0.0061	0.9867	0
CTSZ_39-47	BSA_421-433	-0.2606	0.4671	0
DPP7_113-123	BSA_421-433	-0.2121	0.5563	0
DPP7_40-47	BSA_421-433	0.1273	0.7261	0
DPP7_449-462	BSA_421-433	0.1879	0.6032	0
GM2A_170-179	BSA_421-433	0.0303	0.9338	0
GM2A_89-96	BSA_421-433	-0.1515	0.6761	0
HEXB_285-300	BSA_421-433	0.2485	0.4888	0
HEXB_391-400	BSA_421-433	0.2121	0.5563	0
LAMP1_138-146	BSA_421-433	-0.2606	0.4671	0
LAMP1_327-337	BSA_421-433	-0.1152	0.7514	0
LAMP1_357-363	BSA_421-433	-0.3212	0.3655	0
LAMP2_133-144	BSA_421-433	0.0424	0.9074	0
LAMP2_145-152	BSA_421-433	-0.2242	0.5334	0
LAMP2_153-161	BSA_421-433	0.1152	0.7514	0
LAMP2_281-289	BSA_421-433	-0.1515	0.6761	0
LYZ_69-80	BSA_421-433	-0.6727	0.033	0
FUCA1_114-130	BSA_421-433	-0.2727	0.4458	0
FUCA1_163-173	BSA_421-433	-0.1515	0.6761	0
FUCA1_344-354	BSA_421-433	-0.3939	0.26	0
TCN2_300-313	BSA_421-433	-0.1515	0.6761	0
TCN2_393-399	BSA_421-433	0.0788	0.8287	0
TCN2_45-59	BSA_421-433	-0.3939	0.26	0
TPP1_246-259	BSA_421-433	-0.0424	0.9074	0
TPP1_507-520	BSA_421-433	-0.1879	0.6032	0
TPP1_61-78	BSA_421-433	-0.2485	0.4888	0
Ubiquitin_12-27	BSA_421-433	-0.3091	0.3848	0
Ubiquitin_64-72	BSA_421-433	-0.1273	0.7261	0
CTSB_210-220	C9_146-154	0.3576	0.3104	0
CTSB_58-71	C9_146-154	0.4303	0.2145	0
CTSB_80-87	C9_146-154	0.4303	0.2145	0
CTSD_112-122	C9_146-154	0.4061	0.2443	0
CTSD_349-357	C9_146-154	0.4667	0.1739	0
CTSD_55-72	C9_146-154	0.0061	0.9867	0
CatF_103-116	C9_146-154	0.503	0.1383	0
CatF_236-245	C9_146-154	0.4182	0.2291	0
CatF_266-278	C9_146-154	0.3697	0.2931	0
CatF_442-450	C9_146-154	0.4061	0.2443	0
CTSL_105-116	C9_146-154	0.0061	0.9867	0
CTSZ_261-270	C9_146-154	-0.1273	0.7261	0
CTSZ_39-47	C9_146-154	0.0424	0.9074	0
DPP7_113-123	C9_146-154	0.0303	0.9338	0
DPP7_40-47	C9_146-154	-0.1394	0.7009	0
DPP7_449-462	C9_146-154	-0.1152	0.7514	0
GM2A_170-179	C9_146-154	0.0303	0.9338	0
GM2A_89-96	C9_146-154	0.1515	0.6761	0
HEXB_285-300	C9_146-154	-0.2485	0.4888	0
HEXB_391-400	C9_146-154	-0.1636	0.6515	0
LAMP1_138-146	C9_146-154	0.0303	0.9338	0
LAMP1_327-337	C9_146-154	-0.1636	0.6515	0
LAMP1_357-363	C9_146-154	0.1515	0.6761	0
LAMP2_133-144	C9_146-154	-0.1879	0.6032	0
LAMP2_145-152	C9_146-154	0.1273	0.7261	0
LAMP2_153-161	C9_146-154	-0.2242	0.5334	0
LAMP2_281-289	C9_146-154	-0.1636	0.6515	0
FUCA1_114-130	C9_146-154	0.3091	0.3848	0
FUCA1_163-173	C9_146-154	0.1879	0.6032	0
FUCA1_344-354	C9_146-154	0.4909	0.1497	0
TCN2_300-313	C9_146-154	0.2606	0.4671	0
TCN2_393-399	C9_146-154	0.0424	0.9074	0
TCN2_45-59	C9_146-154	0.3939	0.26	0
TPP1_246-259	C9_146-154	0.0061	0.9867	0
TPP1_507-520	C9_146-154	0.1394	0.7009	0
TPP1_61-78	C9_146-154	0.0788	0.8287	0
Ubiquitin_12-27	C9_146-154	0.0788	0.8287	0
Ubiquitin_64-72	C9_146-154	-0.0667	0.8548	0
CTSB_210-220	C9_186-194	0.3697	0.2931	0
CTSB_58-71	C9_186-194	0.4061	0.2443	0
CTSB_80-87	C9_186-194	0.4545	0.1869	0
CTSD_112-122	C9_186-194	0.3939	0.26	0
CTSD_349-357	C9_186-194	0.4182	0.2291	0
CTSD_55-72	C9_186-194	-0.0061	0.9867	0
CatF_103-116	C9_186-194	0.4667	0.1739	0
CatF_236-245	C9_186-194	0.3818	0.2763	0
CatF_266-278	C9_186-194	0.3212	0.3655	0
CatF_442-450	C9_186-194	0.3576	0.3104	0
CTSL_105-116	C9_186-194	-0.0061	0.9867	0
CTSZ_261-270	C9_186-194	-0.2121	0.5563	0
CTSZ_39-47	C9_186-194	0.1152	0.7514	0
DPP7_113-123	C9_186-194	0.0061	0.9867	0
DPP7_40-47	C9_186-194	-0.2	0.5796	0
DPP7_449-462	C9_186-194	-0.1636	0.6515	0
GM2A_170-179	C9_186-194	0.0424	0.9074	0
GM2A_89-96	C9_186-194	0.0909	0.8028	0
HEXB_285-300	C9_186-194	-0.3091	0.3848	0
HEXB_391-400	C9_186-194	-0.2606	0.4671	0
LAMP1_138-146	C9_186-194	-0.0303	0.9338	0
LAMP1_327-337	C9_186-194	-0.2	0.5796	0
LAMP1_357-363	C9_186-194	0.1152	0.7514	0
LAMP2_133-144	C9_186-194	-0.2121	0.5563	0
LAMP2_145-152	C9_186-194	0.0909	0.8028	0
LAMP2_153-161	C9_186-194	-0.2606	0.4671	0
LAMP2_281-289	C9_186-194	-0.1879	0.6032	0
FUCA1_114-130	C9_186-194	0.3576	0.3104	0
FUCA1_163-173	C9_186-194	0.2485	0.4888	0
FUCA1_344-354	C9_186-194	0.5273	0.1173	0
TCN2_300-313	C9_186-194	0.1394	0.7009	0
TCN2_393-399	C9_186-194	-0.0788	0.8287	0
TCN2_45-59	C9_186-194	0.297	0.4047	0
TPP1_246-259	C9_186-194	-0.0545	0.881	0
TPP1_507-520	C9_186-194	0.1394	0.7009	0
TPP1_61-78	C9_186-194	0.1515	0.6761	0
Ubiquitin_12-27	C9_186-194	0.0788	0.8287	0
Ubiquitin_64-72	C9_186-194	-0.0424	0.9074	0
CTSB_210-220	C9_232-242	0.3818	0.2763	0
CTSB_58-71	C9_232-242	0.4667	0.1739	0
CTSB_80-87	C9_232-242	0.4424	0.2004	0
CTSD_112-122	C9_232-242	0.4545	0.1869	0
CTSD_349-357	C9_232-242	0.503	0.1383	0
CTSD_55-72	C9_232-242	-0.0182	0.9602	0
CatF_103-116	C9_232-242	0.5394	0.1076	0
CatF_236-245	C9_232-242	0.4788	0.1615	0
CatF_266-278	C9_232-242	0.4061	0.2443	0
CatF_442-450	C9_232-242	0.4545	0.1869	0
CTSL_105-116	C9_232-242	0.0788	0.8287	0
CTSZ_261-270	C9_232-242	-0.0667	0.8548	0
CTSZ_39-47	C9_232-242	0.0788	0.8287	0
DPP7_113-123	C9_232-242	0.1273	0.7261	0
DPP7_40-47	C9_232-242	-0.103	0.777	0
DPP7_449-462	C9_232-242	-0.0909	0.8028	0
GM2A_170-179	C9_232-242	-0.0061	0.9867	0
GM2A_89-96	C9_232-242	0.1636	0.6515	0
HEXB_285-300	C9_232-242	-0.2364	0.5109	0
HEXB_391-400	C9_232-242	-0.1273	0.7261	0
LAMP1_138-146	C9_232-242	0.103	0.777	0
LAMP1_327-337	C9_232-242	-0.0909	0.8028	0
LAMP1_357-363	C9_232-242	0.2121	0.5563	0
LAMP2_133-144	C9_232-242	-0.1636	0.6515	0
LAMP2_145-152	C9_232-242	0.1515	0.6761	0
LAMP2_153-161	C9_232-242	-0.2121	0.5563	0
LAMP2_281-289	C9_232-242	-0.1273	0.7261	0
FUCA1_114-130	C9_232-242	0.2848	0.425	0
FUCA1_163-173	C9_232-242	0.1515	0.6761	0
FUCA1_344-354	C9_232-242	0.4545	0.1869	0
TCN2_300-313	C9_232-242	0.2848	0.425	0
TCN2_393-399	C9_232-242	0.0788	0.8287	0
TCN2_45-59	C9_232-242	0.4424	0.2004	0
TPP1_246-259	C9_232-242	0.0182	0.9602	0
TPP1_507-520	C9_232-242	0.1273	0.7261	0
TPP1_61-78	C9_232-242	0.103	0.777	0
Ubiquitin_12-27	C9_232-242	0.1152	0.7514	0
Ubiquitin_64-72	C9_232-242	-0.0545	0.881	0
CTSB_210-220	C9_473-483	0.4788	0.1615	0
CTSB_58-71	C9_473-483	0.503	0.1383	0
CTSB_80-87	C9_473-483	0.5515	0.0984	0
CTSD_112-122	C9_473-483	0.5515	0.0984	0
CTSD_349-357	C9_473-483	0.5394	0.1076	0
CTSD_55-72	C9_473-483	0.1758	0.6272	0
CatF_103-116	C9_473-483	0.6242	0.0537	0
CatF_236-245	C9_473-483	0.5636	0.0897	0
CatF_266-278	C9_473-483	0.4909	0.1497	0
CatF_442-450	C9_473-483	0.503	0.1383	0
CTSL_105-116	C9_473-483	0.1273	0.7261	0
CTSZ_261-270	C9_473-483	-0.0788	0.8287	0
CTSZ_39-47	C9_473-483	0.2364	0.5109	0
DPP7_113-123	C9_473-483	0.0788	0.8287	0
DPP7_40-47	C9_473-483	-0.0424	0.9074	0
DPP7_449-462	C9_473-483	0.0545	0.881	0
GM2A_170-179	C9_473-483	0.2	0.5796	0
GM2A_89-96	C9_473-483	0.2242	0.5334	0
HEXB_285-300	C9_473-483	-0.103	0.777	0
HEXB_391-400	C9_473-483	-0.0424	0.9074	0
LAMP1_138-146	C9_473-483	0.103	0.777	0
LAMP1_327-337	C9_473-483	-0.0424	0.9074	0
LAMP1_357-363	C9_473-483	0.2485	0.4888	0
LAMP2_133-144	C9_473-483	-0.0424	0.9074	0
LAMP2_145-152	C9_473-483	0.2242	0.5334	0
LAMP2_153-161	C9_473-483	-0.1273	0.7261	0
LAMP2_281-289	C9_473-483	-0.0667	0.8548	0
FUCA1_114-130	C9_473-483	0.4303	0.2145	0
FUCA1_163-173	C9_473-483	0.3333	0.3466	0
FUCA1_344-354	C9_473-483	0.6121	0.06	0
TCN2_300-313	C9_473-483	0.2848	0.425	0
TCN2_393-399	C9_473-483	0.1152	0.7514	0
TCN2_45-59	C9_473-483	0.4182	0.2291	0
TPP1_246-259	C9_473-483	0.0545	0.881	0
TPP1_507-520	C9_473-483	0.1879	0.6032	0
TPP1_61-78	C9_473-483	0.2727	0.4458	0
Ubiquitin_12-27	C9_473-483	0.2	0.5796	0
Ubiquitin_64-72	C9_473-483	0.103	0.777	0
CTSB_210-220	C9_497-508	0.2848	0.425	0
CTSB_58-71	C9_497-508	0.3576	0.3104	0
CTSB_80-87	C9_497-508	0.3455	0.3282	0
CTSD_112-122	C9_497-508	0.4182	0.2291	0
CTSD_349-357	C9_497-508	0.4788	0.1615	0
CTSD_55-72	C9_497-508	0.103	0.777	0
CatF_103-116	C9_497-508	0.5273	0.1173	0
CatF_236-245	C9_497-508	0.4788	0.1615	0
CatF_266-278	C9_497-508	0.4182	0.2291	0
CatF_442-450	C9_497-508	0.4303	0.2145	0
CTSL_105-116	C9_497-508	-0.0182	0.9602	0
CTSZ_261-270	C9_497-508	-0.0909	0.8028	0
CTSZ_39-47	C9_497-508	-0.0182	0.9602	0
DPP7_113-123	C9_497-508	0.0061	0.9867	0
DPP7_40-47	C9_497-508	-0.0667	0.8548	0
DPP7_449-462	C9_497-508	-0.0424	0.9074	0
GM2A_170-179	C9_497-508	0.0788	0.8287	0
GM2A_89-96	C9_497-508	0.1758	0.6272	0
HEXB_285-300	C9_497-508	-0.1636	0.6515	0
HEXB_391-400	C9_497-508	-0.0424	0.9074	0
LAMP1_138-146	C9_497-508	0.0061	0.9867	0
LAMP1_327-337	C9_497-508	-0.1636	0.6515	0
LAMP1_357-363	C9_497-508	0.1515	0.6761	0
LAMP2_133-144	C9_497-508	-0.2	0.5796	0
LAMP2_145-152	C9_497-508	0.103	0.777	0
LAMP2_153-161	C9_497-508	-0.2606	0.4671	0
LAMP2_281-289	C9_497-508	-0.2485	0.4888	0
LYZ_52-59	C9_497-508	0.7818	0.0075	0
FUCA1_114-130	C9_497-508	0.2606	0.4671	0
FUCA1_163-173	C9_497-508	0.1636	0.6515	0
FUCA1_344-354	C9_497-508	0.4303	0.2145	0
TCN2_300-313	C9_497-508	0.3333	0.3466	0
TCN2_393-399	C9_497-508	0.1758	0.6272	0
TCN2_45-59	C9_497-508	0.3939	0.26	0
TPP1_246-259	C9_497-508	0.0545	0.881	0
TPP1_507-520	C9_497-508	0.1273	0.7261	0
TPP1_61-78	C9_497-508	0.0303	0.9338	0
Ubiquitin_12-27	C9_497-508	-0.0182	0.9602	0
Ubiquitin_64-72	C9_497-508	-0.1515	0.6761	0
CTSD_112-122	CTSB_210-220	0.6606	0.0376	0
CTSD_349-357	CTSB_210-220	0.6364	0.0479	0
CTSD_55-72	CTSB_210-220	0.5758	0.0816	0
CatF_103-116	CTSB_210-220	0.5879	0.0739	0
CatF_236-245	CTSB_210-220	0.5879	0.0739	0
CatF_266-278	CTSB_210-220	0.6242	0.0537	0
CatF_442-450	CTSB_210-220	0.6485	0.0425	0
CTSL_105-116	CTSB_210-220	0.7455	0.0133	0
CTSZ_261-270	CTSB_210-220	0.5879	0.0739	0
CTSZ_39-47	CTSB_210-220	0.7697	0.0092	0
DPP7_113-123	CTSB_210-220	0.3697	0.2931	0
DPP7_40-47	CTSB_210-220	0.3333	0.3466	0
DPP7_449-462	CTSB_210-220	0.3212	0.3655	0
GM2A_170-179	CTSB_210-220	0.5636	0.0897	0
GM2A_89-96	CTSB_210-220	0.6485	0.0425	0
HEXB_285-300	CTSB_210-220	0.2727	0.4458	0
HEXB_391-400	CTSB_210-220	0.1758	0.6272	0
LAMP1_138-146	CTSB_210-220	0.7091	0.0217	0
LAMP1_327-337	CTSB_210-220	0.6242	0.0537	0
LAMP2_133-144	CTSB_210-220	0.6364	0.0479	0
LAMP2_153-161	CTSB_210-220	0.4667	0.1739	0
LAMP2_281-289	CTSB_210-220	0.6364	0.0479	0
LYZ_52-59	CTSB_210-220	0.5636	0.0897	0
LYZ_69-80	CTSB_210-220	0.4667	0.1739	0
FUCA1_114-130	CTSB_210-220	0.2485	0.4888	0
FUCA1_163-173	CTSB_210-220	0.2485	0.4888	0
FUCA1_344-354	CTSB_210-220	0.297	0.4047	0
TCN2_300-313	CTSB_210-220	0.4182	0.2291	0
TCN2_393-399	CTSB_210-220	0.4182	0.2291	0
TCN2_45-59	CTSB_210-220	0.4788	0.1615	0
TPP1_246-259	CTSB_210-220	0.2848	0.425	0
TPP1_507-520	CTSB_210-220	0.2242	0.5334	0
TPP1_61-78	CTSB_210-220	0.697	0.0251	0
Ubiquitin_12-27	CTSB_210-220	0.5636	0.0897	0
Ubiquitin_64-72	CTSB_210-220	0.6121	0.06	0
CTSD_112-122	CTSB_58-71	0.6606	0.0376	0
CTSD_349-357	CTSB_58-71	0.7091	0.0217	0
CTSD_55-72	CTSB_58-71	0.4909	0.1497	0
CatF_103-116	CTSB_58-71	0.6242	0.0537	0
CatF_236-245	CTSB_58-71	0.5879	0.0739	0
CatF_266-278	CTSB_58-71	0.6606	0.0376	0
CatF_442-450	CTSB_58-71	0.7091	0.0217	0
CTSL_105-116	CTSB_58-71	0.7576	0.0111	0
CTSZ_261-270	CTSB_58-71	0.6848	0.0289	0
CTSZ_39-47	CTSB_58-71	0.6606	0.0376	0
DPP7_113-123	CTSB_58-71	0.4545	0.1869	0
DPP7_40-47	CTSB_58-71	0.3939	0.26	0
DPP7_449-462	CTSB_58-71	0.3333	0.3466	0
GM2A_170-179	CTSB_58-71	0.4788	0.1615	0
GM2A_89-96	CTSB_58-71	0.7212	0.0186	0
HEXB_285-300	CTSB_58-71	0.297	0.4047	0
HEXB_391-400	CTSB_58-71	0.2364	0.5109	0
LAMP1_138-146	CTSB_58-71	0.7939	0.0061	0
LAMP1_327-337	CTSB_58-71	0.6606	0.0376	0
LAMP2_133-144	CTSB_58-71	0.6	0.0667	0
LAMP2_153-161	CTSB_58-71	0.4788	0.1615	0
LAMP2_281-289	CTSB_58-71	0.6727	0.033	0
LYZ_52-59	CTSB_58-71	0.6606	0.0376	0
LYZ_69-80	CTSB_58-71	0.5758	0.0816	0
FUCA1_114-130	CTSB_58-71	0.1273	0.7261	0
FUCA1_163-173	CTSB_58-71	0.0909	0.8028	0
FUCA1_344-354	CTSB_58-71	0.2121	0.5563	0
TCN2_300-313	CTSB_58-71	0.5636	0.0897	0
TCN2_393-399	CTSB_58-71	0.5152	0.1276	0
TCN2_45-59	CTSB_58-71	0.6364	0.0479	0
TPP1_246-259	CTSB_58-71	0.3697	0.2931	0
TPP1_507-520	CTSB_58-71	0.2606	0.4671	0
TPP1_61-78	CTSB_58-71	0.5879	0.0739	0
Ubiquitin_12-27	CTSB_58-71	0.5515	0.0984	0
Ubiquitin_64-72	CTSB_58-71	0.5394	0.1076	0
CTSD_112-122	CTSB_80-87	0.6242	0.0537	0
CTSD_349-357	CTSB_80-87	0.6364	0.0479	0
CTSD_55-72	CTSB_80-87	0.6	0.0667	0
CatF_103-116	CTSB_80-87	0.5515	0.0984	0
CatF_236-245	CTSB_80-87	0.5394	0.1076	0
CatF_266-278	CTSB_80-87	0.5636	0.0897	0
CatF_442-450	CTSB_80-87	0.6	0.0667	0
CTSL_105-116	CTSB_80-87	0.6848	0.0289	0
CTSZ_261-270	CTSB_80-87	0.4667	0.1739	0
CTSZ_39-47	CTSB_80-87	0.7333	0.0158	0
DPP7_113-123	CTSB_80-87	0.2727	0.4458	0
DPP7_40-47	CTSB_80-87	0.2121	0.5563	0
DPP7_449-462	CTSB_80-87	0.2	0.5796	0
GM2A_170-179	CTSB_80-87	0.5394	0.1076	0
GM2A_89-96	CTSB_80-87	0.5758	0.0816	0
HEXB_285-300	CTSB_80-87	0.2606	0.4671	0
HEXB_391-400	CTSB_80-87	0.1758	0.6272	0
LAMP1_138-146	CTSB_80-87	0.5879	0.0739	0
LAMP1_327-337	CTSB_80-87	0.5152	0.1276	0
LAMP1_357-363	CTSB_80-87	0.7333	0.0158	0
LAMP2_133-144	CTSB_80-87	0.503	0.1383	0
LAMP2_153-161	CTSB_80-87	0.3212	0.3655	0
LAMP2_281-289	CTSB_80-87	0.5515	0.0984	0
LYZ_52-59	CTSB_80-87	0.6364	0.0479	0
LYZ_69-80	CTSB_80-87	0.5273	0.1173	0
FUCA1_114-130	CTSB_80-87	0.4182	0.2291	0
FUCA1_163-173	CTSB_80-87	0.4182	0.2291	0
FUCA1_344-354	CTSB_80-87	0.4788	0.1615	0
TCN2_300-313	CTSB_80-87	0.4182	0.2291	0
TCN2_393-399	CTSB_80-87	0.3576	0.3104	0
TCN2_45-59	CTSB_80-87	0.4909	0.1497	0
TPP1_246-259	CTSB_80-87	0.3091	0.3848	0
TPP1_507-520	CTSB_80-87	0.3212	0.3655	0
TPP1_61-78	CTSB_80-87	0.697	0.0251	0
Ubiquitin_12-27	CTSB_80-87	0.503	0.1383	0
Ubiquitin_64-72	CTSB_80-87	0.5394	0.1076	0
CTSL_105-116	CTSD_112-122	0.7576	0.0111	0
CTSZ_261-270	CTSD_112-122	0.5636	0.0897	0
DPP7_113-123	CTSD_112-122	0.7091	0.0217	0
DPP7_40-47	CTSD_112-122	0.7212	0.0186	0
DPP7_449-462	CTSD_112-122	0.7212	0.0186	0
GM2A_170-179	CTSD_112-122	0.6848	0.0289	0
GM2A_89-96	CTSD_112-122	0.7576	0.0111	0
HEXB_285-300	CTSD_112-122	0.5515	0.0984	0
HEXB_391-400	CTSD_112-122	0.5152	0.1276	0
LAMP1_138-146	CTSD_112-122	0.6242	0.0537	0
LAMP1_327-337	CTSD_112-122	0.6848	0.0289	0
LAMP2_133-144	CTSD_112-122	0.2848	0.425	0
LAMP2_145-152	CTSD_112-122	0.4788	0.1615	0
LAMP2_153-161	CTSD_112-122	0.103	0.777	0
LAMP2_281-289	CTSD_112-122	0.2727	0.4458	0
LYZ_52-59	CTSD_112-122	0.4909	0.1497	0
LYZ_69-80	CTSD_112-122	0.5394	0.1076	0
FUCA1_114-130	CTSD_112-122	-0.0424	0.9074	0
FUCA1_163-173	CTSD_112-122	-0.0182	0.9602	0
FUCA1_344-354	CTSD_112-122	0.1152	0.7514	0
TCN2_300-313	CTSD_112-122	0.6121	0.06	0
TCN2_393-399	CTSD_112-122	0.6848	0.0289	0
TCN2_45-59	CTSD_112-122	0.6606	0.0376	0
TPP1_246-259	CTSD_112-122	0.5758	0.0816	0
TPP1_507-520	CTSD_112-122	0.5152	0.1276	0
Ubiquitin_12-27	CTSD_112-122	0.2121	0.5563	0
Ubiquitin_64-72	CTSD_112-122	0.2242	0.5334	0
CTSL_105-116	CTSD_349-357	0.7818	0.0075	0
CTSZ_261-270	CTSD_349-357	0.6364	0.0479	0
CTSZ_39-47	CTSD_349-357	0.6485	0.0425	0
DPP7_113-123	CTSD_349-357	0.6364	0.0479	0
DPP7_40-47	CTSD_349-357	0.697	0.0251	0
DPP7_449-462	CTSD_349-357	0.5758	0.0816	0
GM2A_170-179	CTSD_349-357	0.6485	0.0425	0
HEXB_285-300	CTSD_349-357	0.6242	0.0537	0
HEXB_391-400	CTSD_349-357	0.6121	0.06	0
LAMP1_138-146	CTSD_349-357	0.6606	0.0376	0
LAMP1_327-337	CTSD_349-357	0.6848	0.0289	0
LAMP2_133-144	CTSD_349-357	0.1636	0.6515	0
LAMP2_145-152	CTSD_349-357	0.4788	0.1615	0
LAMP2_153-161	CTSD_349-357	0.0061	0.9867	0
LAMP2_281-289	CTSD_349-357	0.3212	0.3655	0
LYZ_52-59	CTSD_349-357	0.6727	0.033	0
LYZ_69-80	CTSD_349-357	0.697	0.0251	0
FUCA1_114-130	CTSD_349-357	-0.0545	0.881	0
FUCA1_163-173	CTSD_349-357	-0.0424	0.9074	0
FUCA1_344-354	CTSD_349-357	0.1515	0.6761	0
TCN2_393-399	CTSD_349-357	0.7939	0.0061	0
TPP1_246-259	CTSD_349-357	0.7939	0.0061	0
TPP1_507-520	CTSD_349-357	0.7212	0.0186	0
TPP1_61-78	CTSD_349-357	0.697	0.0251	0
Ubiquitin_12-27	CTSD_349-357	0.1394	0.7009	0
Ubiquitin_64-72	CTSD_349-357	0.0788	0.8287	0
CTSD_112-122	CTSD_55-72	0.6727	0.033	0
CTSD_349-357	CTSD_55-72	0.697	0.0251	0
CatF_103-116	CTSD_55-72	0.6	0.0667	0
CatF_236-245	CTSD_55-72	0.6	0.0667	0
CatF_266-278	CTSD_55-72	0.6848	0.0289	0
CatF_442-450	CTSD_55-72	0.6606	0.0376	0
CTSL_105-116	CTSD_55-72	0.6485	0.0425	0
CTSZ_261-270	CTSD_55-72	0.5273	0.1173	0
CTSZ_39-47	CTSD_55-72	0.7333	0.0158	0
DPP7_113-123	CTSD_55-72	0.3576	0.3104	0
DPP7_40-47	CTSD_55-72	0.5758	0.0816	0
DPP7_449-462	CTSD_55-72	0.503	0.1383	0
GM2A_89-96	CTSD_55-72	0.6848	0.0289	0
HEXB_285-300	CTSD_55-72	0.7576	0.0111	0
HEXB_391-400	CTSD_55-72	0.6606	0.0376	0
LAMP1_138-146	CTSD_55-72	0.3818	0.2763	0
LAMP1_327-337	CTSD_55-72	0.5515	0.0984	0
LAMP1_357-363	CTSD_55-72	0.6848	0.0289	0
LAMP2_133-144	CTSD_55-72	0.2	0.5796	0
LAMP2_145-152	CTSD_55-72	0.4667	0.1739	0
LAMP2_153-161	CTSD_55-72	-0.0182	0.9602	0
LAMP2_281-289	CTSD_55-72	0.2121	0.5563	0
LYZ_52-59	CTSD_55-72	0.1879	0.6032	0
LYZ_69-80	CTSD_55-72	0.2121	0.5563	0
FUCA1_114-130	CTSD_55-72	0.1515	0.6761	0
FUCA1_163-173	CTSD_55-72	0.297	0.4047	0
FUCA1_344-354	CTSD_55-72	0.2121	0.5563	0
TCN2_300-313	CTSD_55-72	0.6121	0.06	0
TCN2_393-399	CTSD_55-72	0.7091	0.0217	0
TCN2_45-59	CTSD_55-72	0.4788	0.1615	0
TPP1_246-259	CTSD_55-72	0.7212	0.0186	0
TPP1_507-520	CTSD_55-72	0.6848	0.0289	0
Ubiquitin_12-27	CTSD_55-72	-0.0545	0.881	0
Ubiquitin_64-72	CTSD_55-72	0.0909	0.8028	0
CTSL_105-116	CatF_103-116	0.6485	0.0425	0
CTSZ_261-270	CatF_103-116	0.5394	0.1076	0
CTSZ_39-47	CatF_103-116	0.7091	0.0217	0
DPP7_113-123	CatF_103-116	0.7091	0.0217	0
DPP7_40-47	CatF_103-116	0.7212	0.0186	0
DPP7_449-462	CatF_103-116	0.7333	0.0158	0
GM2A_170-179	CatF_103-116	0.6242	0.0537	0
GM2A_89-96	CatF_103-116	0.7576	0.0111	0
HEXB_285-300	CatF_103-116	0.5394	0.1076	0
HEXB_391-400	CatF_103-116	0.5152	0.1276	0
LAMP1_138-146	CatF_103-116	0.5758	0.0816	0
LAMP1_327-337	CatF_103-116	0.6	0.0667	0
LAMP1_357-363	CatF_103-116	0.7455	0.0133	0
LAMP2_133-144	CatF_103-116	0.2121	0.5563	0
LAMP2_145-152	CatF_103-116	0.4182	0.2291	0
LAMP2_153-161	CatF_103-116	0.0909	0.8028	0
LAMP2_281-289	CatF_103-116	0.2121	0.5563	0
LYZ_52-59	CatF_103-116	0.5273	0.1173	0
LYZ_69-80	CatF_103-116	0.6	0.0667	0
FUCA1_114-130	CatF_103-116	-0.0909	0.8028	0
FUCA1_163-173	CatF_103-116	-0.0909	0.8028	0
FUCA1_344-354	CatF_103-116	0.103	0.777	0
TCN2_300-313	CatF_103-116	0.6606	0.0376	0
TCN2_393-399	CatF_103-116	0.697	0.0251	0
TCN2_45-59	CatF_103-116	0.7091	0.0217	0
TPP1_246-259	CatF_103-116	0.5758	0.0816	0
TPP1_507-520	CatF_103-116	0.5152	0.1276	0
TPP1_61-78	CatF_103-116	0.7333	0.0158	0
Ubiquitin_12-27	CatF_103-116	0.1515	0.6761	0
Ubiquitin_64-72	CatF_103-116	0.1515	0.6761	0
CTSL_105-116	CatF_236-245	0.6848	0.0289	0
CTSZ_261-270	CatF_236-245	0.5152	0.1276	0
CTSZ_39-47	CatF_236-245	0.7212	0.0186	0
DPP7_113-123	CatF_236-245	0.6848	0.0289	0
DPP7_40-47	CatF_236-245	0.6485	0.0425	0
DPP7_449-462	CatF_236-245	0.6606	0.0376	0
GM2A_170-179	CatF_236-245	0.5636	0.0897	0
GM2A_89-96	CatF_236-245	0.6364	0.0479	0
HEXB_285-300	CatF_236-245	0.4545	0.1869	0
HEXB_391-400	CatF_236-245	0.4909	0.1497	0
LAMP1_138-146	CatF_236-245	0.5636	0.0897	0
LAMP1_327-337	CatF_236-245	0.6121	0.06	0
LAMP1_357-363	CatF_236-245	0.7576	0.0111	0
LAMP2_133-144	CatF_236-245	0.2485	0.4888	0
LAMP2_145-152	CatF_236-245	0.4303	0.2145	0
LAMP2_153-161	CatF_236-245	0.0424	0.9074	0
LAMP2_281-289	CatF_236-245	0.1515	0.6761	0
LYZ_52-59	CatF_236-245	0.4424	0.2004	0
LYZ_69-80	CatF_236-245	0.5515	0.0984	0
FUCA1_114-130	CatF_236-245	-0.0303	0.9338	0
FUCA1_163-173	CatF_236-245	-0.0182	0.9602	0
FUCA1_344-354	CatF_236-245	0.0788	0.8287	0
TCN2_300-313	CatF_236-245	0.5515	0.0984	0
TCN2_393-399	CatF_236-245	0.6727	0.033	0
TCN2_45-59	CatF_236-245	0.5879	0.0739	0
TPP1_246-259	CatF_236-245	0.4545	0.1869	0
TPP1_507-520	CatF_236-245	0.3576	0.3104	0
TPP1_61-78	CatF_236-245	0.7212	0.0186	0
Ubiquitin_12-27	CatF_236-245	0.1636	0.6515	0
Ubiquitin_64-72	CatF_236-245	0.1515	0.6761	0
CTSL_105-116	CatF_266-278	0.7091	0.0217	0
CTSZ_261-270	CatF_266-278	0.6848	0.0289	0
CTSZ_39-47	CatF_266-278	0.7455	0.0133	0
DPP7_113-123	CatF_266-278	0.7697	0.0092	0
DPP7_449-462	CatF_266-278	0.7818	0.0075	0
GM2A_170-179	CatF_266-278	0.6606	0.0376	0
HEXB_285-300	CatF_266-278	0.6364	0.0479	0
HEXB_391-400	CatF_266-278	0.6	0.0667	0
LAMP1_138-146	CatF_266-278	0.6485	0.0425	0
LAMP1_327-337	CatF_266-278	0.6848	0.0289	0
LAMP2_133-144	CatF_266-278	0.2848	0.425	0
LAMP2_145-152	CatF_266-278	0.5152	0.1276	0
LAMP2_153-161	CatF_266-278	0.1636	0.6515	0
LAMP2_281-289	CatF_266-278	0.2727	0.4458	0
LYZ_52-59	CatF_266-278	0.4303	0.2145	0
LYZ_69-80	CatF_266-278	0.503	0.1383	0
FUCA1_114-130	CatF_266-278	-0.1758	0.6272	0
FUCA1_163-173	CatF_266-278	-0.1515	0.6761	0
FUCA1_344-354	CatF_266-278	-0.0182	0.9602	0
TCN2_300-313	CatF_266-278	0.7212	0.0186	0
TCN2_45-59	CatF_266-278	0.7212	0.0186	0
TPP1_246-259	CatF_266-278	0.6364	0.0479	0
TPP1_507-520	CatF_266-278	0.5152	0.1276	0
TPP1_61-78	CatF_266-278	0.7576	0.0111	0
Ubiquitin_12-27	CatF_266-278	0.1152	0.7514	0
Ubiquitin_64-72	CatF_266-278	0.1515	0.6761	0
CTSL_105-116	CatF_442-450	0.7939	0.0061	0
CTSZ_261-270	CatF_442-450	0.697	0.0251	0
CTSZ_39-47	CatF_442-450	0.7212	0.0186	0
DPP7_113-123	CatF_442-450	0.7455	0.0133	0
DPP7_40-47	CatF_442-450	0.7939	0.0061	0
DPP7_449-462	CatF_442-450	0.7212	0.0186	0
GM2A_170-179	CatF_442-450	0.6606	0.0376	0
HEXB_285-300	CatF_442-450	0.6121	0.06	0
HEXB_391-400	CatF_442-450	0.5879	0.0739	0
LAMP1_138-146	CatF_442-450	0.7212	0.0186	0
LAMP1_327-337	CatF_442-450	0.7455	0.0133	0
LAMP2_133-144	CatF_442-450	0.2848	0.425	0
LAMP2_145-152	CatF_442-450	0.5273	0.1173	0
LAMP2_153-161	CatF_442-450	0.1394	0.7009	0
LAMP2_281-289	CatF_442-450	0.3455	0.3282	0
LYZ_52-59	CatF_442-450	0.5515	0.0984	0
LYZ_69-80	CatF_442-450	0.6	0.0667	0
FUCA1_114-130	CatF_442-450	-0.1758	0.6272	0
FUCA1_163-173	CatF_442-450	-0.1636	0.6515	0
FUCA1_344-354	CatF_442-450	0.0061	0.9867	0
TCN2_300-313	CatF_442-450	0.7697	0.0092	0
TCN2_45-59	CatF_442-450	0.7939	0.0061	0
TPP1_246-259	CatF_442-450	0.697	0.0251	0
TPP1_507-520	CatF_442-450	0.5758	0.0816	0
TPP1_61-78	CatF_442-450	0.7333	0.0158	0
Ubiquitin_12-27	CatF_442-450	0.1879	0.6032	0
Ubiquitin_64-72	CatF_442-450	0.1636	0.6515	0
CTSZ_261-270	CTSL_105-116	0.7697	0.0092	0
CTSZ_39-47	CTSL_105-116	0.7818	0.0075	0
DPP7_113-123	CTSL_105-116	0.5879	0.0739	0
DPP7_40-47	CTSL_105-116	0.7091	0.0217	0
DPP7_449-462	CTSL_105-116	0.5879	0.0739	0
GM2A_170-179	CTSL_105-116	0.6848	0.0289	0
HEXB_285-300	CTSL_105-116	0.5758	0.0816	0
HEXB_391-400	CTSL_105-116	0.503	0.1383	0
LAMP2_133-144	CTSL_105-116	0.5879	0.0739	0
LAMP2_145-152	CTSL_105-116	0.7091	0.0217	0
LAMP2_153-161	CTSL_105-116	0.3697	0.2931	0
LAMP2_281-289	CTSL_105-116	0.697	0.0251	0
LYZ_52-59	CTSL_105-116	0.3818	0.2763	0
LYZ_69-80	CTSL_105-116	0.3333	0.3466	0
FUCA1_114-130	CTSL_105-116	-0.1273	0.7261	0
FUCA1_163-173	CTSL_105-116	-0.0788	0.8287	0
FUCA1_344-354	CTSL_105-116	-0.0424	0.9074	0
TCN2_300-313	CTSL_105-116	0.6	0.0667	0
TCN2_393-399	CTSL_105-116	0.6727	0.033	0
TCN2_45-59	CTSL_105-116	0.6242	0.0537	0
TPP1_246-259	CTSL_105-116	0.6364	0.0479	0
TPP1_507-520	CTSL_105-116	0.4667	0.1739	0
TPP1_61-78	CTSL_105-116	0.7333	0.0158	0
Ubiquitin_12-27	CTSL_105-116	0.4909	0.1497	0
Ubiquitin_64-72	CTSL_105-116	0.4667	0.1739	0
DPP7_113-123	CTSZ_261-270	0.7576	0.0111	0
DPP7_40-47	CTSZ_261-270	0.7818	0.0075	0
DPP7_449-462	CTSZ_261-270	0.6242	0.0537	0
GM2A_170-179	CTSZ_261-270	0.4182	0.2291	0
HEXB_285-300	CTSZ_261-270	0.6848	0.0289	0
HEXB_391-400	CTSZ_261-270	0.6485	0.0425	0
LAMP2_133-144	CTSZ_261-270	0.5273	0.1173	0
LAMP2_145-152	CTSZ_261-270	0.7333	0.0158	0
LAMP2_153-161	CTSZ_261-270	0.4909	0.1497	0
LAMP2_281-289	CTSZ_261-270	0.6242	0.0537	0
LYZ_52-59	CTSZ_261-270	0.1394	0.7009	0
LYZ_69-80	CTSZ_261-270	0.1394	0.7009	0
FUCA1_114-130	CTSZ_261-270	-0.3939	0.26	0
FUCA1_163-173	CTSZ_261-270	-0.3697	0.2931	0
FUCA1_344-354	CTSZ_261-270	-0.3697	0.2931	0
TCN2_300-313	CTSZ_261-270	0.7455	0.0133	0
TCN2_45-59	CTSZ_261-270	0.6848	0.0289	0
TPP1_246-259	CTSZ_261-270	0.6364	0.0479	0
TPP1_507-520	CTSZ_261-270	0.3333	0.3466	0
TPP1_61-78	CTSZ_261-270	0.4788	0.1615	0
Ubiquitin_12-27	CTSZ_261-270	0.2121	0.5563	0
Ubiquitin_64-72	CTSZ_261-270	0.2485	0.4888	0
CTSZ_261-270	CTSZ_39-47	0.5394	0.1076	0
DPP7_113-123	CTSZ_39-47	0.5879	0.0739	0
DPP7_40-47	CTSZ_39-47	0.6	0.0667	0
DPP7_449-462	CTSZ_39-47	0.6364	0.0479	0
GM2A_170-179	CTSZ_39-47	0.7455	0.0133	0
GM2A_89-96	CTSZ_39-47	0.6485	0.0425	0
HEXB_285-300	CTSZ_39-47	0.5394	0.1076	0
HEXB_391-400	CTSZ_39-47	0.3818	0.2763	0
LAMP1_138-146	CTSZ_39-47	0.5879	0.0739	0
LAMP1_327-337	CTSZ_39-47	0.7091	0.0217	0
LAMP1_357-363	CTSZ_39-47	0.7697	0.0092	0
LAMP2_133-144	CTSZ_39-47	0.4909	0.1497	0
LAMP2_145-152	CTSZ_39-47	0.6121	0.06	0
LAMP2_153-161	CTSZ_39-47	0.297	0.4047	0
LAMP2_281-289	CTSZ_39-47	0.4545	0.1869	0
LYZ_52-59	CTSZ_39-47	0.2	0.5796	0
LYZ_69-80	CTSZ_39-47	0.1273	0.7261	0
FUCA1_114-130	CTSZ_39-47	0.0909	0.8028	0
FUCA1_163-173	CTSZ_39-47	0.1758	0.6272	0
FUCA1_344-354	CTSZ_39-47	0.1394	0.7009	0
TCN2_300-313	CTSZ_39-47	0.3333	0.3466	0
TCN2_393-399	CTSZ_39-47	0.4667	0.1739	0
TCN2_45-59	CTSZ_39-47	0.3697	0.2931	0
TPP1_246-259	CTSZ_39-47	0.4303	0.2145	0
TPP1_507-520	CTSZ_39-47	0.4182	0.2291	0
Ubiquitin_12-27	CTSZ_39-47	0.3333	0.3466	0
Ubiquitin_64-72	CTSZ_39-47	0.4788	0.1615	0
DPP7_449-462	DPP7_113-123	0.6606	0.0376	0
GM2A_170-179	DPP7_113-123	0.2121	0.5563	0
GM2A_89-96	DPP7_113-123	0.5879	0.0739	0
HEXB_285-300	DPP7_113-123	0.6242	0.0537	0
HEXB_391-400	DPP7_113-123	0.6485	0.0425	0
LAMP1_138-146	DPP7_113-123	0.5879	0.0739	0
LAMP1_327-337	DPP7_113-123	0.6364	0.0479	0
LAMP1_357-363	DPP7_113-123	0.6485	0.0425	0
LAMP2_133-144	DPP7_113-123	0.1515	0.6761	0
LAMP2_145-152	DPP7_113-123	0.3455	0.3282	0
LAMP2_153-161	DPP7_113-123	0.1515	0.6761	0
LAMP2_281-289	DPP7_113-123	0.2364	0.5109	0
LYZ_52-59	DPP7_113-123	0.103	0.777	0
LYZ_69-80	DPP7_113-123	0.1273	0.7261	0
FUCA1_114-130	DPP7_113-123	-0.3333	0.3466	0
FUCA1_163-173	DPP7_113-123	-0.3455	0.3282	0
FUCA1_344-354	DPP7_113-123	-0.297	0.4047	0
TCN2_300-313	DPP7_113-123	0.6121	0.06	0
TCN2_393-399	DPP7_113-123	0.7212	0.0186	0
TCN2_45-59	DPP7_113-123	0.6606	0.0376	0
TPP1_246-259	DPP7_113-123	0.5394	0.1076	0
TPP1_507-520	DPP7_113-123	0.3697	0.2931	0
TPP1_61-78	DPP7_113-123	0.5758	0.0816	0
Ubiquitin_12-27	DPP7_113-123	-0.0424	0.9074	0
Ubiquitin_64-72	DPP7_113-123	-0.0182	0.9602	0
DPP7_113-123	DPP7_40-47	0.7333	0.0158	0
GM2A_170-179	DPP7_40-47	0.6848	0.0289	0
HEXB_285-300	DPP7_40-47	0.7576	0.0111	0
HEXB_391-400	DPP7_40-47	0.6485	0.0425	0
LAMP1_138-146	DPP7_40-47	0.7212	0.0186	0
LAMP1_357-363	DPP7_40-47	0.7455	0.0133	0
LAMP2_133-144	DPP7_40-47	0.4061	0.2443	0
LAMP2_145-152	DPP7_40-47	0.3939	0.26	0
LAMP2_153-161	DPP7_40-47	0.3576	0.3104	0
LAMP2_281-289	DPP7_40-47	0.4424	0.2004	0
LYZ_52-59	DPP7_40-47	0.0303	0.9338	0
LYZ_69-80	DPP7_40-47	0.0909	0.8028	0
FUCA1_114-130	DPP7_40-47	-0.5879	0.0739	0
FUCA1_163-173	DPP7_40-47	-0.5152	0.1276	0
FUCA1_344-354	DPP7_40-47	-0.4424	0.2004	0
TCN2_300-313	DPP7_40-47	0.6485	0.0425	0
TCN2_45-59	DPP7_40-47	0.5758	0.0816	0
TPP1_246-259	DPP7_40-47	0.7091	0.0217	0
TPP1_507-520	DPP7_40-47	0.4788	0.1615	0
TPP1_61-78	DPP7_40-47	0.5879	0.0739	0
Ubiquitin_12-27	DPP7_40-47	0.1273	0.7261	0
Ubiquitin_64-72	DPP7_40-47	0.1879	0.6032	0
GM2A_170-179	DPP7_449-462	0.6848	0.0289	0
GM2A_89-96	DPP7_449-462	0.7455	0.0133	0
HEXB_285-300	DPP7_449-462	0.6848	0.0289	0
HEXB_391-400	DPP7_449-462	0.5515	0.0984	0
LAMP1_138-146	DPP7_449-462	0.6242	0.0537	0
LAMP1_327-337	DPP7_449-462	0.7333	0.0158	0
LAMP1_357-363	DPP7_449-462	0.6121	0.06	0
LAMP2_133-144	DPP7_449-462	0.4909	0.1497	0
LAMP2_145-152	DPP7_449-462	0.3576	0.3104	0
LAMP2_153-161	DPP7_449-462	0.4667	0.1739	0
LAMP2_281-289	DPP7_449-462	0.4303	0.2145	0
LYZ_52-59	DPP7_449-462	-0.0667	0.8548	0
LYZ_69-80	DPP7_449-462	0.0182	0.9602	0
FUCA1_114-130	DPP7_449-462	-0.4545	0.1869	0
FUCA1_163-173	DPP7_449-462	-0.3939	0.26	0
FUCA1_344-354	DPP7_449-462	-0.3091	0.3848	0
TCN2_300-313	DPP7_449-462	0.4667	0.1739	0
TCN2_393-399	DPP7_449-462	0.6485	0.0425	0
TCN2_45-59	DPP7_449-462	0.4303	0.2145	0
TPP1_246-259	DPP7_449-462	0.5152	0.1276	0
TPP1_507-520	DPP7_449-462	0.3333	0.3466	0
TPP1_61-78	DPP7_449-462	0.6121	0.06	0
Ubiquitin_12-27	DPP7_449-462	0.2485	0.4888	0
Ubiquitin_64-72	DPP7_449-462	0.3576	0.3104	0
HEXB_285-300	GM2A_170-179	0.5515	0.0984	0
HEXB_391-400	GM2A_170-179	0.3333	0.3466	0
LAMP1_138-146	GM2A_170-179	0.5273	0.1173	0
LAMP1_327-337	GM2A_170-179	0.6606	0.0376	0
LAMP1_357-363	GM2A_170-179	0.6848	0.0289	0
LAMP2_133-144	GM2A_170-179	0.4788	0.1615	0
LAMP2_145-152	GM2A_170-179	0.4788	0.1615	0
LAMP2_153-161	GM2A_170-179	0.2848	0.425	0
LAMP2_281-289	GM2A_170-179	0.4424	0.2004	0
LYZ_52-59	GM2A_170-179	0.2242	0.5334	0
LYZ_69-80	GM2A_170-179	0.2121	0.5563	0
FUCA1_114-130	GM2A_170-179	-0.1152	0.7514	0
FUCA1_163-173	GM2A_170-179	0.0182	0.9602	0
FUCA1_344-354	GM2A_170-179	0.0545	0.881	0
TCN2_300-313	GM2A_170-179	0.3939	0.26	0
TCN2_393-399	GM2A_170-179	0.4909	0.1497	0
TCN2_45-59	GM2A_170-179	0.3091	0.3848	0
TPP1_246-259	GM2A_170-179	0.5636	0.0897	0
TPP1_507-520	GM2A_170-179	0.5273	0.1173	0
TPP1_61-78	GM2A_170-179	0.7576	0.0111	0
Ubiquitin_12-27	GM2A_170-179	0.3091	0.3848	0
Ubiquitin_64-72	GM2A_170-179	0.4303	0.2145	0
GM2A_170-179	GM2A_89-96	0.7818	0.0075	0
HEXB_285-300	GM2A_89-96	0.6848	0.0289	0
HEXB_391-400	GM2A_89-96	0.5515	0.0984	0
LAMP2_133-144	GM2A_89-96	0.4909	0.1497	0
LAMP2_145-152	GM2A_89-96	0.6606	0.0376	0
LAMP2_153-161	GM2A_89-96	0.4061	0.2443	0
LAMP2_281-289	GM2A_89-96	0.6121	0.06	0
LYZ_52-59	GM2A_89-96	0.4182	0.2291	0
LYZ_69-80	GM2A_89-96	0.4061	0.2443	0
FUCA1_114-130	GM2A_89-96	-0.3576	0.3104	0
FUCA1_163-173	GM2A_89-96	-0.3091	0.3848	0
FUCA1_344-354	GM2A_89-96	-0.1636	0.6515	0
TCN2_300-313	GM2A_89-96	0.7818	0.0075	0
TCN2_45-59	GM2A_89-96	0.7333	0.0158	0
TPP1_246-259	GM2A_89-96	0.7697	0.0092	0
TPP1_507-520	GM2A_89-96	0.5879	0.0739	0
TPP1_61-78	GM2A_89-96	0.6364	0.0479	0
Ubiquitin_12-27	GM2A_89-96	0.297	0.4047	0
Ubiquitin_64-72	GM2A_89-96	0.3212	0.3655	0
LAMP1_138-146	HEXB_285-300	0.4424	0.2004	0
LAMP1_327-337	HEXB_285-300	0.6242	0.0537	0
LAMP1_357-363	HEXB_285-300	0.5758	0.0816	0
LAMP2_133-144	HEXB_285-300	0.1273	0.7261	0
LAMP2_145-152	HEXB_285-300	0.2727	0.4458	0
LAMP2_153-161	HEXB_285-300	0.0909	0.8028	0
LAMP2_281-289	HEXB_285-300	0.3091	0.3848	0
LYZ_52-59	HEXB_285-300	-0.0545	0.881	0
LYZ_69-80	HEXB_285-300	-0.0061	0.9867	0
FUCA1_114-130	HEXB_285-300	-0.103	0.777	0
FUCA1_163-173	HEXB_285-300	-0.0061	0.9867	0
FUCA1_344-354	HEXB_285-300	-0.0182	0.9602	0
TCN2_300-313	HEXB_285-300	0.7697	0.0092	0
TCN2_45-59	HEXB_285-300	0.6727	0.033	0
TPP1_507-520	HEXB_285-300	0.7576	0.0111	0
TPP1_61-78	HEXB_285-300	0.6242	0.0537	0
Ubiquitin_12-27	HEXB_285-300	-0.1152	0.7514	0
Ubiquitin_64-72	HEXB_285-300	-0.0061	0.9867	0
LAMP1_138-146	HEXB_391-400	0.3697	0.2931	0
LAMP1_327-337	HEXB_391-400	0.5273	0.1173	0
LAMP1_357-363	HEXB_391-400	0.5152	0.1276	0
LAMP2_133-144	HEXB_391-400	-0.0303	0.9338	0
LAMP2_145-152	HEXB_391-400	0.1758	0.6272	0
LAMP2_153-161	HEXB_391-400	-0.0788	0.8287	0
LAMP2_281-289	HEXB_391-400	0.1515	0.6761	0
LYZ_52-59	HEXB_391-400	-0.0061	0.9867	0
LYZ_69-80	HEXB_391-400	0.103	0.777	0
FUCA1_114-130	HEXB_391-400	-0.0303	0.9338	0
FUCA1_163-173	HEXB_391-400	0.0303	0.9338	0
FUCA1_344-354	HEXB_391-400	0.0182	0.9602	0
TCN2_45-59	HEXB_391-400	0.7333	0.0158	0
TPP1_507-520	HEXB_391-400	0.697	0.0251	0
TPP1_61-78	HEXB_391-400	0.4788	0.1615	0
Ubiquitin_12-27	HEXB_391-400	-0.2242	0.5334	0
Ubiquitin_64-72	HEXB_391-400	-0.1879	0.6032	0
LAMP2_133-144	LAMP1_138-146	0.7576	0.0111	0
LAMP2_153-161	LAMP1_138-146	0.6606	0.0376	0
LYZ_52-59	LAMP1_138-146	0.3576	0.3104	0
LYZ_69-80	LAMP1_138-146	0.3212	0.3655	0
FUCA1_114-130	LAMP1_138-146	-0.3455	0.3282	0
FUCA1_163-173	LAMP1_138-146	-0.3576	0.3104	0
FUCA1_344-354	LAMP1_138-146	-0.2485	0.4888	0
TCN2_300-313	LAMP1_138-146	0.5758	0.0816	0
TCN2_393-399	LAMP1_138-146	0.6364	0.0479	0
TCN2_45-59	LAMP1_138-146	0.6121	0.06	0
TPP1_246-259	LAMP1_138-146	0.4788	0.1615	0
TPP1_507-520	LAMP1_138-146	0.2121	0.5563	0
TPP1_61-78	LAMP1_138-146	0.4788	0.1615	0
Ubiquitin_12-27	LAMP1_138-146	0.6364	0.0479	0
Ubiquitin_64-72	LAMP1_138-146	0.5879	0.0739	0
LAMP2_133-144	LAMP1_327-337	0.6848	0.0289	0
LAMP2_145-152	LAMP1_327-337	0.6848	0.0289	0
LAMP2_153-161	LAMP1_327-337	0.5394	0.1076	0
LAMP2_281-289	LAMP1_327-337	0.7697	0.0092	0
LYZ_52-59	LAMP1_327-337	0.1879	0.6032	0
LYZ_69-80	LAMP1_327-337	0.1636	0.6515	0
FUCA1_114-130	LAMP1_327-337	-0.3455	0.3282	0
FUCA1_163-173	LAMP1_327-337	-0.297	0.4047	0
FUCA1_344-354	LAMP1_327-337	-0.2606	0.4671	0
TCN2_300-313	LAMP1_327-337	0.5758	0.0816	0
TCN2_393-399	LAMP1_327-337	0.697	0.0251	0
TCN2_45-59	LAMP1_327-337	0.5758	0.0816	0
TPP1_246-259	LAMP1_327-337	0.6121	0.06	0
TPP1_507-520	LAMP1_327-337	0.3697	0.2931	0
TPP1_61-78	LAMP1_327-337	0.6364	0.0479	0
Ubiquitin_12-27	LAMP1_327-337	0.5152	0.1276	0
Ubiquitin_64-72	LAMP1_327-337	0.5152	0.1276	0
LAMP2_133-144	LAMP1_357-363	0.5636	0.0897	0
LAMP2_145-152	LAMP1_357-363	0.7818	0.0075	0
LAMP2_153-161	LAMP1_357-363	0.3697	0.2931	0
LAMP2_281-289	LAMP1_357-363	0.6364	0.0479	0
LYZ_52-59	LAMP1_357-363	0.4667	0.1739	0
LYZ_69-80	LAMP1_357-363	0.4424	0.2004	0
FUCA1_114-130	LAMP1_357-363	-0.1758	0.6272	0
FUCA1_163-173	LAMP1_357-363	-0.1394	0.7009	0
FUCA1_344-354	LAMP1_357-363	-0.0788	0.8287	0
TCN2_300-313	LAMP1_357-363	0.697	0.0251	0
TCN2_393-399	LAMP1_357-363	0.7697	0.0092	0
TCN2_45-59	LAMP1_357-363	0.697	0.0251	0
TPP1_246-259	LAMP1_357-363	0.6485	0.0425	0
TPP1_507-520	LAMP1_357-363	0.4545	0.1869	0
TPP1_61-78	LAMP1_357-363	0.7212	0.0186	0
Ubiquitin_12-27	LAMP1_357-363	0.4061	0.2443	0
Ubiquitin_64-72	LAMP1_357-363	0.3939	0.26	0
LYZ_52-59	LAMP2_133-144	0.0061	0.9867	0
LYZ_69-80	LAMP2_133-144	-0.0424	0.9074	0
FUCA1_114-130	LAMP2_133-144	-0.1758	0.6272	0
FUCA1_163-173	LAMP2_133-144	-0.1636	0.6515	0
FUCA1_344-354	LAMP2_133-144	-0.1758	0.6272	0
TCN2_300-313	LAMP2_133-144	0.0424	0.9074	0
TCN2_393-399	LAMP2_133-144	0.1879	0.6032	0
TCN2_45-59	LAMP2_133-144	0.0545	0.881	0
TPP1_246-259	LAMP2_133-144	-0.0303	0.9338	0
TPP1_507-520	LAMP2_133-144	-0.2485	0.4888	0
TPP1_61-78	LAMP2_133-144	0.3212	0.3655	0
LAMP2_153-161	LAMP2_145-152	0.697	0.0251	0
LAMP2_281-289	LAMP2_145-152	0.7697	0.0092	0
LYZ_52-59	LAMP2_145-152	0.3576	0.3104	0
LYZ_69-80	LAMP2_145-152	0.2848	0.425	0
FUCA1_114-130	LAMP2_145-152	0.0182	0.9602	0
FUCA1_163-173	LAMP2_145-152	0.0182	0.9602	0
FUCA1_344-354	LAMP2_145-152	0.0182	0.9602	0
TCN2_300-313	LAMP2_145-152	0.4061	0.2443	0
TCN2_393-399	LAMP2_145-152	0.4667	0.1739	0
TCN2_45-59	LAMP2_145-152	0.4061	0.2443	0
TPP1_246-259	LAMP2_145-152	0.2242	0.5334	0
TPP1_507-520	LAMP2_145-152	0.0303	0.9338	0
TPP1_61-78	LAMP2_145-152	0.4909	0.1497	0
Ubiquitin_12-27	LAMP2_145-152	0.6121	0.06	0
Ubiquitin_64-72	LAMP2_145-152	0.6727	0.033	0
LYZ_52-59	LAMP2_153-161	-0.103	0.777	0
LYZ_69-80	LAMP2_153-161	-0.1636	0.6515	0
FUCA1_114-130	LAMP2_153-161	-0.2848	0.425	0
FUCA1_163-173	LAMP2_153-161	-0.3091	0.3848	0
FUCA1_344-354	LAMP2_153-161	-0.2727	0.4458	0
TCN2_300-313	LAMP2_153-161	0.0061	0.9867	0
TCN2_393-399	LAMP2_153-161	0.103	0.777	0
TCN2_45-59	LAMP2_153-161	0.0303	0.9338	0
TPP1_246-259	LAMP2_153-161	-0.103	0.777	0
TPP1_507-520	LAMP2_153-161	-0.3212	0.3655	0
TPP1_61-78	LAMP2_153-161	0.1273	0.7261	0
Ubiquitin_12-27	LAMP2_153-161	0.7697	0.0092	0
LYZ_52-59	LAMP2_281-289	0.1879	0.6032	0
LYZ_69-80	LAMP2_281-289	0.0667	0.8548	0
FUCA1_114-130	LAMP2_281-289	-0.1394	0.7009	0
FUCA1_163-173	LAMP2_281-289	-0.1515	0.6761	0
FUCA1_344-354	LAMP2_281-289	-0.0667	0.8548	0
TCN2_300-313	LAMP2_281-289	0.297	0.4047	0
TCN2_393-399	LAMP2_281-289	0.2848	0.425	0
TCN2_45-59	LAMP2_281-289	0.3576	0.3104	0
TPP1_246-259	LAMP2_281-289	0.2727	0.4458	0
TPP1_507-520	LAMP2_281-289	0.0909	0.8028	0
TPP1_61-78	LAMP2_281-289	0.3333	0.3466	0
FUCA1_114-130	LYZ_52-59	0.2606	0.4671	0
FUCA1_163-173	LYZ_52-59	0.1636	0.6515	0
FUCA1_344-354	LYZ_52-59	0.4667	0.1739	0
TCN2_300-313	LYZ_52-59	0.4788	0.1615	0
TCN2_393-399	LYZ_52-59	0.2242	0.5334	0
TCN2_45-59	LYZ_52-59	0.6121	0.06	0
TPP1_246-259	LYZ_52-59	0.297	0.4047	0
TPP1_507-520	LYZ_52-59	0.3697	0.2931	0
TPP1_61-78	LYZ_52-59	0.2242	0.5334	0
Ubiquitin_12-27	LYZ_52-59	0.2848	0.425	0
Ubiquitin_64-72	LYZ_52-59	0.0909	0.8028	0
FUCA1_114-130	LYZ_69-80	0.2242	0.5334	0
FUCA1_163-173	LYZ_69-80	0.1273	0.7261	0
FUCA1_344-354	LYZ_69-80	0.4303	0.2145	0
TCN2_300-313	LYZ_69-80	0.5394	0.1076	0
TCN2_393-399	LYZ_69-80	0.3333	0.3466	0
TCN2_45-59	LYZ_69-80	0.6364	0.0479	0
TPP1_246-259	LYZ_69-80	0.3091	0.3848	0
TPP1_507-520	LYZ_69-80	0.3333	0.3466	0
TPP1_61-78	LYZ_69-80	0.1636	0.6515	0
Ubiquitin_12-27	LYZ_69-80	0.2	0.5796	0
Ubiquitin_64-72	LYZ_69-80	-0.0061	0.9867	0
APP_289-301	P-tau (ng/L)	0.5593	0.0928	0
APP_439-450	P-tau (ng/L)	0.2371	0.5096	0
BSA_421-433	P-tau (ng/L)	-0.1337	0.7126	0
C9_146-154	P-tau (ng/L)	0.1763	0.6261	0
C9_186-194	P-tau (ng/L)	0.1337	0.7126	0
C9_232-242	P-tau (ng/L)	0.1459	0.6876	0
C9_473-483	P-tau (ng/L)	0.2492	0.4874	0
C9_497-508	P-tau (ng/L)	0.1277	0.7253	0
CTSB_210-220	P-tau (ng/L)	0.4985	0.1425	0
CTSB_58-71	P-tau (ng/L)	0.535	0.1111	0
CTSB_80-87	P-tau (ng/L)	0.4316	0.2129	0
CTSD_112-122	P-tau (ng/L)	0.1885	0.6021	0
CTSD_349-357	P-tau (ng/L)	0.2128	0.5551	0
CTSD_55-72	P-tau (ng/L)	0.0365	0.9203	0
CatF_103-116	P-tau (ng/L)	0.2188	0.5436	0
CatF_236-245	P-tau (ng/L)	0.079	0.8282	0
CatF_266-278	P-tau (ng/L)	0.2067	0.5667	0
CatF_442-450	P-tau (ng/L)	0.2432	0.4984	0
CTSL_105-116	P-tau (ng/L)	0.3526	0.3177	0
CTSZ_261-270	P-tau (ng/L)	0.2736	0.4444	0
CTSZ_39-47	P-tau (ng/L)	0.2188	0.5436	0
DPP7_113-123	P-tau (ng/L)	-0.0973	0.7892	0
DPP7_40-47	P-tau (ng/L)	0.2796	0.4339	0
DPP7_449-462	P-tau (ng/L)	0.3769	0.283	0
GM2A_170-179	P-tau (ng/L)	0.462	0.1789	0
GM2A_89-96	P-tau (ng/L)	0.5046	0.1369	0
HEXB_285-300	P-tau (ng/L)	0.0061	0.9867	0
HEXB_391-400	P-tau (ng/L)	-0.1824	0.6141	0
LAMP1_138-146	P-tau (ng/L)	0.5957	0.0692	0
LAMP1_327-337	P-tau (ng/L)	0.4377	0.2058	0
LAMP1_357-363	P-tau (ng/L)	0.3647	0.3001	0
LAMP2_133-144	P-tau (ng/L)	0.7781	0.008	0
LAMP2_145-152	P-tau (ng/L)	0.6018	0.0656	0
LAMP2_281-289	P-tau (ng/L)	0.7903	0.0065	0
LYZ_52-59	P-tau (ng/L)	0.3222	0.3639	0
LYZ_69-80	P-tau (ng/L)	0.2553	0.4765	0
FUCA1_114-130	P-tau (ng/L)	-0.1398	0.7001	0
FUCA1_163-173	P-tau (ng/L)	-0.1824	0.6141	0
FUCA1_344-354	P-tau (ng/L)	0.0365	0.9203	0
TCN2_300-313	P-tau (ng/L)	0.1155	0.7507	0
TCN2_393-399	P-tau (ng/L)	0.0426	0.9071	0
TCN2_45-59	P-tau (ng/L)	0.1702	0.6383	0
TPP1_246-259	P-tau (ng/L)	0.0243	0.9468	0
TPP1_507-520	P-tau (ng/L)	-0.0729	0.8413	0
TPP1_61-78	P-tau (ng/L)	0.1094	0.7635	0
TCN2_300-313	FUCA1_114-130	-0.1152	0.7514	0
TCN2_393-399	FUCA1_114-130	-0.2727	0.4458	0
TCN2_45-59	FUCA1_114-130	-0.0182	0.9602	0
TPP1_246-259	FUCA1_114-130	-0.1515	0.6761	0
TPP1_507-520	FUCA1_114-130	0.103	0.777	0
TPP1_61-78	FUCA1_114-130	0.1636	0.6515	0
Ubiquitin_12-27	FUCA1_114-130	0.0788	0.8287	0
Ubiquitin_64-72	FUCA1_114-130	0.0909	0.8028	0
TCN2_300-313	FUCA1_163-173	-0.1152	0.7514	0
TCN2_393-399	FUCA1_163-173	-0.2242	0.5334	0
TCN2_45-59	FUCA1_163-173	-0.0667	0.8548	0
TPP1_246-259	FUCA1_163-173	-0.0788	0.8287	0
TPP1_507-520	FUCA1_163-173	0.1758	0.6272	0
TPP1_61-78	FUCA1_163-173	0.2606	0.4671	0
Ubiquitin_12-27	FUCA1_163-173	0.0182	0.9602	0
Ubiquitin_64-72	FUCA1_163-173	0.0788	0.8287	0
TCN2_300-313	FUCA1_344-354	0.0424	0.9074	0
TCN2_393-399	FUCA1_344-354	-0.1879	0.6032	0
TCN2_45-59	FUCA1_344-354	0.1636	0.6515	0
TPP1_246-259	FUCA1_344-354	0.0182	0.9602	0
TPP1_507-520	FUCA1_344-354	0.297	0.4047	0
TPP1_61-78	FUCA1_344-354	0.2364	0.5109	0
Ubiquitin_12-27	FUCA1_344-354	0.1515	0.6761	0
Ubiquitin_64-72	FUCA1_344-354	0.1273	0.7261	0
TPP1_507-520	TCN2_300-313	0.7333	0.0158	0
TPP1_61-78	TCN2_300-313	0.4061	0.2443	0
Ubiquitin_12-27	TCN2_300-313	-0.0667	0.8548	0
Ubiquitin_64-72	TCN2_300-313	-0.1273	0.7261	0
TPP1_507-520	TCN2_393-399	0.5879	0.0739	0
TPP1_61-78	TCN2_393-399	0.503	0.1383	0
Ubiquitin_12-27	TCN2_393-399	-0.0909	0.8028	0
Ubiquitin_64-72	TCN2_393-399	-0.0788	0.8287	0
TPP1_507-520	TCN2_45-59	0.7091	0.0217	0
TPP1_61-78	TCN2_45-59	0.4303	0.2145	0
Ubiquitin_12-27	TCN2_45-59	0.0788	0.8287	0
Ubiquitin_64-72	TCN2_45-59	-0.0303	0.9338	0
Ubiquitin_12-27	TPP1_246-259	-0.1394	0.7009	0
Ubiquitin_64-72	TPP1_246-259	-0.1515	0.6761	0
Ubiquitin_12-27	TPP1_507-520	-0.2242	0.5334	0
Ubiquitin_64-72	TPP1_507-520	-0.2242	0.5334	0
TPP1_246-259	TPP1_61-78	0.5394	0.1076	0
TPP1_507-520	TPP1_61-78	0.5758	0.0816	0
Ubiquitin_12-27	TPP1_61-78	0.1879	0.6032	0
Ubiquitin_64-72	TPP1_61-78	0.3333	0.3466	0
AP2B1_712-719	T-tau (ng/L)	0.5758	0.0816	0
AP2B1_835-842	T-tau (ng/L)	0.5394	0.1076	0
AP2B1_868-878	T-tau (ng/L)	0.503	0.1383	0
APP_289-301	T-tau (ng/L)	0.3455	0.3282	0
APP_439-450	T-tau (ng/L)	0.103	0.777	0
BSA_421-433	T-tau (ng/L)	-0.2606	0.4671	0
C9_146-154	T-tau (ng/L)	0.2727	0.4458	0
C9_186-194	T-tau (ng/L)	0.2606	0.4671	0
C9_232-242	T-tau (ng/L)	0.2606	0.4671	0
C9_473-483	T-tau (ng/L)	0.297	0.4047	0
C9_497-508	T-tau (ng/L)	0.1758	0.6272	0
CTSB_210-220	T-tau (ng/L)	0.2727	0.4458	0
CTSB_58-71	T-tau (ng/L)	0.3576	0.3104	0
CTSB_80-87	T-tau (ng/L)	0.2	0.5796	0
CTSD_112-122	T-tau (ng/L)	0.3455	0.3282	0
CTSD_349-357	T-tau (ng/L)	0.3333	0.3466	0
CTSD_55-72	T-tau (ng/L)	-0.0667	0.8548	0
CatF_103-116	T-tau (ng/L)	0.4303	0.2145	0
CatF_236-245	T-tau (ng/L)	0.2	0.5796	0
CatF_266-278	T-tau (ng/L)	0.3697	0.2931	0
CatF_442-450	T-tau (ng/L)	0.3939	0.26	0
CTSL_105-116	T-tau (ng/L)	0.2727	0.4458	0
CTSZ_261-270	T-tau (ng/L)	0.2242	0.5334	0
CTSZ_39-47	T-tau (ng/L)	0.2364	0.5109	0
DPP7_113-123	T-tau (ng/L)	0.1879	0.6032	0
DPP7_40-47	T-tau (ng/L)	0.4667	0.1739	0
DPP7_449-462	T-tau (ng/L)	0.5636	0.0897	0
GM2A_170-179	T-tau (ng/L)	0.4182	0.2291	0
GM2A_89-96	T-tau (ng/L)	0.5394	0.1076	0
HEXB_285-300	T-tau (ng/L)	0.0909	0.8028	0
HEXB_391-400	T-tau (ng/L)	-0.103	0.777	0
LAMP1_138-146	T-tau (ng/L)	0.503	0.1383	0
LAMP1_327-337	T-tau (ng/L)	0.3939	0.26	0
LAMP1_357-363	T-tau (ng/L)	0.297	0.4047	0
LAMP2_133-144	T-tau (ng/L)	0.4788	0.1615	0
LAMP2_145-152	T-tau (ng/L)	0.2848	0.425	0
LAMP2_153-161	T-tau (ng/L)	0.6	0.0667	0
LAMP2_281-289	T-tau (ng/L)	0.5636	0.0897	0
LYZ_52-59	T-tau (ng/L)	0.3212	0.3655	0
LYZ_69-80	T-tau (ng/L)	0.2606	0.4671	0
FUCA1_114-130	T-tau (ng/L)	-0.3818	0.2763	0
FUCA1_163-173	T-tau (ng/L)	-0.4424	0.2004	0
FUCA1_344-354	T-tau (ng/L)	-0.1152	0.7514	0
TCN2_300-313	T-tau (ng/L)	0.1758	0.6272	0
TCN2_393-399	T-tau (ng/L)	0.0788	0.8287	0
TCN2_45-59	T-tau (ng/L)	0.2848	0.425	0
TPP1_246-259	T-tau (ng/L)	0.1515	0.6761	0
TPP1_507-520	T-tau (ng/L)	0.1152	0.7514	0
TPP1_61-78	T-tau (ng/L)	0.1758	0.6272	0
Ubiquitin_12-27	T-tau (ng/L)	0.5758	0.0816	0
Ubiquitin_64-72	T-tau (ng/L)	0.5515	0.0984	0

## Sheet: Clincial Study II Control
Table S4. Spearman's correlation in the Control group of Clinical Study II (N = 44).
Variable	by Variable	Spearman ρ	Prob>|ρ|	Correlation (True = 1, False = 0)
Ubiquitin_64-72	Ubiquitin_12-27	0.9374	<.0001	1
Ubiquitin_64-72	T-tau (ng/L)	0.8555	<.0001	1
Ubiquitin_12-27	T-tau (ng/L)	0.8458	<.0001	1
P-tau (ng/L)	T-tau (ng/L)	0.9309	<.0001	1
AP2B1_835-842	T-tau (ng/L)	0.8236	<.0001	1
AP2B1_712-719	T-tau (ng/L)	0.8255	<.0001	1
TPP1_507-520	TPP1_61-78	0.8579	<.0001	1
TPP1_507-520	TPP1_246-259	0.8861	<.0001	1
TCN2_393-399	TCN2_45-59	0.906	<.0001	1
TCN2_300-313	TCN2_45-59	0.9658	<.0001	1
TCN2_393-399	TCN2_300-313	0.9584	<.0001	1
FUCA1_344-354	FUCA1_163-173	0.9603	<.0001	1
FUCA1_344-354	FUCA1_114-130	0.9226	<.0001	1
FUCA1_163-173	FUCA1_114-130	0.9772	<.0001	1
Ubiquitin_64-72	P-tau (ng/L)	0.8958	<.0001	1
Ubiquitin_12-27	P-tau (ng/L)	0.8869	<.0001	1
AP2B1_835-842	P-tau (ng/L)	0.9024	<.0001	1
AP2B1_712-719	P-tau (ng/L)	0.884	<.0001	1
LYZ_69-80	LYZ_52-59	0.8561	<.0001	1
Ubiquitin_12-27	LAMP2_281-289	0.8292	<.0001	1
LAMP2_281-289	LAMP2_153-161	0.8747	<.0001	1
LAMP2_281-289	LAMP2_145-152	0.894	<.0001	1
LAMP2_153-161	LAMP2_145-152	0.8311	<.0001	1
Ubiquitin_12-27	LAMP2_133-144	0.8027	<.0001	1
LAMP2_281-289	LAMP2_133-144	0.959	<.0001	1
LAMP2_153-161	LAMP2_133-144	0.8605	<.0001	1
LAMP2_145-152	LAMP2_133-144	0.9397	<.0001	1
LAMP2_145-152	LAMP1_357-363	0.8764	<.0001	1
LAMP2_133-144	LAMP1_357-363	0.8372	<.0001	1
LAMP1_357-363	LAMP1_327-337	0.8455	<.0001	1
LAMP2_145-152	LAMP1_138-146	0.8448	<.0001	1
LAMP1_357-363	LAMP1_138-146	0.8348	<.0001	1
LAMP1_327-337	LAMP1_138-146	0.8097	<.0001	1
HEXB_391-400	HEXB_285-300	0.8121	<.0001	1
GM2A_170-179	GM2A_89-96	0.9507	<.0001	1
DPP7_449-462	DPP7_40-47	0.8612	<.0001	1
LAMP2_145-152	CTSL_105-116	0.8317	<.0001	1
LAMP1_357-363	CTSL_105-116	0.8568	<.0001	1
CatF_442-450	CatF_236-245	0.8421	<.0001	1
CatF_266-278	CatF_236-245	0.8244	<.0001	1
CatF_266-278	CatF_103-116	0.8082	<.0001	1
CatF_236-245	CatF_103-116	0.8104	<.0001	1
C9_497-508	C9_473-483	0.9658	<.0001	1
C9_497-508	C9_232-242	0.9624	<.0001	1
C9_473-483	C9_232-242	0.9708	<.0001	1
C9_497-508	C9_186-194	0.9366	<.0001	1
C9_473-483	C9_186-194	0.9736	<.0001	1
C9_232-242	C9_186-194	0.9617	<.0001	1
C9_497-508	C9_146-154	0.9192	<.0001	1
C9_473-483	C9_146-154	0.9467	<.0001	1
C9_232-242	C9_146-154	0.9387	<.0001	1
C9_186-194	C9_146-154	0.9711	<.0001	1
LAMP1_138-146	APP_289-301	0.8605	<.0001	1
APP_439-450	APP_289-301	0.9335	<.0001	1
Ubiquitin_64-72	AP2B1_835-842	0.8937	<.0001	1
Ubiquitin_12-27	AP2B1_835-842	0.9164	<.0001	1
LAMP2_281-289	AP2B1_835-842	0.8178	<.0001	1
LAMP2_145-152	AP2B1_835-842	0.8065	<.0001	1
LAMP2_133-144	AP2B1_835-842	0.8062	<.0001	1
GM2A_89-96	AP2B1_835-842	0.8193	<.0001	1
GM2A_170-179	AP2B1_835-842	0.8076	<.0001	1
Ubiquitin_64-72	AP2B1_712-719	0.8909	<.0001	1
Ubiquitin_12-27	AP2B1_712-719	0.9307	<.0001	1
GM2A_89-96	AP2B1_712-719	0.8364	<.0001	1
GM2A_170-179	AP2B1_712-719	0.8175	<.0001	1
AP2B1_835-842	AP2B1_712-719	0.9394	<.0001	1
TPP1_61-78	T-tau (ng/L)	0.2414	0.1144	0
TPP1_507-520	T-tau (ng/L)	0.2324	0.1289	0
TPP1_246-259	T-tau (ng/L)	0.1473	0.34	0
TCN2_45-59	T-tau (ng/L)	0.4951	0.0006	0
TCN2_393-399	T-tau (ng/L)	0.3594	0.0166	0
TCN2_300-313	T-tau (ng/L)	0.4402	0.0028	0
FUCA1_344-354	T-tau (ng/L)	0.3806	0.0108	0
FUCA1_163-173	T-tau (ng/L)	0.3372	0.0252	0
FUCA1_114-130	T-tau (ng/L)	0.3486	0.0204	0
LYZ_69-80	T-tau (ng/L)	0.2114	0.1683	0
LYZ_52-59	T-tau (ng/L)	0.2021	0.1882	0
LAMP2_281-289	T-tau (ng/L)	0.5871	<.0001	0
LAMP2_153-161	T-tau (ng/L)	0.5809	<.0001	0
LAMP2_145-152	T-tau (ng/L)	0.5717	<.0001	0
LAMP2_133-144	T-tau (ng/L)	0.539	0.0002	0
LAMP1_357-363	T-tau (ng/L)	0.5325	0.0002	0
LAMP1_327-337	T-tau (ng/L)	0.4934	0.0007	0
LAMP1_138-146	T-tau (ng/L)	0.4603	0.0017	0
HEXB_391-400	T-tau (ng/L)	0.2497	0.1021	0
HEXB_285-300	T-tau (ng/L)	0.364	0.0152	0
GM2A_89-96	T-tau (ng/L)	0.6474	<.0001	0
GM2A_170-179	T-tau (ng/L)	0.6187	<.0001	0
DPP7_449-462	T-tau (ng/L)	0.2996	0.0482	0
DPP7_40-47	T-tau (ng/L)	0.2014	0.19	0
DPP7_113-123	T-tau (ng/L)	0.2259	0.1404	0
CTSZ_39-47	T-tau (ng/L)	0.3769	0.0117	0
CTSZ_261-270	T-tau (ng/L)	0.3871	0.0094	0
CTSL_105-116	T-tau (ng/L)	0.4815	0.0009	0
CatF_442-450	T-tau (ng/L)	0.2054	0.1809	0
CatF_266-278	T-tau (ng/L)	0.0931	0.5478	0
CatF_236-245	T-tau (ng/L)	0.2705	0.0757	0
CatF_103-116	T-tau (ng/L)	0.3784	0.0113	0
CTSD_55-72	T-tau (ng/L)	0.1221	0.4296	0
CTSD_349-357	T-tau (ng/L)	-0.1858	0.2273	0
CTSD_112-122	T-tau (ng/L)	0.0944	0.542	0
CTSB_80-87	T-tau (ng/L)	0.5535	<.0001	0
CTSB_58-71	T-tau (ng/L)	0.2469	0.1062	0
CTSB_210-220	T-tau (ng/L)	0.4784	0.001	0
C9_497-508	T-tau (ng/L)	-0.0694	0.6546	0
C9_473-483	T-tau (ng/L)	-0.0065	0.9667	0
C9_232-242	T-tau (ng/L)	-0.0448	0.7726	0
C9_186-194	T-tau (ng/L)	-0.0324	0.8349	0
C9_146-154	T-tau (ng/L)	-0.0422	0.7855	0
BSA_421-433	T-tau (ng/L)	-0.2889	0.0572	0
Aβ1-42 (ng/L)	T-tau (ng/L)	0.4853	0.0008	0
APP_439-450	T-tau (ng/L)	0.5254	0.0003	0
APP_289-301	T-tau (ng/L)	0.5473	0.0001	0
Age	T-tau (ng/L)	0.2241	0.1435	0
Ubiquitin_64-72	TPP1_61-78	0.149	0.3345	0
Ubiquitin_12-27	TPP1_61-78	0.2681	0.0785	0
TPP1_246-259	TPP1_61-78	0.8	<.0001	0
Ubiquitin_64-72	TPP1_507-520	0.1793	0.2442	0
Ubiquitin_12-27	TPP1_507-520	0.3126	0.0388	0
Ubiquitin_64-72	TPP1_246-259	0.0803	0.6042	0
Ubiquitin_12-27	TPP1_246-259	0.1587	0.3035	0
Ubiquitin_64-72	TCN2_45-59	0.5078	0.0004	0
Ubiquitin_12-27	TCN2_45-59	0.5198	0.0003	0
TPP1_61-78	TCN2_45-59	0.0926	0.5499	0
TPP1_507-520	TCN2_45-59	0.0096	0.9508	0
TPP1_246-259	TCN2_45-59	-0.0078	0.9602	0
Ubiquitin_64-72	TCN2_393-399	0.3504	0.0197	0
Ubiquitin_12-27	TCN2_393-399	0.3877	0.0093	0
TPP1_61-78	TCN2_393-399	0.1323	0.3918	0
TPP1_507-520	TCN2_393-399	0.0355	0.819	0
TPP1_246-259	TCN2_393-399	-0.0331	0.831	0
Ubiquitin_64-72	TCN2_300-313	0.4758	0.0011	0
Ubiquitin_12-27	TCN2_300-313	0.4913	0.0007	0
TPP1_61-78	TCN2_300-313	0.1067	0.4906	0
TPP1_507-520	TCN2_300-313	0.0402	0.7957	0
TPP1_246-259	TCN2_300-313	-0.0156	0.9197	0
Ubiquitin_64-72	FUCA1_344-354	0.45	0.0022	0
Ubiquitin_12-27	FUCA1_344-354	0.4692	0.0013	0
TPP1_61-78	FUCA1_344-354	0.2739	0.072	0
TPP1_507-520	FUCA1_344-354	0.3745	0.0123	0
TPP1_246-259	FUCA1_344-354	0.3477	0.0207	0
TCN2_45-59	FUCA1_344-354	0.1053	0.4964	0
TCN2_393-399	FUCA1_344-354	-0.0359	0.8168	0
TCN2_300-313	FUCA1_344-354	0.0978	0.5276	0
Ubiquitin_64-72	FUCA1_163-173	0.3681	0.0139	0
Ubiquitin_12-27	FUCA1_163-173	0.4	0.0071	0
TPP1_61-78	FUCA1_163-173	0.2672	0.0795	0
TPP1_507-520	FUCA1_163-173	0.3986	0.0074	0
TPP1_246-259	FUCA1_163-173	0.3718	0.013	0
TCN2_45-59	FUCA1_163-173	0.0637	0.6812	0
TCN2_393-399	FUCA1_163-173	-0.0853	0.5821	0
TCN2_300-313	FUCA1_163-173	0.0402	0.7957	0
Ubiquitin_64-72	FUCA1_114-130	0.3686	0.0138	0
Ubiquitin_12-27	FUCA1_114-130	0.3875	0.0094	0
TPP1_61-78	FUCA1_114-130	0.2512	0.1001	0
TPP1_507-520	FUCA1_114-130	0.433	0.0033	0
TPP1_246-259	FUCA1_114-130	0.4113	0.0055	0
TCN2_45-59	FUCA1_114-130	0.0309	0.8423	0
TCN2_393-399	FUCA1_114-130	-0.1412	0.3605	0
TCN2_300-313	FUCA1_114-130	-0.009	0.9537	0
TPP1_61-78	P-tau (ng/L)	0.2232	0.1453	0
TPP1_507-520	P-tau (ng/L)	0.2186	0.1541	0
TPP1_246-259	P-tau (ng/L)	0.1035	0.5038	0
TCN2_45-59	P-tau (ng/L)	0.4813	0.0009	0
TCN2_393-399	P-tau (ng/L)	0.3496	0.02	0
TCN2_300-313	P-tau (ng/L)	0.4344	0.0032	0
FUCA1_344-354	P-tau (ng/L)	0.4459	0.0024	0
FUCA1_163-173	P-tau (ng/L)	0.3969	0.0076	0
FUCA1_114-130	P-tau (ng/L)	0.3959	0.0078	0
LYZ_69-80	P-tau (ng/L)	0.2514	0.0998	0
LYZ_52-59	P-tau (ng/L)	0.2502	0.1014	0
LAMP2_281-289	P-tau (ng/L)	0.687	<.0001	0
LAMP2_153-161	P-tau (ng/L)	0.6659	<.0001	0
LAMP2_145-152	P-tau (ng/L)	0.6924	<.0001	0
LAMP2_133-144	P-tau (ng/L)	0.6502	<.0001	0
LAMP1_357-363	P-tau (ng/L)	0.6135	<.0001	0
LAMP1_327-337	P-tau (ng/L)	0.5505	0.0001	0
LAMP1_138-146	P-tau (ng/L)	0.5647	<.0001	0
HEXB_391-400	P-tau (ng/L)	0.2064	0.1788	0
HEXB_285-300	P-tau (ng/L)	0.3817	0.0106	0
GM2A_89-96	P-tau (ng/L)	0.6893	<.0001	0
GM2A_170-179	P-tau (ng/L)	0.6986	<.0001	0
DPP7_449-462	P-tau (ng/L)	0.414	0.0052	0
DPP7_40-47	P-tau (ng/L)	0.3252	0.0313	0
DPP7_113-123	P-tau (ng/L)	0.2849	0.0608	0
CTSZ_39-47	P-tau (ng/L)	0.3757	0.012	0
CTSZ_261-270	P-tau (ng/L)	0.3714	0.0131	0
CTSL_105-116	P-tau (ng/L)	0.5419	0.0001	0
CatF_442-450	P-tau (ng/L)	0.233	0.128	0
CatF_266-278	P-tau (ng/L)	0.1185	0.4435	0
CatF_236-245	P-tau (ng/L)	0.3167	0.0362	0
CatF_103-116	P-tau (ng/L)	0.3783	0.0113	0
CTSD_55-72	P-tau (ng/L)	0.1222	0.4295	0
CTSD_349-357	P-tau (ng/L)	-0.1962	0.2018	0
CTSD_112-122	P-tau (ng/L)	0.0351	0.8212	0
CTSB_80-87	P-tau (ng/L)	0.5014	0.0005	0
CTSB_58-71	P-tau (ng/L)	0.2392	0.1178	0
CTSB_210-220	P-tau (ng/L)	0.5139	0.0004	0
C9_497-508	P-tau (ng/L)	-0.159	0.3025	0
C9_473-483	P-tau (ng/L)	-0.0765	0.6217	0
C9_232-242	P-tau (ng/L)	-0.1045	0.4997	0
C9_186-194	P-tau (ng/L)	-0.0958	0.5362	0
C9_146-154	P-tau (ng/L)	-0.1206	0.4356	0
BSA_421-433	P-tau (ng/L)	-0.3522	0.0191	0
APP_439-450	P-tau (ng/L)	0.5707	<.0001	0
APP_289-301	P-tau (ng/L)	0.6201	<.0001	0
Age	P-tau (ng/L)	0.0658	0.6714	0
Ubiquitin_64-72	LYZ_69-80	0.407	0.0061	0
Ubiquitin_12-27	LYZ_69-80	0.2858	0.06	0
TPP1_61-78	LYZ_69-80	0.0221	0.8866	0
TPP1_507-520	LYZ_69-80	0.0458	0.7678	0
TPP1_246-259	LYZ_69-80	0.0956	0.5372	0
TCN2_45-59	LYZ_69-80	0.3999	0.0072	0
TCN2_393-399	LYZ_69-80	0.284	0.0617	0
TCN2_300-313	LYZ_69-80	0.3646	0.015	0
FUCA1_344-354	LYZ_69-80	0.0354	0.8197	0
FUCA1_163-173	LYZ_69-80	-0.0629	0.6852	0
FUCA1_114-130	LYZ_69-80	-0.054	0.7278	0
Ubiquitin_64-72	LYZ_52-59	0.3917	0.0086	0
Ubiquitin_12-27	LYZ_52-59	0.3163	0.0365	0
TPP1_61-78	LYZ_52-59	-0.0011	0.9942	0
TPP1_507-520	LYZ_52-59	0.0087	0.9551	0
TPP1_246-259	LYZ_52-59	0.0617	0.6906	0
TCN2_45-59	LYZ_52-59	0.4389	0.0029	0
TCN2_393-399	LYZ_52-59	0.3443	0.0221	0
TCN2_300-313	LYZ_52-59	0.4142	0.0052	0
FUCA1_344-354	LYZ_52-59	0.1526	0.3226	0
FUCA1_163-173	LYZ_52-59	0.0516	0.7395	0
FUCA1_114-130	LYZ_52-59	0.0252	0.8709	0
Ubiquitin_64-72	LAMP2_281-289	0.7545	<.0001	0
TPP1_61-78	LAMP2_281-289	0.4341	0.0032	0
TPP1_507-520	LAMP2_281-289	0.5209	0.0003	0
TPP1_246-259	LAMP2_281-289	0.3694	0.0136	0
TCN2_45-59	LAMP2_281-289	0.3653	0.0147	0
TCN2_393-399	LAMP2_281-289	0.2407	0.1155	0
TCN2_300-313	LAMP2_281-289	0.3521	0.0191	0
FUCA1_344-354	LAMP2_281-289	0.5301	0.0002	0
FUCA1_163-173	LAMP2_281-289	0.4846	0.0009	0
FUCA1_114-130	LAMP2_281-289	0.4975	0.0006	0
LYZ_69-80	LAMP2_281-289	0.306	0.0434	0
LYZ_52-59	LAMP2_281-289	0.3295	0.0289	0
Ubiquitin_64-72	LAMP2_153-161	0.682	<.0001	0
Ubiquitin_12-27	LAMP2_153-161	0.7411	<.0001	0
TPP1_61-78	LAMP2_153-161	0.4295	0.0036	0
TPP1_507-520	LAMP2_153-161	0.4141	0.0052	0
TPP1_246-259	LAMP2_153-161	0.2981	0.0494	0
TCN2_45-59	LAMP2_153-161	0.3608	0.0161	0
TCN2_393-399	LAMP2_153-161	0.2365	0.1222	0
TCN2_300-313	LAMP2_153-161	0.3383	0.0247	0
FUCA1_344-354	LAMP2_153-161	0.4093	0.0058	0
FUCA1_163-173	LAMP2_153-161	0.3639	0.0152	0
FUCA1_114-130	LAMP2_153-161	0.3663	0.0145	0
LYZ_69-80	LAMP2_153-161	0.3122	0.0391	0
LYZ_52-59	LAMP2_153-161	0.319	0.0348	0
Ubiquitin_64-72	LAMP2_145-152	0.7387	<.0001	0
Ubiquitin_12-27	LAMP2_145-152	0.7938	<.0001	0
TPP1_61-78	LAMP2_145-152	0.4717	0.0012	0
TPP1_507-520	LAMP2_145-152	0.4434	0.0026	0
TPP1_246-259	LAMP2_145-152	0.3215	0.0333	0
TCN2_45-59	LAMP2_145-152	0.4503	0.0022	0
TCN2_393-399	LAMP2_145-152	0.3215	0.0333	0
TCN2_300-313	LAMP2_145-152	0.4342	0.0032	0
FUCA1_344-354	LAMP2_145-152	0.5043	0.0005	0
FUCA1_163-173	LAMP2_145-152	0.4351	0.0032	0
FUCA1_114-130	LAMP2_145-152	0.4017	0.0069	0
LYZ_69-80	LAMP2_145-152	0.4258	0.004	0
LYZ_52-59	LAMP2_145-152	0.471	0.0013	0
Ubiquitin_64-72	LAMP2_133-144	0.7263	<.0001	0
TPP1_61-78	LAMP2_133-144	0.4631	0.0015	0
TPP1_507-520	LAMP2_133-144	0.5259	0.0002	0
TPP1_246-259	LAMP2_133-144	0.3545	0.0182	0
TCN2_45-59	LAMP2_133-144	0.3618	0.0158	0
TCN2_393-399	LAMP2_133-144	0.261	0.087	0
TCN2_300-313	LAMP2_133-144	0.3665	0.0144	0
FUCA1_344-354	LAMP2_133-144	0.465	0.0015	0
FUCA1_163-173	LAMP2_133-144	0.4135	0.0053	0
FUCA1_114-130	LAMP2_133-144	0.4195	0.0046	0
LYZ_69-80	LAMP2_133-144	0.3326	0.0274	0
LYZ_52-59	LAMP2_133-144	0.3287	0.0294	0
Ubiquitin_64-72	LAMP1_357-363	0.6512	<.0001	0
Ubiquitin_12-27	LAMP1_357-363	0.7019	<.0001	0
TPP1_61-78	LAMP1_357-363	0.5559	<.0001	0
TPP1_507-520	LAMP1_357-363	0.5556	<.0001	0
TPP1_246-259	LAMP1_357-363	0.4672	0.0014	0
TCN2_45-59	LAMP1_357-363	0.344	0.0222	0
TCN2_393-399	LAMP1_357-363	0.2758	0.0699	0
TCN2_300-313	LAMP1_357-363	0.3567	0.0175	0
FUCA1_344-354	LAMP1_357-363	0.5694	<.0001	0
FUCA1_163-173	LAMP1_357-363	0.4978	0.0006	0
FUCA1_114-130	LAMP1_357-363	0.4472	0.0023	0
LYZ_69-80	LAMP1_357-363	0.3367	0.0254	0
LYZ_52-59	LAMP1_357-363	0.3814	0.0106	0
LAMP2_281-289	LAMP1_357-363	0.7935	<.0001	0
LAMP2_153-161	LAMP1_357-363	0.7304	<.0001	0
Ubiquitin_64-72	LAMP1_327-337	0.6044	<.0001	0
Ubiquitin_12-27	LAMP1_327-337	0.6199	<.0001	0
TPP1_61-78	LAMP1_327-337	0.5091	0.0004	0
TPP1_507-520	LAMP1_327-337	0.4006	0.0071	0
TPP1_246-259	LAMP1_327-337	0.3956	0.0079	0
TCN2_45-59	LAMP1_327-337	0.3918	0.0085	0
TCN2_393-399	LAMP1_327-337	0.3381	0.0248	0
TCN2_300-313	LAMP1_327-337	0.3922	0.0085	0
FUCA1_344-354	LAMP1_327-337	0.4846	0.0009	0
FUCA1_163-173	LAMP1_327-337	0.3875	0.0094	0
FUCA1_114-130	LAMP1_327-337	0.3064	0.0431	0
LYZ_69-80	LAMP1_327-337	0.3418	0.0232	0
LYZ_52-59	LAMP1_327-337	0.4055	0.0063	0
LAMP2_281-289	LAMP1_327-337	0.6361	<.0001	0
LAMP2_153-161	LAMP1_327-337	0.6479	<.0001	0
LAMP2_145-152	LAMP1_327-337	0.781	<.0001	0
LAMP2_133-144	LAMP1_327-337	0.6691	<.0001	0
Ubiquitin_64-72	LAMP1_138-146	0.567	<.0001	0
Ubiquitin_12-27	LAMP1_138-146	0.6079	<.0001	0
TPP1_61-78	LAMP1_138-146	0.6493	<.0001	0
TPP1_507-520	LAMP1_138-146	0.5431	0.0001	0
TPP1_246-259	LAMP1_138-146	0.5144	0.0004	0
TCN2_45-59	LAMP1_138-146	0.3958	0.0078	0
TCN2_393-399	LAMP1_138-146	0.2591	0.0895	0
TCN2_300-313	LAMP1_138-146	0.356	0.0177	0
FUCA1_344-354	LAMP1_138-146	0.4476	0.0023	0
FUCA1_163-173	LAMP1_138-146	0.4006	0.0071	0
FUCA1_114-130	LAMP1_138-146	0.3676	0.0141	0
LYZ_69-80	LAMP1_138-146	0.3254	0.0311	0
LYZ_52-59	LAMP1_138-146	0.3665	0.0144	0
LAMP2_281-289	LAMP1_138-146	0.7342	<.0001	0
LAMP2_153-161	LAMP1_138-146	0.717	<.0001	0
LAMP2_133-144	LAMP1_138-146	0.766	<.0001	0
Ubiquitin_64-72	HEXB_391-400	0.232	0.1297	0
Ubiquitin_12-27	HEXB_391-400	0.3133	0.0384	0
TPP1_61-78	HEXB_391-400	0.6732	<.0001	0
TPP1_507-520	HEXB_391-400	0.7562	<.0001	0
TPP1_246-259	HEXB_391-400	0.7089	<.0001	0
TCN2_45-59	HEXB_391-400	0.2817	0.0639	0
TCN2_393-399	HEXB_391-400	0.3091	0.0412	0
TCN2_300-313	HEXB_391-400	0.3201	0.0342	0
FUCA1_344-354	HEXB_391-400	0.1728	0.262	0
FUCA1_163-173	HEXB_391-400	0.1956	0.2031	0
FUCA1_114-130	HEXB_391-400	0.203	0.1864	0
LYZ_69-80	HEXB_391-400	0.0406	0.7936	0
LYZ_52-59	HEXB_391-400	0.0624	0.6872	0
LAMP2_281-289	HEXB_391-400	0.4751	0.0011	0
LAMP2_153-161	HEXB_391-400	0.3629	0.0155	0
LAMP2_145-152	HEXB_391-400	0.4351	0.0032	0
LAMP2_133-144	HEXB_391-400	0.4726	0.0012	0
LAMP1_357-363	HEXB_391-400	0.5522	0.0001	0
LAMP1_327-337	HEXB_391-400	0.502	0.0005	0
LAMP1_138-146	HEXB_391-400	0.5595	<.0001	0
Ubiquitin_64-72	HEXB_285-300	0.45	0.0022	0
Ubiquitin_12-27	HEXB_285-300	0.4984	0.0006	0
TPP1_61-78	HEXB_285-300	0.6547	<.0001	0
TPP1_507-520	HEXB_285-300	0.7924	<.0001	0
TPP1_246-259	HEXB_285-300	0.7931	<.0001	0
TCN2_45-59	HEXB_285-300	0.2249	0.1421	0
TCN2_393-399	HEXB_285-300	0.1156	0.455	0
TCN2_300-313	HEXB_285-300	0.2154	0.1603	0
FUCA1_344-354	HEXB_285-300	0.4576	0.0018	0
FUCA1_163-173	HEXB_285-300	0.462	0.0016	0
FUCA1_114-130	HEXB_285-300	0.493	0.0007	0
LYZ_69-80	HEXB_285-300	0.2288	0.1353	0
LYZ_52-59	HEXB_285-300	0.1904	0.2157	0
LAMP2_281-289	HEXB_285-300	0.6403	<.0001	0
LAMP2_153-161	HEXB_285-300	0.5476	0.0001	0
LAMP2_145-152	HEXB_285-300	0.6027	<.0001	0
LAMP2_133-144	HEXB_285-300	0.6402	<.0001	0
LAMP1_357-363	HEXB_285-300	0.6761	<.0001	0
LAMP1_327-337	HEXB_285-300	0.5608	<.0001	0
LAMP1_138-146	HEXB_285-300	0.6803	<.0001	0
Ubiquitin_64-72	GM2A_89-96	0.7463	<.0001	0
Ubiquitin_12-27	GM2A_89-96	0.7683	<.0001	0
TPP1_61-78	GM2A_89-96	0.2579	0.091	0
TPP1_507-520	GM2A_89-96	0.2289	0.135	0
TPP1_246-259	GM2A_89-96	0.0698	0.6527	0
TCN2_45-59	GM2A_89-96	0.43	0.0036	0
TCN2_393-399	GM2A_89-96	0.4385	0.0029	0
TCN2_300-313	GM2A_89-96	0.4933	0.0007	0
FUCA1_344-354	GM2A_89-96	0.5133	0.0004	0
FUCA1_163-173	GM2A_89-96	0.4069	0.0061	0
FUCA1_114-130	GM2A_89-96	0.3307	0.0284	0
LYZ_69-80	GM2A_89-96	0.3164	0.0364	0
LYZ_52-59	GM2A_89-96	0.3739	0.0124	0
LAMP2_281-289	GM2A_89-96	0.6615	<.0001	0
LAMP2_153-161	GM2A_89-96	0.6499	<.0001	0
LAMP2_145-152	GM2A_89-96	0.7338	<.0001	0
LAMP2_133-144	GM2A_89-96	0.694	<.0001	0
LAMP1_357-363	GM2A_89-96	0.7447	<.0001	0
LAMP1_327-337	GM2A_89-96	0.7276	<.0001	0
LAMP1_138-146	GM2A_89-96	0.5336	0.0002	0
HEXB_391-400	GM2A_89-96	0.2455	0.1082	0
HEXB_285-300	GM2A_89-96	0.3168	0.0361	0
Ubiquitin_64-72	GM2A_170-179	0.7218	<.0001	0
Ubiquitin_12-27	GM2A_170-179	0.7512	<.0001	0
TPP1_61-78	GM2A_170-179	0.2476	0.1051	0
TPP1_507-520	GM2A_170-179	0.2154	0.1603	0
TPP1_246-259	GM2A_170-179	0.0719	0.6429	0
TCN2_45-59	GM2A_170-179	0.4514	0.0021	0
TCN2_393-399	GM2A_170-179	0.4345	0.0032	0
TCN2_300-313	GM2A_170-179	0.4988	0.0006	0
FUCA1_344-354	GM2A_170-179	0.5135	0.0004	0
FUCA1_163-173	GM2A_170-179	0.4054	0.0063	0
FUCA1_114-130	GM2A_170-179	0.33	0.0287	0
LYZ_69-80	GM2A_170-179	0.3391	0.0243	0
LYZ_52-59	GM2A_170-179	0.43	0.0036	0
LAMP2_281-289	GM2A_170-179	0.6505	<.0001	0
LAMP2_153-161	GM2A_170-179	0.666	<.0001	0
LAMP2_145-152	GM2A_170-179	0.7393	<.0001	0
LAMP2_133-144	GM2A_170-179	0.6796	<.0001	0
LAMP1_357-363	GM2A_170-179	0.7322	<.0001	0
LAMP1_327-337	GM2A_170-179	0.7549	<.0001	0
LAMP1_138-146	GM2A_170-179	0.5642	<.0001	0
HEXB_391-400	GM2A_170-179	0.2496	0.1022	0
HEXB_285-300	GM2A_170-179	0.3295	0.0289	0
Ubiquitin_64-72	DPP7_449-462	0.4403	0.0028	0
Ubiquitin_12-27	DPP7_449-462	0.477	0.0011	0
TPP1_61-78	DPP7_449-462	0.3884	0.0092	0
TPP1_507-520	DPP7_449-462	0.5092	0.0004	0
TPP1_246-259	DPP7_449-462	0.4426	0.0026	0
TCN2_45-59	DPP7_449-462	0.3349	0.0263	0
TCN2_393-399	DPP7_449-462	0.3332	0.0271	0
TCN2_300-313	DPP7_449-462	0.3839	0.0101	0
FUCA1_344-354	DPP7_449-462	0.4825	0.0009	0
FUCA1_163-173	DPP7_449-462	0.4268	0.0039	0
FUCA1_114-130	DPP7_449-462	0.4027	0.0067	0
LYZ_69-80	DPP7_449-462	0.1891	0.2188	0
LYZ_52-59	DPP7_449-462	0.2058	0.1802	0
LAMP2_281-289	DPP7_449-462	0.5508	0.0001	0
LAMP2_153-161	DPP7_449-462	0.496	0.0006	0
LAMP2_145-152	DPP7_449-462	0.514	0.0004	0
LAMP2_133-144	DPP7_449-462	0.5174	0.0003	0
LAMP1_357-363	DPP7_449-462	0.5363	0.0002	0
LAMP1_327-337	DPP7_449-462	0.5777	<.0001	0
LAMP1_138-146	DPP7_449-462	0.5298	0.0002	0
HEXB_391-400	DPP7_449-462	0.5212	0.0003	0
HEXB_285-300	DPP7_449-462	0.5538	<.0001	0
GM2A_89-96	DPP7_449-462	0.4754	0.0011	0
GM2A_170-179	DPP7_449-462	0.5273	0.0002	0
Ubiquitin_64-72	DPP7_40-47	0.347	0.021	0
Ubiquitin_12-27	DPP7_40-47	0.393	0.0083	0
TPP1_61-78	DPP7_40-47	0.3948	0.008	0
TPP1_507-520	DPP7_40-47	0.485	0.0008	0
TPP1_246-259	DPP7_40-47	0.4443	0.0025	0
TCN2_45-59	DPP7_40-47	0.2775	0.0682	0
TCN2_393-399	DPP7_40-47	0.2857	0.0601	0
TCN2_300-313	DPP7_40-47	0.3101	0.0405	0
FUCA1_344-354	DPP7_40-47	0.4514	0.0021	0
FUCA1_163-173	DPP7_40-47	0.3939	0.0081	0
FUCA1_114-130	DPP7_40-47	0.3704	0.0133	0
LYZ_69-80	DPP7_40-47	0.1484	0.3363	0
LYZ_52-59	DPP7_40-47	0.1525	0.323	0
LAMP2_281-289	DPP7_40-47	0.4699	0.0013	0
LAMP2_153-161	DPP7_40-47	0.3204	0.034	0
LAMP2_145-152	DPP7_40-47	0.4348	0.0032	0
LAMP2_133-144	DPP7_40-47	0.4506	0.0021	0
LAMP1_357-363	DPP7_40-47	0.4791	0.001	0
LAMP1_327-337	DPP7_40-47	0.502	0.0005	0
LAMP1_138-146	DPP7_40-47	0.4724	0.0012	0
HEXB_391-400	DPP7_40-47	0.4693	0.0013	0
HEXB_285-300	DPP7_40-47	0.4947	0.0006	0
GM2A_89-96	DPP7_40-47	0.3944	0.0081	0
GM2A_170-179	DPP7_40-47	0.4813	0.0009	0
DPP7_113-123	DPP7_40-47	0.7704	<.0001	0
Ubiquitin_64-72	DPP7_113-123	0.2984	0.0491	0
Ubiquitin_12-27	DPP7_113-123	0.4175	0.0048	0
TPP1_61-78	DPP7_113-123	0.4171	0.0049	0
TPP1_507-520	DPP7_113-123	0.4696	0.0013	0
TPP1_246-259	DPP7_113-123	0.3519	0.0191	0
TCN2_45-59	DPP7_113-123	0.2727	0.0733	0
TCN2_393-399	DPP7_113-123	0.3146	0.0375	0
TCN2_300-313	DPP7_113-123	0.3481	0.0206	0
FUCA1_344-354	DPP7_113-123	0.4334	0.0033	0
FUCA1_163-173	DPP7_113-123	0.3474	0.0208	0
FUCA1_114-130	DPP7_113-123	0.2851	0.0606	0
LYZ_69-80	DPP7_113-123	0.0078	0.9602	0
LYZ_52-59	DPP7_113-123	0.1529	0.3217	0
LAMP2_281-289	DPP7_113-123	0.4478	0.0023	0
LAMP2_153-161	DPP7_113-123	0.4309	0.0035	0
LAMP2_145-152	DPP7_113-123	0.4283	0.0037	0
LAMP2_133-144	DPP7_113-123	0.4486	0.0023	0
LAMP1_357-363	DPP7_113-123	0.4865	0.0008	0
LAMP1_327-337	DPP7_113-123	0.5011	0.0005	0
LAMP1_138-146	DPP7_113-123	0.4844	0.0009	0
HEXB_391-400	DPP7_113-123	0.4156	0.005	0
HEXB_285-300	DPP7_113-123	0.4406	0.0028	0
GM2A_89-96	DPP7_113-123	0.4547	0.0019	0
GM2A_170-179	DPP7_113-123	0.508	0.0004	0
DPP7_449-462	DPP7_113-123	0.7419	<.0001	0
Ubiquitin_64-72	CTSZ_39-47	0.3897	0.0089	0
Ubiquitin_12-27	CTSZ_39-47	0.3853	0.0098	0
TPP1_61-78	CTSZ_39-47	0.5517	0.0001	0
TPP1_507-520	CTSZ_39-47	0.4524	0.002	0
TPP1_246-259	CTSZ_39-47	0.4534	0.002	0
TCN2_45-59	CTSZ_39-47	0.3545	0.0182	0
TCN2_393-399	CTSZ_39-47	0.2433	0.1116	0
TCN2_300-313	CTSZ_39-47	0.2975	0.0498	0
FUCA1_344-354	CTSZ_39-47	0.3116	0.0395	0
FUCA1_163-173	CTSZ_39-47	0.2675	0.0792	0
FUCA1_114-130	CTSZ_39-47	0.2651	0.082	0
LYZ_69-80	CTSZ_39-47	0.3128	0.0387	0
LYZ_52-59	CTSZ_39-47	0.2382	0.1195	0
LAMP2_281-289	CTSZ_39-47	0.495	0.0006	0
LAMP2_153-161	CTSZ_39-47	0.5201	0.0003	0
LAMP2_145-152	CTSZ_39-47	0.5663	<.0001	0
LAMP2_133-144	CTSZ_39-47	0.5223	0.0003	0
LAMP1_357-363	CTSZ_39-47	0.5347	0.0002	0
LAMP1_327-337	CTSZ_39-47	0.5632	<.0001	0
LAMP1_138-146	CTSZ_39-47	0.7301	<.0001	0
HEXB_391-400	CTSZ_39-47	0.466	0.0014	0
HEXB_285-300	CTSZ_39-47	0.5395	0.0002	0
GM2A_89-96	CTSZ_39-47	0.3694	0.0136	0
GM2A_170-179	CTSZ_39-47	0.3622	0.0157	0
DPP7_449-462	CTSZ_39-47	0.4407	0.0028	0
DPP7_40-47	CTSZ_39-47	0.4475	0.0023	0
DPP7_113-123	CTSZ_39-47	0.3462	0.0214	0
CTSZ_261-270	CTSZ_39-47	0.7844	<.0001	0
Ubiquitin_64-72	CTSZ_261-270	0.4505	0.0022	0
Ubiquitin_12-27	CTSZ_261-270	0.4252	0.004	0
TPP1_61-78	CTSZ_261-270	0.535	0.0002	0
TPP1_507-520	CTSZ_261-270	0.4609	0.0016	0
TPP1_246-259	CTSZ_261-270	0.45	0.0022	0
TCN2_45-59	CTSZ_261-270	0.3595	0.0165	0
TCN2_393-399	CTSZ_261-270	0.2386	0.1188	0
TCN2_300-313	CTSZ_261-270	0.3237	0.032	0
FUCA1_344-354	CTSZ_261-270	0.3587	0.0168	0
FUCA1_163-173	CTSZ_261-270	0.3173	0.0359	0
FUCA1_114-130	CTSZ_261-270	0.3022	0.0462	0
LYZ_69-80	CTSZ_261-270	0.344	0.0222	0
LYZ_52-59	CTSZ_261-270	0.3294	0.029	0
LAMP2_281-289	CTSZ_261-270	0.545	0.0001	0
LAMP2_153-161	CTSZ_261-270	0.5352	0.0002	0
LAMP2_145-152	CTSZ_261-270	0.6514	<.0001	0
LAMP2_133-144	CTSZ_261-270	0.589	<.0001	0
LAMP1_357-363	CTSZ_261-270	0.695	<.0001	0
LAMP1_327-337	CTSZ_261-270	0.6488	<.0001	0
LAMP1_138-146	CTSZ_261-270	0.7638	<.0001	0
HEXB_391-400	CTSZ_261-270	0.5766	<.0001	0
HEXB_285-300	CTSZ_261-270	0.6461	<.0001	0
GM2A_89-96	CTSZ_261-270	0.4366	0.003	0
GM2A_170-179	CTSZ_261-270	0.4134	0.0053	0
DPP7_449-462	CTSZ_261-270	0.4045	0.0065	0
DPP7_40-47	CTSZ_261-270	0.4237	0.0042	0
DPP7_113-123	CTSZ_261-270	0.4268	0.0039	0
Ubiquitin_64-72	CTSL_105-116	0.5447	0.0001	0
Ubiquitin_12-27	CTSL_105-116	0.6165	<.0001	0
TPP1_61-78	CTSL_105-116	0.5639	<.0001	0
TPP1_507-520	CTSL_105-116	0.6414	<.0001	0
TPP1_246-259	CTSL_105-116	0.603	<.0001	0
TCN2_45-59	CTSL_105-116	0.3009	0.0472	0
TCN2_393-399	CTSL_105-116	0.2048	0.1824	0
TCN2_300-313	CTSL_105-116	0.2982	0.0493	0
FUCA1_344-354	CTSL_105-116	0.6516	<.0001	0
FUCA1_163-173	CTSL_105-116	0.6039	<.0001	0
FUCA1_114-130	CTSL_105-116	0.5787	<.0001	0
LYZ_69-80	CTSL_105-116	0.3318	0.0278	0
LYZ_52-59	CTSL_105-116	0.3715	0.013	0
LAMP2_281-289	CTSL_105-116	0.7693	<.0001	0
LAMP2_153-161	CTSL_105-116	0.7146	<.0001	0
LAMP2_133-144	CTSL_105-116	0.7829	<.0001	0
LAMP1_327-337	CTSL_105-116	0.7656	<.0001	0
LAMP1_138-146	CTSL_105-116	0.7464	<.0001	0
HEXB_391-400	CTSL_105-116	0.6172	<.0001	0
HEXB_285-300	CTSL_105-116	0.7591	<.0001	0
GM2A_89-96	CTSL_105-116	0.6161	<.0001	0
GM2A_170-179	CTSL_105-116	0.6397	<.0001	0
DPP7_449-462	CTSL_105-116	0.6703	<.0001	0
DPP7_40-47	CTSL_105-116	0.5973	<.0001	0
DPP7_113-123	CTSL_105-116	0.5256	0.0002	0
CTSZ_39-47	CTSL_105-116	0.6255	<.0001	0
CTSZ_261-270	CTSL_105-116	0.6781	<.0001	0
Ubiquitin_64-72	CatF_442-450	0.2684	0.0782	0
Ubiquitin_12-27	CatF_442-450	0.3074	0.0424	0
TPP1_61-78	CatF_442-450	0.5053	0.0005	0
TPP1_507-520	CatF_442-450	0.4197	0.0046	0
TPP1_246-259	CatF_442-450	0.4374	0.003	0
TCN2_45-59	CatF_442-450	0.5081	0.0004	0
TCN2_393-399	CatF_442-450	0.5729	<.0001	0
TCN2_300-313	CatF_442-450	0.5689	<.0001	0
FUCA1_344-354	CatF_442-450	0.2755	0.0702	0
FUCA1_163-173	CatF_442-450	0.1732	0.2608	0
FUCA1_114-130	CatF_442-450	0.1078	0.486	0
LYZ_69-80	CatF_442-450	0.3887	0.0091	0
LYZ_52-59	CatF_442-450	0.4065	0.0062	0
LAMP2_281-289	CatF_442-450	0.296	0.0511	0
LAMP2_153-161	CatF_442-450	0.2527	0.0979	0
LAMP2_145-152	CatF_442-450	0.4895	0.0007	0
LAMP2_133-144	CatF_442-450	0.3949	0.008	0
LAMP1_357-363	CatF_442-450	0.5146	0.0004	0
LAMP1_327-337	CatF_442-450	0.5777	<.0001	0
LAMP1_138-146	CatF_442-450	0.483	0.0009	0
HEXB_391-400	CatF_442-450	0.3825	0.0104	0
HEXB_285-300	CatF_442-450	0.3886	0.0091	0
GM2A_89-96	CatF_442-450	0.4055	0.0063	0
GM2A_170-179	CatF_442-450	0.4156	0.005	0
DPP7_449-462	CatF_442-450	0.505	0.0005	0
DPP7_40-47	CatF_442-450	0.4947	0.0006	0
DPP7_113-123	CatF_442-450	0.5058	0.0005	0
CTSZ_39-47	CatF_442-450	0.3347	0.0263	0
CTSZ_261-270	CatF_442-450	0.4142	0.0052	0
CTSL_105-116	CatF_442-450	0.5254	0.0002	0
Ubiquitin_64-72	CatF_266-278	0.2345	0.1254	0
Ubiquitin_12-27	CatF_266-278	0.2338	0.1266	0
TPP1_61-78	CatF_266-278	0.4445	0.0025	0
TPP1_507-520	CatF_266-278	0.4078	0.006	0
TPP1_246-259	CatF_266-278	0.4812	0.0009	0
TCN2_45-59	CatF_266-278	0.3889	0.0091	0
TCN2_393-399	CatF_266-278	0.3969	0.0076	0
TCN2_300-313	CatF_266-278	0.4316	0.0034	0
FUCA1_344-354	CatF_266-278	0.1032	0.5051	0
FUCA1_163-173	CatF_266-278	-0.0054	0.9725	0
FUCA1_114-130	CatF_266-278	-0.0062	0.9681	0
LYZ_69-80	CatF_266-278	0.5139	0.0004	0
LYZ_52-59	CatF_266-278	0.5356	0.0002	0
LAMP2_281-289	CatF_266-278	0.3254	0.0311	0
LAMP2_153-161	CatF_266-278	0.3122	0.0391	0
LAMP2_145-152	CatF_266-278	0.463	0.0016	0
LAMP2_133-144	CatF_266-278	0.3961	0.0078	0
LAMP1_357-363	CatF_266-278	0.4732	0.0012	0
LAMP1_327-337	CatF_266-278	0.4989	0.0006	0
LAMP1_138-146	CatF_266-278	0.4856	0.0008	0
HEXB_391-400	CatF_266-278	0.5119	0.0004	0
HEXB_285-300	CatF_266-278	0.5245	0.0003	0
GM2A_89-96	CatF_266-278	0.2061	0.1796	0
GM2A_170-179	CatF_266-278	0.2585	0.0902	0
DPP7_449-462	CatF_266-278	0.441	0.0027	0
DPP7_40-47	CatF_266-278	0.4013	0.0069	0
DPP7_113-123	CatF_266-278	0.3696	0.0136	0
CTSZ_39-47	CatF_266-278	0.3352	0.0261	0
CTSZ_261-270	CatF_266-278	0.4771	0.0011	0
CTSL_105-116	CatF_266-278	0.5342	0.0002	0
CatF_442-450	CatF_266-278	0.7729	<.0001	0
Ubiquitin_64-72	CatF_236-245	0.3973	0.0076	0
Ubiquitin_12-27	CatF_236-245	0.3697	0.0135	0
TPP1_61-78	CatF_236-245	0.4481	0.0023	0
TPP1_507-520	CatF_236-245	0.4196	0.0046	0
TPP1_246-259	CatF_236-245	0.4754	0.0011	0
TCN2_45-59	CatF_236-245	0.485	0.0008	0
TCN2_393-399	CatF_236-245	0.4526	0.002	0
TCN2_300-313	CatF_236-245	0.5349	0.0002	0
FUCA1_344-354	CatF_236-245	0.3658	0.0146	0
FUCA1_163-173	CatF_236-245	0.2413	0.1146	0
FUCA1_114-130	CatF_236-245	0.1937	0.2078	0
LYZ_69-80	CatF_236-245	0.5349	0.0002	0
LYZ_52-59	CatF_236-245	0.5581	<.0001	0
LAMP2_281-289	CatF_236-245	0.3667	0.0143	0
LAMP2_153-161	CatF_236-245	0.3063	0.0432	0
LAMP2_145-152	CatF_236-245	0.5591	<.0001	0
LAMP2_133-144	CatF_236-245	0.4296	0.0036	0
LAMP1_357-363	CatF_236-245	0.5645	<.0001	0
LAMP1_327-337	CatF_236-245	0.6299	<.0001	0
LAMP1_138-146	CatF_236-245	0.6028	<.0001	0
HEXB_391-400	CatF_236-245	0.4777	0.001	0
HEXB_285-300	CatF_236-245	0.5519	0.0001	0
GM2A_89-96	CatF_236-245	0.4458	0.0024	0
GM2A_170-179	CatF_236-245	0.476	0.0011	0
DPP7_449-462	CatF_236-245	0.598	<.0001	0
DPP7_40-47	CatF_236-245	0.5404	0.0002	0
DPP7_113-123	CatF_236-245	0.5267	0.0002	0
CTSZ_39-47	CatF_236-245	0.4445	0.0025	0
CTSZ_261-270	CatF_236-245	0.5404	0.0002	0
CTSL_105-116	CatF_236-245	0.6209	<.0001	0
Ubiquitin_64-72	CatF_103-116	0.4699	0.0013	0
Ubiquitin_12-27	CatF_103-116	0.4383	0.0029	0
TPP1_61-78	CatF_103-116	0.382	0.0105	0
TPP1_507-520	CatF_103-116	0.3635	0.0153	0
TPP1_246-259	CatF_103-116	0.4262	0.0039	0
TCN2_45-59	CatF_103-116	0.5542	<.0001	0
TCN2_393-399	CatF_103-116	0.5429	0.0001	0
TCN2_300-313	CatF_103-116	0.5769	<.0001	0
FUCA1_344-354	CatF_103-116	0.1295	0.402	0
FUCA1_163-173	CatF_103-116	0.0176	0.9096	0
FUCA1_114-130	CatF_103-116	0.0403	0.795	0
LYZ_69-80	CatF_103-116	0.4927	0.0007	0
LYZ_52-59	CatF_103-116	0.4061	0.0062	0
LAMP2_281-289	CatF_103-116	0.3942	0.0081	0
LAMP2_153-161	CatF_103-116	0.303	0.0456	0
LAMP2_145-152	CatF_103-116	0.4615	0.0016	0
LAMP2_133-144	CatF_103-116	0.4175	0.0048	0
LAMP1_357-363	CatF_103-116	0.3942	0.0081	0
LAMP1_327-337	CatF_103-116	0.4958	0.0006	0
LAMP1_138-146	CatF_103-116	0.4647	0.0015	0
HEXB_391-400	CatF_103-116	0.4713	0.0012	0
HEXB_285-300	CatF_103-116	0.4908	0.0007	0
GM2A_89-96	CatF_103-116	0.3268	0.0303	0
GM2A_170-179	CatF_103-116	0.349	0.0202	0
DPP7_449-462	CatF_103-116	0.5091	0.0004	0
DPP7_40-47	CatF_103-116	0.4848	0.0009	0
DPP7_113-123	CatF_103-116	0.3405	0.0237	0
CTSZ_39-47	CatF_103-116	0.4069	0.0061	0
CTSZ_261-270	CatF_103-116	0.4248	0.004	0
CTSL_105-116	CatF_103-116	0.4691	0.0013	0
CatF_442-450	CatF_103-116	0.7542	<.0001	0
Ubiquitin_64-72	CTSD_55-72	0.2148	0.1615	0
Ubiquitin_12-27	CTSD_55-72	0.2195	0.1524	0
TPP1_61-78	CTSD_55-72	0.5154	0.0003	0
TPP1_507-520	CTSD_55-72	0.6008	<.0001	0
TPP1_246-259	CTSD_55-72	0.6763	<.0001	0
TCN2_45-59	CTSD_55-72	0.0214	0.8902	0
TCN2_393-399	CTSD_55-72	-0.0357	0.8182	0
TCN2_300-313	CTSD_55-72	0.0159	0.9183	0
FUCA1_344-354	CTSD_55-72	0.2815	0.0642	0
FUCA1_163-173	CTSD_55-72	0.2344	0.1257	0
FUCA1_114-130	CTSD_55-72	0.2868	0.0591	0
LYZ_69-80	CTSD_55-72	0.2038	0.1845	0
LYZ_52-59	CTSD_55-72	0.1665	0.2802	0
LAMP2_281-289	CTSD_55-72	0.3817	0.0106	0
LAMP2_153-161	CTSD_55-72	0.2498	0.102	0
LAMP2_145-152	CTSD_55-72	0.3111	0.0399	0
LAMP2_133-144	CTSD_55-72	0.371	0.0132	0
LAMP1_357-363	CTSD_55-72	0.4093	0.0058	0
LAMP1_327-337	CTSD_55-72	0.3156	0.0369	0
LAMP1_138-146	CTSD_55-72	0.4716	0.0012	0
HEXB_391-400	CTSD_55-72	0.4406	0.0028	0
HEXB_285-300	CTSD_55-72	0.5941	<.0001	0
GM2A_89-96	CTSD_55-72	0.1044	0.4999	0
GM2A_170-179	CTSD_55-72	0.1027	0.5069	0
DPP7_449-462	CTSD_55-72	0.4213	0.0044	0
DPP7_40-47	CTSD_55-72	0.449	0.0022	0
[truncated: 716 more rows]

## Sheet: Clincial Study II AD
Table S4. Spearman's correlation in the AD group of Clinical Study II (N = 36).
[truncated: 1,432 more rows]

[truncated: 1 more sheets: Clincial Study II PD]
