# Supplementary material for: Endo-lysosomal proteins and ubiquitin CSF concentrations in Alzheimer’s and Parkinson’s disease
Source: Alzheimers Res Ther. 2019 Sep 14;11:82. doi: 10.1186/s13195-019-0533-9 (PMC6745076; doi:10.1186/s13195-019-0533-9)

## **Additional File 9**

Endo-Lysosomal Proteins and Ubiquitin CSF Concentrations in Alzheimer's and Parkinson's Disease

Simon Sjödin<sup>1,2</sup>, Gunnar Brinkmalm<sup>1,2</sup>, Annika Öhrfelt<sup>1,2</sup>, Lucilla Parnetti<sup>3</sup>, Silvia Paciotti<sup>4</sup>, Oskar Hansson<sup>5,6</sup>, John Hardy<sup>7</sup>, Kaj Blennow<sup>1,2</sup>, Henrik Zetterberg<sup>1,2,7,8</sup>, Ann Brinkmalm<sup>1,2</sup>

<sup>1</sup>Department of Psychiatry and Neurochemistry, Institute of Neuroscience and Physiology, the Sahlgrenska Academy at the University of Gothenburg, Mölndal, Sweden

<sup>2</sup>Clinical Neurochemistry Laboratory, Sahlgrenska University Hospital, Mölndal, Sweden

<sup>3</sup>Neurology Clinic, University of Perugia, Perugia, Italy

<sup>4</sup>Department of Pharmaceutical Sciences, University of Perugia, Perugia, Italy

<sup>5</sup>Clinical Memory Research Unit, Department of Clinical Sciences Malmö, Lund University, Lund, Sweden

<sup>6</sup>Memory Clinic, Skåne University Hospital, Malmö, Sweden

<sup>7</sup>Department of Molecular Neuroscience, University College London Institute of Neurology, Queen Square, London, UK

<sup>8</sup>UK Dementia Research Institute at UCL, London, United Kingdom

Corresponding Author: Simon Sjödin, Department of Psychiatry and Neurochemistry, Institute of Neuroscience and Physiology, the Sahlgrenska Academy at the University of Gothenburg, House V3, SU/Mölndal, SE-43180, Mölndal, Sweden. [simon.sjodin@neuro.gu.se](mailto:simon.sjodin@neuro.gu.se).

## **Content**

Figure S4

**Figure S4. CSF protein concentrations in *APOE*  $\epsilon$ 4 carriers.** In Clinical Study II a subset of the participants had known *APOE* genotype. *APOE*  $\epsilon$ 4 carriers (*APOE*  $\epsilon$ 4 +), having one or two  $\epsilon$ 4 alleles, were compared to non-carriers (*APOE*  $\epsilon$ 4 -). The carriers vs. non-carriers were compared within the groups, controls (carriers, N = 10, non-carriers, N = 17) and AD (carriers, N = 25, non-carriers, N = 10), respectively. Significant different CSF concentrations were identified between control carriers and control non-carriers for peptides (A) C9\_232-242 (P <0.05), (B) C9\_497-508 (P <0.05), (C) CTSF\_442-450 (P <0.05), (D) DPP7\_113-123 (P <0.05) and (E) GM2A\_89-96 (P <0.05). Statistics were calculated using Wilcoxon 2-sample rank sum test and the graphs show Tukey boxplots.

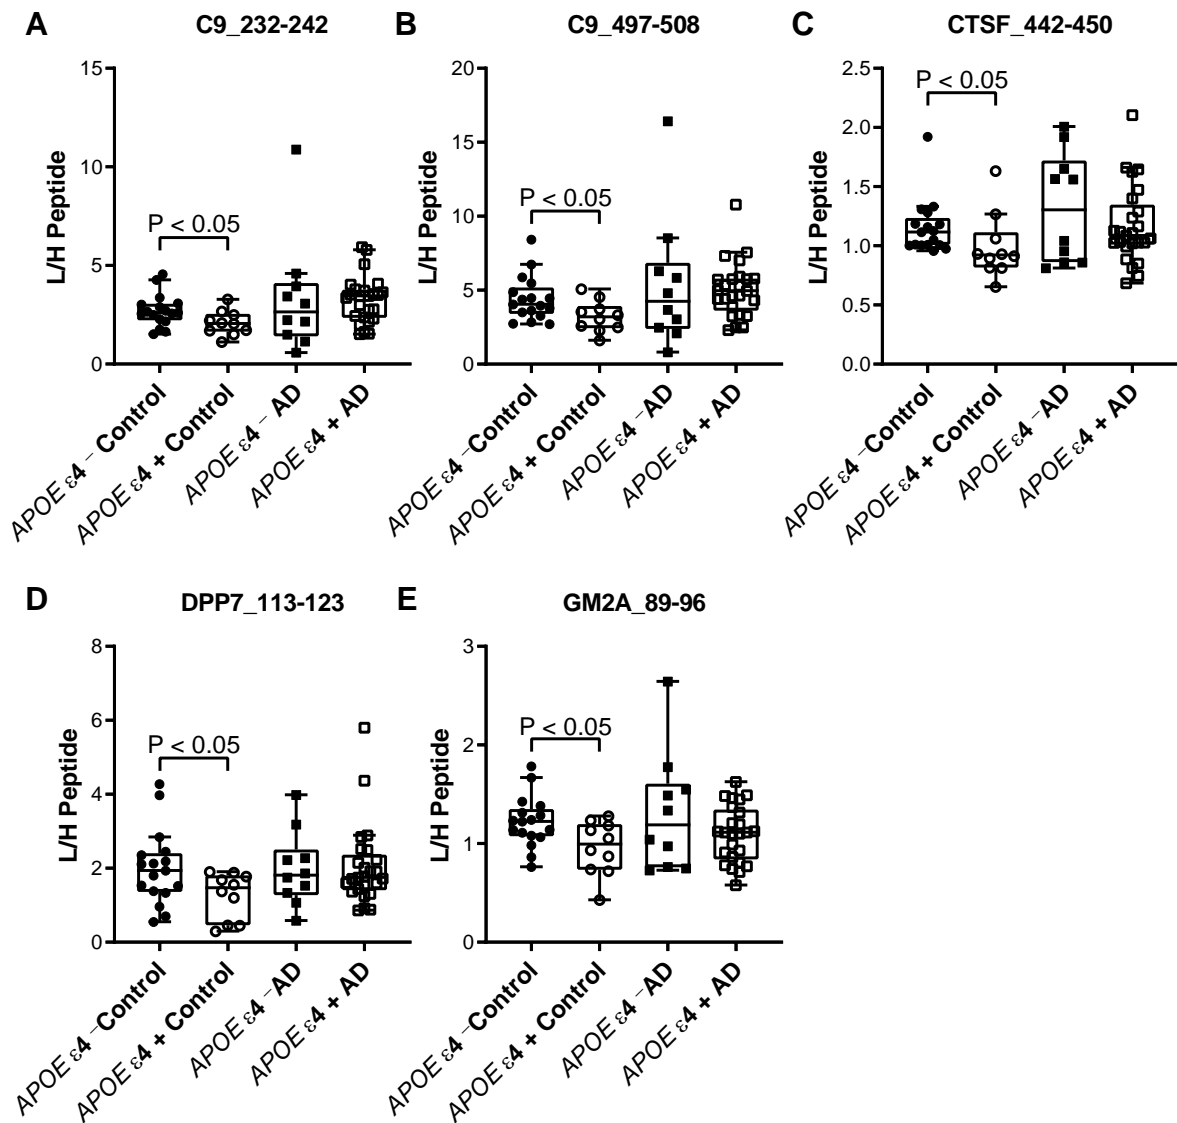

Supplement: Supplementary file 9 — Figure S4. CSF protein concentrations in APOE ε4 carriers. (PDF 193 kb) [file 13195_2019_533_MOESM9_ESM.pdf]
